# Supplementary material for: The 100-genomes strains, an S. cerevisiae resource that illuminates its natural phenotypic and genotypic variation and emergence as an opportunistic pathogen
Source: HighWire-hosted journal article supplement (doi:10.1101/gr.185538.114), 2015-04-03
Supplement: Table_S1.docx [file Table_S1.docx]

**Table S1**. List of 100 strains with their parental isolate name, geographic and environmental origin, as well as population; other relevant strains are also included.

| **Strain** | **Parental isolate or isogenic with** | **Isolate source or other name** | **Geographic origin** | **Environmental origin** | **Population** |
| --- | --- | --- | --- | --- | --- |
| YJM189 | YJM180 | NCYC 431 | Unknown | Distillery | wine/European |
| YJM193 | YJM184 | NCYC 914 | Unknown | Distillery | wine/European |
| YJM195 | YJM182 | NCYC 762 | Nigeria | Palm wine | West African |
| YJM244 | YJM210 | CBS 1227 | Romania | Clinical | wine/European |
| YJM248 | YJM218 | CBS 2910 | Unknown | Clinical (feces) | wine/European |
| YJM270 | YJM215 | CBS 2807 | Slovenia | Wine | wine/European |
| YJM271 | YJM214 | CBS 1782 | Unknown | Brewery | wine/European |
| YJM320 | YJM309 | CBS 7837 | CA, USA | Clinical | mosaic |
| YJM326 | YJM310 | CBS 7838 | CA, USA | Clinical | mosaic |
| YJM428 | YJM308 | CBS 7836 | CA, USA | Clinical | mosaic |
| YJM450 | YJM440 | 92-123 | CA, USA | Clinical | mosaic |
| YJM451 | YJM436 | B70302(b) | Unknown | Clinical | mosaic |
| YJM453 | YJM434 | B68019c | Unknown | Clinical | wine/European |
| YJM456 | YJM454 | 89-156 | CA, USA | Clinical | mosaic |
| YJM470 | YJM455 | SUH | CA, USA | Clinical | mosaic |
| YJM541 | YJM522 | SUH | CA, USA | Clinical | mosaic |
| YJM554 | YJM521 | SUH | CA, USA | Clinical | mosaic |
| YJM555 | YJM523 | SUH | CA, USA | Clinical | mosaic |
| YJM627 | Y55 | J.E. Haber | Unknown | Laboratory | West African |
| YJM681 | YJM653 | SUH | CA, USA | Clinical | mosaic |
| YJM682 | YJM668 | R87-91 | TX, USA | Clinical | mosaic |
| YJM683 | YJM678 | R93-1871 | TX, USA | Clinical | mosaic |
| YJM689 | YJM675 | R93-1017 | TX, USA | Clinical | mosaic |
| YJM693 | YJM669 | R91-48 | YX, USA | Clinical | mosaic |
| YJM969 | YJM967 | 96-98 | Italy | Clinical | wine/European |
| YJM972 | YJM947 | 96-100 | Italy | Clinical | wine/European |
| YJM975 | YJM948 | 96-101 | Italy | Clinical | wine/European |
| YJM978 | YJM954 | 96-109 | Italy | Clinical | wine/European |
| YJM981 | YJM955 | 96-110 | Italy | Clinical | wine/European |
| YJM984 | YJM956 | 96-112 | Italy | Clinical | wine/European |
| YJM987 | YJM957 | 96-113 | Italy | Clinical | wine/European |
| YJM990 | YJM963 | 96-119 | Italy | Clinical | wine/European |
| YJM993 | YJM964 | 96-120 | Italy | Clinical | wine/European |
| YJM996 | YJM965 | 96-121 | Italy | Clinical | wine/European |
| YJM1077 | YJM1076 | ATCC 204722 | ND | Laboratory | West African |
| YJM1078 | YJM1075 | NRRL YB-4348 | Portugal | Clinical | wine/European |
| YJM1083 | YJM1073 | NRRL Y-10,988 | NC, USA | Clinical | mosaic |
| YJM1129 | YJM1123 | NCMH 125 | OH, USA | Distillery | wine/European |
| YJM1133 | YJM1125 | MMRL 125 | NC, USA | Clinical | mosaic |
| YJM1190 | YJM1107 | C. Kaufman | MI, USA | Clinical | mosaic |
| YJM1199 | YJM1115 | C. Kaufman | MI, USA | Clinical | mosaic |
| YJM1202 | YJM1116 | C. Kaufman | MI, USA | Clinical | mosaic |
| YJM1208 | YJM1119 | 1882 | MI, USA | Clinical | mosaic |
| YJM1242 | YJM1213 | NRRL Y-35 | IL, USA | Fruit | wine/European |
| YJM1244 | YJM1215 | NRRL Y-1532 | Indonesia | Fruit | wine/European |
| YJM1248 | YJM1219 | NRRL Y-1546 | W. Africa | Wine | West African |
| YJM1250 | YJM1223 | NRRL Y-6673 | Unknown | Sugar cane | wine/European |
| YJM1252 | YJM1224 | NRRL Y-6679 | Spain | Alpechin | wine/European |
| YJM1273 | YPS134 | P. Sniegowski | PA, USA | Oak tree | North American |
| YJM1281 | YPS163 | P. Sniegowski | PA, USA | Oak | North American |
| YJM1290 | Sigma1278b |  | Unknown | Laboratory | mosaic |
| YJM1293 | isogenic with RM11 | L. Hartwell | CA, USA | Vineyard | wine/European |
| YJM1304 | YJM676 | R93-1092 | TX, USA | Clinical | mosaic |
| YJM1307 | YJM1071 | NRRL Y-961 | DC, USA | Clinical | mosaic |
| YJM1311 | YJM1101 | C. Kaufman | MI, USA | Clinical | mosaic |
| YJM1326 | YJM1289 | J. Bakken | MN, USA | Clinical | mosaic |
| YJM1332 | YJM1284 | M1-2 | Italy | Wine | wine/European |
| YJM1336 | YJM1285 | M28s2 | Italy | Wine | wine/European |
| YJM1338 | YJM1315 | NRRL Y-963 | MD, USA | Sour fig | mosaic |
| YJM1341 | YJM1323 | NRRL Y-12637 | South Africa | Wine | wine/European |
| YJM1342 | YJM1324 | NRRL Y-12638 | South Africa | Soil | mosaic |
| YJM1355 | YJM1344 | NRRL Y-234 | IL, USA | Molasses | wine/European |
| YJM1356 | YJM1349 | NRRL Y-747 | Unknown | Cider | wine/European |
| YJM1381 | YJM1357 | NRRL YB-427 | Trinidad | Rum fermentation | mosaic |
| YJM1383 | YJM1359 | NRRL Y-5511 | Philippines | Coconut | wine/European |
| YJM1385 | YJM1363 | NRRL Y-11857 | MD, USA | Sugar refinery | mosaic |
| YJM1386 | YJM1365 | NRRL Y-11878 | Jamaica | Sugar cane | mosaic |
| YJM1387 | YJM1366 | NRRL Y-12758 | Japan | Wine | wine/European |
| YJM1388 | YJM1367 | NRRL Y-12769 | Malaya | Fermented tapioca | sake |
| YJM1389 | YJM1368 | NRRL Y-17447 | Thailand | Sewage | sake |
| YJM1399 | YJM1393 | NRRL YB-908 | Unknown | Wild cherry tree gum | mosaic |
| YJM1400 | YJM1394 | NRRL YB-4081 | Philippines | Guava | mosaic |
| YJM1401 | YJM1395 | NRRL YB-4082 | Philippines | Papaya | mosaic |
| YJM1402 | YJM1396 | NRRL YB-4449 | Unknown | Grape vine | mosaic |
| YJM1415 | YJM1407 | NRRL Y-268 | France | Wine | wine/European |
| YJM1417 | YJM1411 | NRRL YB-2541 | HI, USA | ND | wine/European |
| YJM1418 | YJM1413 | NRRL YB-4506 | Japan | Oak tree | mosaic |
| YJM1419 | YJM1412 | NRRL YB-2625 | Unknown | Bagasse | mosaic |
| YJM1433 | Yllc17_E5 | Ed Louis | France | Wine | wine/European |
| YJM1434 | YPS606 | P. Sniegowski | PA, USA | Oak | North American |
| YJM1439 | NCYC110 | Ed Louis | W. Africa | Ginger beer | West African |
| YJM1443 | UWOPS83-787.3 | Ed Louis | Bahamas | Fruit | mosaic |
| YJM1444 | UWOPS87-2421 | Ed Louis | HI, USA | Cladode | mosaic |
| YJM1447 | UWOPS05-227.2 | Ed Louis | Malaysia | Bertam Palm | Malaysian |
| YJM145 | YJM128 | CBS 7833 | KS, USA | Clinical | mosaic |
| YJM1450 | 273614N | Ed Louis | Newcastle, UK | Clinical | wine/European |
| YJM1460 | Y12 | Ed Louis | Africa | Palm Wine | sake |
| YJM1463 | DBVPG1853 | Ed Louis | Ethiopia | White Tecc | wine/European |
| YJM1477 | YJM1468 | NRRL Y-581 | MO, USA | Blatz beer | wine/European |
| YJM1478 | YJM1470 | NRRL Y-1890 | Unknown | Kefir | wine/European |
| YJM1479 | YJM1474 | NRRL Y-6297 | Phillipines | Coconut tuba | mosaic |
| YJM1526 | YJM1506 | Phaff 74-29 | Unknown | Clinical (throat) | wine/European |
| YJM1527 | YJM1510 | Phaff 05-780 | Winters, CA | Prune | mosaic |
| YJM1529 | M22 | J. Fay | Unknown | Wine | wine/European |
| YJM1549 | DBVPG6040 | Ed Louis | Netherlands | Fermenting fruit juice | mosaic |
| YJM1552 | S1 | S288c | CA, USA | Rotten fig | mosaic |
| YJM1573 | YJM1566 | NRRL Y-12603 | India | Fermented food | mosaic |
| YJM1574 | N96 (=AWRI1775) | Unknown | Wine | wine/European |  |
| YJM1592 | YJM1585 | NRRL Y-17448 | Thailand | Sewage | sake |
| YJM1628 | YJM312 | 91-213 | CA, USA | Clinical | mosaic |
|  |  |  |  |  |  |
|  | Genotype/Note | | | | |
| S1 | S1 (*ho* *MATα*) was diploidized to generate YJM1552; isogenic with S288c | | | | |
| YJM789 | *ho*::hisG *MATα* *lys2*; isogenic derivative of prototrophic YJM145 (*HO*/*HO*) | | | | |
| YJM699 | Segregant of YJM676; YJM699 (*ho* *MATa*) was diploidized to generate YJM1304 | | | | |
| YJM1081 | Segregant of YJM1071; YJM1081 (*ho* *MATα*) was diploidized to generate YJM1307 | | | | |
| YJM1195 | Segregant of YJM1101; YJM1195 (*ho* *MATα*) was diploidized to generate YJM1311 | | | | |
| YJM1287 | Σ1278b (*ho* *MATα*); YJM1287 was diploidized to generate YJM1290 | | | | |
| YJM1615 | *HO*/*HO* *cox15*-ochre/*cox15*-ochre; isogenic with YJM1628 (*HO*/*HO* *COX15*/*COX15*) | | | | |
| YJM1617 | Isogenic with S288c; genotype is *ho*∆::kanMX4 *MATα* ρ- | | | | |
| YJM1846 | Isogenic with sequenced YJM1388 (*ho*), which was diploidized to generate YJM1846 | | | | |
| YJM1847 | Isogenic with sequenced YJM1419 (*ho*), which was diploidized to generate YJM1847 | | | | |
| YJM1869 | *HO*/*HO* *HIS3*/*HIS3*; isogenic with sequenced YJM1433 (*HO*/*HO* *his3*/*his3*) | | | | |
| YJM1870 | Isogenic with sequenced YJM1250 (*HO*), which ∆*ho* derivative was diploidized to generate YJM1870 | | | | |
