# Supplementary material for: The 100-genomes strains, an S. cerevisiae resource that illuminates its natural phenotypic and genotypic variation and emergence as an opportunistic pathogen
Source: HighWire-hosted journal article supplement (doi:10.1101/gr.185538.114), 2015-04-03
Supplement: Table_S2.xlsx [file Table_S2.xlsx]

## Sheet: tocount3.txt
Sequence	N's	Ambiguity codons	Incomplete telomeres	Fraction incomplete telomeres	Errors found by pilon	Fraction protein associated errors	Total identified errors	Sequence coverage	longest scaffold (kb)	N50 (kb)	N50 (kb) using scaffolds>200bp	N90 (kb)	N90 (kb) using scaffolds>200bp	# of scaffolds >200 bp
yjm1078_ver7a	38	5	28	0.875	85	0.391185	156	58.0033	483.566	105.033	105.658	31.473	34.686	227
yjm1083_ver7a	84	9	25	0.78125	76	0.309783	194	333.688	457.223	128.496	133.518	19.587	32.524	274
yjm1129_ver7a	52	12	24	0.75	93	0.438155	181	172.661	392.736	133.045	133.512	30.718	38.82	300
yjm1133_ver7a	88	14	22	0.6875	111	0.407285	235	50.4157	507.91	114.878	117.235	27.181	33.03	311
yjm1190_ver7a	110	9	23	0.71875	127	0.320755	269	26.4725	141.424	33.308	33.601	7.676	8.386	763
yjm1199_ver7a	100	18	21	0.65625	164	0.29745	303	53.6194	382.694	94.371	95.494	22.945	29.208	327
yjm1202_ver7a	79	2	19	0.59375	180	0.267263	280	542.77	376.992	136.145	145.478	25.679	39.014	241
yjm1208_ver7a	76	1	16	0.5	91	0.363929	184	122.077	486.903	141.166	141.241	26.576	33.997	304
yjm1242_ver7a	45	3	27	0.84375	72	0.495215	147	221.896	476.417	153.62	166.086	32.783	41.628	232
yjm1244_ver7a	70	10	27	0.84375	102	0.391304	209	58.0033	343.225	106.871	106.871	27.44	30.758	260
yjm1248_ver7a	80	2	30	0.9375	111	0.39075	223	56.823	325.526	85.127	86.815	17.828	22.566	345
yjm1250_ver7a	87	4	27	0.84375	101	0.343465	219	75.5392	309.637	109.928	109.928	23.049	26.842	376
yjm1252_ver7a	57	5	23	0.71875	78	0.399151	163	480.551	387.935	109.861	114.694	28.801	33.771	283
yjm1273_ver7a	67	1	22	0.6875	101	0.513774	191	266.242	569.903	159.967	160.349	34.359	38.029	230
yjm1304_ver7a	88	2	23	0.71875	79	0.389916	192	537.543	409.351	125.602	129.234	29.412	39.787	254
yjm1307_ver7a	102	2	23	0.71875	96	0.451827	223	309.745	394.293	110.631	114.188	17.097	30.95	333
yjm1311_ver7a	63	1	21	0.65625	182	0.324438	267	241.962	487.982	114.49	125.06	19.923	31.227	318
yjm1326_ver7a	101	5	23	0.71875	90	0.283505	219	665.689	348.28	111.025	115.435	22.086	34.114	367
yjm1332_ver7a	63	17	23	0.71875	103	0.330827	206	345.322	306.614	126.092	126.782	28.938	39.684	252
yjm1336_ver7a	58	5	24	0.75	62	0.517162	149	637.699	445.622	141.984	152.539	32.652	39.69	228
yjm1338_ver7a	70	8	21	0.65625	79	0.47619	178	192.558	476.572	123.946	130.095	32.945	35.646	243
yjm1341_ver7a	50	9	23	0.71875	84	0.393281	166	107.07	377.076	129.484	129.484	37.702	38.819	256
yjm1342_ver7a	72	2	28	0.875	75	0.359511	177	332.508	390.927	97.707	103.055	23.256	29.168	297
yjm1355_ver7a	91	12	29	0.90625	89	0.322289	221	407.878	407.951	114.774	115.473	20.9	31.81	288
yjm1356_ver7a	62	10	27	0.84375	71	0.496583	170	376.684	386.295	129.277	130.608	31.003	38.114	280
yjm1381_ver7a	78	8	23	0.71875	99	0.380126	208	312.611	526.327	108.62	109.936	16.448	31.266	317
yjm1383_ver7a	97	8	23	0.71875	85	0.32715	213	509.215	464.444	114.692	121.169	7.61	38.826	344
yjm1385_ver7a	110	4	23	0.71875	256	0.261013	393	226.112	385.672	110.089	113.353	15.789	23.233	339
yjm1386_ver7a	134	1	24	0.75	209	0.273494	368	109.937	381.102	111.602	114.72	34.453	35.933	319
yjm1387_ver7a	69	7	21	0.65625	136	0.409781	233	169.457	350.122	123.505	126.029	29.936	35.354	280
yjm1388_ver7a	66	18	23	0.71875	70	0.5837	177	311.093	476.439	118.076	129.994	32.482	35.646	225
yjm1389_ver7a	68	7	24	0.75	107	0.452055	206	46.3689	459.072	122.297	127.699	28.242	29.548	325
yjm1399_ver7a	104	2	27	0.84375	95	0.396194	228	102.855	485.691	114.755	118.314	23.28	31.022	362
yjm1400_ver7a	116	12	27	0.84375	92	0.351575	247	414.454	358.286	97.056	97.638	25.056	30.037	305
yjm1401_ver7a	116	7	26	0.8125	79	0.342644	228	375.167	389.73	114.787	116.303	26.947	33.161	337
yjm1402_ver7a	80	9	18	0.5625	101	0.518018	208	132.025	471.761	143.346	151.309	23.48	34.864	345
yjm1415_ver7a	48	4	24	0.75	74	0.442688	150	482.912	553.372	175.791	178.875	15.756	52.398	204
yjm1417_ver7a	48	10	29	0.90625	79	0.442748	166	441.77	531.143	136.011	148.937	28.351	46.902	194
yjm1418_ver7a	58	7	22	0.6875	81	0.504902	168	545.467	455.418	120.419	120.974	29.194	34.24	275
yjm1419_ver7a	87	12	22	0.6875	317	0.158114	438	49.0668	394.499	128.29	130.646	22.454	27.415	364
yjm1433_ver7a	88	2	21	0.65625	184	0.257048	295	53.9566	405.314	105.02	106.96	28.684	32.561	312
yjm1434_ver7a	79	0	20	0.625	96	0.50545	195	257.137	569.902	159.972	160.349	29.056	34.161	252
yjm1439_ver7a	103	1	32	1	125	0.36553	261	27.3155	325.505	73.071	73.172	19.592	22.203	358
yjm1443_ver7a	160	4	24	0.75	252	0.315423	440	48.7295	316.484	89.18	89.18	20.233	21.117	348
yjm1444_ver7a	98	4	23	0.71875	106	0.439834	231	33.217	412.175	121.39	121.845	29.942	31.341	297
yjm1447_ver7a	74	4	31	0.96875	139	0.566343	248	37.7696	347.224	84.37	86.14	16.999	20.764	477
yjm1450_ver7a	89	1	22	0.6875	182	0.310236	294	93.7496	430.346	109.804	110.526	24.016	26.679	300
yjm1460_ver7a	72	10	25	0.78125	85	0.455592	192	122.583	350.364	113.337	114.727	23.864	33.403	302
yjm1463_ver7a	94	4	23	0.71875	173	0.325581	294	238.758	383.04	106.781	114.089	8.112	32.744	317
yjm1477_ver7a	39	9	27	0.84375	67	0.506757	142	303	531.122	152.564	152.564	39.605	46.499	225
yjm1478_ver7a	59	8	24	0.75	96	0.460208	187	304.349	277.963	112.403	117.722	22.53	34.349	247
yjm1479_ver7a	106	9	29	0.90625	107	0.359855	251	107.239	358.255	102.667	105.578	27.898	29.545	310
yjm1526_ver7a	67	11	27	0.84375	78	0.398773	183	352.067	392.435	127.506	129.798	28.056	35.38	263
yjm1527_ver7a	77	6	17	0.53125	190	0.323484	290	59.015	553.184	150.513	151.283	31.909	35.283	303
yjm1549_ver7a	78	9	19	0.59375	159	0.316986	265	310.082	363.359	108.488	109.61	21.75	32.458	314
yjm1573_ver7a	61	2	18	0.5625	105	0.56044	186	120.559	476.574	151.706	151.706	37.966	39.43	217
yjm1574_ver7a	67	4	23	0.71875	247	0.238579	341	303.337	552.186	126.044	129.097	32.669	38.368	245
yjm1592_ver7a	80	8	25	0.78125	103	0.436229	216	45.5259	381.383	103.183	103.183	28.735	32.117	311
yjm1615_ver7a	83	0	19	0.59375	101	0.425665	203	77.8998	486.918	116.42	119.174	30.863	35.394	264
yjm189_ver7a	57	5	26	0.8125	84	0.371158	172	309.407	486.3	141.11	148.321	31.031	39.569	260
yjm193_ver7a	113	9	25	0.78125	152	0.330677	299	47.0434	383.022	105.607	106.821	25.013	30.989	316
yjm195_ver7a	115	3	30	0.9375	136	0.321839	284	43.8397	339.323	95.821	96.065	20.095	23.375	318
yjm244_ver7a	51	8	26	0.8125	87	0.450893	172	108.588	476.987	126.414	129.8	29.519	33.401	296
yjm248_ver7a	47	0	27	0.84375	81	0.369014	155	84.3072	449.95	108.715	108.715	30.939	32.557	283
yjm270_ver7a	42	4	27	0.84375	140	0.372984	213	103.529	382.988	123.635	124.556	31.028	36.55	223
yjm271_ver7a	92	1	27	0.84375	210	0.304279	330	61.3756	363.429	114.673	118.223	23.747	30.06	279
yjm320_ver7a	106	1	22	0.6875	106	0.338192	235	90.7145	376.661	109.236	114.693	24.277	28.082	378
yjm326_ver7a	115	17	22	0.6875	98	0.418571	252	349.369	429.93	102.857	109.991	19.837	29.862	363
yjm428_ver7a	119	9	18	0.5625	171	0.349794	317	58.0033	393.822	96.878	98.293	21.512	25.473	416
yjm450_ver7a	97	5	25	0.78125	98	0.374502	225	166.254	382.625	114.711	116.775	20.697	30.088	290
yjm451_ver7a	97	1	24	0.75	171	0.361963	293	34.0601	318.055	103.767	103.967	26.466	29.439	299
yjm453_ver7a	62	15	25	0.78125	82	0.387755	184	117.356	476.922	122.94	123.35	29.465	31.73	312
yjm456_ver7a	120	6	18	0.5625	105	0.380531	249	139.275	346.766	112.926	114.768	16.234	31.03	386
yjm470_ver7a	116	2	25	0.78125	103	0.317708	246	88.0167	466.576	101.785	108.461	17.495	26	368
yjm541_ver7a	114	5	20	0.625	89	0.392453	228	86.6678	393.416	102.996	105.57	24.982	30.007	310
yjm554_ver7a	127	1	21	0.65625	108	0.321361	257	91.389	429.27	87.416	90.208	22.51	25.696	349
yjm555_ver7a	105	11	22	0.6875	160	0.407789	298	132.194	394.028	126.679	139.555	13.906	30.665	320
yjm627_ver7a	104	2	27	0.84375	224	0.388095	357	45.6945	272.399	83.115	84.074	22.659	26.198	336
yjm681_ver7a	111	13	25	0.78125	122	0.421133	271	49.7412	211.283	55.501	56.041	15.281	16.337	445
yjm682_ver7a	96	8	22	0.6875	135	0.340159	261	87.3422	510.925	129.343	129.343	32.427	37.521	292
yjm683_ver7a	82	2	21	0.65625	114	0.336504	219	133.711	347.47	144.308	150.503	29.618	37.437	278
yjm689_ver7a	114	10	22	0.6875	225	0.301181	371	37.2638	214.381	64.098	64.991	17.281	19.486	473
yjm693_ver7a	80	1	21	0.65625	111	0.38756	213	50.9215	350.711	109.124	114.667	31.026	35.728	274
yjm969_ver7a	79	7	29	0.90625	196	0.324138	311	30.0134	157.33	55.447	55.888	14.127	15.067	492
yjm972_ver7a	49	16	28	0.875	205	0.272613	298	77.0568	393.044	130.007	135.98	24.961	39.699	199
yjm975_ver7a	63	13	28	0.875	153	0.422179	257	44.3456	125.348	33.426	33.731	8.928	9.501	740
yjm978_ver7a	39	1	25	0.78125	154	0.340067	219	68.1202	393.038	126.687	130.908	31.001	39.696	212
yjm981_ver7a	42	3	30	0.9375	209	0.284924	284	43.5025	374.067	86.169	87.471	22.464	25.841	309
yjm984_ver7a	65	13	29	0.90625	254	0.24032	361	22.0885	203.505	75.94	76.529	22.465	23.819	300
yjm987_ver7a	35	2	31	0.96875	122	0.344575	190	126.629	531.96	178.834	191.155	37.692	49.716	162
yjm990_ver7a	42	4	29	0.90625	115	0.494024	190	60.0267	515.949	130.453	141.473	39.211	41.523	212
yjm993_ver7a	2	13	29	0.90625	100	0.317808	144	150.404	552.962	157.5	164.399	44.815	46.56	182
yjm996_ver7a	42	5	26	0.8125	149	0.304478	222	137.758	553.056	161.101	175.997	29.86	39.683	222
