# Supplementary material for: The 100-genomes strains, an S. cerevisiae resource that illuminates its natural phenotypic and genotypic variation and emergence as an opportunistic pathogen
Source: HighWire-hosted journal article supplement (doi:10.1101/gr.185538.114), 2015-04-03
Supplement: Table_S3.xlsx [file Table_S3.xlsx]

## Sheet: tablestu.txt
PCR primers for RFLP strain confirmations. Nineteen primer pairs, in combination with restriction digestion, were identified to distinguish the strains in this study; (0) = PCR product is not cut and (1) = PCR product is cut by the designated enzyme.
	chr_position	90244949	20173152	150185671	41227819	41443796	110226041	130230927	40962567	80203612	130673975	41312055	80053879	80384861	90135451	100517094	100686497	110608445	130437852	160746242
		AvrII	BglII	BglII	ClaI	HindIII	HindIII	HindIII	KpnI	KpnI	KpnI	StuI	StuI	StuI	StuI	StuI	StuI	StuI	StuI	StuI
	forward:	TTGGGAGCTGGTTGAGACTCTCG	TGGCAATTGGACGTTCCTAAGAC	TCAAATAATAATTTATAACTACG	GAGTTAGAAAAGTATGGCATACG	CTTCAATGCCGGGTTAGTTAATC	AAACTGATATAGAGACATAGAGG	TTTGTCTCTGTCTTGATAGCTGC	AGCTCTAGCCCTGTCATTTCTGC	CAATACAATACTAGCCGCTAGTG	CAATAGTAGCATCCGTGGTGGAC	TATTGCATTTGTAATTTTATGAG	CAAACCATTCTATAAAGTTCATG	CGTTTCCACGTTTTAACGGCTTG	GAAACGGCTCCGTAACACCAAGG	TTTAGGTGAGTTGGGCTTGGACC	CCTTCGAGGTGAAAATTTTATGC	CCAGTTTGCAGTCTTTTACCAGC	AGTGAGGTCGTTGAAGATTTCAG	CTTCCTAATTTAACTTTATCAGC
	reverse:	CAAAAGTATTTTGTTAAGTTTGG	TCTTTAGAAGATGCAAACCCCTG	GCTGTGGAAAGAAAAATTAAGAG	AAAAGCATCTTGCATTGTCGAGG	AGAGGTATTGGGACTTCATATGC	CTTGCCACTTTTCGTTTTTCACG	AGTGAGGTCGTTGAAGATTTCAG	AGTCACTGTTCAATTGATTAACG	TTTATTATAAGCTTAGAGATACG	CTCTTACACTGATTTGGCTTACC	TTTTCTTGACAAAGGTACATCCG	TATATGAAATCCTCAGAGCCAGC	ACGAGTTTCCTGTCATCTTTTGG	TCCAAAGGCAGTAAAGCCAATGC	ACAACTGCGTAGTGATATGCTGC	GAGTTATCCACATCATCTCTGAG	TTCATGTTTCCTATTATTCATGG	GGGCCTGTGTTTGTATGAACACC	TTGACCCTGATATGCTCACATGG
394757	yjm1078	1	1	1	0	0	0	0	0	0	0	1	1	0	0	0	0	0	0	1
425950	yjm1083	1	1	1	1	0	1	0	1	1	1	0	1	1	1	0	1	1	1	1
396801	yjm1129	1	1	1	1	0	0	0	0	0	0	1	0	0	0	0	0	0	0	1
405050	yjm1133	1	1	1	1	0	1	0	0	0	0	0	0	1	0	1	0	1	1	1
421694	yjm1190	1	1	1	1	0	1	0	1	1	0	0	1	1	0	1	0	1	1	1
423890	yjm1199	1	1	1	0	0	1	0	1	1	1	0	0	1	1	0	1	0	1	1
425842	yjm1202	1	1	1	1	0	1	0	1	1	1	0	0	1	0	1	1	0	1	1
504110	yjm1208	0	1	1	0	1	1	1	0	1	1	0	1	1	0	1	0	1	0	0
265861	yjm1242	1	0	1	1	0	0	0	0	0	0	1	1	0	1	0	0	0	0	1
439813	yjm1244	1	1	1	0	1	1	0	0	0	1	1	1	0	0	0	0	0	0	1
419835	yjm1248/yjm1439	1	1	1	0	0	1	0	1	1	0	1	0	1	1	1	1	1	1	1
401061	yjm1250	1	1	1	1	0	0	0	0	0	1	1	1	0	1	1	0	0	0	1
403329	yjm1252	1	1	1	0	0	1	0	0	1	0	1	0	0	1	0	0	0	0	1
456666	yjm1273/yjm1434	1	1	1	0	1	1	0	1	1	1	0	0	1	1	0	1	1	1	1
409134	yjm1304	1	1	1	1	0	1	0	0	0	1	0	1	1	0	1	0	1	0	1
458609	yjm1307	1	1	1	1	1	1	0	1	1	1	1	0	0	0	1	1	0	1	1
507680	yjm1311	1	1	1	1	1	1	1	0	1	1	0	0	0	0	1	0	0	0	1
410933	yjm1326	0	1	1	0	0	0	0	1	1	0	1	1	0	0	1	0	0	1	1
396805	yjm1332	1	1	1	1	0	0	0	0	0	0	1	1	0	0	0	0	0	0	1
395909	yjm1336	1	1	1	1	0	0	0	0	0	0	1	1	0	1	0	0	0	0	0
442334	yjm1338	1	1	1	1	1	1	0	0	1	1	0	1	1	1	0	1	1	1	1
437125	yjm1341	1	1	1	1	1	1	0	0	1	0	1	1	0	1	0	0	0	0	0
415738	yjm1342	1	1	1	0	0	0	0	1	1	1	0	0	1	1	1	1	1	1	1
431835	yjm1355	1	1	1	0	1	0	0	0	0	1	1	0	1	1	0	1	1	1	1
429957	yjm1356	1	1	1	1	1	0	0	0	1	0	1	1	0	1	0	0	0	0	1
479026	yjm1381	1	1	1	1	0	0	1	1	1	0	0	0	1	0	1	0	0	1	1
426633	yjm1383	1	1	1	0	1	0	0	0	0	0	1	0	0	1	0	0	1	0	0
443011	yjm1385	1	1	1	0	1	0	0	1	0	0	1	0	1	1	0	0	0	0	0
445181	yjm1386	1	1	1	1	1	0	0	1	0	0	1	1	0	1	1	1	1	1	0
428804	yjm1387	1	1	1	1	1	0	0	0	1	0	0	1	0	0	0	0	0	0	0
524282	yjm1388	1	1	1	1	1	1	1	1	1	1	0	0	1	1	1	1	1	1	1
520186	yjm1389	1	1	1	1	1	1	1	1	1	0	0	0	1	1	1	1	1	1	1
395217	yjm1399	1	1	1	0	0	0	0	0	1	0	1	0	0	1	0	1	0	1	1
403450	yjm1400/yjm1479	1	1	1	0	0	1	0	0	1	0	0	0	1	1	1	1	1	1	1
509946	yjm1401	1	1	1	0	1	0	1	1	1	0	0	0	1	1	1	1	1	1	1
178170	yjm1402	1	1	0	0	1	1	0	0	1	1	0	0	1	1	1	1	1	1	1
428805	yjm1415	1	1	1	1	1	0	0	0	1	0	1	1	0	0	0	0	0	0	0
429701	yjm1417	1	1	1	1	1	0	0	0	0	0	1	1	0	1	0	0	0	0	1
415723	yjm1418	1	1	1	0	0	0	0	1	1	1	1	0	1	1	1	1	1	0	1
522234	yjm1419	1	1	1	0	1	1	1	1	1	1	0	0	1	1	1	1	1	1	1
495316	yjm1433	1	1	1	1	1	0	1	0	0	0	0	1	0	1	0	1	0	1	1
456282	yjm1443	1	1	1	0	1	1	0	1	0	1	0	0	1	0	0	1	1	1	1
418682	yjm1444	1	1	1	0	0	1	0	1	1	0	0	0	1	0	1	1	1	1	0
436218	yjm1447	1	1	1	0	1	1	0	0	1	0	0	0	1	1	1	1	1	1	1
481141	yjm1450	1	1	1	0	0	0	1	1	1	1	1	1	0	0	1	1	0	1	1
452602	yjm1460	1	1	1	0	1	1	0	1	1	0	0	0	1	1	1	1	1	1	1
400669	yjm1463	0	1	1	1	0	0	0	0	1	1	1	1	0	0	0	0	1	1	1
396933	yjm1477	1	1	1	1	0	0	0	0	0	0	1	1	0	1	0	0	0	0	1
442565	yjm1478	0	1	1	0	1	0	0	1	0	0	1	1	0	1	0	1	0	0	0
396673	yjm1526	0	1	1	1	0	0	0	0	1	0	1	0	0	1	0	0	0	0	1
452402	yjm1527	1	1	1	0	1	1	0	1	1	0	0	0	1	0	1	0	0	1	1
478602	yjm1549	0	1	1	1	0	0	1	1	1	0	0	0	1	1	0	0	1	0	1
440314	yjm1573	1	1	1	0	1	1	0	0	1	1	0	0	1	1	1	1	1	1	1
405380	yjm1574	1	1	1	1	0	1	0	0	1	0	0	1	0	1	0	0	0	0	1
454650	yjm1592	1	1	1	1	1	1	0	1	1	0	0	0	1	1	1	1	1	1	1
522602	yjm1615	0	1	1	1	1	1	1	1	1	1	0	0	1	0	1	1	1	0	0
429829	yjm189	1	1	1	1	1	0	0	0	1	0	1	1	0	0	0	0	0	0	1
437445	yjm193	0	1	1	1	1	1	0	0	0	0	1	1	0	1	0	1	0	0	1
419323	yjm195	0	1	1	0	0	1	0	1	1	0	1	0	1	1	1	1	1	1	1
401029	yjm244	1	1	1	1	0	0	0	0	0	1	1	1	0	1	0	0	0	0	1
407429	yjm248	1	1	1	0	0	1	0	0	1	1	1	1	0	1	0	0	0	0	1
405377	yjm270	1	1	1	1	0	1	0	0	1	0	1	0	0	1	0	0	0	0	1
437447	yjm271	0	1	1	1	1	1	0	0	0	0	1	1	1	1	0	1	0	0	1
398206	yjm320	1	1	1	0	0	0	0	0	1	1	0	1	1	0	1	1	1	1	0
505724	yjm326	1	1	1	0	1	1	1	0	1	1	0	1	0	0	1	1	1	1	1
522814	yjm428	1	1	1	1	1	1	1	1	0	1	0	1	1	0	1	0	1	1	0
423720	yjm450	1	1	1	0	0	1	0	1	1	1	0	0	0	0	1	0	1	0	1
513912	yjm451	1	1	1	0	1	0	1	1	1	1	0	0	0	0	1	1	1	1	1
394885	yjm453	1	1	1	0	0	0	0	0	0	0	1	1	0	1	0	0	0	0	1
415450	yjm456	1	1	1	0	0	0	0	1	0	1	0	0	1	1	0	1	1	1	1
449918	yjm470	0	1	1	1	1	0	0	1	1	1	0	1	1	0	1	1	1	1	1
394814	yjm541	1	1	1	0	0	0	0	0	0	0	0	1	1	0	1	0	1	1	1
403254	yjm554	1	1	1	0	0	1	0	0	1	0	0	1	1	0	1	0	0	1	1
414558	yjm555	1	1	1	0	0	0	0	1	1	1	0	1	1	0	0	1	1	1	0
419499	yjm627	1	1	1	0	0	1	0	1	0	0	1	0	1	1	1	0	1	0	1
396206	yjm681	1	1	1	1	0	0	0	0	1	0	0	1	1	1	1	0	1	0	0
521852	yjm682	1	1	1	0	1	1	1	1	0	1	0	1	0	0	1	1	1	1	1
505596	yjm683	1	1	1	0	1	1	1	0	0	1	0	1	0	1	1	1	1	1	1
425644	yjm689	1	1	1	1	0	1	0	1	0	1	0	1	0	1	1	0	1	0	1
445406	yjm693	1	1	1	1	1	0	0	1	1	0	0	1	1	1	0	1	1	1	0
429057	yjm969	0	1	1	1	1	0	0	0	0	0	1	0	0	0	0	0	0	0	1
429825	yjm972	1	1	1	1	1	0	0	0	1	0	1	0	0	0	0	0	0	0	1
428293	yjm975	0	1	1	1	1	0	0	0	1	0	1	1	0	0	0	0	0	0	0
428289	yjm978	0	1	1	1	1	0	0	0	1	0	1	0	0	0	0	0	0	0	0
428037	yjm981	0	1	1	1	1	0	0	0	0	0	1	1	0	0	0	0	0	0	0
428549	yjm984	1	1	1	1	1	0	0	0	0	0	1	1	0	0	0	0	0	0	0
428545	yjm987	1	1	1	1	1	0	0	0	0	0	1	0	0	0	0	0	0	0	0
429313	yjm990	0	1	1	1	1	0	0	0	1	0	1	0	0	0	0	0	0	0	1
429061	yjm993	0	1	1	1	1	0	0	0	0	0	1	1	0	0	0	0	0	0	1
429317	yjm996	0	1	1	1	1	0	0	0	1	0	1	1	0	0	0	0	0	0	1
524287	S288c	1	1	1	1	1	1	1	1	1	1	1	1	1	1	1	1	1	1	1
