# Supplementary material for: The 100-genomes strains, an S. cerevisiae resource that illuminates its natural phenotypic and genotypic variation and emergence as an opportunistic pathogen
Source: HighWire-hosted journal article supplement (doi:10.1101/gr.185538.114), 2015-04-03
Supplement: Table_S4.docx [file Table_S4.docx]

**Table S4**. Spore viability of the 100 strains when crossed with the S288c background strain YJM1617, and the PCR test result for the *ECM34-SSU1* translocation in the 100 strains.

| **YJM1617 × Strain** | **4 viable spore tetrads (n)** | **3 viable spore tetrads (n)** | **2 viable spore tetrads (n)** | **1 viable spore tetrads (n)** | **0 viable spore tetrads (n)** | **% viable spores** | **ECM34 & SSU1 (PCR)** |
| --- | --- | --- | --- | --- | --- | --- | --- |
| YJM145 | 61 | 25 | 4 | 4 | 2 | 86.2 | S288c-like |
| YJM189 | 5 | 25 | 15 | 0 | 3 | 65.1 | T ECM34-SSU1 |
| YJM193 | 38 | 6 | 2 | 2 | 0 | 91.7 | S288c-like |
| YJM195 | 5 | 3 | 27 | 5 | 8 | 45.8 | S288c-like |
| YJM244 | 30 | 7 | 8 | 1 | 2 | 82.3 | S288c-like |
| YJM248 | 42 | 4 | 1 | 0 | 1 | 94.8 | S288c-like |
| YJM270 | 35 | 5 | 5 | 1 | 2 | 86.5 | S288c-like |
| YJM271 | 43 | 2 | 3 | 0 | 0 | 95.8 | S288c-like |
| YJM320 | 35 | 5 | 7 | 1 | 0 | 88.5 | S288c-like |
| YJM326 | 30 | 9 | 6 | 0 | 3 | 82.8 | S288c-like |
| YJM428 | 39 | 6 | 2 | 0 | 1 | 92.7 | S288c-like |
| YJM450 | 33 | 9 | 3 | 0 | 3 | 85.9 | S288c-like |
| YJM451 | 34 | 8 | 5 | 0 | 1 | 88.5 | S288c-like |
| YJM453 | 72 | 16 | 3 | 0 | 5 | 89.1 | S288c-like |
| YJM456 | 6 | 9 | 46 | 14 | 21 | 40.9 | S288c-like |
| YJM470 | 24 | 8 | 3 | 0 | 1 | 87.5 | S288c-like |
| YJM541 | 66 | 16 | 7 | 3 | 4 | 85.7 | S288c-like |
| YJM554 | 34 | 4 | 7 | 0 | 3 | 84.4 | S288c-like |
| YJM555 | 35 | 7 | 3 | 1 | 2 | 87.5 | S288c-like |
| YJM627 | 29 | 13 | 4 | 2 | 0 | 85.9 | S288c-like |
| YJM681 | 44 | 3 | 1 | 0 | 0 | 97.4 | S288c-like |
| YJM682 | 38 | 7 | 3 | 0 | 0 | 93.2 | S288c-like |
| YJM683 | 42 | 5 | 1 | 0 | 0 | 96.3 | S288c-like |
| YJM689 | 39 | 6 | 2 | 0 | 1 | 92.7 | S288c-like |
| YJM693 | 37 | 6 | 4 | 1 | 0 | 91.1 | S288c-like |
| YJM969 | 5 | 17 | 21 | 3 | 2 | 60.4 | T ECM34-SSU1 |
| YJM972 | 4 | 25 | 13 | 5 | 1 | 63.5 | T ECM34-SSU1 |
| YJM975 | 31 | 13 | 2 | 0 | 2 | 87 | S288c-like |
| YJM978 | 11 | 21 | 13 | 3 | 0 | 70.8 | T ECM34-SSU1 |
| YJM981 | 6 | 21 | 14 | 4 | 3 | 62 | T ECM34-SSU1 |
| YJM984 | 34 | 8 | 4 | 1 | 1 | 88 | S288c-like |
| YJM987 | 7 | 26 | 12 | 2 | 1 | 68.7 | T ECM34-SSU1 |
| YJM990 | 25 | 11 | 10 | 0 | 2 | 79.7 | S288c-like |
| YJM993 | 35 | 9 | 3 | 0 | 1 | 90.1 | S288c-like |
| YJM996 | 4 | 26 | 14 | 1 | 3 | 62 | T ECM34-SSU1 |
| YJM1077 | 57 | 23 | 11 | 2 | 3 | 83.6 | S288c-like |
| YJM1078 | 37 | 7 | 3 | 1 | 0 | 91.7 | S288c-like |
| YJM1083 | 35 | 7 | 5 | 1 | 0 | 89.6 | S288c-like |
| YJM1129 | 3 | 15 | 16 | 10 | 4 | 51.6 | T ECM34-SSU1 |
| YJM1133 | 38 | 7 | 1 | 1 | 1 | 91.7 | S288c-like |
| YJM1190 | 32 | 8 | 4 | 4 | 0 | 85.4 | S288c-like |
| YJM1199 | 39 | 4 | 4 | 0 | 1 | 91.7 | S288c-like |
| YJM1202 | 41 | 4 | 3 | 0 | 0 | 94.8 | S288c-like |
| YJM1208 | 27 | 20 | 1 | 0 | 0 | 88.5 | S288c-like |
| YJM1242 | 40 | 1 | 5 | 1 | 1 | 90.6 | S288c-like |
| YJM1244 | 37 | 5 | 4 | 0 | 2 | 89.1 | S288c-like |
| YJM1248 | 28 | 11 | 8 | 0 | 1 | 83.5 | S288c-like |
| YJM1250 | 15 | 2 | 24 | 3 | 4 | 60.9 | S288c-like |
| YJM1252 | 37 | 7 | 2 | 0 | 2 | 90.1 | S288c-like |
| YJM1273 | 31 | 8 | 5 | 1 | 3 | 82.8 | S288c-like |
| YJM1281 | 66 | 17 | 11 | 0 | 2 | 87.8 | S288c-like |
| YJM1290 | 78 | 12 | 6 | 0 | 0 | 93.7 | S288c-like |
| YJM1293 | 61 | 22 | 9 | 2 | 2 | 85.9 | S288c-like |
| YJM1304 | 32 | 8 | 7 | 1 | 0 | 87 | S288c-like |
| YJM1307 | 68 | 16 | 5 | 4 | 3 | 87 | S288c-like |
| YJM1311 | 37 | 7 | 2 | 0 | 2 | 90.1 | S288c-like |
| YJM1326 | 35 | 7 | 5 | 1 | 0 | 89.6 | S288c-like |
| YJM1332 | 40 | 4 | 2 | 2 | 0 | 92.7 | S288c-like |
| YJM1336 | 35 | 10 | 2 | 1 | 0 | 91.1 | S288c-like |
| YJM1338 | 32 | 7 | 4 | 1 | 4 | 82.3 | S288c-like |
| YJM1341 | 70 | 17 | 7 | 0 | 2 | 89.8 | S288c-like |
| YJM1342 | 4 | 1 | 29 | 4 | 10 | 42.2 | S288c-like |
| YJM1355 | 38 | 7 | 2 | 0 | 1 | 92.2 | S288c-like |
| YJM1356 | 35 | 8 | 4 | 0 | 1 | 89.6 | S288c-like |
| YJM1381 | 36 | 5 | 6 | 1 | 0 | 89.6 | S288c-like |
| YJM1383 | 35 | 7 | 6 | 0 | 0 | 90.1 | S288c-like |
| YJM1385 | 30 | 11 | 3 | 0 | 4 | 82.8 | S288c-like |
| YJM1386 | 32 | 11 | 4 | 0 | 1 | 88 | S288c-like |
| YJM1387 | 16 | 2 | 51 | 14 | 13 | 48.4 | S288c-like |
| YJM1388 | 37 | 8 | 1 | 0 | 2 | 90.6 | S288c-like |
| YJM1389 | 34 | 11 | 3 | 0 | 0 | 91.1 | S288c-like |
| YJM1399 | 32 | 9 | 4 | 1 | 2 | 85.4 | S288c-like |
| YJM1400 | 35 | 9 | 3 | 0 | 1 | 90.1 | S288c-like |
| YJM1401 | 28 | 16 | 2 | 1 | 1 | 85.9 | S288c-like |
| YJM1402 | 31 | 6 | 11 | 0 | 0 | 85.4 | S288c-like |
| YJM1415 | 36 | 7 | 3 | 0 | 2 | 89.1 | S288c-like |
| YJM1417 | 43 | 4 | 1 | 0 | 0 | 96.9 | S288c-like |
| YJM1418 | 28 | 9 | 7 | 0 | 4 | 79.7 | S288c-like |
| YJM1419 | 31 | 9 | 5 | 2 | 1 | 84.9 | S288c-like |
| YJM1433 | 3 | 22 | 13 | 5 | 5 | 56.8 | S288c-like |
| YJM1434 | 31 | 12 | 1 | 0 | 4 | 84.4 | S288c-like |
| YJM1439 | 31 | 9 | 4 | 4 | 0 | 84.9 | S288c-like |
| YJM1443 | 12 | 1 | 21 | 4 | 10 | 50.5 | S288c-like |
| YJM1444 | 37 | 7 | 4 | 0 | 0 | 92.2 | S288c-like |
| YJM1447 | 0 | 0 | 1 | 19 | 76 | 5.5 | S288c-like |
| YJM1450 | 32 | 8 | 7 | 0 | 1 | 86.5 | S288c-like |
| YJM1460 | 35 | 7 | 4 | 1 | 1 | 88.5 | S288c-like |
| YJM1463 | 35 | 6 | 5 | 0 | 2 | 87.5 | S288c-like |
| YJM1477 | 39 | 3 | 3 | 2 | 1 | 90.1 | S288c-like |
| YJM1478 | 31 | 12 | 2 | 2 | 1 | 86.5 | S288c-like |
| YJM1479 | 37 | 6 | 5 | 0 | 0 | 91.7 | S288c-like |
| YJM1526 | 5 | 14 | 17 | 8 | 4 | 54.2 | T ECM34-SSU1 |
| YJM1527 | 35 | 5 | 2 | 0 | 6 | 82.8 | S288c-like |
| YJM1529 | 11 | 54 | 23 | 7 | 1 | 67.4 | T ECM34-SSU1 |
| YJM1549 | 8 | 28 | 10 | 1 | 1 | 71.3 | T ECM34-SSU1 |
| YJM1552 | 82 | 8 | 4 | 1 | 1 | 94 | S288c-like |
| YJM1573 | 37 | 4 | 6 | 0 | 1 | 89.6 | S288c-like |
| YJM1574 | 14 | 53 | 20 | 5 | 4 | 67.8 | T ECM34-SSU1 |
| YJM1592 | 6 | 1 | 31 | 6 | 4 | 49.5 | S288c-like |
| YJM1628 | 34 | 1 | 6 | 3 | 4 | 80.2 | S288c-like |
