# Supplementary material for: The 100-genomes strains, an S. cerevisiae resource that illuminates its natural phenotypic and genotypic variation and emergence as an opportunistic pathogen
Source: HighWire-hosted journal article supplement (doi:10.1101/gr.185538.114), 2015-04-03
Supplement: Table_S5.xlsx [file Table_S5.xlsx]

## Sheet: (A) Introgressed genes
List of genes that are introgressed, or putatively introgressed, deleted, and novel in one or more of the 93 strains. (A) Introgressed genes relative to S288c. This list does not include subtelomeric and duplicated genes. Introgression is relative to S288c. Gene notations: (1) = S288c-like, not introgressed; (0) = deleted; (P) = likely introgression from S. paradoxus (sequence identity ≥ 96%). (s…
Number	Systematic Name	Gene Name	Length	Feature Type	significant population association?	significant clinical association?	YJM1078	YJM1083	YJM1129	YJM1133	YJM1190	YJM1199	YJM1202	YJM1208	YJM1242	YJM1244	YJM1248	YJM1250	YJM1252	YJM1273	YJM1304	YJM1307	YJM1311	YJM1326	YJM1332	YJM1336	YJM1338	YJM1341	YJM1342	YJM1355	YJM1356	YJM1381	YJM1383	YJM1385	YJM1386	YJM1387	YJM1388	YJM1389	YJM1399	YJM1400	YJM1401	YJM1402	YJM1415	YJM1417	YJM1418	YJM1419	YJM1433	YJM1434	YJM1439
1	YAL036C	RBG1	1110	Verified	-	-	P	1	1	1	1	1	1	1	1	1	1	1	P	1	1	1	1	1	1	1	1	1	1	1	1	1	1	1	1	1	1	1	1	1	1	1	1	1	1	1	1	1	1
2	YAL037C-A	YAL037C-A	93	Uncharacterized	-	-	P	1	1	1	1	1	1	1	1	1	1	1	P	1	1	1	1	1	1	1	1	1	s	1	1	1	1	1	1	1	1	1	1	1	1	1	1	1	1	1	1	1	1
3	YAL037W	YAL037W	804	Uncharacterized	-	-	P	1	1	1	1	1	1	1	1	1	1	1	P	1	1	1	1	1	1	1	1	1	1	1	1	1	1	1	1	1	1	1	1	1	1	1	1	1	1	1	1	1	1
4	YAL039C	CYC3	810	Verified	-	-	P	1	1	1	1	1	1	1	1	1	1	1	P	1	1	1	1	1	1	1	1	1	1	1	1	1	1	1	1	1	1	1	1	1	1	1	1	1	1	1	1	1	1
5	YAL040C	CLN3	1743	Verified	-	-	P	1	1	1	1	1	1	1	1	1	1	1	1	1	1	1	1	1	1	1	1	1	1	1	1	1	1	1	1	1	1	1	1	1	1	1	1	1	1	1	1	1	1
6	YAL060W	BDH1	1149	Verified	-	-	1	1	1	1	1	1	1	1	1	1	1	1	s	1	1	1	1	1	1	1	1	1	1	1	1	1	1	1	1	1	1	1	1	1	1	1	1	1	1	1	1	1	1
7	YAL061W	BDH2	1254	Uncharacterized	-	-	1	1	1	1	1	1	1	1	1	1	1	1	P	1	1	1	1	1	1	1	1	1	1	1	1	1	1	1	1	1	1	1	1	1	1	1	1	1	1	1	1	1	1
8	YAL062W	GDH3	1374	Verified	-	-	1	1	1	1	1	1	1	1	1	1	1	1	P	1	1	1	1	1	1	1	1	1	1	1	1	1	1	1	1	1	1	1	1	1	1	1	1	1	1	1	1	1	1
9	YAR023C	YAR023C	540	Uncharacterized	-	-	1	1	1	s	1	s	s	1	1	1	1	1	1	1	1	1	s	s	1	1	1	1	1	1	s	1	s	1	s	1	1	1	s	1	1	1	1	s	1	1	1	1	1
10	YAR028W	YAR028W	705	Uncharacterized	-	-	1	1	1	0	1	0	0	1	1	1	1	1	1	1	1	1	0	0	1	1	1	1	1	0	P	1	0	0	P	1	0	0	P	1	1	0	1	P	0	0	1	1	1
11	YAR042W	SWH1	3567	Verified	-	-	1	1	1	1	1	1	1	1	1	1	1	1	1	1	1	1	1	1	1	1	1	1	1	1	1	1	1	1	1	1	1	1	P	1	1	1	1	1	1	1	1	1	1
12	YBR007C	DSF2	2211	Uncharacterized	-	-	1	1	1	1	1	1	1	1	1	1	1	1	P	1	1	1	1	1	1	1	1	1	1	1	1	1	1	1	1	1	1	1	1	1	1	1	1	1	1	1	1	1	1
13	YBR008C	FLR1	1647	Verified	-	-	P	1	1	1	1	1	1	1	1	1	1	1	P	1	1	1	1	1	1	1	1	1	1	1	1	1	1	1	1	1	1	1	1	1	1	1	1	1	1	1	1	1	1
14	YBR013C	YBR013C	390	Uncharacterized	-	-	1	1	1	1	1	1	1	1	1	1	s	1	1	1	1	1	1	1	1	1	1	1	1	s	1	1	1	1	1	1	1	1	1	1	1	1	1	1	1	1	1	1	s
15	YBR017C	KAP104	2757	Verified	-	-	1	1	1	1	1	1	1	1	1	1	1	1	1	1	1	1	1	1	1	1	1	1	s	1	1	1	1	1	1	1	1	1	1	1	1	1	1	1	1	1	1	1	1
16	YBR018C	GAL7	1101	Verified	-	-	1	1	1	1	1	1	1	1	1	1	1	1	1	1	1	1	1	1	1	1	1	1	s	1	1	1	1	1	1	1	1	1	1	1	1	1	1	1	1	1	1	1	1
17	YBR019C	GAL10	2100	Verified	-	-	1	1	1	1	1	1	1	1	1	1	1	1	1	1	1	1	1	1	1	1	1	1	s	1	1	1	1	1	1	1	1	1	1	1	1	1	1	1	1	1	1	1	1
18	YBR020W	GAL1	1587	Verified	-	-	1	1	1	1	1	1	1	1	1	1	1	1	1	1	1	1	1	1	1	1	1	1	s	1	1	1	1	1	1	1	1	1	1	1	1	1	1	1	1	1	1	1	1
19	YBR021W	FUR4	1902	Verified	-	-	1	1	1	1	1	1	1	1	1	1	1	1	1	1	1	1	1	1	1	1	1	1	s	1	1	1	1	1	1	1	1	1	1	1	1	1	1	1	1	1	1	1	1
20	YBR039W	ATP3	936	Verified	-	-	1	1	1	1	1	1	1	1	1	1	1	1	P	1	1	1	1	1	1	1	1	1	1	1	1	1	1	1	1	1	1	1	1	1	1	1	1	1	1	1	1	1	1
21	YBR040W	FIG1	897	Verified	-	-	1	1	1	1	1	1	1	1	1	1	1	1	P	1	1	1	1	1	1	1	1	1	1	1	1	1	1	1	1	1	1	1	1	1	1	1	1	1	1	1	1	1	1
22	YBR041W	FAT1	2010	Verified	-	-	1	1	1	1	1	1	1	1	1	1	1	1	P	1	1	1	1	1	1	1	1	1	1	1	1	1	1	1	1	1	1	1	1	1	1	1	1	1	1	1	1	1	1
23	YBR042C	CST26	1194	Verified	-	-	1	1	1	1	1	1	1	1	1	1	1	1	P	1	1	1	1	1	1	1	1	1	1	1	1	1	1	1	1	1	1	1	1	1	1	1	1	1	1	1	1	1	1
24	YBR043C	QDR3	2070	Verified	-	-	1	1	1	1	1	1	1	1	1	1	1	1	P	1	1	1	1	1	1	1	1	1	1	1	1	1	1	1	1	1	1	1	1	1	1	1	1	1	1	1	1	1	1
25	YBR047W	FMP23	528	Uncharacterized	-	-	P	1	1	1	1	1	1	1	1	1	1	1	1	1	1	1	1	1	1	1	1	1	1	1	1	1	1	1	1	1	1	1	1	1	1	1	1	1	1	1	1	1	1
26	YBR048W	RPS11B	982	Verified	-	-	P	1	1	1	1	1	1	1	1	1	1	1	1	1	1	1	1	1	1	1	1	1	1	1	1	1	1	1	1	1	1	1	1	1	1	1	1	1	1	1	1	1	1
27	YBR060C	ORC2	1863	Verified	-	-	s	1	1	1	1	1	1	1	1	1	1	1	s	1	1	1	1	1	1	1	1	1	1	1	1	1	1	1	1	1	1	1	1	1	1	1	1	1	1	1	1	1	1
28	YBR061C	TRM7	933	Verified	-	-	P	1	1	1	1	1	1	1	1	1	1	1	P	1	1	1	1	1	1	1	1	1	1	1	1	1	1	1	1	1	1	1	1	1	1	1	1	1	1	1	1	1	1
29	YBR062C	YBR062C	625	Uncharacterized	-	-	P	1	1	1	1	1	1	1	1	1	1	1	P	1	1	1	1	1	1	1	1	1	1	1	1	1	1	1	1	1	1	1	1	1	1	1	1	1	1	1	1	1	1
30	YBR063C	YBR063C	1215	Uncharacterized	-	-	P	1	1	1	1	1	1	1	1	1	1	1	P	1	1	1	1	1	1	1	1	1	1	1	1	1	1	1	1	1	1	1	1	1	1	1	1	1	1	1	1	1	1
31	YBR065C	ECM2	1095	Verified	-	-	P	1	1	1	1	1	1	1	1	1	1	1	P	1	1	1	1	1	1	1	1	1	1	1	1	1	1	1	1	1	1	1	1	1	1	1	1	1	1	1	1	1	1
32	YBR066C	NRG2	663	Verified	-	-	P	1	1	1	1	1	1	1	1	1	1	1	P	1	1	1	1	1	1	1	1	1	1	1	1	1	1	1	1	1	1	1	1	1	1	1	1	1	1	1	1	1	1
33	YBR067C	TIP1	633	Verified	-	-	P	1	1	1	1	1	1	1	1	1	1	1	P	1	1	1	1	1	1	1	1	1	s	1	1	1	1	1	1	1	1	1	1	s	1	1	1	1	1	1	1	1	1
34	YBR072C-A	YBR072C-A	162	Uncharacterized	-	-	P	1	1	1	1	1	1	1	1	1	1	1	1	1	1	1	1	1	1	1	1	1	1	1	1	1	1	1	1	1	1	1	1	s	1	1	1	1	1	1	1	1	1
35	YBR072W	HSP26	645	Verified	-	-	s	1	1	1	1	1	1	1	1	1	1	1	1	1	1	1	1	1	1	1	1	1	1	1	1	1	1	1	1	1	1	1	1	1	1	1	1	1	1	1	1	1	1
36	YBR073W	RDH54	2877	Verified	-	-	P	1	1	1	1	1	1	1	1	1	1	1	1	1	1	1	1	1	1	1	1	1	1	1	1	1	1	1	1	1	1	1	1	1	1	1	1	1	1	1	1	1	1
37	YBR074W	YBR074W	2931	Uncharacterized	-	-	P	1	1	1	1	1	1	1	1	1	1	1	1	1	1	1	1	1	1	1	1	1	1	1	1	1	1	1	1	1	1	1	1	1	1	1	1	1	1	1	1	1	1
38	YBR076W	ECM8	1065	Verified	-	-	P	1	1	1	1	1	1	1	1	1	1	1	1	1	1	1	1	1	1	1	1	1	1	1	1	1	1	1	1	1	1	1	1	1	1	1	1	1	1	1	1	1	1
39	YBR077C	SLM4	489	Verified	-	-	P	1	1	1	1	1	1	1	1	1	1	1	P	1	1	1	1	1	1	1	1	1	1	1	1	1	1	1	1	1	1	1	1	1	1	1	1	1	1	1	1	1	1
40	YBR078W	ECM33	1620	Verified	-	-	P	1	1	1	1	1	1	1	1	1	1	1	P	1	1	1	1	1	1	1	1	1	1	1	1	1	1	1	1	1	1	1	1	1	1	1	1	1	1	1	1	1	1
41	YBR187W	GDT1	843	Uncharacterized	-	-	1	1	1	s	1	1	1	1	1	1	1	1	1	1	1	1	1	1	1	1	1	1	s	1	1	1	1	1	1	1	1	1	1	s	s	1	1	1	1	1	1	1	1
42	YBR189W	RPS9B	1001	Verified	-	-	1	1	1	s	1	1	1	1	1	1	1	1	1	1	1	1	1	1	1	1	1	1	s	1	1	1	1	1	1	1	1	1	1	s	s	1	1	1	1	1	1	1	1
43	YBR199W	KTR4	1395	Verified	-	-	1	1	1	1	1	1	1	1	1	1	1	1	1	1	1	1	1	1	1	1	1	1	1	1	1	1	1	1	1	1	1	1	1	1	1	1	1	1	s	1	1	1	1
44	YBR293W	VBA2	1425	Verified	-	-	1	1	1	1	1	1	1	1	1	1	1	1	1	1	1	1	1	1	1	1	1	1	1	P	1	1	1	1	1	1	1	1	P	1	1	1	1	1	1	1	1	1	1
45	YBR294W	SUL1	2580	Verified	-	-	1	1	1	1	1	1	1	1	1	1	1	1	1	1	1	1	1	1	1	1	1	1	1	P	1	1	1	1	1	1	1	1	P	1	1	1	1	1	1	1	1	1	1
46	YBR296C	PHO89	1725	Verified	-	-	1	1	1	1	1	1	1	1	1	1	1	1	1	1	1	1	1	1	1	1	1	1	1	P	1	1	1	1	1	1	1	1	P	1	1	1	1	1	1	1	1	1	1
47	YCL001W	RER1	567	Verified	-	-	1	1	1	1	1	1	1	1	1	1	1	1	1	1	P	1	1	1	1	1	1	1	1	1	1	1	1	1	1	1	1	1	1	1	1	1	1	1	1	1	1	1	1
48	YCL001W-B	YCL001W-B	255	Uncharacterized	-	-	1	1	1	1	1	1	1	1	1	1	1	1	1	1	P	1	1	1	1	1	1	1	1	1	1	1	1	1	1	1	1	1	1	1	1	1	1	1	1	1	1	1	1
49	YCL002C	YCL002C	868	Uncharacterized	-	-	1	1	1	1	1	1	1	1	1	1	1	1	1	1	P	1	1	1	1	1	1	1	1	1	1	1	1	1	1	1	1	1	1	1	1	1	1	1	1	1	1	1	1
50	YCL004W	PGS1	1566	Verified	-	-	1	1	1	1	1	1	1	1	1	1	1	1	1	1	P	1	1	1	1	1	1	1	1	1	1	1	1	1	1	1	1	1	1	1	1	1	1	1	1	1	1	1	1
51	YCL005W	LDB16	771	Verified	-	-	1	1	1	1	1	1	1	1	1	1	1	1	1	1	P	1	1	1	1	1	1	1	1	1	1	1	1	1	1	1	1	1	1	1	1	1	1	1	1	1	1	1	1
52	YCL005W-A	VMA9	395	Verified	-	-	1	1	1	1	1	1	1	1	1	1	1	1	1	1	1	1	1	1	1	1	1	1	1	1	1	1	1	1	1	1	1	1	1	1	1	1	1	1	1	1	1	1	1
53	YCL008C	STP22	1158	Verified	-	-	1	1	1	1	1	1	1	1	1	1	1	1	1	1	1	1	1	1	1	1	1	1	1	1	1	1	1	1	1	1	1	1	1	1	1	1	1	1	1	1	1	1	1
54	YCL009C	ILV6	930	Verified	-	-	1	1	1	1	1	1	1	1	1	1	1	1	1	1	1	1	1	1	1	1	1	1	1	1	1	1	1	1	1	1	1	1	1	1	1	1	1	1	1	1	1	1	1
55	YCR002C	CDC10	969	Verified	-	-	1	1	1	1	1	1	1	1	1	1	1	1	1	1	P	1	1	1	1	1	1	1	1	1	1	1	1	1	1	1	1	1	1	1	1	1	1	1	1	1	1	1	1
56	YCR003W	MRPL32	552	Verified	-	-	1	1	1	1	1	1	1	1	1	1	1	1	1	1	P	1	1	1	1	1	1	1	1	1	1	1	1	1	1	1	1	1	1	1	1	1	1	1	1	1	1	1	1
57	YCR004C	YCP4	744	Verified	-	-	1	1	1	1	1	1	1	1	1	1	1	1	1	1	P	1	1	1	1	1	1	1	1	1	1	1	1	1	1	1	1	1	1	1	1	1	1	1	1	1	1	1	1
58	YCR005C	CIT2	1383	Verified	-	-	1	1	1	1	1	1	1	1	1	1	1	1	1	1	P	1	1	1	1	1	1	1	1	1	1	1	1	1	1	1	1	1	1	1	1	1	1	1	1	1	1	1	1
59	YCR007C	YCR007C	720	Uncharacterized	-	-	1	1	1	1	1	1	1	1	1	1	1	1	1	1	P	1	1	1	1	1	1	1	1	1	1	1	1	1	1	1	1	1	1	1	1	1	1	1	1	1	1	1	1
60	YCR008W	SAT4	1812	Verified	-	-	1	1	1	1	1	1	1	1	1	1	1	1	1	1	P	1	1	1	1	1	1	1	1	1	1	1	1	1	1	1	1	1	1	1	1	1	1	1	1	1	1	1	1
61	YCR009C	RVS161	798	Verified	-	-	1	1	1	1	1	1	1	1	1	1	1	1	1	1	P	1	1	1	1	1	1	1	1	1	1	1	1	1	1	1	1	1	1	1	1	1	1	1	1	1	1	1	1
62	YCR010C	ADY2	852	Verified	-	-	1	1	1	1	1	1	1	1	1	1	1	1	1	1	P	1	1	1	1	1	1	1	1	1	1	1	1	1	1	1	1	1	1	1	1	1	1	1	1	1	1	1	1
63	YCR073C	SSK22	3996	Verified	-	-	1	1	1	1	1	1	1	1	1	1	1	1	P	1	1	1	1	1	1	1	1	1	1	1	1	1	1	1	1	1	1	1	1	1	1	1	1	1	1	1	1	1	1
64	YCR073W-A	SOL2	948	Verified	-	-	1	1	1	1	1	1	1	1	1	1	1	1	P	1	1	1	1	1	1	1	1	1	1	1	1	1	1	1	1	1	1	1	1	1	1	1	1	1	1	1	1	1	1
65	YCR098C	GIT1	1557	Verified	-	-	P	1	1	1	1	1	1	1	1	1	1	1	P	1	1	1	1	1	1	1	1	1	1	1	1	1	1	1	1	1	1	1	1	1	1	1	1	1	1	1	1	1	1
66	YDL007C-A	YDL007C-A	258	Uncharacterized	-	-	1	1	1	1	1	1	1	1	1	1	1	1	P	1	1	1	1	1	1	1	1	1	1	1	1	1	1	1	1	1	1	1	1	1	1	1	1	1	1	1	1	1	1
67	YDL007W	RPT2	1314	Verified	-	-	1	1	1	1	1	1	1	1	1	1	1	1	P	1	1	1	1	1	1	1	1	1	1	1	1	1	1	1	1	1	1	1	1	1	1	1	1	1	1	1	1	1	1
68	YDL008W	APC11	498	Verified	-	-	1	1	1	1	1	1	1	1	1	1	1	1	P	1	1	1	1	1	1	1	1	1	1	1	1	1	1	1	1	1	1	1	1	1	1	1	1	1	1	1	1	1	1
69	YDL010W	GRX6	696	Verified	-	-	1	1	1	1	1	1	1	1	1	1	1	1	P	1	1	1	1	1	1	1	1	1	1	1	1	1	1	1	1	1	1	1	1	1	1	1	1	1	1	1	1	1	1
70	YDL012C	YDL012C	410	Verified	-	-	P	1	1	1	1	1	1	1	1	1	1	1	P	1	1	1	1	1	1	1	1	1	1	1	1	1	1	1	1	1	1	1	1	1	1	1	1	1	1	1	1	1	1
71	YDL013W	SLX5	1860	Verified	-	-	P	1	1	1	1	1	1	1	1	1	1	1	P	1	1	1	1	1	1	1	1	1	1	1	1	1	1	1	1	1	1	1	1	1	1	1	1	1	1	1	1	1	1
72	YDL014W	NOP1	984	Verified	-	-	1	1	1	1	1	1	1	1	1	1	1	1	1	1	1	1	1	1	1	1	1	1	1	1	1	1	1	1	1	1	1	1	1	1	1	1	1	1	1	1	1	1	1
73	YDL015C	TSC13	933	Verified	-	-	1	1	1	1	1	1	1	1	1	1	1	1	1	1	1	1	1	1	1	1	1	1	1	1	1	1	1	1	1	1	1	1	1	1	1	1	1	1	1	1	1	1	1
74	YDL072C	YET3	612	Verified	-	-	P	1	1	1	1	1	1	1	1	1	1	1	P	1	1	1	1	1	1	1	1	1	1	1	1	1	1	1	1	1	1	1	1	1	1	1	1	1	1	1	1	1	1
75	YDL073W	YDL073W	2955	Uncharacterized	-	-	P	1	1	1	1	1	1	1	1	1	1	1	P	1	1	1	1	1	1	1	1	1	1	1	1	1	1	1	1	1	1	1	1	1	1	1	1	1	1	1	1	1	1
76	YDL157C	YDL157C	357	Uncharacterized	-	-	P	1	1	1	1	1	1	1	1	1	1	1	1	1	1	1	1	1	1	1	1	1	1	1	1	1	1	1	1	1	1	1	1	1	1	1	1	1	1	1	1	1	1
77	YDL159W	STE7	1548	Verified	-	-	P	1	1	1	1	1	1	1	1	1	1	1	1	1	1	1	1	1	1	1	1	1	1	1	1	1	1	1	1	1	1	1	1	1	1	1	1	1	1	1	1	1	1
78	YDL159W-A	YDL159W-A	132	Uncharacterized	-	-	P	1	1	1	1	1	1	1	1	1	1	1	1	1	1	1	1	1	1	1	1	1	1	1	1	1	1	1	1	1	1	1	1	1	1	1	1	1	1	1	1	1	1
79	YDL160C	DHH1	1521	Verified	-	-	P	1	1	1	1	1	1	1	1	1	1	1	1	1	1	1	1	1	1	1	1	1	1	1	1	1	1	1	1	1	1	1	1	1	1	1	1	1	1	1	1	1	1
80	YDL160C-A	YDL160C-A	243	Uncharacterized	-	-	P	1	1	1	1	1	1	1	1	1	1	1	1	1	1	1	1	1	1	1	1	1	1	1	1	1	1	1	1	1	1	1	1	1	1	1	1	1	1	1	1	1	1
81	YDL161W	ENT1	1365	Verified	-	-	P	1	1	1	1	1	1	1	1	1	1	1	1	1	1	1	1	1	1	1	1	1	1	1	1	1	1	1	1	1	1	1	1	1	1	1	1	1	1	1	1	1	1
82	YDL164C	CDC9	2268	Verified	-	-	P	1	1	1	1	1	1	1	1	1	1	1	1	1	1	1	1	1	1	1	1	1	1	1	1	1	1	1	1	1	1	1	1	1	1	1	1	1	1	1	1	1	1
83	YDL165W	CDC36	576	Verified	-	-	P	1	1	1	1	1	1	1	1	1	1	1	1	1	1	1	1	1	1	1	1	1	1	1	1	1	1	1	1	1	1	1	1	1	1	1	1	1	1	1	1	1	1
84	YDL166C	FAP7	594	Verified	-	-	P	1	1	1	1	1	1	1	1	1	1	1	1	1	1	1	1	1	1	1	1	1	1	1	1	1	1	1	1	1	1	1	1	1	1	1	1	1	1	1	1	1	1
85	YDL167C	NRP1	2160	Verified	-	-	P	1	1	1	1	1	1	1	1	1	1	1	1	1	1	1	1	1	1	1	1	1	1	1	1	1	1	1	1	1	1	1	1	1	1	1	1	1	1	1	1	1	1
86	YDL235C	YPD1	504	Verified	-	-	1	1	1	1	1	1	1	1	1	1	1	1	P	1	1	1	1	1	1	1	1	1	1	1	1	1	1	1	1	1	1	1	1	1	1	1	1	1	1	1	1	1	1
87	YDL236W	PHO13	939	Verified	-	-	1	1	1	1	1	1	1	1	1	1	1	1	P	1	1	1	1	1	1	1	1	1	1	1	1	1	1	1	1	1	1	1	1	1	1	1	1	1	1	1	1	1	1
88	YDL237W	AIM6	1173	Verified	-	-	1	1	1	1	1	1	1	1	1	1	1	1	P	1	1	1	1	1	1	1	1	1	1	1	1	1	1	1	1	1	1	1	1	1	1	1	1	1	1	1	1	1	1
89	YDL238C	GUD1	1470	Verified	-	-	1	1	1	1	1	1	1	1	1	1	1	1	P	1	1	1	1	1	1	1	1	1	1	1	1	1	1	1	1	1	1	1	1	1	1	1	1	1	1	1	1	1	1
90	YDL239C	ADY3	2373	Verified	-	-	1	1	1	1	1	1	1	1	1	1	1	1	P	1	1	1	1	1	1	1	1	1	1	1	1	1	1	1	1	1	1	1	1	1	1	1	1	1	1	1	1	1	1
91	YDL240W	LRG1	3054	Verified	-	-	1	1	1	1	1	1	1	1	1	1	1	1	P	1	1	1	1	1	1	1	1	1	1	1	1	1	1	1	1	1	1	1	1	1	1	1	1	1	1	1	1	1	1
92	YDL241W	YDL241W	372	Uncharacterized	-	-	1	1	1	1	1	1	1	1	1	1	1	1	P	1	1	1	1	1	1	1	1	1	1	1	1	1	1	1	1	1	1	1	1	1	1	1	1	1	1	1	1	1	1
93	YDR033W	MRH1	963	Verified	-	-	1	1	1	1	1	1	1	1	1	1	1	1	P	1	1	1	1	1	1	1	1	1	1	1	1	1	1	1	1	1	1	1	1	1	1	1	1	1	1	1	1	1	1
94	YDR034C	LYS14	2373	Verified	-	-	1	1	1	1	1	1	1	1	1	1	1	1	P	1	1	1	1	1	1	1	1	1	1	1	1	1	1	1	1	1	1	1	1	1	1	1	1	1	1	1	1	1	1
95	YDR034W-B	YDR034W-B	156	Uncharacterized	-	-	1	1	1	1	1	1	1	1	1	1	1	1	P	1	1	1	1	1	1	1	1	1	1	1	1	1	1	1	1	1	1	1	1	1	1	1	1	1	1	1	1	1	1
96	YDR036C	EHD3	1503	Verified	Yes. mosaic > wine/European sake > wine/European West African > wine/European (> signifies more introgression)	-	1	1	1	s	1	s	s	1	1	1	s	1	1	s	s	1	1	1	1	1	s	1	s	1	1	1	1	1	1	1	s	s	s	s	s	s	1	1	s	s	s	s	s
97	YDR037W	KRS1	1776	Verified	Yes. mosaic > wine/European sake > wine/European West African > wine/European (> signifies more introgression)	-	1	1	1	s	1	s	s	1	1	1	s	1	1	s	s	1	1	1	1	1	s	1	s	1	1	1	1	1	s	1	s	s	s	1	s	s	1	1	s	s	s	s	s
98	YDR051C	DET1	1005	Verified	-	-	P	1	1	1	1	1	1	1	1	1	1	1	P	1	1	1	1	1	1	1	1	1	1	1	1	1	1	1	1	1	1	1	1	1	1	1	1	1	1	1	1	1	1
99	YDR052C	DBF4	2115	Verified	-	-	P	1	1	1	1	1	1	1	1	1	1	1	P	1	1	1	1	1	1	1	1	1	1	1	1	1	1	1	1	1	1	1	1	1	1	1	1	1	1	1	1	1	1
100	YDR054C	CDC34	888	Verified	-	-	P	1	1	1	1	1	1	1	1	1	1	1	P	1	1	1	1	1	1	1	1	1	1	1	1	1	1	1	1	1	1	1	1	1	1	1	1	1	1	1	1	1	1
101	YDR055W	PST1	1335	Verified	-	-	P	1	1	1	1	1	1	1	1	1	1	1	P	1	1	1	1	1	1	1	1	1	1	1	1	1	1	1	1	1	1	1	1	1	1	1	1	1	1	1	1	1	1
102	YDR056C	YDR056C	618	Uncharacterized	-	-	P	1	1	1	1	1	1	1	1	1	1	1	P	1	1	1	1	1	1	1	1	1	1	1	1	1	1	1	1	1	1	1	1	1	1	1	1	1	1	1	1	1	1
103	YDR057W	YOS9	1629	Verified	-	-	P	1	1	1	1	1	1	1	1	1	1	1	P	1	1	1	1	1	1	1	1	1	1	1	1	1	1	1	1	1	1	1	1	1	1	1	1	1	1	1	1	1	1
104	YDR058C	TGL2	981	Verified	-	-	P	1	1	1	1	1	1	1	1	1	1	1	P	1	1	1	1	1	1	1	1	1	1	1	1	1	1	1	1	1	1	1	1	1	1	1	1	1	1	1	1	1	1
105	YDR059C	UBC5	537	Verified	-	-	P	1	1	1	1	1	1	1	1	1	1	1	P	1	1	1	1	1	1	1	1	1	1	1	1	1	1	1	1	1	1	1	1	1	1	1	1	1	1	1	1	1	1
106	YDR077W	SED1	1017	Verified	-	-	1	1	1	1	1	1	1	1	1	1	1	s	1	1	1	1	1	1	1	1	1	1	1	1	1	1	1	1	1	1	1	1	1	1	1	1	1	1	1	1	1	1	1
107	YDR249C	YDR249C	1122	Uncharacterized	-	-	1	1	1	1	1	1	1	1	1	1	1	1	s	1	1	1	1	1	1	1	1	1	1	1	1	1	1	1	1	1	1	1	1	1	1	1	1	1	1	1	1	1	1
108	YDR251W	PAM1	2493	Verified	-	-	1	1	1	1	1	1	1	1	1	1	1	1	s	1	1	1	1	1	1	1	1	1	1	1	1	1	1	1	1	1	1	1	1	1	1	1	1	1	1	1	1	1	1
109	YDR257C	RKM4	1485	Verified	-	-	1	1	1	1	1	1	1	1	1	1	1	1	s	1	1	1	1	1	1	1	1	1	1	1	1	1	1	1	1	1	1	1	1	1	1	1	1	1	1	1	1	1	1
110	YDR258C	HSP78	2436	Verified	-	-	s	1	1	1	1	1	1	1	1	1	1	1	P	1	1	1	1	1	1	1	1	1	1	1	1	1	1	1	1	1	1	1	1	1	1	1	1	1	1	1	1	1	1
111	YDR259C	YAP6	1152	Verified	-	-	P	1	1	1	1	1	1	1	1	1	1	1	P	1	1	1	1	1	1	1	1	1	1	1	1	1	1	1	1	1	1	1	1	1	1	1	1	1	1	1	1	1	1
112	YDR260C	SWM1	513	Verified	-	-	P	1	1	1	1	1	1	1	1	1	1	1	P	1	1	1	1	1	1	1	1	1	1	1	1	1	1	1	1	1	1	1	1	1	1	1	1	1	1	1	1	1	1
113	YDR261C	EXG2	1689	Verified	-	-	P	1	1	1	1	1	1	1	1	1	1	1	P	1	1	1	1	1	1	1	1	1	1	1	1	1	1	1	1	1	1	1	1	1	1	1	1	1	1	1	1	1	1
114	YDR262W	YDR262W	819	Uncharacterized	-	-	P	1	1	1	1	1	1	1	1	1	1	1	P	1	1	1	1	1	1	1	1	1	1	1	1	1	1	1	1	1	1	1	1	1	1	1	1	1	1	1	1	1	1
115	YDR263C	DIN7	1293	Verified	-	-	P	1	1	1	1	1	1	1	1	1	1	1	P	1	1	1	1	1	1	1	1	1	1	1	1	1	1	1	1	1	1	1	1	1	1	1	1	1	1	1	1	1	1
116	YDR334W	SWR1	4545	Verified	-	-	s	1	1	1	1	1	1	1	1	1	1	1	s	1	1	1	1	1	1	1	1	1	1	1	1	1	1	1	1	1	1	1	1	1	1	1	1	1	1	1	1	1	1
117	YDR335W	MSN5	3675	Verified	-	-	P	1	1	1	1	1	1	1	1	1	1	1	1	1	1	1	1	1	1	1	1	1	1	1	1	1	1	1	1	1	1	1	1	1	1	1	1	1	1	1	1	1	1
118	YDR336W	YDR336W	945	Uncharacterized	-	-	P	1	1	1	1	1	1	1	1	1	1	1	1	1	1	1	1	1	1	1	1	1	1	1	1	1	1	1	1	1	1	1	1	1	1	1	1	1	1	1	1	1	1
119	YDR337W	MRPS28	861	Verified	-	-	P	1	1	1	1	1	1	1	1	1	1	1	1	1	1	1	1	1	1	1	1	1	1	1	1	1	1	1	1	1	1	1	1	1	1	1	1	1	1	1	1	1	1
120	YDR338C	YDR338C	2088	Uncharacterized	-	-	P	1	1	1	1	1	1	1	1	1	1	1	1	1	1	1	1	1	1	1	1	1	1	1	1	1	1	1	1	1	1	1	1	1	1	1	1	1	1	1	1	1	1
121	YDR339C	FCF1	570	Verified	-	-	P	1	1	1	1	1	1	1	1	1	1	1	P	1	1	1	1	1	1	1	1	1	1	1	1	1	1	1	1	1	1	1	1	1	1	1	1	1	1	1	1	1	1
122	YDR341C	YDR341C	1824	Verified	-	-	P	1	1	1	1	1	1	1	1	1	1	1	P	1	1	1	1	1	1	1	1	1	1	1	1	1	1	1	1	1	1	1	1	1	1	1	1	1	1	1	1	1	1
123	YDR346C	SVF1	1446	Verified	-	-	P	1	1	1	1	1	1	1	1	1	1	1	P	1	1	1	1	1	1	1	1	1	1	1	1	1	1	1	1	1	1	1	1	1	1	1	1	1	1	1	1	1	1
124	YDR347W	MRP1	966	Verified	-	-	P	1	1	1	1	1	1	1	1	1	1	1	P	1	1	1	1	1	1	1	1	1	1	1	1	1	1	1	1	1	1	1	1	1	1	1	1	1	1	1	1	1	1
125	YDR348C	YDR348C	1500	Uncharacterized	-	-	P	1	1	1	1	1	1	1	1	1	1	1	P	1	1	1	1	1	1	1	1	1	1	1	1	1	1	1	1	1	1	1	1	1	1	1	1	1	1	1	1	1	1
126	YDR349C	YPS7	1791	Verified	-	-	1	1	1	1	1	1	1	1	1	1	1	1	s	1	1	1	1	1	1	1	1	1	1	1	1	1	1	1	1	1	1	1	1	1	1	1	1	1	1	1	1	1	1
127	YDR398W	UTP5	1932	Verified	-	-	P	1	1	1	1	1	1	1	1	1	1	1	P	1	1	1	1	1	1	1	1	1	1	1	1	1	1	1	1	1	1	1	1	1	1	1	1	1	1	1	1	1	1
128	YDR399W	HPT1	666	Verified	-	-	P	1	1	1	1	1	1	1	1	1	1	1	P	1	1	1	1	1	1	1	1	1	1	1	1	1	1	1	1	1	1	1	1	1	1	1	1	1	1	1	1	1	1
129	YDR400W	URH1	1023	Verified	-	-	P	1	1	1	1	1	1	1	1	1	1	1	P	1	1	1	1	1	1	1	1	1	1	1	1	1	1	1	1	1	1	1	1	1	1	1	1	1	1	1	1	1	1
130	YDR402C	DIT2	1470	Verified	-	-	P	1	1	1	1	1	1	1	1	1	1	1	P	1	1	1	1	1	1	1	1	1	1	1	1	1	1	1	1	1	1	1	1	1	1	1	1	1	1	1	1	1	1
131	YDR510W	SMT3	306	Verified	-	-	1	1	1	1	1	1	1	1	1	1	1	1	1	1	1	1	1	1	1	1	1	1	1	1	1	1	1	1	1	1	1	1	1	P	1	1	1	1	1	1	1	1	1
132	YDR517W	GRH1	1119	Verified	-	-	s	1	1	1	1	1	1	1	1	1	1	1	s	1	1	1	1	1	1	1	1	1	1	1	1	1	1	1	1	1	1	1	1	1	1	1	1	1	1	1	1	1	1
133	YDR518W	EUG1	1554	Verified	-	-	P	1	1	1	1	1	1	1	1	1	1	1	P	1	1	1	1	1	1	1	1	1	1	1	1	1	1	1	1	1	1	1	1	1	1	1	1	1	1	1	1	1	1
134	YDR519W	FPR2	408	Verified	-	-	P	1	1	1	1	1	1	1	1	1	1	1	P	1	1	1	1	1	1	1	1	1	1	1	1	1	1	1	1	1	1	1	1	1	1	1	1	1	1	1	1	1	1
135	YDR520C	URC2	2319	Uncharacterized	-	-	P	1	1	1	1	1	1	1	1	1	1	1	P	1	1	1	1	1	1	1	1	1	1	1	1	1	1	1	1	1	1	1	1	1	1	1	1	1	1	1	1	1	1
136	YDR522C	SPS2	1509	Verified	-	-	P	1	1	1	1	1	1	1	1	1	1	1	P	1	1	1	1	1	1	1	1	1	1	1	1	1	1	1	1	1	1	1	1	1	1	1	1	1	1	1	1	1	1
137	YDR523C	SPS1	1473	Verified	-	-	P	1	1	1	1	1	1	1	1	1	1	1	1	1	1	1	1	1	1	1	1	1	1	1	1	1	1	1	1	1	1	1	1	1	1	1	1	1	1	1	1	1	1
138	YDR524C	AGE1	1449	Verified	-	-	P	1	1	1	1	1	1	1	1	1	1	1	P	1	1	1	1	1	1	1	1	1	1	1	1	1	1	1	1	1	1	1	1	1	1	1	1	1	1	1	1	1	1
139	YDR525W-A	SNA2	240	Verified	-	-	P	1	1	1	1	1	1	1	1	1	1	1	P	1	1	1	1	1	1	1	1	1	1	1	1	1	1	1	1	1	1	1	1	1	1	1	1	1	1	1	1	1	1
140	YDR527W	RBA50	1320	Verified	-	-	P	1	1	1	1	1	1	1	1	1	1	1	P	1	1	1	1	1	1	1	1	1	1	1	1	1	1	1	1	1	1	1	1	1	1	1	1	1	1	1	1	1	1
141	YDR528W	HLR1	1272	Verified	-	-	P	1	1	1	1	1	1	1	1	1	1	1	P	1	1	1	1	1	1	1	1	1	1	1	1	1	1	1	1	1	1	1	1	1	1	1	1	1	1	1	1	1	1
142	YDR529C	QCR7	384	Verified	-	-	P	1	1	1	1	1	1	1	1	1	1	1	P	1	1	1	1	1	1	1	1	1	1	1	1	1	1	1	1	1	1	1	1	1	1	1	1	1	1	1	1	1	1
143	YDR530C	APA2	978	Verified	-	-	P	1	1	1	1	1	1	1	1	1	1	1	P	1	1	1	1	1	1	1	1	1	1	1	1	1	1	1	1	1	1	1	1	1	1	1	1	1	1	1	1	1	1
144	YDR531W	CAB1	1104	Verified	-	-	P	1	1	1	1	1	1	1	1	1	1	1	P	1	1	1	1	1	1	1	1	1	1	1	1	1	1	1	1	1	1	1	1	1	1	1	1	1	1	1	1	1	1
145	YDR532C	KRE28	1158	Verified	-	-	P	1	1	1	1	1	1	1	1	1	1	1	P	1	1	1	1	1	1	1	1	1	1	1	1	1	1	1	1	1	1	1	1	1	1	1	1	1	1	1	1	1	1
146	YDR533C	HSP31	714	Verified	-	-	P	1	1	1	1	1	1	1	1	1	1	1	P	1	1	1	1	1	1	1	1	1	1	1	1	1	1	1	1	1	1	1	1	1	1	1	1	1	1	1	1	1	1
147	YEL061C	CIN8	3003	Verified	-	-	s	1	1	1	1	1	1	1	1	1	1	1	s	1	1	1	1	1	1	1	1	1	1	1	1	1	1	1	1	1	1	1	1	1	1	1	1	1	1	1	1	1	1
148	YEL062W	NPR2	1848	Verified	-	-	P	1	1	1	1	1	1	1	1	1	1	1	P	1	1	1	1	1	1	1	1	1	1	1	1	1	1	1	1	1	1	1	1	1	1	1	1	1	1	1	1	1	1
149	YEL063C	CAN1	1773	Verified	-	-	P	1	1	1	1	1	1	1	1	1	1	1	P	1	1	1	1	1	1	1	1	1	1	1	1	1	1	1	1	1	1	1	1	1	1	1	1	1	1	1	1	1	1
150	YEL064C	AVT2	1443	Verified	-	-	P	1	1	1	1	1	1	1	1	1	1	1	P	1	1	1	1	1	1	1	1	1	1	1	1	1	1	1	1	1	1	1	1	1	1	1	1	1	1	1	1	1	1
151	YEL065W	SIT1	1887	Verified	-	-	P	1	1	1	1	1	1	1	1	1	1	1	P	1	1	1	1	1	1	1	1	1	1	1	1	1	1	1	1	1	1	1	1	1	1	1	1	1	1	1	1	1	1
152	YEL066W	HPA3	540	Verified	-	-	P	1	1	1	1	1	1	1	1	1	1	1	P	1	1	1	1	1	1	1	1	1	1	1	1	1	1	1	1	1	1	1	1	1	1	1	1	1	1	1	1	1	1
153	YEL067C	YEL067C	588	Uncharacterized	-	-	P	1	1	1	1	1	1	1	1	1	1	1	P	1	1	1	1	1	1	1	1	1	1	1	1	1	1	1	1	1	1	1	1	1	1	1	1	1	1	1	1	1	1
154	YER008C	SEC3	4011	Verified	-	-	P	1	1	1	1	1	1	1	1	1	1	1	P	1	1	1	1	1	1	1	1	1	1	1	1	1	1	1	1	1	1	1	1	1	1	1	1	1	1	1	1	1	1
155	YER009W	NTF2	378	Verified	-	-	P	1	1	1	1	1	1	1	1	1	1	1	P	1	1	1	1	1	1	1	1	1	1	1	1	1	1	1	1	1	1	1	1	1	1	1	1	1	1	1	1	1	1
156	YER010C	YER010C	705	Verified	-	-	P	1	1	1	1	1	1	1	1	1	1	1	P	1	1	1	1	1	1	1	1	1	1	1	1	1	1	1	1	1	1	1	1	1	1	1	1	1	1	1	1	1	1
157	YER011W	TIR1	765	Verified	-	-	0	s	1	1	s	1	1	1	1	1	1	s	s	1	1	s	1	1	s	1	1	1	1	s	1	s	1	s	1	1	s	s	s	s	s	1	1	1	1	1	s	1	s
158	YER012W	PRE1	597	Verified	-	-	P	1	1	1	1	1	1	1	1	1	1	1	P	1	1	1	1	1	1	1	1	1	1	1	1	1	1	1	1	1	1	1	1	1	1	1	1	1	1	1	1	1	1
159	YER059W	PCL6	1263	Verified	-	-	P	1	1	1	1	1	1	1	1	1	1	1	P	1	1	1	1	1	1	1	1	1	1	1	1	1	1	1	1	1	1	1	1	1	1	1	1	1	1	1	1	1	1
160	YER060W	FCY21	1587	Verified	-	-	P	1	1	1	1	1	1	1	1	1	1	1	P	1	1	1	1	1	1	1	1	1	1	1	1	1	1	1	1	1	1	1	1	1	1	1	1	1	1	1	1	1	1
161	YER061C	CEM1	1329	Verified	-	-	P	1	1	1	1	1	1	1	1	1	1	1	P	1	1	1	1	1	1	1	1	1	1	1	1	1	1	1	1	1	1	1	1	1	1	1	1	1	1	1	1	1	1
162	YER062C	HOR2	753	Verified	-	-	P	1	1	1	1	1	1	1	1	1	1	1	P	1	1	1	1	1	1	1	1	1	1	1	1	1	1	1	1	1	1	1	1	1	1	1	1	1	1	1	1	1	1
163	YER063W	THO1	657	Verified	-	-	P	1	1	1	1	1	1	1	1	1	1	1	P	1	1	1	1	1	1	1	1	1	1	1	1	1	1	1	1	1	1	1	1	1	1	1	1	1	1	1	1	1	1
164	YER064C	YER064C	1518	Uncharacterized	-	-	P	1	1	1	1	1	1	1	1	1	1	1	P	1	1	1	1	1	1	1	1	1	1	1	1	1	1	1	1	1	1	1	1	1	1	1	1	1	1	1	1	1	1
165	YER065C	ICL1	1674	Verified	-	-	P	1	1	1	1	1	1	1	1	1	1	1	P	1	1	1	1	1	1	1	1	1	1	1	1	1	1	1	1	1	1	1	1	1	1	1	1	1	1	1	1	1	1
166	YER067W	RGI1	486	Verified	-	-	P	1	1	1	1	1	1	1	1	1	1	1	P	1	1	1	1	1	1	1	1	1	1	1	1	1	1	1	1	1	1	1	1	1	1	1	1	1	1	1	1	1	1
167	YER073W	ALD5	1563	Verified	-	-	P	1	1	1	1	1	1	1	1	1	1	1	P	1	1	1	1	1	1	1	1	1	1	1	1	1	1	1	1	1	1	1	1	1	1	1	1	1	1	1	1	1	1
168	YER076C	YER076C	909	Uncharacterized	-	-	P	1	1	1	1	1	1	1	1	1	1	1	P	1	1	1	1	1	1	1	1	1	1	1	1	1	1	1	1	1	1	1	1	1	1	1	1	1	1	1	1	1	1
169	YER162C	RAD4	2265	Verified	-	-	1	1	1	1	1	1	1	1	1	1	1	1	P	1	1	1	1	1	1	1	1	1	1	1	1	1	1	1	1	1	1	1	1	1	1	1	1	1	1	1	1	1	1
170	YER163C	YER163C	699	Uncharacterized	-	-	1	1	1	1	1	1	1	1	1	1	1	1	P	1	1	1	1	1	1	1	1	1	1	1	1	1	1	1	1	1	1	1	1	1	1	1	1	1	1	1	1	1	1
171	YER164W	CHD1	4407	Verified	-	-	1	1	1	1	1	1	1	1	1	1	1	1	P	1	1	1	1	1	1	1	1	1	1	1	1	1	1	1	1	1	1	1	1	1	1	1	1	1	1	1	1	1	1
172	YER167W	BCK2	2556	Verified	-	-	s	1	1	1	1	1	1	1	1	1	1	1	s	1	1	1	1	1	1	1	1	1	1	1	1	1	1	1	1	1	1	1	1	1	1	1	1	1	1	1	1	1	1
173	YER168C	CCA1	1641	Verified	-	-	P	1	1	1	1	1	1	1	1	1	1	1	P	1	1	1	1	1	1	1	1	1	1	1	1	1	1	1	1	1	1	1	1	1	1	1	1	1	1	1	1	1	1
174	YER169W	RPH1	2391	Verified	-	-	1	1	1	1	1	1	1	1	1	1	1	1	P	1	1	1	1	1	1	1	1	1	1	1	1	1	1	1	1	1	1	1	1	1	1	1	1	1	1	1	1	1	1
175	YER170W	ADK2	678	Verified	-	-	1	1	1	1	1	1	1	1	1	1	1	1	P	1	1	1	1	1	1	1	1	1	1	1	1	1	1	1	1	1	1	1	1	1	1	1	1	1	1	1	1	1	1
176	YER171W	RAD3	2337	Verified	-	-	1	1	1	1	1	1	1	1	1	1	1	1	P	1	1	1	1	1	1	1	1	1	1	1	1	1	1	1	1	1	1	1	1	1	1	1	1	1	1	1	1	1	1
177	YER172C	BRR2	6492	Verified	-	-	1	1	1	1	1	1	1	1	1	1	1	1	s	1	1	1	1	1	1	1	1	1	1	1	1	1	1	1	1	1	1	1	1	1	1	1	1	1	1	1	1	1	1
178	YFL008W	SMC1	3678	Verified	-	-	P	1	1	1	1	1	1	1	1	1	1	1	1	1	1	1	1	1	1	1	1	1	1	1	1	1	1	1	1	1	1	1	1	1	1	1	1	1	1	1	1	1	1
179	YFL010C	WWM1	636	Verified	-	-	P	1	1	1	1	1	1	1	1	1	1	1	P	1	1	1	1	1	1	1	1	1	1	1	1	1	1	1	1	1	1	1	1	1	1	1	1	1	1	1	1	1	1
180	YFL011W	HXT10	1641	Verified	-	-	P	1	1	1	1	1	1	1	1	1	1	1	1	1	1	1	1	1	1	1	1	1	1	1	1	1	1	1	1	1	1	1	1	1	1	1	1	1	1	1	1	1	1
181	YFL017W-A	SMX2	234	Verified	-	-	1	1	1	1	1	1	1	1	1	1	1	1	P	1	1	1	1	1	1	1	1	1	1	1	1	1	1	1	1	1	1	1	1	1	1	1	1	1	1	1	1	1	1
182	YFL018C	LPD1	1500	Verified	-	-	1	1	1	1	1	1	1	1	1	1	1	1	P	1	1	1	1	1	1	1	1	1	1	1	1	1	1	1	1	1	1	1	1	1	1	1	1	1	1	1	1	1	1
183	YFL033C	RIM15	5313	Verified	-	-	1	1	1	1	1	1	1	1	1	1	1	1	P	1	1	1	1	1	1	1	1	1	1	1	1	1	1	1	1	1	1	1	1	1	1	1	1	1	1	1	1	1	1
184	YFL053W	DAK2	1776	Verified	-	-	P	1	1	1	1	1	1	1	1	1	1	0	P	1	1	0	1	1	1	1	1	1	1	1	1	1	1	1	1	1	1	0	1	1	1	1	1	1	1	1	1	1	1
185	YFL054C	YFL054C	1941	Uncharacterized	-	-	s	1	1	1	1	1	1	1	1	1	1	0	s	1	1	0	1	1	1	1	1	1	1	1	1	1	1	1	1	1	1	0	1	1	1	1	1	1	1	1	1	1	1
186	YFL055W	AGP3	1677	Verified	-	-	1	1	1	1	1	1	1	1	1	1	1	0	1	1	1	0	1	1	1	1	1	1	1	1	1	1	1	1	1	1	1	0	1	1	1	1	1	1	1	1	1	1	1
187	YFR009W	GCN20	2259	Verified	-	-	1	1	1	1	1	1	1	1	1	1	1	1	1	1	1	1	1	1	1	1	1	1	1	1	1	1	1	1	1	1	1	1	1	1	1	1	1	1	1	1	1	1	1
188	YFR049W	YMR31	372	Verified	-	-	P	1	1	1	1	1	1	1	1	1	1	1	P	1	1	1	1	1	1	1	1	1	1	1	1	1	1	1	1	1	1	1	1	1	1	1	1	1	1	1	1	1	1
189	YFR050C	PRE4	801	Verified	-	-	P	1	1	1	1	1	1	1	1	1	1	1	P	1	1	1	1	1	1	1	1	1	1	1	1	1	1	1	1	1	1	1	1	1	1	1	1	1	1	1	1	1	1
190	YFR051C	RET2	1641	Verified	-	-	1	1	1	1	1	1	1	1	1	1	1	1	P	1	1	1	1	1	1	1	1	1	1	1	1	1	1	1	1	1	1	1	1	1	1	1	1	1	1	1	1	1	1
191	YFR052W	RPN12	825	Verified	-	-	1	1	1	1	1	1	1	1	1	1	1	1	1	1	1	1	1	1	1	1	1	1	1	1	1	1	1	1	1	1	1	1	P	1	1	1	1	1	1	1	1	1	1
192	YGL007C-A	YGL007C-A	87	Uncharacterized	-	-	1	1	1	1	1	1	1	1	1	1	1	1	1	s	1	1	1	1	1	1	1	1	s	1	1	1	1	1	1	1	1	1	1	1	1	1	1	1	s	1	1	s	1
193	YGL019W	CKB1	837	Verified	-	-	1	1	1	1	1	1	1	1	1	1	1	1	P	1	1	1	1	1	1	1	1	1	1	1	1	1	1	1	1	1	1	1	1	1	1	1	1	1	1	1	1	1	1
194	YGL020C	GET1	708	Verified	-	-	1	1	1	1	1	1	1	1	1	1	1	1	P	1	1	1	1	1	1	1	1	1	1	1	1	1	1	1	1	1	1	1	1	1	1	1	1	1	1	1	1	1	1
195	YGL021W	ALK1	2283	Verified	-	-	1	1	1	1	1	1	1	1	1	1	1	1	P	1	1	1	1	1	1	1	1	1	1	1	1	1	1	1	1	1	1	1	1	1	1	1	1	1	1	1	1	1	1
196	YGL022W	STT3	2157	Verified	-	-	1	1	1	1	1	1	1	1	1	1	1	1	P	1	1	1	1	1	1	1	1	1	1	1	1	1	1	1	1	1	1	1	1	1	1	1	1	1	1	1	1	1	1
197	YGL036W	YGL036W	2730	Uncharacterized	-	-	P	1	1	1	1	1	1	1	1	1	1	1	P	1	1	1	1	1	1	1	1	1	1	1	1	1	1	1	1	1	1	1	1	1	1	1	1	1	1	1	1	1	1
198	YGL037C	PNC1	651	Verified	-	-	P	1	1	1	1	1	1	1	1	1	1	1	P	1	1	1	1	1	1	1	1	1	1	1	1	1	1	1	1	1	1	1	1	1	1	1	1	1	1	1	1	1	1
199	YGL038C	OCH1	1443	Verified	-	-	P	1	1	1	1	1	1	1	1	1	1	1	P	1	1	1	1	1	1	1	1	1	1	1	1	1	1	1	1	1	1	1	1	1	1	1	1	1	1	1	1	1	1
200	YGL039W	YGL039W	1047	Verified	-	-	P	1	1	1	1	1	1	1	1	1	1	1	P	1	1	1	1	1	1	1	1	1	1	1	1	1	1	1	1	1	1	1	1	1	1	1	1	1	1	1	1	1	1
201	YGL040C	HEM2	1029	Verified	-	-	P	1	1	1	1	1	1	1	1	1	1	1	P	1	1	1	1	1	1	1	1	1	1	1	1	1	1	1	1	1	1	1	1	1	1	1	1	1	1	1	1	1	1
202	YGL041W-A	YGL041W-A	465	Uncharacterized	-	-	P	1	1	1	1	1	1	1	1	1	1	1	P	1	1	1	1	1	1	1	1	1	1	1	1	1	1	1	1	1	1	1	1	1	1	1	1	1	1	1	1	1	1
203	YGL043W	DST1	930	Verified	-	-	P	1	1	1	1	1	1	1	1	1	1	1	P	1	1	1	1	1	1	1	1	1	1	1	1	1	1	1	1	1	1	1	1	1	1	1	1	1	1	1	1	1	1
204	YGL049C	TIF4632	2745	Verified	-	-	s	1	1	1	1	1	1	1	1	1	1	1	s	1	1	1	1	1	1	1	1	1	1	1	1	1	1	1	1	1	1	1	1	1	1	1	1	1	1	1	1	1	1
205	YGL050W	TYW3	822	Verified	-	-	P	1	1	1	1	1	1	1	1	1	1	1	P	1	1	1	1	1	1	1	1	1	1	1	1	1	1	1	1	1	1	1	1	1	1	1	1	1	1	1	1	1	1
206	YGL054C	ERV14	417	Verified	-	-	P	1	1	1	1	1	1	1	1	1	1	1	P	1	1	1	1	1	1	1	1	1	1	1	1	1	1	1	1	1	1	1	1	1	1	1	1	1	1	1	1	1	1
207	YGL255W	ZRT1	1131	Verified	Yes. Wine/European > mosaic wine/European > sake wine/European > West African (> signifies more introgression)	-	s	s	1	s	1	s	s	1	s	s	1	s	s	1	1	s	s	1	s	s	1	s	s	s	s	s	s	1	s	s	1	1	1	s	1	1	s	s	s	1	s	1	1
208	YGL260W	YGL260W	231	Uncharacterized	-	-	1	1	s	1	1	1	1	1	1	1	1	1	1	1	1	1	1	1	1	1	1	1	1	1	1	1	1	1	1	1	1	1	s	1	1	1	1	1	1	1	1	1	1
209	YGL262W	YGL262W	528	Uncharacterized	-	-	0	1	0	1	1	1	1	1	1	1	P	1	0	1	1	1	1	1	0	1	1	1	1	0	1	1	1	0	1	0	1	0	1	1	1	1	1	1	1	P	1	1	P
210	YGR285C	ZUO1	1302	Verified	-	-	1	1	1	1	1	1	1	1	1	1	1	P	1	1	1	1	1	1	1	1	1	1	1	1	1	1	1	1	1	1	1	1	1	1	1	1	1	1	1	1	1	1	1
211	YGR286C	BIO2	1128	Verified	-	-	1	1	1	1	1	1	1	1	1	1	1	P	1	1	1	1	1	1	1	1	1	1	1	1	1	1	1	1	1	1	1	1	1	1	1	1	1	1	1	1	1	1	1
212	YHL008C	YHL008C	1884	Uncharacterized	-	-	s	s	s	s	s	s	s	s	s	s	s	s	s	s	s	1	s	s	s	s	s	s	s	s	s	s	s	s	s	s	s	s	s	1	1	s	s	s	s	1	s	s	s
213	YHL029C	OCA5	2040	Uncharacterized	-	-	1	1	1	1	1	1	1	1	1	1	1	1	P	1	1	1	1	1	1	1	1	1	1	1	1	1	1	1	1	1	1	1	1	1	1	1	1	1	1	1	1	1	1
214	YHL042W	YHL042W	453	Uncharacterized	-	-	1	1	1	1	1	1	1	1	1	1	1	1	1	1	1	1	1	1	1	1	1	1	1	1	1	1	1	1	1	1	1	1	1	1	1	1	1	1	1	1	1	1	1
215	YHR042W	NCP1	2076	Verified	-	-	1	1	1	1	1	1	1	1	1	1	1	1	1	1	1	1	1	1	1	1	1	1	1	s	1	1	1	1	1	1	1	1	1	1	1	1	1	1	1	1	1	1	1
216	YHR091C	MSR1	1932	Verified	-	-	s	1	1	1	1	1	1	1	1	1	1	1	s	1	1	1	1	1	1	1	1	1	1	1	1	1	1	1	1	1	1	1	1	1	1	1	1	1	1	1	1	1	1
217	YHR092C	HXT4	1731	Verified	-	-	P	1	1	1	1	1	1	1	1	1	1	1	P	1	1	1	1	1	1	1	1	1	1	1	1	1	1	1	1	1	1	1	1	1	1	1	1	1	1	1	1	1	1
218	YHR096C	HXT5	1779	Verified	-	-	1	1	1	1	1	1	1	1	1	1	1	1	P	1	1	1	1	1	1	1	1	1	1	1	1	1	1	1	1	1	1	1	1	1	1	1	1	1	1	1	1	1	1
219	YHR097C	YHR097C	1225	Uncharacterized	-	-	P	1	1	1	1	1	1	1	1	1	1	1	P	1	1	1	1	1	1	1	1	1	1	1	1	1	1	1	1	1	1	1	1	1	1	1	1	1	1	1	1	1	1
220	YHR098C	SFB3	2790	Verified	-	-	P	1	1	1	1	1	1	1	1	1	1	1	P	1	1	1	1	1	1	1	1	1	1	1	1	1	1	1	1	1	1	1	1	1	1	1	1	1	1	1	1	1	1
221	YHR129C	ARP1	1155	Verified	-	-	1	1	1	1	1	1	1	1	1	1	1	1	P	1	1	1	1	1	1	1	1	1	1	1	1	1	1	1	1	1	1	1	1	1	1	1	1	1	1	1	1	1	1
222	YHR131C	YHR131C	2553	Uncharacterized	-	-	1	1	1	1	1	1	1	1	1	1	1	1	P	1	1	1	1	1	1	1	1	1	1	1	1	1	1	1	1	1	1	1	1	1	1	1	1	1	1	1	1	1	1
223	YHR175W	CTR2	570	Verified	-	-	P	1	1	1	1	1	1	1	1	1	1	1	1	1	1	1	1	1	1	1	1	1	1	1	1	1	1	1	1	1	1	1	1	1	1	1	1	1	1	1	1	1	1
224	YHR175W-A	YHR175W-A	150	Uncharacterized	-	-	P	1	1	1	1	1	1	1	1	1	1	1	1	1	1	1	1	1	1	1	1	1	1	1	1	1	1	1	1	1	1	1	1	1	1	1	1	1	1	1	1	1	1
225	YHR176W	FMO1	1299	Verified	-	-	P	1	1	1	1	1	1	1	1	1	1	1	1	1	1	1	1	1	1	1	1	1	1	1	1	1	1	1	1	1	1	1	1	1	1	1	1	1	1	1	1	1	1
226	YHR207C	SET5	1581	Verified	-	-	1	1	1	1	1	1	1	1	1	1	1	1	1	1	1	1	1	1	1	1	1	1	1	1	1	1	1	1	1	1	1	1	P	1	1	1	1	1	1	1	1	1	1
227	YHR208W	BAT1	1182	Verified	-	-	1	1	1	1	1	1	1	1	1	1	1	1	1	1	1	1	1	1	1	1	1	1	1	1	1	1	1	1	1	1	1	1	P	1	1	1	1	1	1	1	1	1	1
228	YHR209W	CRG1	876	Verified	-	-	1	1	1	1	1	1	1	1	1	1	1	1	1	1	1	1	1	1	1	1	1	1	1	1	1	1	1	1	1	1	1	1	P	1	1	1	1	1	1	1	1	1	1
229	YHR210C	YHR210C	1026	Uncharacterized	-	-	1	1	1	1	1	1	1	1	1	1	1	1	1	1	1	1	1	1	1	1	1	1	1	P	1	1	1	1	1	1	1	1	P	1	1	1	1	1	1	1	1	1	1
230	YIL009C-A	EST3	547	Verified	-	-	s	1	1	1	1	1	1	1	1	1	1	1	s	1	1	1	1	1	1	1	1	1	1	1	1	1	1	1	1	1	1	1	1	1	1	1	1	1	1	1	1	1	1
231	YIL010W	DOT5	648	Verified	-	-	P	1	1	1	1	1	1	1	1	1	1	1	P	1	1	1	1	1	1	1	1	1	1	1	1	1	1	1	1	1	1	1	1	1	1	1	1	1	1	1	1	1	1
232	YIL011W	TIR3	810	Verified	-	-	s	1	1	s	1	1	1	1	1	1	1	1	s	1	1	1	1	1	1	1	1	1	1	1	1	1	1	1	1	1	1	1	s	1	1	1	1	1	1	1	1	1	1
233	YIL013C	PDR11	4236	Verified	-	-	P	1	1	1	1	1	1	1	1	1	1	1	1	1	1	1	1	1	1	1	1	1	1	1	1	1	1	1	1	1	1	1	1	1	1	1	1	1	1	1	1	1	1
234	YIL014W	MNT3	1893	Verified	-	-	P	1	1	1	1	1	1	1	1	1	1	1	P	1	1	1	1	1	1	1	1	1	1	1	1	1	1	1	1	1	1	1	1	1	1	1	1	1	1	1	1	1	1
235	YIL046W	MET30	1923	Verified	-	-	P	1	1	1	1	1	1	1	1	1	1	1	1	1	1	1	1	1	1	1	1	1	1	1	1	1	1	1	1	1	1	1	1	1	1	1	1	1	1	1	1	1	1
236	YIL046W-A	YIL046W-A	165	Uncharacterized	-	-	P	1	1	1	1	1	1	1	1	1	1	1	1	1	1	1	1	1	1	1	1	1	1	1	1	1	1	1	1	1	1	1	1	1	1	1	1	1	1	1	1	1	1
237	YIL047C	SYG1	2709	Verified	-	-	P	1	1	1	1	1	1	1	1	1	1	1	1	1	1	1	1	1	1	1	1	1	1	1	1	1	1	1	1	1	1	1	1	1	1	1	1	1	1	1	1	1	1
238	YIL049W	DFG10	762	Verified	-	-	P	1	1	1	1	1	1	1	1	1	1	1	1	1	1	1	1	1	1	1	1	1	1	1	1	1	1	1	1	1	1	1	1	1	1	1	1	1	1	1	1	1	1
239	YIL050W	PCL7	858	Verified	-	-	P	1	1	1	1	1	1	1	1	1	1	1	1	1	1	1	1	1	1	1	1	1	1	1	1	1	1	1	1	1	1	1	1	1	1	1	1	1	1	1	1	1	1
240	YIL051C	MMF1	438	Verified	-	-	P	1	1	1	1	1	1	1	1	1	1	1	1	1	1	1	1	1	1	1	1	1	1	1	1	1	1	1	1	1	1	1	1	1	1	1	1	1	1	1	1	1	1
241	YIL159W	BNR1	4128	Verified	-	-	1	1	1	1	1	1	1	1	1	1	1	1	1	1	1	1	1	1	1	1	P	1	1	1	1	1	1	1	1	1	1	1	1	1	1	1	1	1	1	1	P	1	1
242	YIL160C	POT1	1254	Verified	-	-	1	1	1	1	1	1	1	1	1	1	1	1	1	1	1	1	1	1	1	1	P	1	1	1	1	1	1	1	1	1	1	1	1	1	1	1	1	1	1	1	P	1	1
243	YIL161W	YIL161W	708	Uncharacterized	-	-	1	1	1	1	1	1	1	1	1	1	1	1	1	1	1	1	1	1	1	1	P	1	1	1	1	1	1	1	1	1	1	1	1	1	1	1	1	1	1	1	P	1	1
244	YIL164C	NIT1	600	Verified	-	-	1	1	1	1	1	1	1	1	1	1	1	1	1	1	1	1	1	1	1	1	P	0	1	1	1	1	1	1	1	1	1	1	1	1	1	1	1	1	1	1	P	1	1
245	YIL165C	YIL165C	360	Uncharacterized	-	-	1	1	1	1	1	1	1	1	1	1	1	1	1	1	1	1	1	1	1	1	P	0	1	1	1	1	1	1	1	1	1	1	1	1	1	1	1	1	1	1	P	1	1
246	YIL166C	YIL166C	1629	Uncharacterized	-	-	1	1	1	1	1	1	1	1	1	1	1	1	1	1	1	1	1	1	1	1	P	0	1	1	1	1	1	1	1	1	1	1	1	1	1	1	1	1	1	1	P	1	1
247	YIR011C	STS1	960	Verified	-	-	1	1	1	1	1	1	1	1	1	1	1	1	P	1	1	1	1	1	1	1	1	1	1	1	1	1	1	1	1	1	1	1	1	1	1	1	1	1	1	1	1	1	1
248	YIR012W	SQT1	1296	Verified	-	-	1	1	1	1	1	1	1	1	1	1	1	1	P	1	1	1	1	1	1	1	1	1	1	1	1	1	1	1	1	1	1	1	1	1	1	1	1	1	1	1	1	1	1
249	YIR013C	GAT4	366	Verified	-	-	1	1	1	1	1	1	1	1	1	1	1	1	P	1	1	1	1	1	1	1	1	1	1	1	1	1	1	1	1	1	1	1	1	1	1	1	1	1	1	1	1	1	1
250	YIR014W	YIR014W	729	Uncharacterized	-	-	1	1	1	1	1	1	1	1	1	1	1	1	P	1	1	1	1	1	1	1	1	1	1	1	1	1	1	1	1	1	1	1	1	1	1	1	1	1	1	1	1	1	1
251	YIR015W	RPR2	435	Verified	-	-	1	1	1	1	1	1	1	1	1	1	1	1	P	1	1	1	1	1	1	1	1	1	1	1	1	1	1	1	1	1	1	1	1	1	1	1	1	1	1	1	1	1	1
252	YIR016W	YIR016W	798	Uncharacterized	-	-	1	1	1	1	1	1	1	1	1	1	1	1	P	1	1	1	1	1	1	1	1	1	1	1	1	1	1	1	1	1	1	1	1	1	1	1	1	1	1	1	1	1	1
253	YIR017C	MET28	564	Verified	-	-	1	1	1	1	1	1	1	1	1	1	1	1	P	1	1	1	1	1	1	1	1	1	1	1	1	1	1	1	1	1	1	1	1	1	1	1	1	1	1	1	1	1	1
254	YIR018W	YAP5	738	Verified	-	-	1	1	1	1	1	1	1	1	1	1	1	1	P	1	1	1	1	1	1	1	1	1	1	1	1	1	1	1	1	1	1	1	1	1	1	1	1	1	1	1	1	1	1
255	YJL016W	YJL016W	1686	Uncharacterized	-	-	1	1	1	1	1	1	1	1	1	1	1	1	P	1	1	1	1	1	1	1	1	1	1	1	1	1	1	1	1	1	1	1	1	1	1	1	1	1	1	1	1	1	1
256	YJL166W	QCR8	285	Verified	-	-	P	1	1	1	1	1	1	1	1	1	1	1	P	1	1	1	1	1	1	1	1	1	1	1	1	1	1	1	1	1	1	1	1	1	1	1	1	1	1	1	1	1	1
257	YJL168C	SET2	2202	Verified	-	-	P	1	1	1	1	1	1	1	1	1	1	1	P	1	1	1	1	1	1	1	1	1	1	1	1	1	1	1	1	1	1	1	1	1	1	1	1	1	1	1	1	1	1
258	YJL170C	ASG7	630	Verified	-	-	P	1	1	1	1	1	1	1	1	1	1	1	P	1	1	1	1	1	1	1	1	1	1	1	1	1	1	1	1	1	1	1	1	1	1	1	1	1	1	1	1	1	1
259	YJL171C	YJL171C	1191	Verified	-	-	P	1	1	1	1	1	1	1	1	1	1	1	P	1	1	1	1	1	1	1	1	1	1	1	1	1	1	1	1	1	1	1	1	1	1	1	1	1	1	1	1	1	1
260	YJL172W	CPS1	1731	Verified	-	-	P	1	1	1	1	1	1	1	1	1	1	1	P	1	1	1	1	1	1	1	1	1	1	1	1	1	1	1	1	1	1	1	1	1	1	1	1	1	1	1	1	1	1
261	YJL174W	KRE9	831	Verified	-	-	1	1	1	1	1	1	1	1	1	1	1	1	P	1	1	1	1	1	1	1	1	1	1	1	1	1	1	1	1	1	1	1	1	1	1	1	1	1	1	1	1	1	1
262	YJL212C	OPT1	2400	Verified	-	-	1	1	1	1	1	1	1	1	1	1	1	s	1	1	1	1	1	1	1	1	1	1	1	1	1	1	1	1	1	1	1	1	1	1	1	1	1	1	1	1	1	1	1
263	YJL213W	YJL213W	996	Verified	-	-	1	1	1	1	1	1	1	1	1	1	1	0	1	1	1	1	1	1	1	1	1	1	1	1	1	1	1	1	1	1	1	1	1	1	1	1	1	1	1	1	1	1	1
264	YJR129C	YJR129C	1020	Uncharacterized	-	-	P	1	1	1	1	1	1	1	1	1	1	1	P	1	1	1	1	1	1	1	1	1	1	1	1	1	1	1	1	1	1	1	1	1	1	1	1	1	1	1	1	1	1
265	YJR130C	STR2	1920	Verified	-	-	P	1	1	1	1	1	1	1	1	1	1	1	P	1	1	1	1	1	1	1	1	1	1	1	1	1	1	1	1	1	1	1	1	1	1	1	1	1	1	1	1	1	1
266	YJR131W	MNS1	1650	Verified	-	-	1	1	1	1	1	1	1	1	1	1	1	1	P	1	1	1	1	1	1	1	1	1	1	1	1	1	1	1	1	1	1	1	1	1	1	1	1	1	1	1	1	1	1
267	YJR143C	PMT4	2289	Verified	-	-	P	1	1	1	1	1	1	1	1	1	1	1	P	1	1	1	1	1	1	1	1	1	1	1	1	1	1	1	1	1	1	1	1	1	1	1	1	1	1	1	1	1	1
268	YJR144W	MGM101	810	Verified	-	-	P	1	1	1	1	1	1	1	1	1	1	1	P	1	1	1	1	1	1	1	1	1	1	1	1	1	1	1	1	1	1	1	1	1	1	1	1	1	1	1	1	1	1
269	YJR145C	RPS4A	1042	Verified	-	-	P	1	1	1	1	1	1	1	1	1	1	1	P	1	1	1	1	1	1	1	1	1	1	1	1	1	1	1	1	1	1	1	1	1	1	1	1	1	1	1	1	1	1
270	YJR147W	HMS2	1077	Verified	-	-	P	1	1	1	1	1	1	1	1	1	1	1	P	1	1	1	1	1	1	1	1	1	1	1	1	1	1	1	1	1	1	1	1	1	1	1	1	1	1	1	1	1	1
271	YJR148W	BAT2	1131	Verified	-	-	P	1	1	1	1	1	1	1	1	1	1	1	P	1	1	1	1	1	1	1	1	1	1	1	1	1	1	1	1	1	1	1	1	1	1	1	1	1	1	1	1	1	1
272	YJR149W	YJR149W	1215	Uncharacterized	-	-	s	1	1	1	1	1	1	1	1	1	1	1	s	1	1	1	1	1	1	1	1	1	1	1	1	1	1	1	1	1	1	1	1	1	1	1	1	1	1	1	1	1	1
273	YJR150C	DAN1	897	Verified	-	-	s	1	1	1	1	1	1	1	1	1	1	1	s	1	1	1	1	1	1	1	1	1	1	1	1	1	1	1	1	1	1	1	1	1	1	1	1	1	1	1	1	1	1
274	YKL094W	YJU3	942	Verified	-	-	P	1	1	1	1	1	1	1	1	1	1	1	P	1	1	1	1	1	1	1	1	1	1	1	1	1	1	1	1	1	1	1	1	1	1	1	1	1	1	1	1	1	1
275	YKL095W	YJU2	837	Verified	-	-	P	1	1	1	1	1	1	1	1	1	1	1	P	1	1	1	1	1	1	1	1	1	1	1	1	1	1	1	1	1	1	1	1	1	1	1	1	1	1	1	1	1	1
276	YKL096C-B	YKL096C-B	150	Uncharacterized	-	-	P	1	1	1	1	1	1	1	1	1	1	1	P	1	1	1	1	1	1	1	1	1	1	1	1	1	1	1	1	1	1	1	1	1	1	1	1	1	1	1	1	1	1
277	YKL096W	CWP1	720	Verified	-	-	P	1	1	1	1	1	1	1	1	1	1	1	P	1	1	1	1	1	1	1	1	1	1	1	1	1	1	1	1	1	1	1	1	1	1	1	1	1	1	1	1	1	1
278	YKL096W-A	CWP2	279	Verified	-	-	P	1	1	1	1	1	1	1	1	1	1	1	P	1	1	1	1	1	1	1	1	1	1	1	1	1	1	1	1	1	1	1	1	1	1	1	1	1	1	1	1	1	1
279	YKL127W	PGM1	1713	Verified	-	-	1	1	1	1	1	1	1	1	1	1	1	1	1	1	1	1	1	1	1	1	1	1	s	1	1	1	1	1	1	1	1	1	1	1	1	1	1	1	1	1	1	1	1
280	YKL128C	PMU1	888	Verified	-	-	1	1	1	1	1	1	1	1	1	1	1	1	1	1	1	1	1	1	1	1	1	1	s	1	1	1	1	1	1	1	1	1	1	1	1	1	1	1	1	1	1	1	1
281	YKL163W	PIR3	978	Verified	-	-	1	1	1	s	1	1	s	s	1	1	1	1	1	s	s	1	s	s	1	1	1	1	1	1	1	1	1	1	1	1	1	1	1	s	s	s	1	1	0	s	1	s	1
282	YKL164C	PIR1	1026	Verified	-	-	1	1	1	1	1	1	1	1	1	1	1	1	1	1	1	1	1	1	1	1	1	1	1	1	1	1	1	1	1	1	1	1	1	1	1	1	1	1	1	1	1	1	1
283	YKL185W	ASH1	1767	Verified	-	-	1	1	1	1	1	1	1	1	1	1	1	1	s	1	1	1	1	1	1	1	1	1	1	1	1	1	1	1	1	1	1	1	1	1	1	1	1	1	1	1	1	1	1
284	YKR038C	KAE1	1161	Verified	-	-	1	1	1	1	1	1	1	1	1	1	1	1	1	1	1	1	1	1	1	1	1	1	1	1	1	1	1	1	1	1	1	1	1	1	1	1	1	1	1	1	1	1	1
285	YKR039W	GAP1	1809	Verified	-	-	P	1	1	1	1	1	1	1	1	1	1	1	P	1	1	1	1	1	1	1	1	1	1	1	1	1	1	1	1	1	1	1	1	1	1	1	1	1	1	1	1	1	1
286	YKR041W	YKR041W	753	Verified	-	-	P	1	1	1	1	1	1	1	1	1	1	1	P	1	1	1	1	1	1	1	1	1	1	1	1	1	1	1	1	1	1	1	1	1	1	1	1	1	1	1	1	1	1
287	YKR042W	UTH1	1098	Verified	-	-	P	1	1	1	1	1	1	1	1	1	1	1	P	1	1	1	1	1	1	1	1	1	1	1	1	1	1	1	1	1	1	1	1	1	1	1	1	1	1	1	1	1	1
288	YKR043C	SHB17	816	Verified	-	-	P	1	1	1	1	1	1	1	1	1	1	1	P	1	1	1	1	1	1	1	1	1	1	1	1	1	1	1	1	1	1	1	1	1	1	1	1	1	1	1	1	1	1
289	YKR044W	UIP5	1332	Verified	-	-	P	1	1	1	1	1	1	1	1	1	1	1	P	1	1	1	1	1	1	1	1	1	1	1	1	1	1	1	1	1	1	1	1	1	1	1	1	1	1	1	1	1	1
290	YKR045C	YKR045C	552	Uncharacterized	-	-	P	1	1	1	1	1	1	1	1	1	1	1	P	1	1	1	1	1	1	1	1	1	1	1	1	1	1	1	1	1	1	1	1	1	1	1	1	1	1	1	1	1	1
291	YKR046C	PET10	852	Verified	-	-	P	1	1	1	1	1	1	1	1	1	1	1	P	1	1	1	1	1	1	1	1	1	1	1	1	1	1	1	1	1	1	1	1	1	1	1	1	1	1	1	1	1	1
292	YLL025W	PAU17	375	Verified	-	-	1	1	1	1	1	1	1	1	1	1	1	1	1	1	1	1	1	1	1	1	1	1	1	1	1	1	1	1	1	1	1	1	1	1	1	1	1	1	1	1	1	1	1
293	YLR078C	BOS1	824	Verified	-	-	1	1	1	1	1	1	1	1	1	1	1	1	P	1	1	1	1	1	1	1	1	1	1	1	1	1	1	1	1	1	1	1	1	1	1	1	1	1	1	1	1	1	1
294	YLR079W	SIC1	855	Verified	-	-	1	1	1	1	1	1	1	1	1	1	1	1	P	1	1	1	1	1	1	1	1	1	s	1	1	1	1	1	1	1	1	1	1	1	1	1	1	1	1	1	1	1	1
295	YLR080W	EMP46	1335	Verified	-	-	1	1	1	1	1	1	1	1	1	1	1	1	P	1	1	1	1	1	1	1	1	1	0	1	1	1	1	1	1	1	1	1	1	1	1	1	1	1	1	1	1	1	1
296	YLR081W	GAL2	1725	Verified	-	-	1	1	1	1	1	1	1	1	1	1	1	1	P	1	1	1	1	1	1	1	1	1	s	1	1	1	1	s	1	1	1	1	1	1	1	1	1	1	1	1	1	1	1
297	YLR082C	SRL2	1179	Verified	-	-	1	1	1	1	1	1	1	1	1	1	1	1	1	1	1	1	1	1	1	1	1	1	s	1	1	1	1	1	1	1	1	1	1	1	1	1	1	1	1	1	1	1	1
298	YLR084C	RAX2	3663	Verified	-	-	1	1	1	1	1	1	1	1	1	1	1	1	s	1	1	1	1	1	1	1	1	1	1	1	1	1	1	1	1	1	1	1	1	1	1	1	1	1	1	1	1	1	1
299	YLR118C	YLR118C	684	Verified	-	-	s	1	1	1	1	1	1	1	1	1	1	1	s	1	1	1	1	1	1	1	1	1	1	1	1	1	1	1	1	1	1	1	1	1	1	1	1	1	1	1	1	1	1
300	YLR119W	SRN2	642	Verified	-	-	s	1	1	1	1	1	1	1	1	1	1	1	s	1	1	1	1	1	1	1	1	1	1	1	1	1	1	1	1	1	1	1	1	1	1	1	1	1	1	1	1	1	1
301	YLR120C	YPS1	1710	Verified	-	-	s	1	1	1	1	1	1	1	1	1	1	1	s	1	1	1	1	1	1	1	1	1	1	1	1	1	1	1	1	1	1	1	1	1	1	1	1	1	1	1	1	1	1
302	YLR121C	YPS3	1527	Verified	-	-	s	1	1	1	1	1	1	1	1	1	1	1	s	1	1	1	1	1	1	1	1	1	1	1	1	1	1	1	1	1	1	1	1	1	1	1	1	1	1	1	1	1	1
303	YLR130C	ZRT2	1269	Verified	-	-	s	1	1	1	1	1	1	1	1	1	1	1	s	1	1	1	1	1	1	1	1	1	1	1	1	1	1	1	1	1	1	1	1	1	1	1	1	1	1	1	1	1	1
304	YLR193C	UPS1	528	Verified	-	-	P	1	1	1	1	1	1	1	1	1	1	1	P	1	1	1	1	1	1	1	1	1	1	1	1	1	1	1	1	1	1	1	1	1	1	1	1	1	1	1	1	1	1
305	YLR194C	YLR194C	765	Verified	-	-	P	1	1	1	1	1	1	1	1	1	1	1	P	1	1	1	1	1	1	1	1	1	1	1	1	1	1	1	1	1	1	1	1	1	1	1	1	1	1	1	1	1	1
306	YLR342W	FKS1	5631	Verified	-	-	1	1	1	1	1	1	1	1	1	1	1	1	1	s	1	1	1	1	1	1	1	1	1	1	1	1	1	1	1	1	1	1	1	1	1	s	1	1	s	1	1	s	1
307	YLR342W-A	YLR342W-A	174	Uncharacterized	-	-	1	1	1	1	1	1	1	1	1	1	1	s	1	1	1	1	1	1	1	1	1	1	1	1	1	1	1	s	1	1	1	1	s	1	1	1	1	1	1	1	1	1	1
308	YLR390W-A	CCW14	717	Verified	-	-	1	1	1	1	1	1	1	1	1	1	1	1	1	1	1	1	1	1	1	1	1	1	1	1	1	1	1	1	1	1	1	1	1	1	1	1	1	1	1	1	1	1	1
309	YLR406C-A	YLR406C-A	150	Uncharacterized	Yes. mosaic > wine/European sake > wine/European West African > wine/European (> signifies more introgression)	-	1	1	1	s	s	s	s	s	1	1	s	1	1	s	s	1	1	s	1	1	s	1	1	1	1	1	s	s	s	s	s	s	1	s	s	s	1	1	s	s	1	s	s
310	YLR450W	HMG2	3138	Verified	-	-	s	1	1	1	1	1	1	1	1	1	1	1	s	1	1	1	1	1	1	1	1	1	1	1	1	1	1	1	1	1	1	1	1	1	1	1	1	1	1	1	1	1	1
311	YLR451W	LEU3	2661	Verified	-	-	P	1	1	1	1	1	1	1	1	1	1	1	P	1	1	1	1	1	1	1	1	1	1	1	1	1	1	1	1	1	1	1	1	1	1	1	1	1	1	1	1	1	1
312	YLR452C	SST2	2097	Verified	-	-	P	1	1	1	1	1	1	1	1	1	1	1	P	1	1	1	1	1	1	1	1	1	1	1	1	1	1	1	1	1	1	1	1	1	1	1	1	1	1	1	1	1	1
313	YLR453C	RIF2	1188	Verified	-	-	P	1	1	1	1	1	1	1	1	1	1	1	P	1	1	1	1	1	1	1	1	1	1	1	1	1	1	1	1	1	1	1	1	1	1	1	1	1	1	1	1	1	1
314	YLR454W	FMP27	7887	Uncharacterized	-	-	P	1	1	1	1	1	1	1	1	1	1	1	P	1	1	1	1	1	1	1	1	1	1	1	1	1	1	1	1	1	1	1	1	1	1	1	1	1	1	1	1	1	1
315	YLR455W	YLR455W	915	Uncharacterized	-	-	1	1	1	1	1	1	1	1	1	1	1	1	P	1	1	1	1	1	1	1	1	1	1	1	1	1	1	1	1	1	1	1	1	1	1	1	1	1	1	1	1	1	1
316	YLR456W	YLR456W	615	Uncharacterized	-	-	1	1	1	1	1	1	1	1	1	1	1	1	P	1	1	1	1	1	1	1	1	1	1	1	1	1	1	1	1	1	1	1	1	1	1	1	1	1	1	1	1	1	1
317	YLR457C	NBP1	960	Verified	-	-	1	1	1	1	1	1	1	1	1	1	1	1	P	1	1	1	1	1	1	1	1	1	1	1	1	1	1	1	1	1	1	1	1	1	1	1	1	1	1	1	1	1	1
318	YLR459W	GAB1	1185	Verified	-	-	1	1	1	1	1	1	1	1	1	1	1	1	P	1	1	1	1	1	1	1	1	1	1	1	1	1	1	1	1	1	1	1	1	1	1	1	1	1	1	1	1	1	1
319	YML085C	TUB1	1460	Verified	-	-	1	1	1	1	1	1	1	1	1	1	1	1	P	1	1	1	1	1	1	1	1	1	1	1	1	1	1	1	1	1	1	1	1	1	1	1	1	1	1	1	1	1	1
320	YML086C	ALO1	1581	Verified	-	-	1	1	1	1	1	1	1	1	1	1	1	1	P	1	1	1	1	1	1	1	1	1	1	1	1	1	1	1	1	1	1	1	1	1	1	1	1	1	1	1	1	1	1
321	YML125C	PGA3	939	Verified	Yes. Mosaic > wine/European sake > wine/European West African > wine/European (> signifies more introgression)	-	1	1	1	1	1	s	1	s	1	1	s	1	1	s	s	s	s	1	1	1	s	1	s	s	1	1	1	1	1	1	s	s	1	s	s	s	1	1	1	s	1	s	s
322	YMR008C	PLB1	1995	Verified	-	-	P	1	1	1	1	1	1	1	1	1	1	1	1	1	1	1	1	1	1	1	1	1	1	1	1	1	1	1	1	1	1	1	1	1	1	1	1	1	1	1	1	1	1
323	YMR030W-A	YMR030W-A	291	Uncharacterized	-	-	P	1	1	1	1	1	1	1	1	1	1	1	P	1	1	1	1	1	1	1	1	1	1	1	1	1	1	1	1	1	1	1	1	1	1	1	1	1	1	1	1	1	1
324	YMR032W	HOF1	2010	Verified	-	-	s	1	1	1	1	1	1	1	1	1	1	1	s	1	1	1	1	1	1	1	1	1	1	1	1	1	1	1	1	1	1	1	1	1	1	1	1	1	1	1	1	1	1
325	YMR033W	ARP9	1490	Verified	-	-	P	1	1	1	1	1	1	1	1	1	1	1	P	1	1	1	1	1	1	1	1	1	1	1	1	1	1	1	1	1	1	1	1	1	1	1	1	1	1	1	1	1	1
326	YMR034C	YMR034C	1305	Uncharacterized	-	-	P	1	1	1	1	1	1	1	1	1	1	1	P	1	1	1	1	1	1	1	1	1	1	1	1	1	1	1	1	1	1	1	1	1	1	1	1	1	1	1	1	1	1
327	YMR035W	IMP2	534	Verified	-	-	P	1	1	1	1	1	1	1	1	1	1	1	P	1	1	1	1	1	1	1	1	1	1	1	1	1	1	1	1	1	1	1	1	1	1	1	1	1	1	1	1	1	1
328	YMR036C	MIH1	1665	Verified	-	-	P	1	1	1	1	1	1	1	1	1	1	1	P	1	1	1	1	1	1	1	1	1	1	1	1	1	1	1	1	1	1	1	1	1	1	1	1	1	1	1	1	1	1
329	YMR037C	MSN2	2115	Verified	-	-	P	1	1	1	1	1	1	1	1	1	1	1	P	1	1	1	1	1	1	1	1	1	1	1	1	1	1	1	1	1	1	1	1	1	1	1	1	1	1	1	1	1	1
330	YMR038C	CCS1	750	Verified	-	-	P	1	1	1	1	1	1	1	1	1	1	1	P	1	1	1	1	1	1	1	1	1	1	1	1	1	1	1	1	1	1	1	1	1	1	1	1	1	1	1	1	1	1
331	YMR039C	SUB1	879	Verified	-	-	1	1	1	1	1	1	1	1	1	1	1	1	P	1	1	1	1	1	1	1	1	1	1	1	1	1	1	1	1	1	1	1	1	1	1	1	1	1	1	1	1	1	1
332	YMR040W	YET2	483	Verified	-	-	1	1	1	1	1	1	1	1	1	1	1	1	P	1	1	1	1	1	1	1	1	1	1	1	1	1	1	1	1	1	1	1	1	1	1	1	1	1	1	1	1	1	1
333	YMR041C	ARA2	1008	Verified	-	-	1	1	1	1	1	1	1	1	1	1	1	1	P	1	1	1	1	1	1	1	1	1	1	1	1	1	1	1	1	1	1	1	1	1	1	1	1	1	1	1	1	1	1
334	YMR042W	ARG80	534	Verified	-	-	1	1	1	1	1	1	1	1	1	1	1	1	P	1	1	1	1	1	1	1	1	1	1	1	1	1	1	1	1	1	1	1	1	1	1	1	1	1	1	1	1	1	1
335	YMR043W	MCM1	861	Verified	-	-	1	1	1	1	1	1	1	1	1	1	1	1	P	1	1	1	1	1	1	1	1	1	1	1	1	1	1	1	1	1	1	1	1	1	1	1	1	1	1	1	1	1	1
336	YMR044W	IOC4	1428	Verified	-	-	1	1	1	1	1	1	1	1	1	1	1	1	s	1	1	1	1	1	1	1	1	1	1	1	1	1	1	1	1	1	1	1	1	1	1	1	1	1	1	1	1	1	1
337	YMR122W-A	YMR122W-A	255	Uncharacterized	-	-	P	1	1	1	1	1	1	1	1	1	1	1	P	1	1	1	1	1	1	1	1	1	1	1	1	1	1	1	1	1	1	1	1	1	1	1	1	1	1	1	1	1	1
338	YMR123W	PKR1	369	Verified	-	-	P	1	1	1	1	1	1	1	1	1	1	1	P	1	1	1	1	1	1	1	1	1	1	1	1	1	1	1	1	1	1	1	1	1	1	1	1	1	1	1	1	1	1
339	YMR124W	YMR124W	2832	Uncharacterized	-	-	P	1	1	1	1	1	1	1	1	1	1	1	P	1	1	1	1	1	1	1	1	1	1	1	1	1	1	1	1	1	1	1	1	1	1	1	1	1	1	1	1	1	1
340	YMR132C	JLP2	627	Uncharacterized	-	-	P	1	1	1	1	1	1	1	1	1	1	1	1	1	1	1	1	1	1	1	1	1	1	1	1	1	1	1	1	1	1	1	1	1	1	1	1	1	1	1	1	1	1
341	YMR152W	YIM1	1098	Verified	-	-	1	1	1	1	1	1	1	1	1	1	1	1	1	s	1	1	1	1	1	1	s	1	1	1	1	1	1	1	1	1	1	1	1	1	1	s	1	1	1	1	1	s	1
342	YMR158C-A	YMR158C-A	138	Uncharacterized	-	-	1	1	1	1	1	1	1	1	1	1	1	1	1	s	1	1	1	1	1	1	s	1	1	1	1	1	1	1	1	1	1	1	1	1	1	s	1	1	1	1	1	s	1
343	YMR176W	ECM5	4236	Verified	-	-	1	1	1	1	1	1	1	1	1	1	1	1	1	1	1	1	1	1	1	1	1	1	1	1	1	1	1	1	1	1	1	1	1	1	1	1	1	1	1	1	1	1	1
344	YMR177W	MMT1	1533	Verified	-	-	1	1	1	1	1	1	1	1	1	1	1	1	1	1	1	1	1	1	1	1	1	1	1	1	1	1	1	1	1	1	1	1	1	1	1	1	1	1	1	1	1	1	1
345	YMR178W	YMR178W	825	Uncharacterized	-	-	1	1	1	1	1	1	1	1	1	1	1	1	1	1	1	1	1	1	1	1	1	1	1	1	1	1	1	1	1	1	1	1	1	1	1	1	1	1	1	1	1	1	1
346	YMR179W	SPT21	2277	Verified	-	-	1	1	1	1	1	1	1	1	1	1	1	1	1	1	1	1	1	1	1	1	1	1	1	1	1	1	1	1	1	1	1	1	1	1	1	1	1	1	1	1	1	1	1
347	YMR180C	CTL1	963	Verified	-	-	1	1	1	1	1	1	1	1	1	1	1	1	1	1	1	1	1	1	1	1	1	1	1	1	1	1	1	1	1	1	1	1	1	1	1	1	1	1	1	1	1	1	1
348	YMR181C	YMR181C	465	Uncharacterized	-	-	1	1	1	1	1	1	1	1	1	1	1	1	1	1	1	1	1	1	1	1	1	1	1	1	1	1	1	1	1	1	1	1	1	1	1	1	1	1	1	1	1	1	1
349	YMR182C	RGM1	636	Verified	-	-	1	1	1	1	1	1	1	1	1	1	1	1	1	1	1	1	1	1	1	1	1	1	1	1	1	1	1	1	1	1	1	1	1	1	1	1	1	1	1	1	1	1	1
350	YMR266W	RSN1	2862	Verified	-	-	1	1	1	1	1	1	1	1	1	1	1	1	1	s	1	1	1	1	1	1	1	1	1	1	1	1	1	1	1	1	1	1	1	1	1	s	1	1	1	1	1	s	1
351	YMR307W	GAS1	1680	Verified	-	-	s	1	1	1	1	1	1	1	1	1	1	1	s	1	1	1	1	1	1	1	1	1	1	1	1	1	1	1	1	1	1	1	1	1	1	1	1	1	1	1	1	1	1
352	YNL220W	ADE12	1302	Verified	-	-	P	1	1	1	1	1	1	1	1	1	1	1	P	1	1	1	1	1	1	1	1	1	1	1	1	1	1	1	1	1	1	1	1	1	1	1	1	1	1	1	1	1	1
353	YNL269W	BSC4	396	Verified	-	-	1	1	1	1	1	1	1	1	1	1	1	1	1	s	1	1	1	1	1	1	s	1	s	s	1	1	1	1	1	1	1	1	1	1	1	s	1	1	1	s	s	s	1
354	YNR044W	AGA1	2178	Verified	-	-	1	1	1	s	1	1	1	s	1	1	1	1	1	s	1	1	1	1	1	1	s	1	s	1	1	1	1	s	s	1	1	1	1	s	s	1	1	1	1	1	1	s	s
355	YOL014W	YOL014W	375	Uncharacterized	Yes. Mosaic > wine/European sake > wine/European (> signifies more introgression)	-	1	1	1	s	s	s	1	1	1	1	1	1	1	1	s	s	s	s	1	1	1	1	1	1	1	1	1	1	1	1	s	s	1	s	1	1	1	1	1	1	1	1	1
356	YOL019W	YOL019W	1656	Uncharacterized	-	-	s	1	1	1	1	1	1	1	1	1	1	1	s	1	1	1	1	1	1	1	1	1	1	1	1	1	1	1	1	1	1	1	1	1	1	1	1	1	1	1	1	1	1
357	YOL019W-A	YOL019W-A	153	Uncharacterized	-	-	P	1	1	1	1	1	1	1	1	1	1	1	P	1	1	1	1	1	1	1	1	1	1	1	1	1	1	1	1	1	1	1	1	1	1	1	1	1	1	1	1	1	1
358	YOL038C-A	YOL038C-A	96	Uncharacterized	Yes. Mosaic > wine/European sake > wine/European (> signifies more introgression)	-	1	1	1	1	1	1	1	1	1	1	1	1	1	1	s	1	1	1	1	1	1	1	1	s	1	1	1	1	s	1	s	s	1	s	1	s	1	1	1	s	1	1	1
359	YOL084W	PHM7	2976	Verified	-	-	1	1	1	1	1	1	1	1	1	1	1	1	s	1	1	1	1	1	1	1	1	1	1	1	1	1	1	1	1	1	1	1	1	1	1	1	1	1	1	1	1	1	1
360	YOL122C	SMF1	1728	Verified	-	-	1	1	1	1	1	1	1	1	1	1	1	P	1	1	1	1	1	1	1	1	1	1	1	1	1	1	1	1	1	1	1	1	1	1	1	1	1	1	1	1	1	1	1
361	YOL123W	HRP1	1605	Verified	-	-	1	1	1	1	1	1	1	1	1	1	1	P	1	1	1	1	1	1	1	1	1	1	1	1	1	1	1	1	1	1	1	1	1	1	1	1	1	1	1	1	1	1	1
362	YOL129W	VPS68	555	Verified	-	-	1	1	1	1	1	1	1	1	1	1	1	1	1	1	1	1	1	1	1	1	1	1	1	1	1	1	P	1	1	1	1	1	P	1	1	1	1	1	1	1	1	1	1
363	YOL146W	PSF3	585	Verified	-	-	1	1	1	1	1	1	1	1	1	1	1	1	1	1	1	1	1	1	1	1	1	1	1	1	1	1	1	1	1	1	1	1	P	1	1	1	1	1	1	1	1	1	1
364	YOL147C	PEX11	711	Verified	-	-	1	1	1	1	1	1	1	1	1	1	1	1	1	1	1	1	1	1	1	1	1	1	1	1	1	1	1	1	1	1	1	1	P	1	1	1	1	1	1	1	1	1	1
365	YOL148C	SPT20	1815	Verified	-	-	1	1	1	1	1	1	1	1	1	1	1	1	1	1	1	1	1	1	1	1	1	1	1	1	1	1	1	1	1	1	1	1	P	1	1	1	1	1	1	1	1	1	1
366	YOL149W	DCP1	696	Verified	-	-	1	1	1	1	1	1	1	1	1	1	1	1	1	1	1	1	1	1	1	1	1	1	1	1	1	1	1	1	1	1	1	1	P	1	1	1	1	1	1	1	1	1	1
367	YOL151W	GRE2	1029	Verified	-	-	1	1	1	1	1	1	1	1	1	1	1	1	1	1	1	1	1	1	1	1	1	1	1	1	1	1	1	1	1	1	1	1	P	1	1	1	1	1	1	1	1	1	1
368	YOL152W	FRE7	1863	Verified	-	-	1	1	1	1	1	1	1	1	1	1	1	1	1	1	1	1	1	1	1	1	1	1	1	1	1	1	1	1	1	1	1	1	P	1	1	1	1	1	1	1	1	1	1
369	YOL154W	ZPS1	750	Verified	-	-	1	1	1	1	1	1	1	1	1	1	1	1	1	1	1	1	1	1	1	1	1	1	1	1	1	1	1	1	1	1	1	1	s	1	1	1	1	1	1	1	1	1	1
370	YOR009W	TIR4	1464	Verified	-	-	1	1	1	1	1	1	1	1	1	1	1	1	1	1	1	1	1	1	1	1	1	1	1	1	1	1	1	s	1	1	1	1	1	1	1	1	1	1	1	1	1	1	1
371	YOR010C	TIR2	756	Verified	-	-	1	1	1	1	1	1	1	1	1	1	1	1	1	1	1	1	1	1	1	1	1	s	1	1	1	1	1	1	1	1	1	1	1	1	1	1	1	1	1	1	1	1	1
372	YOR086C	TCB1	3561	Verified	-	-	s	1	1	1	1	1	1	1	1	1	1	1	1	1	1	1	1	1	1	1	1	1	1	1	1	1	1	1	1	1	1	1	1	1	1	1	1	1	1	1	1	1	1
373	YOR153W	PDR5	4536	Verified	-	Yes. Greater introgression among clinical strains	1	1	1	s	s	s	1	1	1	1	1	1	1	1	s	1	1	s	1	1	1	1	1	1	1	1	1	1	1	1	1	1	1	1	1	1	1	1	1	1	1	1	1
374	YOR293C-A	YOR293C-A	150	Uncharacterized	-	-	0	s	1	0	1	1	1	1	1	1	s	0	0	1	1	0	0	1	1	1	1	1	1	0	0	0	1	1	1	1	1	1	1	1	1	1	1	1	1	1	1	1	s
375	YOR341W	RPA190	4995	Verified	-	-	P	1	1	1	1	1	1	1	1	1	1	1	P	1	1	1	1	1	1	1	1	1	1	1	1	1	1	1	1	1	1	1	1	1	1	1	1	1	1	1	1	1	1
376	YOR342C	YOR342C	960	Uncharacterized	-	-	P	1	1	1	1	1	1	1	1	1	1	1	P	1	1	1	1	1	1	1	1	1	1	1	1	1	1	1	1	1	1	1	1	1	1	1	1	1	1	1	1	1	1
377	YOR344C	TYE7	876	Verified	-	-	P	1	1	1	1	1	1	1	1	1	1	1	P	1	1	1	1	1	1	1	1	1	1	1	1	1	1	1	1	1	1	1	1	1	1	1	1	1	1	1	1	1	1
378	YOR378W	YOR378W	1548	Uncharacterized	-	-	P	1	1	1	1	1	1	1	1	1	1	1	P	1	1	1	1	1	1	1	1	1	1	1	1	1	1	1	1	1	1	1	1	1	1	1	1	1	1	1	1	1	1
379	YOR382W	FIT2	462	Verified	-	-	0	1	1	1	1	1	1	0	1	1	1	1	0	1	1	0	1	1	1	1	1	1	1	1	1	0	1	1	1	1	0	1	1	1	1	1	1	1	1	1	1	1	1
380	YOR383C	FIT3	615	Verified	-	-	0	1	1	1	0	1	1	0	1	1	0	1	0	1	1	0	1	1	1	1	1	1	1	1	1	0	1	1	1	1	0	1	1	1	1	1	1	1	1	1	1	1	0
381	YPL030W	TRM44	1704	Verified	-	-	1	1	1	1	1	1	1	1	1	1	1	1	P	1	1	1	1	1	1	1	1	1	1	1	1	1	1	1	1	1	1	1	1	1	1	1	1	1	1	1	1	1	1
382	YPL031C	PHO85	1020	Verified	-	-	1	1	1	1	1	1	1	1	1	1	1	1	P	1	1	1	1	1	1	1	1	1	1	1	1	1	1	1	1	1	1	1	1	1	1	1	1	1	1	1	1	1	1
383	YPL032C	SVL3	2478	Verified	-	-	1	1	1	1	1	1	1	1	1	1	1	1	P	1	1	1	1	1	1	1	1	1	1	1	1	1	1	1	1	1	1	1	1	1	1	1	1	1	1	1	1	1	1
384	YPL088W	YPL088W	1029	Uncharacterized	-	-	1	1	1	1	1	1	1	1	1	1	1	1	1	1	1	1	1	1	1	1	1	1	s	1	1	1	1	1	1	1	1	1	1	1	1	1	1	1	1	1	1	1	1
385	YPL257W	YPL257W	582	Uncharacterized	-	-	1	P	1	P	1	P	1	1	1	0	P	0	1	P	0	1	1	1	0	1	1	0	P	P	1	0	P	0	P	1	1	1	0	P	P	0	1	1	P	0	0	P	P
386	YPR071W	YPR071W	636	Uncharacterized	-	-	1	1	1	1	1	1	1	1	1	1	1	1	1	1	1	s	1	1	1	1	1	1	1	1	1	1	s	1	1	1	s	s	1	1	1	1	1	1	s	1	1	1	1
387	YPR143W	RRP15	753	Verified	-	-	P	1	1	1	1	1	1	1	1	1	1	1	1	1	1	1	1	1	1	1	1	1	1	1	1	1	1	1	1	1	1	1	1	1	1	1	1	1	1	1	1	1	1
388	YPR144C	NOC4	1659	Verified	-	-	P	1	1	1	1	1	1	1	1	1	1	1	1	1	1	1	1	1	1	1	1	1	1	1	1	1	1	1	1	1	1	1	1	1	1	1	1	1	1	1	1	1	1
389	YPR145C-A	YPR145C-A	237	Uncharacterized	-	-	P	1	1	1	1	1	1	1	1	1	1	1	1	1	1	1	1	1	1	1	1	1	1	1	1	1	1	1	1	1	1	1	1	1	1	1	1	1	1	1	1	1	1
390	YPR145W	ASN1	1719	Verified	-	-	P	1	1	1	1	1	1	1	1	1	1	1	1	1	1	1	1	1	1	1	1	1	1	1	1	1	1	1	1	1	1	1	1	1	1	1	1	1	1	1	1	1	1
391	YPR147C	YPR147C	915	Uncharacterized	-	-	P	1	1	1	1	1	1	1	1	1	1	1	1	1	1	1	1	1	1	1	1	1	1	1	1	1	1	1	1	1	1	1	1	1	1	1	1	1	1	1	1	1	1
392	YPR148C	YPR148C	1308	Verified	-	-	P	1	1	1	1	1	1	1	1	1	1	1	1	1	1	1	1	1	1	1	1	1	1	1	1	1	1	1	1	1	1	1	1	1	1	1	1	1	1	1	1	1	1
393	YPR149W	NCE102	522	Verified	-	-	P	1	1	1	1	1	1	1	1	1	1	1	1	1	1	1	1	1	1	1	1	1	1	1	1	1	1	1	1	1	1	1	1	1	1	1	1	1	1	1	1	1	1
394	YPR151C	SUE1	621	Verified	-	-	P	1	1	1	1	1	1	1	1	1	1	1	1	1	1	1	1	1	1	1	1	1	1	1	1	1	1	1	1	1	1	1	1	1	1	1	1	1	1	1	1	1	1
395	YPR152C	URN1	1398	Verified	-	-	P	1	1	1	1	1	1	1	1	1	1	1	1	1	1	1	1	1	1	1	1	1	1	1	1	1	1	1	1	1	1	1	1	1	1	1	1	1	1	1	1	1	1
396	YPR153W	YPR153W	557	Verified	-	-	P	1	1	1	1	1	1	1	1	1	1	1	1	1	1	1	1	1	1	1	1	1	1	1	1	1	1	1	1	1	1	1	1	1	1	1	1	1	1	1	1	1	1
397	YPR154W	PIN3	648	Verified	-	-	P	1	1	1	1	1	1	1	1	1	1	1	1	1	1	1	1	1	1	1	1	1	1	1	1	1	1	1	1	1	1	1	1	1	1	1	1	1	1	1	1	1	1
398	YPR155C	NCA2	1851	Verified	-	-	P	1	1	1	1	1	1	1	1	1	1	1	1	1	1	1	1	1	1	1	1	1	1	1	1	1	1	1	1	1	1	1	1	1	1	1	1	1	1	1	1	1	1
399	YPR156C	TPO3	1869	Verified	-	-	P	1	1	1	1	1	1	1	1	1	1	1	1	1	1	1	1	1	1	1	1	1	1	1	1	1	1	1	1	1	1	1	1	1	1	1	1	1	1	1	1	1	1
400	YPR157W	TDA6	1404	Uncharacterized	-	-	s	1	1	1	1	1	1	1	1	1	1	1	1	1	1	1	1	1	1	1	1	1	1	1	1	1	1	1	1	1	1	1	1	1	1	1	1	1	1	1	1	1	1
401	YPR196W	YPR196W	1413	Uncharacterized	-	-	1	1	1	1	1	1	1	1	1	1	1	1	1	1	1	1	1	1	1	1	1	1	1	1	1	1	1	1	1	1	1	1	1	1	1	1	1	1	1	1	1	1	1
402	KHS(AAFW02000048.1)	KHS(AAFW02000048.1)	1053	not in systematic sequence of S288C	-	-	1	1	P	P	P	P	P	1	P	P	1	P	1	1	P	1	P	P	P	P	1	P	1	1	P	P	1	P	1	P	1	1	1	1	1	1	P	P	1	1	P	1	1
				introgressed			214	5	3	15	6	11	8	5	3	3	9	11	244	14	23	5	7	7	4	3	15	4	24	13	5	4	7	8	9	4	9	9	26	15	10	12	3	5	10	8	13	14	11
				deleted			5	0	1	2	1	1	1	2	0	1	1	6	4	0	1	6	2	1	2	0	0	4	1	3	1	4	1	3	0	1	3	5	1	0	0	2	0	0	2	2	1	0	1
				like s288c			183	397	398	385	395	390	393	395	399	398	392	385	154	388	378	391	393	394	396	399	387	394	377	386	396	394	394	391	393	397	390	388	375	387	392	388	399	397	390	392	388	388	390
[truncated: 52 more columns]

## Sheet: (B) Deleted genes
List of genes that are introgressed, or putatively introgressed, deleted, and novel in one or more of the 93 strains. (B) Deleted genes relative to S288c. This list does not include subtelomeric and duplicated genes. (1) denotes the presence of the gene, (0) denotes the absence. In addition, those genes that are detected as intogressed are denoted in the same way as Table S7 (A).
Number	Systematic Name	Gene Name	Length	Feature Type	YJM1078	YJM1083	YJM1129	YJM1133	YJM1190	YJM1199	YJM1202	YJM1208	YJM1242	YJM1244	YJM1248	YJM1250	YJM1252	YJM1273	YJM1304	YJM1307	YJM1311	YJM1326	YJM1332	YJM1336	YJM1338	YJM1341	YJM1342	YJM1355	YJM1356	YJM1381	YJM1383	YJM1385	YJM1386	YJM1387	YJM1388	YJM1389	YJM1399	YJM1400	YJM1401	YJM1402	YJM1415	YJM1417	YJM1418	YJM1419	YJM1433	YJM1434	YJM1439	YJM1443	YJM1444
1	YAR028W	YAR028W	705	Uncharacterized	1	1	1	0	1	0	0	1	1	1	1	1	1	1	1	1	0	0	1	1	1	1	1	0	P	1	0	0	P	1	0	0	P	1	1	0	1	P	0	0	1	1	1	1	0
2	YAR035C-A	YAR035C-A	81	Uncharacterized	1	1	1	1	1	1	1	1	1	1	1	1	1	1	1	1	1	1	1	1	1	1	1	1	1	1	1	1	1	1	1	1	0	1	1	1	1	1	1	1	1	1	1	1	1
3	YBR188C	NTC20	423	Verified	1	1	1	0	1	1	1	1	1	1	1	1	1	1	1	1	1	1	1	1	1	1	0	1	1	1	1	1	1	1	1	1	1	0	0	1	1	1	1	1	1	1	1	0	1
4	YBR296C-A	YBR296C-A	120	Uncharacterized	1	1	1	1	1	1	1	1	1	1	1	1	1	1	1	1	1	1	1	1	1	1	1	0	1	1	1	1	1	1	1	1	0	1	1	1	1	1	1	1	1	1	1	1	1
5	YCL001W-A	YCL001W-A	462	Uncharacterized	1	1	1	1	1	1	1	1	1	1	1	1	1	1	0	1	1	1	1	1	1	1	1	1	1	1	1	1	1	1	1	1	1	1	1	1	1	1	1	1	1	1	1	1	1
6	YCR089W	FIG2	4830	Verified	1	1	1	0	1	1	1	1	1	1	1	1	1	1	1	1	1	1	1	1	1	1	1	1	1	1	1	1	1	1	1	1	1	1	1	1	1	1	1	1	1	1	1	1	1
7	YCR101C	YCR101C	549	Uncharacterized	0	1	1	1	1	1	1	1	1	1	1	1	0	1	1	1	1	s	1	1	1	1	1	1	1	1	1	1	1	1	1	1	1	1	1	1	1	1	1	1	1	1	1	1	1
8	YDR540C	IRC4	540	Verified	0	1	1	1	1	1	1	1	1	1	1	1	0	1	1	1	1	1	1	1	1	1	1	1	1	1	1	1	1	1	1	1	1	1	1	1	1	1	1	1	1	1	1	1	1
9	YER011W	TIR1	765	Verified	0	s	1	1	s	1	1	1	1	1	1	s	s	1	1	s	1	1	s	1	1	1	1	s	1	s	1	s	1	1	s	s	s	s	s	1	1	1	1	1	s	1	s	1	s
10	YER134C	YER134C	537	Verified	1	1	1	1	1	1	1	1	1	1	1	1	1	1	1	1	1	1	1	1	1	1	1	1	1	1	1	1	1	1	1	1	1	1	1	1	1	1	1	1	1	1	1	1	1
11	YFL051C	YFL051C	483	Uncharacterized	1	1	1	1	1	1	1	1	1	1	1	1	1	1	1	1	1	1	1	1	1	1	1	1	1	1	1	1	1	1	1	0	1	1	1	1	1	1	1	1	1	1	1	1	1
12	YFL053W	DAK2	1776	Verified	P	1	1	1	1	1	1	1	1	1	1	0	P	1	1	0	1	1	1	1	1	1	1	1	1	1	1	1	1	1	1	0	1	1	1	1	1	1	1	1	1	1	1	1	1
13	YFL054C	YFL054C	1941	Uncharacterized	s	1	1	1	1	1	1	1	1	1	1	0	s	1	1	0	1	1	1	1	1	1	1	1	1	1	1	1	1	1	1	0	1	1	1	1	1	1	1	1	1	1	1	1	1
14	YFL055W	AGP3	1677	Verified	1	1	1	1	1	1	1	1	1	1	1	0	1	1	1	0	1	1	1	1	1	1	1	1	1	1	1	1	1	1	1	0	1	1	1	1	1	1	1	1	1	1	1	1	1
15	YFR026C	ULI1	510	Verified	1	1	1	1	1	1	1	1	1	1	1	1	1	1	1	1	1	1	1	1	1	1	1	1	1	1	1	1	1	1	1	1	0	1	1	1	1	1	1	1	1	1	1	1	1
16	YFR057W	YFR057W	456	Uncharacterized	0	0	1	0	0	0	1	1	1	1	1	1	0	0	0	1	0	1	1	1	0	1	0	1	1	1	1	1	1	1	0	0	0	0	0	0	1	1	1	1	1	0	1	0	0
17	YGL006W-A	YGL006W-A	111	Uncharacterized	1	0	1	1	1	1	1	1	1	1	1	1	1	1	1	1	1	1	1	1	1	1	1	1	1	1	1	0	1	1	0	1	1	1	1	1	1	1	1	1	1	1	1	1	1
18	YGL096W	TOS8	831	Verified	1	1	1	1	1	1	1	1	1	1	1	1	1	1	1	1	1	1	1	1	1	1	1	1	1	1	1	1	1	1	1	1	1	1	1	1	1	1	1	1	1	1	1	1	1
19	YGL262W	YGL262W	528	Uncharacterized	0	1	0	1	1	1	1	1	1	1	P	1	0	1	1	1	1	1	0	1	1	1	1	0	1	1	1	0	1	0	1	0	1	1	1	1	1	1	1	P	1	1	P	1	1
20	YGL263W	COS12	1143	Verified	0	1	0	1	1	N	1	1	1	1	1	1	0	1	1	1	1	1	0	1	1	1	1	0	1	1	1	0	1	0	1	0	1	1	1	1	1	1	1	1	1	1	1	1	1
21	YGR289C	MAL11	1851	Verified	0	1	1	1	1	1	1	0	0	1	0	0	0	1	1	1	1	1	1	1	1	0	0	0	1	0	1	0	0	1	0	0	1	0	1	1	1	1	1	1	1	1	0	1	1
22	YIL018W	RPL2B	1165	Verified	1	1	1	1	0	1	1	1	1	1	1	1	1	1	1	1	1	1	1	1	1	1	1	1	1	1	1	1	1	1	1	1	1	1	1	1	1	1	1	1	1	1	1	1	1
23	YIL164C	NIT1	600	Verified	1	1	1	1	1	1	1	1	1	1	1	1	1	1	1	1	1	1	1	1	P	0	1	1	1	1	1	1	1	1	1	1	1	1	1	1	1	1	1	1	P	1	1	1	1
24	YIL165C	YIL165C	360	Uncharacterized	1	1	1	1	1	1	1	1	1	1	1	1	1	1	1	1	1	1	1	1	P	0	1	1	1	1	1	1	1	1	1	1	1	1	1	1	1	1	1	1	P	1	1	1	1
25	YIL166C	YIL166C	1629	Uncharacterized	1	1	1	1	1	1	1	1	1	1	1	1	1	1	1	1	1	1	1	1	P	0	1	1	1	1	1	1	1	1	1	1	1	1	1	1	1	1	1	1	P	1	1	1	1
26	YIR018C-A	YIR018C-A	138	Uncharacterized	1	1	1	1	1	1	1	1	1	1	1	1	0	1	1	1	1	1	1	1	1	1	1	1	1	1	1	1	1	1	1	1	1	1	1	1	1	1	1	1	1	1	1	1	1
27	YJL020C	BBC1	3474	Verified	1	1	1	1	1	1	1	1	1	1	1	1	1	1	1	1	1	1	1	1	1	1	1	1	1	1	1	0	1	1	1	1	1	1	1	1	1	1	1	1	1	1	1	1	1
28	YJL213W	YJL213W	996	Verified	1	1	1	1	1	1	1	1	1	1	1	0	1	1	1	1	1	1	1	1	1	1	1	1	1	1	1	1	1	1	1	1	1	1	1	1	1	1	1	1	1	1	1	1	P
29	YJL217W	REE1	597	Verified	0	0	0	1	0	0	0	0	0	0	0	0	0	1	0	1	0	0	0	0	0	0	1	0	0	0	0	0	1	0	0	0	1	0	0	1	0	0	1	1	0	1	0	1	0
30	YJL218W	YJL218W	591	Uncharacterized	0	0	0	1	0	0	0	0	0	0	1	0	0	1	0	1	0	0	0	0	0	0	1	0	0	0	0	0	1	0	1	1	1	0	1	1	0	0	1	1	0	1	1	1	0
31	YKL163W	PIR3	978	Verified	1	1	1	s	1	1	s	s	1	1	1	1	1	s	s	1	s	s	1	1	1	1	1	1	1	1	1	1	1	1	1	1	1	s	s	s	1	1	0	s	1	s	1	1	1
32	YKR103W	NFT1	3657	Verified	1	1	1	1	1	1	1	1	1	1	1	1	1	1	1	0	1	1	1	1	1	1	1	1	1	1	1	1	1	1	0	1	1	1	1	1	1	1	1	1	1	1	1	1	1
33	YKR104W	YKR104W	921	Verified	1	1	1	1	1	1	1	1	1	1	1	1	1	1	1	0	1	1	1	1	1	1	1	1	1	1	1	1	1	1	0	1	1	1	1	1	1	1	1	1	1	1	1	1	1
34	YLL039C	UBI4	1146	Verified	s	1	1	1	1	1	1	1	1	1	1	1	1	1	1	1	s	1	1	1	1	1	0	1	1	s	1	s	1	1	s	1	s	1	1	1	1	1	1	1	1	1	1	1	1
35	YLL063C	AYT1	1425	Verified	1	1	0	0	1	1	1	1	0	1	1	1	1	1	0	1	1	1	1	1	1	1	1	1	1	1	0	1	1	1	1	1	1	1	1	1	1	1	1	1	1	1	1	1	1
36	YLR080W	EMP46	1335	Verified	1	1	1	1	1	1	1	1	1	1	1	1	P	1	1	1	1	1	1	1	1	1	0	1	1	1	1	1	1	1	1	1	1	1	1	1	1	1	1	1	1	1	1	1	1
37	YLR155C	ASP3-1	1089	Verified	1	0	0	0	0	0	0	0	0	0	0	0	1	0	0	0	1	0	0	0	0	0	0	0	0	0	1	0	0	0	0	0	0	0	0	0	0	0	0	0	0	0	0	0	0
38	YNL142W	MEP2	1500	Verified	1	1	1	1	1	1	1	1	1	1	1	1	1	1	1	1	1	1	1	1	1	1	1	1	1	1	1	1	1	1	1	1	1	1	1	1	0	1	1	1	1	1	1	1	1
39	YNR070W	PDR18	4002	Uncharacterized	0	1	1	1	1	1	1	1	1	1	1	1	1	1	1	1	1	1	1	1	1	1	1	1	1	1	1	1	1	1	1	1	1	1	1	1	1	1	1	1	1	1	1	1	1
40	YNR071C	YNR071C	1029	Uncharacterized	0	1	1	1	1	1	1	1	1	1	1	1	1	1	1	1	1	1	1	1	1	1	1	1	1	1	1	1	1	1	1	1	1	1	1	1	1	1	1	1	1	1	1	1	1
41	YOL152W	FRE7	1863	Verified	1	1	1	1	1	1	1	1	1	1	1	1	1	1	1	1	1	1	1	1	1	1	1	1	1	1	1	1	1	1	1	1	P	1	1	1	1	1	1	1	1	1	1	1	1
42	YOL162W	YOL162W	648	Uncharacterized	0	0	0	0	0	0	0	1	0	0	0	0	1	1	0	0	0	0	0	0	0	0	0	0	0	0	0	0	0	0	0	0	0	0	0	1	0	0	1	1	0	1	0	1	1
43	YOL163W	YOL163W	510	Uncharacterized	0	0	0	0	0	0	0	1	0	0	0	0	1	1	0	0	0	0	0	0	0	0	0	0	0	0	0	0	0	0	0	0	0	0	0	1	0	0	1	1	0	1	0	1	1
44	YOL164W	BDS1	1941	Verified	0	0	0	0	0	0	0	1	0	0	0	0	1	1	0	0	0	0	0	0	0	0	0	0	0	0	0	0	0	0	0	0	0	0	0	1	0	0	1	1	0	1	0	1	1
45	YOL164W-A	YOL164W-A	183	Uncharacterized	0	0	0	0	0	0	0	1	0	0	0	0	1	1	0	0	0	0	0	0	0	0	0	0	0	0	0	0	0	0	0	0	0	0	0	1	0	0	1	1	0	1	0	1	1
46	YOR192C	THI72	1800	Verified	1	1	1	1	1	1	1	1	1	1	1	1	1	1	1	1	1	1	1	1	1	1	1	1	1	1	1	1	1	1	1	1	1	1	1	1	1	1	1	1	1	1	1	1	1
47	YOR293C-A	YOR293C-A	150	Uncharacterized	0	s	1	0	1	1	1	1	1	1	s	0	0	1	1	0	0	1	1	1	1	1	1	0	0	0	1	1	1	1	1	1	1	1	1	1	1	1	1	1	1	1	s	1	1
48	YOR381W-A	YOR381W-A	168	Uncharacterized	0	1	1	1	1	1	1	1	1	1	1	1	0	1	1	0	1	1	1	1	1	1	1	1	1	0	1	1	1	1	1	1	1	1	1	1	1	1	1	1	1	1	1	1	1
49	YOR382W	FIT2	462	Verified	0	1	1	1	1	1	1	0	1	1	1	1	0	1	1	0	1	1	1	1	1	1	1	1	1	0	1	1	1	1	0	1	1	1	1	1	1	1	1	1	1	1	1	1	s
50	YOR383C	FIT3	615	Verified	0	1	1	1	0	1	1	0	1	1	0	1	0	1	1	0	1	1	1	1	1	1	1	1	1	0	1	1	1	1	0	1	1	1	1	1	1	1	1	1	1	1	0	1	1
51	YOR384W	FRE5	2085	Verified	0	1	1	1	1	1	1	0	1	1	1	1	0	1	1	0	1	1	1	1	1	1	1	1	1	0	1	1	1	1	1	1	1	1	1	1	1	1	1	1	1	1	1	1	1
52	YOR385W	YOR385W	873	Uncharacterized	0	1	1	1	1	1	1	1	1	1	1	1	0	1	1	0	1	1	1	1	1	1	1	1	1	0	1	1	1	1	1	1	1	1	1	1	1	1	1	1	1	1	1	1	1
53	YOR386W	PHR1	1698	Verified	0	1	1	1	1	1	1	1	1	1	1	1	0	1	1	0	1	1	1	1	1	1	1	1	1	0	1	1	1	1	1	1	1	1	1	1	1	1	1	1	1	1	1	1	1
54	YPL257W	YPL257W	582	Uncharacterized	1	P	1	P	1	P	1	1	1	0	P	0	1	P	0	1	1	1	0	1	1	0	P	P	1	0	P	0	P	1	1	1	0	P	P	0	1	1	P	0	0	P	P	0	1
55	YPR071W	YPR071W	636	Uncharacterized	1	1	1	1	1	1	1	1	1	1	1	1	1	1	1	s	1	1	1	1	1	1	1	1	1	1	s	1	1	1	s	s	1	1	1	1	1	1	s	1	1	1	1	1	1
56	YPR159C-A	YPR159C-A	102	Uncharacterized	1	1	1	1	1	1	1	1	1	1	1	1	1	1	1	1	1	1	1	1	1	1	1	1	1	1	1	1	1	1	1	1	0	1	1	1	1	1	1	1	1	1	1	1	1
57	YPR198W	SGE1	1632	Verified	1	1	1	1	1	1	1	1	1	1	1	1	1	1	1	1	1	1	1	1	1	1	1	1	1	1	1	1	1	1	1	1	1	1	1	1	1	1	1	1	1	1	1	1	1
58	YPR199C	ARR1	885	Verified	1	1	1	1	1	1	1	1	1	1	1	1	1	1	1	1	1	1	1	1	1	1	1	1	1	1	1	1	1	1	1	1	1	0	1	1	1	1	1	1	1	1	1	1	1
59	YPR200C	ARR2	393	Verified	1	1	1	1	1	1	1	1	1	1	1	1	1	1	1	1	1	1	1	1	1	1	1	1	1	1	1	1	1	1	1	1	1	0	1	1	1	1	1	1	1	1	1	1	1
60	YPR201W	ARR3	1215	Verified	1	1	1	1	1	1	1	1	1	1	1	1	1	1	1	1	1	1	1	1	1	1	1	1	1	1	1	1	1	1	1	1	1	0	1	1	1	1	1	1	1	1	1	1	1
61	VMA1_VDE1	VDE1	1360	not physically mapped	1	1	1	1	1	1	1	1	0	1	0	1	1	0	1	1	1	1	1	0	1	0	1	1	1	1	1	1	1	1	1	1	0	1	1	0	1	1	0	1	1	0	0	1	1
				Total deleted	22	9	10	10	10	8	7	7	10	8	9	14	15	3	11	17	8	7	10	8	8	13	10	12	8	16	7	13	6	9	13	14	12	13	8	4	8	7	3	2	8	3	9	4	4
[truncated: 49 more columns]

## Sheet: (C) Novel genes
List of genes that are introgressed, or putatively introgressed, deleted, and novel in one or more of the 93 strains. (C) Novel putative genes relative to S288c. These sequences are not present or not annotated in S288c. Also included are some genes previously known to be absent in S288c that are found in one or more of the 93 strains.
Seq No.	Seq ID	AA length	%ID in s288c	Align Len	Sensu Hit	%ID	Align Len	E-value (NCBI)	NCBI Best Hit	AA length	%ID, Similarity	yjm1078	yjm1083	yjm1129	yjm1133	yjm1190	yjm1199	yjm1202	yjm1208	yjm1242	yjm1244	yjm1248	yjm1250	yjm1252	yjm1273	yjm1304	yjm1307	yjm1311	yjm1326	yjm1332	yjm1336	yjm1338	yjm1341	yjm1342	yjm1355	yjm1356	yjm1381	yjm1383	yjm1385	yjm1386	yjm1387	yjm1388	yjm1389	yjm1399	yjm1400	yjm1401	yjm1402	yjm1415	yjm1417
From 93 Strains; sequence not in S288C
1	yjm1078_Chr03_2227_4428_1	733 aa	None	-	Spar6	88.51	705	0	>gb|EHN08328.1| YBL100W-B-like protein [Saccharomyces cerevisiae x Saccharomyces	Length=1127	Identities = 732/733 (99%), Positives = 732/733 (99%), Gaps = 0/733 (0%)	1	-	-	-	-	-	-	-	-	-	-	-	-	-	-	-	-	-	-	-	-	-	-	-	-	-	-	-	-	-	-	-	-	-	-	-	-	-
2	yjm1078_Chr04_1448886_1453980_2	392 aa	None	-	Spar4	98.96	192	5e-109	>gb|EHN02914.1| Fit1p [Saccharomyces cerevisiae x Saccharomyces kudriavzevii	Length=372	Identities = 220/371 (59%), Positives = 259/371 (70%), Gaps = 16/371 (4%)	1	-	-	-	-	-	-	-	-	-	-	-	1	-	-	-	-	-	-	-	-	-	-	-	-	-	-	-	-	-	-	-	-	-	-	-	-	-
3	yjm1078_Chr06_218288_229022_1	1578 aa	None	-	Spar6	98.87	888	1e-150	>gb|EEU04190.1| hypothetical protein C1Q_05664 [Saccharomyces cerevisiae JAY291]	Length=266	Identities = 221/254 (87%), Positives = 233/254 (92%), Gaps = 0/254 (0%)	1	-	-	-	-	-	-	-	-	-	-	-	1	-	-	-	-	-	-	-	-	-	-	-	-	-	-	-	-	-	-	-	-	-	-	-	-	-
4	yjm1078_Chr06_235156_238076_1	645 aa	None	-	Sarb_chr02	30.1	196	0	>gb|EGA72492.1| hypothetical protein AWRI796_5153 [Saccharomyces cerevisiae AWRI796]	Length=641	Identities = 640/641 (99%), Positives = 641/641 (100%), Gaps = 0/641 (0%)	1	-	-	-	-	-	-	-	-	-	-	-	-	-	-	-	-	-	-	-	-	1	-	-	-	-	-	-	-	-	-	-	-	-	-	-	-	-
5	yjm1078_Chr06_239484_242159_2	343 aa	None	-	Smik53	66.87	335	0	>gb|EGA72495.1| hypothetical protein AWRI796_5156 [Saccharomyces cerevisiae AWRI796]	Length=338	Identities = 338/338 (100%), Positives = 338/338 (100%), Gaps = 0/338 (0%)	1	-	-	-	-	-	-	-	-	-	-	-	-	-	-	-	-	-	-	-	-	1	-	-	-	-	-	-	-	-	-	-	-	-	-	-	-	-
6	yjm1078_Chr06_242449_247715_1	831 aa	None	-	Skud92	57.55	834	0	>gb|EGA72498.1| hypothetical protein AWRI796_5159 [Saccharomyces cerevisiae AWRI796]	Length=654	Identities = 646/647 (99%), Positives = 647/647 (100%), Gaps = 0/647 (0%)	1	-	-	-	-	-	-	-	-	-	-	-	-	-	-	-	-	-	-	-	-	1	-	-	-	-	-	-	-	-	-	-	-	-	-	-	-	-
7	yjm1078_Chr08_1671_3654_1	467 aa	None	-	Spar15	26.8	97	0	>gb|EGA72498.1| hypothetical protein AWRI796_5159 [Saccharomyces cerevisiae AWRI796]	Length=654	Identities = 646/647 (99%), Positives = 647/647 (100%), Gaps = 0/647 (0%)	1	-	-	-	-	-	-	-	-	-	-	-	-	-	-	-	-	-	-	-	-	1	-	-	-	-	-	-	-	-	-	-	-	-	-	-	-	-
8	yjm1078_Chr10_682882_689235_5	321 aa	None	-	yjm1519NODE_764_length_11105_cov_287.905548	90	140	3e-104	>gb|EEU07178.1| Dan1p [Saccharomyces cerevisiae JAY291]	Length=294	Identities = 229/281 (81%), Positives = 250/281 (89%), Gaps = 4/281 (1%)	-	-	-	-	-	-	-	-	-	-	-	-	-	-	-	-	-	-	-	-	-	-	-	-	-	-	-	-	-	-	-	-	-	-	-	-	-	-
9	yjm1078_Chr10_689393_690715_2	212 aa	None	-	Spar10	90.38	52	-	***** No hits found *****	-	-	-	-	-	-	-	-	-	-	-	-	-	-	-	-	-	-	-	-	-	-	-	-	-	-	-	-	-	-	-	-	-	-	-	-	-	-	-	-
10	yjm1078_Chr10_689393_690715_3	206 aa	None	-	yjm1524NODE_4637_length_1131_cov_6.751547	81.55	103	-	++++NoSignigicantHits++++	-	-	-	-	-	-	-	-	-	-	-	-	-	-	-	-	-	-	-	-	-	-	-	-	-	-	-	-	-	-	-	-	-	-	-	-	-	-	-	-
11	yjm1078_Chr12_309817_314304_1	361 aa	None	-	yjm1524NODE_2481_length_2280_cov_5.346930	85.23	352	0	>gb|EGA72491.1| hypothetical protein AWRI796_5152 [Saccharomyces cerevisiae AWRI796]	Length=349	Identities = 349/349 (100%), Positives = 349/349 (100%), Gaps = 0/349 (0%)	1	-	-	-	-	-	-	-	-	-	-	-	1	-	-	-	-	-	-	-	-	1	-	-	-	-	-	-	-	-	-	-	-	-	-	-	-	-
12	yjm1078_Chr12_974609_976554_4	218 aa	None	-	-	-	-	-	++++NoSignigicantHits++++	-	-	1	-	-	-	-	-	-	-	-	-	-	-	1	-	-	-	1	-	-	-	-	-	-	-	-	-	1	-	-	-	-	-	-	-	-	-	-	-
13	yjm1078_Chr12_1752166_1754835_1	399 aa	None	-	Spar12	99.5	399	0	>ref|NP_013558.3| Rif2p [Saccharomyces cerevisiae S288c]	Length=395	Identities = 298/395 (75%), Positives = 338/395 (86%), Gaps = 0/395 (0%)	1	-	-	-	-	-	-	-	-	-	-	-	1	-	-	-	-	-	-	-	-	-	-	-	-	-	-	-	-	-	-	-	-	-	-	-	-	-
14	yjm1078_Chr15_940626_941255_1	210 aa	None	-	Spar15	100	210	-	++++NoSignigicantHits++++	-	-	1	-	-	-	-	-	-	-	-	-	-	-	1	-	-	-	-	-	-	-	-	-	-	-	-	-	-	-	-	-	-	-	-	-	-	-	-	-
15	yjm1083_Chr01_163329_164757_1	262 aa	None	-	yjm1523NODE_3518_length_4526_cov_4.461113	54.09	257	9e-153	>emb|CAE52435.1| hypothetical protein [Saccharomyces cerevisiae]	Length=236	Identities = 227/236 (96%), Positives = 231/236 (98%), Gaps = 0/236 (0%)	-	1	-	-	-	-	-	1	-	-	-	-	-	-	-	-	-	-	-	-	-	-	-	-	-	-	-	-	-	-	-	-	-	-	-	-	-	-
16	yjm1083_Chr05_21587_33397_1	572 aa	None	-	yjm1524NODE_1728_length_9045_cov_6.079602	78.75	527	0	>dbj|GAA26169.1| K7_06169p [Saccharomyces cerevisiae Kyokai no. 7]	Length=532	Identities = 532/532 (100%), Positives = 532/532 (100%), Gaps = 0/532 (0%)	-	1	-	-	-	-	-	1	-	-	1	-	-	1	-	1	-	-	-	-	1	-	1	1	-	1	1	-	-	-	1	1	1	1	1	1	-	-
17	yjm1083_Chr05_21587_33397_3	295 aa	None	-	yjm1519NODE_993_length_11620_cov_307.785889	95.41	283	0	>dbj|GAA26167.1| K7_06167p [Saccharomyces cerevisiae Kyokai no. 7]	Length=275	Identities = 274/275 (99%), Positives = 274/275 (99%), Gaps = 0/275 (0%)	-	1	-	-	-	-	-	1	-	-	1	-	-	1	-	1	-	-	-	-	1	-	1	1	-	1	1	-	-	-	1	1	1	1	1	1	-	-
18	yjm1083_Chr06_253876_262199_1	176 aa	None	-	Smik48	98.86	176	2e-99	>gb|EDN60858.1| YJM-GNAT [Saccharomyces cerevisiae YJM789]	Length=145	Identities = 144/145 (99%), Positives = 144/145 (99%), Gaps = 0/145 (0%)	-	1	-	1	1	1	-	-	-	-	-	-	-	1	1	-	1	-	-	-	1	-	1	-	-	-	-	-	-	-	1	1	-	1	1	1	-	-
19	yjm1083_Chr10_703300_713918_1	1288 aa	None	-	yjm1519NODE_353_length_20724_cov_301.347565	71.88	1284	0	>emb|CAY82271.1| EC1118_1N26_0012p [Saccharomyces cerevisiae EC1118]	Length=1287	Identities = 1286/1287 (99%), Positives = 1287/1287 (100%), Gaps = 0/1287 (0%)	-	1	1	-	1	-	-	-	-	-	-	1	-	-	-	-	1	-	-	-	-	-	-	1	-	-	1	1	-	-	-	-	-	-	-	-	1	-
20	yjm1083_Chr10_703300_713918_4	510 aa	None	-	yjm1523NODE_828_length_1447_cov_5.800276	36.69	417	0	>emb|CAY82272.1| EC1118_1N26_0023p [Saccharomyces cerevisiae EC1118]	Length=503	Identities = 502/503 (99%), Positives = 502/503 (99%), Gaps = 0/503 (0%)	-	1	1	-	1	-	-	1	-	-	-	1	-	-	-	-	1	-	-	-	-	-	-	1	-	1	1	1	-	-	-	-	-	-	1	-	1	-
21	yjm1083_Chr16_66829_71178_1	405 aa	None	-	yjm1519NODE_1804_length_3834_cov_270.378723	97.78	405	0	>gb|EEU05823.1| hypothetical protein C1Q_05652 [Saccharomyces cerevisiae JAY291]	Length=372	Identities = 372/372 (100%), Positives = 372/372 (100%), Gaps = 0/372 (0%)	-	1	-	1	-	1	-	-	-	1	1	1	-	1	1	-	-	-	1	-	-	1	1	1	-	1	1	1	1	-	-	-	1	1	1	1	-	-
22	yjm1129_Chr08_1437_19163_4	394 aa	None	-	Smik162	41.03	156	0	>gb|EDV12484.1| hypothetical protein SCRG_03373 [Saccharomyces cerevisiae RM11-1a]	Length=393	Identities = 393/393 (100%), Positives = 393/393 (100%), Gaps = 0/393 (0%)	-	1	1	-	1	-	-	1	-	-	-	1	-	-	-	-	1	-	-	-	-	-	-	1	-	1	1	1	-	-	-	-	-	-	1	-	1	-
23	yjm1133_Chr01_162330_169574_2	273 aa	None	-	Spar1	94.51	273	2e-173	>gb|EDN59776.1| pheromone-regulated membrane protein [Saccharomyces cerevisiae	Length=235	Identities = 235/235 (100%), Positives = 235/235 (100%), Gaps = 0/235 (0%)	-	-	-	1	-	1	1	-	-	-	-	-	-	-	-	-	1	1	-	-	-	-	-	1	-	-	1	-	1	-	-	-	1	-	-	-	-	-
24	yjm1133_Chr01_162330_169574_3	309 aa	None	-	yjm1524NODE_12009_length_3544_cov_3.900395	93.17	322	2e-177	>gb|EDN59777.1| multicopy suppressor of sec21 [Saccharomyces cerevisiae YJM789]	Length=240	Identities = 240/240 (100%), Positives = 240/240 (100%), Gaps = 0/240 (0%)	-	-	-	1	-	1	1	-	-	-	-	-	-	-	-	-	1	1	-	-	-	-	-	1	1	-	1	-	1	-	-	-	1	-	-	-	-	1
25	yjm1133_Chr02_579350_581808_1	314 aa	None	-	Smik2	78.12	288	3e-119	>gb|EDN64797.1| gcr1 dependent translation factor [Saccharomyces cerevisiae YJM789]	Length=280	Identities = 191/275 (69%), Positives = 224/275 (81%), Gaps = 0/275 (0%)	-	-	-	1	-	-	-	-	-	-	-	-	-	-	-	-	-	-	-	-	-	-	1	-	-	-	-	-	-	-	-	-	-	1	1	-	-	-
26	yjm1133_Chr02_579350_581808_2	213 aa	None	-	Skud5	38.71	155	-	++++NoSignigicantHits++++	-	-	-	-	-	1	-	-	-	-	-	-	-	-	-	-	-	-	-	-	-	-	-	-	1	-	-	-	-	-	-	-	-	-	-	1	1	-	-	-
27	yjm1133_Chr10_28442_38308_1	169 aa	None	-	yjm1523NODE_947_length_1558_cov_4.840822	88.17	169	-	++++NoSignigicantHits++++	-	-	-	-	-	1	1	-	-	-	-	-	1	-	-	1	-	-	-	1	-	-	-	-	1	-	-	-	-	1	-	-	-	-	1	1	1	1	-	-
28	yjm1133_Chr10_28442_38308_2	545 aa	None	-	yjm1519NODE_1225_length_8002_cov_312.884644	94.31	545	0	>gb|EEU04264.1| hypothetical protein C1Q_05667 [Saccharomyces cerevisiae JAY291]	Length=544	Identities = 543/544 (99%), Positives = 544/544 (100%), Gaps = 0/544 (0%)	-	-	-	1	1	-	-	-	-	-	-	-	-	1	-	-	-	1	-	-	-	-	1	-	-	-	-	1	-	-	-	-	1	1	1	1	-	-
29	yjm1133_Chr10_28442_38308_3	565 aa	None	-	Spar6	92.57	565	0	>gb|EEU04263.1| hypothetical protein C1Q_05666 [Saccharomyces cerevisiae JAY291]	Length=556	Identities = 553/556 (99%), Positives = 553/556 (99%), Gaps = 0/556 (0%)	-	-	-	1	1	-	-	-	-	-	1	-	-	1	-	-	-	1	-	-	-	-	1	-	-	-	-	1	-	-	-	-	1	1	1	1	-	-
30	yjm1133_Chr10_28442_38308_4	642 aa	None	-	yjm1524NODE_4998_length_9295_cov_4.548574	93.6	641	0	>gb|EEU04262.1| hypothetical protein C1Q_05665 [Saccharomyces cerevisiae JAY291]	Length=636	Identities = 634/636 (99%), Positives = 635/636 (99%), Gaps = 0/636 (0%)	-	-	-	1	1	-	-	-	-	-	1	-	-	1	-	-	-	1	-	-	-	-	1	-	-	-	-	1	-	-	-	-	1	1	1	1	-	-
31	yjm1190_Chr07_4547_6941_1	556 aa	None	-	Smik12	84.78	552	0	>gb|EDN59206.1| high-affinity glutamine permease [Saccharomyces cerevisiae YJM789]	Length=556	Identities = 547/547 (100%), Positives = 547/547 (100%), Gaps = 0/547 (0%)	-	-	-	-	1	1	-	-	-	-	-	-	-	-	-	-	-	-	-	-	-	-	-	-	-	-	-	-	-	-	-	-	-	-	-	-	-	-
32	yjm1190_Chr11_319557_338193_4	424 aa	None	-	Skud29	32.81	64	0	>gb|EEU07465.1| hypothetical protein C1Q_05653 [Saccharomyces cerevisiae JAY291]	Length=426	Identities = 406/412 (99%), Positives = 407/412 (99%), Gaps = 0/412 (0%)	-	-	-	-	1	-	-	-	-	-	-	-	-	-	-	-	-	-	-	-	-	-	-	-	-	-	1	1	-	-	-	-	-	-	-	-	1	-
33	yjm1199_Chr10_3206_3997_1	261 aa	None	-	Smik19	68.97	261	0	>dbj|GAA24511.1| K7_11205p [Saccharomyces cerevisiae Kyokai no. 7]	Length=262	Identities = 257/258 (99%), Positives = 257/258 (99%), Gaps = 0/258 (0%)	-	-	-	-	-	1	1	-	-	-	-	-	-	-	-	1	-	-	-	-	-	-	-	-	-	-	-	-	-	-	-	1	-	-	-	1	-	-
34	yjm1199_Chr10_6492_8839_1	380 aa	None	-	Spar13	98.16	380	0	>dbj|GAA21449.1| K7_Ehl2p [Saccharomyces cerevisiae Kyokai no. 7]	Length=377	Identities = 376/377 (99%), Positives = 376/377 (99%), Gaps = 0/377 (0%)	-	-	-	-	-	1	1	-	-	-	-	-	-	-	-	1	-	-	-	-	-	-	-	-	-	-	-	-	-	-	-	1	-	-	-	1	-	-
35	yjm1202_Chr15_148801_194125_1	310 aa	None	-	Sarb_chr03	52.16	232	0	>ref|XP_003683079.1| hypothetical protein TDEL_0G05010 [Torulaspora delbrueckii]	Length=568	Identities = 275/297 (93%), Positives = 287/297 (97%), Gaps = 0/297 (0%)	-	-	-	-	-	-	1	-	-	-	-	-	-	-	-	-	-	-	-	-	-	-	-	-	-	-	-	-	-	-	-	-	-	-	-	-	-	-
36	yjm1202_Chr15_148801_194125_2	285 aa	None	-	Sbay31	45.65	276	0	>ref|XP_003680111.1| hypothetical protein TDEL_0C00110 [Torulaspora delbrueckii]	Length=455	Identities = 267/276 (97%), Positives = 273/276 (99%), Gaps = 0/276 (0%)	-	-	-	-	-	-	1	-	-	-	-	-	-	-	-	-	-	-	-	-	-	-	-	-	-	-	-	-	-	-	-	-	-	-	-	-	-	-
37	yjm1202_Chr15_148801_194125_3	529 aa	None	-	3185FM1318	49.9	485	0	>ref|XP_003680115.1| hypothetical protein TDEL_0C00150 [Torulaspora delbrueckii]	Length=526	Identities = 518/526 (98%), Positives = 524/526 (99%), Gaps = 0/526 (0%)	-	-	-	-	-	-	1	-	-	-	-	-	-	-	-	-	-	-	-	-	-	-	-	-	-	-	-	-	-	-	-	-	-	-	-	-	-	-
38	yjm1202_Chr15_148801_194125_4	286 aa	None	-	yjm1523NODE_6941_length_9762_cov_5.158984	28.08	260	0	>ref|XP_003680116.1| hypothetical protein TDEL_0C00160 [Torulaspora delbrueckii]	Length=281	Identities = 244/281 (87%), Positives = 262/281 (93%), Gaps = 0/281 (0%)	-	-	-	-	-	-	1	-	-	-	-	-	-	-	-	-	-	-	-	-	-	-	-	-	-	-	-	-	-	-	-	-	-	-	-	-	-	-
39	yjm1202_Chr15_148801_194125_5	291 aa	None	-	Sbay4	26.46	257	1e-127	>ref|XP_003680117.1| hypothetical protein TDEL_0C00170 [Torulaspora delbrueckii]	Length=244	Identities = 175/203 (86%), Positives = 192/203 (95%), Gaps = 0/203 (0%)	-	-	-	-	-	-	1	-	-	-	-	-	-	-	-	-	-	-	-	-	-	-	-	-	-	-	-	-	-	-	-	-	-	-	-	-	-	-
40	yjm1202_Chr15_148801_194125_8	496 aa	None	-	Smik2	28.05	82	1e-127	>ref|XP_003680117.1| hypothetical protein TDEL_0C00170 [Torulaspora delbrueckii]	Length=244	Identities = 175/203 (86%), Positives = 192/203 (95%), Gaps = 0/203 (0%)	-	-	-	-	-	-	1	-	-	-	-	-	-	-	-	-	-	-	-	-	-	-	-	-	-	-	-	-	-	-	-	-	-	-	-	-	-	-
41	yjm1202_Chr15_148801_194125_9	660 aa	None	-	Sbay6	66.54	541	0	>ref|XP_003680120.1| hypothetical protein TDEL_0C00200 [Torulaspora delbrueckii]	Length=627	Identities = 598/614 (97%), Positives = 604/614 (98%), Gaps = 0/614 (0%)	-	-	-	-	-	-	1	-	-	-	-	-	-	-	-	-	-	-	-	-	-	-	-	-	-	-	-	-	-	-	-	-	-	-	-	-	-	-
42	yjm1202_Chr15_148801_194125_10	371 aa	None	-	Port1	64.75	366	0	>ref|XP_003680122.1| hypothetical protein TDEL_0C00220 [Torulaspora delbrueckii]	Length=365	Identities = 362/365 (99%), Positives = 363/365 (99%), Gaps = 0/365 (0%)	-	-	-	-	-	-	1	-	-	-	-	-	-	-	-	-	-	-	-	-	-	-	-	-	-	-	-	-	-	-	-	-	-	-	-	-	-	-
43	yjm1202_Chr15_148801_194125_11	527 aa	None	-	yjm1524NODE_7327_length_4138_cov_4.462784	41.88	554	0	>ref|XP_003680124.1| hypothetical protein TDEL_0C00240 [Torulaspora delbrueckii]	Length=526	Identities = 493/526 (94%), Positives = 508/526 (97%), Gaps = 0/526 (0%)	-	-	-	-	-	-	1	-	-	-	-	-	-	-	-	-	-	-	-	-	-	-	-	-	-	-	-	-	-	-	-	-	-	-	-	-	-	-
44	yjm1202_Chr15_148801_194125_12	261 aa	None	-	yjm1524NODE_10334_length_2633_cov_4.013673	64.23	260	6e-179	>ref|XP_003680127.1| hypothetical protein TDEL_0C00270 [Torulaspora delbrueckii]	Length=717	Identities = 251/258 (97%), Positives = 252/258 (98%), Gaps = 2/258 (1%)	-	-	-	-	-	-	1	-	-	-	-	-	-	-	-	-	-	-	-	-	-	-	-	-	-	-	-	-	-	-	-	-	-	-	-	-	-	-
45	yjm1202_Chr15_148801_194125_13	538 aa	None	-	Sbay30	67.91	536	0	>ref|XP_003680354.1| hypothetical protein TDEL_0C02540 [Torulaspora delbrueckii]	Length=536	Identities = 527/536 (98%), Positives = 534/536 (99%), Gaps = 0/536 (0%)	-	-	-	-	-	-	1	-	-	-	-	-	-	-	-	-	-	-	-	-	-	-	-	-	-	-	-	-	-	-	-	-	-	-	-	-	-	-
46	yjm1202_Chr15_148801_194125_14	183 aa	None	-	Spar10	45.6	125	2e-105	>ref|XP_003680355.1| hypothetical protein TDEL_0C02550 [Torulaspora delbrueckii]	Length=535	Identities = 158/164 (96%), Positives = 161/164 (98%), Gaps = 0/164 (0%)	-	-	-	-	-	-	1	-	-	-	-	-	-	-	-	-	-	-	-	-	-	-	-	-	-	-	-	-	-	-	-	-	-	-	-	-	-	-
47	yjm1202_Chr15_148801_194125_17	240 aa	None	-	Sarb_chr09.rev	64.1	234	2e-167	>ref|XP_003680121.1| hypothetical protein TDEL_0C00210 [Torulaspora delbrueckii]	Length=234	Identities = 231/234 (99%), Positives = 233/234 (99%), Gaps = 0/234 (0%)	-	-	-	-	-	-	1	-	-	-	-	-	-	-	-	-	-	-	-	-	-	-	-	-	-	-	-	-	-	-	-	-	-	-	-	-	-	-
48	yjm1202_Chr15_148801_194125_18	598 aa	None	-	yjm1524NODE_2078_length_8512_cov_5.580357	85.54	567	0	>ref|XP_003680118.1| hypothetical protein TDEL_0C00180 [Torulaspora delbrueckii]	Length=588	Identities = 586/588 (99%), Positives = 588/588 (100%), Gaps = 0/588 (0%)	-	-	-	-	-	-	1	-	-	-	-	-	-	-	-	-	-	-	-	-	-	-	-	-	-	-	-	-	-	-	-	-	-	-	-	-	-	-
49	yjm1202_Chr15_148801_194125_20	806 aa	None	-	Sbay5	74.06	794	0	>ref|XP_003680113.1| hypothetical protein TDEL_0C00130 [Torulaspora delbrueckii]	Length=792	Identities = 780/792 (98%), Positives = 785/792 (99%), Gaps = 0/792 (0%)	-	-	-	-	-	-	1	-	-	-	-	-	-	-	-	-	-	-	-	-	-	-	-	-	-	-	-	-	-	-	-	-	-	-	-	-	-	-
50	yjm1202_Chr15_148801_194125_21	575 aa	None	-	Sbay6	75.36	556	0	>ref|XP_003680112.1| hypothetical protein TDEL_0C00120 [Torulaspora delbrueckii]	Length=569	Identities = 539/569 (95%), Positives = 558/569 (98%), Gaps = 0/569 (0%)	-	-	-	-	-	-	1	-	-	-	-	-	-	-	-	-	-	-	-	-	-	-	-	-	-	-	-	-	-	-	-	-	-	-	-	-	-	-
51	yjm1208_Chr15_15691_26587_2	190 aa	None	-	yjm1523NODE_6804_length_1687_cov_3.989330	24.24	99	4e-91	>gb|EEU05583.1| hypothetical protein C1Q_05659 [Saccharomyces cerevisiae JAY291]	Length=644	Identities = 144/176 (82%), Positives = 152/176 (86%), Gaps = 1/176 (1%)	-	-	-	-	-	-	-	1	-	-	-	-	-	-	-	-	-	-	-	-	-	-	1	-	-	-	-	-	1	-	-	-	-	-	-	-	-	-
52	yjm1208_Chr15_15691_26587_5	179 aa	None	-	3731FM1318	27.94	68	2e-102	>gb|EEU05584.1| hypothetical protein C1Q_05660 [Saccharomyces cerevisiae JAY291]	Length=533	Identities = 154/176 (88%), Positives = 158/176 (90%), Gaps = 2/176 (1%)	-	-	-	-	-	-	-	1	-	-	-	-	-	-	-	-	-	-	-	-	-	-	1	-	-	-	-	-	1	-	-	-	-	-	-	-	-	-
53	yjm1208_Chr15_15691_26587_6	231 aa	None	-	Sarb_chr13.rev	22.08	231	2e-123	>gb|EEU05584.1| hypothetical protein C1Q_05660 [Saccharomyces cerevisiae JAY291]	Length=533	Identities = 189/237 (80%), Positives = 195/237 (82%), Gaps = 22/237 (9%)	-	-	-	-	-	-	-	1	-	-	-	-	-	-	-	-	-	-	-	-	-	-	1	-	-	-	-	-	1	-	-	-	-	-	-	-	-	-
54	yjm1244_Chr07_1030446_1032536_1	162 aa	None	-	yjm1524NODE_4065_length_2428_cov_4.710461	91.57	83	-	++++NoSignigicantHits++++	-	-	-	-	1	-	-	1	1	-	1	1	-	-	-	-	1	-	-	1	1	-	-	1	-	-	1	1	1	1	1	1	-	-	-	-	-	-	1	1
55	yjm1244_Chr13_898816_902651_1	253 aa	None	-	yjm1523NODE_6216_length_534_cov_4.580524	91.48	176	1e-161	>gb|EDZ68592.1| hypothetical protein AWRI1631_11090010 [Saccharomyces cerevisiae	Length=222	Identities = 221/222 (99%), Positives = 221/222 (99%), Gaps = 0/222 (0%)	1	-	1	-	-	-	-	-	1	1	-	1	1	-	-	-	1	-	-	-	-	-	-	-	-	-	1	-	-	-	-	-	-	-	-	-	1	1
56	yjm1248_Chr05_564727_566415_1	184 aa	None	-	yjm1523NODE_518_length_435_cov_12.491954	96.35	137	5e-102	>gb|EGA76218.1| hypothetical protein VIN13_5222 [Saccharomyces cerevisiae Vin13]	Length=177	Identities = 151/155 (97%), Positives = 152/155 (98%), Gaps = 1/155 (1%)	-	-	-	1	-	1	-	-	-	-	1	-	-	1	-	-	-	-	1	1	-	-	1	-	-	-	-	1	-	-	-	-	1	1	1	1	-	-
57	yjm1248_Chr08_506909_511495_1	275 aa	None	-	Smik17	92.11	190	-	++++NoSignigicantHits++++	-	-	-	-	-	-	-	-	-	-	-	-	1	-	-	-	-	-	-	-	-	-	-	-	-	-	-	-	-	-	-	-	-	-	-	1	-	-	-	-
58	yjm1248_Chr08_506909_511495_2	298 aa	None	-	Smik17	88.65	282	0	>gb|EIW07371.1| hypothetical protein CENPK1137D_1958 [Saccharomyces cerevisiae	Length=268	Identities = 268/268 (100%), Positives = 268/268 (100%), Gaps = 0/268 (0%)	-	-	-	-	-	-	-	-	-	-	1	-	-	-	-	-	-	-	-	-	-	-	-	-	-	-	-	-	-	-	-	-	-	1	-	-	-	-
59	yjm1248_Chr12_1529587_1530883_1	268 aa	None	-	yjm1523NODE_3706_length_3322_cov_4.016255	96.64	268	3e-63	>ref|XP_003688415.1| hypothetical protein TPHA_0N01990 [Tetrapisispora phaffii CBS	Length=341	Identities = 117/272 (43%), Positives = 163/272 (60%), Gaps = 10/272 (4%)	-	-	-	-	-	-	-	-	-	-	1	-	-	-	-	-	-	-	-	-	-	-	1	-	-	-	-	-	-	-	-	-	-	-	-	-	-	-
60	yjm1250_Chr10_12034_35004_1	294 aa	None	-	Sarb_chr08	32.54	295	0	>gb|EEU05580.1| hypothetical protein C1Q_05656 [Saccharomyces cerevisiae JAY291]	Length=285	Identities = 284/285 (99%), Positives = 284/285 (99%), Gaps = 0/285 (0%)	-	-	-	-	-	-	-	1	-	-	1	1	-	-	-	1	-	-	-	-	-	-	-	-	-	1	1	-	1	-	-	-	-	-	-	-	-	-
61	yjm1250_Chr10_12034_35004_2	643 aa	None	-	Spar15	37.65	571	0	>gb|EEU05581.1| hypothetical protein C1Q_05657 [Saccharomyces cerevisiae JAY291]	Length=611	Identities = 606/611 (99%), Positives = 608/611 (99%), Gaps = 0/611 (0%)	-	-	-	-	-	-	-	-	-	-	-	1	-	-	-	-	-	-	-	-	-	-	-	-	-	-	-	-	-	-	-	-	-	-	-	-	-	-
62	yjm1250_Chr10_12034_35004_6	367 aa	None	-	yjm1523NODE_3482_length_2245_cov_6.127840	47.95	365	2e-120	>gb|EHN00687.1| Adh6p [Saccharomyces cerevisiae x Saccharomyces kudriavzevii	Length=360	Identities = 172/355 (48%), Positives = 253/355 (71%), Gaps = 2/355 (1%)	-	-	-	-	-	-	-	-	-	-	-	1	-	-	-	-	-	-	-	-	-	-	-	-	-	-	-	-	-	-	-	-	-	-	-	-	-	-
63	yjm1250_Chr10_12034_35004_8	534 aa	None	-	Sbay43	25.35	501	0	>gb|EEU05584.1| hypothetical protein C1Q_05660 [Saccharomyces cerevisiae JAY291]	Length=533	Identities = 513/533 (96%), Positives = 517/533 (97%), Gaps = 0/533 (0%)	-	-	-	-	-	-	-	-	-	-	-	1	-	-	-	-	-	-	-	-	-	-	-	-	-	-	-	-	-	-	-	-	-	-	-	-	-	-
64	yjm1250_Chr10_12034_35004_9	290 aa	None	-	Sbay31	59.3	285	0	>gb|EEU05584.1| hypothetical protein C1Q_05660 [Saccharomyces cerevisiae JAY291]	Length=533	Identities = 513/533 (96%), Positives = 517/533 (97%), Gaps = 0/533 (0%)	-	-	-	-	-	-	-	-	-	-	-	1	-	-	-	-	-	-	-	-	-	-	-	-	-	-	-	-	-	-	-	-	-	-	-	-	-	-
65	yjm1250_Chr15_1030694_1032316_1	236 aa	None	-	Spar15	66.82	217	2e-101	>gb|EGA84197.1| hypothetical protein VL3_5230 [Saccharomyces cerevisiae VL3]	Length=147	Identities = 147/147 (100%), Positives = 147/147 (100%), Gaps = 0/147 (0%)	-	-	-	-	-	-	-	-	-	-	-	1	-	-	-	1	-	-	1	1	1	1	-	-	-	-	-	-	-	-	-	-	-	-	-	-	-	-
66	yjm1250_Chr16_6362_12442_1	822 aa	None	-	Port161	52.65	773	0	>ref|NP_011111.1| hypothetical protein YER184C [Saccharomyces cerevisiae S288c]	Length=794	Identities = 412/780 (53%), Positives = 552/780 (71%), Gaps = 13/780 (2%)	-	-	-	-	-	-	-	-	-	-	-	1	-	-	-	-	-	-	-	-	-	-	-	-	-	-	-	-	-	-	-	-	-	-	-	-	-	-
67	yjm1252_Chr01_10487_15209_1	150 aa	None	-	Spar1	100	150	-	++++NoSignigicantHits++++	-	-	-	-	-	-	-	-	-	-	-	-	-	-	1	-	-	-	-	-	-	-	-	-	-	-	-	-	-	-	-	-	-	-	-	-	-	-	-	-
68	yjm1252_Chr01_10487_15209_2	453 aa	None	-	yjm1524NODE_6413_length_1410_cov_5.679432	88.34	343	0	>emb|CAY77581.1| Flo9p [Saccharomyces cerevisiae EC1118]	Length=1047	Identities = 353/401 (88%), Positives = 373/401 (93%), Gaps = 0/401 (0%)	-	-	-	-	-	-	-	-	-	-	-	-	1	-	-	-	-	-	-	-	-	-	-	-	-	-	-	-	-	-	-	-	-	-	-	-	-	-
69	yjm1252_Chr05_3422_10540_2	513 aa	None	-	4102FM1318	30.12	518	0	>gb|EGA72502.1| hypothetical protein AWRI796_5163 [Saccharomyces cerevisiae AWRI796]	Length=369	Identities = 320/323 (99%), Positives = 320/323 (99%), Gaps = 0/323 (0%)	-	-	-	-	-	-	-	-	-	-	-	-	1	-	-	-	-	-	-	-	-	1	-	-	-	-	-	-	-	-	-	-	-	-	-	-	-	-
70	yjm1252_Chr05_13952_21912_1	182 aa	None	-	yjm1524NODE_1728_length_9045_cov_6.079602	82.61	161	5e-67	>gb|EGA73222.1| hypothetical protein AWRI796_4257 [Saccharomyces cerevisiae AWRI796]	Length=304	Identities = 119/176 (68%), Positives = 143/176 (81%), Gaps = 2/176 (1%)	-	-	-	-	-	-	-	-	-	-	-	-	1	-	-	-	-	-	-	-	-	1	-	-	-	-	-	-	-	-	-	-	-	-	-	-	-	-
71	yjm1252_Chr05_13952_21912_3	225 aa	None	-	yjm1524NODE_1728_length_9045_cov_6.079602	58.78	148	9e-61	>gb|EGA72507.1| hypothetical protein AWRI796_5168 [Saccharomyces cerevisiae AWRI796]	Length=116	Identities = 113/116 (97%), Positives = 114/116 (98%), Gaps = 0/116 (0%)	-	-	-	-	-	-	-	-	-	-	-	-	1	-	-	-	-	-	-	-	-	1	-	-	-	-	-	-	-	-	-	-	-	-	-	-	-	-
72	yjm1252_Chr05_13952_21912_4	300 aa	None	-	yjm1519NODE_993_length_11620_cov_307.785889	86.64	277	0	>gb|EGA72508.1| hypothetical protein AWRI796_5169 [Saccharomyces cerevisiae AWRI796]	Length=262	Identities = 261/262 (99%), Positives = 261/262 (99%), Gaps = 0/262 (0%)	-	-	-	-	-	-	-	-	-	-	-	-	1	-	-	-	-	-	-	-	-	1	-	-	-	-	-	-	-	-	-	-	-	-	-	-	-	-
73	yjm1252_Chr12_1994708_1995978_1	213 aa	None	-	Spar12	99.53	213	4e-129	>ref|NP_013561.1| pyridoxal 5'-phosphate synthase [Saccharomyces cerevisiae S288c]	Length=204	Identities = 181/204 (89%), Positives = 190/204 (93%), Gaps = 0/204 (0%)	-	-	-	-	-	-	-	-	-	-	-	-	1	-	-	-	-	-	-	-	-	-	-	-	-	-	-	-	-	-	-	-	-	-	-	-	-	-
74	yjm1273_Chr13_904055_905979_1	157 aa	None	-	yjm1523NODE_6216_length_534_cov_4.580524	92.31	143	7e-89	>gb|EGA84222.1| hypothetical protein VL3_5197 [Saccharomyces cerevisiae VL3]	Length=145	Identities = 130/141 (92%), Positives = 135/141 (96%), Gaps = 0/141 (0%)	1	-	1	1	-	1	-	-	1	1	1	1	1	1	1	-	1	-	1	1	-	-	1	-	-	-	1	1	-	-	-	-	1	1	1	1	1	1
75	yjm1304_Chr03_105569_106923_1	284 aa	None	-	yjm1524NODE_9177_length_3411_cov_3.915860	97.18	284	1e-161	>emb|CAB06799.1| unknown [Saccharomyces pastorianus]	Length=386	Identities = 220/283 (78%), Positives = 256/283 (90%), Gaps = 0/283 (0%)	-	-	-	-	-	-	-	-	-	-	-	-	-	-	1	-	-	-	-	-	-	-	-	-	-	-	-	-	-	-	-	-	-	-	-	-	-	-
76	yjm1304_Chr13_907110_910962_1	205 aa	None	-	yjm1523NODE_518_length_435_cov_12.491954	99.37	158	4e-116	>gb|EDZ68592.1| hypothetical protein AWRI1631_11090010 [Saccharomyces cerevisiae	Length=222	Identities = 161/185 (87%), Positives = 169/185 (91%), Gaps = 0/185 (0%)	-	-	1	-	-	-	-	-	-	-	-	-	-	-	1	-	-	-	-	-	-	-	-	-	-	-	-	-	-	-	-	-	-	-	-	-	-	-
77	yjm1307_Chr14_5816_8392_1	323 aa	None	-	Sarb_chr08	31.6	250	0	>gb|EEU06104.1| hypothetical protein C1Q_05662 [Saccharomyces cerevisiae JAY291]	Length=285	Identities = 283/285 (99%), Positives = 285/285 (100%), Gaps = 0/285 (0%)	-	-	-	-	-	-	-	1	-	-	1	1	-	-	-	1	-	-	-	-	-	-	-	-	-	1	1	-	1	-	-	-	-	-	-	-	-	-
78	yjm1326_Chr15_8150_12407_1	293 aa	None	-	Sbay31	59.3	285	0	>gb|EEU06104.1| hypothetical protein C1Q_05662 [Saccharomyces cerevisiae JAY291]	Length=285	Identities = 283/285 (99%), Positives = 285/285 (100%), Gaps = 0/285 (0%)	-	-	-	-	-	-	-	1	-	-	1	1	-	-	-	1	-	-	-	-	-	-	-	-	-	1	1	-	1	-	-	-	-	-	-	-	-	-
79	yjm1326_Chr15_12607_18169_1	239 aa	None	-	Sarb_chr12	42.42	66	4e-113	>gb|EEU05583.1| hypothetical protein C1Q_05659 [Saccharomyces cerevisiae JAY291]	Length=644	Identities = 163/205 (80%), Positives = 184/205 (90%), Gaps = 0/205 (0%)	-	-	-	-	-	-	-	-	-	-	-	-	-	-	-	-	-	1	-	-	-	-	-	-	-	-	-	-	-	-	-	-	-	-	-	-	-	-
80	yjm1326_Chr15_12607_18169_2	230 aa	None	-	Sbay31	32.94	85	3e-133	>gb|EEU05583.1| hypothetical protein C1Q_05659 [Saccharomyces cerevisiae JAY291]	Length=644	Identities = 185/209 (89%), Positives = 201/209 (96%), Gaps = 0/209 (0%)	-	-	-	-	-	-	-	-	-	-	-	-	-	-	-	-	-	1	-	-	-	-	-	1	-	-	-	-	-	-	-	-	-	-	-	-	-	-
81	yjm1326_Chr15_12607_18169_3	152 aa	None	-	-	-	-	4e-58	>gb|EEU05583.1| hypothetical protein C1Q_05659 [Saccharomyces cerevisiae JAY291]	Length=644	Identities = 92/125 (74%), Positives = 111/125 (89%), Gaps = 0/125 (0%)	-	-	-	-	-	-	-	-	-	-	-	-	-	-	-	-	-	1	-	-	-	-	-	1	-	-	-	-	-	-	-	-	-	-	-	-	-	-
82	yjm1326_Chr15_18983_21691_1	292 aa	None	-	Sarb_chr08	29.9	301	2e-164	>gb|EEU05580.1| hypothetical protein C1Q_05656 [Saccharomyces cerevisiae JAY291]	Length=285	Identities = 211/284 (74%), Positives = 255/284 (90%), Gaps = 0/284 (0%)	-	-	-	-	-	-	-	-	-	-	-	-	-	-	-	-	-	1	-	-	-	-	-	1	-	-	-	-	-	-	-	-	-	-	-	-	-	-
83	yjm1338_Chr09_18904_21930_1	261 aa	None	-	Spar9	99.23	261	-	++++NoSignigicantHits++++	-	-	-	-	-	-	-	-	-	-	-	-	-	-	-	-	-	-	-	-	-	-	1	-	-	-	-	-	-	-	-	-	-	-	-	-	-	-	-	-
84	yjm1342_Chr02_249884_257205_1	528 aa	None	-	Sbay3	84.47	528	0	>gb|ADD21408.1| GAL1p [Saccharomyces kudriavzevii]	Length=528	Identities = 439/527 (83%), Positives = 478/527 (91%), Gaps = 1/527 (0%)	-	-	-	-	-	-	-	-	-	-	-	-	-	-	-	-	-	-	-	-	-	-	1	-	-	-	-	-	-	-	-	-	-	-	-	-	-	-
85	yjm1342_Chr02_249884_257205_2	703 aa	None	-	Sbay3	86.7	699	0	>gb|ADD21407.1| GAL10p [Saccharomyces kudriavzevii]	Length=699	Identities = 596/699 (85%), Positives = 648/699 (93%), Gaps = 0/699 (0%)	-	-	-	-	-	-	-	-	-	-	-	-	-	-	-	-	-	-	-	-	-	-	1	-	-	-	-	-	-	-	-	-	-	-	-	-	-	-
86	yjm1342_Chr02_249884_257205_3	376 aa	None	-	3661FM1318	87.7	366	0	>gb|ADD21406.1| GAL7p [Saccharomyces kudriavzevii]	Length=366	Identities = 309/366 (84%), Positives = 338/366 (92%), Gaps = 0/366 (0%)	-	-	-	-	-	-	-	-	-	-	-	-	-	-	-	-	-	-	-	-	-	-	1	-	-	-	-	-	-	-	-	-	-	-	-	-	-	-
87	yjm1342_Chr12_268563_274485_1	572 aa	None	-	Smik9	87.78	573	0	>gb|AAU43755.1| GAL2 [Saccharomyces mikatae IFO 1815]	Length=573	Identities = 505/576 (88%), Positives = 542/576 (94%), Gaps = 7/576 (1%)	-	-	-	-	-	-	-	-	-	-	-	-	-	-	-	-	-	-	-	-	-	-	1	-	-	-	-	-	-	-	-	-	-	-	-	-	-	-
88	yjm1342_Chr12_268563_274485_2	392 aa	None	-	yjm1523NODE_5926_length_10164_cov_4.595140	68.62	392	0	>ref|NP_013183.1| Srl2p [Saccharomyces cerevisiae S288c]	Length=392	Identities = 279/392 (71%), Positives = 330/392 (84%), Gaps = 0/392 (0%)	-	-	-	-	-	-	-	-	-	-	-	-	-	-	-	-	-	-	-	-	-	-	1	-	-	-	-	-	-	-	-	-	-	-	-	-	-	-
89	yjm1342_Chr15_6527_18878_1	271 aa	None	-	Sarb_chr08	32.91	234	0	>gb|EEU06104.1| hypothetical protein C1Q_05662 [Saccharomyces cerevisiae JAY291]	Length=285	Identities = 244/271 (90%), Positives = 256/271 (94%), Gaps = 0/271 (0%)	-	-	-	-	-	-	-	-	-	-	1	1	-	-	-	-	-	-	-	-	-	-	1	-	-	-	-	-	-	-	-	-	-	-	-	-	-	-
90	yjm1355_Chr01_15527_19043_1	169 aa	None	-	Spar1	45	140	5e-91	>gb|EGA63430.1| hypothetical protein FOSTERSO_0001 [Saccharomyces cerevisiae	Length=140	Identities = 138/140 (99%), Positives = 139/140 (99%), Gaps = 0/140 (0%)	-	-	-	-	-	-	-	-	-	-	-	-	-	-	-	-	-	-	-	-	-	-	-	1	-	-	-	-	-	-	-	-	-	-	-	-	-	-
91	yjm1355_Chr03_5330_7532_2	288 aa	None	-	Spar6	79.7	266	1e-155	>gb|EHN08328.1| YBL100W-B-like protein [Saccharomyces cerevisiae x Saccharomyces	Length=1127	Identities = 238/257 (93%), Positives = 243/257 (95%), Gaps = 7/257 (3%)	1	-	-	-	-	-	-	-	-	-	-	-	-	-	-	-	-	-	-	-	-	-	-	1	-	-	-	-	-	-	-	-	-	-	-	-	-	-
92	yjm1355_Chr11_340887_342892_1	151 aa	None	-	Sarb_chr01.rev	84.75	59	-	++++NoSignigicantHits++++	-	-	-	-	-	-	-	-	-	-	-	-	-	-	-	-	-	-	-	-	-	-	-	-	-	1	-	-	-	-	-	-	-	-	-	-	-	-	-	-
93	yjm1381_Chr05_18266_30075_2	616 aa	None	-	Spar14	93.97	597	0	>gb|EDV10954.1| conserved hypothetical protein [Saccharomyces cerevisiae RM11-1a]	Length=598	Identities = 598/598 (100%), Positives = 598/598 (100%), Gaps = 0/598 (0%)	-	1	-	-	-	-	-	1	-	-	1	-	1	1	-	1	-	-	-	-	1	1	1	1	-	1	1	-	-	-	1	1	1	1	1	1	-	-
94	yjm1385_Chr01_176456_179818_2	235 aa	None	-	Spar1	65.64	227	1e-157	>emb|CAE52431.1| hypothetical protein [Saccharomyces cerevisiae]	Length=241	Identities = 211/228 (93%), Positives = 217/228 (95%), Gaps = 0/228 (0%)	-	-	-	-	-	1	1	-	-	-	-	-	-	1	1	-	1	-	-	-	-	-	-	-	-	-	-	1	-	-	1	1	-	-	1	-	-	-
95	yjm1385_Chr06_117739_139732_1	258 aa	None	-	Smik12	32	75	1e-157	>emb|CAE52431.1| hypothetical protein [Saccharomyces cerevisiae]	Length=241	Identities = 211/228 (93%), Positives = 217/228 (95%), Gaps = 0/228 (0%)	-	-	-	-	-	1	1	-	-	-	-	-	-	1	1	-	1	-	-	-	-	-	-	-	-	-	-	1	-	-	1	1	-	-	1	-	-	-
96	yjm1385_Chr06_117739_139732_2	606 aa	None	-	yjm1524NODE_4980_length_8070_cov_4.992069	72.54	528	0	>gb|AAO32573.1| DIP5 [Lachancea kluyveri]	Length=581	Identities = 402/581 (69%), Positives = 481/581 (83%), Gaps = 14/581 (2%)	-	-	-	-	-	-	-	-	-	-	-	-	-	-	-	-	-	-	-	-	-	-	-	-	-	-	-	1	-	-	-	-	-	-	-	-	-	-
97	yjm1385_Chr06_117739_139732_3	422 aa	None	-	yjm1523NODE_5156_length_5195_cov_4.407507	63.35	412	0	>ref|XP_003678737.1| hypothetical protein TDEL_0A01940 [Torulaspora delbrueckii]	Length=420	Identities = 268/412 (65%), Positives = 336/412 (82%), Gaps = 0/412 (0%)	-	-	-	-	-	-	-	-	-	-	-	-	-	-	-	-	-	-	-	-	-	-	-	-	-	-	-	1	-	-	-	-	-	-	-	-	-	-
98	yjm1385_Chr06_117739_139732_4	383 aa	None	-	Port53	50.54	368	4e-124	>ref|XP_003681510.1| hypothetical protein TDEL_0E00560 [Torulaspora delbrueckii]	Length=362	Identities = 182/359 (51%), Positives = 248/359 (69%), Gaps = 13/359 (4%)	-	-	-	-	-	-	-	-	-	-	-	-	-	-	-	-	-	-	-	-	-	-	-	-	-	-	-	1	-	-	-	-	-	-	-	-	-	-
99	yjm1385_Chr06_139933_149186_1	168 aa	None	-	Skud20	66.67	21	-	++++NoSignigicantHits++++	-	-	-	-	-	-	-	-	-	-	-	-	-	-	-	-	-	-	-	-	-	-	-	-	-	-	-	-	-	1	-	-	-	-	-	-	-	-	-	-
100	yjm1385_Chr06_139933_149186_5	193 aa	None	-	yjm1524NODE_2009_length_1532_cov_4.084857	45.4	174	4e-76	>gb|EDZ68597.1| hypothetical protein AWRI1631_11040020 [Saccharomyces cerevisiae	Length=419	Identities = 113/174 (65%), Positives = 136/174 (78%), Gaps = 0/174 (0%)	-	-	-	-	-	-	-	-	-	-	-	-	-	-	-	-	-	-	-	-	-	-	-	-	-	-	-	1	-	-	-	-	-	-	-	-	-	-
101	yjm1385_Chr07_395765_396216_1	150 aa	None	-	yjm1524NODE_12009_length_3544_cov_3.900395	68.8	125	1e-93	>emb|CAE52431.1| hypothetical protein [Saccharomyces cerevisiae]	Length=241	Identities = 134/147 (91%), Positives = 137/147 (93%), Gaps = 6/147 (4%)	-	-	-	-	-	1	1	-	-	-	-	-	-	1	1	-	1	-	-	-	-	-	-	-	-	-	-	1	-	-	1	1	-	-	1	-	-	-
102	yjm1385_Chr16_43877_44817_1	238 aa	None	-	Spar1	59.31	231	3e-168	>emb|CAE52431.1| hypothetical protein [Saccharomyces cerevisiae]	Length=241	Identities = 227/228 (99%), Positives = 227/228 (99%), Gaps = 0/228 (0%)	-	-	-	-	-	1	1	-	-	-	-	-	-	1	1	-	1	-	-	-	-	-	-	-	-	-	-	1	-	-	1	1	-	-	1	-	-	-
103	yjm1387_Chr15_1037671_1083377_1	572 aa	None	-	yjm1519NODE_903_length_19711_cov_242.798126	62.7	555	0	>ref|XP_003681445.1| hypothetical protein TDEL_0D06500 [Torulaspora delbrueckii]	Length=542	Identities = 405/554 (73%), Positives = 466/554 (84%), Gaps = 12/554 (2%)	-	-	-	-	-	-	-	-	-	-	-	-	-	-	-	-	-	-	-	-	-	-	-	-	-	-	-	-	-	1	-	-	-	-	-	-	-	-
104	yjm1387_Chr15_1037671_1083377_2	601 aa	None	-	yjm1519NODE_1503_length_3542_cov_324.505096	72.4	587	0	>emb|CAY86671.1| EC1118_1O4_6491p [Saccharomyces cerevisiae EC1118]	Length=592	Identities = 592/592 (100%), Positives = 592/592 (100%), Gaps = 0/592 (0%)	-	-	-	-	-	-	-	-	-	-	-	-	-	-	-	-	-	-	-	-	-	-	-	-	1	-	-	-	-	1	-	-	-	-	-	-	-	-
105	yjm1387_Chr15_1037671_1083377_4	648 aa	None	-	Sbay33	62.46	626	0	>gb|EHN04002.1| Fre7p [Saccharomyces cerevisiae x Saccharomyces kudriavzevii	Length=648	Identities = 645/645 (100%), Positives = 645/645 (100%), Gaps = 0/645 (0%)	-	-	-	-	-	-	-	-	-	-	-	-	-	-	-	-	-	-	-	-	-	-	-	-	-	-	-	-	-	1	-	-	-	-	-	-	1	-
106	yjm1387_Chr15_1037671_1083377_5	524 aa	None	-	yjm1519NODE_348_length_1671_cov_1029.330933	75	436	0	>emb|CAY86677.1| Hxt13p [Saccharomyces cerevisiae EC1118]	Length=520	Identities = 520/520 (100%), Positives = 520/520 (100%), Gaps = 0/520 (0%)	-	-	-	-	-	-	-	-	-	-	-	-	-	-	-	-	-	-	-	-	-	-	-	-	-	-	-	-	-	1	-	-	-	-	-	-	1	-
107	yjm1387_Chr15_1037671_1083377_8	305 aa	None	-	4368FM1318	29.27	205	0	>emb|CAY86680.1| EC1118_1O4_6612p [Saccharomyces cerevisiae EC1118]	Length=260	Identities = 260/260 (100%), Positives = 260/260 (100%), Gaps = 0/260 (0%)	-	-	-	-	-	-	-	-	-	-	-	-	-	-	-	-	-	-	-	-	-	-	-	-	-	-	-	-	-	1	-	-	-	-	-	-	1	-
108	yjm1387_Chr15_1037671_1083377_10	394 aa	None	-	yjm1524NODE_4144_length_4751_cov_6.039150	43.93	346	0	>gb|EHN03996.1| Nft1p, partial [Saccharomyces cerevisiae x Saccharomyces kudriavzevii	Length=390	Identities = 390/390 (100%), Positives = 390/390 (100%), Gaps = 0/390 (0%)	-	-	-	-	-	-	-	-	-	-	-	-	-	-	-	-	-	-	-	-	-	-	-	-	-	-	-	-	-	1	-	-	-	-	-	-	1	-
109	yjm1387_Chr15_1037671_1083377_12	347 aa	None	-	yjm1523NODE_2222_length_1866_cov_6.711683	71.68	339	0	>emb|CAY86679.1| EC1118_1O4_6579p [Saccharomyces cerevisiae EC1118]	Length=342	Identities = 342/342 (100%), Positives = 342/342 (100%), Gaps = 0/342 (0%)	-	-	-	-	-	-	-	-	-	-	-	-	-	-	-	-	-	-	-	-	-	-	-	-	-	-	-	-	-	1	-	-	-	-	-	-	1	-
110	yjm1387_Chr15_1037671_1083377_13	213 aa	None	-	Port247	76.85	203	1e-122	>emb|CAY86678.1| EC1118_1O4_6568p [Saccharomyces cerevisiae EC1118]	Length=180	Identities = 180/180 (100%), Positives = 180/180 (100%), Gaps = 0/180 (0%)	-	-	-	-	-	-	-	-	-	-	-	-	-	-	-	-	-	-	-	-	-	-	-	-	-	-	-	-	-	1	-	-	-	-	-	-	1	-
111	yjm1387_Chr15_1037671_1083377_14	509 aa	None	-	yjm1523NODE_1405_length_1539_cov_18.558804	69.8	500	0	>emb|CAY86676.1| EC1118_1O4_6546p [Saccharomyces cerevisiae EC1118]	Length=504	Identities = 504/504 (100%), Positives = 504/504 (100%), Gaps = 0/504 (0%)	-	-	-	-	-	-	-	-	-	-	-	-	-	-	-	-	-	-	-	-	-	-	-	-	-	-	-	-	-	1	-	-	-	-	-	-	1	-
112	yjm1387_Chr15_1037671_1083377_15	244 aa	None	-	Sarb_chr08	68.22	214	7e-170	>emb|CAY86674.1| Sod2p [Saccharomyces cerevisiae EC1118]	Length=232	Identities = 232/232 (100%), Positives = 232/232 (100%), Gaps = 0/232 (0%)	-	-	-	-	-	-	-	-	-	-	-	-	-	-	-	-	-	-	-	-	-	-	-	-	-	-	-	-	-	1	-	-	-	-	-	-	1	-
113	yjm1387_Chr15_1037671_1083377_18	685 aa	None	-	Port26	23.64	461	0	>emb|CAY86670.1| EC1118_1O4_6480p [Saccharomyces cerevisiae EC1118]	Length=595	Identities = 595/595 (100%), Positives = 595/595 (100%), Gaps = 0/595 (0%)	-	-	-	-	-	-	-	-	-	-	-	-	-	-	-	-	-	-	-	-	-	-	-	-	1	-	-	-	-	1	-	-	-	-	-	-	-	-
114	yjm1387_Chr15_1037671_1083377_19	542 aa	None	-	Smik8	50.74	471	0	>ref|XP_003680115.1| hypothetical protein TDEL_0C00150 [Torulaspora delbrueckii]	Length=526	Identities = 397/526 (75%), Positives = 454/526 (86%), Gaps = 0/526 (0%)	-	-	-	-	-	-	-	-	-	-	-	-	-	-	-	-	-	-	-	-	-	-	-	-	-	-	-	-	-	1	-	-	-	-	-	-	-	-
115	yjm1387_Chr15_1037671_1083377_20	220 aa	None	-	Port181	35.94	64	-	++++NoSignigicantHits++++	-	-	-	-	-	-	-	-	-	-	-	-	-	-	-	-	-	-	-	-	-	-	-	-	-	-	-	-	-	-	-	1	-	-	-	-	-	-	-	-
116	yjm1388_Chr11_1887_3634_3	326 aa	None	-	-	-	-	-	++++NoSignigicantHits++++	-	-	-	-	-	-	-	-	-	-	-	-	-	-	-	-	-	-	-	-	-	-	-	-	-	-	-	-	-	-	-	1	-	-	-	-	-	-	-	-
117	yjm1399_Chr06_239686_249313_2	912 aa	None	-	yjm1524NODE_3930_length_4768_cov_5.685612	98.61	433	-	++++NoSignigicantHits++++	-	-	-	-	-	-	-	-	-	-	-	-	-	-	-	-	-	-	-	-	-	-	-	-	-	-	-	-	-	-	-	-	-	-	1	-	-	-	-	-
118	yjm1399_Chr08_504621_509988_1	343 aa	None	-	yjm1519NODE_971_length_11474_cov_308.110687	99.13	343	0	>gb|EDZ71605.1| YHR210Cp-like protein [Saccharomyces cerevisiae AWRI1631]	Length=341	Identities = 292/341 (86%), Positives = 316/341 (93%), Gaps = 0/341 (0%)	-	-	-	-	-	-	-	-	-	-	-	-	-	-	-	-	-	-	-	-	-	-	-	1	-	-	-	-	-	-	-	-	1	-	-	-	-	-
119	yjm1400_Chr06_284401_293348_1	221 aa	None	-	Smik45	65.4	211	2e-57	>gb|EDN59792.1| suppressor of sulfoxyde ethionine resistance [Saccharomyces cerevisiae	Length=593	Identities = 95/146 (65%), Positives = 112/146 (77%), Gaps = 2/146 (1%)	-	-	-	-	-	-	-	-	-	-	-	-	-	-	-	-	-	-	-	-	-	-	-	-	-	-	-	-	-	-	-	-	-	1	-	-	-	-
120	yjm1400_Chr06_284401_293348_3	290 aa	None	-	Smik45	76.51	281	2e-57	>gb|EDN59792.1| suppressor of sulfoxyde ethionine resistance [Saccharomyces cerevisiae	Length=593	Identities = 95/146 (65%), Positives = 112/146 (77%), Gaps = 2/146 (1%)	-	-	-	-	-	-	-	-	-	-	-	-	-	-	-	-	-	-	-	-	-	-	-	-	-	-	-	-	-	-	-	-	-	1	-	-	-	-
121	yjm1400_Chr06_284401_293348_5	331 aa	None	-	Smik45	61.49	309	-	++++NoSignigicantHits++++	-	-	-	-	-	-	-	-	-	-	-	-	-	-	-	-	-	-	-	-	-	-	-	-	-	-	-	-	-	-	-	-	-	-	-	1	-	-	-	-
122	yjm1400_Chr13_454736_456572_1	173 aa	None	-	yjm1523NODE_1436_length_850_cov_5.322353	83.43	175	-	++++NoSignigicantHits++++	-	-	-	-	-	-	-	-	-	-	-	-	-	-	-	-	-	-	-	-	-	-	-	-	-	-	-	-	-	-	-	-	-	-	-	1	-	-	-	-
123	yjm1400_Chr16_906687_909221_1	525 aa	None	-	Spar16	95.43	525	0	>gb|EDZ72420.1| YFL002W-Ap-like protein [Saccharomyces cerevisiae AWRI1631]	Length=460	Identities = 270/439 (62%), Positives = 334/439 (76%), Gaps = 0/439 (0%)	-	-	-	-	-	-	-	-	-	-	-	-	-	-	-	-	-	-	-	-	-	-	-	-	-	-	-	-	-	-	-	-	-	1	-	-	-	-
124	yjm1402_Chr07_405834_407581_1	240 aa	None	-	Spar1	57.38	237	1e-132	>emb|CAE52435.1| hypothetical protein [Saccharomyces cerevisiae]	Length=236	Identities = 200/236 (85%), Positives = 213/236 (90%), Gaps = 0/236 (0%)	-	-	-	-	-	-	-	-	-	-	-	-	-	-	-	-	-	-	-	-	-	-	-	-	-	-	-	-	-	-	-	-	-	-	-	1	-	-
125	yjm1402_Chr13_778864_781398_1	225 aa	None	-	yjm1524NODE_6453_length_1819_cov_3.875206	91.04	212	-	++++NoSignigicantHits++++	-	-	-	-	-	-	-	-	-	-	-	-	-	-	-	-	-	-	-	-	-	-	-	-	-	-	-	-	-	-	-	-	-	-	-	-	-	1	-	-
126	yjm1415_Chr15_1033936_1063523_14	596 aa	None	-	Skud6	33.33	63	0	>emb|CAY86673.1| EC1118_1O4_6513p [Saccharomyces cerevisiae EC1118]	Length=584	Identities = 580/584 (99%), Positives = 583/584 (99%), Gaps = 0/584 (0%)	-	-	1	-	-	-	-	-	-	-	-	-	-	-	-	-	-	-	1	-	-	-	-	-	1	-	-	-	-	1	-	-	-	-	-	-	1	-
127	yjm1415_Chr15_1064599_1084633_1	575 aa	None	-	Sbay11	79	562	0	>emb|CAY86682.1| EC1118_1O4_6634p [Saccharomyces cerevisiae EC1118]	Length=566	Identities = 566/566 (100%), Positives = 566/566 (100%), Gaps = 0/566 (0%)	-	-	-	-	-	-	-	-	-	-	-	-	-	-	-	-	-	-	-	-	-	-	-	-	-	-	-	-	-	1	-	-	-	-	-	-	1	-
128	yjm1415_Chr15_1064599_1084633_2	272 aa	None	-	Sbay69	26.67	150	4e-153	>gb|EDZ68613.1| hypothetical protein AWRI1631_10970060 [Saccharomyces cerevisiae	Length=210	Identities = 210/210 (100%), Positives = 210/210 (100%), Gaps = 0/210 (0%)	-	-	-	-	-	-	-	-	-	-	-	-	-	-	-	-	-	-	-	-	-	-	-	-	-	-	-	-	-	1	-	-	-	-	-	-	1	-
129	yjm1415_Chr15_1064599_1084633_3	500 aa	None	-	Sbay115	47	217	0	>emb|CAY86683.1| EC1118_1O4_6645p [Saccharomyces cerevisiae EC1118]	Length=477	Identities = 477/477 (100%), Positives = 477/477 (100%), Gaps = 0/477 (0%)	-	-	-	-	-	-	-	-	-	-	-	-	-	-	-	-	-	-	-	-	-	-	-	-	-	-	-	-	-	-	-	-	-	-	-	-	1	-
130	yjm1415_Chr15_1064599_1084633_4	1450 aa	None	-	Sbay80	46.55	348	0	>emb|CAY86684.1| EC1118_1O4_6656p [Saccharomyces cerevisiae EC1118]	Length=1445	Identities = 1445/1445 (100%), Positives = 1445/1445 (100%), Gaps = 0/1445 (0%)	-	-	-	-	-	-	-	-	-	-	-	-	-	-	-	-	-	-	-	-	-	-	-	-	-	-	-	-	-	1	-	-	-	-	-	-	1	-
131	yjm1415_Chr15_1064599_1084633_6	185 aa	None	-	Sbay1	28.07	57	-	***** No hits found *****	-	-	-	-	-	-	-	-	-	-	-	-	-	-	-	-	-	-	-	-	-	-	-	-	-	-	-	-	-	-	-	1	-	-	-	-	-	-	1	-
132	yjm1415_Chr15_1064599_1084633_7	368 aa	None	-	-	-	-	1e-157	>gb|EGA80310.1| hypothetical protein QA23_5125 [Saccharomyces cerevisiae Lalvin	Length=246	Identities = 243/243 (100%), Positives = 243/243 (100%), Gaps = 0/243 (0%)	-	-	-	-	-	-	-	-	-	-	-	-	-	-	-	-	-	-	-	-	-	-	-	-	-	-	-	-	-	1	-	-	-	-	-	-	1	-
133	yjm1418_Chr01_166030_168707_1	223 aa	None	-	Spar1	79.41	136	8e-163	>emb|CAE52434.1| hypothetical protein [Saccharomyces cerevisiae]	Length=221	Identities = 221/221 (100%), Positives = 221/221 (100%), Gaps = 0/221 (0%)	-	-	-	-	-	-	-	-	-	-	-	-	-	-	-	-	-	-	-	-	-	-	-	-	-	-	-	-	-	-	-	-	-	-	-	1	-	-
134	yjm1419_Chr05_564392_585304_2	155 aa	None	-	Sarb_chr10	29.82	57	-	++++NoSignigicantHits++++	-	-	-	-	-	-	-	-	-	-	-	-	-	-	-	-	-	-	-	-	-	-	-	-	-	-	-	-	-	-	-	-	-	-	-	-	-	-	-	-
135	yjm1419_Chr05_564392_585304_4	274 aa	None	-	-	-	-	-	***** No hits found *****	-	-	-	-	-	-	-	-	-	-	-	-	-	-	-	-	-	-	-	-	-	-	-	-	-	-	-	-	-	-	-	-	-	-	-	-	-	-	-	-
136	yjm1419_Chr05_564392_585304_5	780 aa	None	-	Spar5	31.72	725	0	>ref|XP_003683070.1| hypothetical protein TDEL_0G04920 [Torulaspora delbrueckii]	Length=696	Identities = 312/701 (45%), Positives = 425/701 (61%), Gaps = 23/701 (3%)	-	-	-	-	-	-	-	-	-	-	-	-	-	-	-	-	-	-	-	-	-	-	-	-	-	-	-	-	-	-	-	-	-	-	-	-	-	-
137	yjm1419_Chr05_564392_585304_6	258 aa	None	-	yjm1519NODE_1163_length_1029_cov_700.978638	45.95	37	-	++++NoSignigicantHits++++	-	-	-	-	-	-	-	-	-	-	-	-	-	-	-	-	-	-	-	-	-	-	-	-	-	-	-	-	-	-	-	-	-	-	-	-	-	-	-	-
138	yjm1419_Chr07_3766_5536_1	247 aa	None	-	yjm1519NODE_1488_length_2393_cov_319.997070	94.67	244	1e-149	>gb|EGA79328.1| YGL262W-like protein [Saccharomyces cerevisiae Vin13]	Length=359	Identities = 215/217 (99%), Positives = 215/217 (99%), Gaps = 0/217 (0%)	-	-	-	-	-	-	-	-	-	-	1	-	-	-	-	-	-	-	-	-	-	-	-	-	-	-	-	-	-	-	-	-	-	-	-	-	-	-
139	yjm1434_Chr12_7378_12563_2	603 aa	None	-	yjm1523NODE_3073_length_2253_cov_6.750998	96.97	33	3e-58	>ref|XP_004022603.1| PREDICTED: protein FAM48A-like [Ovis aries]	Length=1157	Identities = 195/396 (49%), Positives = 233/396 (59%), Gaps = 40/396 (10%)	-	-	-	-	-	-	-	-	-	-	-	-	-	-	-	-	-	-	-	-	-	-	-	-	-	-	-	-	-	-	-	-	-	-	-	-	-	-
140	yjm1434_Chr12_7378_12563_3	524 aa	None	-	-	-	-	-	++++NoSignigicantHits++++	-	-	-	-	-	-	-	-	-	-	-	-	-	-	-	-	-	-	-	-	-	-	-	-	-	-	-	-	-	-	-	-	-	-	-	-	-	-	-	-
141	yjm1439_Chr09_178599_182323_1	814 aa	None	-	Smik57	28.27	796	0	>emb|CBK52122.1| hypothetical protein [Saccharomyces bayanus]	Length=795	Identities = 742/795 (93%), Positives = 768/795 (97%), Gaps = 1/795 (0%)	-	-	-	-	-	1	1	1	-	-	-	-	-	-	1	-	-	-	-	-	-	-	-	1	1	-	-	-	1	-	-	-	-	-	-	-	-	-
142	yjm1444_Chr01_169036_175131_1	283 aa	None	-	Spar1	95.41	283	3e-108	>emb|CAE52450.1| Prm9p [Saccharomyces cerevisiae]	Length=299	Identities = 157/272 (58%), Positives = 197/272 (72%), Gaps = 1/272 (0%)	-	-	-	-	-	-	-	-	-	-	-	-	-	-	-	-	-	-	-	-	-	-	-	-	-	-	-	-	-	-	-	-	-	-	-	-	-	-
143	yjm1444_Chr10_15220_17539_1	393 aa	None	-	Spar10	76.98	391	0	>gb|EEU05344.1| Cos2p [Saccharomyces cerevisiae JAY291]	Length=379	Identities = 379/379 (100%), Positives = 379/379 (100%), Gaps = 0/379 (0%)	-	-	-	-	-	-	-	-	-	-	-	-	-	-	-	-	-	-	-	-	-	-	-	-	-	-	-	-	-	-	-	-	-	-	-	-	-	-
144	yjm1444_Chr10_22137_45755_3	548 aa	None	-	Sarb_chr02	58.68	547	0	>ref|XP_002553511.1| KLTH0E00528p [Lachancea thermotolerans]	Length=552	Identities = 325/543 (60%), Positives = 408/543 (75%), Gaps = 11/543 (2%)	-	-	-	-	-	-	-	-	-	-	-	1	-	-	-	-	-	-	-	-	-	-	-	-	-	-	-	-	-	-	-	-	-	-	-	-	-	-
145	yjm1444_Chr10_22137_45755_4	670 aa	None	-	Smik9	42.86	77	0	>gb|EEU05583.1| hypothetical protein C1Q_05659 [Saccharomyces cerevisiae JAY291]	Length=644	Identities = 637/644 (99%), Positives = 643/644 (99%), Gaps = 0/644 (0%)	-	-	-	-	-	-	-	-	-	-	-	-	-	-	-	-	-	-	-	-	-	-	-	-	-	-	-	-	-	-	-	-	-	-	-	-	-	-
146	yjm1444_Chr10_22137_45755_9	491 aa	None	-	Smik42	86.84	456	0	>sp|Q09187.1|MEL_SACPA RecName: Full=Alpha-galactosidase; AltName: Full=Alpha-D-galactoside	Length=471	Identities = 444/471 (94%), Positives = 451/471 (96%), Gaps = 0/471 (0%)	-	-	-	-	-	-	-	-	-	-	-	1	-	-	-	-	-	-	-	-	-	-	1	-	-	-	-	-	-	-	-	-	-	-	-	-	-	-
147	yjm1444_Chr15_548_7689_1	181 aa	None	-	Smik53	55.31	179	1e-66	>gb|EGA72500.1| hypothetical protein AWRI796_5161 [Saccharomyces cerevisiae AWRI796]	Length=316	Identities = 108/157 (69%), Positives = 127/157 (81%), Gaps = 4/157 (3%)	-	-	-	-	-	-	-	-	-	-	-	-	-	-	-	-	-	-	-	-	-	-	-	-	-	-	-	-	-	-	-	-	-	-	-	-	-	-
148	yjm1450_Chr15_982432_985187_1	237 aa	None	-	Skud44	71.11	135	8e-161	>gb|EGA60513.1| hypothetical protein FOSTERSO_4311 [Saccharomyces cerevisiae	Length=263	Identities = 218/222 (98%), Positives = 219/222 (99%), Gaps = 0/222 (0%)	-	-	-	-	-	-	-	-	-	-	-	-	-	-	-	1	-	-	-	-	-	-	-	-	-	-	-	-	-	1	1	1	-	1	1	-	-	-
149	yjm1460_Chr10_295_1946_1	217 aa	None	-	yjm1524NODE_2279_length_159_cov_115.786163	75	20	-	***** No hits found *****	-	-	-	-	-	-	-	-	-	-	-	-	-	-	-	-	-	-	-	-	-	-	-	-	-	-	-	-	-	-	-	-	-	-	-	-	-	-	-	-
150	yjm1478_Chr03_240_41236_1	407 aa	None	-	Sbay16	27.49	251	0	>emb|CAY79379.1| EC1118_1F14_0023p [Saccharomyces cerevisiae EC1118]	Length=405	Identities = 405/405 (100%), Positives = 405/405 (100%), Gaps = 0/405 (0%)	-	-	-	-	-	-	-	-	-	-	-	-	-	-	-	-	-	-	-	-	-	-	-	-	-	-	-	-	-	-	-	-	-	-	-	-	-	-
151	yjm1478_Chr03_240_41236_2	580 aa	None	-	Sbay11	29.78	450	0	>emb|CAY79380.1| EC1118_1F14_0034p [Saccharomyces cerevisiae EC1118]	Length=567	Identities = 567/567 (100%), Positives = 567/567 (100%), Gaps = 0/567 (0%)	-	-	-	-	-	-	-	-	-	-	-	-	-	-	-	-	-	-	-	-	-	-	-	-	-	-	-	-	-	-	-	-	-	-	-	-	-	-
152	yjm1478_Chr03_240_41236_5	393 aa	None	-	Sarb_chr10	47.06	374	0	>gb|EHN03978.1| YJR149W-like protein [Saccharomyces cerevisiae x Saccharomyces	Length=382	Identities = 382/382 (100%), Positives = 382/382 (100%), Gaps = 0/382 (0%)	-	-	-	-	-	-	-	-	-	-	-	-	-	-	-	-	-	-	-	-	-	-	-	-	-	-	-	-	-	-	-	-	-	-	-	-	-	-
153	yjm1478_Chr03_240_41236_6	513 aa	None	-	yjm1519NODE_1261_length_6900_cov_302.225220	86.09	496	0	>emb|CAY79388.1| EC1118_1F14_0144p [Saccharomyces cerevisiae EC1118]	Length=495	Identities = 495/495 (100%), Positives = 495/495 (100%), Gaps = 0/495 (0%)	-	-	-	-	-	-	-	-	-	-	-	-	-	-	-	-	-	-	-	-	-	-	-	-	-	-	-	-	-	-	-	-	-	-	-	-	-	-
154	yjm1478_Chr03_240_41236_7	321 aa	None	-	Sarb_chr13.rev	26.45	121	0	>emb|CAY79387.1| EC1118_1F14_0133p [Saccharomyces cerevisiae EC1118]	Length=269	Identities = 269/269 (100%), Positives = 269/269 (100%), Gaps = 0/269 (0%)	-	-	-	-	-	-	-	-	-	-	-	-	-	-	-	-	-	-	-	-	-	-	-	-	-	-	-	-	-	-	-	-	-	-	-	-	-	-
155	yjm1478_Chr03_240_41236_8	566 aa	None	-	Sbay20	44.78	536	0	>emb|CAY79386.1| EC1118_1F14_0111p [Saccharomyces cerevisiae EC1118]	Length=564	Identities = 564/564 (100%), Positives = 564/564 (100%), Gaps = 0/564 (0%)	-	-	-	-	-	-	-	-	-	-	-	-	-	-	-	-	-	-	-	-	-	-	-	-	-	-	-	-	-	-	-	-	-	-	-	-	-	-
156	yjm1478_Chr03_240_41236_9	458 aa	None	-	Sbay2	27.38	168	0	>gb|EHN03971.1| hypothetical protein VIN7_5240 [Saccharomyces cerevisiae x Saccharomyces	Length=446	Identities = 446/446 (100%), Positives = 446/446 (100%), Gaps = 0/446 (0%)	-	-	-	-	-	-	-	-	-	-	-	-	-	-	-	-	-	-	-	-	-	-	-	-	-	-	-	-	-	-	-	-	-	-	-	-	-	-
157	yjm1478_Chr03_240_41236_10	623 aa	None	-	Sarb_chr04	25.95	655	0	>emb|CAY79383.1| EC1118_1F14_0078p [Saccharomyces cerevisiae EC1118]	Length=603	Identities = 603/603 (100%), Positives = 603/603 (100%), Gaps = 0/603 (0%)	-	-	-	-	-	-	-	-	-	-	-	-	-	-	-	-	-	-	-	-	-	-	-	-	-	-	-	-	-	-	-	-	-	-	-	-	-	-
158	yjm1478_Chr03_240_41236_11	455 aa	None	-	Skud1	37.29	59	0	>gb|EGA80285.1| hypothetical protein QA23_5166 [Saccharomyces cerevisiae Lalvin	Length=350	Identities = 350/350 (100%), Positives = 350/350 (100%), Gaps = 0/350 (0%)	-	-	-	-	-	-	-	-	-	-	-	-	-	-	-	-	-	-	-	-	-	-	-	-	-	-	-	-	-	-	-	-	-	-	-	-	-	-
159	yjm1478_Chr03_240_41236_12	703 aa	None	-	Sbay3	66.1	702	0	>emb|CAY79382.1| EC1118_1F14_0056p [Saccharomyces cerevisiae EC1118]	Length=702	Identities = 702/702 (100%), Positives = 702/702 (100%), Gaps = 0/702 (0%)	-	-	-	-	-	-	-	-	-	-	-	-	-	-	-	-	-	-	-	-	-	-	-	-	-	-	-	-	-	-	-	-	-	-	-	-	-	-
160	yjm1478_Chr03_240_41236_13	346 aa	None	-	Skud18	52.23	337	0	>emb|CAY79381.1| EC1118_1F14_0045p [Saccharomyces cerevisiae EC1118]	Length=342	Identities = 342/342 (100%), Positives = 342/342 (100%), Gaps = 0/342 (0%)	-	-	-	-	-	-	-	-	-	-	-	-	-	-	-	-	-	-	-	-	-	-	-	-	-	-	-	-	-	-	-	-	-	-	-	-	-	-
161	yjm1478_Chr03_240_41236_14	514 aa	None	-	Sarb_chr16	30.77	78	0	>emb|CAY79381.1| EC1118_1F14_0045p [Saccharomyces cerevisiae EC1118]	Length=342	Identities = 342/342 (100%), Positives = 342/342 (100%), Gaps = 0/342 (0%)	-	-	-	-	-	-	-	-	-	-	-	-	-	-	-	-	-	-	-	-	-	-	-	-	-	-	-	-	-	-	-	-	-	-	-	-	-	-
162	yjm1478_Chr03_240_41236_15	537 aa	None	-	Sbay9	31.72	309	0	>emb|CAY79377.1| EC1118_1F14_0001p [Saccharomyces cerevisiae EC1118]	Length=478	Identities = 477/478 (99%), Positives = 478/478 (100%), Gaps = 0/478 (0%)	-	-	-	-	-	-	-	-	-	-	-	-	-	-	-	-	-	-	-	-	-	-	-	-	-	-	-	-	-	-	-	-	-	-	-	-	-	-
163	yjm1574_Chr12_1619456_1637372_5	657 aa	None	-	Smik3	23.88	201	0	>gb|EEU07466.1| hypothetical protein C1Q_05654 [Saccharomyces cerevisiae JAY291]	Length=653	Identities = 652/656 (99%), Positives = 652/656 (99%), Gaps = 3/656 (0%)	-	1	1	-	1	-	-	-	-	-	-	1	-	-	-	-	1	-	-	-	-	-	-	1	-	-	1	1	-	-	-	-	-	-	-	-	1	-
164	yjm195_Chr16_51149_51854_1	171 aa	None	-	Spar11	80.15	136	3e-93	>prf||2205370A K28 prepro-toxin	Length=345	Identities = 141/171 (82%), Positives = 154/171 (90%), Gaps = 1/171 (1%)	-	-	-	-	-	-	-	-	-	-	-	-	-	-	-	-	-	-	-	-	-	-	-	-	-	-	-	-	-	-	-	-	-	-	-	-	-	-
165	yjm326_Chr07_949800_953170_1	479 aa	None	-	yjm1519NODE_1929_length_3840_cov_312.409363	93.7	460	0	>gb|EHN02185.1| Mal33p [Saccharomyces cerevisiae x Saccharomyces kudriavzevii	Length=462	Identities = 397/452 (88%), Positives = 422/452 (93%), Gaps = 0/452 (0%)	-	-	-	1	1	-	-	1	-	-	1	-	-	1	-	-	-	-	-	-	1	-	1	-	-	-	-	-	-	-	-	-	1	1	-	1	-	-
166	yjm450_Chr08_513578_515589_1	440 aa	None	-	Spar8	33.33	132	0	>ref|XP_003683077.1| hypothetical protein TDEL_0G04990 [Torulaspora delbrueckii]	Length=816	Identities = 306/431 (71%), Positives = 360/431 (84%), Gaps = 1/431 (0%)	-	-	-	-	-	-	-	-	-	-	-	-	-	-	-	-	-	-	-	-	-	-	-	-	-	-	-	-	-	-	-	-	-	-	-	-	-	-
167	yjm450_Chr12_332_11468_2	670 aa	None	-	Smik39	43.26	319	0	>ref|XP_003683523.1| hypothetical protein TDEL_0H04530 [Torulaspora delbrueckii]	Length=1213	Identities = 618/670 (92%), Positives = 645/670 (96%), Gaps = 2/670 (0%)	-	-	-	-	-	-	-	-	-	-	-	-	-	-	-	-	-	-	-	-	-	-	-	-	-	-	-	-	-	-	-	-	-	-	-	-	-	-
168	yjm450_Chr12_332_11468_3	176 aa	None	-	yjm1523NODE_5856_length_5402_cov_4.642169	32.56	43	-	++++NoSignigicantHits++++	-	-	-	-	-	-	-	-	-	-	-	-	-	-	-	-	-	-	-	-	-	-	-	-	-	-	-	-	-	-	-	-	-	-	-	-	-	-	-	-
169	yjm470_Chr07_9617_15121_1	211 aa	None	-	Sarb_chr14.rev	87.68	211	6e-98	>gb|EGA72491.1| hypothetical protein AWRI796_5152 [Saccharomyces cerevisiae AWRI796]	Length=349	Identities = 145/199 (73%), Positives = 161/199 (81%), Gaps = 0/199 (0%)	-	-	-	-	-	-	-	-	-	-	-	-	-	-	-	-	-	-	-	-	-	-	-	-	-	-	-	-	-	-	-	-	-	-	-	-	-	-
170	yjm555_Chr06_25310_29794_3	1075 aa	None	-	Spar6	73.75	259	5e-83	>gb|EHN02628.1| Flo10p [Saccharomyces cerevisiae x Saccharomyces kudriavzevii	Length=757	Identities = 132/185 (71%), Positives = 155/185 (84%), Gaps = 0/185 (0%)	-	-	-	-	-	-	-	-	-	-	-	-	-	-	-	-	-	-	-	-	-	-	-	-	-	-	-	-	-	-	-	-	-	-	-	-	-	-
From 93 Strains; sequence present in S288C but not annotated
171	yjm1078_Chr04_1117243_1119846_1	184 aa	90.2	183	Spar4	98.37	184	2e-89	>gb|EGA79329.1| hypothetical protein VIN13_1042 [Saccharomyces cerevisiae Vin13]	Length=195	Identities = 135/155 (87%), Positives = 138/155 (89%), Gaps = 0/155 (0%)	1	-	-	-	-	-	-	-	-	-	-	-	1	-	-	-	-	-	-	-	-	-	-	-	-	-	-	-	-	-	-	-	-	-	-	-	-	-
172	yjm1083_Chr02_347118_348245_1	165 aa	97.6	165	Spar2	50.3	169	4e-81	>gb|EGA75920.1| hypothetical protein AWRI796_0230 [Saccharomyces cerevisiae AWRI796]	Length=151	Identities = 121/129 (94%), Positives = 122/129 (95%), Gaps = 0/129 (0%)	-	1	-	-	-	-	-	-	-	-	-	-	-	-	-	-	-	-	-	-	-	-	-	-	-	-	-	-	-	-	-	-	-	-	1	-	-	-
173	yjm1083_Chr06_245093_247501_1	166 aa	98.2	166	Spar6	58.26	115	-	***** No hits found *****	-	-	-	1	1	1	1	1	1	1	1	1	-	1	-	1	1	1	1	1	1	1	1	1	1	1	1	1	1	-	1	1	1	1	-	1	1	1	1	1
174	yjm1083_Chr07_1013271_1014368_1	177 aa	100	177	yjm1524NODE_7500_length_10212_cov_4.962593	60	110	-	++++NoSignigicantHits++++	-	-	1	1	1	1	1	1	1	1	1	1	1	1	1	1	1	1	1	1	1	1	1	1	1	1	1	1	1	1	1	1	1	1	-	1	1	1	1	1
175	yjm1133_Chr13_335504_336235_1	205 aa	98.6	207	Spar13	75.53	94	-	***** No hits found *****	-	-	-	-	-	1	-	1	-	-	-	-	-	-	-	-	-	-	-	-	-	-	-	-	-	-	-	-	-	-	-	-	-	-	-	-	-	-	-	-
176	yjm1133_Chr14_54849_56032_1	226 aa	97.8	226	Spar14	49.23	195	7e-80	>gb|EDZ69876.1| hypothetical protein AWRI1631_140320 [Saccharomyces cerevisiae	Length=123	Identities = 117/123 (95%), Positives = 119/123 (97%), Gaps = 0/123 (0%)	1	-	1	1	-	1	1	-	1	1	-	-	1	1	-	1	-	-	1	-	1	-	-	-	1	-	-	-	-	1	-	-	-	-	1	-	1	-
177	yjm1190_Chr14_59388_60574_1	185 aa	96.7	182	Spar14	58.91	129	-	++++NoSignigicantHits++++	-	-	-	-	-	-	1	-	-	-	-	-	-	1	-	-	1	-	-	1	-	1	-	1	-	-	-	1	1	-	1	-	-	-	-	-	-	-	-	1
178	yjm1199_Chr06_138171_138899_1	242 aa	99.2	242	Spar6	71.37	248	4e-174	>dbj|GAA23094.1| K7_02300p [Saccharomyces cerevisiae Kyokai no. 7]	Length=465	Identities = 239/242 (99%), Positives = 240/242 (99%), Gaps = 0/242 (0%)	-	-	-	-	-	1	1	1	-	-	1	-	-	1	1	1	1	1	-	-	1	-	1	-	-	-	-	1	-	-	1	1	1	1	1	1	-	-
179	yjm1199_Chr11_578029_579110_1	177 aa	99.4	177	yjm1519NODE_703_length_34502_cov_283.049927	50.86	116	4e-78	>gb|EGA61507.1| hypothetical protein FOSTERSO_2965 [Saccharomyces cerevisiae	Length=178	Identities = 153/173 (88%), Positives = 158/173 (91%), Gaps = 1/173 (1%)	-	-	-	-	-	1	-	-	-	-	-	-	-	-	-	-	-	-	-	-	-	-	-	-	-	1	-	-	-	-	-	-	-	-	-	-	-	-
180	yjm1208_Chr07_961157_962254_1	176 aa	99.4	177	yjm1523NODE_6047_length_6036_cov_5.225977	54.11	146	-	++++NoSignigicantHits++++	-	-	-	1	1	1	1	1	1	1	-	-	1	-	-	1	1	-	1	-	-	-	1	-	1	-	-	-	1	1	-	-	1	1	-	1	1	1	-	-
181	yjm1208_Chr11_324086_324768_1	165 aa	94.6	92	yjm1524NODE_10040_length_277_cov_2.436823	83.87	31	-	++++NoSignigicantHits++++	-	-	-	-	-	-	1	-	1	1	-	-	-	-	-	1	-	-	1	1	-	-	-	-	-	-	-	-	-	-	1	-	-	-	-	1	1	1	-	-
182	yjm1248_Chr07_428157_429311_1	168 aa	96.4	168	Spar7	45.98	174	-	++++NoSignigicantHits++++	-	-	-	-	-	-	-	-	-	-	-	-	1	-	-	-	-	-	-	-	-	-	-	-	-	-	-	-	-	-	-	-	-	1	-	1	-	-	-	-
183	yjm1252_Chr07_965607_967325_1	156 aa	100	156	yjm1523NODE_3107_length_1270_cov_3.437795	93.88	49	-	++++NoSignigicantHits++++	-	-	1	-	-	-	-	-	-	-	-	-	-	-	1	-	-	-	-	-	-	-	-	-	-	-	-	-	-	-	-	-	-	-	-	-	-	-	-	-
184	yjm1252_Chr15_3288_4120_1	156 aa	95.9	74	4004FM1318	35.11	94	-	++++NoSignigicantHits++++	-	-	-	-	-	-	-	-	-	-	-	-	-	-	1	-	-	-	-	-	-	-	-	-	-	-	-	-	-	-	-	-	-	-	-	-	-	-	-	-
185	yjm1273_Chr07_631286_631963_1	171 aa	98.8	171	Skud30	50	144	-	++++NoSignigicantHits++++	-	-	-	1	-	1	-	-	-	-	-	-	-	-	-	1	-	-	-	-	-	-	1	-	1	1	-	-	1	1	-	-	1	-	-	-	-	1	-	-
186	yjm1273_Chr08_503024_503684_1	164 aa	98.8	164	yjm1519NODE_217_length_6040_cov_335.628326	73.43	143	-	***** No hits found *****	-	-	1	1	1	1	1	1	1	1	1	1	1	1	1	1	1	1	1	1	1	1	1	1	1	1	1	1	1	1	1	1	1	1	1	1	1	1	1	1
187	yjm1307_Chr06_236094_239973_1	153 aa	99.3	153	Smik4	42.86	56	-	++++NoSignigicantHits++++	-	-	-	-	1	-	-	-	1	1	1	1	-	1	-	-	-	1	-	1	1	1	-	1	-	1	1	1	1	1	1	1	-	-	-	-	-	-	1	1
188	yjm1336_Chr11_391585_392628_1	164 aa	96.3	164	Spar11	55.36	112	-	***** No hits found *****	-	-	1	-	-	-	-	-	-	1	-	-	1	-	-	-	-	-	1	-	1	1	-	1	1	-	1	1	-	-	1	-	1	1	-	1	1	-	-	-
189	yjm1342_Chr11_386030_387061_1	168 aa	98.2	170	yjm1524NODE_8625_length_2092_cov_4.025335	80.39	51	-	***** No hits found *****	-	-	-	-	-	1	1	-	-	-	-	-	1	1	-	1	1	-	-	-	-	1	-	-	1	-	-	-	-	-	1	-	1	1	-	-	-	-	-	-
190	yjm1381_Chr01_170706_172321_1	152 aa	99.3	152	Spar1	38.24	136	-	++++NoSignigicantHits++++	-	-	1	1	1	1	1	1	1	1	1	1	-	1	1	1	1	1	1	1	1	1	1	1	1	1	1	1	-	1	1	1	-	1	-	1	1	1	1	1
191	yjm1385_Chr15_3963_4538_1	152 aa	95.4	153	Sbay50	82.61	115	-	++++NoSignigicantHits++++	-	-	1	-	1	-	1	-	-	1	-	1	-	-	1	1	-	1	-	1	-	1	-	-	1	1	1	1	1	1	1	-	1	-	-	1	-	1	-	-
192	yjm1399_Chr05_158785_161286_1	154 aa	94.4	160	yjm1524NODE_14744_length_1744_cov_2.755734	28.35	127	-	***** No hits found *****	-	-	1	1	1	1	1	1	1	1	1	1	1	1	1	1	1	1	1	1	1	1	1	1	1	1	1	1	1	1	1	1	1	1	1	1	1	1	1	1
193	yjm1400_Chr07_949493_950839_1	180 aa	93.9	180	Spar7	64.8	179	-	++++NoSignigicantHits++++	-	-	1	-	1	1	1	1	1	1	1	1	1	1	1	-	-	1	1	1	1	-	-	1	-	1	1	-	1	1	1	1	-	-	1	1	-	-	1	1
194	yjm1402_Chr11_9113_12373_1	160 aa	99.4	160	Spar11	34.21	152	-	++++NoSignigicantHits++++	-	-	-	-	-	-	-	-	-	-	-	-	-	-	-	-	-	-	-	-	-	-	-	-	-	-	-	-	-	-	-	-	-	-	-	-	-	1	-	-
195	yjm1418_Chr04_573754_574867_1	199 aa	96	200	Spar4	55.42	83	-	++++NoSignigicantHits++++	-	-	1	1	-	1	1	-	-	-	-	-	1	1	1	1	1	1	-	-	1	1	1	-	1	1	-	1	1	1	1	1	1	1	1	1	1	1	-	-
196	yjm1418_Chr13_287292_289191_1	151 aa	98	151	Spar13	68.57	105	-	++++NoSignigicantHits++++	-	-	1	1	1	1	1	1	1	1	1	1	1	1	1	1	1	1	1	1	1	1	1	1	1	1	1	1	1	1	1	1	1	1	1	1	1	1	1	1
197	yjm1460_Chr12_1885535_1886716_1	174 aa	100	174	yjm1523NODE_4347_length_701_cov_4.068474	64.94	174	-	***** No hits found *****	-	-	-	-	-	-	-	-	-	-	-	-	-	-	-	-	-	1	-	-	-	-	-	-	-	-	-	-	-	-	-	-	-	-	-	-	-	-	-	-
198	yjm1463_Chr04_1189784_1190637_1	166 aa	99.4	166	yjm1523NODE_4629_length_678_cov_4.949852	56.14	114	-	***** No hits found *****	-	-	1	1	1	1	-	1	1	-	1	1	-	1	1	-	-	1	1	1	1	1	-	1	-	1	1	1	-	-	1	-	-	-	-	-	-	-	1	1
199	yjm1463_Chr06_223429_225853_2	171 aa	97.1	171	yjm1519NODE_625_length_23910_cov_300.895203	44.37	151	-	++++NoSignigicantHits++++	-	-	-	1	1	1	1	1	1	1	1	1	1	1	-	1	1	1	1	1	1	1	1	1	1	1	1	1	1	1	1	1	1	1	-	1	1	1	1	1
200	yjm1574_Chr07_326914_328660_1	162 aa	90.7	162	Spar7	42.03	138	-	++++NoSignigicantHits++++	-	-	-	-	-	-	-	-	-	-	-	-	-	-	-	-	-	-	-	-	-	-	-	-	-	-	-	-	-	-	-	-	-	-	-	-	-	-	-	-
201	yjm193_Chr05_525794_526352_1	165 aa	99.4	165	yjm1519NODE_416_length_53568_cov_297.964020	78.05	82	-	***** No hits found *****	-	-	-	1	-	-	-	1	-	-	-	1	-	-	1	-	-	-	1	-	-	-	-	-	-	-	-	1	-	-	-	-	-	-	-	-	-	-	-	-
202	yjm195_Chr07_956030_957378_1	186 aa	95.7	186	yjm1519NODE_12_length_23624_cov_259.387909	57.69	156	-	++++NoSignigicantHits++++	-	-	-	-	-	-	-	-	-	-	-	-	-	-	-	-	-	-	-	-	-	-	-	-	-	-	-	-	-	-	-	-	-	-	-	-	-	-	-	-
203	yjm248_Chr05_498753_500361_1	164 aa	95.1	164	yjm1523NODE_7200_length_4858_cov_4.021614	39.43	175	-	++++NoSignigicantHits++++	-	-	1	1	1	1	-	1	1	-	1	1	-	1	-	-	-	1	1	1	1	1	1	1	-	1	1	1	1	1	1	1	1	1	1	-	-	1	1	1
204	yjm270_Chr14_482475_483420_1	153 aa	93.5	155	yjm1523NODE_6161_length_1942_cov_4.656025	38.13	139	-	++++NoSignigicantHits++++	-	-	-	-	-	1	-	-	-	-	-	1	-	1	-	-	-	-	-	-	-	-	-	-	-	-	-	1	-	-	-	-	-	-	-	-	-	-	-	-
205	yjm428_Chr05_525026_525578_1	163 aa	98.8	165	Spar5	69.33	150	-	***** No hits found *****	-	-	-	-	-	-	-	-	-	-	-	-	-	-	-	-	-	-	-	-	-	-	-	-	1	-	-	-	-	-	-	-	-	-	-	-	-	-	-	-
206	yjm451_Chr12_71616_72732_2	168 aa	94	168	Spar12	50.9	167	-	++++NoSignigicantHits++++	-	-	-	-	-	-	-	-	-	-	-	-	-	1	-	-	-	-	-	-	-	-	-	-	-	-	-	-	-	-	-	-	-	-	-	-	-	-	-	-
207	yjm451_Chr13_265165_266683_1	188 aa	98.4	188	yjm1523NODE_5587_length_3893_cov_3.545338	35.16	182	2e-109	>gb|EHN05267.1| hypothetical protein VIN7_3662 [Saccharomyces cerevisiae x Saccharomyces	Length=155	Identities = 154/155 (99%), Positives = 154/155 (99%), Gaps = 0/155 (0%)	1	1	1	1	1	1	1	1	1	1	1	1	1	1	1	1	1	1	1	1	1	1	1	1	1	1	1	-	1	1	1	1	1	1	1	1	1	1
208	yjm981_Chr08_854577_855229_1	177 aa	98.9	178	yjm1519NODE_217_length_6040_cov_335.628326	73.43	143	-	***** No hits found *****	-	-	1	1	1	1	1	1	1	1	1	1	1	1	1	1	1	1	1	1	1	1	1	1	1	1	1	1	1	1	1	1	1	1	1	1	1	1	1	1
Present in other Strains; sequence not in S288C
209	MEL1 (CBY84984)	471 aa	None	-	Sbay10	82.6	471	0	>gi|113501|sp|P04824.1|MEL1_YEASX RecName: Full=Alpha-galactosidase 1; AltName: Full=Alpha-D-galactoside galactohydrolase 1; AltName: Full=Melibiase 1;	Length=471	Identities = 471/471(100%), Positives = 471/471(100%), Gaps = 0/471(0%)	1	-	-	-	-	-	-	-	-	-	1	1	1	-	-	-	-	-	-	-	-	1	1	-	-	-	-	-	1	-	-	-	-	-	-	-	-	-
210	TAT3 (BAF57236)	557 aa	None	-	yjm1524NODE_7728_length_2588_cov_5.360897	95.9	557	0	>gi|146196899|dbj|BAF57236.1| tyrosine permease [Saccharomyces pastorianus]	Length=557	Identities = 557/557(100%), Positives = 557/557(100%), Gaps = 0/557(0%)	-	-	-	-	-	-	-	-	-	-	1	-	-	1	-	-	-	-	-	-	1	-	1	-	-	-	1	-	-	-	-	-	1	1	1	1	-	-
211	BIO6 (BAD90000)	437 aa	None	-	yjm1524NODE_1454_length_4529_cov_9.077059	94.3	437	0	>gi|60099448|dbj|BAD90000.1| Biotin biosynthesis enzyme [Saccharomyces cerevisiae]	Length=437	Identities = 437/437(100%), Positives = 437/437(100%), Gaps =0/437(0%)	-	-	-	-	-	-	-	1	-	-	1	-	-	-	-	1	-	-	-	-	-	-	-	1	-	-	1	1	-	1	1	-	1	1	1	-	-	-
212	BIO1 (ABQ63082)	346 aa	None	-	yjm1519NODE_763_length_6149_cov_636.059021	97.1	346	0	>gi|148372322|gb|ABQ63082.1| putative pimeloyl-CoA synthetase [Saccharomyces cerevisiae]	Length=346	Identities =346/346(100%), Positives = 346/346(100%), Gaps =0/346(0%)	-	-	-	-	-	-	-	1	-	-	1	-	-	-	-	1	-	-	-	-	-	-	-	1	-	-	1	1	-	1	1	-	1	1	1	-	-	-
213	RTM1 (AAA81533)	309 aa	None	-	yjm1524NODE_2505_length_3217_cov_5.626671	60.9	307	0	>gi|730689|sp|P40113.1|RTM1_YEASX RecName: Full=Protein RTM1	Length=309	Identities =309/309(100%), Positives = 309/309(100%), Gaps =0/309(0%)	-	-	-	-	-	1	1	1	-	-	1	-	-	-	1	-	-	-	-	-	-	-	-	1	1	-	-	-	1	-	-	-	-	1	1	-	-	-
214	MPR1 (BAA95611)	229 aa	None	-	yjm1523NODE_4827_length_3928_cov_5.549134	90.4	229	2e-168	>gi|524933097|pdb|3W6S|A Chain A, Yeast N-acetyltransferase Mpr1 Involved In Oxidative Stress Tolerance Via Proline Metabolism	Length=229	Identities =229/229(100%), Positives = 229/229(100%), Gaps =0/229(0%)	1	1	1	1	1	1	1	1	1	1	-	-	1	1	1	1	1	1	1	1	-	1	1	1	-	1	1	1	1	1	-	-	1	1	1	1	-	1
215	XDH1(259149877) paper see note	358 aa	79.3	358	Sarb_scaffold2_01	79.9	358	0	>gi|259149877|emb|CAY86681.1| EC1118_1O4_6623p [Saccharomyces cerevisiae EC1118]	Length=358	Identities = 358/358(100%), Positives = 358/358(100%), Gaps =0/358(0%)	-	-	-	-	-	-	-	-	-	-	-	-	-	-	-	-	-	-	-	-	-	-	-	-	-	-	-	-	-	1	-	-	-	-	-	-	1	-
216	FSY1 (Q9HFF8)	570 aa	None	-	3731FM1318 S. eubayanus	98.1	570	0	>gi|10129784|emb|CAC08232.1| fructose symporter [Saccharomyces pastorianus]	Length=570	Identities = 570/570(100%), Positives = 570/570(100%), Gaps =0/570(0%)	-	-	-	-	-	-	-	-	-	-	-	-	-	-	-	-	-	-	-	-	-	-	-	-	-	-	-	-	-	1	-	-	-	-	-	-	1	-
217	K28 (Q7LZU3_9VIRU)	345 aa	None	-	Spar11	83.7	203	0	>gi|1587118|prf||2205370A K28 prepro-toxin	Length=345	Identities =344/345(99%), Positives = 345/345(100%), Gaps =0/345(0%)	-	-	-	-	-	-	-	-	-	-	-	-	-	-	-	-	-	-	-	-	-	-	-	-	-	-	-	-	-	-	-	-	-	-	-	-	-	-
218	KHR (P22313)	296 aa	None	-	Sbay61	81.8	296	0	>gi|125388|sp|P22313.1|KHR1_YEASX RecName: Full=Killer toxin KHR; AltName: Full=Killer of heat resistant; Flags: Precursor	Length=296	Identities =296/296(100%), Positives = 296/296(100%), Gaps =0/296(0%)	-	1	1	-	1	-	-	-	1	-	1	-	-	1	1	1	-	1	1	1	1	1	1	-	1	-	-	1	1	1	-	-	-	1	1	1	1	1
219	KHS (EDN63163)	350 aa	88.57	350	Spar5	99.4	350	0	>gi|151944904|gb|EDN63163.1| hypothetical protein SCY_1690 [Saccharomyces cerevisiae YJM789]	Length=350	Identities =350/350(100%), Positives = 350/350(100%), Gaps =0/350(0%)	1	1	1	1	1	1	1	1	1	1	1	1	1	1	1	1	1	1	1	1	1	1	1	1	1	1	1	1	1	1	1	1	1	1	1	1	1	1
Note: XDH1(259149877) from the paper http://www.plosgenetics.org/article/info%3Adoi%2F10.1371%2Fjournal.pgen.1000942 see Fig S1 in that article Column B is the list of unique translated ORFs from the 93 strains but has no hit to s288c annotated gene sequences. Column D is the %ID in s288c (only >=75% ID selected), so the sequence is still present in s288c, just not annotated as a gene. Column F i…
[truncated: 56 more columns]
