# Supplementary material for: The 100-genomes strains, an S. cerevisiae resource that illuminates its natural phenotypic and genotypic variation and emergence as an opportunistic pathogen
Source: HighWire-hosted journal article supplement (doi:10.1101/gr.185538.114), 2015-04-03
Supplement: Table_S6.xlsx [file Table_S6.xlsx]

## Sheet: Sheet1
GO results for introgressed genes, deleted genes and genes with frameshifts and premature stop codons.
		GO-Slim term	Cluster frequency	Genome frequency	Chi Square p-value	Genes	Genes annotated to the term
Enriched
Introgressed
	Yeast GO-Slim Function
		transmembrane transporter activity	30 out of 401 genes, 7.5%	313 of 6335 genes, 4.9%	0.02	ADY2, AGP3, ATP3, CAN1, CTR2, FCY21, FUR4, GAL2, GAP1, GIT1, HXT10, HXT4, HXT5, OPT1, PDR11, PDR5, PHO89, QCR7,QCR8, QDR3, SIT1, SMF1, SUL1, TPO3, VBA2, VMA9, YDR338C, YFL054C, ZRT1, ZRT2
	Yeast GO-Slim Process
		cell wall organization or biogenesis	28 out of 401 genes, 7%	197 of 6335 genes, 3.1%	0.001	ADY3, CCW14, CWP1, CWP2, DIT2, ECM33, EXG2, GAS1, HLR1, KRE9, LRG1, PHO85, PIR1, PIR3, PST1, QDR3, SED1, SPS1,SPS2, STE7, SWM1, TIP1, UTH1, VMA9, YLR194C, YPS1, YPS3, YPS7
		transmembrane transport	22 out of 401 genes, 5.5%	226 of 6335 genes, 3.6%	0.05	ADY2, AGP3, ATP3, CAN1, CTR2, FCY21, FLR1, FRE7, FUR4, GIT1, HSP78, HXT10, PHO89, QDR3, SIT1, SUL1, VBA2, VMA9,YDR338C, YFL054C, ZRT1, ZRT2
	Yeast GO-Slim Component
		membrane	118 out of 401 genes, 29.4%	1569 of 6335 genes, 24.8%	0.05	ADK2, ADY2, ADY3, AGP3, ALO1, ASG7, ATP3, AVT2, BOS1, CAN1, CCS1, CDC10, CTR2, CWP1, DFG10, ECM33, EMP46, ERV14,FAT1, FCY21, FIG1, FKS1, FLR1, FMO1, FPR2, FRE7, FUR4, GAB1, GAL2, GAP1, GAS1, GDT1, GET1, GIT1, GRH1, GRX6, HMG2,HXT10, HXT4, HXT5, IMP2, KAP104, MMT1, MRH1, MRPL32, MSN5, NBP1, NCA2, NCE102, NCP1, NPR2, NTF2, OPT1, PDR11, PDR5,PEX11, PFF1, PGA3, PHM7, PHO89, PKR1, PLB1, PMT4, PRE1, PR…
		plasma membrane	44 out of 401 genes, 11%	377 of 6335 genes, 6%	0.001	ADY2, AGP3, ASG7, CAN1, ECM33, FAT1, FCY21, FKS1, FLR1, FRE7, FUR4, GAL2, GAP1, GAS1, GIT1, HXT10, HXT4, HXT5, MRH1,NCE102, OPT1, PDR5, PGA3, PHO89, PLB1, PST1, QDR3, SMF1, SPS2, SST2, STP22, SUL1, SYG1, TCB1, TPO3, YCP4, YDL012C,YJL171C, YJU3, YLR194C, YOL019W, YPS3, ZRT1, ZRT2
		cell wall	26 out of 401 genes, 6.5%	96 of 6335 genes, 1.5%	0.001	AGA1, CCW14, CWP1, CWP2, DAN1, ECM33, EXG2, FIG1, FIT2, FIT3, GAS1, PIR1, PIR3, PST1, RAX2, SED1, SPS2, TIP1, TIR1, TIR2,TIR3, TIR4, YJL171C, YLR194C, YPS1, ZPS1
Deleted
	Yeast GO-Slim Function
		transmembrane transporter activity	11 out of 60 genes, 18.3%	313 of 6335 genes, 4.9%	0.001	AGP3, ARR3, MAL11, MEP2, NFT1, PDR18, SGE1, YFL054C, YKR104W, YOL162W, YOL163W
	Yeast GO-Slim Process
		response to chemical	9 out of 60 genes, 15%	391 of 6335 genes, 6.2%	0.005	ARR1, ARR2, BDS1, DAK2, FIG2, PDR18, SGE1, THI72, ULI1
		transmembrane transport	5 out of 60 genes, 8.3%	226 of 6335 genes, 3.6%	0.05	AGP3, FRE7, YFL054C, YOL162W, YOL163W
	Yeast GO-Slim Component
		cell wall	5 out of 60 genes, 8.3%	96 of 6335 genes, 1.5%	0.001	FIG2, FIT2, FIT3, PIR3, TIR1
		external encapsulating structure	5 out of 60 genes, 8.3%	96 of 6335 genes, 1.5%	0.001	FIG2, FIT2, FIT3, PIR3, TIR1
FS/Stop
	Yeast GO-Slim Function
		transmembrane transporter activity	40 out of 575 genes, 7%	313 of 6335 genes, 4.9%	0.025	AQY2, BIO5, BOR1, CCC2, COT1, CTR2, DAL4, DAL5, DUR3, ERC1, ERS1, FMP37, MMP1, NHA1, NHX1, PDR11, PDR12,PHO89, POR2, PXA1, QDR1, SAL1, SSU1, STE6, SUL1, TAT1, TAT2, TIM23, TPO4, TRK1, VBA2, VMR1, YCT1, YDL199C,YDR338C, YDR387C, YMR279C, YOL075C, YPR011C, ZRT2
		nucleic acid binding transcription factor activity	27 out of 575 genes, 4.7%	159 of 6335 genes, 2.5%	0.001	AFT1, CAD1, CUP9, FKH1, GAL4, GAT2, GAT3, GSM1, GZF3, HMS1, MGA1, MIG3, OAF3, PDR3, PDR8, PHD1, RDR1, RME1,ROX1, RSF2, SIP4, STE12, TEC1, TFC1, UGA3, XBP1, YRM1
	Yeast GO-Slim Process
		response to chemical	50 out of 575 genes, 8.7%	391 of 6335 genes, 6.2%	0.02	AZR1, CAD1, CDC39, CIN5, ECM5, FKH1, FRA2, GAL3, GAL4, GCY1, GRE3, GZF3, HPA3, IRA2, LAP3, LOT6, MET4, MF(ALPHA)2,MIG3, MLF3, MXR2, OAF3, PDR3, PPQ1, PRM1, PTC2, PTP3, QDR1, RDR1, RGT2, RRI2, SIP4, SKY1, SLI1, SPH1, STE12, STE2,TSA2, UBR1, UFO1, UGA3, ULI1, VMR1, XBP1, YDL124W, YHI9, YHK8, YJL144W, YJR096W, YNR064C
		ion transport	30 out of 575 genes, 5.2%	230 of 6335 genes, 3.6%	0.05	AFT1, BOR1, CCC2, COT1, COX19, CTR2, DAL5, DNF2, DUR3, ERS1, FMP37, FRE6, FRE7, MMP1, NHX1, PHO89, POR2, PXA1,SAL1, SSU1, SUL1, TAT1, TAT2, TPO4, VBA2, YCT1, YHL008C, YMR279C, YPR011C, ZRT2
	Yeast GO-Slim Component
		plasma membrane	49 out of 575 genes, 8.5%	377 of 6335 genes, 6%	0.02	AFI1, AQY2, AZR1, BIO5, BOR1, DAL5, DFG16, DNF2, DUR3, FRE4, FRE7, GAS3, GIS4, GND2, GYL1, LSB6, MET17, MMP1, NHA1,PDR12, PHO89, PST1, PTR2, PUG1, PUN1, QDR1, RAS1, RGT2, RTA1, SIP2, SLI1, SNG1, SPS2, SRO77, SSU1, STE2, STE6, SUL1,SUR7, TAT1, TAT2, TPO4, TRK1, YDL124W, YLR194C, YNL194C, YOL019W, YPS3, ZRT2
Underrepresented
Introgressed
	Yeast GO-Slim Function
		RNA binding	8 out of 401 genes, 2%	765 of 6335 genes, 12.1%	0.001	CRG1, DCP1, HRP1, HSP26, MRPS28, POT1, THO1, TIF4632
	Yeast GO-Slim Process
		rRNA processing	9 out of 401 genes, 2.2%	303 of 6335 genes, 4.8%	0.02	FAP7, FCF1, NOC4, NOP1, RPS11B, RPS9B, RRP15, UTP5, ZUO1
		protein targeting	7 out of 401 genes, 1.7%	274 of 6335 genes, 4.3%	0.02	HSP78, IMP2, KAP104, NTF2, SRN2, STP22, VPS68
	Yeast GO-Slim Component
		nucleolus	10 out of 401 genes, 2.5%	329 of 6335 genes, 5.2%	0.02	CHD1, CKB1, FCF1, NOC4, NOP1, RPA190, RPR2, RRP15, UTP5, ZUO1
Deleted
	Yeast GO-Slim Function
	Yeast GO-Slim Process
	Yeast GO-Slim Component
		cytoplasm	16 out of 60 genes, 26.7%	3973 of 6335 genes, 62.7%	0.001	ARR1, ASP3-1, BBC1, EMP46, FRE5, IRC4, NFT1, PDR18, PHR1, REE1, RPL2B, UBI4, YAR028W, YER134C,YJL213W, YOR385W
		nucleus	7 out of 60 genes, 11.7%	2158 of 6335 genes, 34.1%	0.001	ARR1, ASP3-1, IRC4, NTC20, PHR1, TOS8, YER134C
FS/Stop
	Yeast GO-Slim Function
		RNA binding	13 out of 575 genes, 2.3%	765 of 6335 genes, 12.1%	0.001	DCP2, GCY1, GRE3, LAP3, MPP6, NOP13, PAD1, PRT1, RNP1, SPP382, TIF5, TIS11, TPA1
		ATPase activity	12 out of 575 genes, 2.1%	256 of 6335 genes, 4.0%	0.02	CCC2, DNF2, HSP78, MLH3, PDR11, PRP43, PXA1, RDH54, SPP382, STE6, VMR1, YOL075C
	Yeast GO-Slim Process
		mitochondrion organization	20 out of 575 genes, 3.5%	343 of 6335 genes, 5.4%	0.05	AIM37, ATP23, CBP4, COA4, COX19, ECM10, EMI1, HOT13, HSP78, MDM1, MGR2, MOS2, MRPL50, MTG1, PAM16, REX2, RSF1,TIM23, TIM9, YJR120W
		lipid metabolic process	14 out of 575 genes, 2.4%	270 of 6335 genes, 4.3%	0.05	CDS1, CSH1, GAA1, GRE2, HMG2, ICT1, IPT1, LAP2, LSB6, NMA111, NSG1, TCB2, VPS30, YDR018C
		DNA repair	12 out of 575 genes, 2.1%	236 of 6335 genes, 3.7%	0.05	APN1, CTR9, DPB3, DPB4, MLH3, MMS1, MSH3, RAD28, RAD59, RDH54, SIN3, YEN1
		chromatin organization	11 out of 575 genes, 1.9%	236 of 6335 genes, 3.7%	0.025	APC9, CTR9, DPB3, DPB4, FKH1, HDA3, HST1, SIF2, SIN3, SPT7, YNG1
	Yeast GO-Slim Component
		cytoplasm	293 out of 575 genes, 51%	3973 of 6335 genes, 62.7%	0.001	ACM1, ADK2, ADO1, AFI1, AFT1, AIM20, AIM26, AIM37, AIM45, ALF1, ALT2, ALY2, APN1, APT2, AQY2, ARI1, ARK1, ARO8, AST2,ATG16, ATG21, ATG29, ATG34, ATP23, BIO4, BLS1, BOR1, BUD4, CAD1, CBP4, CCC2, CDC16, CDC37, CDC39, CDS1, CIN5, CLN1,COA4, COQ4, COT1, COX15, COX19, CRF1, CSH1, CTL1, CTR2, CTS1, CYC3, DBP1, DCP2, DIA1, DMA2, DSE3, ECM10, ECM14,ECM16, ECM18, ECM4, ECM5, EFM1, EMC6, EPS1, ERS1, ESBP6,…
		nucleus	150 out of 575 genes, 26.1%	2158 of 6335 genes, 34.1%	0.001	ACM1, ADO1, AFI1, AFT1, AIM20, ALF1, ALT2, APC2, APC9, APN1, ARI1, ASF2, ASI2, ATG16, ATG29, BMT5, CAD1, CBF2, CDC16,CDC39, CIN5, CLN1, COA4, CRF1, CTL1, CTR9, CTS1, CUP9, DCP2, DPB3, DPB4, DSE3, DSN1, ECM1, ECM16, ECM5, ESL2, EST2,ETT1, FKH1, FPR3, FRA2, GAL3, GAL4, GAT2, GAT3, GCY1, GRE2, GRE3, GSM1, GZF3, HDA3, HMG2, HMS2, HPA3, HST1, HST2,HTZ1, IDS2, IGO1, LAP2, LOT6, LSB1, LTO1, LTP1, MAD1, …
		mitochondrion	77 out of 575 genes, 13.4%	1147 of 6335 genes, 18.1%	0.005	ADK2, AIM26, AIM37, AIM45, APN1, ATP23, CBP4, COA4, COQ4, COT1, COX15, COX19, CYC3, ECM10, ECM16, ECM18, ESBP6,FMP37, FMP48, GYL1, HFD1, HOT13, HSP78, IRA2, KGD1, LAP3, LIP5, MET7, MGR2, MLP2, MMT2, MOS2, MPA43, MRM1, MRPL50,MSM1, MTG1, MXR2, NTA1, OAF3, PAD1, PAM16, POR2, PRP43, PUS5, PUT1, REX2, RMA1, RSF1, SAL1, SAP4, SHH4, SPP382,SPT7, SSQ1, SUR7, TFA1, TIM23, TIM9, UBP16, VMR1, YEL067C, YER0…
		endomembrane system	44 out of 575 genes, 7.7%	767 of 6335 genes, 12.1%	0.002	ALY2, AQY2, ASI2, ATG21, BLS1, CCC2, CDS1, CTS1, EMC6, EPS1, ERS1, ESBP6, GAA1, GEA1, GYL1, HFD1, HMG2, IRA2, JEM1,KTR2, LAA1, MAD1, MLP2, MNL2, MNN1, MNN5, MNT2, NHX1, NSG1, NVJ2, RIC1, SLI1, SLY41, SPC3, SRN2, STE6, TCB2, UBP1,VPS8, YBR096W, YCT1, YDL121C, YNL194C, YPR114W
		endoplasmic reticulum	22 out of 575 genes, 3.8%	406 of 6335 genes, 6.4%	0.02	AQY2, CDS1, CTS1, EMC6, EPS1, ESBP6, GAA1, HMG2, IRA2, JEM1, MNL2, NSG1, NVJ2, SLY41, SPC3, TCB2, UBP1, YBR096W,YCT1, YDL121C, YNL194C, YPR114W
		ribosome	13 out of 575 genes, 2.3%	349 of 6335 genes, 5.5%	0.001	ESL2, LAA1, MPP6, MRPL50, NMD3, NVJ2, SLH1, TIF5, VMR1, YIH1, YJL028W, YJL213W, YPR096C
		nucleolus	9 out of 575 genes, 1.6%	329 of 6335 genes, 5.2%	0.001	BMT5, ECM1, ECM16, EST2, FPR3, NOP13, POL5, POP3, TRI1
