# Supplementary material for: The 100-genomes strains, an S. cerevisiae resource that illuminates its natural phenotypic and genotypic variation and emergence as an opportunistic pathogen
Source: HighWire-hosted journal article supplement (doi:10.1101/gr.185538.114), 2015-04-03
Supplement: Table_S7.xlsx [file Table_S7.xlsx]

## Sheet: Sheet1
Results of tests for non-independence between genetic variants (introgressed loci, frameshift/stop polymorphisms, novel genes, deleted genes) and population membership or clinical status.
Population-associated variation
tested for association between structure population membership and introgressed loci, frameshift/stop, novel/deleted genes (not SNPs)
Fisher's exact test, Bonferroni correction
introgression			frameshift/stop in gene			deleted genes			novel genes
gene	corrected p-value		gene	corrected p-value		gene	corrected p-value		gene	corrected p-value
YLR406C-A	7.75918e-08		YGR121W-A	4.17772e-09		YFR057W	0.000400907		yjm1199_Chr06_138171_138899_1	1.06076e-14
EHD3	2.86882e-07		VBA4	9.12054e-09		YJL218W	0.00173471		yjm326_Chr07_949800_953170_1	3.29297e-07
KRS1	5.09744e-07		BLS1	2.94358e-08		YAR028W	0.00305671		yjm1463_Chr04_1189784_1190637_1	1.00031e-06
ENA5	5.10162e-07		YAP7	3.53041e-08					yjm1133_Chr10_28442_38308_1	1.09813e-06
PGA3	1.09639e-06		MET7	2.86882e-07					yjm1133_Chr10_28442_38308_3	1.09813e-06
ZRT1	3.53495e-05		ULI1	2.95082e-07					yjm1133_Chr10_28442_38308_4	1.09813e-06
YOL014W	0.000139029		YOL097W-A	2.95082e-07					yjm1208_Chr07_961157_962254_1	4.59484e-06
YOL038C-A	0.0164628		YGL193C	2.95239e-07					yjm1083_Chr06_253876_262199_1	1.57598e-05
			YPL038W-A	3.33979e-07					yjm1199_Chr11_578029_579110_1	0.000169929
			YGR035W-A	8.87886e-07					yjm1307_Chr06_236094_239973_1	0.000170756
			YFR045W	1.65693e-06					yjm1133_Chr10_28442_38308_2	0.000202123
			MPA43	2.03812e-06					yjm1208_Chr11_324086_324768_1	0.000423817
			YHR007C-A	2.37741e-06					yjm1083_Chr05_21587_33397_1	0.00218547
			YLR036C	2.47471e-06					yjm1385_Chr01_176456_179818_2	0.0028904
			YKL070W	3.77187e-06					yjm1385_Chr07_395765_396216_1	0.0028904
			YMR030W-A	4.49617e-06					yjm1385_Chr16_43877_44817_1	0.0028904
			YNL067W-B	5.23697e-06					yjm1342_Chr11_386030_387061_1	0.00835324
			YNL277W-A	8.82943e-06					TAT3	0.0326332
			CBF2	1.45869e-05
			YER186C	1.57598e-05
			AQY2	1.8577e-05
			BIO5	0.000111712
			BSC4	0.000404288
			AIM45	0.000434446
			YBL008W-A	0.000835007
			CCC2	0.000835007
			RGA2	0.000835007
			JLP1	0.000835007
			YLR345W	0.000835007
			TIF5	0.000835007
			SHH4	0.000944184
			TRI1	0.000951425
			YPL119C-A	0.00107644
			YLR342W-A	0.00127866
			YOR316C-A	0.00141993
			YDL118W	0.00173212
			ECM12	0.0030911
			YLR415C	0.00500395
			YPR096C	0.00691578
			YLR264C-A	0.00709822
			COT1	0.00999467
			YMR084W	0.0107425
			TAD1	0.0116489
			FYV12	0.0139835
			DAL4	0.0159602
			YNL097C-B	0.0183016
			RFX1	0.0266193
			MIG3	0.0329352
			NVJ2	0.0329352
Clinical/non-clinical associations
tested for association with introgressed loci, frameshift/stop, novel/deleted genes (not SNPs)
Fisher's exact test, Bonferroni correction, no population structure correction
variant type	systematic	standard	corrected p-value
frameshift/stop	YNL087W	TCB2	0.00618654
frameshift/stop	YNR056C	BIO5	0.00903352
introgression	YOR153W	PDR5	0.0119944
