# Supplementary material for: The 100-genomes strains, an S. cerevisiae resource that illuminates its natural phenotypic and genotypic variation and emergence as an opportunistic pathogen
Source: HighWire-hosted journal article supplement (doi:10.1101/gr.185538.114), 2015-04-03
Supplement: Table_S8.xlsx [file Table_S8.xlsx]

## Sheet: Sheet1
	Strain	No. of SNP	SNP %	SNP in CDS	SNP in CDS %	nonsyn SNP	nonsyn SNP %	No. of Deletions	Del in CDS	No. of Insertions	Ins in CDS	~genone size
1	yjm1078	129582	0.996	64918	0.499	25670	0.197	6841	1311	4528	677	12M
2	yjm1083	73616	0.566	38170	0.293	15231	0.117	4242	642	3477	673	13M
3	yjm1129	64089	0.492	33748	0.259	14466	0.111	4254	999	2703	501	13M
4	yjm1133	72934	0.561	38337	0.294	14506	0.111	3993	552	3265	592	13M
5	yjm1190	71643	0.551	37207	0.286	13710	0.105	4005	763	2894	561	13M
6	yjm1199	82559	0.635	42617	0.327	17114	0.131	4880	877	3480	682	12M		Genome sizes	12M - 14M
7	yjm1202	80729	0.62	42629	0.327	17464	0.134	4999	998	3335	665	13M
8	yjm1208	74624	0.574	37993	0.292	14676	0.112	4315	657	3373	479	13M		avg SNPs	78184.1
9	yjm1242	66140	0.508	35229	0.27	16140	0.124	4254	982	2752	549	12M		avg Dels	4479.19
10	yjm1244	58814	0.452	31429	0.241	12956	0.099	3632	675	2469	527	13M		avg Ins	3361.55
11	yjm1248	98752	0.759	52199	0.401	19507	0.15	5502	789	3595	511	13M
12	yjm1250	70961	0.545	34952	0.268	13831	0.106	4041	582	3387	511	12M		min SNPs	55861
13	yjm1252	138123	1.062	67513	0.519	25004	0.192	6789	906	5186	636	13M		min Dels	3542
14	yjm1273	86866	0.668	46546	0.358	16403	0.126	4486	588	3642	591	13M		min Ins	2457
15	yjm1304	81127	0.624	41943	0.322	17174	0.132	4771	1059	3617	663	13M
16	yjm1307	83729	0.644	42764	0.328	17076	0.131	4362	708	3891	670	13M		max SNPs	144215
17	yjm1311	78923	0.607	39713	0.305	16737	0.128	4525	880	3904	669	13M		max Dels	7594
18	yjm1326	70811	0.544	37562	0.288	14307	0.11	3991	586	3060	537	13M		max Ins	5447
19	yjm1332	62388	0.479	32908	0.253	13854	0.106	4154	786	2845	568	12M
20	yjm1336	67177	0.516	32112	0.247	13390	0.103	4421	771	3062	426	13M
21	yjm1338	78754	0.605	43490	0.334	17072	0.131	4609	947	3296	617	12M
22	yjm1341	68650	0.528	33668	0.258	14108	0.108	4102	717	3372	572	13M
23	yjm1342	101110	0.777	53147	0.408	19785	0.152	5368	690	3990	555	13M
24	yjm1355	84743	0.651	42019	0.323	18024	0.138	5433	937	3728	663	13M
25	yjm1356	64820	0.498	33749	0.259	14400	0.11	4256	817	2952	540	13M
26	yjm1381	67672	0.52	38565	0.296	15678	0.12	3552	580	3159	653	13M
27	yjm1383	69740	0.536	36547	0.281	14941	0.114	4174	651	3326	622	13M
28	yjm1385	68113	0.523	37889	0.291	15059	0.115	3601	599	3057	560	13M
29	yjm1386	73163	0.562	38417	0.295	14725	0.113	4221	573	3226	575	13M
30	yjm1387	70119	0.539	36441	0.28	15419	0.118	4445	823	3267	640	13M
31	yjm1388	83281	0.64	44621	0.343	16936	0.13	4208	644	3498	434	13M
32	yjm1389	85140	0.654	44115	0.339	16776	0.129	4347	630	3695	493	12M
33	yjm1399	106842	0.821	54343	0.418	21430	0.164	6028	788	3919	673	13M
34	yjm1400	97945	0.753	49928	0.384	18947	0.145	5619	787	4228	703	13M
35	yjm1401	91455	0.703	47406	0.364	17947	0.138	5223	842	3814	591	12M
36	yjm1402	88812	0.683	47361	0.364	16667	0.128	4630	549	3812	603	13M
37	yjm1415	59791	.459	31653	.243	12908	.099	3973	691	2557	455	13M
38	yjm1417	67718	.520	32762	.252	13937	.107	4479	784	3147	458	13M
39	yjm1418	97998	.753	53871	.414	18466	.142	5323	688	3857	591	13M
40	yjm1419	78866	.606	41590	.319	15190	.116	4142	565	3604	492	14M
41	yjm1433	73375	.564	37774	.290	14714	.113	4166	729	3369	556	13M
42	yjm1434	84635	.651	46061	.354	16097	.123	4319	545	3509	600	13M
43	yjm1439	102398	.787	53951	.415	20627	.158	5798	846	3774	576	13M
44	yjm1443	89838	.691	48796	.375	18415	.141	4661	880	3835	786	12M
45	yjm1444	96287	.740	47732	.367	18368	.141	5199	769	4270	729	13M
46	yjm1447	103011	.792	54448	.418	20187	.155	5223	721	3873	600	12M
47	yjm1450	70930	.545	35842	.275	14406	.110	4364	793	3326	480	13M
48	yjm1460	79900	.614	43656	.335	16206	.124	3762	503	3471	536	13M
49	yjm1463	78693	.605	42073	.323	17771	.136	3987	746	4217	700	14M
50	yjm1477	69484	.534	36043	.277	16756	.128	4486	1056	2948	584	12M
51	yjm1478	72251	.555	39468	.303	16911	.130	4967	1177	2907	500	13M
52	yjm1479	94421	.726	49004	.376	18113	.139	5407	659	3982	641	13M
53	yjm1526	62968	.484	31983	.246	13474	.103	4150	844	2710	469	13M
54	yjm1527	79437	.611	42358	.325	16459	.126	4729	928	3298	586	13M
55	yjm1549	70150	.539	37969	.292	15164	.116	3735	712	3305	593	13M
56	yjm1573	86248	.663	47446	.364	16979	.130	4367	682	3780	625	12M
57	yjm1574	69279	.532	36726	.282	16359	.125	4347	878	3149	589	13M
58	yjm1592	85264	.655	44842	.344	17224	.132	4472	675	3550	507	12M
59	yjm1615	69227	.532	37865	.291	14536	.111	3598	495	2994	495	13M
60	yjm189	60878	.468	32740	.251	13699	.105	4135	886	2602	429	12M
61	yjm193	72772	.559	38608	.296	16686	.128	4166	874	3118	575	13M
62	yjm195	100549	.773	53729	.413	20374	.156	5289	684	3647	517	13M
63	yjm244	61431	.472	32029	.246	13634	.104	4129	904	2865	545	13M
64	yjm248	144215	1.109	68611	.527	27935	.214	7594	1427	5447	789	12M
65	yjm270	66704	.513	35233	.271	15382	.118	4596	851	2895	495	13M
66	yjm271	68015	.523	35325	.271	14704	.113	3715	621	3347	601	14M
67	yjm320	78960	.607	40036	.307	15118	.116	4671	666	3432	484	14M
68	yjm326	66944	.514	36907	.283	14016	.107	3753	633	2901	449	13M
69	yjm428	68780	.529	35431	.272	13679	.105	3948	618	3129	508	12M
70	yjm450	76057	.585	38404	.295	14266	.109	4170	545	3451	494	13M
71	yjm451	76526	.588	40068	.308	15307	.117	3855	547	3400	531	12M
72	yjm453	55861	.429	30459	.234	12041	.092	3542	682	2457	418	13M
73	yjm456	75080	.577	40060	.308	14745	.113	4083	580	3159	517	12M
74	yjm470	82423	.634	41884	.322	16267	.125	4968	748	3673	486	13M
75	yjm541	80646	.620	42649	.328	17222	.132	4726	863	3363	686	13M
76	yjm554	77088	.592	39354	.302	14615	.112	4172	619	3427	465	13M
77	yjm555	77275	.594	39754	.305	14786	.113	4031	479	3320	545	13M
78	yjm627	86799	.667	46162	.355	18342	.141	4844	751	3209	591	13M
79	yjm681	80624	.620	39874	.306	16314	.125	4734	930	3308	704	12M
80	yjm682	75652	.581	39371	.302	15495	.119	4254	698	3403	543	12M
81	yjm683	73876	.568	39034	.300	15438	.118	4043	614	3496	645	13M
82	yjm689	82759	.636	40158	.308	16024	.123	4805	865	3328	600	12M
83	yjm693	72292	.556	37565	.288	14912	.114	4049	721	3163	562	13M
84	yjm969	71488	.549	34131	.262	15039	.115	4448	1091	3090	749	12M
85	yjm972	60937	.468	33818	.260	14443	.111	3714	804	2712	555	13M
86	yjm975	67369	.518	33293	.256	14031	.107	4055	974	2806	679	12M
87	yjm978	61168	.470	32181	.247	13077	.100	3703	628	2692	435	13M
88	yjm981	64698	.497	30897	.237	12243	.094	3897	650	2870	443	13M
89	yjm984	68173	.524	33531	.257	14321	.110	4020	816	3207	679	13M
90	yjm987	67536	.519	33454	.257	14524	.111	4206	834	3140	520	13M
91	yjm990	62343	.479	32489	.249	13454	.103	4029	716	2725	467	13M
92	yjm993	63947	.491	33051	.254	13691	.105	4160	708	2766	495	13M
93	yjm996	65144	.501	33045	.254	13879	.106	4134	691	2840	482	13M
