# Supplementary material for: The 100-genomes strains, an S. cerevisiae resource that illuminates its natural phenotypic and genotypic variation and emergence as an opportunistic pathogen
Source: HighWire-hosted journal article supplement (doi:10.1101/gr.185538.114), 2015-04-03
Supplement: Table_S9.docx [file Table_S9.docx]

**Table S9**. Copy numbers, based on coverage, of Ty1-Ty5 in the 93 strains and S288c.

| **Strain** | **Ty1** | **Ty2** | **Ty3** | **Ty4** | **Ty5** | **total** |
| --- | --- | --- | --- | --- | --- | --- |
| S288c | 31 | 13 | 2 | 3 | 1 | 50 |
| YJM1078 | 1 | 33 | 0 | 0 | 2 | 36 |
| YJM1083 | 20 | 7 | 4 | 0 | 2 | 33 |
| YJM1129 | 10 | 15 | 0 | 0 | 2 | 27 |
| YJM1133 | 12 | 12 | 5 | 1 | 1 | 32 |
| YJM1190 | 24 | 6 | 2 | 0 | 1 | 33 |
| YJM1199 | 21 | 7 | 5 | 1 | 2 | 37 |
| YJM1202 | 26 | 9 | 1 | 2 | 3 | 41 |
| YJM1208 | 25 | 7 | 1 | 3 | 3 | 39 |
| YJM1242 | 0 | 11 | 0 | 0 | 3 | 14 |
| YJM1244 | 0 | 14 | 0 | 0 | 2 | 17 |
| YJM1248 | 26 | 2 | 1 | 0 | 0 | 28 |
| YJM1250 | 26 | 14 | 1 | 0 | 3 | 44 |
| YJM1252 | 0 | 29 | 0 | 0 | 2 | 32 |
| YJM1273 | 2 | 8 | 8 | 4 | 0 | 22 |
| YJM1304 | 20 | 11 | 8 | 4 | 3 | 46 |
| YJM1307 | 12 | 15 | 3 | 1 | 1 | 32 |
| YJM1311 | 24 | 11 | 4 | 0 | 2 | 42 |
| YJM1326 | 20 | 11 | 1 | 1 | 2 | 36 |
| YJM1332 | 5 | 10 | 1 | 0 | 2 | 18 |
| YJM1336 | 1 | 11 | 0 | 0 | 2 | 14 |
| YJM1338 | 3 | 11 | 4 | 1 | 3 | 23 |
| YJM1341 | 1 | 14 | 0 | 0 | 2 | 17 |
| YJM1342 | 15 | 16 | 0 | 6 | 3 | 40 |
| YJM1355 | 32 | 17 | 1 | 1 | 4 | 55 |
| YJM1356 | 1 | 13 | 0 | 0 | 2 | 16 |
| YJM1381 | 18 | 9 | 2 | 1 | 2 | 32 |
| YJM1383 | 11 | 13 | 4 | 0 | 1 | 29 |
| YJM1385 | 34 | 14 | 4 | 7 | 3 | 62 |
| YJM1386 | 17 | 8 | 0 | 3 | 2 | 30 |
| YJM1387 | 0 | 10 | 0 | 0 | 2 | 12 |
| YJM1388 | 5 | 2 | 1 | 4 | 0 | 12 |
| YJM1389 | 13 | 11 | 3 | 3 | 3 | 33 |
| YJM1399 | 0 | 1 | 1 | 0 | 0 | 2 |
| YJM1400 | 6 | 23 | 6 | 4 | 3 | 43 |
| YJM1401 | 9 | 12 | 8 | 5 | 2 | 36 |
| YJM1402 | 5 | 14 | 1 | 1 | 2 | 22 |
| YJM1415 | 0 | 5 | 0 | 0 | 2 | 8 |
| YJM1417 | 0 | 6 | 0 | 0 | 2 | 8 |
| YJM1418 | 2 | 1 | 5 | 1 | 1 | 10 |
| YJM1419 | 21 | 25 | 5 | 6 | 2 | 60 |
| YJM1433 | 7 | 16 | 1 | 6 | 2 | 32 |
| YJM1434 | 2 | 9 | 7 | 2 | 0 | 20 |
| YJM1439 | 21 | 1 | 2 | 0 | 0 | 24 |
| YJM1443 | 7 | 11 | 8 | 4 | 0 | 31 |
| YJM1444 | 19 | 8 | 6 | 0 | 2 | 36 |
| YJM1447 | 1 | 2 | 0 | 0 | 0 | 3 |
| YJM1450 | 20 | 13 | 6 | 0 | 1 | 40 |
| YJM1460 | 20 | 3 | 2 | 6 | 3 | 34 |
| YJM1463 | 11 | 21 | 0 | 0 | 1 | 33 |
| YJM1477 | 0 | 12 | 0 | 0 | 2 | 15 |
| YJM1478 | 9 | 19 | 3 | 0 | 0 | 31 |
| YJM1479 | 6 | 22 | 7 | 4 | 3 | 41 |
| YJM1526 | 5 | 17 | 1 | 0 | 3 | 25 |
| YJM1527 | 1 | 15 | 2 | 2 | 2 | 22 |
| YJM1549 | 17 | 18 | 6 | 2 | 5 | 48 |
| YJM1573 | 5 | 17 | 2 | 3 | 3 | 30 |
| YJM1574 | 7 | 14 | 0 | 0 | 3 | 24 |
| YJM1592 | 13 | 11 | 3 | 3 | 4 | 33 |
| YJM1615 | 16 | 6 | 4 | 3 | 2 | 31 |
| YJM189 | 1 | 5 | 0 | 0 | 2 | 9 |
| YJM193 | 8 | 11 | 4 | 2 | 1 | 27 |
| YJM195 | 19 | 5 | 2 | 0 | 0 | 26 |
| YJM244 | 1 | 11 | 0 | 0 | 1 | 13 |
| YJM248 | 0 | 29 | 0 | 0 | 2 | 32 |
| YJM270 | 0 | 27 | 0 | 0 | 3 | 31 |
| YJM271 | 10 | 15 | 1 | 1 | 1 | 27 |
| YJM320 | 19 | 9 | 5 | 1 | 2 | 37 |
| YJM326 | 23 | 9 | 7 | 4 | 1 | 43 |
| YJM428 | 23 | 18 | 4 | 5 | 3 | 52 |
| YJM450 | 31 | 10 | 4 | 2 | 1 | 49 |
| YJM451 | 21 | 10 | 1 | 4 | 3 | 38 |
| YJM453 | 1 | 10 | 0 | 0 | 1 | 13 |
| YJM456 | 7 | 9 | 6 | 6 | 2 | 30 |
| YJM470 | 21 | 12 | 4 | 7 | 3 | 47 |
| YJM541 | 24 | 8 | 6 | 0 | 3 | 40 |
| YJM554 | 20 | 9 | 4 | 1 | 3 | 37 |
| YJM555 | 17 | 13 | 6 | 1 | 2 | 39 |
| YJM627 | 11 | 4 | 1 | 0 | 1 | 17 |
| YJM681 | 15 | 15 | 9 | 1 | 3 | 43 |
| YJM682 | 23 | 12 | 6 | 1 | 2 | 44 |
| YJM683 | 18 | 13 | 6 | 4 | 1 | 43 |
| YJM689 | 14 | 8 | 3 | 1 | 1 | 27 |
| YJM693 | 21 | 15 | 1 | 3 | 1 | 42 |
| YJM969 | 1 | 10 | 0 | 0 | 1 | 12 |
| YJM972 | 0 | 7 | 0 | 0 | 2 | 9 |
| YJM975 | 0 | 7 | 0 | 0 | 2 | 9 |
| YJM978 | 0 | 5 | 0 | 0 | 2 | 7 |
| YJM981 | 0 | 10 | 0 | 0 | 2 | 12 |
| YJM984 | 0 | 7 | 0 | 0 | 2 | 9 |
| YJM987 | 0 | 6 | 0 | 0 | 2 | 9 |
| YJM990 | 0 | 8 | 0 | 0 | 2 | 11 |
| YJM993 | 0 | 6 | 0 | 0 | 2 | 8 |
| YJM996 | 0 | 12 | 0 | 0 | 2 | 14 |
| **avg** |  |  |  |  |  | 28 |
| **max** |  |  |  |  |  | 62 |
| **median** |  |  |  |  |  | 30 |
| **min** |  |  |  |  |  | 2 |
