# Supplementary material for: The 100-genomes strains, an S. cerevisiae resource that illuminates its natural phenotypic and genotypic variation and emergence as an opportunistic pathogen
Source: HighWire-hosted journal article supplement (doi:10.1101/gr.185538.114), 2015-04-03
Supplement: Table_S10.xlsx [file Table_S10.xlsx]

## Sheet: (A) In S288c
Locations of LTRs in the 93 strains. (A) LTRs that are present in S288c and one or more of the 93 strains. (B) LTRs that are not present in S288c but present in one or more of the 93 strains. (C) Total numbers of positions of 4 types of LTRs that are present in the 93 strains and S288c.
	LTR_TY1_2 present in S288c	Chromosome	S288c coordinates start	S288c coordinates end		Strains,
LTR_TY1_2_ present in S288c	S288c	Chr01	160523	160238	2	S288c,yjm1433,
LTR_TY1_2_ present in S288c	S288c	Chr01	166111	165826	1	S288c,
LTR_TY1_2_ present in S288c	S288c	Chr01	183193	183462	68	S288c,yjm1078,yjm1083,yjm1129,yjm1190,yjm1208,yjm1242,yjm1244,yjm1250,yjm1252,yjm1273,yjm1304,yjm1307,yjm1332,yjm1336,yjm1338,yjm1341,yjm1342,yjm1381,yjm1385,yjm1387,yjm1388,yjm1389,yjm1400,yjm1402,yjm1415,yjm1418,yjm1419,yjm1433,yjm1434,yjm1443,yjm1450,yjm1463,yjm1477,yjm1478,yjm1479,yjm1526,yjm1527,yjm1549,yjm1573,yjm1574,yjm1592,yjm1615,yjm189,yjm195,yjm244,yjm248,yjm270,yjm450,yjm451,yjm453,y…
LTR_TY1_2_ present in S288c	S288c	Chr01	189477	189745	73	S288c,yjm1078,yjm1083,yjm1129,yjm1190,yjm1208,yjm1242,yjm1244,yjm1248,yjm1250,yjm1252,yjm1273,yjm1304,yjm1307,yjm1332,yjm1336,yjm1338,yjm1341,yjm1342,yjm1355,yjm1356,yjm1381,yjm1385,yjm1387,yjm1388,yjm1389,yjm1399,yjm1401,yjm1402,yjm1415,yjm1417,yjm1418,yjm1433,yjm1434,yjm1439,yjm1443,yjm1450,yjm1463,yjm1477,yjm1478,yjm1526,yjm1527,yjm1549,yjm1573,yjm1574,yjm1592,yjm1615,yjm189,yjm193,yjm195,yjm2…
LTR_TY1_2_ present in S288c	S288c	Chr02	9144	9416	25	S288c,yjm1078,yjm1129,yjm1208,yjm1242,yjm1244,yjm1307,yjm1341,yjm1356,yjm1417,yjm1463,yjm1477,yjm1526,yjm1615,yjm428,yjm450,yjm555,yjm627,yjm969,yjm972,yjm975,yjm978,yjm990,yjm993,yjm996,
LTR_TY1_2_ present in S288c	S288c	Chr02	29695	29967	1	S288c,
LTR_TY1_2_ present in S288c	S288c	Chr02	35322	35594	1	S288c,
LTR_TY1_2_ present in S288c	S288c	Chr02	221088	221358	1	S288c,
LTR_TY1_2_ present in S288c	S288c	Chr02	226672	226952	2	S288c,yjm1273,
LTR_TY1_2_ present in S288c	S288c	Chr02	259629	259909	1	S288c,
LTR_TY1_2_ present in S288c	S288c	Chr02	265214	265494	1	S288c,
LTR_TY1_2_ present in S288c	S288c	Chr02	327119	327394	90	S288c,yjm1078,yjm1083,yjm1129,yjm1133,yjm1190,yjm1199,yjm1202,yjm1208,yjm1242,yjm1244,yjm1248,yjm1250,yjm1252,yjm1273,yjm1304,yjm1307,yjm1311,yjm1326,yjm1336,yjm1341,yjm1342,yjm1355,yjm1356,yjm1381,yjm1383,yjm1385,yjm1386,yjm1387,yjm1388,yjm1389,yjm1399,yjm1400,yjm1401,yjm1402,yjm1415,yjm1417,yjm1419,yjm1433,yjm1434,yjm1439,yjm1443,yjm1444,yjm1447,yjm1450,yjm1460,yjm1463,yjm1477,yjm1478,yjm1479,y…
LTR_TY1_2_ present in S288c	S288c	Chr03	82751	83036	1	S288c,
LTR_TY1_2_ present in S288c	S288c	Chr03	83196	83055	55	S288c,yjm1078,yjm1129,yjm1133,yjm1190,yjm1199,yjm1202,yjm1208,yjm1242,yjm1244,yjm1250,yjm1252,yjm1273,yjm1304,yjm1326,yjm1336,yjm1341,yjm1342,yjm1356,yjm1385,yjm1386,yjm1388,yjm1389,yjm1401,yjm1415,yjm1417,yjm1434,yjm1443,yjm1444,yjm1447,yjm1460,yjm1477,yjm1526,yjm1549,yjm1573,yjm1574,yjm1592,yjm189,yjm193,yjm244,yjm320,yjm326,yjm450,yjm453,yjm555,yjm627,yjm681,yjm693,yjm969,yjm972,yjm978,yjm984,…
LTR_TY1_2_ present in S288c	S288c	Chr03	84120	84290	2	S288c,yjm470,
LTR_TY1_2_ present in S288c	S288c	Chr03	84346	84616	4	S288c,yjm1190,yjm1273,yjm271,
LTR_TY1_2_ present in S288c	S288c	Chr03	84862	85132	1	S288c,
LTR_TY1_2_ present in S288c	S288c	Chr03	90489	90761	1	S288c,
LTR_TY1_2_ present in S288c	S288c	Chr03	124414	124134	44	S288c,yjm1078,yjm1129,yjm1190,yjm1208,yjm1242,yjm1244,yjm1250,yjm1252,yjm1311,yjm1326,yjm1332,yjm1336,yjm1338,yjm1341,yjm1355,yjm1356,yjm1383,yjm1385,yjm1387,yjm1415,yjm1417,yjm1477,yjm1526,yjm1574,yjm189,yjm244,yjm270,yjm271,yjm326,yjm453,yjm627,yjm683,yjm693,yjm969,yjm972,yjm975,yjm978,yjm981,yjm984,yjm987,yjm990,yjm993,yjm996,
LTR_TY1_2_ present in S288c	S288c	Chr03	143029	142806	80	S288c,yjm1078,yjm1083,yjm1129,yjm1133,yjm1190,yjm1199,yjm1202,yjm1208,yjm1242,yjm1244,yjm1250,yjm1252,yjm1273,yjm1304,yjm1307,yjm1311,yjm1326,yjm1332,yjm1336,yjm1338,yjm1341,yjm1356,yjm1381,yjm1383,yjm1385,yjm1387,yjm1388,yjm1389,yjm1399,yjm1400,yjm1402,yjm1415,yjm1417,yjm1419,yjm1433,yjm1434,yjm1443,yjm1444,yjm1447,yjm1460,yjm1463,yjm1477,yjm1479,yjm1526,yjm1549,yjm1573,yjm1574,yjm1592,yjm1615,y…
LTR_TY1_2_ present in S288c	S288c	Chr03	151571	151851	67	S288c,yjm1078,yjm1129,yjm1190,yjm1199,yjm1202,yjm1208,yjm1242,yjm1244,yjm1250,yjm1273,yjm1307,yjm1311,yjm1332,yjm1336,yjm1338,yjm1341,yjm1342,yjm1355,yjm1381,yjm1383,yjm1386,yjm1387,yjm1389,yjm1399,yjm1400,yjm1402,yjm1415,yjm1418,yjm1419,yjm1433,yjm1434,yjm1444,yjm1447,yjm1450,yjm1460,yjm1477,yjm1478,yjm1479,yjm1526,yjm1527,yjm1549,yjm1573,yjm1574,yjm1592,yjm189,yjm193,yjm195,yjm248,yjm270,yjm320…
LTR_TY1_2_ present in S288c	S288c	Chr03	168882	168600	1	S288c,
LTR_TY1_2_ present in S288c	S288c	Chr03	169258	169544	1	S288c,
LTR_TY1_2_ present in S288c	S288c	Chr03	295058	295320	73	S288c,yjm1078,yjm1129,yjm1133,yjm1190,yjm1199,yjm1202,yjm1208,yjm1242,yjm1244,yjm1250,yjm1252,yjm1304,yjm1307,yjm1311,yjm1326,yjm1332,yjm1336,yjm1338,yjm1341,yjm1342,yjm1355,yjm1381,yjm1383,yjm1385,yjm1387,yjm1399,yjm1400,yjm1401,yjm1402,yjm1415,yjm1417,yjm1418,yjm1433,yjm1444,yjm1450,yjm1460,yjm1477,yjm1479,yjm1526,yjm1549,yjm1573,yjm1574,yjm1615,yjm189,yjm193,yjm195,yjm244,yjm248,yjm270,yjm271,…
LTR_TY1_2_ present in S288c	S288c	Chr04	434703	434423	2	S288c,yjm1311,
LTR_TY1_2_ present in S288c	S288c	Chr04	513539	513259	50	S288c,yjm1078,yjm1083,yjm1129,yjm1199,yjm1208,yjm1242,yjm1244,yjm1250,yjm1307,yjm1332,yjm1336,yjm1341,yjm1355,yjm1356,yjm1381,yjm1385,yjm1386,yjm1387,yjm1400,yjm1415,yjm1417,yjm1477,yjm1478,yjm1479,yjm1526,yjm1549,yjm1574,yjm1615,yjm189,yjm193,yjm244,yjm270,yjm271,yjm326,yjm450,yjm451,yjm453,yjm681,yjm689,yjm693,yjm969,yjm972,yjm978,yjm981,yjm984,yjm987,yjm990,yjm993,yjm996,
LTR_TY1_2_ present in S288c	S288c	Chr04	513969	513697	1	S288c,
LTR_TY1_2_ present in S288c	S288c	Chr04	519596	519326	1	S288c,
LTR_TY1_2_ present in S288c	S288c	Chr04	520448	520175	3	S288c,yjm1383,yjm450,
LTR_TY1_2_ present in S288c	S288c	Chr04	520528	520782	3	S288c,yjm1383,yjm450,
LTR_TY1_2_ present in S288c	S288c	Chr04	645784	645502	1	S288c,
LTR_TY1_2_ present in S288c	S288c	Chr04	651368	651086	86	S288c,yjm1078,yjm1083,yjm1129,yjm1133,yjm1190,yjm1208,yjm1242,yjm1244,yjm1248,yjm1250,yjm1252,yjm1273,yjm1304,yjm1307,yjm1311,yjm1326,yjm1332,yjm1336,yjm1338,yjm1341,yjm1342,yjm1355,yjm1356,yjm1381,yjm1383,yjm1385,yjm1386,yjm1387,yjm1388,yjm1389,yjm1399,yjm1400,yjm1401,yjm1402,yjm1415,yjm1417,yjm1419,yjm1434,yjm1443,yjm1444,yjm1447,yjm1450,yjm1460,yjm1463,yjm1477,yjm1478,yjm1479,yjm1526,yjm1527,y…
LTR_TY1_2_ present in S288c	S288c	Chr04	802956	803235	48	S288c,yjm1078,yjm1129,yjm1190,yjm1242,yjm1304,yjm1332,yjm1336,yjm1341,yjm1356,yjm1383,yjm1386,yjm1415,yjm1417,yjm1419,yjm1433,yjm1450,yjm1463,yjm1477,yjm1478,yjm1526,yjm1549,yjm189,yjm193,yjm244,yjm248,yjm270,yjm271,yjm320,yjm326,yjm453,yjm456,yjm541,yjm554,yjm555,yjm682,yjm683,yjm693,yjm969,yjm972,yjm975,yjm978,yjm981,yjm984,yjm987,yjm990,yjm993,yjm996,
LTR_TY1_2_ present in S288c	S288c	Chr04	871872	872144	4	S288c,yjm1355,yjm1383,yjm1385,
LTR_TY1_2_ present in S288c	S288c	Chr04	877993	877784	12	S288c,yjm1248,yjm1355,yjm1385,yjm1386,yjm1399,yjm1419,yjm1433,yjm326,yjm470,yjm555,yjm693,
LTR_TY1_2_ present in S288c	S288c	Chr04	884169	883887	1	S288c,
LTR_TY1_2_ present in S288c	S288c	Chr04	981222	981494	7	S288c,yjm1129,yjm1341,yjm1381,yjm1401,yjm1574,yjm555,
LTR_TY1_2_ present in S288c	S288c	Chr04	986849	987121	1	S288c,
LTR_TY1_2_ present in S288c	S288c	Chr04	987432	987150	7	S288c,yjm1133,yjm1248,yjm1444,yjm1447,yjm1478,yjm627,
LTR_TY1_2_ present in S288c	S288c	Chr04	992657	992742	47	S288c,yjm1083,yjm1129,yjm1133,yjm1190,yjm1250,yjm1273,yjm1304,yjm1307,yjm1311,yjm1326,yjm1342,yjm1355,yjm1385,yjm1386,yjm1388,yjm1389,yjm1399,yjm1400,yjm1402,yjm1419,yjm1434,yjm1443,yjm1444,yjm1447,yjm1450,yjm1460,yjm1478,yjm1479,yjm1526,yjm1527,yjm1549,yjm1573,yjm1592,yjm1615,yjm195,yjm244,yjm270,yjm326,yjm428,yjm451,yjm456,yjm470,yjm555,yjm682,yjm683,yjm689,
LTR_TY1_2_ present in S288c	S288c	Chr04	1095818	1096104	5	S288c,yjm1078,yjm1190,yjm248,yjm450,
LTR_TY1_2_ present in S288c	S288c	Chr04	1101406	1101692	77	S288c,yjm1083,yjm1129,yjm1133,yjm1190,yjm1199,yjm1202,yjm1208,yjm1242,yjm1250,yjm1273,yjm1304,yjm1307,yjm1311,yjm1326,yjm1332,yjm1336,yjm1338,yjm1341,yjm1342,yjm1355,yjm1356,yjm1381,yjm1383,yjm1385,yjm1386,yjm1387,yjm1388,yjm1389,yjm1400,yjm1401,yjm1402,yjm1415,yjm1417,yjm1419,yjm1433,yjm1434,yjm1443,yjm1444,yjm1460,yjm1463,yjm1477,yjm1478,yjm1479,yjm1526,yjm1527,yjm1573,yjm1574,yjm1592,yjm1615,y…
LTR_TY1_2_ present in S288c	S288c	Chr04	1175367	1175647	49	S288c,yjm1078,yjm1083,yjm1129,yjm1133,yjm1242,yjm1252,yjm1311,yjm1332,yjm1336,yjm1338,yjm1341,yjm1355,yjm1356,yjm1381,yjm1383,yjm1386,yjm1415,yjm1417,yjm1419,yjm1450,yjm1477,yjm1526,yjm1527,yjm1574,yjm1615,yjm189,yjm193,yjm244,yjm248,yjm270,yjm271,yjm320,yjm326,yjm428,yjm456,yjm541,yjm554,yjm682,yjm693,yjm969,yjm972,yjm978,yjm981,yjm984,yjm987,yjm990,yjm993,yjm996,
LTR_TY1_2_ present in S288c	S288c	Chr04	1206755	1207037	1	S288c,
LTR_TY1_2_ present in S288c	S288c	Chr04	1352695	1352967	4	S288c,yjm1383,yjm1401,yjm453,
LTR_TY1_2_ present in S288c	S288c	Chr05	62193	62464	51	S288c,yjm1129,yjm1133,yjm1190,yjm1242,yjm1244,yjm1273,yjm1311,yjm1332,yjm1336,yjm1338,yjm1341,yjm1356,yjm1385,yjm1387,yjm1402,yjm1415,yjm1417,yjm1418,yjm1434,yjm1443,yjm1444,yjm1447,yjm1477,yjm1526,yjm1527,yjm1573,yjm1574,yjm189,yjm195,yjm244,yjm248,yjm270,yjm271,yjm320,yjm326,yjm451,yjm453,yjm456,yjm682,yjm683,yjm969,yjm972,yjm975,yjm978,yjm981,yjm984,yjm987,yjm990,yjm993,yjm996,
LTR_TY1_2_ present in S288c	S288c	Chr05	135888	135616	3	S288c,yjm193,yjm693,
LTR_TY1_2_ present in S288c	S288c	Chr05	138272	138553	70	S288c,yjm1078,yjm1129,yjm1133,yjm1190,yjm1199,yjm1202,yjm1242,yjm1244,yjm1250,yjm1252,yjm1304,yjm1311,yjm1326,yjm1332,yjm1336,yjm1338,yjm1341,yjm1342,yjm1355,yjm1356,yjm1385,yjm1386,yjm1387,yjm1415,yjm1417,yjm1418,yjm1419,yjm1433,yjm1443,yjm1450,yjm1460,yjm1463,yjm1477,yjm1478,yjm1526,yjm1527,yjm1549,yjm1574,yjm193,yjm195,yjm244,yjm248,yjm270,yjm271,yjm320,yjm326,yjm428,yjm450,yjm451,yjm453,yjm45…
LTR_TY1_2_ present in S288c	S288c	Chr05	312276	312441	66	S288c,yjm1129,yjm1133,yjm1190,yjm1199,yjm1202,yjm1242,yjm1244,yjm1250,yjm1304,yjm1311,yjm1326,yjm1332,yjm1336,yjm1338,yjm1341,yjm1355,yjm1356,yjm1385,yjm1386,yjm1387,yjm1415,yjm1417,yjm1419,yjm1433,yjm1443,yjm1450,yjm1460,yjm1463,yjm1477,yjm1478,yjm1526,yjm1527,yjm1549,yjm1574,yjm189,yjm193,yjm244,yjm270,yjm271,yjm320,yjm326,yjm450,yjm451,yjm453,yjm456,yjm470,yjm541,yjm554,yjm555,yjm627,yjm681,yj…
LTR_TY1_2_ present in S288c	S288c	Chr05	431771	431500	4	S288c,yjm1190,yjm1460,yjm1549,
LTR_TY1_2_ present in S288c	S288c	Chr05	436226	435954	39	S288c,yjm1078,yjm1129,yjm1242,yjm1244,yjm1307,yjm1311,yjm1332,yjm1336,yjm1341,yjm1356,yjm1383,yjm1386,yjm1387,yjm1415,yjm1417,yjm1433,yjm1444,yjm1463,yjm1477,yjm1478,yjm1526,yjm1527,yjm244,yjm453,yjm627,yjm681,yjm682,yjm683,yjm969,yjm972,yjm975,yjm978,yjm981,yjm984,yjm987,yjm990,yjm993,yjm996,
LTR_TY1_2_ present in S288c	S288c	Chr05	443682	443397	21	S288c,yjm1190,yjm1199,yjm1202,yjm1208,yjm1248,yjm1252,yjm1273,yjm1338,yjm1434,yjm1443,yjm1549,yjm195,yjm320,yjm451,yjm456,yjm470,yjm541,yjm554,yjm555,yjm693,
LTR_TY1_2_ present in S288c	S288c	Chr05	449350	449622	2	S288c,yjm1383,
LTR_TY1_2_ present in S288c	S288c	Chr05	487885	488157	1	S288c,
LTR_TY1_2_ present in S288c	S288c	Chr05	492782	492696	7	S288c,yjm1304,yjm320,yjm428,yjm541,yjm554,yjm555,
LTR_TY1_2_ present in S288c	S288c	Chr06	137707	137912	94	S288c,yjm1078,yjm1083,yjm1129,yjm1133,yjm1190,yjm1199,yjm1202,yjm1208,yjm1242,yjm1244,yjm1248,yjm1250,yjm1252,yjm1273,yjm1304,yjm1307,yjm1311,yjm1326,yjm1332,yjm1336,yjm1338,yjm1341,yjm1342,yjm1355,yjm1356,yjm1381,yjm1383,yjm1385,yjm1386,yjm1387,yjm1388,yjm1389,yjm1399,yjm1400,yjm1401,yjm1402,yjm1415,yjm1417,yjm1418,yjm1419,yjm1433,yjm1434,yjm1439,yjm1443,yjm1444,yjm1447,yjm1450,yjm1460,yjm1463,y…
LTR_TY1_2_ present in S288c	S288c	Chr06	143591	143863	1	S288c,
LTR_TY1_2_ present in S288c	S288c	Chr06	162084	161816	94	S288c,yjm1078,yjm1083,yjm1129,yjm1133,yjm1190,yjm1199,yjm1202,yjm1208,yjm1242,yjm1244,yjm1248,yjm1250,yjm1252,yjm1273,yjm1304,yjm1307,yjm1311,yjm1326,yjm1332,yjm1336,yjm1338,yjm1341,yjm1342,yjm1355,yjm1356,yjm1381,yjm1383,yjm1385,yjm1386,yjm1387,yjm1388,yjm1389,yjm1399,yjm1400,yjm1401,yjm1402,yjm1415,yjm1417,yjm1418,yjm1419,yjm1433,yjm1434,yjm1439,yjm1443,yjm1444,yjm1447,yjm1450,yjm1460,yjm1463,y…
LTR_TY1_2_ present in S288c	S288c	Chr07	111454	111228	33	S288c,yjm1208,yjm1273,yjm1307,yjm1311,yjm1342,yjm1381,yjm1386,yjm1388,yjm1389,yjm1400,yjm1401,yjm1402,yjm1418,yjm1434,yjm1443,yjm1447,yjm1460,yjm1527,yjm1573,yjm1592,yjm320,yjm326,yjm450,yjm451,yjm456,yjm470,yjm541,yjm554,yjm555,yjm681,yjm682,yjm683,
LTR_TY1_2_ present in S288c	S288c	Chr07	114990	115269	90	S288c,yjm1078,yjm1083,yjm1129,yjm1133,yjm1190,yjm1199,yjm1202,yjm1208,yjm1242,yjm1244,yjm1248,yjm1250,yjm1252,yjm1273,yjm1304,yjm1307,yjm1311,yjm1326,yjm1332,yjm1336,yjm1341,yjm1342,yjm1355,yjm1356,yjm1381,yjm1383,yjm1385,yjm1386,yjm1387,yjm1388,yjm1389,yjm1399,yjm1400,yjm1401,yjm1402,yjm1415,yjm1417,yjm1433,yjm1434,yjm1439,yjm1443,yjm1444,yjm1447,yjm1450,yjm1460,yjm1463,yjm1477,yjm1478,yjm1526,y…
LTR_TY1_2_ present in S288c	S288c	Chr07	402010	402278	33	S288c,yjm1199,yjm1202,yjm1208,yjm1248,yjm1273,yjm1304,yjm1311,yjm1342,yjm1385,yjm1386,yjm1388,yjm1389,yjm1401,yjm1402,yjm1418,yjm1419,yjm1434,yjm1439,yjm1443,yjm1460,yjm1573,yjm1592,yjm1615,yjm189,yjm195,yjm320,yjm428,yjm456,yjm470,yjm541,yjm554,yjm555,
LTR_TY1_2_ present in S288c	S288c	Chr07	535262	535530	4	S288c,yjm1250,yjm1381,yjm689,
LTR_TY1_2_ present in S288c	S288c	Chr07	541399	541685	1	S288c,
LTR_TY1_2_ present in S288c	S288c	Chr07	562125	561843	5	S288c,yjm195,yjm271,yjm320,yjm541,
LTR_TY1_2_ present in S288c	S288c	Chr07	567709	567427	1	S288c,
LTR_TY1_2_ present in S288c	S288c	Chr07	569021	568749	1	S288c,
LTR_TY1_2_ present in S288c	S288c	Chr07	574649	574377	1	S288c,
LTR_TY1_2_ present in S288c	S288c	Chr07	735594	735869	39	S288c,yjm1078,yjm1129,yjm1133,yjm1190,yjm1199,yjm1202,yjm1208,yjm1248,yjm1252,yjm1273,yjm1304,yjm1311,yjm1342,yjm1388,yjm1389,yjm1400,yjm1401,yjm1402,yjm1434,yjm1439,yjm1444,yjm1447,yjm1460,yjm1479,yjm1527,yjm1549,yjm1573,yjm1592,yjm1615,yjm195,yjm248,yjm428,yjm450,yjm451,yjm627,yjm975,yjm981,yjm984,
LTR_TY1_2_ present in S288c	S288c	Chr07	774036	774162	83	S288c,yjm1078,yjm1129,yjm1133,yjm1190,yjm1199,yjm1208,yjm1242,yjm1244,yjm1248,yjm1250,yjm1252,yjm1273,yjm1307,yjm1326,yjm1332,yjm1336,yjm1338,yjm1341,yjm1355,yjm1356,yjm1381,yjm1383,yjm1385,yjm1387,yjm1388,yjm1389,yjm1401,yjm1402,yjm1415,yjm1417,yjm1418,yjm1419,yjm1433,yjm1434,yjm1439,yjm1443,yjm1444,yjm1447,yjm1450,yjm1460,yjm1463,yjm1477,yjm1478,yjm1526,yjm1573,yjm1574,yjm1592,yjm1615,yjm189,yj…
LTR_TY1_2_ present in S288c	S288c	Chr07	811498	811770	2	S288c,yjm453,
LTR_TY1_2_ present in S288c	S288c	Chr07	817673	817393	1	S288c,
LTR_TY1_2_ present in S288c	S288c	Chr07	823255	822975	7	S288c,yjm1248,yjm1304,yjm1439,yjm195,yjm453,yjm627,
LTR_TY1_2_ present in S288c	S288c	Chr07	876004	876279	93	S288c,yjm1078,yjm1083,yjm1129,yjm1133,yjm1190,yjm1199,yjm1202,yjm1208,yjm1242,yjm1244,yjm1248,yjm1250,yjm1252,yjm1273,yjm1304,yjm1307,yjm1311,yjm1326,yjm1332,yjm1336,yjm1338,yjm1341,yjm1342,yjm1355,yjm1356,yjm1381,yjm1383,yjm1385,yjm1386,yjm1387,yjm1388,yjm1389,yjm1399,yjm1400,yjm1401,yjm1402,yjm1415,yjm1417,yjm1418,yjm1419,yjm1433,yjm1434,yjm1439,yjm1443,yjm1444,yjm1447,yjm1450,yjm1460,yjm1463,y…
LTR_TY1_2_ present in S288c	S288c	Chr07	931739	932019	53	S288c,yjm1078,yjm1129,yjm1190,yjm1199,yjm1202,yjm1242,yjm1244,yjm1250,yjm1252,yjm1307,yjm1311,yjm1332,yjm1336,yjm1341,yjm1355,yjm1356,yjm1383,yjm1385,yjm1386,yjm1387,yjm1399,yjm1415,yjm1417,yjm1433,yjm1463,yjm1477,yjm1478,yjm1526,yjm1527,yjm1549,yjm1574,yjm189,yjm193,yjm244,yjm248,yjm270,yjm271,yjm450,yjm453,yjm541,yjm554,yjm681,yjm969,yjm972,yjm975,yjm978,yjm981,yjm984,yjm987,yjm990,yjm993,yjm99…
LTR_TY1_2_ present in S288c	S288c	Chr08	92048	91777	4	S288c,yjm1208,yjm1401,yjm1447,
LTR_TY1_2_ present in S288c	S288c	Chr08	116701	116421	56	S288c,yjm1078,yjm1129,yjm1133,yjm1190,yjm1199,yjm1242,yjm1244,yjm1250,yjm1252,yjm1304,yjm1307,yjm1311,yjm1332,yjm1336,yjm1338,yjm1341,yjm1356,yjm1385,yjm1387,yjm1399,yjm1415,yjm1417,yjm1418,yjm1433,yjm1443,yjm1463,yjm1477,yjm1478,yjm1526,yjm1527,yjm1549,yjm1574,yjm189,yjm244,yjm248,yjm270,yjm271,yjm326,yjm428,yjm453,yjm456,yjm541,yjm555,yjm682,yjm683,yjm969,yjm972,yjm975,yjm978,yjm981,yjm984,yjm9…
LTR_TY1_2_ present in S288c	S288c	Chr08	133730	134009	1	S288c,
LTR_TY1_2_ present in S288c	S288c	Chr08	389458	389187	21	S288c,yjm1083,yjm1208,yjm1273,yjm1355,yjm1381,yjm1385,yjm1386,yjm1388,yjm1389,yjm1433,yjm1434,yjm1447,yjm1450,yjm1549,yjm1592,yjm1615,yjm271,yjm456,yjm470,yjm693,
LTR_TY1_2_ present in S288c	S288c	Chr08	466585	466863	92	S288c,yjm1078,yjm1083,yjm1129,yjm1133,yjm1190,yjm1199,yjm1202,yjm1208,yjm1242,yjm1244,yjm1248,yjm1250,yjm1252,yjm1273,yjm1304,yjm1307,yjm1311,yjm1326,yjm1332,yjm1336,yjm1338,yjm1341,yjm1342,yjm1355,yjm1356,yjm1381,yjm1383,yjm1385,yjm1386,yjm1387,yjm1388,yjm1389,yjm1400,yjm1401,yjm1402,yjm1415,yjm1417,yjm1418,yjm1433,yjm1434,yjm1439,yjm1443,yjm1444,yjm1447,yjm1450,yjm1460,yjm1463,yjm1477,yjm1478,y…
LTR_TY1_2_ present in S288c	S288c	Chr08	543890	543610	1	S288c,
LTR_TY1_2_ present in S288c	S288c	Chr08	549586	549306	1	S288c,
LTR_TY1_2_ present in S288c	S288c	Chr09	197437	197140	78	S288c,yjm1078,yjm1129,yjm1133,yjm1190,yjm1199,yjm1208,yjm1242,yjm1244,yjm1250,yjm1252,yjm1273,yjm1304,yjm1307,yjm1311,yjm1326,yjm1332,yjm1336,yjm1338,yjm1341,yjm1342,yjm1355,yjm1356,yjm1381,yjm1383,yjm1385,yjm1386,yjm1387,yjm1399,yjm1402,yjm1415,yjm1417,yjm1418,yjm1419,yjm1433,yjm1434,yjm1443,yjm1444,yjm1447,yjm1463,yjm1477,yjm1478,yjm1526,yjm1527,yjm1549,yjm1573,yjm1574,yjm189,yjm193,yjm244,yjm2…
LTR_TY1_2_ present in S288c	S288c	Chr09	246271	246542	13	S288c,yjm1307,yjm1388,yjm1389,yjm1400,yjm1450,yjm1460,yjm1479,yjm1592,yjm326,yjm451,yjm682,yjm683,
LTR_TY1_2_ present in S288c	S288c	Chr09	300684	300419	90	S288c,yjm1078,yjm1083,yjm1129,yjm1133,yjm1190,yjm1199,yjm1202,yjm1208,yjm1242,yjm1244,yjm1248,yjm1250,yjm1252,yjm1273,yjm1304,yjm1307,yjm1311,yjm1326,yjm1332,yjm1336,yjm1338,yjm1341,yjm1342,yjm1355,yjm1356,yjm1381,yjm1383,yjm1385,yjm1386,yjm1387,yjm1388,yjm1389,yjm1400,yjm1401,yjm1402,yjm1415,yjm1417,yjm1418,yjm1433,yjm1434,yjm1439,yjm1443,yjm1444,yjm1447,yjm1450,yjm1460,yjm1463,yjm1477,yjm1478,y…
LTR_TY1_2_ present in S288c	S288c	Chr10	204063	203793	2	S288c,yjm1400,
LTR_TY1_2_ present in S288c	S288c	Chr10	204115	204392	83	S288c,yjm1078,yjm1083,yjm1129,yjm1133,yjm1190,yjm1199,yjm1208,yjm1242,yjm1248,yjm1250,yjm1252,yjm1273,yjm1304,yjm1307,yjm1326,yjm1332,yjm1336,yjm1338,yjm1342,yjm1355,yjm1356,yjm1381,yjm1385,yjm1386,yjm1388,yjm1389,yjm1399,yjm1400,yjm1401,yjm1402,yjm1415,yjm1417,yjm1418,yjm1433,yjm1434,yjm1439,yjm1444,yjm1447,yjm1450,yjm1460,yjm1463,yjm1477,yjm1478,yjm1479,yjm1526,yjm1527,yjm1549,yjm1573,yjm1574,y…
LTR_TY1_2_ present in S288c	S288c	Chr10	354815	354535	79	S288c,yjm1078,yjm1083,yjm1129,yjm1190,yjm1199,yjm1202,yjm1208,yjm1242,yjm1244,yjm1248,yjm1250,yjm1252,yjm1273,yjm1304,yjm1307,yjm1311,yjm1332,yjm1336,yjm1338,yjm1341,yjm1342,yjm1355,yjm1356,yjm1381,yjm1383,yjm1385,yjm1386,yjm1387,yjm1389,yjm1399,yjm1400,yjm1402,yjm1415,yjm1417,yjm1418,yjm1434,yjm1439,yjm1443,yjm1460,yjm1463,yjm1477,yjm1478,yjm1479,yjm1526,yjm1527,yjm1549,yjm1573,yjm1574,yjm1592,y…
LTR_TY1_2_ present in S288c	S288c	Chr10	472514	472800	2	S288c,yjm1401,
LTR_TY1_2_ present in S288c	S288c	Chr10	478102	478384	1	S288c,
LTR_TY1_2_ present in S288c	S288c	Chr10	483686	483972	1	S288c,
LTR_TY1_2_ present in S288c	S288c	Chr10	538154	538426	8	S288c,yjm451,yjm969,yjm975,yjm981,yjm990,yjm993,yjm996,
LTR_TY1_2_ present in S288c	S288c	Chr10	540817	541086	88	S288c,yjm1078,yjm1083,yjm1129,yjm1133,yjm1190,yjm1199,yjm1202,yjm1208,yjm1242,yjm1244,yjm1248,yjm1250,yjm1252,yjm1273,yjm1304,yjm1307,yjm1311,yjm1326,yjm1332,yjm1336,yjm1338,yjm1341,yjm1342,yjm1355,yjm1356,yjm1381,yjm1385,yjm1386,yjm1387,yjm1388,yjm1389,yjm1399,yjm1400,yjm1401,yjm1402,yjm1415,yjm1417,yjm1418,yjm1433,yjm1434,yjm1439,yjm1443,yjm1444,yjm1450,yjm1460,yjm1463,yjm1477,yjm1478,yjm1479,y…
LTR_TY1_2_ present in S288c	S288c	Chr10	541376	541103	1	S288c,
LTR_TY1_2_ present in S288c	S288c	Chr11	302574	302334	92	S288c,yjm1078,yjm1083,yjm1129,yjm1133,yjm1190,yjm1199,yjm1202,yjm1208,yjm1242,yjm1244,yjm1248,yjm1250,yjm1252,yjm1273,yjm1304,yjm1307,yjm1311,yjm1326,yjm1332,yjm1336,yjm1338,yjm1341,yjm1342,yjm1355,yjm1356,yjm1381,yjm1383,yjm1385,yjm1386,yjm1387,yjm1389,yjm1400,yjm1401,yjm1402,yjm1415,yjm1417,yjm1418,yjm1419,yjm1433,yjm1434,yjm1439,yjm1443,yjm1444,yjm1447,yjm1450,yjm1460,yjm1463,yjm1477,yjm1478,y…
LTR_TY1_2_ present in S288c	S288c	Chr11	313882	313603	1	S288c,
LTR_TY1_2_ present in S288c	S288c	Chr11	314244	314501	2	S288c,yjm1399,
LTR_TY1_2_ present in S288c	S288c	Chr11	458420	458140	10	S288c,yjm1250,yjm1311,yjm1326,yjm1355,yjm1386,yjm1450,yjm270,yjm554,yjm555,
LTR_TY1_2_ present in S288c	S288c	Chr11	517733	517453	5	S288c,yjm1208,yjm1250,yjm1615,yjm541,
LTR_TY1_2_ present in S288c	S288c	Chr12	92329	92050	94	S288c,yjm1078,yjm1083,yjm1129,yjm1133,yjm1190,yjm1199,yjm1202,yjm1208,yjm1242,yjm1244,yjm1248,yjm1250,yjm1252,yjm1273,yjm1304,yjm1307,yjm1311,yjm1326,yjm1332,yjm1336,yjm1338,yjm1341,yjm1342,yjm1355,yjm1356,yjm1381,yjm1383,yjm1385,yjm1386,yjm1387,yjm1388,yjm1389,yjm1399,yjm1400,yjm1401,yjm1402,yjm1415,yjm1417,yjm1418,yjm1419,yjm1433,yjm1434,yjm1439,yjm1443,yjm1444,yjm1447,yjm1450,yjm1460,yjm1463,y…
LTR_TY1_2_ present in S288c	S288c	Chr12	215366	215080	2	S288c,yjm681,
LTR_TY1_2_ present in S288c	S288c	Chr12	220954	220668	1	S288c,
LTR_TY1_2_ present in S288c	S288c	Chr12	476259	475974	1	S288c,
LTR_TY1_2_ present in S288c	S288c	Chr12	481846	481561	1	S288c,
LTR_TY1_2_ present in S288c	S288c	Chr12	593196	593478	1	S288c,
LTR_TY1_2_ present in S288c	S288c	Chr12	598780	599062	1	S288c,
LTR_TY1_2_ present in S288c	S288c	Chr12	650875	651157	1	S288c,
LTR_TY1_2_ present in S288c	S288c	Chr12	656461	656743	1	S288c,
LTR_TY1_2_ present in S288c	S288c	Chr12	731949	731668	1	S288c,
LTR_TY1_2_ present in S288c	S288c	Chr12	796815	797067	91	S288c,yjm1078,yjm1083,yjm1129,yjm1133,yjm1190,yjm1199,yjm1202,yjm1208,yjm1242,yjm1244,yjm1248,yjm1250,yjm1273,yjm1304,yjm1307,yjm1311,yjm1326,yjm1332,yjm1336,yjm1338,yjm1341,yjm1342,yjm1355,yjm1356,yjm1381,yjm1383,yjm1385,yjm1386,yjm1387,yjm1388,yjm1389,yjm1399,yjm1400,yjm1401,yjm1402,yjm1415,yjm1417,yjm1418,yjm1419,yjm1433,yjm1434,yjm1439,yjm1443,yjm1444,yjm1447,yjm1450,yjm1460,yjm1463,yjm1477,y…
LTR_TY1_2_ present in S288c	S288c	Chr12	818352	818073	92	S288c,yjm1078,yjm1083,yjm1129,yjm1133,yjm1190,yjm1199,yjm1202,yjm1208,yjm1242,yjm1244,yjm1248,yjm1250,yjm1252,yjm1273,yjm1304,yjm1307,yjm1311,yjm1326,yjm1332,yjm1336,yjm1338,yjm1341,yjm1342,yjm1355,yjm1356,yjm1381,yjm1383,yjm1385,yjm1386,yjm1387,yjm1388,yjm1389,yjm1399,yjm1400,yjm1401,yjm1402,yjm1415,yjm1417,yjm1418,yjm1419,yjm1433,yjm1434,yjm1439,yjm1443,yjm1444,yjm1447,yjm1450,yjm1460,yjm1463,y…
LTR_TY1_2_ present in S288c	S288c	Chr12	941243	941515	1	S288c,
LTR_TY1_2_ present in S288c	S288c	Chr12	946870	947142	1	S288c,
LTR_TY1_2_ present in S288c	S288c	Chr12	976538	976265	6	S288c,yjm1248,yjm1389,yjm1439,yjm1450,yjm1592,
LTR_TY1_2_ present in S288c	S288c	Chr12	981649	981377	4	S288c,yjm1526,yjm1574,yjm555,
LTR_TY1_2_ present in S288c	S288c	Chr13	168630	168359	14	S288c,yjm1083,yjm1208,yjm1250,yjm1311,yjm1336,yjm1385,yjm1388,yjm1389,yjm1444,yjm1460,yjm1463,yjm1592,yjm1615,
LTR_TY1_2_ present in S288c	S288c	Chr13	184221	184481	1	S288c,
LTR_TY1_2_ present in S288c	S288c	Chr13	189803	190083	3	S288c,yjm1389,yjm1592,
LTR_TY1_2_ present in S288c	S288c	Chr13	196383	196668	2	S288c,yjm1083,
LTR_TY1_2_ present in S288c	S288c	Chr13	201970	202234	1	S288c,
LTR_TY1_2_ present in S288c	S288c	Chr13	357285	357005	1	S288c,
LTR_TY1_2_ present in S288c	S288c	Chr13	362867	362587	6	S288c,yjm1273,yjm1434,yjm470,yjm683,yjm689,
LTR_TY1_2_ present in S288c	S288c	Chr13	372983	372697	1	S288c,
LTR_TY1_2_ present in S288c	S288c	Chr13	378571	378285	1	S288c,
LTR_TY1_2_ present in S288c	S288c	Chr13	463403	463150	88	S288c,yjm1078,yjm1129,yjm1133,yjm1190,yjm1199,yjm1202,yjm1208,yjm1242,yjm1244,yjm1248,yjm1250,yjm1252,yjm1273,yjm1304,yjm1307,yjm1311,yjm1326,yjm1332,yjm1336,yjm1338,yjm1341,yjm1355,yjm1356,yjm1381,yjm1383,yjm1385,yjm1387,yjm1388,yjm1389,yjm1399,yjm1400,yjm1401,yjm1402,yjm1415,yjm1417,yjm1418,yjm1434,yjm1439,yjm1443,yjm1444,yjm1447,yjm1450,yjm1460,yjm1463,yjm1477,yjm1478,yjm1479,yjm1526,yjm1527,y…
LTR_TY1_2_ present in S288c	S288c	Chr13	504397	504677	61	S288c,yjm1078,yjm1129,yjm1133,yjm1190,yjm1199,yjm1202,yjm1242,yjm1244,yjm1248,yjm1250,yjm1252,yjm1304,yjm1311,yjm1326,yjm1332,yjm1336,yjm1341,yjm1355,yjm1356,yjm1381,yjm1385,yjm1386,yjm1387,yjm1399,yjm1401,yjm1415,yjm1418,yjm1419,yjm1443,yjm1444,yjm1450,yjm1477,yjm1478,yjm1526,yjm1527,yjm1549,yjm1574,yjm189,yjm195,yjm248,yjm270,yjm320,yjm326,yjm450,yjm541,yjm554,yjm555,yjm682,yjm683,yjm693,yjm969…
LTR_TY1_2_ present in S288c	S288c	Chr13	768599	768871	3	S288c,yjm1199,yjm1202,
LTR_TY1_2_ present in S288c	S288c	Chr13	837488	837743	75	S288c,yjm1078,yjm1083,yjm1129,yjm1190,yjm1199,yjm1202,yjm1208,yjm1242,yjm1244,yjm1250,yjm1252,yjm1304,yjm1307,yjm1326,yjm1332,yjm1336,yjm1341,yjm1342,yjm1355,yjm1356,yjm1381,yjm1383,yjm1387,yjm1389,yjm1399,yjm1401,yjm1415,yjm1417,yjm1418,yjm1419,yjm1439,yjm1443,yjm1444,yjm1450,yjm1460,yjm1463,yjm1477,yjm1478,yjm1526,yjm1527,yjm1549,yjm1574,yjm1592,yjm1615,yjm189,yjm195,yjm244,yjm270,yjm320,yjm326…
LTR_TY1_2_ present in S288c	S288c	Chr14	96890	96610	5	S288c,yjm1083,yjm1549,yjm195,yjm470,
LTR_TY1_2_ present in S288c	S288c	Chr14	102472	102192	6	S288c,yjm1083,yjm1355,yjm1383,yjm1385,yjm470,
LTR_TY1_2_ present in S288c	S288c	Chr14	519214	519496	1	S288c,
LTR_TY1_2_ present in S288c	S288c	Chr14	524780	525062	1	S288c,
LTR_TY1_2_ present in S288c	S288c	Chr14	562313	562041	1	S288c,
LTR_TY1_2_ present in S288c	S288c	Chr14	567941	567663	1	S288c,
LTR_TY1_2_ present in S288c	S288c	Chr14	632110	632008	87	S288c,yjm1078,yjm1083,yjm1129,yjm1133,yjm1190,yjm1199,yjm1202,yjm1208,yjm1242,yjm1244,yjm1248,yjm1252,yjm1273,yjm1304,yjm1307,yjm1311,yjm1326,yjm1332,yjm1336,yjm1338,yjm1341,yjm1342,yjm1355,yjm1356,yjm1381,yjm1383,yjm1385,yjm1386,yjm1387,yjm1388,yjm1389,yjm1399,yjm1400,yjm1401,yjm1402,yjm1415,yjm1417,yjm1418,yjm1419,yjm1434,yjm1439,yjm1444,yjm1450,yjm1460,yjm1463,yjm1477,yjm1478,yjm1479,yjm1526,y…
LTR_TY1_2_ present in S288c	S288c	Chr14	726894	726624	57	S288c,yjm1078,yjm1129,yjm1133,yjm1199,yjm1202,yjm1242,yjm1244,yjm1248,yjm1250,yjm1252,yjm1304,yjm1326,yjm1332,yjm1336,yjm1356,yjm1381,yjm1383,yjm1385,yjm1387,yjm1415,yjm1417,yjm1419,yjm1433,yjm1439,yjm1443,yjm1447,yjm1450,yjm1477,yjm1526,yjm1549,yjm189,yjm195,yjm244,yjm248,yjm320,yjm326,yjm428,yjm450,yjm453,yjm470,yjm554,yjm555,yjm681,yjm682,yjm683,yjm689,yjm969,yjm972,yjm975,yjm978,yjm981,yjm984…
LTR_TY1_2_ present in S288c	S288c	Chr15	3173	2894	13	S288c,yjm1208,yjm1252,yjm1273,yjm1402,yjm1418,yjm1419,yjm1434,yjm1443,yjm1444,yjm1573,yjm1615,yjm248,
LTR_TY1_2_ present in S288c	S288c	Chr15	113575	113294	19	S288c,yjm1083,yjm1208,yjm1248,yjm1250,yjm1311,yjm1355,yjm1385,yjm1388,yjm1399,yjm1419,yjm1439,yjm1450,yjm1615,yjm195,yjm326,yjm470,yjm627,yjm682,
LTR_TY1_2_ present in S288c	S288c	Chr15	117754	118040	1	S288c,
LTR_TY1_2_ present in S288c	S288c	Chr15	123342	123628	1	S288c,
LTR_TY1_2_ present in S288c	S288c	Chr15	228126	227873	90	S288c,yjm1078,yjm1083,yjm1129,yjm1133,yjm1190,yjm1199,yjm1202,yjm1208,yjm1242,yjm1244,yjm1248,yjm1250,yjm1252,yjm1273,yjm1304,yjm1307,yjm1311,yjm1326,yjm1332,yjm1336,yjm1338,yjm1341,yjm1342,yjm1355,yjm1356,yjm1381,yjm1385,yjm1386,yjm1387,yjm1388,yjm1389,yjm1400,yjm1401,yjm1402,yjm1415,yjm1417,yjm1418,yjm1433,yjm1434,yjm1439,yjm1443,yjm1444,yjm1447,yjm1450,yjm1460,yjm1463,yjm1477,yjm1478,yjm1479,y…
LTR_TY1_2_ present in S288c	S288c	Chr15	594872	595152	87	S288c,yjm1078,yjm1083,yjm1129,yjm1133,yjm1190,yjm1199,yjm1208,yjm1242,yjm1244,yjm1250,yjm1252,yjm1273,yjm1304,yjm1307,yjm1311,yjm1326,yjm1332,yjm1336,yjm1338,yjm1355,yjm1356,yjm1381,yjm1383,yjm1385,yjm1386,yjm1387,yjm1388,yjm1389,yjm1399,yjm1400,yjm1401,yjm1402,yjm1415,yjm1417,yjm1418,yjm1419,yjm1433,yjm1434,yjm1439,yjm1443,yjm1444,yjm1447,yjm1450,yjm1460,yjm1463,yjm1477,yjm1478,yjm1479,yjm1526,y…
LTR_TY1_2_ present in S288c	S288c	Chr15	664865	665136	46	S288c,yjm1078,yjm1129,yjm1133,yjm1202,yjm1208,yjm1242,yjm1244,yjm1250,yjm1252,yjm1304,yjm1326,yjm1332,yjm1336,yjm1341,yjm1356,yjm1381,yjm1415,yjm1417,yjm1450,yjm1477,yjm1478,yjm1527,yjm1615,yjm189,yjm244,yjm248,yjm320,yjm453,yjm456,yjm470,yjm541,yjm554,yjm683,yjm689,yjm693,yjm969,yjm972,yjm975,yjm978,yjm981,yjm984,yjm987,yjm990,yjm993,yjm996,
LTR_TY1_2_ present in S288c	S288c	Chr15	703587	703442	70	S288c,yjm1078,yjm1083,yjm1129,yjm1133,yjm1199,yjm1202,yjm1242,yjm1244,yjm1248,yjm1250,yjm1252,yjm1273,yjm1304,yjm1326,yjm1332,yjm1336,yjm1338,yjm1341,yjm1342,yjm1355,yjm1356,yjm1381,yjm1383,yjm1400,yjm1402,yjm1415,yjm1417,yjm1418,yjm1434,yjm1439,yjm1443,yjm1447,yjm1460,yjm1463,yjm1477,yjm1479,yjm1526,yjm1527,yjm1549,yjm1573,yjm1574,yjm1615,yjm189,yjm193,yjm195,yjm244,yjm248,yjm270,yjm271,yjm326,y…
LTR_TY1_2_ present in S288c	S288c	Chr15	703670	703753	55	S288c,yjm1078,yjm1083,yjm1129,yjm1133,yjm1199,yjm1244,yjm1248,yjm1250,yjm1252,yjm1304,yjm1332,yjm1336,yjm1338,yjm1341,yjm1342,yjm1355,yjm1356,yjm1381,yjm1383,yjm1401,yjm1415,yjm1417,yjm1418,yjm1439,yjm1443,yjm1447,yjm1450,yjm1463,yjm1526,yjm1527,yjm1574,yjm1615,yjm189,yjm193,yjm195,yjm244,yjm248,yjm270,yjm271,yjm453,yjm456,yjm470,yjm627,yjm693,yjm969,yjm972,yjm975,yjm978,yjm981,yjm984,yjm987,yjm9…
LTR_TY1_2_ present in S288c	S288c	Chr15	704345	704074	3	S288c,yjm683,yjm969,
LTR_TY1_2_ present in S288c	S288c	Chr15	709973	709702	6	S288c,yjm1208,yjm1332,yjm1399,yjm1439,yjm1615,
LTR_TY1_2_ present in S288c	S288c	Chr15	970338	970610	9	S288c,yjm1199,yjm1244,yjm1250,yjm1385,yjm1549,yjm189,yjm326,yjm682,
LTR_TY1_2_ present in S288c	S288c	Chr15	975965	976237	1	S288c,
LTR_TY1_2_ present in S288c	S288c	Chr15	980540	980260	10	S288c,yjm1208,yjm1478,yjm1615,yjm193,yjm271,yjm320,yjm554,yjm555,yjm683,
LTR_TY1_2_ present in S288c	S288c	Chr16	56503	56788	1	S288c,
LTR_TY1_2_ present in S288c	S288c	Chr16	62090	62375	1	S288c,
LTR_TY1_2_ present in S288c	S288c	Chr16	62440	62712	1	S288c,
LTR_TY1_2_ present in S288c	S288c	Chr16	62726	62996	10	S288c,yjm1208,yjm1252,yjm1356,yjm1460,yjm1615,yjm451,yjm470,yjm555,yjm681,
LTR_TY1_2_ present in S288c	S288c	Chr16	211628	211900	1	S288c,
LTR_TY1_2_ present in S288c	S288c	Chr16	436540	436250	94	S288c,yjm1078,yjm1083,yjm1129,yjm1133,yjm1190,yjm1199,yjm1202,yjm1208,yjm1242,yjm1244,yjm1248,yjm1250,yjm1252,yjm1273,yjm1304,yjm1307,yjm1311,yjm1326,yjm1332,yjm1336,yjm1338,yjm1341,yjm1342,yjm1355,yjm1356,yjm1381,yjm1383,yjm1385,yjm1386,yjm1387,yjm1388,yjm1389,yjm1399,yjm1400,yjm1401,yjm1402,yjm1415,yjm1417,yjm1418,yjm1419,yjm1433,yjm1434,yjm1439,yjm1443,yjm1444,yjm1447,yjm1450,yjm1460,yjm1463,y…
LTR_TY1_2_ present in S288c	S288c	Chr16	560532	560812	56	S288c,yjm1078,yjm1083,yjm1129,yjm1133,yjm1202,yjm1208,yjm1242,yjm1244,yjm1250,yjm1252,yjm1304,yjm1326,yjm1332,yjm1336,yjm1341,yjm1342,yjm1355,yjm1356,yjm1381,yjm1386,yjm1387,yjm1399,yjm1401,yjm1415,yjm1417,yjm1419,yjm1433,yjm1450,yjm1463,yjm1477,yjm1526,yjm1527,yjm1574,yjm1615,yjm189,yjm244,yjm248,yjm270,yjm326,yjm450,yjm453,yjm456,yjm470,yjm555,yjm683,yjm969,yjm972,yjm975,yjm978,yjm981,yjm984,yj…
LTR_TY1_2_ present in S288c	S288c	Chr16	804927	804645	1	S288c,
LTR_TY1_2_ present in S288c	S288c	Chr16	810511	810229	1	S288c,
LTR_TY1_2_ present in S288c	S288c	Chr16	844463	844749	1	S288c,
LTR_TY1_2_ present in S288c	S288c	Chr16	850054	850340	5	S288c,yjm1133,yjm1439,yjm195,yjm627,
LTR_TY1_2_ present in S288c	S288c	Chr16	850915	850629	1	S288c,
LTR_TY1_2_ present in S288c	S288c	Chr16	856503	856217	1	S288c,
	LTR_TY3 present in S288c	Chromosome	S288c coordinates start	S288c coordinates end		Strains,
LTR_TY3 present in S288c	S288c	Chr01	182620	182959	3	S288c,yjm1381,yjm470,
LTR_TY3 present in S288c	S288c	Chr04	645501	645240	37	S288c,yjm1133,yjm1242,yjm1332,yjm1336,yjm1341,yjm1355,yjm1356,yjm1383,yjm1385,yjm1387,yjm1419,yjm1477,yjm1574,yjm270,yjm271,yjm320,yjm326,yjm450,yjm451,yjm453,yjm456,yjm541,yjm554,yjm555,yjm681,yjm682,yjm683,yjm693,yjm972,yjm978,yjm981,yjm984,yjm987,yjm990,yjm993,yjm996,
LTR_TY3 present in S288c	S288c	Chr04	651503	651420	11	S288c,yjm1356,yjm1385,yjm1549,yjm271,yjm326,yjm451,yjm456,yjm682,yjm683,yjm693,
LTR_TY3 present in S288c	S288c	Chr04	668096	668436	39	S288c,yjm1133,yjm1242,yjm1332,yjm1336,yjm1341,yjm1355,yjm1356,yjm1383,yjm1385,yjm1387,yjm1388,yjm1450,yjm1477,yjm1549,yjm1574,yjm193,yjm270,yjm271,yjm320,yjm326,yjm451,yjm453,yjm456,yjm541,yjm554,yjm555,yjm681,yjm682,yjm683,yjm693,yjm972,yjm978,yjm981,yjm984,yjm987,yjm990,yjm993,yjm996,
LTR_TY3 present in S288c	S288c	Chr04	946295	945955	28	S288c,yjm1133,yjm1242,yjm1332,yjm1336,yjm1341,yjm1356,yjm1387,yjm1419,yjm1450,yjm1477,yjm1615,yjm193,yjm270,yjm271,yjm450,yjm451,yjm453,yjm470,yjm681,yjm972,yjm978,yjm981,yjm984,yjm987,yjm990,yjm993,yjm996,
LTR_TY3 present in S288c	S288c	Chr04	1023137	1023477	31	S288c,yjm1202,yjm1242,yjm1332,yjm1336,yjm1341,yjm1355,yjm1356,yjm1383,yjm1387,yjm1450,yjm1477,yjm1574,yjm193,yjm270,yjm271,yjm320,yjm450,yjm453,yjm456,yjm541,yjm554,yjm681,yjm972,yjm978,yjm981,yjm984,yjm987,yjm990,yjm993,yjm996,
LTR_TY3 present in S288c	S288c	Chr04	1175316	1175136	48	S288c,yjm1083,yjm1133,yjm1242,yjm1248,yjm1332,yjm1336,yjm1341,yjm1355,yjm1356,yjm1383,yjm1387,yjm1388,yjm1400,yjm1434,yjm1439,yjm1447,yjm1450,yjm1460,yjm1477,yjm1479,yjm1549,yjm1574,yjm1615,yjm193,yjm195,yjm270,yjm271,yjm320,yjm326,yjm428,yjm453,yjm456,yjm470,yjm541,yjm554,yjm555,yjm681,yjm682,yjm693,yjm972,yjm978,yjm981,yjm984,yjm987,yjm990,yjm993,yjm996,
LTR_TY3 present in S288c	S288c	Chr05	250270	249930	1	S288c,
LTR_TY3 present in S288c	S288c	Chr05	434971	434631	31	S288c,yjm1244,yjm1326,yjm1332,yjm1336,yjm1356,yjm1386,yjm1415,yjm1417,yjm1433,yjm1434,yjm1463,yjm1478,yjm1479,yjm1526,yjm1574,yjm189,yjm244,yjm270,yjm271,yjm453,yjm627,yjm681,yjm969,yjm972,yjm978,yjm981,yjm987,yjm990,yjm993,yjm996,
LTR_TY3 present in S288c	S288c	Chr05	492695	492439	34	S288c,yjm1199,yjm1202,yjm1244,yjm1250,yjm1326,yjm1332,yjm1336,yjm1338,yjm1356,yjm1381,yjm1415,yjm1417,yjm1433,yjm1463,yjm1478,yjm1526,yjm1527,yjm1574,yjm189,yjm193,yjm244,yjm271,yjm453,yjm470,yjm693,yjm969,yjm972,yjm978,yjm981,yjm987,yjm990,yjm993,yjm996,
LTR_TY3 present in S288c	S288c	Chr05	498510	498422	5	S288c,yjm1208,yjm270,yjm627,yjm693,
LTR_TY3 present in S288c	S288c	Chr07	319762	319423	10	S288c,yjm1129,yjm1332,yjm1336,yjm1443,yjm1526,yjm681,yjm972,yjm987,yjm993,
LTR_TY3 present in S288c	S288c	Chr07	401616	401891	2	S288c,yjm1419,
LTR_TY3 present in S288c	S288c	Chr07	405453	405228	18	S288c,yjm1304,yjm1311,yjm1388,yjm1389,yjm1400,yjm1401,yjm1419,yjm1443,yjm1479,yjm1592,yjm428,yjm450,yjm456,yjm541,yjm554,yjm555,yjm627,
LTR_TY3 present in S288c	S288c	Chr07	707195	707534	10	S288c,yjm1248,yjm1304,yjm1338,yjm1388,yjm1389,yjm1439,yjm450,yjm453,yjm683,
LTR_TY3 present in S288c	S288c	Chr07	735982	736322	29	S288c,yjm1129,yjm1332,yjm1336,yjm1338,yjm1383,yjm1419,yjm1478,yjm1526,yjm1549,yjm189,yjm326,yjm428,yjm453,yjm456,yjm541,yjm554,yjm555,yjm681,yjm683,yjm689,yjm693,yjm969,yjm972,yjm978,yjm987,yjm990,yjm993,yjm996,
LTR_TY3 present in S288c	S288c	Chr07	845281	845598	43	S288c,yjm1129,yjm1248,yjm1304,yjm1311,yjm1332,yjm1336,yjm1338,yjm1342,yjm1383,yjm1388,yjm1400,yjm1401,yjm1419,yjm1439,yjm1443,yjm1478,yjm1479,yjm1526,yjm1527,yjm1549,yjm189,yjm195,yjm326,yjm428,yjm450,yjm453,yjm456,yjm541,yjm554,yjm555,yjm627,yjm681,yjm683,yjm689,yjm693,yjm969,yjm972,yjm978,yjm987,yjm990,yjm993,yjm996,
LTR_TY3 present in S288c	S288c	Chr09	205220	205559	20	S288c,yjm1083,yjm1202,yjm1208,yjm1417,yjm1433,yjm1479,yjm1526,yjm193,yjm195,yjm428,yjm451,yjm627,yjm969,yjm978,yjm981,yjm984,yjm990,yjm993,yjm996,
LTR_TY3 present in S288c	S288c	Chr09	324391	324734	12	S288c,yjm1083,yjm1202,yjm1208,yjm1388,yjm1479,yjm195,yjm326,yjm451,yjm682,yjm683,yjm693,
LTR_TY3 present in S288c	S288c	Chr11	202983	202644	2	S288c,yjm1383,
LTR_TY3 present in S288c	S288c	Chr14	546738	547077	3	S288c,yjm1273,yjm1434,
LTR_TY3 present in S288c	S288c	Chr14	726234	726574	6	S288c,yjm1248,yjm1615,yjm195,yjm428,yjm450,
LTR_TY3 present in S288c	S288c	Chr15	854276	854615	1	S288c,
LTR_TY3 present in S288c	S288c	Chr15	968992	969302	27	S288c,yjm1338,yjm1342,yjm1381,yjm1400,yjm1418,yjm1443,yjm1447,yjm1479,yjm1549,yjm193,yjm271,yjm453,yjm554,yjm555,yjm681,yjm682,yjm969,yjm972,yjm975,yjm978,yjm981,yjm984,yjm987,yjm990,yjm993,yjm996,
LTR_TY3 present in S288c	S288c	Chr16	769319	769659	46	S288c,yjm1078,yjm1129,yjm1202,yjm1242,yjm1244,yjm1326,yjm1332,yjm1336,yjm1341,yjm1356,yjm1383,yjm1387,yjm1415,yjm1417,yjm1433,yjm1477,yjm1478,yjm1526,yjm1527,yjm1549,yjm1574,yjm189,yjm193,yjm244,yjm248,yjm270,yjm271,yjm320,yjm326,yjm428,yjm450,yjm453,yjm555,yjm682,yjm693,yjm969,yjm972,yjm975,yjm978,yjm981,yjm984,yjm987,yjm990,yjm993,yjm996,
LTR_TY3 present in S288c	S288c	Chr16	856555	856885	38	S288c,yjm1078,yjm1129,yjm1242,yjm1244,yjm1332,yjm1336,yjm1341,yjm1356,yjm1387,yjm1415,yjm1417,yjm1433,yjm1477,yjm1526,yjm1527,yjm1574,yjm189,yjm193,yjm244,yjm248,yjm270,yjm271,yjm320,yjm326,yjm428,yjm453,yjm693,yjm969,yjm972,yjm975,yjm978,yjm981,yjm984,yjm987,yjm990,yjm993,yjm996,
LTR_TY3 present in S288c	S288c	Chr16	880386	880726	60	S288c,yjm1129,yjm1202,yjm1242,yjm1244,yjm1248,yjm1273,yjm1304,yjm1326,yjm1332,yjm1336,yjm1341,yjm1356,yjm1383,yjm1387,yjm1388,yjm1389,yjm1400,yjm1401,yjm1415,yjm1417,yjm1433,yjm1434,yjm1439,yjm1443,yjm1447,yjm1477,yjm1478,yjm1479,yjm1526,yjm1527,yjm1549,yjm1574,yjm1592,yjm189,yjm193,yjm195,yjm244,yjm248,yjm270,yjm271,yjm320,yjm326,yjm428,yjm453,yjm456,yjm555,yjm627,yjm682,yjm693,yjm969,yjm972,yjm…
	LTR_TY4 present in S288c	Chromosome	S288c coordinates start	S288c coordinates end		Strains,
LTR_TY4 present in S288c	S288c	Chr02	36221	35851	1	S288c,
LTR_TY4 present in S288c	S288c	Chr02	643858	643488	24	S288c,yjm1083,yjm1133,yjm1199,yjm1202,yjm1208,yjm1273,yjm1311,yjm1342,yjm1388,yjm1400,yjm1419,yjm1433,yjm1434,yjm1447,yjm1479,yjm1549,yjm1615,yjm320,yjm326,yjm428,yjm456,yjm470,yjm683,
LTR_TY4 present in S288c	S288c	Chr04	437149	437518	2	S288c,yjm1311,
LTR_TY4 present in S288c	S288c	Chr05	354730	354360	54	S288c,yjm1078,yjm1129,yjm1133,yjm1190,yjm1199,yjm1202,yjm1242,yjm1244,yjm1250,yjm1252,yjm1304,yjm1326,yjm1332,yjm1336,yjm1338,yjm1341,yjm1356,yjm1381,yjm1383,yjm1387,yjm1399,yjm1415,yjm1417,yjm1444,yjm1463,yjm1477,yjm1526,yjm1549,yjm1574,yjm1615,yjm189,yjm193,yjm244,yjm248,yjm270,yjm271,yjm428,yjm453,yjm681,yjm682,yjm683,yjm689,yjm693,yjm969,yjm972,yjm975,yjm978,yjm981,yjm984,yjm987,yjm990,yjm993…
LTR_TY4 present in S288c	S288c	Chr07	110855	111225	8	S288c,yjm1307,yjm1386,yjm1401,yjm1447,yjm1460,yjm1592,yjm450,
LTR_TY4 present in S288c	S288c	Chr07	931540	931171	1	S288c,
LTR_TY4 present in S288c	S288c	Chr08	85539	85909	4	S288c,yjm1307,yjm1401,yjm1419,
LTR_TY4 present in S288c	S288c	Chr08	91391	91761	3	S288c,yjm1307,yjm1418,
LTR_TY4 present in S288c	S288c	Chr09	197023	196653	12	S288c,yjm1083,yjm1307,yjm1388,yjm1389,yjm1400,yjm1447,yjm1450,yjm1460,yjm1479,yjm1592,yjm470,
LTR_TY4 present in S288c	S288c	Chr10	197545	197915	10	S288c,yjm1133,yjm1208,yjm1388,yjm1389,yjm1400,yjm1479,yjm456,yjm470,yjm682,
LTR_TY4 present in S288c	S288c	Chr10	203398	203768	2	S288c,yjm1389,
LTR_TY4 present in S288c	S288c	Chr13	503771	504141	27	S288c,yjm1199,yjm1208,yjm1273,yjm1307,yjm1338,yjm1342,yjm1383,yjm1388,yjm1389,yjm1400,yjm1402,yjm1433,yjm1434,yjm1460,yjm1463,yjm1479,yjm1573,yjm1592,yjm1615,yjm193,yjm271,yjm428,yjm451,yjm456,yjm470,yjm689,
LTR_TY4 present in S288c	S288c	Chr13	808906	808537	41	S288c,yjm1078,yjm1129,yjm1242,yjm1244,yjm1252,yjm1332,yjm1336,yjm1338,yjm1341,yjm1356,yjm1387,yjm1415,yjm1417,yjm1450,yjm1463,yjm1477,yjm1526,yjm1527,yjm1549,yjm1574,yjm189,yjm244,yjm248,yjm270,yjm320,yjm453,yjm456,yjm541,yjm627,yjm689,yjm693,yjm969,yjm972,yjm975,yjm978,yjm981,yjm987,yjm990,yjm993,yjm996,
LTR_TY4 present in S288c	S288c	Chr14	96451	96609	47	S288c,yjm1083,yjm1129,yjm1208,yjm1244,yjm1273,yjm1304,yjm1332,yjm1336,yjm1338,yjm1341,yjm1356,yjm1383,yjm1385,yjm1386,yjm1387,yjm1388,yjm1389,yjm1402,yjm1415,yjm1417,yjm1419,yjm1434,yjm1447,yjm1460,yjm1526,yjm1549,yjm1592,yjm1615,yjm189,yjm193,yjm195,yjm244,yjm270,yjm453,yjm456,yjm470,yjm555,yjm627,yjm972,yjm975,yjm978,yjm981,yjm987,yjm990,yjm993,yjm996,
LTR_TY4 present in S288c	S288c	Chr14	561607	561977	16	S288c,yjm1083,yjm1208,yjm1273,yjm1338,yjm1388,yjm1389,yjm1419,yjm1434,yjm1443,yjm1444,yjm1447,yjm1460,yjm1592,yjm1615,yjm470,
LTR_TY4 present in S288c	S288c	Chr14	632489	632119	56	S288c,yjm1083,yjm1129,yjm1133,yjm1208,yjm1244,yjm1273,yjm1304,yjm1311,yjm1332,yjm1336,yjm1338,yjm1341,yjm1342,yjm1355,yjm1356,yjm1383,yjm1385,yjm1386,yjm1387,yjm1388,yjm1389,yjm1402,yjm1415,yjm1417,yjm1419,yjm1434,yjm1444,yjm1460,yjm1463,yjm1526,yjm1527,yjm1549,yjm1573,yjm1574,yjm1592,yjm189,yjm195,yjm244,yjm270,yjm326,yjm450,yjm453,yjm470,yjm555,yjm627,yjm681,yjm689,yjm972,yjm975,yjm978,yjm981,y…
LTR_TY4 present in S288c	S288c	Chr16	437260	436890	1	S288c,
LTR_TY4 present in S288c	S288c	Chr16	443112	442742	1	S288c,
	LTR_TY5 present in S288c	Chromosome	S288c coordinates start	S288c coordinates end		Strains,
LTR_TY5 present in S288c	S288c	Chr03	4073	4322	53	S288c,yjm1078,yjm1129,yjm1202,yjm1208,yjm1242,yjm1244,yjm1252,yjm1307,yjm1332,yjm1336,yjm1341,yjm1355,yjm1356,yjm1381,yjm1383,yjm1385,yjm1386,yjm1387,yjm1400,yjm1415,yjm1417,yjm1418,yjm1450,yjm1477,yjm1526,yjm1527,yjm1574,yjm1615,yjm189,yjm244,yjm248,yjm270,yjm271,yjm428,yjm453,yjm456,yjm555,yjm627,yjm681,yjm682,yjm689,yjm693,yjm969,yjm972,yjm975,yjm978,yjm981,yjm984,yjm987,yjm990,yjm993,yjm996,
LTR_TY5 present in S288c	S288c	Chr03	291922	292167	94	S288c,yjm1078,yjm1083,yjm1129,yjm1133,yjm1190,yjm1199,yjm1202,yjm1208,yjm1242,yjm1244,yjm1248,yjm1250,yjm1252,yjm1273,yjm1304,yjm1307,yjm1311,yjm1326,yjm1332,yjm1336,yjm1338,yjm1341,yjm1342,yjm1355,yjm1356,yjm1381,yjm1383,yjm1385,yjm1386,yjm1387,yjm1388,yjm1389,yjm1399,yjm1400,yjm1401,yjm1402,yjm1415,yjm1417,yjm1418,yjm1419,yjm1433,yjm1434,yjm1439,yjm1443,yjm1444,yjm1447,yjm1450,yjm1460,yjm1463,y…
LTR_TY5 present in S288c	S288c	Chr05	566950	566700	42	S288c,yjm1078,yjm1083,yjm1208,yjm1248,yjm1252,yjm1273,yjm1307,yjm1338,yjm1342,yjm1355,yjm1383,yjm1386,yjm1388,yjm1389,yjm1399,yjm1400,yjm1401,yjm1402,yjm1418,yjm1419,yjm1434,yjm1439,yjm1443,yjm1447,yjm1450,yjm1460,yjm1463,yjm1479,yjm1573,yjm1592,yjm1615,yjm195,yjm270,yjm320,yjm428,yjm451,yjm456,yjm470,yjm681,yjm682,yjm683,
LTR_TY5 present in S288c	S288c	Chr07	895	1079	61	S288c,yjm1083,yjm1190,yjm1199,yjm1202,yjm1208,yjm1242,yjm1244,yjm1273,yjm1304,yjm1307,yjm1326,yjm1336,yjm1338,yjm1341,yjm1342,yjm1381,yjm1383,yjm1386,yjm1388,yjm1389,yjm1400,yjm1401,yjm1402,yjm1415,yjm1417,yjm1418,yjm1433,yjm1434,yjm1443,yjm1444,yjm1447,yjm1463,yjm1477,yjm1478,yjm1479,yjm1527,yjm1549,yjm1573,yjm1574,yjm1592,yjm1615,yjm189,yjm195,yjm270,yjm271,yjm428,yjm453,yjm456,yjm555,yjm681,yj…
LTR_TY5 present in S288c	S288c	Chr08	8225	7994	68	S288c,yjm1083,yjm1129,yjm1190,yjm1199,yjm1208,yjm1242,yjm1244,yjm1273,yjm1307,yjm1311,yjm1326,yjm1336,yjm1338,yjm1342,yjm1355,yjm1356,yjm1381,yjm1383,yjm1385,yjm1386,yjm1387,yjm1388,yjm1389,yjm1399,yjm1400,yjm1401,yjm1402,yjm1415,yjm1418,yjm1419,yjm1434,yjm1443,yjm1444,yjm1450,yjm1460,yjm1463,yjm1479,yjm1526,yjm1527,yjm1549,yjm1573,yjm1574,yjm1592,yjm1615,yjm189,yjm193,yjm195,yjm270,yjm271,yjm326…
LTR_TY5 present in S288c	S288c	Chr11	665430	665668	19	S288c,yjm1202,yjm1248,yjm1250,yjm1342,yjm1356,yjm1383,yjm1386,yjm1399,yjm1400,yjm1417,yjm1439,yjm1444,yjm1477,yjm195,yjm470,yjm627,yjm681,yjm984,

## Sheet: (B) NotiIn S288c
	LTR_TY1_2 not in S288c	Chromosome	coordinates in S288c	1	Strains,
LTR_TY1_2_ not in S288c	S288c	Chr01	5160	1	yjm1399,
LTR_TY1_2_ not in S288c	S288c	Chr01	6527	3	yjm1083,yjm1615,yjm326,
LTR_TY1_2_ not in S288c	S288c	Chr01	10565	1	yjm1399,
LTR_TY1_2_ not in S288c	S288c	Chr01	12357	1	yjm1400,
LTR_TY1_2_ not in S288c	S288c	Chr01	27978	2	yjm1400,yjm1479,
LTR_TY1_2_ not in S288c	S288c	Chr01	28853	2	yjm1400,yjm1479,
LTR_TY1_2_ not in S288c	S288c	Chr01	29414	6	yjm1083,yjm1615,yjm326,yjm450,yjm555,yjm682,
LTR_TY1_2_ not in S288c	S288c	Chr01	30306	1	yjm1385,
LTR_TY1_2_ not in S288c	S288c	Chr01	138363	1	yjm1208,
LTR_TY1_2_ not in S288c	S288c	Chr01	138397	4	yjm1385,yjm1388,yjm1400,yjm1479,
LTR_TY1_2_ not in S288c	S288c	Chr01	138439	1	yjm451,
LTR_TY1_2_ not in S288c	S288c	Chr01	138716	3	yjm1129,yjm1447,yjm326,
LTR_TY1_2_ not in S288c	S288c	Chr01	159883	7	yjm1202,yjm1248,yjm1342,yjm1439,yjm1527,yjm627,yjm689,
LTR_TY1_2_ not in S288c	S288c	Chr01	159916	8	yjm1190,yjm1355,yjm1389,yjm1418,yjm1450,yjm1549,yjm195,yjm450,
LTR_TY1_2_ not in S288c	S288c	Chr01	166111	3	yjm1388,yjm1389,yjm1592,
LTR_TY1_2_ not in S288c	S288c	Chr01	166165	3	yjm1248,yjm1342,yjm1439,
LTR_TY1_2_ not in S288c	S288c	Chr01	166253	3	yjm1311,yjm456,yjm681,
LTR_TY1_2_ not in S288c	S288c	Chr01	176833	1	yjm428,
LTR_TY1_2_ not in S288c	S288c	Chr01	180520	13	yjm1078,yjm1129,yjm1190,yjm1244,yjm1250,yjm1307,yjm1332,yjm1341,yjm1355,yjm270,yjm450,yjm987,yjm993,
LTR_TY1_2_ not in S288c	S288c	Chr01	180712	1	yjm1573,
LTR_TY1_2_ not in S288c	S288c	Chr01	180847	1	yjm1244,
LTR_TY1_2_ not in S288c	S288c	Chr01	180945	1	yjm1574,
LTR_TY1_2_ not in S288c	S288c	Chr01	181022	5	yjm1248,yjm1439,yjm1447,yjm195,yjm627,
LTR_TY1_2_ not in S288c	S288c	Chr01	181123	1	yjm1386,
LTR_TY1_2_ not in S288c	S288c	Chr01	181123	1	yjm681,
LTR_TY1_2_ not in S288c	S288c	Chr01	181433	2	yjm1385,yjm555,
LTR_TY1_2_ not in S288c	S288c	Chr01	181745	1	yjm1447,
LTR_TY1_2_ not in S288c	S288c	Chr01	182173	2	yjm1439,yjm248,
LTR_TY1_2_ not in S288c	S288c	Chr01	182392	3	yjm1248,yjm195,yjm627,
LTR_TY1_2_ not in S288c	S288c	Chr01	182440	2	yjm1401,yjm326,
LTR_TY1_2_ not in S288c	S288c	Chr01	182960	5	yjm1248,yjm1336,yjm1439,yjm1450,yjm627,
LTR_TY1_2_ not in S288c	S288c	Chr01	183717	1	yjm193,
LTR_TY1_2_ not in S288c	S288c	Chr01	186407	1	yjm1443,
LTR_TY1_2_ not in S288c	S288c	Chr01	189745	2	yjm1460,yjm470,
LTR_TY1_2_ not in S288c	S288c	Chr01	203197	1	yjm195,
LTR_TY1_2_ not in S288c	S288c	Chr02	7028	1	yjm1304,
LTR_TY1_2_ not in S288c	S288c	Chr02	7344	1	yjm1336,
LTR_TY1_2_ not in S288c	S288c	Chr02	7525	1	yjm271,
LTR_TY1_2_ not in S288c	S288c	Chr02	7576	1	yjm1250,
LTR_TY1_2_ not in S288c	S288c	Chr02	8437	1	yjm195,
LTR_TY1_2_ not in S288c	S288c	Chr02	8451	1	yjm1342,
LTR_TY1_2_ not in S288c	S288c	Chr02	8610	1	yjm1450,
LTR_TY1_2_ not in S288c	S288c	Chr02	8620	1	yjm1248,
LTR_TY1_2_ not in S288c	S288c	Chr02	8621	1	yjm1342,
LTR_TY1_2_ not in S288c	S288c	Chr02	8660	6	yjm1326,yjm1463,yjm541,yjm681,yjm682,yjm689,
LTR_TY1_2_ not in S288c	S288c	Chr02	8748	1	yjm1417,
LTR_TY1_2_ not in S288c	S288c	Chr02	9425	1	yjm1419,
LTR_TY1_2_ not in S288c	S288c	Chr02	9500	1	yjm451,
LTR_TY1_2_ not in S288c	S288c	Chr02	29129	3	yjm1400,yjm1479,yjm450,
LTR_TY1_2_ not in S288c	S288c	Chr02	29289	2	yjm1129,yjm1311,
LTR_TY1_2_ not in S288c	S288c	Chr02	29395	2	yjm1326,yjm1444,
LTR_TY1_2_ not in S288c	S288c	Chr02	35622	1	yjm195,
LTR_TY1_2_ not in S288c	S288c	Chr02	35656	1	yjm1385,
LTR_TY1_2_ not in S288c	S288c	Chr02	90178	1	yjm1208,
LTR_TY1_2_ not in S288c	S288c	Chr02	196856	5	yjm1248,yjm1387,yjm1439,yjm195,yjm627,
LTR_TY1_2_ not in S288c	S288c	Chr02	197043	2	yjm1129,yjm1444,
LTR_TY1_2_ not in S288c	S288c	Chr02	197083	7	yjm1078,yjm1083,yjm1208,yjm1304,yjm1307,yjm1460,yjm1615,
LTR_TY1_2_ not in S288c	S288c	Chr02	197136	7	yjm1248,yjm1402,yjm1439,yjm1444,yjm1573,yjm195,yjm627,
LTR_TY1_2_ not in S288c	S288c	Chr02	197384	4	yjm1208,yjm1307,yjm1460,yjm1615,
LTR_TY1_2_ not in S288c	S288c	Chr02	197504	1	yjm1478,
LTR_TY1_2_ not in S288c	S288c	Chr02	197521	4	yjm1242,yjm1336,yjm1477,yjm453,
LTR_TY1_2_ not in S288c	S288c	Chr02	197763	2	yjm1479,yjm450,
LTR_TY1_2_ not in S288c	S288c	Chr02	197877	2	yjm1381,yjm1444,
LTR_TY1_2_ not in S288c	S288c	Chr02	197982	2	yjm1574,yjm270,
LTR_TY1_2_ not in S288c	S288c	Chr02	198006	1	yjm1401,
LTR_TY1_2_ not in S288c	S288c	Chr02	198163	1	yjm456,
LTR_TY1_2_ not in S288c	S288c	Chr02	198291	1	yjm1401,
LTR_TY1_2_ not in S288c	S288c	Chr02	220661	2	yjm1355,yjm1443,
LTR_TY1_2_ not in S288c	S288c	Chr02	220680	1	yjm1202,
LTR_TY1_2_ not in S288c	S288c	Chr02	220725	2	yjm1199,yjm1443,
LTR_TY1_2_ not in S288c	S288c	Chr02	220788	12	yjm1133,yjm1190,yjm1248,yjm1273,yjm1326,yjm1402,yjm1434,yjm1439,yjm1573,yjm195,yjm541,yjm627,
LTR_TY1_2_ not in S288c	S288c	Chr02	222203	1	yjm450,
LTR_TY1_2_ not in S288c	S288c	Chr02	222357	1	yjm1389,
LTR_TY1_2_ not in S288c	S288c	Chr02	226953	2	yjm1199,yjm1355,
LTR_TY1_2_ not in S288c	S288c	Chr02	226973	4	yjm1133,yjm1326,yjm541,yjm627,
LTR_TY1_2_ not in S288c	S288c	Chr02	265757	1	yjm1342,
LTR_TY1_2_ not in S288c	S288c	Chr02	265935	1	yjm1478,
LTR_TY1_2_ not in S288c	S288c	Chr02	300165	1	yjm1418,
LTR_TY1_2_ not in S288c	S288c	Chr02	326935	1	yjm1418,
LTR_TY1_2_ not in S288c	S288c	Chr02	327030	1	yjm451,
LTR_TY1_2_ not in S288c	S288c	Chr02	327037	1	yjm1208,
LTR_TY1_2_ not in S288c	S288c	Chr02	327040	1	yjm456,
LTR_TY1_2_ not in S288c	S288c	Chr02	327140	1	yjm1615,
LTR_TY1_2_ not in S288c	S288c	Chr02	327152	3	yjm1338,yjm1385,yjm271,
LTR_TY1_2_ not in S288c	S288c	Chr02	327332	1	yjm1208,
LTR_TY1_2_ not in S288c	S288c	Chr02	327394	9	yjm1078,yjm1338,yjm1400,yjm1479,yjm1526,yjm1574,yjm450,yjm451,yjm456,
LTR_TY1_2_ not in S288c	S288c	Chr02	327574	1	yjm1342,
LTR_TY1_2_ not in S288c	S288c	Chr02	347215	1	yjm1443,
LTR_TY1_2_ not in S288c	S288c	Chr02	347267	1	yjm1549,
LTR_TY1_2_ not in S288c	S288c	Chr02	349935	5	yjm1248,yjm1381,yjm1439,yjm195,yjm627,
LTR_TY1_2_ not in S288c	S288c	Chr02	350255	1	yjm1208,
LTR_TY1_2_ not in S288c	S288c	Chr02	350409	1	yjm1419,
LTR_TY1_2_ not in S288c	S288c	Chr02	405257	17	yjm1133,yjm1208,yjm1304,yjm1311,yjm1342,yjm1381,yjm1401,yjm1447,yjm1615,yjm195,yjm320,yjm428,yjm541,yjm554,yjm555,yjm682,yjm683,
LTR_TY1_2_ not in S288c	S288c	Chr02	405365	5	yjm1199,yjm1202,yjm1355,yjm1399,yjm1450,
LTR_TY1_2_ not in S288c	S288c	Chr02	405496	3	yjm1304,yjm193,yjm555,
LTR_TY1_2_ not in S288c	S288c	Chr02	405763	1	yjm1311,
LTR_TY1_2_ not in S288c	S288c	Chr02	642857	5	yjm1311,yjm1389,yjm1444,yjm1460,yjm195,
LTR_TY1_2_ not in S288c	S288c	Chr02	643063	2	yjm1248,yjm1439,
LTR_TY1_2_ not in S288c	S288c	Chr02	643099	2	yjm1389,yjm1418,
LTR_TY1_2_ not in S288c	S288c	Chr02	643161	2	yjm1355,yjm450,
LTR_TY1_2_ not in S288c	S288c	Chr02	643170	1	yjm1385,
LTR_TY1_2_ not in S288c	S288c	Chr02	643182	1	yjm1478,
LTR_TY1_2_ not in S288c	S288c	Chr02	643277	1	yjm1418,
LTR_TY1_2_ not in S288c	S288c	Chr02	643308	1	yjm1338,
LTR_TY1_2_ not in S288c	S288c	Chr02	643323	4	yjm1252,yjm193,yjm248,yjm271,
LTR_TY1_2_ not in S288c	S288c	Chr14	643488	1	yjm1527,
LTR_TY1_2_ not in S288c	S288c	Chr02	643542	3	yjm1307,yjm1342,yjm1387,
LTR_TY1_2_ not in S288c	S288c	Chr02	643593	1	yjm1248,
LTR_TY1_2_ not in S288c	S288c	Chr02	643849	1	yjm1342,
LTR_TY1_2_ not in S288c	S288c	Chr02	643858	3	yjm1129,yjm1415,yjm1526,
LTR_TY1_2_ not in S288c	S288c	Chr02	644194	2	yjm1356,yjm1415,
LTR_TY1_2_ not in S288c	S288c	Chr02	644520	12	yjm1133,yjm1399,yjm1447,yjm1527,yjm453,yjm969,yjm972,yjm975,yjm978,yjm984,yjm987,yjm996,
LTR_TY1_2_ not in S288c	S288c	Chr02	644672	1	yjm1355,
LTR_TY1_2_ not in S288c	S288c	Chr02	644672	5	yjm1208,yjm1341,yjm1402,yjm1573,yjm693,
LTR_TY1_2_ not in S288c	S288c	Chr02	644723	5	yjm1248,yjm1250,yjm1273,yjm1434,yjm1439,
LTR_TY1_2_ not in S288c	S288c	Chr02	644844	1	yjm987,
LTR_TY1_2_ not in S288c	S288c	Chr02	644977	4	yjm1387,yjm1388,yjm1401,yjm1478,
LTR_TY1_2_ not in S288c	S288c	Chr02	645149	1	yjm1400,
LTR_TY1_2_ not in S288c	S288c	Chr02	744343	1	yjm682,
LTR_TY1_2_ not in S288c	S288c	Chr02	773487	1	yjm1133,
LTR_TY1_2_ not in S288c	S288c	Chr02	808569	2	yjm326,yjm683,
LTR_TY1_2_ not in S288c	S288c	Chr03	1753	1	yjm1527,
LTR_TY1_2_ not in S288c	S288c	Chr03	4550	1	yjm1388,
LTR_TY1_2_ not in S288c	S288c	Chr03	7431	7	yjm1332,yjm1478,yjm693,yjm969,yjm975,yjm987,yjm993,
LTR_TY1_2_ not in S288c	S288c	Chr03	14398	1	yjm1385,
LTR_TY1_2_ not in S288c	S288c	Chr03	39240	1	yjm1342,
LTR_TY1_2_ not in S288c	S288c	Chr03	75983	1	yjm1419,
LTR_TY1_2_ not in S288c	S288c	Chr03	82332	1	yjm248,
LTR_TY1_2_ not in S288c	S288c	Chr03	82342	1	yjm1439,
LTR_TY1_2_ not in S288c	S288c	Chr03	82455	10	yjm1252,yjm1332,yjm1381,yjm1383,yjm1419,yjm1615,yjm271,yjm451,yjm456,yjm689,
LTR_TY1_2_ not in S288c	S288c	Chr03	83037	1	yjm1478,
LTR_TY1_2_ not in S288c	S288c	Chr03	83196	42	yjm1083,yjm1248,yjm1307,yjm1311,yjm1332,yjm1338,yjm1342,yjm1381,yjm1383,yjm1386,yjm1387,yjm1400,yjm1401,yjm1402,yjm1418,yjm1419,yjm1433,yjm1439,yjm1443,yjm1444,yjm1450,yjm1463,yjm1478,yjm1479,yjm1527,yjm1549,yjm1615,yjm195,yjm248,yjm270,yjm271,yjm428,yjm451,yjm456,yjm541,yjm554,yjm682,yjm683,yjm689,yjm975,yjm981,yjm996,
LTR_TY1_2_ not in S288c	S288c	Chr03	83310	1	yjm1078,
LTR_TY1_2_ not in S288c	S288c	Chr03	83564	1	yjm270,
LTR_TY1_2_ not in S288c	S288c	Chr03	83710	6	yjm1311,yjm1388,yjm1389,yjm1443,yjm1460,yjm1592,
LTR_TY1_2_ not in S288c	S288c	Chr03	84632	1	yjm1342,
LTR_TY1_2_ not in S288c	S288c	Chr03	84632	3	yjm1400,yjm1434,yjm1479,
LTR_TY1_2_ not in S288c	S288c	Chr03	84778	1	yjm1400,
LTR_TY1_2_ not in S288c	S288c	Chr03	84961	1	yjm682,
LTR_TY1_2_ not in S288c	S288c	Chr03	87894	1	yjm451,
LTR_TY1_2_ not in S288c	S288c	Chr03	88017	1	yjm1401,
LTR_TY1_2_ not in S288c	S288c	Chr03	90770	6	yjm1383,yjm1419,yjm1479,yjm1615,yjm451,yjm456,
LTR_TY1_2_ not in S288c	S288c	Chr03	90770	23	yjm1078,yjm1083,yjm1133,yjm1208,yjm1244,yjm1250,yjm1307,yjm1341,yjm1355,yjm1385,yjm1386,yjm1399,yjm189,yjm244,yjm320,yjm453,yjm470,yjm541,yjm554,yjm693,yjm978,yjm990,yjm996,
LTR_TY1_2_ not in S288c	S288c	Chr03	124414	1	yjm682,
LTR_TY1_2_ not in S288c	S288c	Chr03	127224	2	yjm1381,yjm1399,
LTR_TY1_2_ not in S288c	S288c	Chr03	127352	1	yjm1342,
LTR_TY1_2_ not in S288c	S288c	Chr03	127702	7	yjm1304,yjm248,yjm320,yjm541,yjm554,yjm555,yjm689,
LTR_TY1_2_ not in S288c	S288c	Chr03	142606	5	yjm1342,yjm1355,yjm193,yjm270,yjm428,
LTR_TY1_2_ not in S288c	S288c	Chr03	142684	2	yjm1078,yjm1418,
LTR_TY1_2_ not in S288c	S288c	Chr03	142700	1	yjm1304,
LTR_TY1_2_ not in S288c	S288c	Chr03	142794	3	yjm1355,yjm1402,yjm1573,
LTR_TY1_2_ not in S288c	S288c	Chr03	142944	1	yjm1304,
LTR_TY1_2_ not in S288c	S288c	Chr03	143029	17	yjm1304,yjm1355,yjm1356,yjm1381,yjm1386,yjm1401,yjm1402,yjm1418,yjm1450,yjm1527,yjm1573,yjm193,yjm270,yjm428,yjm456,yjm682,yjm693,
LTR_TY1_2_ not in S288c	S288c	Chr03	143037	2	yjm1252,yjm1326,
LTR_TY1_2_ not in S288c	S288c	Chr03	143043	7	yjm1133,yjm1248,yjm1304,yjm1417,yjm244,yjm972,yjm993,
LTR_TY1_2_ not in S288c	S288c	Chr03	143081	1	yjm1307,
LTR_TY1_2_ not in S288c	S288c	Chr03	143081	2	yjm1439,yjm1460,
LTR_TY1_2_ not in S288c	S288c	Chr03	143324	1	yjm1342,
LTR_TY1_2_ not in S288c	S288c	Chr03	148849	1	yjm428,
LTR_TY1_2_ not in S288c	S288c	Chr03	149148	33	yjm1083,yjm1199,yjm1202,yjm1208,yjm1273,yjm1307,yjm1342,yjm1386,yjm1388,yjm1399,yjm1400,yjm1401,yjm1402,yjm1418,yjm1419,yjm1433,yjm1434,yjm1443,yjm1444,yjm1447,yjm1460,yjm1479,yjm1527,yjm1573,yjm1615,yjm193,yjm320,yjm450,yjm451,yjm470,yjm541,yjm554,yjm555,
LTR_TY1_2_ not in S288c	S288c	Chr03	149350	2	yjm1242,yjm1477,
LTR_TY1_2_ not in S288c	S288c	Chr03	149374	1	yjm1190,
LTR_TY1_2_ not in S288c	S288c	Chr03	149393	1	yjm1385,
LTR_TY1_2_ not in S288c	S288c	Chr03	149394	2	yjm1389,yjm1592,
LTR_TY1_2_ not in S288c	S288c	Chr03	149462	2	yjm1400,yjm1479,
LTR_TY1_2_ not in S288c	S288c	Chr03	149502	3	yjm1252,yjm1381,yjm693,
LTR_TY1_2_ not in S288c	S288c	Chr03	149530	1	yjm1342,
LTR_TY1_2_ not in S288c	S288c	Chr03	149580	3	yjm1389,yjm1447,yjm270,
LTR_TY1_2_ not in S288c	S288c	Chr03	149746	1	yjm1401,
LTR_TY1_2_ not in S288c	S288c	Chr03	149746	2	yjm1592,yjm456,
LTR_TY1_2_ not in S288c	S288c	Chr03	150034	1	yjm428,
LTR_TY1_2_ not in S288c	S288c	Chr03	151265	1	yjm681,
LTR_TY1_2_ not in S288c	S288c	Chr03	151596	3	yjm1402,yjm1527,yjm1573,
LTR_TY1_2_ not in S288c	S288c	Chr03	151661	2	yjm1248,yjm1439,
LTR_TY1_2_ not in S288c	S288c	Chr03	151784	33	yjm1078,yjm1083,yjm1133,yjm1252,yjm1304,yjm1307,yjm1326,yjm1355,yjm1356,yjm1385,yjm1386,yjm1388,yjm1401,yjm1417,yjm1419,yjm1443,yjm1463,yjm1615,yjm195,yjm244,yjm271,yjm428,yjm451,yjm453,yjm456,yjm541,yjm554,yjm555,yjm681,yjm682,yjm972,yjm975,yjm993,
LTR_TY1_2_ not in S288c	S288c	Chr03	168160	1	yjm1129,
LTR_TY1_2_ not in S288c	S288c	Chr03	168199	1	yjm1133,
LTR_TY1_2_ not in S288c	S288c	Chr03	168218	1	yjm195,
LTR_TY1_2_ not in S288c	S288c	Chr03	168292	2	yjm1526,yjm682,
LTR_TY1_2_ not in S288c	S288c	Chr03	168313	1	yjm1252,
LTR_TY1_2_ not in S288c	S288c	Chr03	168351	1	yjm683,
LTR_TY1_2_ not in S288c	S288c	Chr03	168610	1	yjm1419,
LTR_TY1_2_ not in S288c	S288c	Chr03	168901	1	yjm1478,
LTR_TY1_2_ not in S288c	S288c	Chr03	169068	1	yjm428,
LTR_TY1_2_ not in S288c	S288c	Chr03	169069	5	yjm1385,yjm1527,yjm320,yjm450,yjm456,
LTR_TY1_2_ not in S288c	S288c	Chr03	169243	1	yjm1478,
LTR_TY1_2_ not in S288c	S288c	Chr03	169362	1	yjm1386,
LTR_TY1_2_ not in S288c	S288c	Chr03	169369	1	yjm1478,
LTR_TY1_2_ not in S288c	S288c	Chr03	169524	1	yjm1478,
LTR_TY1_2_ not in S288c	S288c	Chr03	169545	2	yjm1400,yjm1479,
LTR_TY1_2_ not in S288c	S288c	Chr03	169666	1	yjm1129,
LTR_TY1_2_ not in S288c	S288c	Chr03	170777	1	yjm270,
LTR_TY1_2_ not in S288c	S288c	Chr03	173447	1	yjm1307,
LTR_TY1_2_ not in S288c	S288c	Chr03	225099	1	yjm1447,
LTR_TY1_2_ not in S288c	S288c	Chr03	227280	1	yjm1250,
LTR_TY1_2_ not in S288c	S288c	Chr03	227325	1	yjm1419,
LTR_TY1_2_ not in S288c	S288c	Chr03	227403	4	yjm1248,yjm1443,yjm1450,yjm627,
LTR_TY1_2_ not in S288c	S288c	Chr03	227566	6	yjm1307,yjm1401,yjm1419,yjm1478,yjm193,yjm271,
LTR_TY1_2_ not in S288c	S288c	Chr03	291599	1	yjm1447,
LTR_TY1_2_ not in S288c	S288c	Chr03	294633	3	yjm1388,yjm1389,yjm1592,
LTR_TY1_2_ not in S288c	S288c	Chr03	294791	1	yjm1083,
LTR_TY1_2_ not in S288c	S288c	Chr03	294901	13	yjm1190,yjm1199,yjm1202,yjm1244,yjm1311,yjm1356,yjm1385,yjm1444,yjm189,yjm193,yjm451,yjm453,yjm683,
LTR_TY1_2_ not in S288c	S288c	Chr03	295022	2	yjm1250,yjm1304,
LTR_TY1_2_ not in S288c	S288c	Chr03	295101	2	yjm1208,yjm1615,
LTR_TY1_2_ not in S288c	S288c	Chr03	295227	8	yjm1083,yjm1273,yjm1386,yjm1434,yjm1443,yjm1478,yjm1527,yjm456,
LTR_TY1_2_ not in S288c	S288c	Chr03	295227	2	yjm1419,yjm682,
LTR_TY1_2_ not in S288c	S288c	Chr03	295320	9	yjm1248,yjm1356,yjm1439,yjm1447,yjm1460,yjm320,yjm326,yjm554,yjm693,
LTR_TY1_2_ not in S288c	S288c	Chr03	295388	3	yjm1388,yjm1389,yjm1592,
LTR_TY1_2_ not in S288c	S288c	Chr03	295844	1	yjm1133,
LTR_TY1_2_ not in S288c	S288c	Chr03	295912	6	yjm1387,yjm1417,yjm1450,yjm428,yjm541,yjm689,
LTR_TY1_2_ not in S288c	S288c	Chr03	295947	2	yjm1574,yjm270,
LTR_TY1_2_ not in S288c	S288c	Chr03	296197	4	yjm1248,yjm1439,yjm682,yjm683,
LTR_TY1_2_ not in S288c	S288c	Chr03	299602	2	yjm1400,yjm1479,
LTR_TY1_2_ not in S288c	S288c	Chr03	305381	1	yjm1383,
LTR_TY1_2_ not in S288c	S288c	Chr03	307409	1	yjm554,
LTR_TY1_2_ not in S288c	S288c	Chr03	309915	1	yjm1083,
LTR_TY1_2_ not in S288c	S288c	Chr03	315937	1	yjm470,
LTR_TY1_2_ not in S288c	S288c	Chr04	16732	1	yjm1385,
LTR_TY1_2_ not in S288c	S288c	Chr04	19906	1	yjm244,
LTR_TY1_2_ not in S288c	S288c	Chr04	66184	2	yjm1199,yjm1202,
LTR_TY1_2_ not in S288c	S288c	Chr04	82369	2	yjm1401,yjm693,
LTR_TY1_2_ not in S288c	S288c	Chr04	82875	6	yjm1208,yjm1311,yjm1386,yjm193,yjm271,yjm428,
LTR_TY1_2_ not in S288c	S288c	Chr04	83140	20	yjm1190,yjm1199,yjm1202,yjm1244,yjm1250,yjm1336,yjm1355,yjm1356,yjm1383,yjm1385,yjm1387,yjm1415,yjm1526,yjm189,yjm244,yjm683,yjm972,yjm978,yjm990,yjm993,
LTR_TY1_2_ not in S288c	S288c	Chr04	83183	10	yjm1208,yjm1311,yjm1386,yjm428,yjm453,yjm969,yjm981,yjm984,yjm987,yjm996,
LTR_TY1_2_ not in S288c	S288c	Chr04	83414	2	yjm1338,yjm1527,
LTR_TY1_2_ not in S288c	S288c	Chr04	83425	2	yjm450,yjm975,
LTR_TY1_2_ not in S288c	S288c	Chr04	256316	1	yjm1078,
LTR_TY1_2_ not in S288c	S288c	Chr04	266895	1	yjm1381,
LTR_TY1_2_ not in S288c	S288c	Chr04	338004	1	yjm451,
LTR_TY1_2_ not in S288c	S288c	Chr04	358673	1	yjm1342,
LTR_TY1_2_ not in S288c	S288c	Chr04	359168	1	yjm453,
LTR_TY1_2_ not in S288c	S288c	Chr04	359578	2	yjm1244,yjm1386,
LTR_TY1_2_ not in S288c	S288c	Chr04	408070	2	yjm1342,yjm1418,
LTR_TY1_2_ not in S288c	S288c	Chr04	409921	2	yjm1385,yjm683,
LTR_TY1_2_ not in S288c	S288c	Chr04	434125	3	yjm1419,yjm1450,yjm1463,
LTR_TY1_2_ not in S288c	S288c	Chr04	434436	1	yjm1311,
LTR_TY1_2_ not in S288c	S288c	Chr04	434740	4	yjm1248,yjm1304,yjm1433,yjm1439,
LTR_TY1_2_ not in S288c	S288c	Chr04	434894	1	yjm456,
LTR_TY1_2_ not in S288c	S288c	Chr04	434894	1	yjm627,
LTR_TY1_2_ not in S288c	S288c	Chr04	434894	3	yjm1463,yjm682,yjm683,
LTR_TY1_2_ not in S288c	S288c	Chr04	434978	2	yjm1355,yjm1450,
LTR_TY1_2_ not in S288c	S288c	Chr04	435135	2	yjm1250,yjm451,
LTR_TY1_2_ not in S288c	S288c	Chr04	436076	2	yjm1549,yjm451,
LTR_TY1_2_ not in S288c	S288c	Chr04	436308	2	yjm1389,yjm1592,
LTR_TY1_2_ not in S288c	S288c	Chr04	436325	2	yjm1250,yjm195,
LTR_TY1_2_ not in S288c	S288c	Chr04	436825	6	yjm1248,yjm1399,yjm1401,yjm1439,yjm1447,yjm627,
LTR_TY1_2_ not in S288c	S288c	Chr04	436974	5	yjm1133,yjm1326,yjm326,yjm541,yjm554,
LTR_TY1_2_ not in S288c	S288c	Chr04	437519	5	yjm1273,yjm1385,yjm1400,yjm1434,yjm1479,
LTR_TY1_2_ not in S288c	S288c	Chr04	437519	1	yjm428,
LTR_TY1_2_ not in S288c	S288c	Chr04	437593	5	yjm1190,yjm1326,yjm1401,yjm1479,yjm450,
LTR_TY1_2_ not in S288c	S288c	Chr04	449233	1	yjm1355,
LTR_TY1_2_ not in S288c	S288c	Chr04	471852	3	yjm1338,yjm1383,yjm1388,
LTR_TY1_2_ not in S288c	S288c	Chr04	471871	1	yjm1342,
LTR_TY1_2_ not in S288c	S288c	Chr04	472531	2	yjm1383,yjm1388,
LTR_TY1_2_ not in S288c	S288c	Chr04	489204	1	yjm428,
LTR_TY1_2_ not in S288c	S288c	Chr04	513023	2	yjm1248,yjm195,
LTR_TY1_2_ not in S288c	S288c	Chr04	513041	1	yjm1389,
LTR_TY1_2_ not in S288c	S288c	Chr04	513046	1	yjm627,
LTR_TY1_2_ not in S288c	S288c	Chr04	513136	1	yjm450,
LTR_TY1_2_ not in S288c	S288c	Chr04	513288	1	yjm1242,
LTR_TY1_2_ not in S288c	S288c	Chr04	513314	49	yjm1078,yjm1083,yjm1129,yjm1190,yjm1199,yjm1208,yjm1242,yjm1244,yjm1250,yjm1307,yjm1332,yjm1336,yjm1341,yjm1355,yjm1356,yjm1381,yjm1385,yjm1386,yjm1387,yjm1415,yjm1417,yjm1477,yjm1478,yjm1526,yjm1549,yjm1574,yjm1615,yjm189,yjm193,yjm244,yjm270,yjm271,yjm326,yjm428,yjm451,yjm453,yjm681,yjm689,yjm693,yjm969,yjm972,yjm975,yjm978,yjm981,yjm984,yjm987,yjm990,yjm993,yjm996,
LTR_TY1_2_ not in S288c	S288c	Chr04	513319	7	yjm1190,yjm1326,yjm1332,yjm1477,yjm428,yjm450,yjm975,
LTR_TY1_2_ not in S288c	S288c	Chr04	514020	50	yjm1078,yjm1083,yjm1129,yjm1190,yjm1199,yjm1208,yjm1242,yjm1244,yjm1250,yjm1307,yjm1326,yjm1332,yjm1336,yjm1341,yjm1355,yjm1356,yjm1381,yjm1385,yjm1386,yjm1387,yjm1415,yjm1417,yjm1477,yjm1478,yjm1526,yjm1549,yjm1574,yjm1615,yjm189,yjm193,yjm244,yjm270,yjm271,yjm326,yjm428,yjm451,yjm453,yjm681,yjm689,yjm693,yjm969,yjm972,yjm975,yjm978,yjm981,yjm984,yjm987,yjm990,yjm993,yjm996,
LTR_TY1_2_ not in S288c	S288c	Chr04	514020	1	yjm1342,
LTR_TY1_2_ not in S288c	S288c	Chr04	519645	2	yjm1311,yjm1383,
LTR_TY1_2_ not in S288c	S288c	Chr04	519645	3	yjm1400,yjm1447,yjm1479,
LTR_TY1_2_ not in S288c	S288c	Chr04	519645	3	yjm1311,yjm1592,yjm450,
LTR_TY1_2_ not in S288c	S288c	Chr04	519865	34	yjm1133,yjm1202,yjm1248,yjm1273,yjm1338,yjm1342,yjm1388,yjm1389,yjm1399,yjm1400,yjm1402,yjm1418,yjm1419,yjm1433,yjm1434,yjm1439,yjm1443,yjm1444,yjm1450,yjm1460,yjm1479,yjm1527,yjm1573,yjm1592,yjm195,yjm320,yjm456,yjm470,yjm541,yjm554,yjm555,yjm627,yjm682,yjm683,
LTR_TY1_2_ not in S288c	S288c	Chr04	520099	3	yjm1202,yjm1311,yjm1326,
LTR_TY1_2_ not in S288c	S288c	Chr04	520232	2	yjm1400,yjm1479,
LTR_TY1_2_ not in S288c	S288c	Chr04	520805	6	yjm1252,yjm1304,yjm1400,yjm1401,yjm1463,yjm248,
LTR_TY1_2_ not in S288c	S288c	Chr04	527531	1	yjm326,
LTR_TY1_2_ not in S288c	S288c	Chr04	570102	5	yjm1304,yjm1433,yjm1450,yjm450,yjm693,
LTR_TY1_2_ not in S288c	S288c	Chr04	619848	2	yjm1460,yjm248,
LTR_TY1_2_ not in S288c	S288c	Chr04	619919	10	yjm1133,yjm1439,yjm1447,yjm195,yjm320,yjm541,yjm554,yjm555,yjm627,yjm689,
LTR_TY1_2_ not in S288c	S288c	Chr04	619948	4	yjm1199,yjm1202,yjm1326,yjm681,
LTR_TY1_2_ not in S288c	S288c	Chr04	620159	1	yjm1248,
LTR_TY1_2_ not in S288c	S288c	Chr04	620235	1	yjm450,
LTR_TY1_2_ not in S288c	S288c	Chr04	644632	1	yjm470,
LTR_TY1_2_ not in S288c	S288c	Chr04	645046	8	yjm1199,yjm1202,yjm1307,yjm1439,yjm1478,yjm195,yjm271,yjm627,
LTR_TY1_2_ not in S288c	S288c	Chr04	645125	8	yjm1250,yjm1304,yjm1385,yjm1399,yjm326,yjm682,yjm683,yjm693,
LTR_TY1_2_ not in S288c	S288c	Chr04	645205	2	yjm1129,yjm1526,
LTR_TY1_2_ not in S288c	S288c	Chr04	645304	2	yjm1208,yjm270,
LTR_TY1_2_ not in S288c	S288c	Chr04	645463	1	yjm689,
LTR_TY1_2_ not in S288c	S288c	Chr04	651621	3	yjm1342,yjm193,yjm470,
LTR_TY1_2_ not in S288c	S288c	Chr04	651862	5	yjm1248,yjm1433,yjm1439,yjm195,yjm627,
LTR_TY1_2_ not in S288c	S288c	Chr04	652008	2	yjm1402,yjm1573,
LTR_TY1_2_ not in S288c	S288c	Chr04	667867	2	yjm1208,yjm1250,
LTR_TY1_2_ not in S288c	S288c	Chr04	667922	1	yjm1418,
LTR_TY1_2_ not in S288c	S288c	Chr04	667956	3	yjm1078,yjm1400,yjm1479,
LTR_TY1_2_ not in S288c	S288c	Chr04	668011	1	yjm1311,
LTR_TY1_2_ not in S288c	S288c	Chr04	668437	1	yjm1326,
LTR_TY1_2_ not in S288c	S288c	Chr04	668437	1	yjm1342,
LTR_TY1_2_ not in S288c	S288c	Chr04	668588	1	yjm1400,
LTR_TY1_2_ not in S288c	S288c	Chr04	757596	1	yjm1439,
LTR_TY1_2_ not in S288c	S288c	Chr04	758879	1	yjm1252,
LTR_TY1_2_ not in S288c	S288c	Chr04	759167	2	yjm1248,yjm1252,
LTR_TY1_2_ not in S288c	S288c	Chr04	759174	1	yjm1248,
LTR_TY1_2_ not in S288c	S288c	Chr04	784358	1	yjm1250,
LTR_TY1_2_ not in S288c	S288c	Chr04	802615	41	yjm1083,yjm1133,yjm1199,yjm1202,yjm1208,yjm1248,yjm1273,yjm1307,yjm1311,yjm1326,yjm1338,yjm1342,yjm1355,yjm1381,yjm1385,yjm1388,yjm1389,yjm1399,yjm1400,yjm1401,yjm1402,yjm1418,yjm1434,yjm1439,yjm1443,yjm1444,yjm1447,yjm1460,yjm1479,yjm1527,yjm1573,yjm1574,yjm1592,yjm1615,yjm195,yjm428,yjm450,yjm451,yjm470,yjm627,yjm689,
LTR_TY1_2_ not in S288c	S288c	Chr04	802685	2	yjm1244,yjm1387,
LTR_TY1_2_ not in S288c	S288c	Chr04	803053	1	yjm1386,
LTR_TY1_2_ not in S288c	S288c	Chr04	803064	1	yjm555,
LTR_TY1_2_ not in S288c	S288c	Chr04	803235	3	yjm1244,yjm1387,yjm193,
LTR_TY1_2_ not in S288c	S288c	Chr04	803583	1	yjm1401,
LTR_TY1_2_ not in S288c	S288c	Chr04	803622	4	yjm1083,yjm428,yjm451,yjm682,
LTR_TY1_2_ not in S288c	S288c	Chr04	804099	1	yjm1208,
LTR_TY1_2_ not in S288c	S288c	Chr04	804099	1	yjm1615,
LTR_TY1_2_ not in S288c	S288c	Chr04	804143	6	yjm1248,yjm1419,yjm1439,yjm326,yjm682,yjm683,
LTR_TY1_2_ not in S288c	S288c	Chr04	804426	5	yjm1389,yjm1460,yjm271,yjm555,yjm627,
LTR_TY1_2_ not in S288c	S288c	Chr04	871449	88	yjm1078,yjm1083,yjm1129,yjm1133,yjm1190,yjm1199,yjm1202,yjm1208,yjm1242,yjm1244,yjm1250,yjm1252,yjm1273,yjm1304,yjm1307,yjm1311,yjm1326,yjm1332,yjm1336,yjm1338,yjm1341,yjm1342,yjm1356,yjm1381,yjm1386,yjm1387,yjm1388,yjm1389,yjm1399,yjm1400,yjm1401,yjm1402,yjm1415,yjm1417,yjm1418,yjm1419,yjm1434,yjm1439,yjm1443,yjm1444,yjm1447,yjm1450,yjm1460,yjm1463,yjm1477,yjm1478,yjm1479,yjm1526,yjm1527,yjm1549…
LTR_TY1_2_ not in S288c	S288c	Chr04	871627	2	yjm326,yjm555,
LTR_TY1_2_ not in S288c	S288c	Chr04	871632	1	yjm1399,
LTR_TY1_2_ not in S288c	S288c	Chr04	871857	1	yjm1383,
LTR_TY1_2_ not in S288c	S288c	Chr04	877623	10	yjm1250,yjm326,yjm972,yjm975,yjm978,yjm981,yjm987,yjm990,yjm993,yjm996,
LTR_TY1_2_ not in S288c	S288c	Chr04	877928	3	yjm1402,yjm1573,yjm1592,
LTR_TY1_2_ not in S288c	S288c	Chr04	883923	2	yjm1439,yjm627,
LTR_TY1_2_ not in S288c	S288c	Chr04	945105	8	yjm1383,yjm1400,yjm1401,yjm1479,yjm320,yjm541,yjm554,yjm683,
LTR_TY1_2_ not in S288c	S288c	Chr04	945491	4	yjm1399,yjm326,yjm555,yjm682,
LTR_TY1_2_ not in S288c	S288c	Chr04	945834	1	yjm1419,
LTR_TY1_2_ not in S288c	S288c	Chr04	945974	1	yjm1356,
LTR_TY1_2_ not in S288c	S288c	Chr04	946224	1	yjm1250,
LTR_TY1_2_ not in S288c	S288c	Chr04	946224	1	yjm1450,
LTR_TY1_2_ not in S288c	S288c	Chr04	946296	1	yjm1549,
LTR_TY1_2_ not in S288c	S288c	Chr04	946397	2	yjm1304,yjm1326,
LTR_TY1_2_ not in S288c	S288c	Chr04	946562	1	yjm1304,
LTR_TY1_2_ not in S288c	S288c	Chr04	980858	5	yjm1250,yjm1311,yjm1419,yjm1526,yjm244,
LTR_TY1_2_ not in S288c	S288c	Chr04	980893	51	yjm1083,yjm1199,yjm1202,yjm1208,yjm1242,yjm1273,yjm1304,yjm1307,yjm1326,yjm1332,yjm1336,yjm1342,yjm1383,yjm1385,yjm1386,yjm1387,yjm1402,yjm1418,yjm1434,yjm1443,yjm1444,yjm1447,yjm1450,yjm1460,yjm1477,yjm1527,yjm1549,yjm1573,yjm1615,yjm189,yjm270,yjm320,yjm428,yjm451,yjm456,yjm470,yjm541,yjm554,yjm681,yjm689,yjm693,yjm969,yjm972,yjm975,yjm978,yjm981,yjm984,yjm987,yjm990,yjm993,yjm996,
LTR_TY1_2_ not in S288c	S288c	Chr04	980897	1	yjm1478,
LTR_TY1_2_ not in S288c	S288c	Chr04	980921	3	yjm1388,yjm1389,yjm1592,
LTR_TY1_2_ not in S288c	S288c	Chr04	980941	1	yjm682,
LTR_TY1_2_ not in S288c	S288c	Chr04	980953	1	yjm1355,
LTR_TY1_2_ not in S288c	S288c	Chr04	980959	4	yjm1356,yjm1417,yjm193,yjm271,
LTR_TY1_2_ not in S288c	S288c	Chr04	980972	4	yjm1248,yjm1415,yjm1439,yjm627,
LTR_TY1_2_ not in S288c	S288c	Chr04	980993	3	yjm1199,yjm1202,yjm320,
LTR_TY1_2_ not in S288c	S288c	Chr04	981001	2	yjm1338,yjm450,
LTR_TY1_2_ not in S288c	S288c	Chr04	981039	2	yjm1399,yjm1433,
LTR_TY1_2_ not in S288c	S288c	Chr04	981232	2	yjm1381,yjm1574,
LTR_TY1_2_ not in S288c	S288c	Chr04	981944	1	yjm270,
LTR_TY1_2_ not in S288c	S288c	Chr04	984237	1	yjm1342,
LTR_TY1_2_ not in S288c	S288c	Chr04	986843	3	yjm1078,yjm1208,yjm1341,
LTR_TY1_2_ not in S288c	S288c	Chr04	992345	1	yjm1248,
LTR_TY1_2_ not in S288c	S288c	Chr04	992479	1	yjm1133,
LTR_TY1_2_ not in S288c	S288c	Chr04	992566	1	yjm1526,
LTR_TY1_2_ not in S288c	S288c	Chr04	992604	4	yjm1208,yjm1326,yjm1338,yjm1418,
LTR_TY1_2_ not in S288c	S288c	Chr04	992708	1	yjm1463,
LTR_TY1_2_ not in S288c	S288c	Chr04	995399	1	yjm1252,
LTR_TY1_2_ not in S288c	S288c	Chr04	1017097	1	yjm1418,
LTR_TY1_2_ not in S288c	S288c	Chr04	1017114	8	yjm1304,yjm1381,yjm1383,yjm1385,yjm193,yjm271,yjm470,yjm693,
LTR_TY1_2_ not in S288c	S288c	Chr04	1017159	1	yjm1401,
LTR_TY1_2_ not in S288c	S288c	Chr04	1017163	4	yjm1129,yjm1355,yjm1399,yjm1447,
LTR_TY1_2_ not in S288c	S288c	Chr04	1017453	2	yjm1078,yjm1419,
LTR_TY1_2_ not in S288c	S288c	Chr04	1017548	4	yjm1400,yjm1479,yjm451,yjm555,
LTR_TY1_2_ not in S288c	S288c	Chr04	1022736	1	yjm1386,
LTR_TY1_2_ not in S288c	S288c	Chr04	1075335	1	yjm1304,
LTR_TY1_2_ not in S288c	S288c	Chr04	1084583	1	yjm1208,
LTR_TY1_2_ not in S288c	S288c	Chr04	1095501	1	yjm1248,
LTR_TY1_2_ not in S288c	S288c	Chr04	1095850	1	yjm1450,
LTR_TY1_2_ not in S288c	S288c	Chr04	1095900	2	yjm1244,yjm453,
LTR_TY1_2_ not in S288c	S288c	Chr04	1095940	1	yjm693,
LTR_TY1_2_ not in S288c	S288c	Chr04	1096087	1	yjm1399,
LTR_TY1_2_ not in S288c	S288c	Chr04	1101517	1	yjm689,
LTR_TY1_2_ not in S288c	S288c	Chr04	1101713	1	yjm689,
LTR_TY1_2_ not in S288c	S288c	Chr04	1101873	2	yjm1273,yjm1434,
LTR_TY1_2_ not in S288c	S288c	Chr04	1150430	1	yjm1419,
LTR_TY1_2_ not in S288c	S288c	Chr04	1150473	1	yjm1450,
LTR_TY1_2_ not in S288c	S288c	Chr04	1150766	1	yjm1418,
LTR_TY1_2_ not in S288c	S288c	Chr04	1150800	1	yjm270,
LTR_TY1_2_ not in S288c	S288c	Chr04	1150837	8	yjm1248,yjm1439,yjm1447,yjm1549,yjm193,yjm271,yjm627,yjm689,
LTR_TY1_2_ not in S288c	S288c	Chr04	1150969	2	yjm1399,yjm195,
LTR_TY1_2_ not in S288c	S288c	Chr04	1151065	2	yjm1248,yjm428,
LTR_TY1_2_ not in S288c	S288c	Chr04	1151175	1	yjm1527,
LTR_TY1_2_ not in S288c	S288c	Chr04	1151368	3	yjm1244,yjm1450,yjm270,
LTR_TY1_2_ not in S288c	S288c	Chr04	1151624	6	yjm1248,yjm1418,yjm1439,yjm1549,yjm195,yjm627,
LTR_TY1_2_ not in S288c	S288c	Chr04	1154152	1	yjm1252,
LTR_TY1_2_ not in S288c	S288c	Chr04	1154285	1	yjm244,
LTR_TY1_2_ not in S288c	S288c	Chr04	1154673	1	yjm1527,
LTR_TY1_2_ not in S288c	S288c	Chr04	1155423	1	yjm1252,
LTR_TY1_2_ not in S288c	S288c	Chr04	1174685	3	yjm1399,yjm1463,yjm451,
LTR_TY1_2_ not in S288c	S288c	Chr04	1174735	1	yjm1250,
LTR_TY1_2_ not in S288c	S288c	Chr04	1175099	1	yjm195,
LTR_TY1_2_ not in S288c	S288c	Chr04	1175100	13	yjm1208,yjm1244,yjm1248,yjm1307,yjm1387,yjm1388,yjm1389,yjm1439,yjm1592,yjm453,yjm627,yjm681,yjm975,
LTR_TY1_2_ not in S288c	S288c	Chr04	1175837	1	yjm270,
LTR_TY1_2_ not in S288c	S288c	Chr04	1201162	2	yjm1244,yjm1385,
LTR_TY1_2_ not in S288c	S288c	Chr04	1256893	3	yjm1083,yjm1450,yjm248,
LTR_TY1_2_ not in S288c	S288c	Chr04	1256977	1	yjm1250,
LTR_TY1_2_ not in S288c	S288c	Chr04	1256995	3	yjm1078,yjm1083,yjm1399,
LTR_TY1_2_ not in S288c	S288c	Chr04	1304933	3	yjm1129,yjm1402,yjm1526,
LTR_TY1_2_ not in S288c	S288c	Chr04	1305213	1	yjm189,
LTR_TY1_2_ not in S288c	S288c	Chr04	1307587	1	yjm1386,
LTR_TY1_2_ not in S288c	S288c	Chr04	1307725	1	yjm1386,
LTR_TY1_2_ not in S288c	S288c	Chr04	1352358	2	yjm1250,yjm1573,
LTR_TY1_2_ not in S288c	S288c	Chr04	1352410	4	yjm1402,yjm326,yjm682,yjm683,
LTR_TY1_2_ not in S288c	S288c	Chr04	1352976	1	yjm1078,
LTR_TY1_2_ not in S288c	S288c	Chr04	1352976	3	yjm326,yjm681,yjm682,
LTR_TY1_2_ not in S288c	S288c	Chr04	1352979	1	yjm1252,
LTR_TY1_2_ not in S288c	S288c	Chr04	1353066	2	yjm1402,yjm1573,
LTR_TY1_2_ not in S288c	S288c	Chr04	1353658	1	yjm681,
LTR_TY1_2_ not in S288c	S288c	Chr04	1394526	3	yjm326,yjm682,yjm683,
LTR_TY1_2_ not in S288c	S288c	Chr04	1446973	2	yjm1129,yjm1526,
LTR_TY1_2_ not in S288c	S288c	Chr04	1461623	3	yjm1433,yjm1574,yjm470,
LTR_TY1_2_ not in S288c	S288c	Chr04	1461680	3	yjm1342,yjm1478,yjm1549,
LTR_TY1_2_ not in S288c	S288c	Chr04	1461699	3	yjm1355,yjm1399,yjm689,
LTR_TY1_2_ not in S288c	S288c	Chr04	1461917	1	yjm1083,
LTR_TY1_2_ not in S288c	S288c	Chr04	1461917	4	yjm1385,yjm1433,yjm450,yjm693,
LTR_TY1_2_ not in S288c	S288c	Chr04	1461962	1	yjm1252,
LTR_TY1_2_ not in S288c	S288c	Chr04	1462007	1	yjm1342,
LTR_TY1_2_ not in S288c	S288c	Chr05	11035	2	yjm1400,yjm1479,
LTR_TY1_2_ not in S288c	S288c	Chr05	62475	1	yjm1433,
LTR_TY1_2_ not in S288c	S288c	Chr05	62933	3	yjm1311,yjm1400,yjm1479,
LTR_TY1_2_ not in S288c	S288c	Chr05	79247	2	yjm1307,yjm1478,
LTR_TY1_2_ not in S288c	S288c	Chr05	99753	1	yjm689,
LTR_TY1_2_ not in S288c	S288c	Chr05	99971	2	yjm1400,yjm1479,
LTR_TY1_2_ not in S288c	S288c	Chr05	117969	4	yjm1389,yjm1447,yjm1463,yjm689,
LTR_TY1_2_ not in S288c	S288c	Chr05	118003	1	yjm1336,
LTR_TY1_2_ not in S288c	S288c	Chr05	118004	1	yjm1433,
LTR_TY1_2_ not in S288c	S288c	Chr05	118025	2	yjm1304,yjm1450,
LTR_TY1_2_ not in S288c	S288c	Chr05	118045	2	yjm195,yjm470,
LTR_TY1_2_ not in S288c	S288c	Chr05	118100	1	yjm1190,
LTR_TY1_2_ not in S288c	S288c	Chr05	118221	6	yjm1248,yjm1389,yjm1399,yjm1439,yjm1592,yjm195,
LTR_TY1_2_ not in S288c	S288c	Chr05	118320	2	yjm1190,yjm1304,
LTR_TY1_2_ not in S288c	S288c	Chr05	130863	2	yjm541,yjm554,
LTR_TY1_2_ not in S288c	S288c	Chr05	131195	2	yjm1419,yjm1433,
LTR_TY1_2_ not in S288c	S288c	Chr05	135386	1	yjm1433,
LTR_TY1_2_ not in S288c	S288c	Chr05	135395	1	yjm1250,
LTR_TY1_2_ not in S288c	S288c	Chr05	135940	2	yjm1400,yjm689,
LTR_TY1_2_ not in S288c	S288c	Chr05	135962	1	yjm1447,
LTR_TY1_2_ not in S288c	S288c	Chr05	135962	1	yjm1479,
LTR_TY1_2_ not in S288c	S288c	Chr05	136071	1	yjm693,
LTR_TY1_2_ not in S288c	S288c	Chr05	136368	1	yjm1383,
LTR_TY1_2_ not in S288c	S288c	Chr05	136548	1	yjm1444,
LTR_TY1_2_ not in S288c	S288c	Chr05	138078	4	yjm1078,yjm1252,yjm1419,yjm248,
LTR_TY1_2_ not in S288c	S288c	Chr05	138445	1	yjm1418,
LTR_TY1_2_ not in S288c	S288c	Chr05	138473	1	yjm693,
LTR_TY1_2_ not in S288c	S288c	Chr05	138474	27	yjm1078,yjm1083,yjm1208,yjm1248,yjm1252,yjm1273,yjm1307,yjm1381,yjm1383,yjm1386,yjm1388,yjm1389,yjm1399,yjm1400,yjm1401,yjm1402,yjm1434,yjm1439,yjm1444,yjm1447,yjm1479,yjm1573,yjm1592,yjm1615,yjm189,yjm248,yjm984,
LTR_TY1_2_ not in S288c	S288c	Chr05	138654	1	yjm195,
LTR_TY1_2_ not in S288c	S288c	Chr05	176138	1	yjm1190,
LTR_TY1_2_ not in S288c	S288c	Chr05	176483	1	yjm1463,
LTR_TY1_2_ not in S288c	S288c	Chr05	176723	1	yjm1574,
LTR_TY1_2_ not in S288c	S288c	Chr05	177023	4	yjm1083,yjm1307,yjm193,yjm271,
LTR_TY1_2_ not in S288c	S288c	Chr05	177258	4	yjm1248,yjm1439,yjm195,yjm627,
LTR_TY1_2_ not in S288c	S288c	Chr05	177514	1	yjm1307,
LTR_TY1_2_ not in S288c	S288c	Chr05	206861	2	yjm1199,yjm1202,
LTR_TY1_2_ not in S288c	S288c	Chr05	206903	6	yjm1248,yjm1307,yjm1439,yjm195,yjm450,yjm627,
LTR_TY1_2_ not in S288c	S288c	Chr05	249167	1	yjm470,
LTR_TY1_2_ not in S288c	S288c	Chr05	249479	3	yjm1311,yjm1338,yjm456,
LTR_TY1_2_ not in S288c	S288c	Chr05	249524	3	yjm1199,yjm1202,yjm1342,
LTR_TY1_2_ not in S288c	S288c	Chr05	250397	1	yjm1385,
LTR_TY1_2_ not in S288c	S288c	Chr05	288453	2	yjm193,yjm271,
LTR_TY1_2_ not in S288c	S288c	Chr05	288733	1	yjm1356,
LTR_TY1_2_ not in S288c	S288c	Chr05	311936	1	yjm428,
LTR_TY1_2_ not in S288c	S288c	Chr05	312143	1	yjm244,
LTR_TY1_2_ not in S288c	S288c	Chr05	312197	2	yjm1248,yjm1439,
LTR_TY1_2_ not in S288c	S288c	Chr05	312392	35	yjm1078,yjm1083,yjm1208,yjm1248,yjm1252,yjm1273,yjm1307,yjm1381,yjm1383,yjm1388,yjm1389,yjm1399,yjm1400,yjm1401,yjm1418,yjm1434,yjm1439,yjm1444,yjm1447,yjm1479,yjm1592,yjm1615,yjm189,yjm195,yjm248,yjm627,yjm969,yjm972,yjm978,yjm981,yjm984,yjm987,yjm990,yjm993,yjm996,
LTR_TY1_2_ not in S288c	S288c	Chr05	353779	6	yjm1248,yjm1386,yjm1439,yjm1443,yjm451,yjm627,
LTR_TY1_2_ not in S288c	S288c	Chr05	354207	1	yjm1385,
LTR_TY1_2_ not in S288c	S288c	Chr05	354385	1	yjm1478,
LTR_TY1_2_ not in S288c	S288c	Chr05	431221	6	yjm1242,yjm1385,yjm1477,yjm1478,yjm271,yjm451,
LTR_TY1_2_ not in S288c	S288c	Chr05	431485	1	yjm451,
LTR_TY1_2_ not in S288c	S288c	Chr05	431485	1	yjm689,
LTR_TY1_2_ not in S288c	S288c	Chr05	431771	4	yjm1248,yjm1439,yjm195,yjm326,
LTR_TY1_2_ not in S288c	S288c	Chr05	431823	10	yjm1252,yjm1307,yjm1326,yjm1336,yjm1356,yjm1385,yjm1399,yjm1478,yjm453,yjm456,
LTR_TY1_2_ not in S288c	S288c	Chr05	432222	1	yjm1388,
LTR_TY1_2_ not in S288c	S288c	Chr05	434450	4	yjm1400,yjm1479,yjm270,yjm271,
LTR_TY1_2_ not in S288c	S288c	Chr05	434564	21	yjm1129,yjm1133,yjm1199,yjm1202,yjm1248,yjm1273,yjm1304,yjm1399,yjm1417,yjm1439,yjm1460,yjm1479,yjm1549,yjm1574,yjm450,yjm451,yjm470,yjm541,yjm554,yjm555,yjm693,
LTR_TY1_2_ not in S288c	S288c	Chr05	434972	3	yjm1338,yjm1443,yjm456,
LTR_TY1_2_ not in S288c	S288c	Chr05	435060	2	yjm1190,yjm320,
LTR_TY1_2_ not in S288c	S288c	Chr05	435214	10	yjm1083,yjm1190,yjm1208,yjm1304,yjm1549,yjm195,yjm320,yjm326,yjm555,yjm689,
LTR_TY1_2_ not in S288c	S288c	Chr05	435639	1	yjm193,
LTR_TY1_2_ not in S288c	S288c	Chr05	435680	1	yjm1419,
LTR_TY1_2_ not in S288c	S288c	Chr05	435703	1	yjm1615,
LTR_TY1_2_ not in S288c	S288c	Chr05	435729	20	yjm1133,yjm1190,yjm1199,yjm1202,yjm1304,yjm1326,yjm1342,yjm1355,yjm1450,yjm1460,yjm1574,yjm320,yjm326,yjm428,yjm450,yjm541,yjm554,yjm555,yjm689,yjm693,
LTR_TY1_2_ not in S288c	S288c	Chr05	436039	2	yjm1242,yjm1415,
LTR_TY1_2_ not in S288c	S288c	Chr05	436226	5	yjm1252,yjm1326,yjm1355,yjm189,yjm248,
LTR_TY1_2_ not in S288c	S288c	Chr05	436278	1	yjm1307,
LTR_TY1_2_ not in S288c	S288c	Chr05	436278	2	yjm1385,yjm271,
LTR_TY1_2_ not in S288c	S288c	Chr05	436352	13	yjm1208,yjm1273,yjm1389,yjm1401,yjm1402,yjm1418,yjm1419,yjm1434,yjm1573,yjm1592,yjm1615,yjm470,yjm693,
LTR_TY1_2_ not in S288c	S288c	Chr05	436444	1	yjm271,
LTR_TY1_2_ not in S288c	S288c	Chr05	436599	2	yjm1342,yjm1443,
LTR_TY1_2_ not in S288c	S288c	Chr05	436946	1	yjm1433,
LTR_TY1_2_ not in S288c	S288c	Chr05	437746	4	yjm1326,yjm1336,yjm1356,yjm453,
LTR_TY1_2_ not in S288c	S288c	Chr05	438012	3	yjm1129,yjm1526,yjm1574,
LTR_TY1_2_ not in S288c	S288c	Chr05	438130	10	yjm1190,yjm1401,yjm1450,yjm1549,yjm320,yjm972,yjm981,yjm984,yjm990,yjm996,
LTR_TY1_2_ not in S288c	S288c	Chr05	438327	1	yjm470,
LTR_TY1_2_ not in S288c	S288c	Chr05	438327	5	yjm1078,yjm1381,yjm1527,yjm682,yjm683,
LTR_TY1_2_ not in S288c	S288c	Chr05	438481	5	yjm1248,yjm1381,yjm1439,yjm1549,yjm195,
LTR_TY1_2_ not in S288c	S288c	Chr05	438571	3	yjm1402,yjm1444,yjm1573,
LTR_TY1_2_ not in S288c	S288c	Chr05	438573	1	yjm1399,
LTR_TY1_2_ not in S288c	S288c	Chr05	438601	2	yjm1273,yjm1434,
LTR_TY1_2_ not in S288c	S288c	Chr05	440833	1	yjm1549,
LTR_TY1_2_ not in S288c	S288c	Chr05	440896	1	yjm1307,
LTR_TY1_2_ not in S288c	S288c	Chr05	441128	1	yjm1549,
LTR_TY1_2_ not in S288c	S288c	Chr05	441137	1	yjm1307,
LTR_TY1_2_ not in S288c	S288c	Chr05	441869	1	yjm1385,
LTR_TY1_2_ not in S288c	S288c	Chr05	442459	1	yjm470,
LTR_TY1_2_ not in S288c	S288c	Chr05	442834	2	yjm1381,yjm1401,
LTR_TY1_2_ not in S288c	S288c	Chr05	443069	1	yjm1307,
LTR_TY1_2_ not in S288c	S288c	Chr05	443069	3	yjm1400,yjm1479,yjm195,
LTR_TY1_2_ not in S288c	S288c	Chr05	443121	9	yjm1418,yjm975,yjm978,yjm981,yjm984,yjm987,yjm990,yjm993,yjm996,
LTR_TY1_2_ not in S288c	S288c	Chr05	443144	2	yjm1078,yjm1419,
LTR_TY1_2_ not in S288c	S288c	Chr05	443169	1	yjm195,
LTR_TY1_2_ not in S288c	S288c	Chr05	443182	3	yjm1190,yjm1342,yjm972,
LTR_TY1_2_ not in S288c	S288c	Chr05	443305	2	yjm1381,yjm451,
LTR_TY1_2_ not in S288c	S288c	Chr05	443497	1	yjm1549,
LTR_TY1_2_ not in S288c	S288c	Chr05	443696	2	yjm1248,yjm1439,
LTR_TY1_2_ not in S288c	S288c	Chr05	449004	1	yjm1083,
LTR_TY1_2_ not in S288c	S288c	Chr05	449053	1	yjm1248,
LTR_TY1_2_ not in S288c	S288c	Chr05	449401	1	yjm1383,
LTR_TY1_2_ not in S288c	S288c	Chr05	449625	20	yjm1083,yjm1199,yjm1202,yjm1208,yjm1248,yjm1383,yjm1400,yjm1401,yjm1439,yjm1479,yjm1549,yjm193,yjm195,yjm244,yjm248,yjm271,yjm320,yjm541,yjm555,yjm693,
LTR_TY1_2_ not in S288c	S288c	Chr05	449652	2	yjm1381,yjm1615,
LTR_TY1_2_ not in S288c	S288c	Chr05	449665	1	yjm1450,
LTR_TY1_2_ not in S288c	S288c	Chr05	449701	3	yjm1273,yjm1434,yjm1444,
LTR_TY1_2_ not in S288c	S288c	Chr05	449744	11	yjm1129,yjm1242,yjm1311,yjm1326,yjm1387,yjm1417,yjm1433,yjm1463,yjm1477,yjm1526,yjm1574,
LTR_TY1_2_ not in S288c	S288c	Chr05	449761	3	yjm1078,yjm1252,yjm428,
LTR_TY1_2_ not in S288c	S288c	Chr05	449798	2	yjm1244,yjm1402,
LTR_TY1_2_ not in S288c	S288c	Chr05	449869	1	yjm1399,
LTR_TY1_2_ not in S288c	S288c	Chr05	449987	4	yjm1342,yjm189,yjm244,yjm689,
LTR_TY1_2_ not in S288c	S288c	Chr05	468061	3	yjm1078,yjm1252,yjm248,
LTR_TY1_2_ not in S288c	S288c	Chr05	468768	5	yjm1199,yjm1202,yjm1332,yjm195,yjm451,
LTR_TY1_2_ not in S288c	S288c	Chr05	469218	3	yjm1248,yjm1439,yjm195,
LTR_TY1_2_ not in S288c	S288c	Chr05	487335	41	yjm1078,yjm1129,yjm1199,yjm1202,yjm1242,yjm1244,yjm1304,yjm1311,yjm1326,yjm1332,yjm1336,yjm1338,yjm1341,yjm1356,yjm1385,yjm1387,yjm1415,yjm1417,yjm1419,yjm1460,yjm1463,yjm1477,yjm1478,yjm1526,yjm1527,yjm1574,yjm248,yjm270,yjm428,yjm627,yjm693,yjm969,yjm972,yjm975,yjm978,yjm981,yjm984,yjm987,yjm990,yjm993,yjm996,
LTR_TY1_2_ not in S288c	S288c	Chr05	487788	1	yjm248,
LTR_TY1_2_ not in S288c	S288c	Chr05	488044	1	yjm1463,
LTR_TY1_2_ not in S288c	S288c	Chr05	488157	7	yjm1083,yjm1208,yjm1381,yjm1383,yjm1444,yjm189,yjm248,
LTR_TY1_2_ not in S288c	S288c	Chr05	492242	1	yjm1078,
LTR_TY1_2_ not in S288c	S288c	Chr05	492268	2	yjm1419,yjm1447,
LTR_TY1_2_ not in S288c	S288c	Chr05	492320	4	yjm1129,yjm1242,yjm1355,yjm1477,
LTR_TY1_2_ not in S288c	S288c	Chr05	492695	1	yjm1399,
LTR_TY1_2_ not in S288c	S288c	Chr05	498370	2	yjm1419,yjm453,
LTR_TY1_2_ not in S288c	S288c	Chr05	498430	16	yjm1252,yjm1307,yjm1383,yjm1385,yjm1386,yjm1388,yjm1443,yjm1450,yjm1549,yjm326,yjm451,yjm456,yjm470,yjm682,yjm683,yjm689,
LTR_TY1_2_ not in S288c	S288c	Chr05	498577	3	yjm1248,yjm1439,yjm195,
LTR_TY1_2_ not in S288c	S288c	Chr05	498660	2	yjm1342,yjm1443,
LTR_TY1_2_ not in S288c	S288c	Chr05	498674	1	yjm1447,
LTR_TY1_2_ not in S288c	S288c	Chr05	498751	10	yjm1311,yjm1389,yjm1450,yjm1460,yjm1592,yjm1615,yjm326,yjm451,yjm682,yjm683,
LTR_TY1_2_ not in S288c	S288c	Chr05	551290	1	yjm1355,
LTR_TY1_2_ not in S288c	S288c	Chr05	551507	1	yjm450,
LTR_TY1_2_ not in S288c	S288c	Chr05	551646	1	yjm681,
LTR_TY1_2_ not in S288c	S288c	Chr05	552092	1	yjm681,
LTR_TY1_2_ not in S288c	S288c	Chr05	552397	1	yjm1083,
LTR_TY1_2_ not in S288c	S288c	Chr05	560407	1	yjm1419,
LTR_TY1_2_ not in S288c	S288c	Chr05	565052	6	yjm1383,yjm1450,yjm320,yjm326,yjm682,yjm683,
LTR_TY1_2_ not in S288c	S288c	Chr05	565336	2	yjm682,yjm683,
LTR_TY1_2_ not in S288c	S288c	Chr05	569320	1	yjm1355,
LTR_TY1_2_ not in S288c	S288c	Chr06	26001	1	yjm1355,
LTR_TY1_2_ not in S288c	S288c	Chr06	57591	1	yjm1386,
LTR_TY1_2_ not in S288c	S288c	Chr06	99576	1	yjm1311,
LTR_TY1_2_ not in S288c	S288c	Chr06	100707	2	yjm1419,yjm1574,
LTR_TY1_2_ not in S288c	S288c	Chr06	100937	3	yjm1400,yjm1479,yjm1615,
LTR_TY1_2_ not in S288c	S288c	Chr06	101083	4	yjm1307,yjm1342,yjm1478,yjm244,
LTR_TY1_2_ not in S288c	S288c	Chr06	111251	4	yjm1248,yjm1439,yjm195,yjm627,
LTR_TY1_2_ not in S288c	S288c	Chr06	113036	1	yjm1463,
LTR_TY1_2_ not in S288c	S288c	Chr06	137216	1	yjm1190,
LTR_TY1_2_ not in S288c	S288c	Chr06	137909	1	yjm1208,
LTR_TY1_2_ not in S288c	S288c	Chr06	144852	1	yjm193,
LTR_TY1_2_ not in S288c	S288c	Chr06	145049	1	yjm996,
LTR_TY1_2_ not in S288c	S288c	Chr06	148647	1	yjm693,
LTR_TY1_2_ not in S288c	S288c	Chr06	157793	1	yjm1418,
LTR_TY1_2_ not in S288c	S288c	Chr06	157898	2	yjm1417,yjm451,
LTR_TY1_2_ not in S288c	S288c	Chr06	158054	2	yjm1389,yjm1418,
LTR_TY1_2_ not in S288c	S288c	Chr06	158114	50	yjm1078,yjm1083,yjm1129,yjm1133,yjm1242,yjm1244,yjm1250,yjm1252,yjm1332,yjm1336,yjm1341,yjm1356,yjm1381,yjm1383,yjm1386,yjm1387,yjm1399,yjm1415,yjm1417,yjm1433,yjm1450,yjm1463,yjm1477,yjm1478,yjm1526,yjm1527,yjm1574,yjm189,yjm193,yjm195,yjm244,yjm248,yjm270,yjm271,yjm451,yjm453,yjm470,yjm681,yjm689,yjm693,yjm969,yjm972,yjm975,yjm978,yjm981,yjm984,yjm987,yjm990,yjm993,yjm996,
LTR_TY1_2_ not in S288c	S288c	Chr06	158341	1	yjm1389,
LTR_TY1_2_ not in S288c	S288c	Chr06	158669	6	yjm1248,yjm1342,yjm1385,yjm1418,yjm1439,yjm627,
LTR_TY1_2_ not in S288c	S288c	Chr06	161447	1	yjm1355,
LTR_TY1_2_ not in S288c	S288c	Chr06	161693	1	yjm1083,
LTR_TY1_2_ not in S288c	S288c	Chr06	161698	2	yjm1385,yjm195,
LTR_TY1_2_ not in S288c	S288c	Chr06	161930	2	yjm1400,yjm1479,
LTR_TY1_2_ not in S288c	S288c	Chr06	167678	5	yjm1083,yjm1129,yjm1356,yjm1526,yjm189,
LTR_TY1_2_ not in S288c	S288c	Chr06	180835	3	yjm1250,yjm1592,yjm195,
LTR_TY1_2_ not in S288c	S288c	Chr06	180887	10	yjm1242,yjm1244,yjm1252,yjm1332,yjm1385,yjm1477,yjm1478,yjm1527,yjm453,yjm470,
LTR_TY1_2_ not in S288c	S288c	Chr06	181252	1	yjm1304,
LTR_TY1_2_ not in S288c	S288c	Chr06	181378	1	yjm1549,
LTR_TY1_2_ not in S288c	S288c	Chr06	181547	6	yjm1304,yjm1443,yjm1463,yjm326,yjm682,yjm683,
LTR_TY1_2_ not in S288c	S288c	Chr06	182006	2	yjm1402,yjm1573,
LTR_TY1_2_ not in S288c	S288c	Chr06	191484	2	yjm1463,yjm451,
LTR_TY1_2_ not in S288c	S288c	Chr06	191717	2	yjm1190,yjm1342,
LTR_TY1_2_ not in S288c	S288c	Chr06	204790	1	yjm1381,
LTR_TY1_2_ not in S288c	S288c	Chr06	204827	1	yjm1460,
LTR_TY1_2_ not in S288c	S288c	Chr06	204871	9	yjm1208,yjm1338,yjm1388,yjm1443,yjm1478,yjm1527,yjm195,yjm320,yjm541,
LTR_TY1_2_ not in S288c	S288c	Chr06	205011	4	yjm450,yjm555,yjm681,yjm689,
LTR_TY1_2_ not in S288c	S288c	Chr06	205044	5	yjm1208,yjm1402,yjm1478,yjm1573,yjm470,
LTR_TY1_2_ not in S288c	S288c	Chr06	205254	1	yjm555,
LTR_TY1_2_ not in S288c	S288c	Chr06	205446	9	yjm1248,yjm1273,yjm1342,yjm1400,yjm1434,yjm1439,yjm1447,yjm1479,yjm627,
LTR_TY1_2_ not in S288c	S288c	Chr06	206851	1	yjm555,
LTR_TY1_2_ not in S288c	S288c	Chr06	207146	1	yjm555,
LTR_TY1_2_ not in S288c	S288c	Chr06	256617	1	yjm1385,
LTR_TY1_2_ not in S288c	S288c	Chr06	257146	1	yjm1479,
LTR_TY1_2_ not in S288c	S288c	Chr06	261018	3	yjm326,yjm428,yjm682,
LTR_TY1_2_ not in S288c	S288c	Chr06	267017	1	yjm1387,
LTR_TY1_2_ not in S288c	S288c	Chr07	4379	2	yjm1574,yjm270,
LTR_TY1_2_ not in S288c	S288c	Chr07	6630	1	yjm189,
LTR_TY1_2_ not in S288c	S288c	Chr07	8019	1	yjm1399,
LTR_TY1_2_ not in S288c	S288c	Chr07	73700	1	yjm1248,
LTR_TY1_2_ not in S288c	S288c	Chr07	73914	18	yjm1078,yjm1252,yjm1332,yjm1338,yjm1356,yjm1385,yjm1387,yjm1399,yjm1433,yjm271,yjm456,yjm554,yjm627,yjm969,yjm972,yjm981,yjm987,yjm996,
LTR_TY1_2_ not in S288c	S288c	Chr07	73981	1	yjm193,
LTR_TY1_2_ not in S288c	S288c	Chr07	74168	31	yjm1190,yjm1242,yjm1244,yjm1250,yjm1304,yjm1326,yjm1336,yjm1341,yjm1342,yjm1415,yjm1417,yjm1444,yjm1450,yjm1463,yjm1477,yjm1526,yjm1527,yjm1574,yjm189,yjm248,yjm270,yjm428,yjm453,yjm555,yjm627,yjm681,yjm975,yjm978,yjm984,yjm990,yjm993,
LTR_TY1_2_ not in S288c	S288c	Chr07	110532	5	yjm1356,yjm1389,yjm1419,yjm1592,yjm627,
LTR_TY1_2_ not in S288c	S288c	Chr07	110596	3	yjm451,yjm456,yjm470,
LTR_TY1_2_ not in S288c	S288c	Chr07	110612	26	yjm1078,yjm1083,yjm1129,yjm1199,yjm1202,yjm1252,yjm1332,yjm1336,yjm1338,yjm1355,yjm1385,yjm1387,yjm1399,yjm1433,yjm1526,yjm1549,yjm1592,yjm193,yjm271,yjm689,yjm693,yjm969,yjm972,yjm981,yjm987,yjm996,
LTR_TY1_2_ not in S288c	S288c	Chr07	110828	2	yjm1381,yjm1479,
LTR_TY1_2_ not in S288c	S288c	Chr07	110899	2	yjm1388,yjm682,
LTR_TY1_2_ not in S288c	S288c	Chr07	110928	4	yjm1083,yjm1133,yjm1386,yjm1447,
LTR_TY1_2_ not in S288c	S288c	Chr07	111151	1	yjm1460,
LTR_TY1_2_ not in S288c	S288c	Chr07	111228	1	yjm470,
LTR_TY1_2_ not in S288c	S288c	Chr07	111447	2	yjm1402,yjm1573,
LTR_TY1_2_ not in S288c	S288c	Chr07	111698	30	yjm1242,yjm1244,yjm1250,yjm1304,yjm1326,yjm1341,yjm1355,yjm1356,yjm1381,yjm1415,yjm1417,yjm1444,yjm1450,yjm1463,yjm1477,yjm1478,yjm1574,yjm189,yjm244,yjm248,yjm270,yjm271,yjm428,yjm453,yjm627,yjm975,yjm978,yjm984,yjm990,yjm993,
LTR_TY1_2_ not in S288c	S288c	Chr07	111867	1	yjm1615,
LTR_TY1_2_ not in S288c	S288c	Chr07	114726	2	yjm1418,yjm1460,
LTR_TY1_2_ not in S288c	S288c	Chr07	114911	16	yjm1199,yjm1202,yjm1248,yjm1381,yjm1385,yjm1400,yjm1401,yjm1402,yjm1433,yjm1443,yjm1573,yjm244,yjm320,yjm326,yjm541,yjm554,
LTR_TY1_2_ not in S288c	S288c	Chr07	115123	3	yjm1078,yjm1389,yjm1419,
LTR_TY1_2_ not in S288c	S288c	Chr07	115198	5	yjm1202,yjm1381,yjm1383,yjm1439,yjm1444,
LTR_TY1_2_ not in S288c	S288c	Chr07	115287	3	yjm1417,yjm450,yjm683,
LTR_TY1_2_ not in S288c	S288c	Chr07	115324	2	yjm1402,yjm1573,
LTR_TY1_2_ not in S288c	S288c	Chr07	115337	1	yjm1304,
LTR_TY1_2_ not in S288c	S288c	Chr07	115364	3	yjm1389,yjm1419,yjm1592,
LTR_TY1_2_ not in S288c	S288c	Chr07	115391	2	yjm1383,yjm195,
LTR_TY1_2_ not in S288c	S288c	Chr07	115391	4	yjm320,yjm428,yjm541,yjm554,
LTR_TY1_2_ not in S288c	S288c	Chr07	121171	1	yjm1419,
LTR_TY1_2_ not in S288c	S288c	Chr07	121409	1	yjm1336,
LTR_TY1_2_ not in S288c	S288c	Chr07	121433	1	yjm1356,
LTR_TY1_2_ not in S288c	S288c	Chr07	121481	2	yjm1248,yjm1439,
LTR_TY1_2_ not in S288c	S288c	Chr07	121698	5	yjm1129,yjm1385,yjm1389,yjm1526,yjm689,
LTR_TY1_2_ not in S288c	S288c	Chr07	121773	1	yjm1383,
LTR_TY1_2_ not in S288c	S288c	Chr07	121795	1	yjm1549,
LTR_TY1_2_ not in S288c	S288c	Chr07	121872	2	yjm1400,yjm1479,
LTR_TY1_2_ not in S288c	S288c	Chr07	122131	2	yjm1190,yjm1389,
LTR_TY1_2_ not in S288c	S288c	Chr07	122525	2	yjm1389,yjm1592,
LTR_TY1_2_ not in S288c	S288c	Chr07	204239	2	yjm1417,yjm320,
LTR_TY1_2_ not in S288c	S288c	Chr07	204764	8	yjm1447,yjm972,yjm975,yjm978,yjm981,yjm987,yjm993,yjm996,
LTR_TY1_2_ not in S288c	S288c	Chr07	205045	1	yjm1460,
LTR_TY1_2_ not in S288c	S288c	Chr07	205313	2	yjm1342,yjm681,
LTR_TY1_2_ not in S288c	S288c	Chr07	205500	1	yjm1592,
LTR_TY1_2_ not in S288c	S288c	Chr07	255005	1	yjm1326,
LTR_TY1_2_ not in S288c	S288c	Chr07	287300	2	yjm1338,yjm195,
LTR_TY1_2_ not in S288c	S288c	Chr07	287350	2	yjm1083,yjm1385,
LTR_TY1_2_ not in S288c	S288c	Chr07	287440	6	yjm1388,yjm320,yjm326,yjm541,yjm554,yjm682,
LTR_TY1_2_ not in S288c	S288c	Chr07	287565	3	yjm1419,yjm1433,yjm450,
LTR_TY1_2_ not in S288c	S288c	Chr07	287607	3	yjm1307,yjm1527,yjm470,
LTR_TY1_2_ not in S288c	S288c	Chr07	287633	3	yjm1401,yjm1549,yjm195,
LTR_TY1_2_ not in S288c	S288c	Chr07	287773	4	yjm1190,yjm451,yjm555,yjm683,
LTR_TY1_2_ not in S288c	S288c	Chr07	288822	2	yjm1199,yjm1202,
LTR_TY1_2_ not in S288c	S288c	Chr07	318776	9	yjm1078,yjm1244,yjm1307,yjm1338,yjm1356,yjm1400,yjm1479,yjm1527,yjm554,
LTR_TY1_2_ not in S288c	S288c	Chr07	319080	3	yjm1133,yjm1444,yjm1478,
LTR_TY1_2_ not in S288c	S288c	Chr07	319193	2	yjm1355,yjm244,
LTR_TY1_2_ not in S288c	S288c	Chr07	319690	1	yjm270,
LTR_TY1_2_ not in S288c	S288c	Chr07	319761	1	yjm1419,
LTR_TY1_2_ not in S288c	S288c	Chr07	320522	1	yjm470,
LTR_TY1_2_ not in S288c	S288c	Chr07	321211	1	yjm1355,
LTR_TY1_2_ not in S288c	S288c	Chr07	327583	3	yjm1244,yjm1355,yjm195,
LTR_TY1_2_ not in S288c	S288c	Chr07	327763	7	yjm1248,yjm1400,yjm1439,yjm1478,yjm1479,yjm271,yjm627,
LTR_TY1_2_ not in S288c	S288c	Chr07	328179	2	yjm1388,yjm195,
LTR_TY1_2_ not in S288c	S288c	Chr07	328576	2	yjm1574,yjm453,
LTR_TY1_2_ not in S288c	S288c	Chr07	364654	1	yjm1574,
LTR_TY1_2_ not in S288c	S288c	Chr07	401431	1	yjm270,
LTR_TY1_2_ not in S288c	S288c	Chr07	401446	4	yjm1444,yjm450,yjm682,yjm689,
LTR_TY1_2_ not in S288c	S288c	Chr07	401452	4	yjm1078,yjm1252,yjm1387,yjm248,
LTR_TY1_2_ not in S288c	S288c	Chr07	401476	41	yjm1083,yjm1129,yjm1133,yjm1242,yjm1244,yjm1307,yjm1326,yjm1332,yjm1336,yjm1338,yjm1355,yjm1356,yjm1381,yjm1383,yjm1415,yjm1417,yjm1450,yjm1463,yjm1477,yjm1478,yjm1526,yjm1527,yjm1574,yjm189,yjm193,yjm244,yjm271,yjm326,yjm453,yjm681,yjm683,yjm693,yjm972,yjm975,yjm978,yjm981,yjm984,yjm987,yjm990,yjm993,yjm996,
LTR_TY1_2_ not in S288c	S288c	Chr07	401930	1	yjm1311,
LTR_TY1_2_ not in S288c	S288c	Chr07	404263	1	yjm1418,
LTR_TY1_2_ not in S288c	S288c	Chr07	404414	1	yjm1304,
LTR_TY1_2_ not in S288c	S288c	Chr07	404755	15	yjm1199,yjm1202,yjm1273,yjm1311,yjm1385,yjm1388,yjm1401,yjm1434,yjm1460,yjm1573,yjm1592,yjm1615,yjm320,yjm456,yjm555,
LTR_TY1_2_ not in S288c	S288c	Chr07	405252	43	yjm1129,yjm1199,yjm1242,yjm1244,yjm1307,yjm1326,yjm1332,yjm1336,yjm1338,yjm1341,yjm1342,yjm1387,yjm1399,yjm1400,yjm1415,yjm1417,yjm1450,yjm1463,yjm1477,yjm1478,yjm1479,yjm1526,yjm1549,yjm189,yjm193,yjm244,yjm270,yjm320,yjm326,yjm450,yjm453,yjm456,yjm682,yjm683,yjm689,yjm972,yjm975,yjm978,yjm981,yjm987,yjm990,yjm993,yjm996,
LTR_TY1_2_ not in S288c	S288c	Chr07	405390	1	yjm1356,
LTR_TY1_2_ not in S288c	S288c	Chr07	405488	1	yjm969,
LTR_TY1_2_ not in S288c	S288c	Chr07	412170	1	yjm195,
LTR_TY1_2_ not in S288c	S288c	Chr07	412281	5	yjm1326,yjm1381,yjm1433,yjm627,yjm683,
LTR_TY1_2_ not in S288c	S288c	Chr07	412446	2	yjm1342,yjm1447,
LTR_TY1_2_ not in S288c	S288c	Chr07	412523	2	yjm195,yjm683,
LTR_TY1_2_ not in S288c	S288c	Chr07	422483	6	yjm1129,yjm1336,yjm1478,yjm1526,yjm1549,yjm244,
LTR_TY1_2_ not in S288c	S288c	Chr07	423076	1	yjm195,
LTR_TY1_2_ not in S288c	S288c	Chr07	440706	2	yjm1248,yjm1439,
LTR_TY1_2_ not in S288c	S288c	Chr07	531172	2	yjm1336,yjm1526,
LTR_TY1_2_ not in S288c	S288c	Chr07	534919	1	yjm1387,
LTR_TY1_2_ not in S288c	S288c	Chr07	535543	3	yjm1248,yjm1439,yjm195,
LTR_TY1_2_ not in S288c	S288c	Chr07	541686	1	yjm1418,
LTR_TY1_2_ not in S288c	S288c	Chr07	541686	1	yjm195,
LTR_TY1_2_ not in S288c	S288c	Chr07	544571	2	yjm1248,yjm1439,
LTR_TY1_2_ not in S288c	S288c	Chr07	544714	1	yjm1311,
LTR_TY1_2_ not in S288c	S288c	Chr07	544846	2	yjm1248,yjm1439,
LTR_TY1_2_ not in S288c	S288c	Chr07	561075	1	yjm1419,
LTR_TY1_2_ not in S288c	S288c	Chr07	561977	1	yjm195,
LTR_TY1_2_ not in S288c	S288c	Chr07	567657	1	yjm1400,
LTR_TY1_2_ not in S288c	S288c	Chr07	567761	9	yjm1208,yjm1248,yjm1273,yjm1326,yjm1399,yjm1434,yjm1439,yjm1615,yjm541,
LTR_TY1_2_ not in S288c	S288c	Chr07	568984	1	yjm1419,
LTR_TY1_2_ not in S288c	S288c	Chr07	574700	2	yjm1400,yjm1479,
LTR_TY1_2_ not in S288c	S288c	Chr07	648468	2	yjm1342,yjm1460,
LTR_TY1_2_ not in S288c	S288c	Chr07	661074	9	yjm1248,yjm1383,yjm1400,yjm1401,yjm1439,yjm1460,yjm1479,yjm195,yjm627,
LTR_TY1_2_ not in S288c	S288c	Chr07	661346	1	yjm1250,
LTR_TY1_2_ not in S288c	S288c	Chr07	661377	4	yjm1342,yjm1355,yjm1399,yjm470,
LTR_TY1_2_ not in S288c	S288c	Chr07	699882	4	yjm1248,yjm1381,yjm1439,yjm627,
LTR_TY1_2_ not in S288c	S288c	Chr07	699940	2	yjm1332,yjm270,
LTR_TY1_2_ not in S288c	S288c	Chr07	700073	3	yjm1342,yjm1399,yjm428,
LTR_TY1_2_ not in S288c	S288c	Chr07	700862	4	yjm1078,yjm1252,yjm248,yjm451,
LTR_TY1_2_ not in S288c	S288c	Chr07	700896	3	yjm1355,yjm1381,yjm1402,
LTR_TY1_2_ not in S288c	S288c	Chr07	700926	3	yjm1401,yjm1419,yjm1444,
LTR_TY1_2_ not in S288c	S288c	Chr07	700963	3	yjm1386,yjm1573,yjm326,
LTR_TY1_2_ not in S288c	S288c	Chr07	700978	1	yjm1388,
LTR_TY1_2_ not in S288c	S288c	Chr07	700983	3	yjm1400,yjm1447,yjm1479,
LTR_TY1_2_ not in S288c	S288c	Chr07	701008	2	yjm1342,yjm1387,
LTR_TY1_2_ not in S288c	S288c	Chr07	701155	6	yjm1386,yjm1400,yjm1402,yjm1479,yjm326,yjm627,
LTR_TY1_2_ not in S288c	S288c	Chr07	701236	1	yjm1460,
LTR_TY1_2_ not in S288c	S288c	Chr07	701258	1	yjm1208,
LTR_TY1_2_ not in S288c	S288c	Chr07	701273	2	yjm1387,yjm1388,
LTR_TY1_2_ not in S288c	S288c	Chr07	707054	1	yjm270,
LTR_TY1_2_ not in S288c	S288c	Chr07	707192	6	yjm1129,yjm1252,yjm1387,yjm1463,yjm1526,yjm693,
LTR_TY1_2_ not in S288c	S288c	Chr14	707239	1	yjm1341,
LTR_TY1_2_ not in S288c	S288c	Chr07	707328	3	yjm1526,yjm1592,yjm271,
LTR_TY1_2_ not in S288c	S288c	Chr07	707374	1	yjm1549,
LTR_TY1_2_ not in S288c	S288c	Chr07	707394	2	yjm1083,yjm1355,
LTR_TY1_2_ not in S288c	S288c	Chr07	707472	1	yjm1460,
LTR_TY1_2_ not in S288c	S288c	Chr07	710223	2	yjm541,yjm554,
LTR_TY1_2_ not in S288c	S288c	Chr07	710681	1	yjm682,
LTR_TY1_2_ not in S288c	S288c	Chr07	711901	1	yjm326,
LTR_TY1_2_ not in S288c	S288c	Chr07	711901	1	yjm682,
LTR_TY1_2_ not in S288c	S288c	Chr07	711943	2	yjm1385,yjm1478,
LTR_TY1_2_ not in S288c	S288c	Chr07	712193	46	yjm1083,yjm1242,yjm1244,yjm1250,yjm1307,yjm1326,yjm1332,yjm1336,yjm1338,yjm1341,yjm1355,yjm1356,yjm1381,yjm1383,yjm1385,yjm1387,yjm1415,yjm1417,yjm1419,yjm1433,yjm1450,yjm1477,yjm1478,yjm1526,yjm1574,yjm193,yjm270,yjm271,yjm320,yjm326,yjm453,yjm456,yjm541,yjm554,yjm555,yjm681,yjm682,yjm683,yjm689,yjm969,yjm972,yjm978,yjm987,yjm990,yjm993,yjm996,
LTR_TY1_2_ not in S288c	S288c	Chr07	712405	2	yjm1381,yjm1418,
LTR_TY1_2_ not in S288c	S288c	Chr07	712546	5	yjm1418,yjm1433,yjm1434,yjm1450,yjm1460,
LTR_TY1_2_ not in S288c	S288c	Chr07	727753	1	yjm271,
LTR_TY1_2_ not in S288c	S288c	Chr07	730695	1	yjm1444,
LTR_TY1_2_ not in S288c	S288c	Chr07	730723	1	yjm1447,
LTR_TY1_2_ not in S288c	S288c	Chr07	730997	2	yjm1400,yjm1479,
LTR_TY1_2_ not in S288c	S288c	Chr07	734882	6	yjm1248,yjm1399,yjm1439,yjm326,yjm627,yjm683,
LTR_TY1_2_ not in S288c	S288c	Chr07	735387	2	yjm1443,yjm195,
LTR_TY1_2_ not in S288c	S288c	Chr07	735576	1	yjm450,
LTR_TY1_2_ not in S288c	S288c	Chr07	735806	6	yjm1078,yjm189,yjm244,yjm248,yjm450,yjm470,
LTR_TY1_2_ not in S288c	S288c	Chr07	736050	2	yjm1129,yjm1383,
LTR_TY1_2_ not in S288c	S288c	Chr07	736324	3	yjm1386,yjm1443,yjm195,
LTR_TY1_2_ not in S288c	S288c	Chr07	738685	1	yjm195,
LTR_TY1_2_ not in S288c	S288c	Chr07	738778	3	yjm1248,yjm1439,yjm627,
LTR_TY1_2_ not in S288c	S288c	Chr07	763823	1	yjm1304,
LTR_TY1_2_ not in S288c	S288c	Chr07	763823	1	yjm189,
LTR_TY1_2_ not in S288c	S288c	Chr07	765061	1	yjm1574,
LTR_TY1_2_ not in S288c	S288c	Chr07	773772	11	yjm1129,yjm1332,yjm1342,yjm1433,yjm1463,yjm326,yjm682,yjm683,yjm969,yjm981,yjm996,
LTR_TY1_2_ not in S288c	S288c	Chr07	773939	1	yjm1133,
LTR_TY1_2_ not in S288c	S288c	Chr07	774059	1	yjm1332,
LTR_TY1_2_ not in S288c	S288c	Chr07	774163	3	yjm1199,yjm326,yjm683,
LTR_TY1_2_ not in S288c	S288c	Chr07	774183	1	yjm450,
LTR_TY1_2_ not in S288c	S288c	Chr07	778869	2	yjm1078,yjm1244,
LTR_TY1_2_ not in S288c	S288c	Chr07	779112	14	yjm1202,yjm1208,yjm1307,yjm1388,yjm1389,yjm1400,yjm1401,yjm1419,yjm1479,yjm1592,yjm1615,yjm193,yjm195,yjm451,
LTR_TY1_2_ not in S288c	S288c	Chr07	779245	6	yjm1083,yjm1248,yjm1439,yjm1549,yjm248,yjm627,
LTR_TY1_2_ not in S288c	S288c	Chr07	779330	4	yjm1202,yjm1419,yjm193,yjm470,
LTR_TY1_2_ not in S288c	S288c	Chr07	779435	3	yjm1400,yjm1479,yjm195,
LTR_TY1_2_ not in S288c	S288c	Chr07	794064	1	yjm248,
LTR_TY1_2_ not in S288c	S288c	Chr07	794232	3	yjm1248,yjm1439,yjm248,
LTR_TY1_2_ not in S288c	S288c	Chr07	798260	1	yjm1388,
LTR_TY1_2_ not in S288c	S288c	Chr07	810834	3	yjm1385,yjm1450,yjm689,
LTR_TY1_2_ not in S288c	S288c	Chr07	811160	1	yjm1447,
LTR_TY1_2_ not in S288c	S288c	Chr07	811266	3	yjm1381,yjm1478,yjm1549,
LTR_TY1_2_ not in S288c	S288c	Chr07	823200	2	yjm1248,yjm1402,
LTR_TY1_2_ not in S288c	S288c	Chr07	823393	1	yjm1478,
LTR_TY1_2_ not in S288c	S288c	Chr07	844846	1	yjm1083,
LTR_TY1_2_ not in S288c	S288c	Chr07	845025	8	yjm1078,yjm1248,yjm1252,yjm1389,yjm1592,yjm195,yjm248,yjm627,
LTR_TY1_2_ not in S288c	S288c	Chr07	845177	1	yjm1342,
LTR_TY1_2_ not in S288c	S288c	Chr07	845188	1	yjm1444,
LTR_TY1_2_ not in S288c	S288c	Chr07	845211	2	yjm1386,yjm1387,
LTR_TY1_2_ not in S288c	S288c	Chr07	845429	1	yjm1447,
LTR_TY1_2_ not in S288c	S288c	Chr07	845491	1	yjm248,
LTR_TY1_2_ not in S288c	S288c	Chr07	857312	2	yjm1208,yjm195,
LTR_TY1_2_ not in S288c	S288c	Chr07	857378	1	yjm1433,
LTR_TY1_2_ not in S288c	S288c	Chr07	875653	1	yjm1304,
LTR_TY1_2_ not in S288c	S288c	Chr07	878641	1	yjm470,
LTR_TY1_2_ not in S288c	S288c	Chr07	878674	2	yjm1273,yjm1434,
LTR_TY1_2_ not in S288c	S288c	Chr07	878686	10	yjm1208,yjm1248,yjm1400,yjm1417,yjm1439,yjm1450,yjm1479,yjm1615,yjm195,yjm627,
LTR_TY1_2_ not in S288c	S288c	Chr07	878723	2	yjm1342,yjm1385,
LTR_TY1_2_ not in S288c	S288c	Chr07	878784	2	yjm1418,yjm451,
LTR_TY1_2_ not in S288c	S288c	Chr07	878836	1	yjm450,
LTR_TY1_2_ not in S288c	S288c	Chr07	878848	1	yjm1381,
LTR_TY1_2_ not in S288c	S288c	Chr07	878849	15	yjm1129,yjm1242,yjm1244,yjm1332,yjm1336,yjm1355,yjm1433,yjm1477,yjm1526,yjm326,yjm541,yjm554,yjm681,yjm682,yjm683,
LTR_TY1_2_ not in S288c	S288c	Chr07	878953	1	yjm1399,
LTR_TY1_2_ not in S288c	S288c	Chr07	878992	2	yjm1342,yjm1479,
LTR_TY1_2_ not in S288c	S288c	Chr07	878992	2	yjm1450,yjm470,
LTR_TY1_2_ not in S288c	S288c	Chr07	879045	5	yjm1400,yjm1401,yjm1463,yjm1479,yjm189,
LTR_TY1_2_ not in S288c	S288c	Chr07	930896	1	yjm1450,
LTR_TY1_2_ not in S288c	S288c	Chr07	930928	1	yjm1460,
LTR_TY1_2_ not in S288c	S288c	Chr07	930970	5	yjm1248,yjm1386,yjm1439,yjm195,yjm627,
LTR_TY1_2_ not in S288c	S288c	Chr07	962096	1	yjm1307,
LTR_TY1_2_ not in S288c	S288c	Chr07	1060131	1	yjm1460,
LTR_TY1_2_ not in S288c	S288c	Chr08	8939	2	yjm1400,yjm1479,
LTR_TY1_2_ not in S288c	S288c	Chr08	13251	1	yjm248,
LTR_TY1_2_ not in S288c	S288c	Chr08	53195	1	yjm1574,
LTR_TY1_2_ not in S288c	S288c	Chr08	71824	1	yjm1444,
LTR_TY1_2_ not in S288c	S288c	Chr08	85201	2	yjm1083,yjm1386,
LTR_TY1_2_ not in S288c	S288c	Chr08	85210	3	yjm1417,yjm1479,yjm195,
LTR_TY1_2_ not in S288c	S288c	Chr08	85625	2	yjm1307,yjm1419,
LTR_TY1_2_ not in S288c	S288c	Chr08	91120	1	yjm1386,
LTR_TY1_2_ not in S288c	S288c	Chr08	92128	2	yjm1400,yjm1439,
LTR_TY1_2_ not in S288c	S288c	Chr08	92128	4	yjm1399,yjm1450,yjm1615,yjm470,
LTR_TY1_2_ not in S288c	S288c	Chr08	92296	3	yjm1248,yjm195,yjm627,
LTR_TY1_2_ not in S288c	S288c	Chr08	92314	2	yjm1526,yjm470,
LTR_TY1_2_ not in S288c	S288c	Chr08	104804	2	yjm1385,yjm1401,
LTR_TY1_2_ not in S288c	S288c	Chr08	104834	1	yjm1401,
LTR_TY1_2_ not in S288c	S288c	Chr08	116026	1	yjm1083,
LTR_TY1_2_ not in S288c	S288c	Chr08	116051	3	yjm1242,yjm1252,yjm1477,
LTR_TY1_2_ not in S288c	S288c	Chr08	116081	1	yjm1250,
LTR_TY1_2_ not in S288c	S288c	Chr08	116205	3	yjm1083,yjm1385,yjm470,
LTR_TY1_2_ not in S288c	S288c	Chr08	116608	1	yjm1444,
LTR_TY1_2_ not in S288c	S288c	Chr08	116698	1	yjm1478,
LTR_TY1_2_ not in S288c	S288c	Chr08	116744	2	yjm1479,yjm681,
LTR_TY1_2_ not in S288c	S288c	Chr08	128989	1	yjm1307,
LTR_TY1_2_ not in S288c	S288c	Chr08	132881	3	yjm1342,yjm1443,yjm1460,
LTR_TY1_2_ not in S288c	S288c	Chr08	132934	6	yjm1248,yjm1439,yjm195,yjm627,yjm689,yjm693,
LTR_TY1_2_ not in S288c	S288c	Chr08	133097	1	yjm1447,
LTR_TY1_2_ not in S288c	S288c	Chr08	133119	1	yjm1332,
LTR_TY1_2_ not in S288c	S288c	Chr08	133196	1	yjm1460,
LTR_TY1_2_ not in S288c	S288c	Chr08	133119	7	yjm1250,yjm1326,yjm1381,yjm1386,yjm1527,yjm270,yjm693,
LTR_TY1_2_ not in S288c	S288c	Chr08	133343	73	yjm1078,yjm1083,yjm1133,yjm1190,yjm1199,yjm1202,yjm1208,yjm1242,yjm1244,yjm1250,yjm1252,yjm1273,yjm1307,yjm1311,yjm1326,yjm1332,yjm1336,yjm1338,yjm1341,yjm1342,yjm1355,yjm1356,yjm1381,yjm1383,yjm1385,yjm1386,yjm1387,yjm1388,yjm1389,yjm1399,yjm1400,yjm1401,yjm1402,yjm1415,yjm1417,yjm1418,yjm1419,yjm1433,yjm1434,yjm1443,yjm1444,yjm1447,yjm1450,yjm1460,yjm1463,yjm1477,yjm1573,yjm1592,yjm1615,yjm193,…
LTR_TY1_2_ not in S288c	S288c	Chr08	133439	1	yjm1304,
LTR_TY1_2_ not in S288c	S288c	Chr08	133463	1	yjm195,
LTR_TY1_2_ not in S288c	S288c	Chr08	133567	1	yjm693,
LTR_TY1_2_ not in S288c	S288c	Chr08	133586	2	yjm1439,yjm627,
LTR_TY1_2_ not in S288c	S288c	Chr08	133589	7	yjm1083,yjm1208,yjm1355,yjm1450,yjm1615,yjm270,yjm470,
LTR_TY1_2_ not in S288c	S288c	Chr08	133930	1	yjm969,
LTR_TY1_2_ not in S288c	S288c	Chr08	133931	2	yjm1199,yjm1463,
LTR_TY1_2_ not in S288c	S288c	Chr08	133985	19	yjm1129,yjm1304,yjm1400,yjm1444,yjm1478,yjm1479,yjm1526,yjm1527,yjm1549,yjm1574,yjm189,yjm555,yjm681,yjm969,yjm972,yjm978,yjm981,yjm987,yjm996,
LTR_TY1_2_ not in S288c	S288c	Chr08	134169	2	yjm1248,yjm1342,
LTR_TY1_2_ not in S288c	S288c	Chr08	146186	3	yjm1450,yjm1592,yjm470,
LTR_TY1_2_ not in S288c	S288c	Chr08	146439	1	yjm320,
LTR_TY1_2_ not in S288c	S288c	Chr08	146455	1	yjm1250,
LTR_TY1_2_ not in S288c	S288c	Chr08	146526	4	yjm1242,yjm1326,yjm244,yjm270,
LTR_TY1_2_ not in S288c	S288c	Chr08	146672	2	yjm1388,yjm1399,
LTR_TY1_2_ not in S288c	S288c	Chr08	146672	2	yjm1383,yjm193,
LTR_TY1_2_ not in S288c	S288c	Chr08	149356	2	yjm1419,yjm456,
LTR_TY1_2_ not in S288c	S288c	Chr08	230290	1	yjm1439,
LTR_TY1_2_ not in S288c	S288c	Chr08	237728	16	yjm1133,yjm1190,yjm1273,yjm1342,yjm1381,yjm1385,yjm1401,yjm1402,yjm1434,yjm1450,yjm1573,yjm428,yjm450,yjm451,yjm541,yjm682,
LTR_TY1_2_ not in S288c	S288c	Chr08	237858	8	yjm1304,yjm1311,yjm1401,yjm248,yjm320,yjm326,yjm554,yjm683,
LTR_TY1_2_ not in S288c	S288c	Chr08	237993	1	yjm1248,
LTR_TY1_2_ not in S288c	S288c	Chr08	237993	5	yjm1190,yjm1401,yjm1447,yjm450,yjm682,
LTR_TY1_2_ not in S288c	S288c	Chr08	358487	2	yjm1199,yjm1444,
LTR_TY1_2_ not in S288c	S288c	Chr08	358568	2	yjm1078,yjm248,
LTR_TY1_2_ not in S288c	S288c	Chr08	358599	11	yjm1311,yjm1342,yjm1399,yjm1418,yjm969,yjm972,yjm975,yjm984,yjm987,yjm990,yjm996,
LTR_TY1_2_ not in S288c	S288c	Chr08	359083	1	yjm1326,
LTR_TY1_2_ not in S288c	S288c	Chr08	388759	1	yjm1417,
LTR_TY1_2_ not in S288c	S288c	Chr08	388824	2	yjm1401,yjm1479,
LTR_TY1_2_ not in S288c	S288c	Chr08	388826	4	yjm1248,yjm1439,yjm195,yjm627,
LTR_TY1_2_ not in S288c	S288c	Chr08	388870	1	yjm1342,
LTR_TY1_2_ not in S288c	S288c	Chr08	388873	1	yjm1381,
LTR_TY1_2_ not in S288c	S288c	Chr08	389177	1	yjm1387,
LTR_TY1_2_ not in S288c	S288c	Chr08	389510	4	yjm1311,yjm1326,yjm1402,yjm1573,
LTR_TY1_2_ not in S288c	S288c	Chr08	389569	4	yjm1400,yjm1401,yjm1477,yjm1478,
LTR_TY1_2_ not in S288c	S288c	Chr08	389749	7	yjm1202,yjm1242,yjm1326,yjm1332,yjm1356,yjm1387,yjm1477,
LTR_TY1_2_ not in S288c	S288c	Chr08	390005	1	yjm1202,
LTR_TY1_2_ not in S288c	S288c	Chr08	451326	3	yjm1336,yjm1338,yjm189,
LTR_TY1_2_ not in S288c	S288c	Chr08	451990	1	yjm1304,
LTR_TY1_2_ not in S288c	S288c	Chr08	463620	1	yjm1447,
LTR_TY1_2_ not in S288c	S288c	Chr08	464736	1	yjm1399,
LTR_TY1_2_ not in S288c	S288c	Chr08	466289	1	yjm1190,
LTR_TY1_2_ not in S288c	S288c	Chr08	466291	1	yjm1419,
LTR_TY1_2_ not in S288c	S288c	Chr08	466328	3	yjm1342,yjm1463,yjm1478,
LTR_TY1_2_ not in S288c	S288c	Chr08	466545	1	yjm1250,
LTR_TY1_2_ not in S288c	S288c	Chr08	466590	1	yjm1419,
LTR_TY1_2_ not in S288c	S288c	Chr08	466641	11	yjm1078,yjm1311,yjm1381,yjm1385,yjm1450,yjm248,yjm326,yjm470,yjm554,yjm681,yjm683,
LTR_TY1_2_ not in S288c	S288c	Chr08	466691	2	yjm1133,yjm1478,
LTR_TY1_2_ not in S288c	S288c	Chr08	474318	2	yjm1574,yjm270,
LTR_TY1_2_ not in S288c	S288c	Chr08	475639	12	yjm1083,yjm1190,yjm1199,yjm1248,yjm1304,yjm1341,yjm1402,yjm1439,yjm1549,yjm244,yjm453,yjm682,
LTR_TY1_2_ not in S288c	S288c	Chr08	475957	2	yjm1248,yjm1439,
LTR_TY1_2_ not in S288c	S288c	Chr08	541970	1	yjm189,
LTR_TY1_2_ not in S288c	S288c	Chr08	553305	1	yjm1383,
LTR_TY1_2_ not in S288c	S288c	Chr08	553785	1	yjm1479,
LTR_TY1_2_ not in S288c	S288c	Chr09	25309	1	yjm1385,
LTR_TY1_2_ not in S288c	S288c	Chr09	163255	1	yjm1463,
LTR_TY1_2_ not in S288c	S288c	Chr09	174653	1	yjm456,
LTR_TY1_2_ not in S288c	S288c	Chr09	174697	1	yjm1447,
LTR_TY1_2_ not in S288c	S288c	Chr09	174962	1	yjm456,
LTR_TY1_2_ not in S288c	S288c	Chr09	183510	1	yjm1450,
LTR_TY1_2_ not in S288c	S288c	Chr09	183665	2	yjm1199,yjm1202,
LTR_TY1_2_ not in S288c	S288c	Chr09	195428	1	yjm1381,
LTR_TY1_2_ not in S288c	S288c	Chr09	196302	1	yjm1248,
LTR_TY1_2_ not in S288c	S288c	Chr09	196652	1	yjm456,
LTR_TY1_2_ not in S288c	S288c	Chr09	196840	12	yjm1083,yjm1307,yjm1388,yjm1389,yjm1400,yjm1401,yjm1450,yjm1460,yjm1479,yjm1592,yjm1615,yjm470,
LTR_TY1_2_ not in S288c	S288c	Chr09	196988	1	yjm1401,
LTR_TY1_2_ not in S288c	S288c	Chr09	197077	4	yjm1311,yjm1332,yjm1526,yjm1549,
LTR_TY1_2_ not in S288c	S288c	Chr09	197117	4	yjm326,yjm682,yjm683,yjm693,
LTR_TY1_2_ not in S288c	S288c	Chr09	197191	1	yjm1443,
LTR_TY1_2_ not in S288c	S288c	Chr09	197216	2	yjm1202,yjm1383,
LTR_TY1_2_ not in S288c	S288c	Chr09	197321	1	yjm1526,
LTR_TY1_2_ not in S288c	S288c	Chr09	197388	1	yjm683,
LTR_TY1_2_ not in S288c	S288c	Chr09	197422	2	yjm1439,yjm195,
LTR_TY1_2_ not in S288c	S288c	Chr09	197959	1	yjm1478,
LTR_TY1_2_ not in S288c	S288c	Chr09	198202	1	yjm1478,
LTR_TY1_2_ not in S288c	S288c	Chr09	204731	1	yjm1463,
LTR_TY1_2_ not in S288c	S288c	Chr09	204748	2	yjm1388,yjm248,
LTR_TY1_2_ not in S288c	S288c	Chr09	204789	2	yjm1400,yjm1479,
LTR_TY1_2_ not in S288c	S288c	Chr09	204913	2	yjm1326,yjm195,
LTR_TY1_2_ not in S288c	S288c	Chr09	204979	4	yjm1388,yjm1400,yjm1479,yjm248,
LTR_TY1_2_ not in S288c	S288c	Chr09	205323	2	yjm195,yjm270,
LTR_TY1_2_ not in S288c	S288c	Chr09	205767	2	yjm326,yjm682,
LTR_TY1_2_ not in S288c	S288c	Chr09	207917	2	yjm555,yjm682,
LTR_TY1_2_ not in S288c	S288c	Chr09	209344	1	yjm326,
LTR_TY1_2_ not in S288c	S288c	Chr09	210524	1	yjm271,
LTR_TY1_2_ not in S288c	S288c	Chr09	211942	1	yjm683,
LTR_TY1_2_ not in S288c	S288c	Chr09	246411	1	yjm1202,
LTR_TY1_2_ not in S288c	S288c	Chr09	300116	1	yjm1252,
LTR_TY1_2_ not in S288c	S288c	Chr09	300133	5	yjm1248,yjm1399,yjm1418,yjm1439,yjm555,
LTR_TY1_2_ not in S288c	S288c	Chr09	300684	2	yjm1383,yjm1399,
LTR_TY1_2_ not in S288c	S288c	Chr09	301462	17	yjm1190,yjm1273,yjm1304,yjm1307,yjm1342,yjm1386,yjm1399,yjm1402,yjm1418,yjm1419,yjm1434,yjm1443,yjm1460,yjm1573,yjm1615,yjm456,yjm555,
LTR_TY1_2_ not in S288c	S288c	Chr09	317438	1	yjm1342,
LTR_TY1_2_ not in S288c	S288c	Chr09	317438	1	yjm1573,
LTR_TY1_2_ not in S288c	S288c	Chr09	323900	1	yjm270,
LTR_TY1_2_ not in S288c	S288c	Chr09	324215	1	yjm1326,
LTR_TY1_2_ not in S288c	S288c	Chr09	324230	1	yjm1383,
LTR_TY1_2_ not in S288c	S288c	Chr09	324232	4	yjm1400,yjm1479,yjm453,yjm693,
LTR_TY1_2_ not in S288c	S288c	Chr09	324268	1	yjm1439,
LTR_TY1_2_ not in S288c	S288c	Chr09	324297	1	yjm450,
LTR_TY1_2_ not in S288c	S288c	Chr09	324309	2	yjm1248,yjm1381,
LTR_TY1_2_ not in S288c	S288c	Chr09	324349	14	yjm1083,yjm1133,yjm1199,yjm1202,yjm1304,yjm1307,yjm1342,yjm1388,yjm1389,yjm1402,yjm1460,yjm1573,yjm1592,yjm689,
LTR_TY1_2_ not in S288c	S288c	Chr09	324686	1	yjm1388,
LTR_TY1_2_ not in S288c	S288c	Chr09	324752	1	yjm1388,
LTR_TY1_2_ not in S288c	S288c	Chr09	324831	1	yjm1381,
LTR_TY1_2_ not in S288c	S288c	Chr09	324982	3	yjm1447,yjm1460,yjm195,
LTR_TY1_2_ not in S288c	S288c	Chr09	325164	6	yjm1248,yjm1381,yjm1383,yjm1399,yjm1419,yjm1439,
LTR_TY1_2_ not in S288c	S288c	Chr09	325464	1	yjm195,
LTR_TY1_2_ not in S288c	S288c	Chr09	325732	2	yjm541,yjm554,
LTR_TY1_2_ not in S288c	S288c	Chr09	336288	3	yjm1389,yjm1460,yjm1592,
LTR_TY1_2_ not in S288c	S288c	Chr09	336532	1	yjm1592,
LTR_TY1_2_ not in S288c	S288c	Chr09	336859	1	yjm1252,
LTR_TY1_2_ not in S288c	S288c	Chr09	369924	1	yjm1355,
LTR_TY1_2_ not in S288c	S288c	Chr09	369989	3	yjm1307,yjm1383,yjm693,
LTR_TY1_2_ not in S288c	S288c	Chr09	387352	1	yjm1342,
LTR_TY1_2_ not in S288c	S288c	Chr09	399298	1	yjm1385,
LTR_TY1_2_ not in S288c	S288c	Chr09	419496	1	yjm195,
LTR_TY1_2_ not in S288c	S288c	Chr09	430552	2	yjm1273,yjm1434,
LTR_TY1_2_ not in S288c	S288c	Chr09	432964	1	yjm1399,
LTR_TY1_2_ not in S288c	S288c	Chr10	20763	1	yjm1400,
LTR_TY1_2_ not in S288c	S288c	Chr10	24020	1	yjm1479,
LTR_TY1_2_ not in S288c	S288c	Chr10	27052	1	yjm1385,
LTR_TY1_2_ not in S288c	S288c	Chr10	27955	1	yjm555,
LTR_TY1_2_ not in S288c	S288c	Chr10	59027	1	yjm1244,
LTR_TY1_2_ not in S288c	S288c	Chr10	59072	1	yjm1447,
LTR_TY1_2_ not in S288c	S288c	Chr10	59075	1	yjm1342,
LTR_TY1_2_ not in S288c	S288c	Chr10	59122	49	yjm1078,yjm1129,yjm1190,yjm1208,yjm1242,yjm1248,yjm1252,yjm1304,yjm1307,yjm1332,yjm1336,yjm1338,yjm1341,yjm1355,yjm1356,yjm1381,yjm1383,yjm1385,yjm1415,yjm1417,yjm1433,yjm1439,yjm1460,yjm1463,yjm1477,yjm1478,yjm1526,yjm1549,yjm1615,yjm189,yjm193,yjm195,yjm244,yjm248,yjm270,yjm271,yjm451,yjm453,yjm627,yjm969,yjm972,yjm975,yjm978,yjm981,yjm984,yjm987,yjm990,yjm993,yjm996,
LTR_TY1_2_ not in S288c	S288c	Chr10	59309	1	yjm1419,
LTR_TY1_2_ not in S288c	S288c	Chr10	59316	6	yjm1244,yjm1248,yjm1326,yjm1341,yjm1439,yjm1443,
LTR_TY1_2_ not in S288c	S288c	Chr10	59624	3	yjm1311,yjm1444,yjm456,
LTR_TY1_2_ not in S288c	S288c	Chr10	59784	14	yjm1133,yjm1250,yjm1326,yjm1336,yjm1341,yjm1387,yjm1399,yjm1450,yjm320,yjm470,yjm541,yjm554,yjm681,yjm689,
LTR_TY1_2_ not in S288c	S288c	Chr10	60142	1	yjm693,
LTR_TY1_2_ not in S288c	S288c	Chr10	96842	6	yjm1248,yjm1355,yjm1439,yjm627,yjm689,yjm693,
LTR_TY1_2_ not in S288c	S288c	Chr10	115926	1	yjm1336,
LTR_TY1_2_ not in S288c	S288c	Chr10	116043	4	yjm1078,yjm1252,yjm248,yjm689,
LTR_TY1_2_ not in S288c	S288c	Chr10	197100	2	yjm1443,yjm1450,
LTR_TY1_2_ not in S288c	S288c	Chr10	197186	2	yjm1342,yjm1383,
LTR_TY1_2_ not in S288c	S288c	Chr10	197232	7	yjm1389,yjm1401,yjm1460,yjm1549,yjm1592,yjm1615,yjm682,
LTR_TY1_2_ not in S288c	S288c	Chr10	197249	1	yjm1307,
LTR_TY1_2_ not in S288c	S288c	Chr10	197276	1	yjm428,
LTR_TY1_2_ not in S288c	S288c	Chr10	197495	1	yjm1083,
LTR_TY1_2_ not in S288c	S288c	Chr10	197543	2	yjm1388,yjm271,
LTR_TY1_2_ not in S288c	S288c	Chr10	197628	1	yjm1381,
LTR_TY1_2_ not in S288c	S288c	Chr10	201154	1	yjm1419,
LTR_TY1_2_ not in S288c	S288c	Chr10	203127	2	yjm1385,yjm451,
LTR_TY1_2_ not in S288c	S288c	Chr10	203397	1	yjm1401,
LTR_TY1_2_ not in S288c	S288c	Chr08	203398	1	yjm1447,
LTR_TY1_2_ not in S288c	S288c	Chr10	203818	1	yjm1400,
LTR_TY1_2_ not in S288c	S288c	Chr10	204115	3	yjm1439,yjm1526,yjm627,
LTR_TY1_2_ not in S288c	S288c	Chr10	204198	2	yjm1250,yjm1401,
LTR_TY1_2_ not in S288c	S288c	Chr10	204225	1	yjm1574,
LTR_TY1_2_ not in S288c	S288c	Chr10	204236	1	yjm189,
LTR_TY1_2_ not in S288c	S288c	Chr10	204288	1	yjm1386,
LTR_TY1_2_ not in S288c	S288c	Chr10	204333	9	yjm1202,yjm1244,yjm1311,yjm1341,yjm1383,yjm1387,yjm193,yjm244,yjm270,
LTR_TY1_2_ not in S288c	S288c	Chr10	204662	1	yjm1419,
LTR_TY1_2_ not in S288c	S288c	Chr10	228464	2	yjm1307,yjm1450,
LTR_TY1_2_ not in S288c	S288c	Chr10	294721	1	yjm1401,
LTR_TY1_2_ not in S288c	S288c	Chr10	338694	1	yjm1326,
LTR_TY1_2_ not in S288c	S288c	Chr10	338694	1	yjm1401,
LTR_TY1_2_ not in S288c	S288c	Chr10	353773	4	yjm1342,yjm1385,yjm195,yjm271,
LTR_TY1_2_ not in S288c	S288c	Chr10	353806	2	yjm1311,yjm1447,
LTR_TY1_2_ not in S288c	S288c	Chr10	353858	2	yjm1252,yjm1355,
LTR_TY1_2_ not in S288c	S288c	Chr10	354226	1	yjm1433,
LTR_TY1_2_ not in S288c	S288c	Chr10	354394	31	yjm1129,yjm1190,yjm1199,yjm1242,yjm1244,yjm1250,yjm1332,yjm1336,yjm1341,yjm1355,yjm1356,yjm1387,yjm1415,yjm1417,yjm1477,yjm1478,yjm1526,yjm1549,yjm1574,yjm244,yjm453,yjm456,yjm683,yjm972,yjm975,yjm981,yjm984,yjm987,yjm990,yjm993,yjm996,
LTR_TY1_2_ not in S288c	S288c	Chr10	354462	4	yjm1202,yjm1252,yjm1383,yjm1450,
LTR_TY1_2_ not in S288c	S288c	Chr10	354503	1	yjm270,
LTR_TY1_2_ not in S288c	S288c	Chr10	354583	1	yjm320,
LTR_TY1_2_ not in S288c	S288c	Chr10	354639	2	yjm1444,yjm681,
LTR_TY1_2_ not in S288c	S288c	Chr10	354890	1	yjm1401,
LTR_TY1_2_ not in S288c	S288c	Chr10	355123	38	yjm1129,yjm1133,yjm1190,yjm1199,yjm1242,yjm1244,yjm1248,yjm1250,yjm1252,yjm1273,yjm1304,yjm1332,yjm1336,yjm1341,yjm1355,yjm1356,yjm1383,yjm1387,yjm1388,yjm1400,yjm1401,yjm1415,yjm1417,yjm1419,yjm1433,yjm1434,yjm1439,yjm1444,yjm1447,yjm1450,yjm1460,yjm1477,yjm1478,yjm1479,yjm1526,yjm1549,yjm1574,yjm193,
LTR_TY1_2_ not in S288c	S288c	Chr10	355175	1	yjm244,
LTR_TY1_2_ not in S288c	S288c	Chr10	355175	21	yjm1381,yjm1399,yjm195,yjm428,yjm453,yjm456,yjm470,yjm554,yjm627,yjm681,yjm683,yjm689,yjm972,yjm975,yjm978,yjm981,yjm984,yjm987,yjm990,yjm993,yjm996,
LTR_TY1_2_ not in S288c	S288c	Chr10	355454	1	yjm1443,
LTR_TY1_2_ not in S288c	S288c	Chr10	374517	1	yjm270,
LTR_TY1_2_ not in S288c	S288c	Chr10	374556	1	yjm1460,
LTR_TY1_2_ not in S288c	S288c	Chr10	374586	2	yjm1385,yjm1447,
LTR_TY1_2_ not in S288c	S288c	Chr10	374627	3	yjm1400,yjm1418,yjm1479,
LTR_TY1_2_ not in S288c	S288c	Chr10	376114	1	yjm470,
LTR_TY1_2_ not in S288c	S288c	Chr10	377120	3	yjm1447,yjm1478,yjm456,
LTR_TY1_2_ not in S288c	S288c	Chr10	377500	1	yjm1385,
LTR_TY1_2_ not in S288c	S288c	Chr10	377560	3	yjm1248,yjm1439,yjm627,
LTR_TY1_2_ not in S288c	S288c	Chr10	377816	2	yjm1400,yjm1479,
LTR_TY1_2_ not in S288c	S288c	Chr10	377845	1	yjm195,
LTR_TY1_2_ not in S288c	S288c	Chr10	377846	2	yjm1402,yjm1573,
LTR_TY1_2_ not in S288c	S288c	Chr10	377927	2	yjm1355,yjm1399,
LTR_TY1_2_ not in S288c	S288c	Chr10	377948	1	yjm683,
LTR_TY1_2_ not in S288c	S288c	Chr10	377982	1	yjm1252,
LTR_TY1_2_ not in S288c	S288c	Chr10	378010	2	yjm1342,yjm1383,
LTR_TY1_2_ not in S288c	S288c	Chr10	378177	2	yjm1400,yjm1479,
LTR_TY1_2_ not in S288c	S288c	Chr10	378192	1	yjm683,
LTR_TY1_2_ not in S288c	S288c	Chr10	396599	1	yjm1252,
LTR_TY1_2_ not in S288c	S288c	Chr10	396872	1	yjm1338,
LTR_TY1_2_ not in S288c	S288c	Chr10	415470	1	yjm450,
LTR_TY1_2_ not in S288c	S288c	Chr10	415835	4	yjm1248,yjm1252,yjm1385,yjm1439,
LTR_TY1_2_ not in S288c	S288c	Chr10	415921	6	yjm1083,yjm1400,yjm1447,yjm1463,yjm1479,yjm693,
LTR_TY1_2_ not in S288c	S288c	Chr10	416263	2	yjm1399,yjm428,
LTR_TY1_2_ not in S288c	S288c	Chr10	416378	1	yjm1401,
LTR_TY1_2_ not in S288c	S288c	Chr10	416378	2	yjm1450,yjm689,
LTR_TY1_2_ not in S288c	S288c	Chr10	416538	28	yjm1129,yjm1133,yjm1202,yjm1244,yjm1250,yjm1311,yjm1326,yjm1336,yjm1341,yjm1356,yjm1387,yjm1402,yjm1415,yjm1433,yjm1526,yjm1573,yjm1574,yjm627,yjm969,yjm972,yjm975,yjm978,yjm981,yjm984,yjm987,yjm990,yjm993,yjm996,
LTR_TY1_2_ not in S288c	S288c	Chr10	424324	10	yjm1190,yjm1311,yjm326,yjm682,yjm683,yjm969,yjm978,yjm981,yjm990,yjm996,
LTR_TY1_2_ not in S288c	S288c	Chr10	424442	1	yjm428,
LTR_TY1_2_ not in S288c	S288c	Chr10	424515	1	yjm1460,
LTR_TY1_2_ not in S288c	S288c	Chr10	424518	4	yjm1304,yjm320,yjm541,yjm554,
LTR_TY1_2_ not in S288c	S288c	Chr10	424589	1	yjm270,
LTR_TY1_2_ not in S288c	S288c	Chr10	453680	1	yjm470,
LTR_TY1_2_ not in S288c	S288c	Chr10	453798	1	yjm1326,
LTR_TY1_2_ not in S288c	S288c	Chr10	453957	1	yjm1444,
LTR_TY1_2_ not in S288c	S288c	Chr10	453984	1	yjm1526,
LTR_TY1_2_ not in S288c	S288c	Chr10	454155	1	yjm1444,
LTR_TY1_2_ not in S288c	S288c	Chr10	517726	1	yjm1463,
LTR_TY1_2_ not in S288c	S288c	Chr10	517747	5	yjm1248,yjm1250,yjm1439,yjm195,yjm627,
LTR_TY1_2_ not in S288c	S288c	Chr10	517756	1	yjm1307,
LTR_TY1_2_ not in S288c	S288c	Chr10	517776	2	yjm1250,yjm1444,
LTR_TY1_2_ not in S288c	S288c	Chr10	531161	2	yjm1202,yjm428,
LTR_TY1_2_ not in S288c	S288c	Chr10	531414	5	yjm1250,yjm1304,yjm1307,yjm1478,yjm689,
LTR_TY1_2_ not in S288c	S288c	Chr10	531428	1	yjm450,
LTR_TY1_2_ not in S288c	S288c	Chr10	537479	5	yjm1342,yjm972,yjm978,yjm984,yjm987,
LTR_TY1_2_ not in S288c	S288c	Chr10	537639	6	yjm1332,yjm1341,yjm1387,yjm1415,yjm1450,yjm470,
LTR_TY1_2_ not in S288c	S288c	Chr10	537684	2	yjm1307,yjm1549,
LTR_TY1_2_ not in S288c	S288c	Chr10	537701	6	yjm1250,yjm1381,yjm1400,yjm1433,yjm1479,yjm244,
LTR_TY1_2_ not in S288c	S288c	Chr10	537753	1	yjm1342,
LTR_TY1_2_ not in S288c	S288c	Chr10	537811	3	yjm1078,yjm1401,yjm1443,
LTR_TY1_2_ not in S288c	S288c	Chr10	538441	2	yjm1078,yjm1443,
LTR_TY1_2_ not in S288c	S288c	Chr10	540694	3	yjm1252,yjm1574,yjm451,
LTR_TY1_2_ not in S288c	S288c	Chr10	540795	2	yjm1248,yjm195,
LTR_TY1_2_ not in S288c	S288c	Chr10	540942	2	yjm1389,yjm1592,
LTR_TY1_2_ not in S288c	S288c	Chr10	541428	2	yjm1248,yjm195,
LTR_TY1_2_ not in S288c	S288c	Chr10	541428	12	yjm1250,yjm1252,yjm1383,yjm1385,yjm1399,yjm1401,yjm1418,yjm1419,yjm1450,yjm1574,yjm193,yjm681,
LTR_TY1_2_ not in S288c	S288c	Chr10	542849	2	yjm1338,yjm1383,
LTR_TY1_2_ not in S288c	S288c	Chr10	542910	2	yjm1574,yjm270,
LTR_TY1_2_ not in S288c	S288c	Chr10	542911	1	yjm1447,
LTR_TY1_2_ not in S288c	S288c	Chr10	543049	5	yjm1342,yjm326,yjm554,yjm682,yjm683,
LTR_TY1_2_ not in S288c	S288c	Chr10	543153	1	yjm1527,
LTR_TY1_2_ not in S288c	S288c	Chr10	543197	14	yjm1133,yjm1273,yjm1326,yjm1342,yjm1434,yjm1443,yjm1444,yjm1447,yjm326,yjm451,yjm456,yjm554,yjm682,yjm683,
LTR_TY1_2_ not in S288c	S288c	Chr10	543700	2	yjm1252,yjm681,
LTR_TY1_2_ not in S288c	S288c	Chr10	617470	2	yjm1401,yjm193,
LTR_TY1_2_ not in S288c	S288c	Chr10	722498	8	yjm1083,yjm1242,yjm1336,yjm1356,yjm1387,yjm1417,yjm1477,yjm453,
LTR_TY1_2_ not in S288c	S288c	Chr10	724997	2	yjm1199,yjm1202,
LTR_TY1_2_ not in S288c	S288c	Chr10	725291	1	yjm1202,
LTR_TY1_2_ not in S288c	S288c	Chr10	745074	1	yjm1381,
LTR_TY1_2_ not in S288c	S288c	Chr11	30618	1	yjm1332,
LTR_TY1_2_ not in S288c	S288c	Chr11	46666	2	yjm1250,yjm1549,
LTR_TY1_2_ not in S288c	S288c	Chr11	46730	5	yjm1133,yjm1385,yjm1447,yjm1463,yjm428,
LTR_TY1_2_ not in S288c	S288c	Chr11	74150	4	yjm1248,yjm1439,yjm195,yjm456,
LTR_TY1_2_ not in S288c	S288c	Chr11	74489	1	yjm1252,
LTR_TY1_2_ not in S288c	S288c	Chr11	83636	6	yjm1248,yjm1326,yjm1342,yjm1439,yjm195,yjm627,
LTR_TY1_2_ not in S288c	S288c	Chr11	83859	5	yjm1307,yjm1355,yjm1389,yjm1460,yjm1592,
LTR_TY1_2_ not in S288c	S288c	Chr11	140932	2	yjm1400,yjm1479,
LTR_TY1_2_ not in S288c	S288c	Chr11	140950	4	yjm1399,yjm1444,yjm1549,yjm693,
LTR_TY1_2_ not in S288c	S288c	Chr11	141231	1	yjm1478,
LTR_TY1_2_ not in S288c	S288c	Chr11	162582	1	yjm1417,
LTR_TY1_2_ not in S288c	S288c	Chr11	162721	2	yjm1400,yjm1479,
LTR_TY1_2_ not in S288c	S288c	Chr11	162731	1	yjm1250,
LTR_TY1_2_ not in S288c	S288c	Chr11	162782	2	yjm1129,yjm1526,
LTR_TY1_2_ not in S288c	S288c	Chr11	162973	3	yjm1250,yjm1332,yjm451,
LTR_TY1_2_ not in S288c	S288c	Chr11	201716	1	yjm1387,
LTR_TY1_2_ not in S288c	S288c	Chr11	201764	2	yjm1400,yjm1479,
LTR_TY1_2_ not in S288c	S288c	Chr11	202984	1	yjm1401,
LTR_TY1_2_ not in S288c	S288c	Chr11	219248	3	yjm1248,yjm1439,yjm627,
LTR_TY1_2_ not in S288c	S288c	Chr11	219726	1	yjm1342,
LTR_TY1_2_ not in S288c	S288c	Chr11	301977	1	yjm248,
LTR_TY1_2_ not in S288c	S288c	Chr11	302050	2	yjm1248,yjm1439,
LTR_TY1_2_ not in S288c	S288c	Chr11	302205	6	yjm1083,yjm428,yjm627,yjm972,yjm981,yjm990,
LTR_TY1_2_ not in S288c	S288c	Chr11	302442	1	yjm1383,
LTR_TY1_2_ not in S288c	S288c	Chr11	302479	2	yjm1129,yjm1252,
LTR_TY1_2_ not in S288c	S288c	Chr11	302576	1	yjm1463,
LTR_TY1_2_ not in S288c	S288c	Chr11	302820	2	yjm1388,yjm1478,
LTR_TY1_2_ not in S288c	S288c	Chr11	303216	1	yjm270,
LTR_TY1_2_ not in S288c	S288c	Chr11	308017	5	yjm1078,yjm1332,yjm1401,yjm270,yjm693,
LTR_TY1_2_ not in S288c	S288c	Chr11	308475	2	yjm193,yjm271,
LTR_TY1_2_ not in S288c	S288c	Chr11	308715	1	yjm1252,
LTR_TY1_2_ not in S288c	S288c	Chr11	313384	3	yjm1078,yjm1450,yjm248,
LTR_TY1_2_ not in S288c	S288c	Chr11	313993	1	yjm1250,
LTR_TY1_2_ not in S288c	S288c	Chr11	314525	1	yjm1342,
LTR_TY1_2_ not in S288c	S288c	Chr11	379218	4	yjm1273,yjm1402,yjm1434,yjm1573,
LTR_TY1_2_ not in S288c	S288c	Chr11	379249	2	yjm193,yjm271,
LTR_TY1_2_ not in S288c	S288c	Chr11	379503	1	yjm450,
LTR_TY1_2_ not in S288c	S288c	Chr11	379547	1	yjm1342,
LTR_TY1_2_ not in S288c	S288c	Chr11	432433	1	yjm1248,
LTR_TY1_2_ not in S288c	S288c	Chr11	457513	3	yjm1332,yjm1418,yjm470,
LTR_TY1_2_ not in S288c	S288c	Chr11	457808	2	yjm1307,yjm1383,
LTR_TY1_2_ not in S288c	S288c	Chr11	457882	1	yjm1573,
LTR_TY1_2_ not in S288c	S288c	Chr11	458472	2	yjm1307,yjm1383,
LTR_TY1_2_ not in S288c	S288c	Chr11	458486	1	yjm1342,
LTR_TY1_2_ not in S288c	S288c	Chr11	469083	1	yjm270,
LTR_TY1_2_ not in S288c	S288c	Chr11	490206	1	yjm1447,
LTR_TY1_2_ not in S288c	S288c	Chr11	490378	3	yjm1311,yjm1399,yjm470,
LTR_TY1_2_ not in S288c	S288c	Chr11	490607	2	yjm1463,yjm627,
LTR_TY1_2_ not in S288c	S288c	Chr11	490770	1	yjm470,
LTR_TY1_2_ not in S288c	S288c	Chr11	490842	1	yjm1252,
LTR_TY1_2_ not in S288c	S288c	Chr11	513231	6	yjm1248,yjm1311,yjm1338,yjm1439,yjm1443,yjm681,
LTR_TY1_2_ not in S288c	S288c	Chr11	513393	1	yjm1443,
LTR_TY1_2_ not in S288c	S288c	Chr11	513409	2	yjm1248,yjm1439,
LTR_TY1_2_ not in S288c	S288c	Chr11	513463	2	yjm1400,yjm1479,
LTR_TY1_2_ not in S288c	S288c	Chr11	513557	2	yjm1399,yjm271,
LTR_TY1_2_ not in S288c	S288c	Chr11	513608	4	yjm320,yjm541,yjm627,yjm682,
LTR_TY1_2_ not in S288c	S288c	Chr11	517096	9	yjm1083,yjm1307,yjm1311,yjm1338,yjm1401,yjm1419,yjm320,yjm451,yjm682,
LTR_TY1_2_ not in S288c	S288c	Chr11	517215	5	yjm1326,yjm1355,yjm1415,yjm1443,yjm326,
LTR_TY1_2_ not in S288c	S288c	Chr11	517863	1	yjm683,
LTR_TY1_2_ not in S288c	S288c	Chr11	518140	1	yjm627,
LTR_TY1_2_ not in S288c	S288c	Chr11	578187	2	yjm1248,yjm1439,
LTR_TY1_2_ not in S288c	S288c	Chr11	578885	1	yjm1478,
LTR_TY1_2_ not in S288c	S288c	Chr11	658121	1	yjm1252,
LTR_TY1_2_ not in S288c	S288c	Chr12	21593	1	yjm1417,
LTR_TY1_2_ not in S288c	S288c	Chr12	91533	3	yjm1202,yjm1401,yjm681,
LTR_TY1_2_ not in S288c	S288c	Chr12	91754	2	yjm1338,yjm1443,
LTR_TY1_2_ not in S288c	S288c	Chr12	92138	2	yjm1419,yjm270,
LTR_TY1_2_ not in S288c	S288c	Chr12	168020	8	yjm1244,yjm1332,yjm1381,yjm1383,yjm1385,yjm1402,yjm1574,yjm1592,
LTR_TY1_2_ not in S288c	S288c	Chr12	214787	4	yjm1190,yjm1419,yjm1443,yjm1527,
LTR_TY1_2_ not in S288c	S288c	Chr12	221005	1	yjm248,
LTR_TY1_2_ not in S288c	S288c	Chr12	365531	17	yjm1083,yjm1208,yjm1248,yjm1386,yjm1387,yjm1388,yjm1389,yjm1401,yjm1419,yjm1439,yjm1460,yjm1592,yjm193,yjm271,yjm320,yjm470,yjm627,
LTR_TY1_2_ not in S288c	S288c	Chr12	365844	8	yjm1326,yjm1342,yjm1381,yjm1400,yjm1433,yjm1479,yjm1615,yjm428,
LTR_TY1_2_ not in S288c	S288c	Chr12	366135	6	yjm1083,yjm1433,yjm1615,yjm193,yjm271,yjm428,
LTR_TY1_2_ not in S288c	S288c	Chr12	373116	5	yjm1208,yjm1304,yjm1433,yjm1478,yjm1615,
LTR_TY1_2_ not in S288c	S288c	Chr12	373464	2	yjm1326,yjm428,
LTR_TY1_2_ not in S288c	S288c	Chr12	373683	2	yjm1342,yjm320,
LTR_TY1_2_ not in S288c	S288c	Chr12	374338	1	yjm1342,
LTR_TY1_2_ not in S288c	S288c	Chr12	384462	1	yjm1341,
LTR_TY1_2_ not in S288c	S288c	Chr12	426476	3	yjm1342,yjm1400,yjm1479,
LTR_TY1_2_ not in S288c	S288c	Chr12	426582	7	yjm1444,yjm1478,yjm1527,yjm320,yjm450,yjm555,yjm681,
LTR_TY1_2_ not in S288c	S288c	Chr12	426657	1	yjm1355,
LTR_TY1_2_ not in S288c	S288c	Chr12	426705	2	yjm1252,yjm1400,
LTR_TY1_2_ not in S288c	S288c	Chr12	426770	4	yjm1400,yjm1402,yjm1479,yjm1573,
LTR_TY1_2_ not in S288c	S288c	Chr12	426826	2	yjm1444,yjm1478,
LTR_TY1_2_ not in S288c	S288c	Chr12	426941	1	yjm1355,
LTR_TY1_2_ not in S288c	S288c	Chr12	426949	1	yjm1252,
LTR_TY1_2_ not in S288c	S288c	Chr12	427132	1	yjm1439,
LTR_TY1_2_ not in S288c	S288c	Chr12	448552	4	yjm1129,yjm1311,yjm1419,yjm1526,
LTR_TY1_2_ not in S288c	S288c	Chr12	448645	4	yjm1342,yjm1381,yjm1447,yjm1549,
LTR_TY1_2_ not in S288c	S288c	Chr12	448692	1	yjm1199,
LTR_TY1_2_ not in S288c	S288c	Chr12	448796	2	yjm1386,yjm1418,
LTR_TY1_2_ not in S288c	S288c	Chr12	450203	2	yjm1389,yjm1592,
LTR_TY1_2_ not in S288c	S288c	Chr12	450624	5	yjm1083,yjm1248,yjm1439,yjm1463,yjm195,
LTR_TY1_2_ not in S288c	S288c	Chr12	490577	1	yjm195,
LTR_TY1_2_ not in S288c	S288c	Chr12	494099	1	yjm428,
LTR_TY1_2_ not in S288c	S288c	Chr12	569830	1	yjm270,
LTR_TY1_2_ not in S288c	S288c	Chr12	592430	4	yjm1190,yjm1311,yjm1381,yjm1386,
LTR_TY1_2_ not in S288c	S288c	Chr12	592532	5	yjm1190,yjm1252,yjm1311,yjm1381,yjm1463,
LTR_TY1_2_ not in S288c	S288c	Chr12	592718	1	yjm1387,
LTR_TY1_2_ not in S288c	S288c	Chr12	592720	7	yjm1338,yjm1342,yjm1389,yjm1433,yjm1443,yjm1592,yjm456,
LTR_TY1_2_ not in S288c	S288c	Chr12	592811	6	yjm1190,yjm1242,yjm1311,yjm1381,yjm1418,yjm1477,
LTR_TY1_2_ not in S288c	S288c	Chr12	592971	1	yjm1386,
LTR_TY1_2_ not in S288c	S288c	Chr12	593020	1	yjm1342,
LTR_TY1_2_ not in S288c	S288c	Chr12	599063	3	yjm1355,yjm1444,yjm1574,
LTR_TY1_2_ not in S288c	S288c	Chr12	605549	6	yjm1248,yjm1252,yjm1355,yjm1400,yjm1439,yjm1479,
LTR_TY1_2_ not in S288c	S288c	Chr12	610166	1	yjm681,
LTR_TY1_2_ not in S288c	S288c	Chr12	657085	3	yjm1400,yjm1479,yjm195,
LTR_TY1_2_ not in S288c	S288c	Chr12	687541	1	yjm1399,
LTR_TY1_2_ not in S288c	S288c	Chr12	687764	1	yjm1526,
LTR_TY1_2_ not in S288c	S288c	Chr12	687771	8	yjm1338,yjm1342,yjm1400,yjm1415,yjm1479,yjm1574,yjm470,yjm555,
LTR_TY1_2_ not in S288c	S288c	Chr12	688114	5	yjm1133,yjm1248,yjm320,yjm541,yjm554,
LTR_TY1_2_ not in S288c	S288c	Chr12	688374	12	yjm1190,yjm1202,yjm1386,yjm1387,yjm1388,yjm1389,yjm1460,yjm1463,yjm1549,yjm1592,yjm470,yjm555,
LTR_TY1_2_ not in S288c	S288c	Chr12	688476	2	yjm1273,yjm1434,
LTR_TY1_2_ not in S288c	S288c	Chr12	732001	1	yjm1083,
LTR_TY1_2_ not in S288c	S288c	Chr12	732001	5	yjm1190,yjm1383,yjm1385,yjm1527,yjm451,
LTR_TY1_2_ not in S288c	S288c	Chr12	732075	1	yjm1304,
LTR_TY1_2_ not in S288c	S288c	Chr12	733863	1	yjm1447,
LTR_TY1_2_ not in S288c	S288c	Chr12	734131	2	yjm1549,yjm470,
LTR_TY1_2_ not in S288c	S288c	Chr12	734367	7	yjm1083,yjm1250,yjm1326,yjm1401,yjm1417,yjm1450,yjm1527,
LTR_TY1_2_ not in S288c	S288c	Chr12	734616	1	yjm195,
LTR_TY1_2_ not in S288c	S288c	Chr12	734630	1	yjm1433,
LTR_TY1_2_ not in S288c	S288c	Chr12	734684	3	yjm1129,yjm1399,yjm1526,
LTR_TY1_2_ not in S288c	S288c	Chr12	734700	9	yjm1242,yjm1311,yjm1338,yjm1477,yjm1527,yjm428,yjm456,yjm555,yjm681,
LTR_TY1_2_ not in S288c	S288c	Chr12	783883	1	yjm1386,
LTR_TY1_2_ not in S288c	S288c	Chr12	783884	1	yjm1433,
LTR_TY1_2_ not in S288c	S288c	Chr12	783891	2	yjm1250,yjm1341,
LTR_TY1_2_ not in S288c	S288c	Chr12	784208	1	yjm1387,
LTR_TY1_2_ not in S288c	S288c	Chr12	784259	1	yjm1252,
LTR_TY1_2_ not in S288c	S288c	Chr12	784278	2	yjm1399,yjm270,
LTR_TY1_2_ not in S288c	S288c	Chr12	784278	1	yjm470,
LTR_TY1_2_ not in S288c	S288c	Chr12	792829	2	yjm1078,yjm1447,
LTR_TY1_2_ not in S288c	S288c	Chr12	793405	3	yjm1326,yjm1400,yjm1479,
LTR_TY1_2_ not in S288c	S288c	Chr12	793472	1	yjm1083,
LTR_TY1_2_ not in S288c	S288c	Chr12	793620	2	yjm195,yjm428,
LTR_TY1_2_ not in S288c	S288c	Chr12	793651	1	yjm1133,
LTR_TY1_2_ not in S288c	S288c	Chr12	793725	1	yjm1401,
LTR_TY1_2_ not in S288c	S288c	Chr12	793752	5	yjm1387,yjm1402,yjm1573,yjm554,yjm693,
LTR_TY1_2_ not in S288c	S288c	Chr12	793754	3	yjm1307,yjm1460,yjm1463,
LTR_TY1_2_ not in S288c	S288c	Chr12	793762	1	yjm1526,
LTR_TY1_2_ not in S288c	S288c	Chr12	796913	4	yjm1252,yjm1574,yjm248,yjm270,
LTR_TY1_2_ not in S288c	S288c	Chr12	796955	1	yjm195,
LTR_TY1_2_ not in S288c	S288c	Chr12	797013	1	yjm1383,
LTR_TY1_2_ not in S288c	S288c	Chr12	817902	2	yjm1400,yjm1479,
LTR_TY1_2_ not in S288c	S288c	Chr12	818020	1	yjm1478,
LTR_TY1_2_ not in S288c	S288c	Chr12	818229	18	yjm1078,yjm1129,yjm1202,yjm1242,yjm1244,yjm1248,yjm1326,yjm1336,yjm1338,yjm1386,yjm1399,yjm1415,yjm1439,yjm1450,yjm1549,yjm189,yjm456,yjm627,
LTR_TY1_2_ not in S288c	S288c	Chr12	818470	36	yjm1250,yjm1252,yjm1311,yjm1326,yjm1332,yjm1341,yjm1356,yjm1385,yjm1399,yjm1417,yjm1433,yjm1463,yjm1477,yjm1526,yjm1574,yjm193,yjm195,yjm244,yjm248,yjm270,yjm326,yjm453,yjm541,yjm554,yjm555,yjm681,yjm682,yjm683,yjm969,yjm972,yjm981,yjm984,yjm987,yjm990,yjm993,yjm996,
LTR_TY1_2_ not in S288c	S288c	Chr12	875359	1	yjm1387,
LTR_TY1_2_ not in S288c	S288c	Chr12	902636	6	yjm1208,yjm1304,yjm1381,yjm1615,yjm428,yjm451,
LTR_TY1_2_ not in S288c	S288c	Chr12	940943	1	yjm1307,
LTR_TY1_2_ not in S288c	S288c	Chr12	941469	1	yjm1252,
LTR_TY1_2_ not in S288c	S288c	Chr15	943074	1	yjm1381,
LTR_TY1_2_ not in S288c	S288c	Chr15	943479	1	yjm1387,
LTR_TY1_2_ not in S288c	S288c	Chr15	944760	1	yjm1133,
LTR_TY1_2_ not in S288c	S288c	Chr15	945101	2	yjm1332,yjm1387,
LTR_TY1_2_ not in S288c	S288c	Chr12	947142	1	yjm1307,
LTR_TY1_2_ not in S288c	S288c	Chr12	963135	4	yjm1388,yjm1389,yjm1460,yjm1592,
LTR_TY1_2_ not in S288c	S288c	Chr12	963135	1	yjm1463,
LTR_TY1_2_ not in S288c	S288c	Chr12	963166	3	yjm1304,yjm1342,yjm555,
LTR_TY1_2_ not in S288c	S288c	Chr12	963220	2	yjm1248,yjm1439,
LTR_TY1_2_ not in S288c	S288c	Chr12	963440	2	yjm1304,yjm195,
LTR_TY1_2_ not in S288c	S288c	Chr12	963473	1	yjm689,
LTR_TY1_2_ not in S288c	S288c	Chr12	963474	2	yjm1433,yjm1450,
LTR_TY1_2_ not in S288c	S288c	Chr12	975833	1	yjm1443,
LTR_TY1_2_ not in S288c	S288c	Chr12	976041	1	yjm1244,
LTR_TY1_2_ not in S288c	S288c	Chr12	976111	2	yjm1356,yjm1549,
LTR_TY1_2_ not in S288c	S288c	Chr12	976544	1	yjm1463,
LTR_TY1_2_ not in S288c	S288c	Chr12	977968	3	yjm1129,yjm1478,yjm244,
LTR_TY1_2_ not in S288c	S288c	Chr12	978436	2	yjm1244,yjm470,
LTR_TY1_2_ not in S288c	S288c	Chr12	980821	1	yjm1419,
LTR_TY1_2_ not in S288c	S288c	Chr12	980821	1	yjm1615,
LTR_TY1_2_ not in S288c	S288c	Chr12	981377	1	yjm978,
LTR_TY1_2_ not in S288c	S288c	Chr12	981423	1	yjm1387,
LTR_TY1_2_ not in S288c	S288c	Chr12	981554	8	yjm1202,yjm1242,yjm1336,yjm1338,yjm1342,yjm1415,yjm189,yjm972,
LTR_TY1_2_ not in S288c	S288c	Chr12	981649	20	yjm1129,yjm1190,yjm1242,yjm1304,yjm1311,yjm1336,yjm1355,yjm1356,yjm1417,yjm1433,yjm1450,yjm1477,yjm1478,yjm1526,yjm1549,yjm1574,yjm244,yjm453,yjm555,yjm681,
LTR_TY1_2_ not in S288c	S288c	Chr12	981666	4	yjm1129,yjm1326,yjm1450,yjm456,
LTR_TY1_2_ not in S288c	S288c	Chr12	981800	1	yjm1083,
LTR_TY1_2_ not in S288c	S288c	Chr12	981800	1	yjm1463,
LTR_TY1_2_ not in S288c	S288c	Chr12	981813	2	yjm1336,yjm189,
LTR_TY1_2_ not in S288c	S288c	Chr12	982223	1	yjm1083,
LTR_TY1_2_ not in S288c	S288c	Chr12	1003649	1	yjm456,
LTR_TY1_2_ not in S288c	S288c	Chr12	1003708	1	yjm1447,
LTR_TY1_2_ not in S288c	S288c	Chr12	1051937	2	yjm1248,yjm1439,
LTR_TY1_2_ not in S288c	S288c	Chr12	1051985	6	yjm1129,yjm1326,yjm1336,yjm195,yjm554,yjm681,
LTR_TY1_2_ not in S288c	S288c	Chr12	1052232	4	yjm1248,yjm1383,yjm1439,yjm195,
LTR_TY1_2_ not in S288c	S288c	Chr12	1052232	48	yjm1129,yjm1133,yjm1208,yjm1242,yjm1244,yjm1250,yjm1311,yjm1326,yjm1332,yjm1336,yjm1341,yjm1356,yjm1399,yjm1415,yjm1417,yjm1433,yjm1450,yjm1463,yjm1477,yjm1478,yjm1526,yjm1549,yjm1574,yjm189,yjm193,yjm244,yjm270,yjm271,yjm320,yjm428,yjm451,yjm453,yjm456,yjm541,yjm554,yjm555,yjm627,yjm681,yjm969,yjm972,yjm975,yjm978,yjm981,yjm984,yjm987,yjm990,yjm993,yjm996,
LTR_TY1_2_ not in S288c	S288c	Chr12	1052861	2	yjm1133,yjm555,
LTR_TY1_2_ not in S288c	S288c	Chr13	131778	1	yjm195,
LTR_TY1_2_ not in S288c	S288c	Chr13	131854	1	yjm1190,
LTR_TY1_2_ not in S288c	S288c	Chr13	131862	2	yjm1402,yjm1573,
LTR_TY1_2_ not in S288c	S288c	Chr13	131975	4	yjm1242,yjm1356,yjm1477,yjm453,
LTR_TY1_2_ not in S288c	S288c	Chr13	132508	1	yjm1355,
LTR_TY1_2_ not in S288c	S288c	Chr13	161029	1	yjm1447,
LTR_TY1_2_ not in S288c	S288c	Chr13	161823	1	yjm1447,
LTR_TY1_2_ not in S288c	S288c	Chr13	168112	5	yjm1250,yjm1332,yjm1419,yjm1527,yjm470,
LTR_TY1_2_ not in S288c	S288c	Chr13	168636	1	yjm1527,
LTR_TY1_2_ not in S288c	S288c	Chr13	183843	2	yjm1402,yjm1573,
LTR_TY1_2_ not in S288c	S288c	Chr13	184168	1	yjm195,
LTR_TY1_2_ not in S288c	S288c	Chr13	195749	2	yjm1385,yjm248,
LTR_TY1_2_ not in S288c	S288c	Chr13	196034	5	yjm1248,yjm1400,yjm1439,yjm1479,yjm627,
LTR_TY1_2_ not in S288c	S288c	Chr13	196035	48	yjm1078,yjm1129,yjm1133,yjm1190,yjm1199,yjm1202,yjm1208,yjm1242,yjm1244,yjm1252,yjm1326,yjm1332,yjm1336,yjm1341,yjm1355,yjm1356,yjm1383,yjm1386,yjm1387,yjm1401,yjm1415,yjm1417,yjm1463,yjm1477,yjm1526,yjm1574,yjm1615,yjm244,yjm248,yjm270,yjm271,yjm428,yjm451,yjm453,yjm470,yjm681,yjm689,yjm693,yjm969,yjm972,yjm975,yjm978,yjm981,yjm984,yjm987,yjm990,yjm993,yjm996,
LTR_TY1_2_ not in S288c	S288c	Chr13	196183	1	yjm1549,
LTR_TY1_2_ not in S288c	S288c	Chr02	196666	5	yjm1307,yjm1389,yjm1463,yjm1592,yjm450,
LTR_TY1_2_ not in S288c	S288c	Chr13	202179	1	yjm195,
LTR_TY1_2_ not in S288c	S288c	Chr13	202198	5	yjm1083,yjm1250,yjm1385,yjm326,yjm683,
LTR_TY1_2_ not in S288c	S288c	Chr13	202315	1	yjm1311,
LTR_TY1_2_ not in S288c	S288c	Chr13	202441	1	yjm1383,
LTR_TY1_2_ not in S288c	S288c	Chr13	259019	7	yjm1248,yjm1419,yjm1439,yjm195,yjm326,yjm627,yjm682,
LTR_TY1_2_ not in S288c	S288c	Chr13	268564	2	yjm1386,yjm555,
LTR_TY1_2_ not in S288c	S288c	Chr13	268808	2	yjm1386,yjm555,
LTR_TY1_2_ not in S288c	S288c	Chr13	290350	1	yjm1244,
LTR_TY1_2_ not in S288c	S288c	Chr13	321049	7	yjm1133,yjm1190,yjm1356,yjm1400,yjm1479,yjm320,yjm554,
LTR_TY1_2_ not in S288c	S288c	Chr13	321337	4	yjm1307,yjm1433,yjm193,yjm271,
LTR_TY1_2_ not in S288c	S288c	Chr13	351849	1	yjm1447,
LTR_TY1_2_ not in S288c	S288c	Chr13	356637	1	yjm693,
LTR_TY1_2_ not in S288c	S288c	Chr13	356684	6	yjm1133,yjm1202,yjm1244,yjm1326,yjm1399,yjm682,
LTR_TY1_2_ not in S288c	S288c	Chr13	358320	1	yjm1338,
LTR_TY1_2_ not in S288c	S288c	Chr13	361275	3	yjm1326,yjm541,yjm554,
LTR_TY1_2_ not in S288c	S288c	Chr13	361726	1	yjm1326,
LTR_TY1_2_ not in S288c	S288c	Chr13	361771	2	yjm541,yjm554,
LTR_TY1_2_ not in S288c	S288c	Chr13	362113	1	yjm470,
LTR_TY1_2_ not in S288c	S288c	Chr13	372336	7	yjm1208,yjm320,yjm326,yjm450,yjm456,yjm555,yjm683,
LTR_TY1_2_ not in S288c	S288c	Chr13	372411	4	yjm1248,yjm1439,yjm1443,yjm627,
LTR_TY1_2_ not in S288c	S288c	Chr13	377985	2	yjm1444,yjm689,
LTR_TY1_2_ not in S288c	S288c	Chr13	378183	1	yjm470,
LTR_TY1_2_ not in S288c	S288c	Chr13	378622	2	yjm1400,yjm1479,
LTR_TY1_2_ not in S288c	S288c	Chr13	378622	4	yjm1574,yjm270,yjm555,yjm683,
LTR_TY1_2_ not in S288c	S288c	Chr13	378681	5	yjm1250,yjm1307,yjm1338,yjm1574,yjm428,
LTR_TY1_2_ not in S288c	S288c	Chr13	378847	1	yjm1463,
LTR_TY1_2_ not in S288c	S288c	Chr13	379277	1	yjm450,
LTR_TY1_2_ not in S288c	S288c	Chr13	420513	1	yjm1342,
LTR_TY1_2_ not in S288c	S288c	Chr13	420976	1	yjm195,
LTR_TY1_2_ not in S288c	S288c	Chr13	453487	1	yjm1250,
LTR_TY1_2_ not in S288c	S288c	Chr13	463005	3	yjm1400,yjm1401,yjm1479,
LTR_TY1_2_ not in S288c	S288c	Chr13	463453	2	yjm1199,yjm1202,
LTR_TY1_2_ not in S288c	S288c	Chr13	480128	2	yjm1273,yjm1434,
LTR_TY1_2_ not in S288c	S288c	Chr13	480531	48	yjm1078,yjm1129,yjm1208,yjm1242,yjm1244,yjm1250,yjm1252,yjm1307,yjm1311,yjm1332,yjm1336,yjm1341,yjm1356,yjm1387,yjm1415,yjm1417,yjm1439,yjm1450,yjm1463,yjm1477,yjm1478,yjm1526,yjm1527,yjm1549,yjm1574,yjm1615,yjm189,yjm193,yjm244,yjm248,yjm270,yjm271,yjm326,yjm450,yjm453,yjm627,yjm682,yjm683,yjm969,yjm972,yjm975,yjm978,yjm981,yjm984,yjm987,yjm990,yjm993,yjm996,
LTR_TY1_2_ not in S288c	S288c	Chr13	480637	2	yjm1338,yjm456,
LTR_TY1_2_ not in S288c	S288c	Chr13	480722	2	yjm1199,yjm1202,
LTR_TY1_2_ not in S288c	S288c	Chr13	480732	9	yjm1133,yjm1190,yjm1304,yjm1307,yjm1326,yjm320,yjm541,yjm554,yjm555,
LTR_TY1_2_ not in S288c	S288c	Chr13	480881	36	yjm1083,yjm1133,yjm1190,yjm1199,yjm1248,yjm1304,yjm1307,yjm1326,yjm1338,yjm1342,yjm1386,yjm1388,yjm1389,yjm1399,yjm1401,yjm1402,yjm1418,yjm1443,yjm1447,yjm1450,yjm1460,yjm1526,yjm1573,yjm1592,yjm193,yjm195,yjm320,yjm428,yjm451,yjm456,yjm470,yjm541,yjm554,yjm555,yjm681,yjm689,
LTR_TY1_2_ not in S288c	S288c	Chr13	481163	3	yjm1400,yjm1439,yjm1479,
LTR_TY1_2_ not in S288c	S288c	Chr13	482789	1	yjm450,
LTR_TY1_2_ not in S288c	S288c	Chr13	493738	1	yjm1387,
LTR_TY1_2_ not in S288c	S288c	Chr13	502934	5	yjm1190,yjm320,yjm541,yjm554,yjm555,
LTR_TY1_2_ not in S288c	S288c	Chr13	503172	1	yjm1252,
LTR_TY1_2_ not in S288c	S288c	Chr13	503482	1	yjm681,
LTR_TY1_2_ not in S288c	S288c	Chr13	503698	7	yjm1208,yjm1389,yjm1400,yjm1401,yjm1443,yjm1460,yjm451,
LTR_TY1_2_ not in S288c	S288c	Chr13	503790	5	yjm1083,yjm1202,yjm1479,yjm1573,yjm326,
LTR_TY1_2_ not in S288c	S288c	Chr13	503970	27	yjm1083,yjm1208,yjm1273,yjm1307,yjm1338,yjm1342,yjm1383,yjm1388,yjm1389,yjm1400,yjm1402,yjm1433,yjm1434,yjm1447,yjm1460,yjm1463,yjm1479,yjm1573,yjm1592,yjm1615,yjm193,yjm271,yjm428,yjm451,yjm456,yjm470,yjm681,
LTR_TY1_2_ not in S288c	S288c	Chr13	504100	2	yjm1273,yjm1434,
LTR_TY1_2_ not in S288c	S288c	Chr13	504333	2	yjm1439,yjm689,
LTR_TY1_2_ not in S288c	S288c	Chr13	504400	1	yjm1443,
LTR_TY1_2_ not in S288c	S288c	Chr13	504422	8	yjm1248,yjm1304,yjm1342,yjm1381,yjm1389,yjm1418,yjm1592,yjm195,
LTR_TY1_2_ not in S288c	S288c	Chr13	534703	1	yjm1355,
LTR_TY1_2_ not in S288c	S288c	Chr13	568036	1	yjm1450,
LTR_TY1_2_ not in S288c	S288c	Chr13	572811	7	yjm1244,yjm1273,yjm1338,yjm1402,yjm1434,yjm1573,yjm456,
LTR_TY1_2_ not in S288c	S288c	Chr13	573279	1	yjm1460,
LTR_TY1_2_ not in S288c	S288c	Chr13	586810	1	yjm470,
LTR_TY1_2_ not in S288c	S288c	Chr13	747741	2	yjm1444,yjm1447,
LTR_TY1_2_ not in S288c	S288c	Chr13	747801	3	yjm1248,yjm1439,yjm453,
LTR_TY1_2_ not in S288c	S288c	Chr13	748006	1	yjm1342,
LTR_TY1_2_ not in S288c	S288c	Chr13	756968	1	yjm1385,
LTR_TY1_2_ not in S288c	S288c	Chr13	768227	2	yjm1399,yjm1574,
LTR_TY1_2_ not in S288c	S288c	Chr13	768318	1	yjm1447,
LTR_TY1_2_ not in S288c	S288c	Chr13	808101	2	yjm1447,yjm450,
LTR_TY1_2_ not in S288c	S288c	Chr13	808152	6	yjm1083,yjm1385,yjm1615,yjm195,yjm270,yjm627,
LTR_TY1_2_ not in S288c	S288c	Chr13	808369	3	yjm1250,yjm1342,yjm1478,
LTR_TY1_2_ not in S288c	S288c	Chr13	808536	8	yjm1133,yjm1199,yjm1248,yjm1338,yjm1385,yjm1439,yjm1447,yjm554,
LTR_TY1_2_ not in S288c	S288c	Chr13	808907	9	yjm1311,yjm1433,yjm193,yjm271,yjm326,yjm451,yjm470,yjm682,yjm683,
LTR_TY1_2_ not in S288c	S288c	Chr13	837171	1	yjm1355,
LTR_TY1_2_ not in S288c	S288c	Chr13	837315	2	yjm1083,yjm1574,
LTR_TY1_2_ not in S288c	S288c	Chr13	837346	1	yjm1418,
LTR_TY1_2_ not in S288c	S288c	Chr13	837348	1	yjm248,
LTR_TY1_2_ not in S288c	S288c	Chr13	837431	5	yjm1383,yjm1478,yjm193,yjm271,yjm693,
LTR_TY1_2_ not in S288c	S288c	Chr13	837675	1	yjm1478,
LTR_TY1_2_ not in S288c	S288c	Chr13	914664	1	yjm270,
LTR_TY1_2_ not in S288c	S288c	Chr13	920628	1	yjm1133,
LTR_TY1_2_ not in S288c	S288c	Chr14	8278	1	yjm248,
LTR_TY1_2_ not in S288c	S288c	Chr14	15360	2	yjm1129,yjm1526,
LTR_TY1_2_ not in S288c	S288c	Chr14	96157	5	yjm1133,yjm1418,yjm1444,yjm1527,yjm681,
LTR_TY1_2_ not in S288c	S288c	Chr14	96178	4	yjm1078,yjm1573,yjm248,yjm689,
LTR_TY1_2_ not in S288c	S288c	Chr14	96211	2	yjm1304,yjm1307,
LTR_TY1_2_ not in S288c	S288c	Chr14	96211	1	yjm1433,
LTR_TY1_2_ not in S288c	S288c	Chr14	96212	12	yjm1199,yjm1202,yjm1342,yjm1402,yjm1419,yjm1443,yjm1478,yjm450,yjm541,yjm554,yjm682,yjm683,
LTR_TY1_2_ not in S288c	S288c	Chr14	96239	16	yjm1133,yjm1248,yjm1252,yjm1388,yjm1389,yjm1400,yjm1439,yjm1444,yjm1447,yjm1460,yjm1463,yjm1479,yjm1527,yjm1574,yjm1592,yjm681,
LTR_TY1_2_ not in S288c	S288c	Chr14	96325	1	yjm1273,
LTR_TY1_2_ not in S288c	S288c	Chr14	96325	2	yjm1399,yjm627,
LTR_TY1_2_ not in S288c	S288c	Chr14	96373	1	yjm189,
LTR_TY1_2_ not in S288c	S288c	Chr14	96383	2	yjm193,yjm271,
LTR_TY1_2_ not in S288c	S288c	Chr14	96388	1	yjm451,
LTR_TY1_2_ not in S288c	S288c	Chr14	96391	1	yjm1415,
LTR_TY1_2_ not in S288c	S288c	Chr14	96402	2	yjm1450,yjm456,
LTR_TY1_2_ not in S288c	S288c	Chr14	96420	3	yjm1341,yjm320,yjm555,
LTR_TY1_2_ not in S288c	S288c	Chr14	96617	1	yjm1592,
LTR_TY1_2_ not in S288c	S288c	Chr14	96705	7	yjm1250,yjm270,yjm326,yjm450,yjm541,yjm554,yjm683,
LTR_TY1_2_ not in S288c	S288c	Chr14	98718	1	yjm1381,
LTR_TY1_2_ not in S288c	S288c	Chr14	98806	3	yjm1202,yjm1311,yjm1385,
LTR_TY1_2_ not in S288c	S288c	Chr14	99041	1	yjm1202,
LTR_TY1_2_ not in S288c	S288c	Chr14	99174	1	yjm1304,
LTR_TY1_2_ not in S288c	S288c	Chr14	99263	1	yjm1381,
LTR_TY1_2_ not in S288c	S288c	Chr14	100726	3	yjm1400,yjm1479,yjm1549,
LTR_TY1_2_ not in S288c	S288c	Chr14	101006	4	yjm1190,yjm1400,yjm1401,yjm1479,
LTR_TY1_2_ not in S288c	S288c	Chr14	102524	1	yjm195,
LTR_TY1_2_ not in S288c	S288c	Chr14	102524	15	yjm1208,yjm1244,yjm1248,yjm1252,yjm1386,yjm1389,yjm1419,yjm1434,yjm1439,yjm1460,yjm1478,yjm1615,yjm428,yjm451,yjm456,
LTR_TY1_2_ not in S288c	S288c	Chr14	102592	1	yjm1447,
LTR_TY1_2_ not in S288c	S288c	Chr14	102610	2	yjm1199,yjm555,
LTR_TY1_2_ not in S288c	S288c	Chr14	103978	3	yjm1250,yjm1355,yjm270,
LTR_TY1_2_ not in S288c	S288c	Chr14	104103	3	yjm1387,yjm1574,yjm195,
LTR_TY1_2_ not in S288c	S288c	Chr14	104228	4	yjm1083,yjm1273,yjm1356,yjm1434,
LTR_TY1_2_ not in S288c	S288c	Chr14	104364	1	yjm1383,
LTR_TY1_2_ not in S288c	S288c	Chr14	104388	5	yjm1342,yjm1417,yjm1549,yjm193,yjm271,
LTR_TY1_2_ not in S288c	S288c	Chr14	120709	2	yjm1400,yjm1479,
LTR_TY1_2_ not in S288c	S288c	Chr14	237992	1	yjm1450,
LTR_TY1_2_ not in S288c	S288c	Chr14	373885	4	yjm969,yjm972,yjm978,yjm993,
LTR_TY1_2_ not in S288c	S288c	Chr14	442315	1	yjm1326,
LTR_TY1_2_ not in S288c	S288c	Chr14	442361	1	yjm195,
LTR_TY1_2_ not in S288c	S288c	Chr14	442469	2	yjm1460,yjm683,
LTR_TY1_2_ not in S288c	S288c	Chr14	442521	15	yjm1133,yjm1199,yjm1202,yjm1399,yjm1447,yjm1615,yjm320,yjm326,yjm428,yjm456,yjm541,yjm554,yjm555,yjm681,yjm682,
LTR_TY1_2_ not in S288c	S288c	Chr14	505225	1	yjm1385,
LTR_TY1_2_ not in S288c	S288c	Chr14	524886	1	yjm1355,
LTR_TY1_2_ not in S288c	S288c	Chr14	546403	2	yjm1252,yjm1355,
LTR_TY1_2_ not in S288c	S288c	Chr14	546827	1	yjm1355,
LTR_TY1_2_ not in S288c	S288c	Chr14	560340	1	yjm1342,
LTR_TY1_2_ not in S288c	S288c	Chr14	560566	2	yjm1307,yjm1447,
LTR_TY1_2_ not in S288c	S288c	Chr14	560681	2	yjm1336,yjm627,
LTR_TY1_2_ not in S288c	S288c	Chr14	560813	1	yjm270,
LTR_TY1_2_ not in S288c	S288c	Chr14	560845	5	yjm1208,yjm1307,yjm1419,yjm1444,yjm470,
LTR_TY1_2_ not in S288c	S288c	Chr14	560938	4	yjm1574,yjm326,yjm682,yjm683,
LTR_TY1_2_ not in S288c	S288c	Chr14	560966	10	yjm1202,yjm1250,yjm1304,yjm1355,yjm1381,yjm1385,yjm1386,yjm1444,yjm1450,yjm450,
LTR_TY1_2_ not in S288c	S288c	Chr14	561107	4	yjm1273,yjm1338,yjm1434,yjm1443,
LTR_TY1_2_ not in S288c	S288c	Chr14	561134	1	yjm1444,
LTR_TY1_2_ not in S288c	S288c	Chr14	561187	5	yjm1129,yjm1341,yjm1356,yjm1478,yjm271,
LTR_TY1_2_ not in S288c	S288c	Chr14	561189	6	yjm1199,yjm1244,yjm195,yjm326,yjm682,yjm683,
LTR_TY1_2_ not in S288c	S288c	Chr14	561307	5	yjm1078,yjm1248,yjm1439,yjm248,yjm453,
LTR_TY1_2_ not in S288c	S288c	Chr14	561507	1	yjm1342,
LTR_TY1_2_ not in S288c	S288c	Chr14	561749	1	yjm1401,
LTR_TY1_2_ not in S288c	S288c	Chr14	562691	1	yjm1439,
LTR_TY1_2_ not in S288c	S288c	Chr14	566765	2	yjm1419,yjm1549,
LTR_TY1_2_ not in S288c	S288c	Chr14	567993	1	yjm428,
LTR_TY1_2_ not in S288c	S288c	Chr14	570251	1	yjm1381,
LTR_TY1_2_ not in S288c	S288c	Chr14	570418	1	yjm1573,
LTR_TY1_2_ not in S288c	S288c	Chr14	570767	1	yjm1381,
LTR_TY1_2_ not in S288c	S288c	Chr14	570799	1	yjm1342,
LTR_TY1_2_ not in S288c	S288c	Chr14	571132	1	yjm1573,
LTR_TY1_2_ not in S288c	S288c	Chr14	571941	1	yjm1311,
LTR_TY1_2_ not in S288c	S288c	Chr14	572559	1	yjm541,
LTR_TY1_2_ not in S288c	S288c	Chr14	625880	1	yjm1332,
LTR_TY1_2_ not in S288c	S288c	Chr14	627274	1	yjm470,
LTR_TY1_2_ not in S288c	S288c	Chr14	631299	1	yjm244,
LTR_TY1_2_ not in S288c	S288c	Chr14	631799	3	yjm1250,yjm1341,yjm1415,
LTR_TY1_2_ not in S288c	S288c	Chr14	631861	1	yjm1133,
LTR_TY1_2_ not in S288c	S288c	Chr14	631864	1	yjm1307,
LTR_TY1_2_ not in S288c	S288c	Chr14	631874	1	yjm1342,
LTR_TY1_2_ not in S288c	S288c	Chr14	631875	1	yjm456,
LTR_TY1_2_ not in S288c	S288c	Chr14	631891	1	yjm1418,
LTR_TY1_2_ not in S288c	S288c	Chr14	631904	1	yjm554,
LTR_TY1_2_ not in S288c	S288c	Chr14	631963	1	yjm1399,
LTR_TY1_2_ not in S288c	S288c	Chr14	631995	5	yjm1078,yjm1242,yjm1252,yjm1477,yjm248,
LTR_TY1_2_ not in S288c	S288c	Chr14	632043	2	yjm1444,yjm470,
LTR_TY1_2_ not in S288c	S288c	Chr02	632132	1	yjm1592,
LTR_TY1_2_ not in S288c	S288c	Chr14	632134	14	yjm1083,yjm1326,yjm1381,yjm1386,yjm1388,yjm1389,yjm1401,yjm1460,yjm1463,yjm1479,yjm1592,yjm320,yjm326,yjm451,
LTR_TY1_2_ not in S288c	S288c	Chr14	632398	1	yjm1418,
LTR_TY1_2_ not in S288c	S288c	Chr14	632415	2	yjm1199,yjm326,
LTR_TY1_2_ not in S288c	S288c	Chr14	632468	1	yjm1248,
LTR_TY1_2_ not in S288c	S288c	Chr14	632480	3	yjm1460,yjm1463,yjm470,
LTR_TY1_2_ not in S288c	S288c	Chr14	725998	3	yjm1399,yjm451,yjm541,
LTR_TY1_2_ not in S288c	S288c	Chr14	726061	1	yjm1383,
LTR_TY1_2_ not in S288c	S288c	Chr12	726338	1	yjm1355,
LTR_TY1_2_ not in S288c	S288c	Chr14	726591	1	yjm1549,
LTR_TY1_2_ not in S288c	S288c	Chr14	726994	5	yjm1388,yjm1389,yjm1460,yjm1592,yjm627,
LTR_TY1_2_ not in S288c	S288c	Chr14	727223	1	yjm627,
LTR_TY1_2_ not in S288c	S288c	Chr14	776290	1	yjm1199,
LTR_TY1_2_ not in S288c	S288c	Chr15	12004	1	yjm1399,
LTR_TY1_2_ not in S288c	S288c	Chr15	18814	1	yjm1355,
LTR_TY1_2_ not in S288c	S288c	Chr15	30946	1	yjm1400,
LTR_TY1_2_ not in S288c	S288c	Chr15	32219	2	yjm1400,yjm1479,
LTR_TY1_2_ not in S288c	S288c	Chr15	110857	3	yjm1129,yjm1526,yjm195,
LTR_TY1_2_ not in S288c	S288c	Chr15	110892	4	yjm1381,yjm1386,yjm1402,yjm681,
LTR_TY1_2_ not in S288c	S288c	Chr15	110938	1	yjm1478,
LTR_TY1_2_ not in S288c	S288c	Chr15	111128	2	yjm1400,yjm1479,
LTR_TY1_2_ not in S288c	S288c	Chr15	111128	1	yjm1526,
LTR_TY1_2_ not in S288c	S288c	Chr15	111133	4	yjm1307,yjm1326,yjm1573,yjm681,
LTR_TY1_2_ not in S288c	S288c	Chr15	111227	1	yjm1418,
LTR_TY1_2_ not in S288c	S288c	Chr15	112753	1	yjm1450,
LTR_TY1_2_ not in S288c	S288c	Chr15	112997	1	yjm1450,
LTR_TY1_2_ not in S288c	S288c	Chr15	113221	2	yjm1400,yjm1479,
LTR_TY1_2_ not in S288c	S288c	Chr15	113684	1	yjm1447,
LTR_TY1_2_ not in S288c	S288c	Chr15	113707	1	yjm682,
LTR_TY1_2_ not in S288c	S288c	Chr15	120613	1	yjm1342,
LTR_TY1_2_ not in S288c	S288c	Chr15	123291	1	yjm1478,
LTR_TY1_2_ not in S288c	S288c	Chr15	160098	2	yjm1202,yjm1450,
LTR_TY1_2_ not in S288c	S288c	Chr15	226474	2	yjm1383,yjm1386,
LTR_TY1_2_ not in S288c	S288c	Chr15	226524	1	yjm1463,
LTR_TY1_2_ not in S288c	S288c	Chr15	226598	1	yjm1311,
LTR_TY1_2_ not in S288c	S288c	Chr15	226613	1	yjm1342,
LTR_TY1_2_ not in S288c	S288c	Chr15	226746	5	yjm1248,yjm1439,yjm195,yjm244,yjm627,
LTR_TY1_2_ not in S288c	S288c	Chr15	226885	10	yjm1199,yjm1307,yjm1326,yjm1388,yjm1389,yjm1401,yjm1447,yjm1460,yjm1592,yjm470,
LTR_TY1_2_ not in S288c	S288c	Chr15	227126	1	yjm1450,
LTR_TY1_2_ not in S288c	S288c	Chr15	227137	1	yjm1202,
LTR_TY1_2_ not in S288c	S288c	Chr15	227737	1	yjm1615,
LTR_TY1_2_ not in S288c	S288c	Chr15	227755	4	yjm1400,yjm1479,yjm1574,yjm555,
LTR_TY1_2_ not in S288c	S288c	Chr15	227906	4	yjm1402,yjm1573,yjm451,yjm683,
LTR_TY1_2_ not in S288c	S288c	Chr15	228141	1	yjm1383,
LTR_TY1_2_ not in S288c	S288c	Chr15	228220	1	yjm1399,
LTR_TY1_2_ not in S288c	S288c	Chr15	274271	5	yjm1389,yjm1401,yjm1447,yjm1460,yjm1592,
LTR_TY1_2_ not in S288c	S288c	Chr15	281403	3	yjm1208,yjm1341,yjm1615,
LTR_TY1_2_ not in S288c	S288c	Chr15	300423	1	yjm1250,
LTR_TY1_2_ not in S288c	S288c	Chr15	300620	9	yjm1338,yjm1402,yjm1443,yjm1573,yjm320,yjm450,yjm541,yjm555,yjm693,
LTR_TY1_2_ not in S288c	S288c	Chr15	300686	6	yjm1078,yjm1248,yjm1252,yjm1439,yjm195,yjm248,
LTR_TY1_2_ not in S288c	S288c	Chr15	300915	3	yjm1202,yjm1326,yjm555,
LTR_TY1_2_ not in S288c	S288c	Chr15	300980	2	yjm1419,yjm1573,
LTR_TY1_2_ not in S288c	S288c	Chr15	304449	1	yjm1355,
LTR_TY1_2_ not in S288c	S288c	Chr15	326086	1	yjm450,
LTR_TY1_2_ not in S288c	S288c	Chr15	340312	1	yjm1078,
LTR_TY1_2_ not in S288c	S288c	Chr15	340695	1	yjm193,
LTR_TY1_2_ not in S288c	S288c	Chr15	348047	2	yjm1383,yjm428,
LTR_TY1_2_ not in S288c	S288c	Chr15	354009	1	yjm1355,
LTR_TY1_2_ not in S288c	S288c	Chr15	354067	6	yjm1083,yjm1248,yjm1439,yjm195,yjm248,yjm451,
LTR_TY1_2_ not in S288c	S288c	Chr15	354573	1	yjm1447,
LTR_TY1_2_ not in S288c	S288c	Chr15	437527	8	yjm1129,yjm1381,yjm1383,yjm1387,yjm1415,yjm1526,yjm1549,yjm470,
LTR_TY1_2_ not in S288c	S288c	Chr15	437591	1	yjm248,
LTR_TY1_2_ not in S288c	S288c	Chr15	437771	4	yjm1304,yjm1311,yjm1450,yjm1478,
LTR_TY1_2_ not in S288c	S288c	Chr15	437988	1	yjm1355,
LTR_TY1_2_ not in S288c	S288c	Chr15	438060	6	yjm1332,yjm1419,yjm1443,yjm1444,yjm451,yjm693,
LTR_TY1_2_ not in S288c	S288c	Chr15	438192	4	yjm1326,yjm1388,yjm1399,yjm1463,
LTR_TY1_2_ not in S288c	S288c	Chr15	438304	4	yjm1400,yjm1419,yjm1479,yjm456,
LTR_TY1_2_ not in S288c	S288c	Chr15	462410	47	yjm1078,yjm1129,yjm1199,yjm1242,yjm1250,yjm1304,yjm1326,yjm1332,yjm1336,yjm1341,yjm1355,yjm1356,yjm1381,yjm1385,yjm1386,yjm1387,yjm1415,yjm1417,yjm1433,yjm1450,yjm1477,yjm1478,yjm1526,yjm189,yjm193,yjm244,yjm270,yjm271,yjm320,yjm326,yjm428,yjm450,yjm541,yjm555,yjm627,yjm682,yjm683,yjm693,yjm969,yjm975,yjm978,yjm981,yjm984,yjm987,yjm990,yjm993,yjm996,
LTR_TY1_2_ not in S288c	S288c	Chr15	464003	1	yjm1447,
LTR_TY1_2_ not in S288c	S288c	Chr15	464077	6	yjm1248,yjm1400,yjm1439,yjm1460,yjm1479,yjm270,
LTR_TY1_2_ not in S288c	S288c	Chr15	486938	3	yjm326,yjm451,yjm683,
LTR_TY1_2_ not in S288c	S288c	Chr15	487236	1	yjm1383,
LTR_TY1_2_ not in S288c	S288c	Chr15	487258	1	yjm428,
LTR_TY1_2_ not in S288c	S288c	Chr15	571142	1	yjm1381,
LTR_TY1_2_ not in S288c	S288c	Chr15	571285	9	yjm1248,yjm1273,yjm1402,yjm1434,yjm1439,yjm1573,yjm195,yjm450,yjm627,
LTR_TY1_2_ not in S288c	S288c	Chr15	571537	3	yjm1129,yjm1383,yjm1526,
LTR_TY1_2_ not in S288c	S288c	Chr15	571570	1	yjm1615,
LTR_TY1_2_ not in S288c	S288c	Chr15	571579	3	yjm1418,yjm1444,yjm1526,
LTR_TY1_2_ not in S288c	S288c	Chr15	571860	1	yjm1202,
LTR_TY1_2_ not in S288c	S288c	Chr15	575098	1	yjm1385,
LTR_TY1_2_ not in S288c	S288c	Chr15	577297	3	yjm1326,yjm1385,yjm1386,
LTR_TY1_2_ not in S288c	S288c	Chr15	594299	4	yjm1342,yjm248,yjm271,yjm554,
LTR_TY1_2_ not in S288c	S288c	Chr15	594370	10	yjm1273,yjm1355,yjm1389,yjm1434,yjm1439,yjm1592,yjm1615,yjm195,yjm627,yjm693,
LTR_TY1_2_ not in S288c	S288c	Chr15	594472	3	yjm320,yjm326,yjm682,
LTR_TY1_2_ not in S288c	S288c	Chr15	594523	4	yjm1083,yjm1307,yjm1447,yjm271,
LTR_TY1_2_ not in S288c	S288c	Chr15	594595	1	yjm554,
LTR_TY1_2_ not in S288c	S288c	Chr15	594614	1	yjm1248,
LTR_TY1_2_ not in S288c	S288c	Chr15	594668	9	yjm1415,yjm972,yjm975,yjm978,yjm984,yjm987,yjm990,yjm993,yjm996,
LTR_TY1_2_ not in S288c	S288c	Chr15	595398	1	yjm1248,
LTR_TY1_2_ not in S288c	S288c	Chr15	595398	1	yjm1417,
LTR_TY1_2_ not in S288c	S288c	Chr15	599666	1	yjm1083,
LTR_TY1_2_ not in S288c	S288c	Chr15	599703	1	yjm1450,
LTR_TY1_2_ not in S288c	S288c	Chr15	600124	2	yjm1342,yjm1450,
LTR_TY1_2_ not in S288c	S288c	Chr15	600484	1	yjm1478,
LTR_TY1_2_ not in S288c	S288c	Chr15	600544	1	yjm1479,
LTR_TY1_2_ not in S288c	S288c	Chr15	600878	2	yjm981,yjm987,
LTR_TY1_2_ not in S288c	S288c	Chr15	663728	1	yjm1447,
LTR_TY1_2_ not in S288c	S288c	Chr15	663756	3	yjm1273,yjm1419,yjm1434,
LTR_TY1_2_ not in S288c	S288c	Chr15	663807	2	yjm1248,yjm428,
LTR_TY1_2_ not in S288c	S288c	Chr15	664037	1	yjm1252,
LTR_TY1_2_ not in S288c	S288c	Chr15	664054	1	yjm1248,
LTR_TY1_2_ not in S288c	S288c	Chr15	677047	1	yjm975,
LTR_TY1_2_ not in S288c	S288c	Chr15	702749	1	yjm1341,
LTR_TY1_2_ not in S288c	S288c	Chr15	703461	1	yjm1447,
LTR_TY1_2_ not in S288c	S288c	Chr15	703560	7	yjm1202,yjm1208,yjm1385,yjm1399,yjm1450,yjm428,yjm456,
LTR_TY1_2_ not in S288c	S288c	Chr15	703728	7	yjm1202,yjm1208,yjm1326,yjm1385,yjm541,yjm554,yjm683,
LTR_TY1_2_ not in S288c	S288c	Chr15	706880	2	yjm1202,yjm1401,
LTR_TY1_2_ not in S288c	S288c	Chr15	707204	1	yjm1385,
LTR_TY1_2_ not in S288c	S288c	Chr15	707926	1	yjm1202,
LTR_TY1_2_ not in S288c	S288c	Chr15	708368	1	yjm1479,
LTR_TY1_2_ not in S288c	S288c	Chr15	710025	1	yjm1202,
LTR_TY1_2_ not in S288c	S288c	Chr15	710025	1	yjm1342,
LTR_TY1_2_ not in S288c	S288c	Chr15	710109	1	yjm1478,
LTR_TY1_2_ not in S288c	S288c	Chr15	710184	1	yjm1399,
LTR_TY1_2_ not in S288c	S288c	Chr15	847966	1	yjm195,
LTR_TY1_2_ not in S288c	S288c	Chr15	854125	9	yjm1248,yjm1381,yjm1439,yjm1460,yjm1526,yjm195,yjm451,yjm555,yjm627,
LTR_TY1_2_ not in S288c	S288c	Chr15	922873	1	yjm1401,
LTR_TY1_2_ not in S288c	S288c	Chr15	969815	2	yjm1307,yjm1326,
LTR_TY1_2_ not in S288c	S288c	Chr15	971724	1	yjm682,
LTR_TY1_2_ not in S288c	S288c	Chr15	973350	1	yjm1381,
LTR_TY1_2_ not in S288c	S288c	Chr15	974647	1	yjm450,
LTR_TY1_2_ not in S288c	S288c	Chr15	979166	1	yjm541,
LTR_TY1_2_ not in S288c	S288c	Chr15	979484	2	yjm1356,yjm683,
LTR_TY1_2_ not in S288c	S288c	Chr15	979780	1	yjm1444,
LTR_TY1_2_ not in S288c	S288c	Chr15	979836	3	yjm1248,yjm1439,yjm627,
LTR_TY1_2_ not in S288c	S288c	Chr15	980591	1	yjm1399,
LTR_TY1_2_ not in S288c	S288c	Chr15	1058693	2	yjm555,yjm681,
LTR_TY1_2_ not in S288c	S288c	Chr16	56108	2	yjm1273,yjm1447,
LTR_TY1_2_ not in S288c	S288c	Chr16	56111	1	yjm195,
LTR_TY1_2_ not in S288c	S288c	Chr16	56117	15	yjm1083,yjm1244,yjm1250,yjm1332,yjm1341,yjm1355,yjm1383,yjm1386,yjm1418,yjm193,yjm270,yjm271,yjm693,yjm975,yjm984,
LTR_TY1_2_ not in S288c	S288c	Chr16	56138	4	yjm1208,yjm1443,yjm451,yjm681,
LTR_TY1_2_ not in S288c	S288c	Chr16	56160	21	yjm1078,yjm1202,yjm1242,yjm1252,yjm1307,yjm1311,yjm1326,yjm1338,yjm1415,yjm1417,yjm1444,yjm1450,yjm1477,yjm244,yjm248,yjm428,yjm453,yjm456,yjm627,yjm990,yjm993,
LTR_TY1_2_ not in S288c	S288c	Chr16	56163	4	yjm1400,yjm1401,yjm1463,yjm1479,
LTR_TY1_2_ not in S288c	S288c	Chr16	56185	10	yjm1304,yjm1336,yjm1381,yjm1385,yjm1433,yjm1460,yjm1527,yjm326,yjm682,yjm683,
LTR_TY1_2_ not in S288c	S288c	Chr16	56263	1	yjm1573,
LTR_TY1_2_ not in S288c	S288c	Chr16	56285	8	yjm1199,yjm1248,yjm1387,yjm1388,yjm1389,yjm1478,yjm1592,yjm689,
LTR_TY1_2_ not in S288c	S288c	Chr16	56451	1	yjm195,
LTR_TY1_2_ not in S288c	S288c	Chr16	56465	1	yjm195,
LTR_TY1_2_ not in S288c	S288c	Chr16	56880	1	yjm1342,
LTR_TY1_2_ not in S288c	S288c	Chr16	57421	2	yjm1385,yjm450,
LTR_TY1_2_ not in S288c	S288c	Chr16	59124	7	yjm1133,yjm1190,yjm1248,yjm1342,yjm1463,yjm320,yjm541,
LTR_TY1_2_ not in S288c	S288c	Chr16	61151	2	yjm1336,yjm554,
LTR_TY1_2_ not in S288c	S288c	Chr16	62426	2	yjm1336,yjm1527,
LTR_TY1_2_ not in S288c	S288c	Chr16	62717	2	yjm1311,yjm1615,
LTR_TY1_2_ not in S288c	S288c	Chr16	63065	1	yjm193,
LTR_TY1_2_ not in S288c	S288c	Chr16	63298	20	yjm1083,yjm1199,yjm1248,yjm1273,yjm1342,yjm1355,yjm1383,yjm1386,yjm1400,yjm1401,yjm1418,yjm1434,yjm1439,yjm1463,yjm1479,yjm195,yjm271,yjm450,yjm541,yjm693,
LTR_TY1_2_ not in S288c	S288c	Chr16	64013	1	yjm1338,
LTR_TY1_2_ not in S288c	S288c	Chr16	96182	1	yjm270,
LTR_TY1_2_ not in S288c	S288c	Chr16	162045	1	yjm1389,
LTR_TY1_2_ not in S288c	S288c	Chr16	210057	7	yjm1078,yjm1248,yjm1311,yjm1355,yjm1439,yjm248,yjm627,
LTR_TY1_2_ not in S288c	S288c	Chr16	210120	3	yjm1400,yjm1479,yjm450,
LTR_TY1_2_ not in S288c	S288c	Chr16	210212	3	yjm1248,yjm1439,yjm627,
LTR_TY1_2_ not in S288c	S288c	Chr16	210436	5	yjm1244,yjm1252,yjm1356,yjm1386,yjm428,
LTR_TY1_2_ not in S288c	S288c	Chr16	210645	1	yjm195,
LTR_TY1_2_ not in S288c	S288c	Chr16	338768	5	yjm1248,yjm1304,yjm1417,yjm1439,yjm270,
LTR_TY1_2_ not in S288c	S288c	Chr16	339376	1	yjm1342,
LTR_TY1_2_ not in S288c	S288c	Chr16	339403	1	yjm1248,
LTR_TY1_2_ not in S288c	S288c	Chr16	377331	1	yjm554,
LTR_TY1_2_ not in S288c	S288c	Chr16	436066	3	yjm1250,yjm1252,yjm1332,
LTR_TY1_2_ not in S288c	S288c	Chr16	436968	2	yjm1401,yjm1479,
LTR_TY1_2_ not in S288c	S288c	Chr16	543950	1	yjm693,
LTR_TY1_2_ not in S288c	S288c	Chr16	560608	1	yjm627,
LTR_TY1_2_ not in S288c	S288c	Chr16	561040	3	yjm1439,yjm1478,yjm1527,
LTR_TY1_2_ not in S288c	S288c	Chr16	561075	2	yjm1450,yjm320,
LTR_TY1_2_ not in S288c	S288c	Chr16	561104	1	yjm248,
LTR_TY1_2_ not in S288c	S288c	Chr16	571752	1	yjm1342,
LTR_TY1_2_ not in S288c	S288c	Chr16	571776	3	yjm1248,yjm1252,yjm1304,
LTR_TY1_2_ not in S288c	S288c	Chr16	572094	1	yjm320,
LTR_TY1_2_ not in S288c	S288c	Chr16	581579	2	yjm1304,yjm428,
LTR_TY1_2_ not in S288c	S288c	Chr16	581877	1	yjm1304,
LTR_TY1_2_ not in S288c	S288c	Chr16	622846	1	yjm1444,
LTR_TY1_2_ not in S288c	S288c	Chr16	678410	1	yjm1389,
LTR_TY1_2_ not in S288c	S288c	Chr16	688904	1	yjm1447,
LTR_TY1_2_ not in S288c	S288c	Chr16	689033	5	yjm1341,yjm1355,yjm1478,yjm320,yjm681,
LTR_TY1_2_ not in S288c	S288c	Chr16	689545	1	yjm1250,
LTR_TY1_2_ not in S288c	S288c	Chr16	743623	1	yjm1381,
LTR_TY1_2_ not in S288c	S288c	Chr16	743712	2	yjm555,yjm681,
LTR_TY1_2_ not in S288c	S288c	Chr16	743799	8	yjm1129,yjm1244,yjm1526,yjm428,yjm451,yjm541,yjm554,yjm683,
LTR_TY1_2_ not in S288c	S288c	Chr16	743956	1	yjm555,
LTR_TY1_2_ not in S288c	S288c	Chr16	744152	5	yjm1129,yjm1355,yjm541,yjm554,yjm683,
LTR_TY1_2_ not in S288c	S288c	Chr16	744268	2	yjm1248,yjm627,
LTR_TY1_2_ not in S288c	S288c	Chr16	769094	2	yjm1419,yjm1450,
LTR_TY1_2_ not in S288c	S288c	Chr16	769331	7	yjm1307,yjm1400,yjm1433,yjm1478,yjm1479,yjm248,yjm689,
LTR_TY1_2_ not in S288c	S288c	Chr16	770005	2	yjm541,yjm554,
LTR_TY1_2_ not in S288c	S288c	Chr16	775660	2	yjm1304,yjm1444,
LTR_TY1_2_ not in S288c	S288c	Chr16	775701	7	yjm1208,yjm1439,yjm1615,yjm428,yjm451,yjm554,yjm683,
LTR_TY1_2_ not in S288c	S288c	Chr16	775866	4	yjm1443,yjm1447,yjm195,yjm470,
LTR_TY1_2_ not in S288c	S288c	Chr16	775944	8	yjm1078,yjm1248,yjm1389,yjm1574,yjm1592,yjm270,yjm627,yjm683,
LTR_TY1_2_ not in S288c	S288c	Chr16	776750	1	yjm1190,
LTR_TY1_2_ not in S288c	S288c	Chr16	804081	2	yjm1304,yjm1342,
LTR_TY1_2_ not in S288c	S288c	Chr16	804225	2	yjm1400,yjm1479,
LTR_TY1_2_ not in S288c	S288c	Chr16	804325	3	yjm1342,yjm555,yjm681,
LTR_TY1_2_ not in S288c	S288c	Chr16	804978	1	yjm320,
LTR_TY1_2_ not in S288c	S288c	Chr16	805255	1	yjm555,
LTR_TY1_2_ not in S288c	S288c	Chr16	807374	1	yjm470,
LTR_TY1_2_ not in S288c	S288c	Chr16	810051	1	yjm683,
LTR_TY1_2_ not in S288c	S288c	Chr16	810229	1	yjm453,
LTR_TY1_2_ not in S288c	S288c	Chr16	810563	1	yjm450,
LTR_TY1_2_ not in S288c	S288c	Chr16	818978	2	yjm1355,yjm1418,
LTR_TY1_2_ not in S288c	S288c	Chr16	819153	2	yjm326,yjm682,
LTR_TY1_2_ not in S288c	S288c	Chr16	819163	15	yjm1083,yjm1250,yjm1311,yjm1355,yjm1381,yjm1385,yjm1386,yjm1388,yjm1389,yjm1419,yjm1450,yjm1460,yjm1592,yjm450,yjm456,
LTR_TY1_2_ not in S288c	S288c	Chr16	837967	1	yjm1385,
LTR_TY1_2_ not in S288c	S288c	Chr16	838863	4	yjm1248,yjm1385,yjm1419,yjm451,
LTR_TY1_2_ not in S288c	S288c	Chr16	844129	3	yjm1400,yjm1401,yjm1479,
LTR_TY1_2_ not in S288c	S288c	Chr16	850851	1	yjm320,
LTR_TY1_2_ not in S288c	S288c	Chr16	853450	1	yjm1443,
LTR_TY1_2_ not in S288c	S288c	Chr16	854679	1	yjm1443,
LTR_TY1_2_ not in S288c	S288c	Chr16	856555	2	yjm1252,yjm451,
LTR_TY1_2_ not in S288c	S288c	Chr16	856555	5	yjm1447,yjm270,yjm326,yjm683,yjm693,
LTR_TY1_2_ not in S288c	S288c	Chr16	856602	1	yjm450,
LTR_TY1_2_ not in S288c	S288c	Chr16	856604	2	yjm1078,yjm1338,
LTR_TY1_2_ not in S288c	S288c	Chr16	856622	8	yjm1385,yjm1450,yjm1463,yjm326,yjm541,yjm554,yjm683,yjm693,
LTR_TY1_2_ not in S288c	S288c	Chr16	856632	4	yjm1199,yjm1202,yjm1250,yjm1341,
LTR_TY1_2_ not in S288c	S288c	Chr16	856648	1	yjm470,
LTR_TY1_2_ not in S288c	S288c	Chr16	856741	1	yjm1444,
LTR_TY1_2_ not in S288c	S288c	Chr16	856886	2	yjm1248,yjm195,
LTR_TY1_2_ not in S288c	S288c	Chr16	859691	1	yjm1463,
LTR_TY1_2_ not in S288c	S288c	Chr16	859733	3	yjm1248,yjm1439,yjm627,
LTR_TY1_2_ not in S288c	S288c	Chr16	860024	1	yjm1355,
LTR_TY1_2_ not in S288c	S288c	Chr16	880155	1	yjm195,
LTR_TY1_2_ not in S288c	S288c	Chr16	880212	1	yjm320,
LTR_TY1_2_ not in S288c	S288c	Chr16	880239	5	yjm1248,yjm1342,yjm1439,yjm195,yjm627,
LTR_TY1_2_ not in S288c	S288c	Chr16	881021	1	yjm1443,
LTR_TY1_2_ not in S288c	S288c	Chr16	881361	1	yjm1083,
LTR_TY1_2_ not in S288c	S288c	Chr16	940898	2	yjm1248,yjm1439,
LTR_TY1_2_ not in S288c	S288c	Chr16	942446	1	yjm1199,
	LTR_TY3 not in S288c	Chromosome	coordinates in S288c	1	Strains,
LTR_TY3 not in S288c	S288c	Chr01	138841	1	yjm195,
LTR_TY3 not in S288c	S288c	Chr01	139135	1	yjm1342,
LTR_TY3 not in S288c	S288c	Chr01	166251	1	yjm1447,
LTR_TY3 not in S288c	S288c	Chr01	181124	6	yjm693,yjm972,yjm975,yjm978,yjm990,yjm996,
LTR_TY3 not in S288c	S288c	Chr01	189286	1	yjm1342,
LTR_TY3 not in S288c	S288c	Chr01	189464	1	yjm470,
LTR_TY3 not in S288c	S288c	Chr02	36384	1	yjm1418,
LTR_TY3 not in S288c	S288c	Chr02	197185	2	yjm1342,yjm1444,
LTR_TY3 not in S288c	S288c	Chr02	197776	1	yjm1342,
LTR_TY3 not in S288c	S288c	Chr02	197931	1	yjm320,
LTR_TY3 not in S288c	S288c	Chr02	198021	1	yjm1342,
LTR_TY3 not in S288c	S288c	Chr02	198054	1	yjm1133,
LTR_TY3 not in S288c	S288c	Chr02	198054	1	yjm1199,
LTR_TY3 not in S288c	S288c	Chr02	198054	12	yjm1273,yjm1342,yjm1383,yjm1418,yjm1434,yjm1527,yjm1549,yjm320,yjm326,yjm555,yjm681,yjm683,
LTR_TY3 not in S288c	S288c	Chr02	266360	1	yjm1273,
LTR_TY3 not in S288c	S288c	Chr02	266360	1	yjm1434,
LTR_TY3 not in S288c	S288c	Chr02	326875	1	yjm1342,
LTR_TY3 not in S288c	S288c	Chr02	347291	5	yjm1199,yjm1444,yjm1527,yjm555,yjm681,
LTR_TY3 not in S288c	S288c	Chr02	347585	1	yjm1418,
LTR_TY3 not in S288c	S288c	Chr02	642792	3	yjm1133,yjm1444,yjm681,
LTR_TY3 not in S288c	S288c	Chr02	644855	6	yjm1133,yjm1444,yjm1549,yjm320,yjm326,yjm681,
LTR_TY3 not in S288c	S288c	Chr02	645149	1	yjm683,
LTR_TY3 not in S288c	S288c	Chr03	90843	22	yjm1078,yjm1129,yjm1242,yjm1326,yjm1341,yjm1356,yjm1387,yjm1417,yjm1450,yjm1477,yjm1574,yjm193,yjm244,yjm453,yjm555,yjm681,yjm972,yjm978,yjm987,yjm990,yjm993,yjm996,
LTR_TY3 not in S288c	S288c	Chr03	94051	1	yjm1332,
LTR_TY3 not in S288c	S288c	Chr03	142490	1	yjm1450,
LTR_TY3 not in S288c	S288c	Chr03	149904	1	yjm689,
LTR_TY3 not in S288c	S288c	Chr03	168091	34	yjm1078,yjm1129,yjm1242,yjm1311,yjm1326,yjm1341,yjm1355,yjm1356,yjm1381,yjm1383,yjm1386,yjm1387,yjm1417,yjm1433,yjm1477,yjm1574,yjm193,yjm244,yjm271,yjm326,yjm451,yjm453,yjm681,yjm689,yjm693,yjm969,yjm972,yjm975,yjm978,yjm981,yjm987,yjm990,yjm993,yjm996,
LTR_TY3 not in S288c	S288c	Chr03	172430	1	yjm1332,
LTR_TY3 not in S288c	S288c	Chr04	83531	5	yjm1248,yjm1439,yjm1549,yjm1615,yjm470,
LTR_TY3 not in S288c	S288c	Chr04	434058	1	yjm1385,
LTR_TY3 not in S288c	S288c	Chr04	437149	1	yjm451,
LTR_TY3 not in S288c	S288c	Chr04	437756	2	yjm1450,yjm470,
LTR_TY3 not in S288c	S288c	Chr04	488589	2	yjm1401,yjm1460,
LTR_TY3 not in S288c	S288c	Chr04	513558	1	yjm195,
LTR_TY3 not in S288c	S288c	Chr04	513689	1	yjm1400,
LTR_TY3 not in S288c	S288c	Chr04	519648	1	yjm1419,
LTR_TY3 not in S288c	S288c	Chr04	519725	2	yjm1202,yjm1439,
LTR_TY3 not in S288c	S288c	Chr04	520661	1	yjm193,
LTR_TY3 not in S288c	S288c	Chr04	520769	1	yjm1248,
LTR_TY3 not in S288c	S288c	Chr04	620062	4	yjm1083,yjm1419,yjm1615,yjm428,
LTR_TY3 not in S288c	S288c	Chr04	645522	1	yjm1400,
LTR_TY3 not in S288c	S288c	Chr04	668096	1	yjm193,
LTR_TY3 not in S288c	S288c	Chr04	980770	3	yjm1400,yjm1479,yjm195,
LTR_TY3 not in S288c	S288c	Chr04	992815	1	yjm693,
LTR_TY3 not in S288c	S288c	Chr04	1016996	2	yjm1355,yjm1447,
LTR_TY3 not in S288c	S288c	Chr04	1016996	3	yjm1549,yjm470,yjm683,
LTR_TY3 not in S288c	S288c	Chr04	1017291	5	yjm1083,yjm326,yjm428,yjm682,yjm683,
LTR_TY3 not in S288c	S288c	Chr04	1095179	1	yjm1434,
LTR_TY3 not in S288c	S288c	Chr04	1095179	3	yjm1248,yjm1439,yjm195,
LTR_TY3 not in S288c	S288c	Chr04	1095474	3	yjm1383,yjm1400,yjm1479,
LTR_TY3 not in S288c	S288c	Chr04	1150657	1	yjm1447,
LTR_TY3 not in S288c	S288c	Chr04	1175648	9	yjm1202,yjm1385,yjm1401,yjm1549,yjm450,yjm451,yjm470,yjm555,yjm683,
LTR_TY3 not in S288c	S288c	Chr04	1256796	5	yjm1133,yjm320,yjm450,yjm541,yjm554,
LTR_TY3 not in S288c	S288c	Chr04	1352676	1	yjm1549,
LTR_TY3 not in S288c	S288c	Chr04	1461546	2	yjm1447,yjm1460,
LTR_TY3 not in S288c	S288c	Chr04	1461546	31	yjm1083,yjm1133,yjm1202,yjm1242,yjm1332,yjm1336,yjm1341,yjm1355,yjm1356,yjm1383,yjm1385,yjm1387,yjm1450,yjm1477,yjm1615,yjm270,yjm326,yjm450,yjm453,yjm681,yjm682,yjm683,yjm693,yjm972,yjm978,yjm981,yjm984,yjm987,yjm990,yjm993,yjm996,
LTR_TY3 not in S288c	S288c	Chr04	1461841	2	yjm1355,yjm1574,
LTR_TY3 not in S288c	S288c	Chr05	130870	2	yjm1549,yjm470,
LTR_TY3 not in S288c	S288c	Chr05	131155	2	yjm555,yjm681,
LTR_TY3 not in S288c	S288c	Chr05	135217	3	yjm1389,yjm1460,yjm1592,
LTR_TY3 not in S288c	S288c	Chr05	138355	3	yjm1386,yjm555,yjm681,
LTR_TY3 not in S288c	S288c	Chr05	207341	4	yjm1338,yjm1400,yjm1479,yjm456,
LTR_TY3 not in S288c	S288c	Chr05	207042	30	yjm1208,yjm1244,yjm1250,yjm1326,yjm1332,yjm1336,yjm1356,yjm1415,yjm1417,yjm1463,yjm1478,yjm1526,yjm1549,yjm1574,yjm189,yjm193,yjm244,yjm270,yjm271,yjm451,yjm453,yjm681,yjm969,yjm972,yjm978,yjm981,yjm987,yjm990,yjm993,yjm996,
LTR_TY3 not in S288c	S288c	Chr05	431748	1	yjm1400,
LTR_TY3 not in S288c	S288c	Chr05	434974	2	yjm1385,yjm193,
LTR_TY3 not in S288c	S288c	Chr05	442992	3	yjm1250,yjm1381,yjm1386,
LTR_TY3 not in S288c	S288c	Chr05	442993	1	yjm271,
LTR_TY3 not in S288c	S288c	Chr05	469146	1	yjm1190,
LTR_TY3 not in S288c	S288c	Chr05	492139	3	yjm1190,yjm1385,yjm1401,
LTR_TY3 not in S288c	S288c	Chr05	551075	2	yjm1402,yjm1573,
LTR_TY3 not in S288c	S288c	Chr06	101065	3	yjm1326,yjm554,yjm969,
LTR_TY3 not in S288c	S288c	Chr06	101360	2	yjm1202,yjm1444,
LTR_TY3 not in S288c	S288c	Chr06	101360	2	yjm1402,yjm1573,
LTR_TY3 not in S288c	S288c	Chr06	157726	3	yjm1083,yjm1133,yjm1386,
LTR_TY3 not in S288c	S288c	Chr06	180758	4	yjm1443,yjm326,yjm682,yjm683,
LTR_TY3 not in S288c	S288c	Chr06	180761	4	yjm1326,yjm1444,yjm450,yjm554,
LTR_TY3 not in S288c	S288c	Chr06	204691	6	yjm1083,yjm1202,yjm1386,yjm326,yjm683,yjm969,
LTR_TY3 not in S288c	S288c	Chr06	205929	1	yjm1386,
LTR_TY3 not in S288c	S288c	Chr07	73599	1	yjm969,
LTR_TY3 not in S288c	S288c	Chr07	73616	2	yjm1401,yjm450,
LTR_TY3 not in S288c	S288c	Chr07	73616	25	yjm1248,yjm1304,yjm1332,yjm1336,yjm1338,yjm1439,yjm1526,yjm1527,yjm189,yjm195,yjm326,yjm428,yjm453,yjm456,yjm554,yjm555,yjm627,yjm681,yjm683,yjm972,yjm978,yjm987,yjm990,yjm993,yjm996,
LTR_TY3 not in S288c	S288c	Chr07	110411	2	yjm1401,yjm450,
LTR_TY3 not in S288c	S288c	Chr07	205209	3	yjm1388,yjm1389,yjm1592,
LTR_TY3 not in S288c	S288c	Chr07	319123	1	yjm1342,
LTR_TY3 not in S288c	S288c	Chr07	319762	1	yjm1342,
LTR_TY3 not in S288c	S288c	Chr07	323347	4	yjm1248,yjm1439,yjm195,yjm627,
LTR_TY3 not in S288c	S288c	Chr07	328576	2	yjm189,yjm453,
LTR_TY3 not in S288c	S288c	Chr07	401317	42	yjm1129,yjm1248,yjm1304,yjm1311,yjm1332,yjm1336,yjm1338,yjm1342,yjm1383,yjm1388,yjm1389,yjm1400,yjm1401,yjm1439,yjm1443,yjm1478,yjm1479,yjm1526,yjm1527,yjm1549,yjm1592,yjm189,yjm195,yjm326,yjm428,yjm450,yjm453,yjm456,yjm541,yjm554,yjm555,yjm681,yjm683,yjm689,yjm693,yjm969,yjm972,yjm978,yjm987,yjm990,yjm993,yjm996,
LTR_TY3 not in S288c	S288c	Chr07	422781	8	yjm1129,yjm1332,yjm1336,yjm1383,yjm1526,yjm189,yjm195,yjm693,
LTR_TY3 not in S288c	S288c	Chr07	422781	4	yjm1129,yjm1342,yjm1400,yjm1479,
LTR_TY3 not in S288c	S288c	Chr07	554930	2	yjm1389,yjm1592,
LTR_TY3 not in S288c	S288c	Chr07	561460	25	yjm1129,yjm1304,yjm1311,yjm1332,yjm1336,yjm1383,yjm1388,yjm1478,yjm1526,yjm189,yjm326,yjm428,yjm450,yjm453,yjm541,yjm554,yjm555,yjm627,yjm683,yjm972,yjm978,yjm987,yjm990,yjm993,yjm996,
LTR_TY3 not in S288c	S288c	Chr07	561461	4	yjm1338,yjm1443,yjm1527,yjm456,
LTR_TY3 not in S288c	S288c	Chr07	561914	1	yjm195,
LTR_TY3 not in S288c	S288c	Chr07	566167	1	yjm693,
LTR_TY3 not in S288c	S288c	Chr07	567022	1	yjm693,
LTR_TY3 not in S288c	S288c	Chr07	567761	1	yjm1383,
LTR_TY3 not in S288c	S288c	Chr07	731121	3	yjm1388,yjm1389,yjm1592,
LTR_TY3 not in S288c	S288c	Chr07	794106	9	yjm1248,yjm1311,yjm1439,yjm1549,yjm195,yjm326,yjm456,yjm627,yjm683,
LTR_TY3 not in S288c	S288c	Chr07	813734	1	yjm554,
LTR_TY3 not in S288c	S288c	Chr07	817374	2	yjm1389,yjm1592,
LTR_TY3 not in S288c	S288c	Chr07	823313	9	yjm1248,yjm1304,yjm1439,yjm195,yjm326,yjm456,yjm541,yjm627,yjm683,
LTR_TY3 not in S288c	S288c	Chr07	845630	1	yjm1342,
LTR_TY3 not in S288c	S288c	Chr07	875957	2	yjm1248,yjm1439,
LTR_TY3 not in S288c	S288c	Chr07	876129	4	yjm1248,yjm1439,yjm195,yjm627,
LTR_TY3 not in S288c	S288c	Chr07	930736	5	yjm1311,yjm1419,yjm541,yjm554,yjm693,
LTR_TY3 not in S288c	S288c	Chr08	85088	3	yjm1401,yjm1419,yjm451,
LTR_TY3 not in S288c	S288c	Chr08	85575	1	yjm693,
LTR_TY3 not in S288c	S288c	Chr08	91462	1	yjm1401,
LTR_TY3 not in S288c	S288c	Chr08	116459	1	yjm1443,
LTR_TY3 not in S288c	S288c	Chr08	132822	15	yjm1273,yjm1419,yjm1434,yjm1527,yjm326,yjm428,yjm451,yjm453,yjm456,yjm693,yjm972,yjm978,yjm984,yjm990,yjm993,
LTR_TY3 not in S288c	S288c	Chr08	146031	14	yjm1419,yjm1443,yjm1527,yjm326,yjm450,yjm451,yjm453,yjm456,yjm693,yjm972,yjm978,yjm984,yjm990,yjm993,
LTR_TY3 not in S288c	S288c	Chr08	237652	2	yjm1248,yjm195,
LTR_TY3 not in S288c	S288c	Chr08	358286	3	yjm1248,yjm1443,yjm195,
LTR_TY3 not in S288c	S288c	Chr08	388706	9	yjm326,yjm450,yjm451,yjm453,yjm972,yjm978,yjm984,yjm990,yjm993,
LTR_TY3 not in S288c	S288c	Chr08	388712	1	yjm1419,
LTR_TY3 not in S288c	S288c	Chr08	466975	6	yjm1273,yjm1401,yjm1434,yjm1443,yjm326,yjm456,
LTR_TY3 not in S288c	S288c	Chr08	475491	1	yjm195,
LTR_TY3 not in S288c	S288c	Chr09	175015	1	yjm693,
LTR_TY3 not in S288c	S288c	Chr09	196723	1	yjm1388,
LTR_TY3 not in S288c	S288c	Chr09	196729	1	yjm1388,
LTR_TY3 not in S288c	S288c	Chr09	210802	1	yjm1433,
LTR_TY3 not in S288c	S288c	Chr09	232293	1	yjm1133,
LTR_TY3 not in S288c	S288c	Chr09	234062	1	yjm1133,
LTR_TY3 not in S288c	S288c	Chr09	248539	4	yjm326,yjm682,yjm683,yjm693,
LTR_TY3 not in S288c	S288c	Chr09	324090	1	yjm193,
LTR_TY3 not in S288c	S288c	Chr09	324091	9	yjm1417,yjm1526,yjm428,yjm627,yjm978,yjm981,yjm990,yjm993,yjm996,
LTR_TY3 not in S288c	S288c	Chr09	325732	3	yjm1417,yjm984,yjm996,
LTR_TY3 not in S288c	S288c	Chr09	325732	3	yjm195,yjm326,yjm451,
LTR_TY3 not in S288c	S288c	Chr09	325887	1	yjm1433,
LTR_TY3 not in S288c	S288c	Chr09	331529	1	yjm1133,
LTR_TY3 not in S288c	S288c	Chr09	336136	2	yjm193,yjm693,
LTR_TY3 not in S288c	S288c	Chr10	58883	3	yjm1311,yjm1444,yjm456,
LTR_TY3 not in S288c	S288c	Chr10	197099	14	yjm1083,yjm1190,yjm1199,yjm1250,yjm1304,yjm1311,yjm1444,yjm1450,yjm193,yjm195,yjm320,yjm456,yjm541,yjm555,
LTR_TY3 not in S288c	S288c	Chr10	203398	2	yjm1460,yjm555,
LTR_TY3 not in S288c	S288c	Chr10	203793	2	yjm1250,yjm193,
LTR_TY3 not in S288c	S288c	Chr10	204109	2	yjm1311,yjm1450,
LTR_TY3 not in S288c	S288c	Chr10	204718	6	yjm1190,yjm1199,yjm1304,yjm1444,yjm320,yjm541,
LTR_TY3 not in S288c	S288c	Chr10	374294	2	yjm1083,yjm1450,
LTR_TY3 not in S288c	S288c	Chr10	374590	1	yjm193,
LTR_TY3 not in S288c	S288c	Chr10	415752	1	yjm195,
LTR_TY3 not in S288c	S288c	Chr10	472462	1	yjm1444,
LTR_TY3 not in S288c	S288c	Chr10	517602	1	yjm555,
LTR_TY3 not in S288c	S288c	Chr10	524105	1	yjm1250,
LTR_TY3 not in S288c	S288c	Chr10	541493	1	yjm1460,
LTR_TY3 not in S288c	S288c	Chr10	617608	1	yjm1250,
LTR_TY3 not in S288c	S288c	Chr11	74313	6	yjm1248,yjm1273,yjm1419,yjm1434,yjm1439,yjm1460,
LTR_TY3 not in S288c	S288c	Chr11	307935	2	yjm1386,yjm451,
LTR_TY3 not in S288c	S288c	Chr11	313191	2	yjm1444,yjm456,
LTR_TY3 not in S288c	S288c	Chr11	313191	2	yjm1248,yjm1439,
LTR_TY3 not in S288c	S288c	Chr11	379370	4	yjm1383,yjm1386,yjm456,yjm541,
LTR_TY3 not in S288c	S288c	Chr11	458540	7	yjm1388,yjm1389,yjm1460,yjm1592,yjm1615,yjm326,yjm683,
LTR_TY3 not in S288c	S288c	Chr12	92238	2	yjm1400,yjm1479,
LTR_TY3 not in S288c	S288c	Chr12	167743	4	yjm1400,yjm1418,yjm1479,yjm451,
LTR_TY3 not in S288c	S288c	Chr12	167744	28	yjm1083,yjm1208,yjm1273,yjm1386,yjm1400,yjm1401,yjm1418,yjm1434,yjm1450,yjm1460,yjm1478,yjm1479,yjm1549,yjm1615,yjm195,yjm320,yjm326,yjm451,yjm470,yjm541,yjm554,yjm555,yjm627,yjm682,yjm683,yjm693,yjm990,yjm996,
LTR_TY3 not in S288c	S288c	Chr12	214670	2	yjm1478,yjm451,
LTR_TY3 not in S288c	S288c	Chr12	373699	14	yjm1083,yjm1386,yjm1549,yjm320,yjm326,yjm451,yjm541,yjm554,yjm555,yjm682,yjm683,yjm693,yjm990,yjm996,
LTR_TY3 not in S288c	S288c	Chr12	374339	1	yjm627,
LTR_TY3 not in S288c	S288c	Chr12	426821	2	yjm195,yjm627,
LTR_TY3 not in S288c	S288c	Chr12	427116	2	yjm1401,yjm1450,
LTR_TY3 not in S288c	S288c	Chr12	592630	1	yjm1460,
LTR_TY3 not in S288c	S288c	Chr12	605440	2	yjm1273,yjm1434,
LTR_TY3 not in S288c	S288c	Chr12	628072	2	yjm195,yjm627,
LTR_TY3 not in S288c	S288c	Chr12	656744	1	yjm627,
LTR_TY3 not in S288c	S288c	Chr12	656744	27	yjm1083,yjm1208,yjm1273,yjm1386,yjm1400,yjm1401,yjm1418,yjm1434,yjm1450,yjm1460,yjm1478,yjm1479,yjm1549,yjm1615,yjm195,yjm320,yjm326,yjm451,yjm470,yjm541,yjm554,yjm555,yjm682,yjm683,yjm693,yjm990,yjm996,
LTR_TY3 not in S288c	S288c	Chr12	687647	9	yjm1083,yjm1450,yjm1478,yjm451,yjm541,yjm554,yjm693,yjm990,yjm996,
LTR_TY3 not in S288c	S288c	Chr12	732075	12	yjm1208,yjm1386,yjm1549,yjm1615,yjm320,yjm326,yjm470,yjm541,yjm554,yjm682,yjm683,yjm693,
LTR_TY3 not in S288c	S288c	Chr12	784048	1	yjm1478,
LTR_TY3 not in S288c	S288c	Chr12	784344	1	yjm1083,
LTR_TY3 not in S288c	S288c	Chr12	962768	2	yjm1418,yjm555,
LTR_TY3 not in S288c	S288c	Chr13	91965	5	yjm1083,yjm1433,yjm1450,yjm428,yjm470,
LTR_TY3 not in S288c	S288c	Chr13	131612	1	yjm1450,
LTR_TY3 not in S288c	S288c	Chr13	162617	1	yjm189,
LTR_TY3 not in S288c	S288c	Chr13	168343	3	yjm1400,yjm1479,yjm453,
LTR_TY3 not in S288c	S288c	Chr13	183682	26	yjm1242,yjm1244,yjm1252,yjm1336,yjm1341,yjm1356,yjm1386,yjm1387,yjm1415,yjm1477,yjm1478,yjm1526,yjm248,yjm428,yjm681,yjm693,yjm969,yjm972,yjm975,yjm978,yjm981,yjm984,yjm987,yjm990,yjm993,yjm996,
LTR_TY3 not in S288c	S288c	Chr13	183766	1	yjm453,
LTR_TY3 not in S288c	S288c	Chr13	184215	1	yjm1383,
LTR_TY3 not in S288c	S288c	Chr13	185356	2	yjm1383,yjm1386,
LTR_TY3 not in S288c	S288c	Chr13	188699	1	yjm1078,
LTR_TY3 not in S288c	S288c	Chr13	195893	1	yjm1549,
LTR_TY3 not in S288c	S288c	Chr13	258955	2	yjm1400,yjm1479,
LTR_TY3 not in S288c	S288c	Chr13	290489	1	yjm681,
LTR_TY3 not in S288c	S288c	Chr13	290783	6	yjm1311,yjm1385,yjm1400,yjm1479,yjm541,yjm682,
LTR_TY3 not in S288c	S288c	Chr13	320937	2	yjm1385,yjm1447,
LTR_TY3 not in S288c	S288c	Chr13	320937	9	yjm1248,yjm1336,yjm1386,yjm1387,yjm189,yjm195,yjm428,yjm627,yjm682,
LTR_TY3 not in S288c	S288c	Chr13	357004	1	yjm1460,
LTR_TY3 not in S288c	S288c	Chr13	363047	1	yjm1401,
LTR_TY3 not in S288c	S288c	Chr13	372234	1	yjm1418,
LTR_TY3 not in S288c	S288c	Chr13	375668	1	yjm1386,
LTR_TY3 not in S288c	S288c	Chr13	420376	2	yjm1401,yjm1450,
LTR_TY3 not in S288c	S288c	Chr13	480704	1	yjm1460,
LTR_TY3 not in S288c	S288c	Chr13	480705	4	yjm1248,yjm1401,yjm1460,yjm195,
LTR_TY3 not in S288c	S288c	Chr13	504584	3	yjm1383,yjm1400,yjm1479,
LTR_TY3 not in S288c	S288c	Chr13	504879	28	yjm1078,yjm1242,yjm1244,yjm1252,yjm1311,yjm1336,yjm1341,yjm1356,yjm1385,yjm1386,yjm1387,yjm1415,yjm1450,yjm1477,yjm1478,yjm1526,yjm1549,yjm189,yjm248,yjm682,yjm683,yjm693,yjm972,yjm975,yjm978,yjm981,yjm990,yjm993,
LTR_TY3 not in S288c	S288c	Chr13	572671	1	yjm1447,
LTR_TY3 not in S288c	S288c	Chr13	572671	3	yjm1383,yjm1385,yjm1386,
LTR_TY3 not in S288c	S288c	Chr13	600691	1	yjm1385,
LTR_TY3 not in S288c	S288c	Chr13	768152	27	yjm1078,yjm1083,yjm1242,yjm1244,yjm1252,yjm1336,yjm1341,yjm1356,yjm1387,yjm1415,yjm1477,yjm189,yjm248,yjm453,yjm541,yjm627,yjm681,yjm969,yjm972,yjm975,yjm978,yjm981,yjm984,yjm987,yjm990,yjm993,yjm996,
LTR_TY3 not in S288c	S288c	Chr13	768158	3	yjm1248,yjm1418,yjm195,
LTR_TY3 not in S288c	S288c	Chr13	768880	1	yjm972,
LTR_TY3 not in S288c	S288c	Chr13	770987	1	yjm1385,
LTR_TY3 not in S288c	S288c	Chr13	809784	1	yjm1385,
LTR_TY3 not in S288c	S288c	Chr13	837911	1	yjm1460,
LTR_TY3 not in S288c	S288c	Chr13	837912	1	yjm195,
LTR_TY3 not in S288c	S288c	Chr14	96610	1	yjm1592,
LTR_TY3 not in S288c	S288c	Chr14	96684	1	yjm450,
LTR_TY3 not in S288c	S288c	Chr14	102700	1	yjm450,
LTR_TY3 not in S288c	S288c	Chr14	374852	2	yjm1208,yjm1615,
LTR_TY3 not in S288c	S288c	Chr14	518886	2	yjm1400,yjm1479,
LTR_TY3 not in S288c	S288c	Chr14	525086	1	yjm1208,
LTR_TY3 not in S288c	S288c	Chr14	546438	1	yjm1338,
LTR_TY3 not in S288c	S288c	Chr14	560482	1	yjm428,
LTR_TY3 not in S288c	S288c	Chr14	561881	1	yjm1248,
LTR_TY3 not in S288c	S288c	Chr14	631633	1	yjm450,
LTR_TY3 not in S288c	S288c	Chr14	631636	3	yjm1389,yjm1592,yjm1615,
LTR_TY3 not in S288c	S288c	Chr14	632583	1	yjm428,
LTR_TY3 not in S288c	S288c	Chr14	632584	1	yjm1248,
LTR_TY3 not in S288c	S288c	Chr15	111046	1	yjm1401,
LTR_TY3 not in S288c	S288c	Chr15	226397	1	yjm1447,
LTR_TY3 not in S288c	S288c	Chr15	274657	1	yjm1418,
LTR_TY3 not in S288c	S288c	Chr15	288176	1	yjm195,
LTR_TY3 not in S288c	S288c	Chr15	300785	2	yjm1400,yjm1479,
LTR_TY3 not in S288c	S288c	Chr15	438332	1	yjm1342,
LTR_TY3 not in S288c	S288c	Chr15	438332	1	yjm1447,
LTR_TY3 not in S288c	S288c	Chr15	464433	2	yjm1338,yjm1381,
LTR_TY3 not in S288c	S288c	Chr15	487129	21	yjm1381,yjm1387,yjm1443,yjm1447,yjm193,yjm271,yjm453,yjm554,yjm555,yjm681,yjm682,yjm969,yjm972,yjm975,yjm978,yjm981,yjm984,yjm987,yjm990,yjm993,yjm996,
LTR_TY3 not in S288c	S288c	Chr15	490578	1	yjm1326,
LTR_TY3 not in S288c	S288c	Chr15	571647	1	yjm1443,
LTR_TY3 not in S288c	S288c	Chr15	594141	1	yjm1549,
LTR_TY3 not in S288c	S288c	Chr15	600703	1	yjm1401,
LTR_TY3 not in S288c	S288c	Chr15	663603	4	yjm1400,yjm1401,yjm1479,yjm193,
LTR_TY3 not in S288c	S288c	Chr15	707736	1	yjm554,
LTR_TY3 not in S288c	S288c	Chr15	853976	1	yjm1387,
LTR_TY3 not in S288c	S288c	Chr15	854615	1	yjm1447,
LTR_TY3 not in S288c	S288c	Chr15	857135	1	yjm1326,
LTR_TY3 not in S288c	S288c	Chr15	976403	5	yjm1326,yjm1418,yjm271,yjm554,yjm555,
LTR_TY3 not in S288c	S288c	Chr15	979095	1	yjm1326,
LTR_TY3 not in S288c	S288c	Chr15	980293	1	yjm193,
LTR_TY3 not in S288c	S288c	Chr16	55990	10	yjm1342,yjm1387,yjm1388,yjm1389,yjm1400,yjm1401,yjm1478,yjm1479,yjm1592,yjm450,
LTR_TY3 not in S288c	S288c	Chr16	56448	2	yjm195,yjm450,
LTR_TY3 not in S288c	S288c	Chr16	62692	1	yjm1078,
LTR_TY3 not in S288c	S288c	Chr16	338635	1	yjm1443,
LTR_TY3 not in S288c	S288c	Chr16	338635	1	yjm1342,
LTR_TY3 not in S288c	S288c	Chr16	435683	1	yjm1388,
LTR_TY3 not in S288c	S288c	Chr16	560005	17	yjm1078,yjm1129,yjm1242,yjm1332,yjm1336,yjm1341,yjm1415,yjm1417,yjm1477,yjm1526,yjm248,yjm453,yjm456,yjm972,yjm981,yjm990,yjm996,
LTR_TY3 not in S288c	S288c	Chr16	566764	1	yjm1418,
LTR_TY3 not in S288c	S288c	Chr16	571960	1	yjm1443,
LTR_TY3 not in S288c	S288c	Chr16	572164	1	yjm627,
LTR_TY3 not in S288c	S288c	Chr16	572251	1	yjm1443,
LTR_TY3 not in S288c	S288c	Chr16	578942	1	yjm1338,
LTR_TY3 not in S288c	S288c	Chr16	622643	6	yjm1248,yjm1273,yjm1434,yjm1439,yjm195,yjm627,
LTR_TY3 not in S288c	S288c	Chr16	689254	7	yjm1248,yjm1342,yjm1400,yjm1401,yjm1439,yjm1479,yjm195,
LTR_TY3 not in S288c	S288c	Chr16	689548	2	yjm320,yjm693,
LTR_TY3 not in S288c	S288c	Chr16	743974	5	yjm1248,yjm1439,yjm1447,yjm195,yjm627,
LTR_TY3 not in S288c	S288c	Chr16	775553	2	yjm1400,yjm1479,
LTR_TY3 not in S288c	S288c	Chr16	819217	3	yjm1304,yjm1401,yjm1443,
LTR_TY3 not in S288c	S288c	Chr16	844667	2	yjm1433,yjm453,
LTR_TY3 not in S288c	S288c	Chr16	850340	5	yjm270,yjm320,yjm326,yjm428,yjm693,
LTR_TY3 not in S288c	S288c	Chr16	850344	1	yjm1592,
LTR_TY3 not in S288c	S288c	Chr16	856886	4	yjm1388,yjm1389,yjm1447,yjm1592,
LTR_TY3 not in S288c	S288c	Chr16	860067	1	yjm1447,
LTR_TY3 not in S288c	S288c	Chr16	860362	1	yjm1549,
LTR_TY3 not in S288c	S288c	Chr16	887496	2	yjm1338,yjm1418,
	LTR_TY4 not in S288c	Chromosome	coordinates in S288c	1	Strains,
LTR_TY4 not in S288c	S288c	Chr01	4092	1	yjm1342,
LTR_TY4 not in S288c	S288c	Chr01	159874	1	yjm451,
LTR_TY4 not in S288c	S288c	Chr01	166165	1	yjm1418,
LTR_TY4 not in S288c	S288c	Chr01	180559	1	yjm1447,
LTR_TY4 not in S288c	S288c	Chr01	182960	1	yjm1460,
LTR_TY4 not in S288c	S288c	Chr02	8906	1	yjm1342,
LTR_TY4 not in S288c	S288c	Chr02	29346	2	yjm1342,yjm1447,
LTR_TY4 not in S288c	S288c	Chr02	196990	3	yjm1400,yjm1479,yjm326,
LTR_TY4 not in S288c	S288c	Chr02	220757	1	yjm1447,
LTR_TY4 not in S288c	S288c	Chr03	296975	1	yjm193,
LTR_TY4 not in S288c	S288c	Chr02	326746	2	yjm1342,yjm456,
LTR_TY4 not in S288c	S288c	Chr02	405363	1	yjm451,
LTR_TY4 not in S288c	S288c	Chr02	642883	1	yjm1385,
LTR_TY4 not in S288c	S288c	Chr02	762405	1	yjm1447,
LTR_TY4 not in S288c	S288c	Chr03	82328	2	yjm1418,yjm428,
LTR_TY4 not in S288c	S288c	Chr03	142669	1	yjm1527,
LTR_TY4 not in S288c	S288c	Chr03	151174	6	yjm1443,yjm1615,yjm451,yjm456,yjm554,yjm555,
LTR_TY4 not in S288c	S288c	Chr03	151234	1	yjm1388,
LTR_TY4 not in S288c	S288c	Chr03	227772	1	yjm1443,
LTR_TY4 not in S288c	S288c	Chr03	294768	2	yjm1273,yjm1434,
LTR_TY4 not in S288c	S288c	Chr03	294862	13	yjm1388,yjm1389,yjm1419,yjm1443,yjm1447,yjm1460,yjm1527,yjm1592,yjm320,yjm326,yjm456,yjm554,yjm693,
LTR_TY4 not in S288c	S288c	Chr03	295059	2	yjm1401,yjm1573,
LTR_TY4 not in S288c	S288c	Chr03	295356	1	yjm1549,
LTR_TY4 not in S288c	S288c	Chr04	436932	2	yjm1304,yjm1342,
LTR_TY4 not in S288c	S288c	Chr04	651652	2	yjm1199,yjm1202,
LTR_TY4 not in S288c	S288c	Chr04	803212	2	yjm470,yjm683,
LTR_TY4 not in S288c	S288c	Chr04	980858	1	yjm683,
LTR_TY4 not in S288c	S288c	Chr04	1075066	1	yjm1342,
LTR_TY4 not in S288c	S288c	Chr04	1101692	5	yjm1199,yjm1304,yjm320,yjm541,yjm554,
LTR_TY4 not in S288c	S288c	Chr04	1174883	1	yjm1385,
LTR_TY4 not in S288c	S288c	Chr04	1256859	1	yjm1447,
LTR_TY4 not in S288c	S288c	Chr04	1352330	7	yjm1208,yjm1433,yjm1549,yjm1615,yjm428,yjm450,yjm470,
LTR_TY4 not in S288c	S288c	Chr04	1352643	1	yjm1342,
LTR_TY4 not in S288c	S288c	Chr05	118407	1	yjm1447,
LTR_TY4 not in S288c	S288c	Chr05	136018	1	yjm1447,
LTR_TY4 not in S288c	S288c	Chr05	176440	1	yjm1447,
LTR_TY4 not in S288c	S288c	Chr05	176712	1	yjm1418,
LTR_TY4 not in S288c	S288c	Chr05	434430	5	yjm1342,yjm1444,yjm470,yjm682,yjm683,
LTR_TY4 not in S288c	S288c	Chr05	435654	2	yjm1342,yjm1447,
LTR_TY4 not in S288c	S288c	Chr05	438312	1	yjm1418,
LTR_TY4 not in S288c	S288c	Chr05	442519	1	yjm1447,
LTR_TY4 not in S288c	S288c	Chr05	443178	6	yjm1133,yjm1304,yjm326,yjm450,yjm682,yjm683,
LTR_TY4 not in S288c	S288c	Chr05	449416	1	yjm1418,
LTR_TY4 not in S288c	S288c	Chr05	469009	1	yjm1418,
LTR_TY4 not in S288c	S288c	Chr05	469010	2	yjm1342,yjm1447,
LTR_TY4 not in S288c	S288c	Chr05	487197	2	yjm1447,yjm248,
LTR_TY4 not in S288c	S288c	Chr05	498672	1	yjm1342,
LTR_TY4 not in S288c	S288c	Chr06	137561	1	yjm693,
LTR_TY4 not in S288c	S288c	Chr06	144503	1	yjm1342,
LTR_TY4 not in S288c	S288c	Chr06	157975	4	yjm1208,yjm1311,yjm1419,yjm1549,
LTR_TY4 not in S288c	S288c	Chr06	161575	1	yjm1447,
LTR_TY4 not in S288c	S288c	Chr06	161658	6	yjm1199,yjm1202,yjm1326,yjm1401,yjm1444,yjm456,
LTR_TY4 not in S288c	S288c	Chr06	181079	3	yjm1381,yjm1439,yjm195,
LTR_TY4 not in S288c	S288c	Chr06	181429	4	yjm1326,yjm1444,yjm450,yjm554,
LTR_TY4 not in S288c	S288c	Chr06	181702	1	yjm1447,
LTR_TY4 not in S288c	S288c	Chr06	191428	1	yjm1447,
LTR_TY4 not in S288c	S288c	Chr07	110555	9	yjm1133,yjm1307,yjm1311,yjm1386,yjm1400,yjm1460,yjm1479,yjm450,yjm555,
LTR_TY4 not in S288c	S288c	Chr07	110670	1	yjm1447,
LTR_TY4 not in S288c	S288c	Chr07	115100	1	yjm1418,
LTR_TY4 not in S288c	S288c	Chr07	204794	3	yjm1402,yjm1418,yjm1573,
LTR_TY4 not in S288c	S288c	Chr07	205442	1	yjm1447,
LTR_TY4 not in S288c	S288c	Chr07	286190	3	yjm1385,yjm1433,yjm450,
LTR_TY4 not in S288c	S288c	Chr07	287335	1	yjm1401,
LTR_TY4 not in S288c	S288c	Chr07	287554	3	yjm1389,yjm1460,yjm1592,
LTR_TY4 not in S288c	S288c	Chr07	319029	1	yjm1447,
LTR_TY4 not in S288c	S288c	Chr07	319755	2	yjm1342,yjm1418,
LTR_TY4 not in S288c	S288c	Chr07	327970	1	yjm1418,
LTR_TY4 not in S288c	S288c	Chr07	401885	1	yjm1418,
LTR_TY4 not in S288c	S288c	Chr07	422685	1	yjm1447,
LTR_TY4 not in S288c	S288c	Chr07	535026	1	yjm1383,
LTR_TY4 not in S288c	S288c	Chr07	535543	1	yjm1342,
LTR_TY4 not in S288c	S288c	Chr07	555023	2	yjm1389,yjm1592,
LTR_TY4 not in S288c	S288c	Chr07	700838	3	yjm1399,yjm1447,yjm627,
LTR_TY4 not in S288c	S288c	Chr07	701295	1	yjm1447,
LTR_TY4 not in S288c	S288c	Chr07	712434	1	yjm683,
LTR_TY4 not in S288c	S288c	Chr07	730701	2	yjm1400,yjm1479,
LTR_TY4 not in S288c	S288c	Chr07	738558	2	yjm1400,yjm1479,
LTR_TY4 not in S288c	S288c	Chr07	773710	1	yjm1447,
LTR_TY4 not in S288c	S288c	Chr07	811168	1	yjm1342,
LTR_TY4 not in S288c	S288c	Chr07	823309	1	yjm1342,
LTR_TY4 not in S288c	S288c	Chr07	878677	1	yjm1447,
LTR_TY4 not in S288c	S288c	Chr08	85909	1	yjm1447,
LTR_TY4 not in S288c	S288c	Chr08	116165	1	yjm1342,
LTR_TY4 not in S288c	S288c	Chr08	116404	1	yjm271,
LTR_TY4 not in S288c	S288c	Chr08	116418	2	yjm1527,yjm682,
LTR_TY4 not in S288c	S288c	Chr08	133119	1	yjm693,
LTR_TY4 not in S288c	S288c	Chr08	133180	1	yjm681,
LTR_TY4 not in S288c	S288c	Chr08	133862	1	yjm1342,
LTR_TY4 not in S288c	S288c	Chr08	133912	10	yjm1083,yjm1208,yjm1355,yjm1401,yjm1402,yjm1434,yjm1450,yjm1573,yjm1615,yjm470,
LTR_TY4 not in S288c	S288c	Chr08	146143	1	yjm555,
LTR_TY4 not in S288c	S288c	Chr16	146621	2	yjm1342,yjm1399,
LTR_TY4 not in S288c	S288c	Chr08	358381	3	yjm1199,yjm1444,yjm1447,
LTR_TY4 not in S288c	S288c	Chr08	359044	1	yjm1447,
LTR_TY4 not in S288c	S288c	Chr08	388801	1	yjm1419,
LTR_TY4 not in S288c	S288c	Chr08	388867	1	yjm1418,
LTR_TY4 not in S288c	S288c	Chr08	388962	1	yjm1401,
LTR_TY4 not in S288c	S288c	Chr08	389041	1	yjm271,
LTR_TY4 not in S288c	S288c	Chr08	466564	2	yjm1447,yjm1479,
LTR_TY4 not in S288c	S288c	Chr08	475649	6	yjm1202,yjm1388,yjm1389,yjm1447,yjm1460,yjm1592,
LTR_TY4 not in S288c	S288c	Chr09	197131	1	yjm456,
LTR_TY4 not in S288c	S288c	Chr09	197166	1	yjm1447,
LTR_TY4 not in S288c	S288c	Chr09	205216	3	yjm1400,yjm1479,yjm456,
LTR_TY4 not in S288c	S288c	Chr09	210548	1	yjm1433,
LTR_TY4 not in S288c	S288c	Chr09	246307	1	yjm1460,
LTR_TY4 not in S288c	S288c	Chr09	324195	2	yjm1418,yjm1447,
LTR_TY4 not in S288c	S288c	Chr09	324462	1	yjm1444,
[truncated: 205 more rows]

## Sheet: (C) Total Nos.
	Present in S288c		Not present in S288c
LTRs	present in 1 or more of the 93 strains (no. of positions)	private to S288c (no. of positions)	present in 1 or more of the 93 strains (no. of positions)	private to 1 of the 93 strains (no. of positions)
Delta	100	62	1628	795
Sigma	25	2	263	129
Tau	14	4	248	160
Omega	6	0	62	35
