# Supplementary material for: The 100-genomes strains, an S. cerevisiae resource that illuminates its natural phenotypic and genotypic variation and emergence as an opportunistic pathogen
Source: HighWire-hosted journal article supplement (doi:10.1101/gr.185538.114), 2015-04-03
Supplement: Table_S11.docx [file Table_S11.docx]

**Table S11**. List of genes with LTR insertions, the strain names in which they appear, and the location of insertion.

| **LTR type** | **Gene name** | **ORF length (# of amino acids)** | **Strain** | **LTR insertion after amino acid #** |
| --- | --- | --- | --- | --- |
| Delta | FRE1 | 686 | YJM270 | 423 |
| " | FEN2 | 512 | YJM270 | 468 |
| " | YPS6 | 537 | YJM1273 | 439 |
| " | " | " | YJM1434 | " |
| " | AVT7 | 490 | YJM1478 | 401 |
| " | DUR3 | 735 | YJM1444 | 725 |
| " | YLR118C | 227 | YJM1341 | 220 |
| " | GEX1 | 615 | YJM693 | 204 |
| " | " | " | YJM969 | " |
| " | " | " | YJM975 | " |
| " | " | " | YJM987 | " |
| " | " | " | YJM993 | " |
| " | " | " | YJM1332 | " |
| " | " | " | YJM1478 | " |
| " | HAP1 | 1483 | S288C | 1470 |
| " | YDL109C | 647 | YJM1381 | 10 |
| " | GRX3 | 285 | YJM470 | 40 |
| " | ECM11 | 302 | YJM681 | 61 |
| " | DCV1 | 202 | YJM1083 | 13 |
| " | " | " | YJM1129 | " |
| " | " | " | YJM1356 | " |
| " | " | " | YJM1526 | " |
| " | " | " | YJM189 | " |
| " | YGL117W | 265 | YJM1199 | 187 |
| " | " | " | YJM1202 | " |
| " | TPO2 | 614 | YJM1574 | 84 |
| " | ARN2 | 620 | YJM1400 | 344 |
| " | " | " | YJM1479 | " |
| " | ECM12 | 151 | YJM1419 | 143 |
| " | " | " | YJM456 | " |
| " | YHR022C | 256 | YJM1419 | 232 |
| " | " | " | YJM456 | " |
| " | YIL014C-A | 104 | YJM1447 | 61 |
| " | " | " | YJM1460 | 47 |
| " | YIL089W | 205 | YJM1381 | 43 |
| " | ICS3 | 131 | YJM1401 | 114 |
| " | SPG4 | 115 | YJM450 | 25 |
| " | DOM34 | 386 | YJM470 | 33 |
| " | YOL107W | 342 | YJM1450 | 300 |
| Sigma | YPR071W | 211 | YJM195 | 87 |
| Tau | GIT1 | 518 | YJM193 | 443 |
