# Supplementary material for: The 100-genomes strains, an S. cerevisiae resource that illuminates its natural phenotypic and genotypic variation and emergence as an opportunistic pathogen
Source: HighWire-hosted journal article supplement (doi:10.1101/gr.185538.114), 2015-04-03
Supplement: Table_S12.xlsx [file Table_S12.xlsx]

## Sheet: FS_Stop genes
Genes with ORF length polymorphisms, relative to the canonical S288c. Genes (excluding sub-telomeric, duplicated, and intron-containing genes) with ORF length polymorphisms, relative to the canonical S288c, due to frameshift indels (FS) and premature stop codons (Stop); (0) denotes those genes with no FS or premature stop.
systematic name	standard name	experiment type	Null	in strain	phenotype	YJM1078	YJM1083	YJM1129	YJM1133	YJM1190	YJM1199	YJM1202	YJM1208	YJM1242	YJM1244	YJM1248	YJM1250	YJM1252	YJM1273	YJM1304	YJM1307	YJM1311	YJM1326	YJM1332	YJM1336	YJM1338	YJM1341	YJM1342	YJM1355	YJM1356	YJM1381	YJM1383	YJM1385	YJM1386	YJM1387	YJM1388	YJM1389	YJM1399	YJM1400	YJM1401	YJM1402	YJM1415	YJM1417	YJM1418	YJM1419	YJM1433	YJM1434	YJM1439	YJM1443
YAL002W	VPS8					0	0	0	0	0	0	0	0	0	0	0	0	0	0	0	0	0	0	0	0	0	0	0	0	0	0	0	0	0	0	0	0	0	0	0	0	0	0	0	0	0	0	0	0
YAL037W	YAL037W					FS	0	0	0	0	0	0	0	0	0	0	0	FS	0	0	0	0	0	0	0	0	0	0	0	0	0	0	0	0	0	0	0	0	0	0	0	0	0	0	0	0	0	0	0
YAL039C	CYC3					0	0	0	0	0	0	0	0	0	0	0	0	0	0	0	0	0	0	0	0	0	0	0	0	0	0	0	0	0	0	0	0	0	0	FS	0	0	0	0	0	0	0	0	0
YAL059W	ECM1					Stop	Stop	Stop	Stop	Stop	Stop	Stop	Stop	Stop	Stop	Stop	Stop	Stop	Stop	Stop	Stop	Stop	Stop	Stop	Stop	Stop	Stop	Stop	Stop	Stop	Stop	Stop	Stop	Stop	Stop	Stop	Stop	Stop	Stop	Stop	Stop	Stop	Stop	Stop	Stop	Stop	Stop	Stop	Stop
YAR023C	YAR023C					0	0	0	FS	0	FS	FS	0	0	0	0	0	0	0	0	0	FS	FS	0	0	0	0	0	0	FS	0	FS	0	FS	0	0	0	FS	0	0	0	0	FS	0	0	0	0	0	0
YBL005W	PDR3					0	0	0	0	0	0	0	0	0	FS	0	0	0	0	0	0	0	0	0	0	0	0	0	0	0	0	0	0	0	0	0	0	0	0	0	0	0	0	0	0	0	0	0	0
YBL008W-A	YBL008W-A					0	0	0	0	0	0	0	0	0	0	Stop	0	0	0	0	0	0	0	0	0	0	0	0	0	0	0	0	0	0	0	0	0	0	0	0	0	0	0	0	0	0	0	Stop	0
YBL033C	RIB1					0	0	0	0	0	0	0	0	0	0	0	0	0	0	0	0	0	0	0	0	0	0	0	0	0	0	0	0	0	0	0	0	0	0	0	0	0	0	0	0	0	0	0	0
YBL039W-B	YBL039W-B					0	0	0	0	0	0	0	0	0	0	0	0	0	0	0	0	FS	0	0	0	0	0	0	0	0	0	0	0	0	0	0	0	0	0	0	0	0	0	0	0	0	0	0	0
YBL044W	YBL044W					FS	FS	FS	FS	FS	FS	FS	FS	FS	FS	FS	FS	FS	FS	FS	FS	FS	FS	FS	FS	FS	FS	FS	FS	FS	FS	FS	FS	FS	FS	FS	FS	FS	FS	FS	FS	FS	FS	Stop	FS	FS	FS	FS	FS
YBL086C	YBL086C					0	0	0	0	0	0	0	0	0	0	0	0	0	0	0	0	0	0	0	0	0	0	0	FS	0	0	0	0	0	0	0	0	0	0	0	0	0	0	0	0	0	0	0	0
YBL106C	SRO77					0	0	Stop	0	0	0	0	0	0	0	0	0	0	0	0	FS	0	0	0	0	0	0	0	0	0	0	0	0	0	0	0	0	0	0	0	0	0	0	0	0	0	0	0	0
YBR029C	CDS1	systematic mutation set	null	S288C	inviable	0	0	0	0	0	0	0	0	0	0	0	0	0	0	0	0	0	0	0	0	0	0	FS	0	0	0	0	0	0	0	0	0	0	0	0	0	0	0	0	0	0	0	0	0
YBR063C	YBR063C					0	0	0	0	0	0	0	0	0	0	0	0	0	0	0	0	0	FS	0	0	0	0	0	0	0	0	0	0	0	0	0	0	0	0	0	0	0	0	0	0	0	0	0	0
YBR069C	TAT1					0	0	0	0	0	0	0	0	0	0	0	0	0	0	0	0	0	0	0	0	0	0	0	0	0	0	0	0	0	0	0	0	0	0	0	0	0	0	0	0	0	0	0	0
YBR073W	RDH54					Stop	FS	FS	FS	FS	FS	FS	FS	FS	FS	FS	FS	FS	FS	FS	FS	FS	FS	FS	FS	FS	FS	FS	FS	FS	FS	FS	FS	FS	FS	FS	FS	FS	FS	FS	FS	FS	FS	FS	FS	FS	FS	FS	FS
YBR081C	SPT7					FS	0	0	0	0	0	0	0	0	0	0	0	0	0	0	0	0	0	0	0	0	0	0	0	0	0	0	0	0	0	0	0	0	0	0	0	0	0	0	0	0	0	0	0
YBR083W	TEC1					0	0	0	0	0	0	0	0	0	0	0	0	0	0	0	0	0	0	0	0	0	0	0	0	0	0	0	0	0	0	0	0	0	0	0	0	0	0	0	0	0	0	0	0
YBR096W	YBR096W					0	0	0	0	0	0	0	0	0	0	0	0	0	0	0	0	0	0	0	0	0	0	0	0	0	0	0	0	0	0	0	0	0	0	0	0	0	0	0	0	0	0	0	0
YBR103W	SIF2					0	0	0	0	0	0	0	0	0	0	0	0	0	0	0	0	0	0	0	0	0	0	0	0	0	0	0	0	0	0	0	0	0	0	0	0	0	0	0	0	0	0	0	0
YBR117C	TKL2					0	0	0	0	0	0	0	0	0	0	0	0	0	0	0	0	0	0	0	0	0	0	0	0	0	0	0	0	0	0	0	0	0	0	0	0	0	0	0	0	0	0	0	0
YBR123C	TFC1	classical genetics	null	Other	inviable	0	0	0	0	0	0	0	0	0	0	0	0	0	0	0	0	0	0	0	0	0	0	0	0	0	0	0	0	0	0	0	0	0	0	0	0	0	0	0	0	0	0	0	0
YBR138C	YBR138C					0	0	0	0	0	0	0	0	0	0	0	0	0	0	0	0	0	0	0	0	0	0	0	0	0	0	0	0	0	0	0	0	0	0	0	0	0	0	0	0	0	0	0	0
YBR152W	SPP381	systematic mutation set	null	S288C	inviable	0	0	0	0	Stop	0	Stop	0	0	0	0	0	0	0	0	0	0	0	0	0	0	0	0	0	0	0	0	0	0	0	0	0	0	0	0	0	0	0	0	0	0	0	0	0
YBR161W	CSH1					0	0	0	0	0	0	0	0	0	0	0	0	0	0	0	0	0	0	FS	0	0	0	0	0	0	0	0	0	0	0	0	0	0	0	0	0	0	0	0	0	0	0	0	0
YBR182C-A	YBR182C-A					FS	0	FS	FS	FS	FS	FS	0	FS	FS	FS	FS	FS	FS	FS	FS	FS	FS	FS	FS	FS	FS	Stop	FS	FS	FS	FS	FS	FS	FS	FS	FS	FS	FS	FS	FS	FS	FS	FS	FS	0	FS	FS	FS
YBR184W	YBR184W					0	0	0	0	0	0	0	0	0	0	FS	0	0	0	0	0	0	0	0	0	0	0	0	0	0	0	0	0	0	0	0	0	0	FS	0	0	0	0	0	0	0	0	FS	0
YBR196C-A	YBR196C-A					0	0	0	0	0	0	0	0	0	0	0	0	0	0	0	0	0	0	0	0	0	0	0	0	0	0	0	0	0	0	0	0	0	0	0	0	0	0	0	0	0	0	0	0
YBR196C-B	YBR196C-B					0	0	0	FS	FS	0	0	0	0	0	FS	FS	0	0	0	0	0	0	0	0	0	0	FS	0	0	0	0	0	0	0	0	0	0	FS	0	0	0	0	0	0	0	0	FS	FS
YBR200W-A	YBR200W-A					0	0	0	FS	FS	0	0	0	0	0	0	0	0	0	0	0	0	0	0	0	Stop	0	0	0	0	0	0	0	0	0	0	0	0	0	0	Stop	0	0	0	0	0	0	0	FS
YBR278W	DPB3					0	0	0	0	0	0	0	0	0	0	0	0	0	0	0	0	0	0	0	0	0	0	0	0	0	0	0	0	0	0	0	0	0	0	0	0	0	0	0	0	0	0	0	0
YBR284W	YBR284W					0	0	0	0	Stop	0	0	0	0	0	0	0	0	0	0	0	0	Stop	0	0	0	0	0	0	0	0	0	0	0	0	0	Stop	0	0	0	0	0	0	0	0	0	0	0	0
YBR293W	VBA2					0	0	0	0	0	0	0	0	0	0	0	0	0	0	0	0	0	0	0	0	0	0	0	0	0	0	0	0	0	0	0	0	0	0	0	0	0	0	0	0	Stop	0	0	0
YBR294W	SUL1					0	0	0	0	0	0	0	0	0	0	0	0	0	0	0	0	0	0	0	0	0	0	0	0	0	0	0	0	0	Stop	0	0	0	Stop	0	0	0	0	0	0	0	0	0	0
YBR296C	PHO89					0	0	0	0	0	0	0	0	0	0	0	0	0	0	0	0	0	0	0	0	0	0	0	0	0	0	0	0	0	0	0	0	0	0	0	0	0	0	0	0	0	0	0	0
YCL001W-B	YCL001W-B					0	FS	0	0	0	0	0	0	0	0	0	0	0	0	FS	0	0	0	0	0	0	0	0	0	0	0	0	0	0	0	0	0	0	0	0	0	0	0	0	0	0	0	0	0
YCL033C	MXR2					0	0	0	0	0	0	0	0	0	0	Stop	0	0	0	0	0	0	0	0	0	0	0	0	0	0	0	0	0	0	0	0	0	0	0	0	0	0	0	0	0	0	0	Stop	0
YCL042W	YCL042W					FS	Stop	FS	FS	FS	FS	FS	FS	FS	FS	FS	FS	FS	FS	FS	0	FS	FS	FS	FS	FS	FS	FS	FS	FS	FS	FS	FS	FS	FS	0	0	FS	FS	FS	FS	FS	FS	FS	FS	FS	FS	FS	FS
YCL049C	YCL049C					0	0	Stop	0	Stop	0	0	0	Stop	FS	0	0	0	0	0	0	Stop	Stop	0	Stop	0	Stop	0	0	Stop	0	Stop	0	0	Stop	0	0	0	0	0	0	0	0	0	0	0	0	0	0
YCR018C	SRD1					0	0	0	0	0	0	0	0	0	0	0	0	0	0	0	0	0	0	0	0	0	0	0	0	0	0	0	0	0	0	0	FS	FS	0	0	0	0	0	0	0	0	0	0	0
YCR020C	PET18					0	0	0	0	0	0	0	0	0	0	0	0	0	0	0	0	0	0	0	0	0	0	0	0	0	0	0	0	0	0	0	0	0	0	0	0	0	0	0	0	0	0	0	0
YCR024C-B	YCR024C-B					FS	FS	FS	FS	FS	FS	FS	FS	FS	FS	FS	FS	FS	FS	FS	FS	FS	FS	FS	FS	FS	FS	FS	FS	FS	FS	FS	FS	FS	FS	FS	FS	FS	FS	FS	FS	FS	FS	FS	FS	FS	FS	FS	FS
YCR050C	YCR050C					Stop	0	0	0	0	0	0	0	0	0	0	0	0	0	0	0	0	0	0	0	0	0	0	0	0	0	0	0	0	0	0	0	0	0	0	0	0	0	0	0	0	0	0	0
YCR059C	YIH1					0	0	0	0	0	0	0	0	0	0	0	0	0	0	0	0	0	0	0	0	0	0	0	0	0	0	0	0	0	0	0	0	0	0	0	0	0	0	0	0	0	0	0	0
YCR073C	SSK22					0	0	0	0	FS	0	0	0	0	0	0	0	0	0	0	0	0	0	0	0	0	0	0	0	0	FS	0	0	0	0	0	0	0	0	0	0	0	0	0	0	0	0	0	0
YCR075C	ERS1					0	0	0	0	0	0	0	0	0	0	0	0	0	0	0	0	0	0	0	0	0	0	0	0	0	0	0	0	0	0	0	0	0	0	Stop	0	0	0	0	0	0	0	0	0
YCR092C	MSH3					0	0	0	0	0	0	0	0	0	0	0	FS	0	0	0	0	0	0	0	0	0	0	0	0	0	0	0	0	FS	0	0	0	FS	0	0	0	0	0	0	0	0	0	0	0
YCR093W	CDC39	systematic mutation set	null	S288C	inviable	0	0	0	0	0	0	0	0	0	0	0	0	0	0	0	0	0	0	0	0	0	0	0	0	0	0	0	0	0	0	0	0	0	0	0	0	0	0	0	0	0	0	0	0
YCR095W-A	YCR095W-A					0	0	0	0	FS	0	0	0	0	0	0	0	0	0	FS	0	0	FS	0	0	0	0	FS	0	0	0	0	0	0	0	0	0	FS	FS	0	0	0	0	0	0	0	0	0	0
YDL059C	RAD59					0	0	0	0	0	0	0	0	FS	FS	0	0	0	0	0	0	0	0	0	0	0	0	0	FS	0	0	FS	0	0	FS	0	0	0	0	0	0	FS	0	0	0	0	0	0	0
YDL080C	THI3					FS	FS	FS	FS	FS	FS	0	FS	FS	FS	FS	FS	FS	FS	FS	FS	FS	FS	FS	FS	FS	FS	FS	FS	FS	FS	FS	FS	FS	FS	FS	FS	FS	FS	FS	FS	FS	FS	FS	FS	0	FS	FS	FS
YDL112W	TRM3					0	0	0	0	0	0	0	0	0	0	0	0	0	0	0	FS	0	0	0	0	0	0	0	0	0	0	0	0	0	0	0	0	0	0	0	0	0	0	0	0	0	0	0	0
YDL118W	YDL118W					0	0	0	FS	0	0	0	FS	0	0	FS	0	0	0	FS	FS	FS	0	0	0	0	0	FS	0	0	0	0	0	FS	0	0	0	0	0	0	0	0	0	0	0	FS	0	FS	0
YDL121C	YDL121C					0	0	0	0	0	0	0	0	0	0	0	0	0	0	0	0	0	0	0	0	0	0	0	0	0	0	0	0	0	0	0	0	0	0	0	0	0	0	0	0	0	0	0	0
YDL122W	UBP1					0	0	0	0	0	0	0	0	0	0	0	0	0	0	0	0	0	0	0	0	0	0	0	0	0	0	0	0	0	0	0	0	0	0	0	0	0	0	0	0	0	0	0	0
YDL124W	YDL124W					0	0	0	0	0	0	0	0	0	0	0	0	0	0	0	0	0	0	0	0	0	0	0	0	0	0	0	0	0	0	0	0	0	0	0	0	0	0	0	FS	0	0	0	0
YDL138W	RGT2					0	0	0	0	0	0	0	0	0	0	0	0	0	0	0	0	0	0	0	0	0	0	0	0	0	0	0	0	0	0	0	0	Stop	0	0	0	0	0	0	0	0	0	0	0
YDL170W	UGA3					0	0	0	0	0	0	0	0	0	0	0	0	0	0	0	0	0	0	0	0	0	0	0	0	0	0	0	0	0	0	0	0	0	0	0	0	0	0	0	0	0	0	0	0
YDL197C	ASF2					0	Stop	0	0	0	0	0	0	0	0	0	0	0	0	0	0	0	0	0	0	0	0	0	0	0	0	0	0	0	0	0	0	0	0	0	0	0	0	0	0	0	0	0	0
YDL199C	YDL199C					0	0	0	0	0	0	0	Stop	0	0	0	0	0	0	0	0	0	0	0	0	0	0	0	0	0	0	0	0	0	0	0	0	0	0	0	0	0	0	0	Stop	0	0	0	0
YDR003W-A	YDR003W-A					0	0	0	0	0	0	0	0	0	0	0	0	0	0	0	0	0	0	0	0	0	FS	0	0	0	0	0	0	0	0	0	0	0	FS	FS	0	0	0	0	0	0	0	0	0
YDR009W	GAL3					0	0	0	0	0	0	0	0	0	0	Stop	0	0	0	0	0	0	0	0	0	0	0	0	0	0	0	0	0	0	0	0	0	0	0	0	0	0	0	0	0	0	0	Stop	0
YDR018C	YDR018C					FS	FS	FS	FS	FS	FS	FS	FS	FS	FS	FS	FS	FS	FS	FS	FS	FS	FS	FS	FS	FS	FS	FS	FS	FS	FS	FS	FS	FS	FS	FS	FS	FS	FS	FS	FS	FS	FS	FS	FS	FS	FS	FS	FS
YDR030C	RAD28					0	0	0	0	0	0	0	0	0	0	0	0	0	0	0	0	0	0	0	0	0	0	0	0	0	0	0	0	0	0	0	0	0	0	0	0	0	0	0	0	0	0	0	0
YDR055W	PST1					FS	0	0	0	0	0	0	0	0	0	0	0	FS	0	0	0	0	0	0	0	0	0	FS	0	0	0	0	0	0	0	0	0	0	0	0	0	0	0	0	0	0	0	0	0
YDR066C	RTR2					0	0	0	0	0	0	0	0	0	0	0	0	0	0	0	0	0	0	0	0	0	0	0	0	0	0	0	0	0	0	0	0	0	0	0	0	0	0	0	0	0	0	0	0
YDR072C	IPT1					0	0	0	0	0	0	0	0	0	0	0	0	0	0	0	0	0	0	0	0	0	0	0	0	0	0	0	0	0	0	0	0	0	0	0	0	0	0	0	0	0	0	0	0
YDR093W	DNF2					0	0	0	0	0	0	0	0	0	0	0	0	0	0	0	0	0	0	0	0	0	0	0	0	0	0	0	0	0	0	0	0	0	0	0	0	0	0	0	0	0	0	0	0
YDR107C	TMN2					0	0	0	0	0	0	0	0	0	0	0	0	0	0	0	0	0	0	0	0	0	0	0	0	0	0	0	0	0	0	0	0	0	0	0	0	Stop	0	0	0	0	0	0	0
YDR109C	YDR109C					0	0	0	0	0	0	0	0	0	0	0	0	FS	0	0	0	0	0	0	0	0	0	0	0	0	0	0	0	0	0	0	0	0	0	0	0	0	0	0	0	0	0	0	0
YDR111C	ALT2					0	0	0	0	0	0	0	0	0	0	0	0	0	0	0	0	0	0	0	0	0	0	0	0	0	0	0	0	0	0	0	0	0	0	0	0	0	0	0	0	0	0	0	0
YDR114C	YDR114C					FS	Stop	0	0	Stop	0	0	0	0	FS	Stop	0	FS	0	0	0	FS	FS	FS	FS	0	0	0	FS	FS	FS	0	FS	0	0	Stop	Stop	0	0	FS	0	FS	FS	FS	0	FS	0	Stop	0
YDR119W	VBA4					0	Stop	0	0	Stop	Stop	Stop	0	0	0	Stop	0	0	Stop	0	0	0	Stop	0	0	Stop	0	Stop	Stop	0	0	0	0	0	0	Stop	Stop	Stop	Stop	Stop	Stop	0	0	Stop	Stop	0	Stop	Stop	Stop
YDR121W	DPB4					0	0	0	0	0	0	0	0	0	0	0	0	0	0	0	0	0	0	0	0	0	0	0	0	0	0	0	0	0	0	0	0	0	0	0	0	0	0	0	0	0	0	0	0
YDR125C	ECM18					0	0	0	0	0	0	0	0	0	0	0	0	0	0	0	0	0	0	0	0	0	0	FS	0	0	0	0	0	0	0	0	0	0	FS	0	0	0	0	0	0	0	0	0	0
YDR144C	MKC7					Stop	0	0	0	0	0	0	Stop	0	0	0	0	Stop	0	0	0	0	0	0	0	0	0	0	0	0	0	0	0	0	0	0	0	0	0	0	0	0	0	0	0	0	0	0	0
YDR152W	GIR2					0	0	0	0	0	0	0	0	0	0	0	0	0	0	0	0	0	0	0	0	0	0	0	0	0	0	0	0	0	0	0	0	Stop	0	0	0	0	0	0	Stop	0	0	0	0
YDR168W	CDC37	systematic mutation set	null	S288C	inviable	0	0	0	0	0	0	0	0	0	FS	0	0	0	0	0	0	0	0	0	0	0	0	0	0	0	0	0	0	0	0	0	0	0	0	0	0	0	0	0	0	0	0	0	0
YDR169C-A	YDR169C-A					FS	FS	FS	FS	FS	FS	FS	FS	FS	FS	FS	FS	FS	FS	FS	FS	0	FS	FS	FS	FS	FS	FS	FS	FS	FS	FS	FS	FS	FS	FS	FS	FS	FS	FS	FS	FS	FS	FS	FS	FS	FS	FS	FS
YDR181C	SAS4					0	0	0	0	0	0	0	Stop	0	0	0	FS	0	0	0	0	0	0	0	0	0	0	0	0	0	0	0	0	0	0	0	0	0	0	0	0	0	0	0	0	0	0	0	0
YDR182W-A	YDR182W-A					0	0	0	0	0	0	0	0	0	0	0	0	0	0	0	0	0	0	0	0	0	0	0	0	0	0	Stop	0	0	0	0	0	0	0	0	0	0	0	0	FS	0	0	0	0
YDR194W-A	YDR194W-A					0	0	0	0	Stop	Stop	Stop	Stop	0	0	0	0	0	0	0	0	0	0	0	0	0	0	Stop	0	0	0	0	0	0	0	0	0	Stop	0	0	0	0	0	0	0	0	0	0	Stop
YDR198C	RKM2					0	0	0	0	0	Stop	Stop	0	0	0	0	0	0	0	0	Stop	0	0	0	0	0	0	0	0	0	Stop	0	0	0	0	0	0	0	0	0	0	0	0	0	0	0	0	0	0
YDR204W	COQ4					0	0	0	0	0	0	0	0	0	0	0	0	0	0	0	0	0	0	0	0	0	0	0	0	0	0	0	0	0	0	0	0	0	Stop	0	0	0	0	0	0	0	0	0	0
YDR218C	SPR28					0	0	0	0	0	0	0	0	0	0	0	0	0	0	0	FS	0	0	0	0	0	0	0	0	0	0	FS	0	0	0	0	0	0	0	0	0	0	0	0	0	0	0	0	0
YDR223W	CRF1					0	0	0	0	Stop	0	0	0	0	0	0	Stop	FS	0	FS	0	0	0	0	0	0	0	0	Stop	Stop	Stop	0	0	0	0	0	0	0	0	Stop	0	0	0	0	0	0	0	0	0
YDR229W	IVY1					0	0	0	0	0	0	0	0	0	0	0	0	0	0	0	0	0	0	0	0	0	0	0	0	0	0	0	0	0	0	0	0	0	0	0	0	0	0	0	0	0	0	0	0
YDR246W-A	YDR246W-A					0	0	0	0	0	0	0	0	0	0	FS	0	0	0	0	0	0	0	0	0	0	0	0	0	0	0	0	0	0	0	0	0	0	0	0	0	0	0	0	0	0	0	FS	0
YDR246W	TRS23	systematic mutation set	null	S288C	inviable	0	0	0	0	0	0	0	0	0	0	0	0	0	0	0	0	0	0	0	0	0	0	0	0	0	0	0	0	0	0	0	0	0	0	0	0	0	0	0	0	0	0	0	0
YDR247W	VHS1					0	0	0	0	0	0	0	0	0	0	0	0	0	0	0	0	0	0	0	0	0	0	0	0	0	0	0	0	0	0	0	0	0	0	0	0	0	0	0	0	0	0	0	0
YDR248C	YDR248C					0	0	0	0	0	0	0	0	0	0	0	0	0	0	0	0	0	0	0	0	0	0	0	0	0	0	0	0	0	0	0	0	0	0	0	0	0	0	0	0	0	0	0	0
YDR258C	HSP78					0	0	0	0	0	0	0	0	0	0	0	0	0	0	0	0	0	0	0	0	0	0	0	0	0	0	Stop	0	0	0	0	0	0	0	0	0	0	0	0	0	0	0	0	0
YDR261C	EXG2					FS	0	0	0	0	0	0	0	0	0	0	0	FS	0	0	0	0	0	0	0	0	0	0	0	0	0	0	0	0	0	0	0	0	0	0	0	0	0	0	0	0	0	0	0
YDR270W	CCC2					0	0	0	0	0	0	0	0	0	0	Stop	0	0	0	0	0	0	0	0	0	0	0	0	0	0	0	0	0	0	0	0	0	0	0	0	0	0	0	0	0	0	0	Stop	0
YDR279W	RNH202					0	0	0	0	0	0	0	0	0	0	0	0	0	0	FS	0	0	0	0	0	0	0	0	0	0	0	0	0	0	0	0	0	0	0	0	0	0	0	0	0	0	0	0	0
YDR325W	YCG1	classical genetics	null	Other	inviable	0	0	0	0	0	0	0	0	0	0	0	0	0	0	0	0	0	0	0	0	0	0	0	0	0	0	0	0	0	0	0	0	0	0	0	0	0	0	0	0	0	0	0	0
YDR330W	UBX5					0	0	0	0	0	0	0	0	0	0	0	0	0	0	0	0	0	0	0	0	0	0	0	0	0	0	0	0	0	0	0	0	0	0	0	0	0	0	0	0	0	0	0	0
YDR336W	YDR336W					FS	0	0	0	0	0	0	0	0	0	0	0	0	0	0	0	0	0	0	0	0	0	0	0	0	0	0	0	0	0	0	0	0	0	0	0	0	0	0	0	0	0	0	0
YDR338C	YDR338C					0	0	0	FS	0	0	0	0	0	0	0	0	0	0	0	0	0	0	0	0	0	0	0	0	0	0	0	0	0	0	0	0	0	0	0	0	0	0	0	0	0	0	0	0
YDR348C	YDR348C					Stop	0	0	0	0	0	0	0	0	0	0	0	Stop	0	0	0	0	0	0	0	0	0	0	0	0	0	0	0	0	0	0	0	0	0	0	0	0	0	0	0	0	0	0	0
YDR374C	YDR374C					0	0	0	0	0	0	0	0	0	0	0	0	0	0	0	0	0	0	0	0	0	0	0	0	0	0	0	0	0	0	0	0	0	0	0	0	0	0	0	0	0	0	0	0
YDR379W	RGA2					0	0	0	0	0	0	0	0	0	0	FS	0	0	0	0	0	0	0	0	0	0	0	0	0	0	0	0	0	0	0	0	0	0	0	0	0	0	0	0	0	0	0	FS	0
YDR387C	YDR387C					0	0	0	0	0	0	0	0	0	0	0	0	0	0	0	0	0	0	0	0	0	0	0	0	0	0	0	0	0	0	FS	0	0	0	0	0	0	0	0	0	0	0	0	0
YDR423C	CAD1					0	0	0	0	0	0	0	0	0	0	0	0	0	0	0	0	0	0	0	0	0	0	0	0	0	0	0	0	0	0	0	0	0	0	0	0	0	0	0	0	0	0	0	0
YDR441C	APT2					0	0	0	0	FS	0	0	0	0	0	0	0	0	0	0	0	0	0	0	0	0	0	0	0	0	0	0	0	0	0	0	0	0	0	0	0	0	0	0	0	0	0	0	0
YDR453C	TSA2					0	0	0	0	0	0	0	0	0	0	0	0	0	0	0	0	0	0	0	0	0	0	0	0	0	Stop	0	0	0	0	0	0	0	0	0	0	0	0	0	0	0	0	0	0
YDR456W	NHX1					0	0	0	0	0	0	0	0	0	0	0	0	0	0	0	0	0	0	0	0	0	0	0	0	0	0	0	0	0	0	0	0	0	0	0	0	0	0	0	0	0	0	0	0
YDR490C	PKH1					0	FS	0	0	0	0	0	0	0	0	0	0	0	0	0	0	0	0	0	0	0	0	0	0	0	0	0	0	0	0	0	0	0	0	0	0	0	0	0	0	0	0	0	0
YDR501W	PLM2					0	0	0	0	0	0	0	0	0	0	0	0	0	0	0	0	0	0	0	0	0	0	0	0	0	0	0	0	0	0	0	0	0	0	0	0	0	0	0	0	0	0	0	0
YDR504C	SPG3					0	0	0	0	0	0	0	FS	0	0	FS	FS	FS	0	0	0	0	0	0	0	0	0	FS	0	0	0	0	0	FS	0	0	0	FS	0	0	0	0	0	Stop	0	0	0	FS	0
YDR512C	EMI1					Stop	Stop	Stop	Stop	Stop	Stop	Stop	0	Stop	Stop	Stop	Stop	Stop	Stop	Stop	Stop	0	Stop	Stop	Stop	Stop	Stop	Stop	Stop	Stop	0	Stop	Stop	0	Stop	0	0	Stop	Stop	Stop	Stop	Stop	Stop	Stop	0	0	Stop	Stop	Stop
YDR520C	URC2					0	0	0	0	0	0	0	0	0	0	0	0	0	0	0	0	0	0	0	0	0	0	0	0	0	Stop	0	0	0	0	0	0	0	0	0	0	0	0	0	0	0	0	0	0
YDR522C	SPS2					Stop	0	0	FS	0	0	0	0	0	0	0	0	Stop	0	0	FS	0	0	0	0	FS	0	0	0	0	0	0	0	0	0	0	0	0	0	0	0	0	0	0	0	0	0	0	FS
YDR538W	PAD1					0	0	0	0	0	0	0	0	0	0	Stop	0	0	0	0	0	0	0	0	0	0	0	0	0	0	0	0	0	0	0	0	0	0	0	0	0	0	0	0	0	0	0	Stop	0
YDR539W	FDC1					0	0	0	0	0	0	0	0	0	0	FS	0	0	0	0	0	0	0	0	0	0	0	0	0	0	FS	0	0	0	0	0	0	0	0	0	0	0	0	0	0	0	0	FS	0
YDR541C	YDR541C					FS	0	0	0	0	0	0	0	0	0	0	0	FS	0	0	0	0	0	0	0	0	0	0	0	0	0	0	0	0	0	0	0	0	0	0	0	0	0	0	0	0	0	0	0
YEL020W-A	TIM9	classical genetics	null	Other	inviable	0	0	0	0	0	0	0	0	0	0	0	0	Stop	0	0	0	0	0	0	0	0	0	0	0	0	0	0	0	0	0	0	0	0	0	0	0	0	0	0	0	0	0	0	0
YEL023C	YEL023C					0	0	0	0	0	0	0	0	0	0	0	0	0	0	0	0	FS	0	0	0	0	0	0	0	0	0	0	0	0	0	0	0	0	0	0	0	0	0	0	0	0	0	0	0
YEL025C	YEL025C					0	0	0	0	0	0	0	0	0	0	0	0	0	0	0	0	0	0	0	0	0	0	0	0	0	0	0	Stop	0	0	0	0	0	0	0	0	0	0	0	0	0	0	0	0
YEL030W	ECM10					0	0	0	0	0	0	0	0	0	0	0	0	0	0	0	0	0	0	0	0	0	0	0	0	0	0	0	0	0	0	0	0	Stop	0	0	0	0	0	0	0	0	0	0	0
YEL040W	UTR2					0	0	0	0	0	0	0	0	0	0	0	0	0	0	0	0	0	0	0	0	0	0	0	0	0	0	0	0	0	0	0	0	0	0	0	0	0	0	0	0	0	0	0	0
YEL055C	POL5	classical genetics	null	W303	inviable	0	0	0	0	0	0	0	0	0	0	0	0	0	0	0	0	0	0	0	0	0	0	0	0	0	0	0	0	0	0	0	0	0	0	0	0	0	0	0	0	0	0	0	0
YEL066W	HPA3					FS	0	0	0	0	0	0	0	0	0	0	0	FS	0	0	0	0	0	0	0	0	0	0	0	0	0	0	0	0	0	0	0	0	0	0	0	0	0	0	0	0	0	0	0
YEL067C	YEL067C					Stop	0	Stop	Stop	0	Stop	Stop	0	Stop	Stop	Stop	Stop	Stop	Stop	Stop	0	0	Stop	Stop	Stop	Stop	Stop	Stop	0	Stop	0	0	Stop	Stop	Stop	0	0	Stop	Stop	Stop	Stop	Stop	Stop	Stop	0	0	Stop	Stop	Stop
YER001W	MNN1					Stop	0	0	0	0	0	0	0	0	0	0	0	Stop	0	0	0	0	0	0	0	0	0	0	0	0	0	0	0	0	0	0	0	0	0	0	0	0	0	0	0	0	0	0	0
YER028C	MIG3					0	0	0	0	0	FS	FS	0	0	0	0	0	0	0	0	0	0	0	0	0	0	0	0	0	0	0	0	0	0	0	Stop	Stop	0	0	0	0	0	0	0	FS	0	0	0	0
YER039C	HVG1					0	0	0	0	0	Stop	Stop	Stop	0	0	Stop	0	0	0	0	0	0	Stop	0	0	0	0	0	Stop	0	0	0	0	0	0	0	0	0	0	0	0	0	0	0	0	0	0	Stop	0
YER041W	YEN1					0	0	0	0	0	0	0	0	0	0	0	0	0	0	0	0	0	0	0	0	0	0	0	0	0	0	0	0	0	0	0	0	0	0	0	0	0	0	FS	0	0	0	0	0
YER049W	TPA1					0	0	0	0	0	0	0	0	0	0	0	0	0	0	0	0	0	0	0	0	0	0	0	0	0	0	0	0	0	0	0	0	0	0	0	0	0	0	0	0	FS	0	0	0
YER075C	PTP3					0	0	0	0	0	0	0	0	0	0	0	0	0	0	0	0	0	0	0	0	0	0	0	0	0	0	0	0	0	0	0	0	0	0	0	0	0	0	0	0	0	0	0	Stop
YER076C	YER076C					0	0	0	0	0	0	0	0	0	0	0	0	0	0	0	0	0	0	FS	0	0	0	0	0	0	0	0	0	0	0	0	0	FS	0	Stop	0	0	0	0	0	0	0	0	0
YER089C	PTC2					FS	0	0	0	0	0	0	0	0	0	0	0	FS	0	0	0	0	0	FS	0	0	0	0	0	0	0	0	0	0	FS	0	0	0	0	0	0	0	0	0	0	0	0	0	0
YER098W	UBP9					0	0	0	0	0	0	0	0	0	0	0	0	0	0	0	0	0	0	0	0	0	0	0	0	0	0	0	0	0	0	0	0	0	0	0	0	0	0	0	0	0	0	0	0
YER101C	AST2					0	0	0	FS	0	0	0	0	0	0	0	0	0	0	FS	0	0	0	0	0	0	0	0	0	0	0	0	0	0	0	0	0	0	0	0	0	0	0	0	0	0	0	0	0
YER114C	BOI2					0	0	0	0	0	FS	FS	0	0	0	0	0	0	0	0	0	FS	0	0	0	0	0	0	FS	0	0	0	FS	0	0	0	0	FS	0	0	0	0	0	0	0	0	0	0	0
YER129W	SAK1					0	0	0	0	0	0	0	0	0	0	0	0	0	0	0	0	0	0	0	0	0	0	0	0	0	0	0	0	0	0	0	0	0	0	0	0	0	0	0	0	0	0	0	0
YER132C	PMD1					0	0	0	0	0	0	0	0	0	0	0	0	0	0	0	0	0	0	0	0	0	0	0	0	0	0	0	0	0	0	Stop	0	0	0	0	0	0	0	0	0	0	0	0	0
YER141W	COX15					0	0	0	0	0	0	0	0	0	0	0	0	0	0	0	0	0	0	0	0	0	0	0	0	0	0	0	0	0	0	0	0	0	0	0	0	0	0	0	0	0	0	0	0
YER170W	ADK2					FS	FS	FS	FS	FS	FS	FS	FS	FS	FS	FS	FS	FS	FS	FS	FS	FS	FS	FS	FS	FS	FS	FS	FS	FS	FS	FS	FS	FS	FS	FS	FS	FS	FS	FS	FS	FS	FS	FS	FS	FS	FS	FS	FS
YER184C	YER184C					0	0	0	0	0	0	0	0	0	0	0	0	0	0	0	0	0	0	0	0	0	0	0	0	0	0	0	0	0	0	0	0	0	0	0	0	0	0	0	0	0	0	0	0
YER185W	PUG1					0	0	0	0	0	0	0	0	0	0	0	0	0	0	0	0	0	0	0	0	0	0	0	0	0	0	0	0	0	0	0	0	0	0	0	0	0	0	0	0	0	0	0	0
YER186C	YER186C					FS	0	FS	FS	FS	FS	FS	0	FS	FS	Stop	FS	FS	0	FS	0	FS	FS	FS	FS	0	FS	Stop	0	FS	FS	FS	Stop	Stop	FS	0	0	0	0	0	0	FS	FS	0	0	FS	0	Stop	0
YFL026W	STE2					0	0	0	0	0	0	0	0	0	0	0	0	0	0	0	0	0	0	FS	0	0	0	0	0	0	0	0	0	0	0	0	0	0	0	0	0	0	0	0	0	0	0	0	0
YFL027C	GYP8					0	0	0	0	0	0	0	0	0	0	0	0	0	0	0	0	0	0	0	0	0	0	0	0	0	0	0	0	0	0	0	0	0	0	0	0	0	0	0	0	0	0	0	0
YFL041W-A	YFL041W-A					0	0	0	0	0	0	0	0	0	0	0	0	0	0	0	0	0	0	0	0	0	0	0	0	0	Stop	0	0	0	0	0	0	0	Stop	0	0	0	0	FS	0	0	0	0	0
YFR018C	YFR018C					0	0	0	0	0	0	0	0	0	0	0	0	0	0	0	0	FS	0	0	0	0	0	0	0	0	0	0	0	0	0	0	0	0	0	0	0	0	0	0	0	0	0	0	0
YFR022W	ROG3					0	0	0	0	0	0	0	0	0	0	0	0	0	0	0	0	0	0	0	0	0	0	0	0	0	0	0	0	0	0	0	0	0	0	0	0	0	0	0	0	0	0	0	0
YFR025C	HIS2					0	0	0	0	0	0	0	0	0	0	0	0	0	0	0	0	0	Stop	0	0	0	0	0	0	0	0	0	0	0	0	0	0	0	0	0	0	0	0	0	0	0	0	0	0
YFR026C	ULI1					FS	FS	FS	0	FS	FS	FS	0	FS	FS	0	FS	FS	0	0	0	FS	0	FS	FS	0	FS	0	FS	FS	FS	FS	FS	FS	FS	0	0	0	FS	0	0	FS	0	0	0	FS	0	0	0
YFR045W	YFR045W					FS	0	FS	FS	0	FS	FS	0	FS	FS	FS	FS	FS	0	0	0	0	0	FS	FS	0	FS	0	FS	FS	FS	FS	0	FS	FS	0	0	0	0	0	0	FS	FS	FS	FS	0	0	FS	0
YGL004C	RPN14					0	0	0	0	0	0	0	0	0	0	0	0	0	0	0	0	0	0	0	0	0	0	0	0	0	0	0	0	FS	0	0	0	0	0	0	0	0	0	0	0	0	0	0	0
YGL021W	ALK1					0	0	0	0	0	0	0	0	0	0	0	0	FS	0	0	0	0	0	0	0	0	0	0	0	0	0	0	0	FS	0	0	0	0	0	0	0	0	0	FS	0	FS	0	0	0
YGL067W	NPY1					0	0	0	0	0	0	0	0	0	0	0	0	0	0	0	0	0	0	0	0	0	0	0	0	0	0	0	0	0	0	FS	0	0	0	0	0	0	0	0	0	0	0	0	0
YGL071W	AFT1					0	0	0	0	0	0	0	0	0	0	0	0	0	0	0	0	0	0	0	0	0	0	0	0	0	0	0	0	Stop	0	0	0	0	0	0	0	0	0	0	0	0	0	0	0
YGL080W	FMP37					0	0	0	0	0	0	0	FS	0	0	0	0	0	0	0	0	0	0	0	0	0	0	0	0	0	0	0	0	0	0	0	0	0	0	0	0	0	0	0	0	0	0	0	0
YGL086W	MAD1					0	FS	FS	FS	0	FS	FS	0	0	FS	0	0	0	0	0	0	FS	0	FS	FS	Stop	FS	0	0	FS	0	FS	0	FS	FS	0	0	0	0	0	0	0	0	0	0	0	0	0	FS
YGL089C	MF(ALPHA)2					0	0	0	0	0	0	0	0	0	0	0	0	0	0	0	0	0	0	0	0	0	0	0	0	0	0	0	0	0	0	0	0	0	0	0	0	0	0	0	0	0	0	0	0
YGL096W	TOS8					0	FS	0	0	0	0	0	0	0	0	0	0	0	0	0	0	0	0	0	0	0	0	0	0	0	0	0	FS	0	0	0	0	0	0	0	0	0	0	0	0	FS	0	0	0
YGL120C	PRP43	systematic mutation set	null	S288C	inviable	0	0	0	0	0	0	0	0	0	0	0	0	0	0	0	0	0	0	0	0	0	0	0	0	0	0	Stop	0	0	0	0	0	0	0	0	0	0	0	0	0	0	0	0	0
YGL134W	PCL10					0	0	0	0	0	0	0	0	0	0	0	0	0	0	0	0	0	0	0	0	0	0	0	0	0	0	0	0	0	0	0	FS	0	0	0	0	0	0	0	0	0	0	0	0
YGL157W	ARI1					0	0	0	0	0	Stop	Stop	0	0	0	0	0	0	0	0	0	0	0	0	0	0	0	0	0	0	0	0	0	0	0	0	0	0	0	0	0	0	0	0	0	0	0	0	0
YGL158W	RCK1					0	0	0	FS	FS	0	0	0	0	0	0	0	0	0	0	FS	0	FS	0	0	0	0	0	0	0	FS	FS	0	FS	0	0	0	0	0	0	0	0	0	0	0	0	0	0	0
YGL168W	HUR1					0	0	0	0	Stop	0	0	0	0	0	Stop	0	0	0	0	0	0	0	0	0	0	0	0	0	0	0	Stop	0	0	0	0	0	0	0	0	0	0	0	Stop	0	0	0	Stop	0
YGL179C	TOS3					0	0	0	0	0	0	0	0	0	0	0	0	0	0	0	0	0	0	0	0	0	0	0	0	0	0	0	0	0	0	0	0	0	0	0	0	0	0	FS	0	0	0	0	0
YGL192W	IME4					0	0	0	0	0	0	0	0	0	0	0	0	0	0	0	Stop	0	0	0	0	0	0	0	0	0	0	0	0	0	0	0	0	0	0	0	0	0	0	0	0	0	0	0	0
YGL193C	YGL193C					FS	0	FS	FS	0	FS	FS	0	FS	FS	0	FS	FS	0	0	0	0	FS	FS	FS	FS	FS	0	FS	FS	FS	FS	FS	FS	FS	0	0	0	0	0	0	FS	FS	0	0	FS	0	0	0
YGL196W	DSD1					FS	0	0	0	0	0	0	0	0	0	0	0	0	0	0	0	0	0	0	0	0	0	0	0	0	0	0	0	0	0	0	0	0	0	0	0	0	0	0	0	0	0	0	0
YGL202W	ARO8					0	0	0	0	0	0	0	0	0	0	0	0	0	0	0	0	0	0	0	0	0	0	0	0	0	0	0	0	0	0	0	0	0	0	0	0	0	0	0	0	0	0	0	0
YGL208W	SIP2					0	0	0	0	0	0	0	0	0	0	0	Stop	FS	0	0	0	0	0	0	0	0	0	0	0	0	0	0	0	0	0	0	0	0	0	0	0	0	0	0	0	0	0	0	0
YGL212W	VAM7					0	0	0	0	0	0	0	0	FS	0	0	FS	0	0	0	0	0	0	FS	0	0	0	0	0	0	0	0	0	0	0	0	0	0	0	0	0	0	0	0	0	0	0	0	0
YGL220W	FRA2					0	0	0	0	0	0	0	0	0	0	0	0	0	0	0	0	Stop	0	0	0	0	0	0	0	0	0	0	0	0	0	0	0	0	0	0	0	0	0	0	0	0	0	0	0
YGL228W	SHE10					0	0	0	0	0	0	0	0	0	0	0	0	0	0	0	0	0	0	0	0	0	0	0	0	0	0	0	0	0	0	0	0	0	0	0	0	0	0	0	0	0	0	0	0
YGL229C	SAP4					0	0	0	0	0	0	0	0	0	0	0	0	0	0	0	0	0	0	0	0	0	0	0	0	0	0	0	0	0	0	0	0	0	0	0	0	0	0	0	0	0	0	0	0
YGL235W	YGL235W					0	0	0	0	0	0	0	FS	0	0	0	0	0	0	0	0	0	0	0	0	0	0	0	0	0	0	0	0	0	0	0	0	0	0	0	0	0	0	0	0	0	0	0	0
YGL243W	TAD1					0	0	0	0	0	Stop	Stop	0	0	0	0	0	0	Stop	Stop	0	Stop	0	0	0	Stop	0	0	0	0	0	0	0	Stop	0	0	0	0	0	Stop	0	0	0	Stop	0	0	Stop	0	Stop
YGL257C	MNT2					0	0	0	0	0	0	0	0	0	0	0	0	0	0	0	0	0	0	0	0	0	0	FS	0	0	0	0	0	0	0	0	0	0	0	0	0	0	0	0	0	0	0	0	0
YGR035W-A	YGR035W-A					FS	FS	FS	FS	FS	0	FS	FS	FS	FS	0	FS	FS	0	FS	0	FS	FS	FS	FS	0	FS	0	FS	FS	0	FS	FS	0	FS	0	0	FS	0	0	0	FS	FS	0	FS	FS	0	0	0
YGR044C	RME1					0	0	0	0	0	0	0	0	0	0	0	0	FS	0	0	0	0	0	0	0	0	0	Stop	0	0	0	0	0	0	0	0	0	0	0	0	0	0	0	0	0	0	0	0	0
YGR052W	FMP48					0	0	0	0	0	0	0	0	0	0	0	0	0	0	0	Stop	0	0	0	0	0	0	0	0	0	0	0	0	0	0	0	0	0	0	Stop	0	0	0	0	0	0	0	0	0
YGR066C	YGR066C					0	0	0	0	0	0	0	0	0	0	0	0	0	0	0	0	0	0	0	0	0	0	0	0	0	0	0	0	0	0	0	0	0	0	0	0	0	0	0	0	0	0	0	0
YGR067C	YGR067C					0	0	0	0	0	0	0	0	0	0	0	0	0	0	0	0	0	0	0	0	0	0	0	0	0	FS	0	0	0	0	0	0	0	0	0	0	0	0	0	0	0	0	0	0
YGR079W	YGR079W					0	FS	0	0	0	0	0	FS	0	0	0	FS	0	0	0	0	0	0	0	0	0	0	0	0	0	0	FS	0	FS	0	FS	FS	0	0	FS	0	0	0	0	FS	0	0	0	0
YGR100W	MDR1					0	0	0	0	0	0	0	0	0	0	0	0	0	0	0	0	0	0	0	0	0	0	0	0	0	0	0	0	0	0	0	0	0	0	0	0	0	0	0	0	0	0	0	0
YGR121W-A	YGR121W-A					0	0	0	FS	FS	FS	FS	FS	0	0	FS	0	0	FS	FS	0	FS	0	0	0	0	0	FS	0	0	0	0	FS	FS	0	FS	FS	0	FS	FS	FS	0	0	FS	0	0	FS	FS	FS
YGR136W	LSB1					0	0	0	0	0	0	0	0	0	0	0	0	0	0	0	0	0	0	0	0	0	0	0	0	0	0	0	0	0	0	0	0	0	0	0	0	0	0	0	0	0	0	0	0
YGR140W	CBF2	systematic mutation set	null	S288C	inviable	0	FS	0	0	0	0	FS	FS	0	0	FS	0	0	FS	FS	0	FS	0	0	0	FS	0	FS	FS	0	0	0	0	FS	0	FS	FS	0	FS	FS	FS	0	0	FS	FS	0	FS	FS	FS
YGR146C-A	YGR146C-A					0	FS	0	FS	FS	0	FS	FS	FS	FS	FS	0	0	FS	FS	FS	FS	FS	FS	FS	FS	0	FS	0	FS	0	0	FS	FS	FS	FS	Stop	FS	FS	FS	FS	FS	FS	FS	FS	FS	FS	FS	FS
YGR154C	GTO1					0	0	0	0	0	0	0	0	0	0	0	0	0	0	0	0	0	0	0	0	FS	0	0	0	0	0	0	0	0	0	0	0	0	0	0	0	0	0	0	0	0	0	0	FS
YGR171C	MSM1					0	0	0	0	0	0	0	0	0	0	0	0	0	0	0	0	0	0	0	0	0	0	0	0	0	0	0	0	0	0	0	0	0	0	0	0	0	0	0	0	0	0	0	0
YGR174C	CBP4					Stop	0	0	0	0	0	0	0	0	0	0	0	Stop	0	0	0	0	0	0	0	0	0	0	0	0	0	0	0	0	0	0	0	0	0	0	0	0	0	0	0	0	0	0	0
YGR184C	UBR1					0	0	0	0	0	0	0	0	0	0	0	0	0	0	0	0	0	0	0	0	0	0	0	0	0	0	0	0	0	0	0	0	0	0	0	0	0	0	0	0	0	0	0	0
YGR197C	SNG1					0	FS	0	0	0	0	0	0	0	0	0	0	0	0	0	0	0	0	0	0	0	FS	0	0	0	0	0	0	FS	0	0	0	0	0	0	0	0	0	0	0	0	0	0	0
YGR212W	SLI1					0	0	0	0	0	0	0	0	0	0	0	0	0	0	0	0	0	0	0	0	0	0	0	0	0	0	0	0	0	0	0	0	0	0	0	0	0	0	0	0	0	0	0	0
YGR213C	RTA1					0	0	0	0	0	0	0	0	0	0	Stop	0	0	0	0	0	0	0	0	0	0	0	0	0	0	0	0	0	0	0	0	0	0	0	0	0	0	0	0	0	0	0	Stop	0
YGR221C	TOS2					0	0	0	0	0	0	0	0	0	0	0	0	0	0	0	0	0	0	0	0	0	0	0	0	0	0	0	0	0	0	0	0	0	0	0	0	0	0	0	0	0	0	0	0
YGR224W	AZR1					0	0	FS	0	0	0	0	0	FS	0	0	0	0	0	0	0	0	0	0	0	0	FS	0	0	0	0	0	0	0	0	0	0	0	0	0	0	0	0	0	0	0	0	0	0
YGR235C	YGR235C					0	0	0	0	0	0	0	0	0	0	0	0	0	0	0	0	0	0	0	0	0	0	0	0	0	0	0	0	0	0	0	0	0	0	0	0	0	0	0	0	0	0	0	0
YGR238C	KEL2					0	0	0	0	0	0	0	0	0	0	0	0	0	0	0	0	0	0	0	0	0	0	0	0	0	0	0	FS	0	0	0	0	0	0	0	0	0	0	0	0	0	0	0	0
YGR248W	SOL4					0	0	0	0	0	0	0	0	0	0	0	0	0	0	0	0	0	0	0	0	0	0	0	0	0	0	0	0	0	0	0	0	0	0	0	0	0	0	0	FS	0	0	0	0
YGR249W	MGA1					0	Stop	0	0	0	0	0	0	0	0	0	0	0	0	0	0	0	0	0	0	0	0	0	0	0	0	0	FS	0	0	Stop	Stop	0	0	0	0	0	0	0	FS	0	0	0	0
YGR256W	GND2					0	0	0	0	0	0	0	0	0	0	0	0	0	0	0	0	0	0	0	0	0	0	0	0	0	0	0	0	0	0	0	0	0	0	0	0	0	0	0	0	0	0	0	0
YGR271W	SLH1					0	Stop	0	0	0	0	0	0	0	0	0	0	0	0	0	0	0	0	0	0	0	0	0	0	0	0	0	0	0	0	0	0	0	0	0	0	0	0	0	0	0	0	0	0
YGR273C	YGR273C					0	0	0	0	0	0	0	0	0	0	0	0	0	0	0	0	0	0	0	0	0	0	0	0	0	0	0	0	0	0	0	0	0	0	0	0	0	0	0	0	0	0	0	0
YHL008C	YHL008C					0	0	0	0	0	0	0	0	0	0	0	0	0	0	0	0	0	0	0	0	0	0	0	0	0	0	0	0	0	0	0	0	Stop	0	0	0	0	0	0	0	0	0	0	0
YHL012W	YHL012W					0	Stop	0	0	0	0	0	0	0	0	0	0	0	0	0	0	0	0	0	0	0	0	FS	0	0	0	0	0	Stop	0	0	0	0	0	0	0	0	0	0	0	0	0	0	Stop
YHL016C	DUR3					0	0	0	0	0	0	0	0	0	0	0	0	0	0	0	0	0	0	0	0	0	0	0	0	0	0	0	0	0	0	0	0	0	0	0	0	0	0	0	0	0	0	0	0
YHL018W	YHL018W					0	0	0	0	0	0	0	0	0	0	0	0	0	0	0	0	0	0	0	FS	0	0	0	0	0	0	0	0	0	0	0	0	0	0	0	0	0	0	0	0	0	0	0	0
YHL026C	YHL026C					0	0	0	0	0	0	0	0	0	0	0	0	0	0	0	0	0	0	0	0	0	0	0	0	0	0	0	0	0	0	0	0	0	0	0	0	0	0	0	0	0	0	0	0
YHL035C	VMR1					0	0	0	0	0	Stop	Stop	0	0	0	Stop	0	0	0	Stop	0	0	0	0	0	0	0	0	0	0	0	0	0	0	0	0	0	0	0	0	0	0	0	0	0	0	0	Stop	0
YHL039W	EFM1					0	0	0	0	0	0	0	0	0	0	0	0	0	0	0	0	0	0	0	0	0	0	0	0	0	0	0	0	0	0	0	0	0	0	0	0	0	0	0	0	0	0	0	0
YHR007C-A	YHR007C-A					FS	FS	0	FS	FS	FS	FS	FS	0	0	FS	0	FS	FS	FS	FS	FS	FS	FS	0	0	0	FS	FS	0	FS	FS	FS	0	0	FS	FS	Stop	FS	FS	FS	0	0	FS	FS	0	FS	FS	FS
YHR021W-A	ECM12					FS	Stop	0	0	Stop	0	0	Stop	0	0	Stop	0	FS	Stop	0	0	0	Stop	0	0	0	0	FS	0	0	Stop	0	Stop	Stop	0	Stop	Stop	Stop	FS	FS	Stop	0	0	FS	0	0	Stop	Stop	0
YHR022C-A	YHR022C-A					0	0	0	0	0	0	0	0	0	0	0	0	0	0	0	0	0	0	0	0	0	0	0	0	0	0	0	0	0	0	0	0	0	0	0	0	0	0	Stop	0	0	0	0	0
YHR029C	YHI9					0	0	0	0	0	0	0	0	0	0	0	FS	0	0	0	0	0	0	0	0	0	0	0	0	0	0	0	0	0	0	0	0	0	0	0	0	0	0	0	0	0	0	0	0
YHR032W	ERC1					FS	FS	FS	FS	FS	FS	FS	FS	FS	FS	FS	FS	FS	FS	FS	FS	FS	FS	FS	FS	FS	FS	FS	FS	FS	FS	FS	FS	FS	FS	FS	FS	FS	FS	FS	FS	FS	FS	FS	FS	FS	FS	FS	FS
YHR035W	YHR035W					0	0	0	0	0	0	0	0	0	0	0	0	0	0	0	0	0	0	0	0	0	0	0	0	0	0	0	0	0	0	0	0	0	0	0	0	0	0	0	0	0	0	0	0
YHR048W	YHK8					0	0	0	0	0	0	0	0	Stop	0	0	0	0	0	0	0	0	0	0	0	0	0	0	0	0	0	0	0	0	0	0	0	0	0	0	0	0	0	0	0	0	0	0	0
YHR084W	STE12					0	0	0	0	0	0	0	0	0	0	0	0	0	0	0	FS	0	0	0	0	0	0	0	0	0	0	0	0	0	0	0	0	0	Stop	0	0	0	0	0	0	0	0	0	0
YHR104W	GRE3					0	0	0	0	0	0	0	0	0	0	0	0	0	0	0	0	0	0	0	0	0	0	0	0	0	0	0	0	0	0	0	0	0	0	0	0	0	0	0	0	0	0	0	0
YHR132C	ECM14					0	0	0	0	0	0	0	0	0	0	0	0	0	0	0	0	0	0	0	0	0	0	0	0	0	0	0	0	0	0	0	0	0	0	0	0	0	0	0	0	0	0	0	0
YHR133C	NSG1					0	0	0	0	0	0	0	0	0	0	0	0	0	0	0	0	0	0	0	0	0	0	0	0	0	0	0	0	0	0	0	0	0	0	0	0	0	0	0	0	0	0	0	0
YHR136C	SPL2					Stop	0	0	0	0	0	0	0	0	0	0	0	0	0	0	0	0	0	0	0	0	0	0	0	0	0	0	0	0	0	0	0	0	0	0	0	0	0	0	0	0	0	0	0
YHR170W	NMD3	classical genetics	null	Other	inviable	0	0	0	0	0	0	0	0	0	0	0	0	0	0	0	0	0	0	0	0	0	0	0	0	0	0	0	0	0	0	0	0	Stop	0	0	0	0	0	0	0	0	0	0	0
YHR175W	CTR2					Stop	0	0	0	0	0	0	0	0	0	0	0	0	0	0	0	0	0	0	0	0	0	0	0	0	0	0	0	0	0	0	0	0	0	0	0	0	0	0	0	0	0	0	0
YIL005W	EPS1					0	0	0	0	0	0	0	0	0	0	0	0	0	0	0	0	0	0	0	0	0	0	0	0	0	0	0	0	0	0	0	0	0	0	0	0	0	0	0	0	0	0	0	0
YIL013C	PDR11					0	0	0	0	0	0	0	0	0	0	0	0	0	0	0	0	0	0	0	0	0	0	0	FS	0	0	0	0	0	0	0	0	0	0	0	0	0	0	0	0	0	0	0	0
YIL050W	PCL7					0	0	0	0	0	0	0	0	0	0	0	0	0	0	0	0	0	0	0	0	0	0	0	0	0	0	0	0	0	0	0	0	Stop	0	0	0	0	0	0	0	0	0	0	0
YIL064W	SEE1					0	0	0	0	0	0	0	FS	0	0	0	0	0	0	0	0	0	0	0	0	0	0	0	0	0	0	0	0	0	0	0	0	0	0	0	0	0	0	0	0	0	0	0	0
YIL077C	YIL077C					0	0	0	0	0	0	0	0	0	0	0	0	0	0	0	0	0	0	0	0	0	0	0	0	0	0	0	0	0	0	0	0	0	0	0	0	0	0	0	0	0	0	0	0
YIL096C	YIL096C					0	0	0	0	0	0	0	0	0	0	0	0	0	0	0	0	0	0	0	FS	0	0	0	0	0	0	0	0	0	0	0	0	0	0	0	0	0	0	0	0	0	0	0	0
YIL099W	SGA1					0	0	0	0	0	0	0	0	0	0	0	0	0	0	0	0	0	0	0	0	0	0	0	0	0	0	0	0	0	0	0	0	0	0	0	0	0	0	0	0	0	0	0	0
YIL101C	XBP1					0	0	0	0	0	0	0	0	0	0	0	0	0	0	0	0	0	0	0	0	0	0	0	0	0	0	0	0	0	0	0	0	0	0	0	0	0	0	0	0	0	0	0	0
YIL114C	POR2					0	0	0	0	0	0	0	0	0	0	0	0	0	0	0	0	0	0	0	0	0	0	0	0	0	0	0	0	0	0	0	0	0	0	0	0	0	0	0	0	0	0	0	0
YIL120W	QDR1					0	Stop	0	0	0	0	0	0	0	0	0	0	0	0	0	0	0	0	0	0	0	0	0	0	0	0	0	0	0	0	0	0	0	0	0	0	0	0	0	0	0	0	0	0
YIL125W	KGD1					0	0	0	0	0	0	0	0	0	0	0	0	0	0	0	0	0	0	0	0	0	0	0	0	0	0	0	0	0	0	0	0	0	0	0	0	0	0	0	0	0	0	0	0
YIL131C	FKH1					0	0	0	0	0	0	0	0	0	0	0	0	0	0	0	0	Stop	0	0	0	0	0	0	0	0	0	0	0	0	0	0	0	0	0	0	0	0	0	0	0	0	0	0	0
YIL134C-A	YIL134C-A					0	Stop	0	0	0	0	0	0	0	0	0	0	0	0	0	FS	0	0	0	0	0	0	0	0	0	0	0	FS	0	0	FS	0	FS	0	0	0	0	0	0	0	0	0	0	0
YIL145C	PAN6					0	0	0	0	0	0	0	FS	0	0	0	0	0	0	0	0	0	0	0	0	0	0	0	0	0	0	0	0	0	0	0	0	0	0	0	0	0	0	0	0	0	0	0	0
YIL149C	MLP2					0	0	0	0	0	0	0	0	0	0	0	0	0	0	0	0	0	0	0	0	0	0	0	0	0	0	0	0	0	0	0	0	0	Stop	0	0	0	0	0	0	0	0	0	0
YIL156W-B	YIL156W-B					0	0	0	0	0	0	0	0	0	0	0	0	0	0	0	0	0	0	0	0	0	0	0	Stop	0	0	0	0	0	0	0	0	0	0	0	0	0	0	0	0	0	0	0	0
YIL158W	AIM20					0	0	0	0	0	0	0	0	0	0	0	0	0	0	0	0	0	0	0	0	0	0	0	0	0	0	0	0	0	0	0	0	0	0	0	0	0	0	0	0	0	0	0	0
YIL161W	YIL161W					0	0	0	0	0	0	0	0	0	0	0	0	0	0	0	0	0	0	0	0	FS	0	0	0	0	0	0	0	0	0	0	0	0	0	0	0	0	0	0	0	FS	0	0	0
YIR010W	DSN1	classical genetics	reduction of function	S288C	inviable	0	0	0	0	0	0	0	0	0	0	0	0	0	0	0	0	0	0	0	0	0	0	0	0	0	0	0	0	0	0	0	0	0	0	0	0	0	0	0	0	0	0	0	0
YIR018C-A	YIR018C-A					FS	FS	FS	0	FS	FS	FS	FS	FS	FS	FS	0	0	0	0	0	FS	FS	FS	FS	FS	FS	0	0	FS	FS	0	FS	FS	FS	FS	FS	FS	FS	0	FS	FS	FS	FS	FS	FS	FS	FS	0
YIR024C	YIR024C					0	0	0	0	0	0	0	0	0	0	0	0	0	0	0	0	0	0	0	0	0	0	0	0	0	0	0	0	0	0	0	0	0	0	0	FS	0	0	0	0	0	0	0	0
YIR028W	DAL4					0	0	0	0	0	0	0	0	0	0	FS	0	0	0	0	0	0	0	0	0	0	Stop	0	0	0	0	0	0	0	0	0	0	0	0	0	0	Stop	0	0	0	0	0	FS	0
YJL027C	YJL027C					0	0	0	0	0	0	0	0	0	0	0	0	0	0	0	0	0	0	0	0	0	0	0	0	0	0	0	0	0	0	0	0	Stop	0	0	0	0	0	0	0	0	0	0	0
YJL028W	YJL028W					FS	FS	FS	FS	FS	FS	FS	FS	FS	FS	FS	FS	FS	FS	FS	FS	FS	FS	FS	FS	FS	FS	FS	FS	FS	FS	FS	FS	0	FS	0	0	FS	FS	FS	FS	FS	FS	FS	FS	FS	FS	FS	FS
YJL045W	YJL045W					0	FS	0	0	0	0	0	FS	0	0	0	0	0	0	0	0	0	0	0	0	0	0	0	0	0	0	0	0	0	0	0	0	0	0	0	0	0	0	0	0	0	0	0	0
YJL073W	JEM1					0	0	0	0	0	0	0	0	0	0	0	0	0	0	0	0	0	0	0	0	0	0	0	0	0	0	0	0	0	0	0	0	0	0	0	0	0	0	0	0	0	0	0	0
YJL083W	TAX4					0	0	0	0	0	0	0	0	0	0	0	0	0	0	0	0	0	0	0	0	0	0	0	0	0	0	0	0	0	0	0	0	0	0	0	0	0	0	0	0	0	0	0	0
YJL084C	ALY2					0	0	0	0	0	0	0	0	0	0	0	0	0	0	0	0	0	0	0	0	0	0	0	0	0	0	0	0	0	0	0	0	0	0	0	0	0	0	0	0	0	0	0	0
YJL089W	SIP4					0	0	0	0	0	0	0	0	0	0	0	0	0	0	0	0	0	0	0	0	0	0	0	0	0	0	0	0	0	0	0	0	0	0	0	0	0	0	0	0	0	0	0	0
YJL100W	LSB6					0	0	0	Stop	0	0	0	0	0	0	0	0	0	0	0	0	0	0	0	0	0	0	0	0	0	0	0	0	0	0	0	0	0	0	0	0	0	0	0	0	0	0	0	0
YJL103C	GSM1					0	0	0	0	0	0	0	0	0	0	0	0	0	0	0	0	0	0	0	0	0	0	0	0	0	0	0	0	0	0	0	0	0	0	0	0	0	0	0	0	0	0	0	0
YJL104W	PAM16	classical genetics	null	S288C	inviable	0	0	0	0	0	0	0	0	0	0	0	0	0	0	0	0	0	0	0	0	0	0	0	0	0	0	0	0	0	0	0	0	0	0	0	0	0	0	0	0	0	0	0	0
YJL107C	YJL107C					FS	FS	FS	FS	FS	FS	FS	FS	FS	FS	FS	FS	FS	FS	FS	FS	FS	FS	FS	FS	FS	FS	FS	FS	FS	FS	FS	FS	FS	FS	FS	FS	FS	FS	FS	FS	FS	FS	FS	FS	FS	FS	FS	FS
YJL110C	GZF3					0	0	0	0	0	0	0	0	0	0	0	0	0	0	0	0	0	0	0	0	0	0	0	0	0	0	0	0	0	0	Stop	0	Stop	0	Stop	0	0	0	0	0	0	0	0	0
YJL129C	TRK1					0	0	0	0	0	0	0	0	0	0	0	0	0	0	0	Stop	0	0	0	0	0	0	0	0	0	0	Stop	0	0	0	FS	0	0	0	0	0	0	0	0	0	0	0	0	0
YJL136W-A	YJL136W-A					0	0	0	0	0	0	0	0	0	0	0	0	0	0	0	0	0	0	0	0	0	0	FS	0	0	0	0	0	0	0	0	0	0	0	0	0	0	0	0	0	0	0	0	0
YJL137C	GLG2					0	0	0	0	0	0	0	0	0	0	0	FS	0	0	0	FS	0	0	0	0	0	0	0	0	0	0	0	0	Stop	0	0	0	0	0	0	0	0	0	0	0	0	0	0	0
YJL144W	YJL144W					0	0	0	FS	0	0	0	0	0	0	0	0	0	0	0	0	0	0	0	0	0	0	0	0	0	0	0	0	0	0	0	0	0	0	0	0	0	0	0	0	0	0	0	0
YJL146W	IDS2					0	0	0	0	0	0	0	0	0	0	0	0	Stop	0	0	0	0	0	0	0	0	0	0	0	0	0	0	0	0	0	0	0	0	0	0	0	0	0	0	0	0	0	0	0
YJL165C	HAL5					0	0	0	0	0	0	0	0	0	0	0	0	0	0	0	0	0	0	0	0	0	0	0	FS	0	0	0	0	0	0	0	0	0	0	0	0	0	0	0	0	0	0	0	0
YJL181W	YJL181W					0	0	0	0	0	0	0	0	0	0	0	0	0	0	0	0	0	0	0	0	0	0	0	0	0	0	0	0	0	0	0	0	0	0	0	0	0	0	0	0	0	0	0	0
YJL186W	MNN5					0	0	0	0	0	0	0	0	0	0	FS	0	0	0	0	0	0	0	0	0	0	0	0	0	0	0	0	0	0	0	0	0	0	0	0	0	0	0	0	0	0	0	FS	0
YJL207C	LAA1					0	0	0	0	0	0	0	0	0	0	0	FS	0	0	0	0	0	0	0	0	0	0	0	0	0	0	0	0	0	0	0	0	0	0	0	0	0	0	0	0	0	0	0	0
YJL213W	YJL213W					0	0	0	0	0	0	0	0	0	0	0	0	0	0	0	FS	0	0	0	0	0	0	0	0	0	0	0	0	0	0	0	0	0	0	0	0	0	0	0	0	0	0	0	0
YJR031C	GEA1					0	0	0	0	0	0	0	0	0	0	0	0	0	0	0	0	0	0	0	0	0	0	0	0	0	0	0	0	0	0	0	0	0	0	0	0	0	Stop	0	0	0	0	0	0
YJR062C	NTA1					0	0	0	0	0	0	0	0	0	0	0	0	0	0	0	FS	0	0	0	0	0	0	0	0	0	0	0	0	0	0	0	0	0	0	0	0	0	0	0	0	0	0	0	0
YJR092W	BUD4					0	FS	0	0	0	0	0	0	0	0	0	0	0	0	0	0	0	0	0	0	0	0	FS	0	0	0	0	0	FS	0	0	0	0	0	0	0	0	0	0	0	0	0	0	0
YJR096W	YJR096W					0	0	0	0	0	0	0	0	0	0	0	0	0	0	0	0	0	0	0	0	0	0	0	0	0	0	0	0	0	0	0	0	0	0	0	0	0	0	0	0	0	0	0	0
YJR098C	YJR098C					0	0	0	0	0	0	0	0	0	0	0	0	0	0	0	0	0	0	0	0	0	0	0	0	Stop	0	0	0	0	0	0	0	0	0	0	0	0	0	0	0	0	0	0	0
YJR105W	ADO1					0	0	0	0	0	0	0	0	0	FS	0	0	0	0	0	0	0	0	0	0	0	0	0	0	0	0	0	0	0	0	0	0	0	0	0	0	0	0	0	0	0	0	0	0
YJR112W-A	YJR112W-A					0	0	0	0	0	0	0	0	0	0	0	0	0	0	0	Stop	0	0	0	0	0	0	0	0	0	0	0	0	0	0	0	0	0	0	0	0	0	0	Stop	0	0	0	0	0
YJR120W	YJR120W					0	0	0	Stop	0	0	0	0	Stop	0	0	0	0	0	Stop	0	0	0	0	0	0	0	0	Stop	0	0	0	0	0	0	0	0	0	0	FS	0	0	0	0	0	0	0	0	0
YJR126C	VPS70					0	0	FS	FS	0	0	0	0	0	FS	0	FS	0	FS	FS	0	FS	FS	FS	FS	FS	0	0	FS	FS	0	FS	0	0	FS	0	0	FS	0	FS	FS	FS	FS	FS	0	0	FS	0	FS
YJR127C	RSF2					Stop	0	0	0	0	0	0	0	0	0	0	0	Stop	FS	0	0	0	0	0	0	0	0	FS	0	0	0	0	0	0	0	0	0	Stop	0	0	FS	0	0	FS	0	0	FS	0	0
YJR147W	HMS2					0	0	0	0	0	0	0	0	0	0	0	0	0	0	0	0	0	0	0	0	0	0	0	0	0	0	0	0	0	0	0	0	0	0	0	0	0	0	0	0	0	0	0	0
YJR152W	DAL5					0	0	0	FS	FS	FS	FS	0	FS	FS	0	0	0	0	0	0	FS	FS	0	FS	0	0	0	0	FS	0	0	0	0	FS	0	0	0	0	0	0	FS	FS	0	0	FS	0	0	0
YJR154W	YJR154W					0	0	0	0	0	0	0	0	0	0	0	0	Stop	0	0	0	0	0	0	0	0	0	0	0	0	0	0	0	0	0	0	0	0	0	0	0	0	0	0	0	0	0	0	0
YKL021C	MAK11	systematic mutation set	null	S288C	inviable	0	0	0	0	0	0	0	0	FS	0	0	0	0	0	0	0	0	0	0	0	0	0	0	0	0	0	0	0	0	0	0	0	FS	0	FS	0	0	0	0	0	0	0	0	0
YKL022C	CDC16	systematic mutation set	null	S288C	inviable	0	0	0	0	0	0	0	0	0	0	0	0	0	0	0	0	0	0	0	0	0	0	0	0	0	0	0	0	0	0	0	0	0	0	0	0	0	0	0	0	0	0	0	0
YKL023C-A	YKL023C-A					0	0	0	0	0	0	0	0	0	0	0	0	0	0	0	0	0	0	0	0	0	0	0	0	0	0	0	0	0	0	0	0	0	0	0	0	0	0	0	0	0	0	0	0
YKL028W	TFA1	classical genetics	null	S288C	inviable	0	0	0	0	0	0	0	0	0	0	0	FS	FS	0	FS	0	0	0	0	0	0	0	0	0	0	0	0	0	0	0	0	0	0	0	0	0	0	0	0	0	0	0	0	FS
YKL037W	AIM26	homozygous diploid, systematic mutation set	null	SK1	inviable	0	0	0	0	0	0	0	0	0	0	0	0	0	0	0	0	0	0	0	0	0	0	Stop	0	0	0	0	0	0	0	0	0	0	0	0	0	0	0	0	0	0	0	0	0
YKL043W	PHD1					0	0	0	0	0	0	0	0	0	0	0	0	0	0	0	0	0	0	0	0	0	0	0	0	0	0	0	0	0	0	0	0	0	Stop	0	0	0	0	0	0	0	0	0	0
YKL050C	YKL050C					0	0	0	0	0	0	0	0	0	0	0	0	0	0	0	0	0	0	0	0	0	0	0	0	0	0	0	0	0	0	0	0	0	0	0	0	0	0	0	0	0	0	0	0
YKL068W-A	YKL068W-A					0	0	0	0	0	0	0	0	0	0	0	0	0	0	0	0	0	0	0	0	0	0	0	0	0	0	0	0	0	0	0	0	0	0	0	0	0	0	0	0	0	0	0	Stop
YKL070W	YKL070W					0	FS	0	0	0	0	FS	FS	0	0	0	0	0	Stop	0	FS	FS	FS	0	0	0	0	0	0	0	0	0	Stop	FS	0	FS	FS	Stop	0	Stop	FS	0	0	FS	FS	FS	Stop	0	0
YKL071W	YKL071W					0	0	0	0	0	0	0	0	0	0	0	0	0	0	0	0	0	0	0	0	0	0	0	0	0	0	0	0	0	0	0	0	0	0	0	0	0	0	0	0	0	0	0	0
YKL084W	HOT13					0	0	0	0	0	0	0	0	0	0	0	0	0	0	0	0	0	0	0	0	0	0	0	0	0	0	0	0	0	0	0	0	0	0	0	0	0	0	0	0	0	0	0	0
YKL089W	MIF2	classical genetics	null	Other	inviable	0	0	0	0	0	0	0	0	0	0	0	0	0	0	0	0	0	0	0	0	0	0	0	0	0	0	0	0	0	0	0	0	0	0	0	0	0	0	0	0	0	0	0	FS
YKL093W	MBR1					0	0	0	0	0	0	0	0	0	0	0	0	0	0	0	0	0	0	0	0	Stop	0	0	0	0	0	0	0	0	0	0	0	0	0	0	0	0	0	0	0	0	0	0	0
YKL101W	HSL1					0	0	0	0	0	0	0	0	0	0	0	0	0	0	0	0	0	0	0	0	0	0	0	0	0	0	0	0	0	0	0	0	0	0	0	0	0	0	0	0	0	0	0	0
YKL114C	APN1					0	0	0	0	0	0	0	0	0	0	0	0	0	0	0	0	0	0	0	0	0	0	Stop	0	0	0	0	0	0	0	0	0	0	0	0	0	0	0	0	0	0	0	0	0
YKL132C	RMA1					0	0	0	0	0	0	0	0	0	0	0	0	0	0	0	0	0	0	0	0	0	0	0	0	0	0	0	0	0	0	0	0	FS	0	0	0	0	0	0	0	0	0	0	0
YKL162C	YKL162C					0	0	0	0	0	0	0	0	0	0	0	0	0	0	0	0	0	0	0	0	0	0	0	0	0	0	0	0	0	0	0	0	0	0	0	0	0	0	Stop	0	0	0	0	0
YKL189W	HYM1	systematic mutation set	null	S288C	inviable	0	0	0	0	0	0	0	0	0	0	0	0	0	0	0	0	0	0	0	0	0	0	0	0	0	0	0	0	0	0	0	0	0	0	0	0	0	0	0	0	0	0	0	Stop
YKL198C	PTK1					FS	FS	FS	FS	FS	FS	FS	FS	FS	FS	FS	FS	FS	FS	FS	FS	FS	FS	FS	FS	FS	FS	FS	FS	FS	FS	FS	FS	FS	FS	FS	FS	FS	FS	FS	FS	FS	FS	FS	FS	FS	FS	FS	FS
YKL209C	STE6					0	0	0	0	0	0	0	0	0	0	0	0	0	0	0	0	0	0	0	0	0	0	0	0	0	0	0	0	0	0	0	0	Stop	0	0	0	0	0	0	0	0	0	0	0
YKR005C	YKR005C					0	0	0	0	0	0	0	0	0	0	0	0	0	0	0	0	0	0	0	0	0	0	0	0	Stop	0	0	0	0	0	0	0	0	0	0	0	0	0	0	0	0	0	0	0
YKR015C	YKR015C					0	0	0	0	0	0	0	0	0	0	0	0	0	0	0	0	0	0	0	0	0	0	0	0	0	0	0	0	Stop	0	0	0	0	0	0	0	0	0	0	0	0	0	0	0
YKR041W	YKR041W					FS	0	0	0	0	0	0	0	0	0	0	0	FS	0	0	0	0	0	0	0	0	0	0	0	0	0	0	0	0	0	0	0	0	0	0	0	0	0	0	0	0	0	0	0
YKR061W	KTR2					0	0	0	0	0	0	0	0	0	0	0	0	0	0	0	0	Stop	0	0	0	0	0	0	0	0	0	0	0	0	0	0	0	0	0	0	0	0	0	0	0	0	0	0	0
YKR064W	OAF3					0	0	0	0	0	0	0	0	0	0	0	0	0	0	0	0	0	0	0	0	0	0	0	0	0	0	0	0	0	0	0	0	0	0	0	0	0	0	0	0	0	0	0	0
YKR076W	ECM4					0	0	0	0	0	0	0	0	0	0	0	0	0	0	0	0	0	0	0	0	0	0	0	0	0	0	0	0	0	0	0	0	0	0	0	0	0	0	0	0	0	0	0	0
YKR093W	PTR2					0	0	0	0	0	0	0	0	FS	0	0	0	0	0	0	0	0	FS	FS	0	0	0	0	0	0	0	0	0	0	0	0	0	0	0	0	0	FS	0	0	0	FS	0	0	0
YKR096W	YKR096W					0	0	0	0	0	0	0	0	0	0	0	0	0	0	0	0	0	0	0	0	0	0	0	0	0	0	0	0	0	0	0	0	0	0	0	0	0	0	0	0	0	0	0	0
YKR098C	UBP11					0	0	0	0	0	0	0	0	0	0	0	0	FS	0	0	0	0	0	0	0	0	0	0	0	0	0	0	0	0	0	0	0	0	0	0	0	0	0	0	0	0	0	0	0
YLL006W-A	YLL006W-A					FS	FS	FS	FS	FS	FS	FS	FS	FS	FS	FS	FS	FS	FS	FS	FS	FS	FS	FS	FS	FS	FS	FS	FS	FS	FS	FS	FS	FS	FS	FS	FS	FS	FS	FS	FS	FS	FS	FS	FS	FS	FS	FS	FS
YLL014W	EMC6					0	0	0	0	0	0	0	0	0	0	0	0	0	0	0	0	0	0	0	0	0	0	0	0	0	0	0	0	0	0	0	0	0	0	0	0	0	0	0	0	0	0	0	0
YLL018C-A	COX19					0	0	0	0	0	0	0	0	0	0	0	0	0	0	0	0	0	0	0	0	0	0	0	0	0	0	0	0	0	0	0	0	0	0	0	0	0	0	0	0	0	0	0	0
YLL046C	RNP1					0	0	0	0	0	0	0	0	0	0	0	0	0	0	0	0	0	0	0	0	0	0	0	0	0	0	0	0	0	0	FS	0	0	0	0	0	0	0	0	0	0	0	0	0
YLL051C	FRE6					0	FS	0	0	0	0	0	0	0	0	0	0	0	0	0	0	0	0	0	0	0	0	0	0	0	0	0	Stop	0	0	0	0	0	0	0	0	0	0	0	0	0	0	0	0
YLL052C	AQY2					0	0	0	FS	0	FS	FS	FS	0	0	FS	0	0	FS	0	FS	0	FS	0	0	FS	0	Stop	FS	0	FS	FS	FS	FS	0	FS	FS	FS	FS	FS	FS	0	0	FS	FS	FS	FS	FS	FS
YLL053C	YLL053C					0	0	0	0	0	0	0	0	0	0	0	0	0	0	0	0	0	0	0	0	0	0	0	0	0	0	0	0	0	0	0	0	0	0	0	0	0	0	0	0	0	0	0	0
YLL055W	YCT1					0	0	0	0	0	0	0	0	0	0	0	0	FS	0	0	0	0	0	0	0	0	0	0	0	0	0	0	0	0	0	0	0	0	0	0	0	0	0	0	0	0	0	0	0
YLL057C	JLP1					0	0	0	0	0	0	0	0	0	0	Stop	0	0	0	0	0	0	0	0	0	0	0	0	0	0	0	0	0	0	0	0	0	0	0	0	0	0	0	0	0	0	0	Stop	0
YLL061W	MMP1					0	0	Stop	0	0	0	0	0	0	0	0	0	0	0	Stop	0	0	0	0	0	0	0	0	FS	0	0	Stop	0	0	0	Stop	Stop	0	0	FS	0	0	0	0	0	Stop	0	0	0
YLR001C	YLR001C					0	0	0	0	0	0	0	0	0	0	0	0	0	0	0	0	0	0	0	0	0	0	0	0	0	0	0	0	0	0	0	0	0	0	0	0	0	0	0	0	0	0	0	0
YLR011W	LOT6					0	0	0	0	0	0	0	0	0	0	0	0	0	0	0	0	0	0	0	0	0	0	0	0	0	0	0	0	FS	0	0	0	0	0	0	0	0	0	0	0	0	0	0	0
YLR013W	GAT3					0	0	0	0	0	0	0	0	0	0	0	0	0	0	0	0	0	0	0	0	0	0	0	0	0	0	0	0	0	Stop	0	0	0	0	0	0	0	0	0	0	0	0	0	0
YLR030W	YLR030W					FS	FS	FS	0	FS	FS	FS	FS	FS	FS	FS	FS	FS	FS	FS	FS	FS	FS	FS	FS	FS	FS	FS	FS	FS	FS	FS	FS	FS	FS	FS	FS	FS	FS	FS	FS	FS	FS	FS	FS	FS	FS	FS	FS
YLR036C	YLR036C					0	FS	0	0	FS	0	0	FS	0	0	FS	FS	0	FS	0	FS	0	0	0	0	0	0	FS	0	0	0	FS	FS	FS	0	FS	FS	FS	FS	FS	FS	0	0	FS	FS	FS	FS	FS	FS
YLR039C	RIC1					0	0	0	0	0	0	0	0	0	0	0	0	0	0	0	0	0	0	0	0	0	0	0	0	0	0	0	0	0	0	0	0	0	0	0	0	0	0	0	0	0	0	0	0
YLR049C	YLR049C					0	0	0	0	0	0	0	0	0	0	0	0	0	0	0	0	0	0	0	0	0	0	0	0	0	0	0	0	0	0	0	0	0	0	0	0	0	0	0	0	0	0	0	0
YLR053C	YLR053C					0	0	0	0	0	0	0	0	0	0	0	0	0	0	0	0	0	0	0	0	0	FS	0	0	0	0	0	0	0	0	0	0	0	0	0	0	0	0	0	0	0	0	0	0
YLR057W	YLR057W					0	0	0	0	0	0	0	0	0	0	0	0	0	0	0	0	0	0	0	0	0	0	0	0	0	0	0	0	0	0	0	0	0	0	0	0	0	0	0	0	0	0	FS	0
YLR059C	REX2					0	0	0	0	0	0	0	0	0	0	0	0	0	0	0	0	0	0	0	0	0	0	0	0	0	0	0	0	0	0	0	0	FS	0	0	0	0	0	0	0	0	0	0	0
YLR066W	SPC3	systematic mutation set	null	S288C	inviable	0	0	0	0	0	0	0	0	0	0	0	0	0	0	0	0	0	0	0	0	0	0	0	0	0	0	0	0	0	0	0	FS	0	0	0	0	0	0	0	0	0	0	0	0
YLR070C	XYL2					FS	0	0	0	0	0	0	0	0	0	0	0	0	0	0	0	0	0	0	0	0	0	0	0	0	0	0	0	0	0	0	0	0	0	0	0	0	0	0	0	0	0	0	0
YLR088W	GAA1	classical genetics	null	Other	inviable	0	0	0	0	0	0	0	0	FS	0	0	0	0	0	0	0	0	0	0	0	0	0	0	0	FS	0	0	0	0	0	0	0	0	0	0	0	0	0	0	0	0	0	0	0
YLR099C	ICT1					0	0	0	0	0	0	0	0	0	0	0	0	0	0	0	0	0	0	0	0	0	0	0	0	0	0	0	0	0	0	0	0	0	0	0	0	0	0	0	0	0	0	0	0
YLR102C	APC9					0	FS	0	0	0	0	0	0	0	0	0	0	0	0	0	0	0	0	0	0	0	0	0	FS	0	0	0	0	0	0	0	0	0	0	0	0	0	0	0	0	0	0	0	0
YLR119W	SRN2					Stop	FS	FS	FS	FS	FS	FS	FS	FS	FS	FS	FS	Stop	FS	FS	FS	FS	FS	FS	FS	FS	FS	FS	FS	FS	FS	FS	FS	FS	FS	FS	FS	FS	FS	FS	FS	FS	FS	FS	FS	FS	FS	FS	FS
YLR121C	YPS3					FS	0	0	0	0	0	0	0	0	0	0	0	FS	0	0	0	0	0	0	0	0	0	0	0	0	0	0	0	0	0	0	0	0	0	0	0	0	0	0	0	0	0	0	0
YLR127C	APC2	classical genetics	null	S288C	inviable	0	FS	0	0	0	FS	FS	0	0	0	0	0	0	0	0	0	FS	FS	0	0	0	0	0	0	0	0	0	0	FS	0	0	0	FS	0	FS	0	0	0	FS	0	0	0	0	0
YLR130C	ZRT2					0	0	0	0	0	0	0	0	0	0	0	FS	0	0	0	0	0	0	0	0	0	0	0	0	0	0	0	0	0	0	0	0	0	0	0	0	0	0	0	0	0	0	0	0
YLR136C	TIS11					Stop	0	0	0	0	0	0	0	0	0	0	0	0	0	0	0	0	0	0	0	0	0	0	0	0	0	0	0	0	0	0	0	0	0	0	0	0	0	0	0	0	0	0	0
YLR138W	NHA1					0	0	0	0	0	0	0	0	0	0	0	0	0	0	0	0	Stop	0	0	0	0	0	0	0	0	0	0	0	0	0	0	0	0	0	0	0	0	0	0	0	0	0	0	0
YLR142W	PUT1					0	0	0	0	0	0	0	FS	0	0	0	0	0	0	0	0	0	0	0	0	0	0	0	0	0	0	0	0	FS	0	0	0	0	0	0	0	0	0	0	0	0	0	0	0
YLR152C	YLR152C					0	FS	0	0	0	0	0	0	0	0	0	0	0	0	0	FS	0	0	0	0	0	0	0	0	0	0	0	FS	0	FS	FS	FS	0	0	0	0	0	0	0	FS	FS	0	0	0
YLR164W	YLR164W					FS	0	FS	0	FS	0	0	0	FS	0	0	FS	FS	0	0	FS	FS	0	0	FS	FS	FS	0	FS	0	FS	FS	FS	FS	0	0	0	0	0	0	0	FS	FS	0	FS	FS	0	0	0
YLR165C	PUS5					0	0	0	0	0	0	0	FS	0	0	0	0	0	0	0	0	0	0	0	0	0	0	0	0	0	0	0	0	0	0	0	0	0	0	0	0	0	0	0	0	0	0	0	0
YLR176C	RFX1					FS	0	FS	FS	FS	FS	FS	FS	FS	FS	FS	FS	FS	FS	0	FS	FS	0	FS	FS	FS	FS	FS	FS	FS	FS	FS	FS	FS	FS	0	0	FS	FS	0	FS	FS	FS	FS	FS	FS	FS	FS	FS
YLR187W	SKG3					0	Stop	0	0	0	0	0	0	0	0	0	0	0	0	0	0	0	0	0	0	0	0	0	0	0	0	0	0	0	0	0	0	0	0	0	0	0	0	0	Stop	0	0	0	0
YLR194C	YLR194C					0	0	0	0	0	0	0	0	0	0	0	0	0	0	0	0	0	0	0	0	0	0	0	0	0	0	0	0	0	0	0	0	0	0	0	0	0	0	0	0	0	0	0	0
YLR218C	COA4					0	0	0	0	0	0	0	0	0	0	0	0	0	0	0	FS	0	0	0	0	0	0	0	0	0	0	FS	0	0	0	FS	0	FS	0	0	0	0	0	0	0	0	0	0	0
YLR264C-A	YLR264C-A					0	0	0	0	FS	0	FS	0	0	0	FS	0	0	0	0	0	0	0	0	0	0	0	0	0	0	0	0	0	FS	0	0	0	FS	FS	0	0	0	0	0	0	0	0	FS	0
YLR266C	PDR8					0	0	0	0	0	0	0	0	0	0	0	0	0	0	0	0	0	0	0	0	0	0	0	0	0	0	0	0	0	0	0	0	0	0	0	0	0	0	0	0	0	0	0	0
YLR273C	PIG1					0	0	0	0	0	0	0	0	0	0	0	0	0	0	0	0	0	0	0	0	0	0	0	0	0	0	0	0	0	0	Stop	0	0	0	0	0	0	0	0	0	0	0	0	0
YLR285C-A	YLR285C-A					0	0	0	0	0	0	0	0	0	0	0	0	0	FS	0	0	0	0	0	0	0	0	0	0	0	0	0	0	0	0	0	0	0	0	0	0	0	0	0	0	0	FS	0	0
YLR286C	CTS1					0	0	0	0	0	0	0	0	0	0	0	0	0	0	0	0	0	0	0	0	0	0	0	0	0	0	0	0	0	0	0	0	0	0	0	0	0	0	0	0	0	0	0	0
YLR300W	EXG1					0	0	0	0	0	0	0	0	0	0	0	0	0	0	0	0	0	0	0	0	0	0	0	0	0	0	0	0	0	0	0	0	0	0	0	0	0	0	0	0	0	0	0	FS
YLR303W	MET17					0	0	0	0	0	0	0	0	0	0	0	0	0	0	0	0	0	0	0	0	0	0	0	0	0	0	0	0	0	0	0	0	0	0	0	0	0	0	0	0	0	0	0	0
YLR312C	YLR312C					0	0	0	0	0	0	0	0	0	0	0	0	0	0	0	0	0	0	0	0	0	0	0	0	0	0	0	0	0	0	0	0	0	Stop	0	0	0	0	0	0	0	0	0	0
YLR313C	SPH1					FS	FS	FS	FS	FS	FS	FS	0	FS	FS	FS	FS	FS	FS	0	FS	FS	FS	FS	FS	FS	FS	FS	FS	FS	FS	FS	FS	FS	FS	FS	FS	FS	FS	FS	FS	FS	FS	FS	FS	FS	FS	FS	FS
YLR318W	EST2					FS	FS	FS	0	FS	FS	FS	0	FS	FS	0	FS	FS	FS	0	FS	FS	FS	FS	FS	FS	FS	0	FS	FS	FS	FS	FS	FS	FS	FS	0	FS	FS	FS	0	FS	FS	FS	FS	FS	FS	0	0
YLR342W-A	YLR342W-A					FS	FS	FS	0	0	0	FS	0	FS	FS	FS	FS	FS	FS	0	0	FS	FS	FS	FS	FS	FS	FS	0	FS	0	0	FS	FS	0	0	0	FS	0	0	FS	FS	FS	FS	0	FS	FS	FS	FS
YLR345W	YLR345W					0	0	0	0	0	0	0	0	0	0	Stop	0	0	0	0	0	0	0	0	0	0	0	0	0	0	0	0	0	0	0	0	0	0	0	0	0	0	0	0	0	0	0	Stop	0
YLR346C	YLR346C					0	0	0	0	0	0	0	0	0	0	0	0	0	0	0	0	0	0	0	0	0	0	0	0	0	0	0	Stop	0	0	0	0	0	0	0	0	0	0	0	0	0	0	0	0
YLR369W	SSQ1					0	0	FS	0	0	0	0	0	0	0	0	FS	FS	0	0	0	0	0	0	FS	0	FS	0	0	0	0	0	0	0	0	0	0	0	0	0	0	0	0	0	0	0	0	0	0
YLR406C-A	YLR406C-A					FS	FS	FS	Stop	Stop	Stop	Stop	Stop	FS	FS	Stop	FS	FS	Stop	Stop	0	FS	Stop	FS	FS	Stop	FS	0	FS	FS	FS	Stop	Stop	Stop	Stop	Stop	Stop	FS	Stop	Stop	Stop	FS	FS	Stop	Stop	FS	Stop	Stop	Stop
YLR408C	BLS1					0	Stop	0	Stop	Stop	Stop	Stop	Stop	0	0	Stop	0	0	Stop	Stop	0	0	Stop	0	0	Stop	0	Stop	0	0	0	Stop	Stop	Stop	Stop	Stop	Stop	Stop	Stop	Stop	Stop	0	0	Stop	Stop	0	Stop	Stop	Stop
YLR414C	PUN1					0	0	0	0	0	0	0	0	0	0	0	0	FS	0	0	0	0	0	0	0	0	0	0	0	0	0	0	0	0	0	0	0	0	0	0	0	0	0	0	0	0	0	0	0
YLR415C	YLR415C					0	0	0	FS	FS	FS	FS	FS	0	0	FS	0	0	0	0	0	0	FS	0	0	0	0	0	0	0	0	FS	0	0	0	0	0	0	0	FS	0	0	0	FS	0	0	0	FS	0
YLR424W	SPP382	classical genetics	null	Other	inviable	0	0	0	0	0	0	0	0	0	0	0	0	0	0	0	0	0	0	0	0	0	0	0	0	0	0	0	0	0	0	0	0	0	0	0	0	0	0	0	0	0	0	0	0
YLR446W	YLR446W					0	0	0	0	0	0	0	0	0	0	0	0	0	0	0	0	0	0	0	0	0	0	0	FS	0	0	0	0	0	FS	0	0	0	0	0	0	0	0	0	0	0	0	0	0
YLR450W	HMG2					FS	0	0	0	0	0	0	0	0	0	0	Stop	FS	0	0	0	0	0	0	0	0	0	0	0	0	0	0	Stop	0	0	0	0	0	0	0	0	0	0	0	0	0	0	0	0
YML003W	YML003W					FS	FS	FS	FS	FS	FS	FS	FS	FS	FS	FS	FS	FS	FS	FS	FS	FS	FS	FS	FS	FS	FS	FS	FS	FS	FS	FS	FS	FS	FS	FS	FS	FS	FS	FS	FS	FS	FS	FS	FS	FS	FS	FS	FS
YML006C	GIS4					0	0	0	0	0	0	0	0	0	0	0	0	0	0	0	0	0	0	0	0	0	0	0	0	0	0	0	0	0	0	0	0	0	0	0	0	0	0	0	0	0	0	0	0
YML018C	YML018C					0	0	0	0	0	0	FS	0	0	0	0	0	0	0	0	0	0	0	0	0	0	0	0	0	0	0	0	0	0	0	0	0	0	0	0	0	0	0	0	0	0	0	0	0
YML052W	SUR7					0	0	0	0	0	0	0	0	0	0	0	0	0	0	0	Stop	0	0	0	0	0	0	0	0	0	0	0	0	0	0	0	0	0	0	0	0	0	0	0	0	0	0	0	0
YML054C-A	YML054C-A					0	0	0	0	0	0	0	0	0	0	0	0	0	0	0	0	0	0	0	0	0	0	0	0	0	0	0	0	0	0	0	0	0	FS	0	0	0	0	0	0	0	0	0	0
YML074C	FPR3					0	0	0	0	0	0	0	0	0	0	0	0	0	0	0	0	FS	0	0	0	0	0	0	0	0	0	0	0	0	0	0	0	0	0	0	0	0	0	0	0	0	0	0	0
YML088W	UFO1					0	0	0	0	0	0	0	0	0	0	0	0	0	0	0	Stop	0	0	0	0	0	0	0	0	0	0	0	0	0	0	0	0	0	0	0	0	0	0	0	0	0	0	0	0
YML100W-A	YML100W-A					FS	FS	FS	FS	FS	FS	FS	FS	FS	FS	FS	FS	FS	FS	FS	FS	FS	FS	FS	FS	FS	FS	FS	FS	FS	FS	FS	FS	Stop	FS	FS	FS	FS	FS	FS	FS	FS	FS	FS	FS	FS	FS	FS	FS
YML104C	MDM1					0	0	FS	0	0	0	0	0	0	0	0	0	0	0	0	0	0	0	0	0	0	0	0	0	0	0	0	0	0	0	0	0	0	0	0	0	0	0	0	0	0	0	0	0
YML118W	NGL3					0	0	0	FS	0	0	0	FS	FS	FS	0	FS	0	0	0	0	0	FS	FS	FS	FS	FS	0	0	FS	FS	0	0	0	0	FS	0	FS	FS	0	FS	0	0	0	0	FS	0	0	FS
YMR001C-A	YMR001C-A					0	0	0	0	0	0	0	0	0	0	0	0	0	0	0	0	0	0	0	0	0	0	0	0	0	0	0	0	0	0	0	0	0	0	0	0	0	0	0	0	0	0	0	0
YMR019W	STB4					FS	FS	FS	FS	FS	FS	FS	FS	FS	FS	FS	FS	FS	FS	FS	FS	FS	0	FS	FS	FS	FS	FS	FS	0	FS	FS	FS	0	FS	FS	FS	FS	FS	FS	FS	FS	FS	FS	FS	FS	FS	FS	FS
YMR030W-A	YMR030W-A					FS	FS	0	FS	FS	FS	FS	FS	0	0	FS	0	FS	FS	FS	0	FS	0	0	0	FS	0	0	0	0	0	0	FS	0	0	FS	FS	0	FS	FS	FS	0	0	FS	FS	0	FS	FS	FS
YMR030W	RSF1					0	0	0	0	0	0	0	0	0	0	0	0	0	0	0	0	0	0	0	0	0	0	0	0	0	0	0	0	0	0	0	0	0	0	0	0	0	0	0	FS	0	0	0	0
YMR084W	YMR084W					FS	FS	FS	FS	FS	FS	FS	FS	FS	FS	FS	FS	FS	FS	FS	FS	FS	FS	FS	FS	FS	FS	FS	FS	FS	FS	FS	FS	FS	FS	0	0	FS	FS	FS	FS	FS	FS	FS	FS	FS	FS	FS	FS
YMR095C	SNO1					0	0	0	0	0	0	0	0	0	0	0	0	0	0	0	0	0	0	0	0	0	0	0	0	0	0	0	0	0	0	FS	0	0	0	0	0	0	0	0	0	0	0	0	0
YMR096W	SNZ1					0	0	0	0	0	0	0	0	0	0	0	0	0	0	0	0	0	0	0	0	0	0	0	0	0	0	0	0	0	0	0	0	0	0	0	0	0	0	0	0	0	0	0	0
YMR097C	MTG1					0	0	0	0	0	0	0	0	0	0	FS	0	0	0	0	0	0	0	0	0	0	0	0	0	0	0	0	0	0	0	0	0	0	0	0	0	0	0	0	0	0	0	FS	0
YMR105W-A	YMR105W-A					0	FS	0	0	0	0	0	0	0	0	0	0	0	0	0	0	0	0	0	0	0	0	0	0	0	FS	0	FS	0	0	0	0	0	FS	FS	0	0	0	0	FS	FS	0	0	0
YMR110C	HFD1					0	0	0	0	0	0	0	0	0	0	0	0	0	0	0	0	0	0	0	0	0	0	0	0	0	0	0	0	0	0	0	0	0	0	0	0	0	0	0	0	0	0	0	0
YMR128W	ECM16	systematic mutation set	null	S288C	inviable	0	0	0	0	0	0	0	0	0	0	0	0	0	0	0	0	0	0	0	0	0	0	0	0	0	0	0	0	0	0	0	0	0	0	0	0	0	0	0	0	0	0	0	0
YMR136W	GAT2					FS	0	0	0	FS	0	0	0	0	0	0	0	FS	0	0	0	0	0	0	0	0	0	0	FS	0	0	0	0	0	0	0	0	0	0	0	0	0	0	0	0	0	0	0	0
YMR140W	SIP5					0	FS	0	0	0	FS	0	0	0	0	0	0	0	0	0	0	0	0	0	0	0	0	0	0	0	0	0	0	0	0	0	0	0	0	0	0	0	0	0	0	0	0	0	0
YMR152W	YIM1					Stop	0	0	0	0	0	0	0	0	0	0	0	Stop	0	0	0	0	0	0	0	0	0	0	0	0	0	0	0	0	0	0	0	0	0	0	0	0	0	0	0	0	0	0	0
YMR159C	ATG16					0	0	0	0	0	0	0	0	0	0	0	0	0	0	0	0	0	0	0	0	0	0	0	0	0	0	0	0	0	0	0	0	0	0	0	0	0	0	0	FS	0	0	0	0
YMR160W	YMR160W					0	0	0	0	0	0	0	0	0	0	0	0	0	0	0	0	0	0	0	0	0	0	0	0	0	0	0	0	0	0	0	0	0	0	0	0	0	0	0	0	0	0	0	0
YMR175W-A	YMR175W-A					FS	FS	0	0	FS	0	FS	FS	0	FS	FS	FS	FS	FS	0	FS	0	0	0	FS	FS	0	Stop	FS	0	FS	0	FS	0	0	FS	FS	FS	FS	FS	FS	0	0	FS	FS	FS	FS	FS	FS
YMR176W	ECM5					0	0	0	0	0	0	0	0	0	0	0	0	0	0	0	0	0	0	0	0	0	0	0	0	0	0	0	0	0	0	0	FS	0	0	0	0	0	0	0	0	0	0	0	0
YMR180C	CTL1					0	0	0	Stop	0	0	0	0	0	Stop	0	0	Stop	0	0	0	Stop	Stop	0	0	0	0	0	0	0	Stop	0	0	0	0	0	0	0	0	0	0	0	0	0	0	0	0	0	0
YMR192W	GYL1					0	0	0	0	Stop	0	Stop	0	0	0	0	0	0	0	0	0	0	0	0	0	0	0	0	0	0	0	0	0	0	0	0	0	0	0	0	0	0	0	0	0	0	0	0	0
YMR199W	CLN1					0	0	0	0	0	0	0	0	0	0	0	0	0	0	0	0	0	0	0	0	0	0	0	0	0	0	0	0	0	0	0	0	0	0	0	0	0	0	0	0	0	0	0	0
YMR204C	INP1					0	0	0	0	0	0	0	0	0	0	0	0	0	0	0	0	0	0	0	Stop	0	0	0	0	0	0	0	0	0	0	0	0	0	0	0	0	0	0	0	0	0	0	0	0
YMR209C	YMR209C					0	0	0	0	0	0	0	0	0	0	0	0	0	0	0	0	0	0	0	0	0	0	0	0	0	0	0	0	0	0	0	0	0	0	0	0	0	0	0	0	0	0	0	0
YMR215W	GAS3					FS	0	0	0	0	0	0	0	0	0	0	0	FS	0	0	0	0	0	0	0	0	0	0	0	0	0	0	0	0	0	0	0	0	0	0	0	0	0	0	0	0	0	0	0
YMR216C	SKY1					0	0	0	0	Stop	0	0	0	0	0	0	0	0	0	0	0	0	0	0	0	0	0	0	0	0	0	0	0	0	0	0	0	0	0	0	0	0	0	0	0	0	0	0	0
YMR230W-A	YMR230W-A					0	0	0	0	0	0	0	0	0	0	0	0	0	0	0	0	0	0	0	0	0	0	0	0	0	0	0	0	Stop	0	0	0	0	0	0	0	0	0	0	0	0	0	0	0
YMR233W	TRI1					0	0	0	0	0	0	0	0	0	0	0	0	0	FS	0	0	0	FS	0	0	0	0	0	0	0	0	0	0	0	0	FS	FS	0	0	FS	FS	0	0	0	FS	FS	FS	0	FS
YMR251W	GTO3					0	0	0	0	0	0	0	0	0	0	0	0	0	0	0	0	0	0	0	0	0	0	0	0	0	0	0	0	0	0	0	0	0	0	0	0	0	0	0	0	0	0	0	0
YMR265C	YMR265C					0	0	0	0	0	0	0	0	0	0	0	0	0	0	0	0	0	0	0	0	0	0	0	0	0	0	0	0	0	0	0	0	0	0	0	0	0	0	0	0	0	0	0	0
YMR271C	URA10					0	0	0	0	0	0	0	0	0	0	0	0	0	0	0	0	0	0	0	0	0	0	0	0	0	0	0	0	0	0	0	0	0	0	0	0	0	0	0	0	0	0	0	0
YMR279C	YMR279C					0	0	0	0	0	0	0	0	0	0	0	0	0	0	0	0	0	0	0	0	0	0	0	0	0	0	0	0	0	0	0	0	0	0	0	0	0	0	0	0	0	0	0	0
YMR316W	DIA1					0	0	0	0	0	0	0	0	0	0	0	0	0	0	0	0	0	0	0	0	0	0	0	0	0	0	0	0	0	0	0	0	0	0	0	0	0	0	0	0	0	0	0	0
YNL020C	ARK1					0	0	0	0	0	0	0	0	0	0	0	0	0	0	0	0	0	0	0	0	0	0	0	0	0	0	0	0	0	0	0	0	0	0	0	0	0	0	0	0	0	0	0	0
YNL040W	YNL040W					0	0	0	0	0	0	0	0	0	0	0	0	0	0	0	0	0	0	0	0	0	0	0	0	0	0	0	0	0	0	0	0	0	0	0	0	0	0	0	0	0	0	0	0
YNL045W	LAP2					0	0	0	0	0	0	0	0	0	0	0	0	0	0	0	0	0	0	0	0	0	0	0	0	0	0	0	FS	0	0	0	0	0	0	0	0	0	0	0	0	0	0	0	0
YNL067W-B	YNL067W-B					0	FS	0	FS	FS	FS	FS	FS	0	0	FS	0	0	FS	0	0	0	FS	0	0	0	0	FS	0	0	0	FS	FS	FS	0	FS	FS	FS	FS	0	FS	0	0	FS	0	0	FS	FS	FS
YNL074C	MLF3					0	0	Stop	0	0	0	0	0	0	0	0	0	0	0	0	0	0	0	0	0	0	0	0	0	0	0	0	0	0	0	0	0	0	0	0	0	0	0	0	0	0	0	0	0
YNL083W	SAL1					FS	FS	FS	FS	FS	FS	FS	FS	FS	FS	FS	FS	FS	FS	FS	FS	FS	FS	FS	FS	FS	FS	FS	FS	FS	FS	FS	FS	FS	FS	FS	FS	FS	FS	FS	FS	FS	FS	FS	FS	FS	FS	FS	FS
YNL087W	TCB2					0	0	0	0	FS	FS	FS	FS	0	0	0	0	0	0	FS	0	0	0	0	0	0	0	0	0	0	0	0	0	0	0	0	0	0	0	0	0	0	0	0	0	0	0	0	0
YNL092W	YNL092W					0	0	0	0	0	0	0	0	0	0	0	0	0	0	0	0	0	0	0	0	0	0	0	0	0	0	0	0	0	0	0	0	0	0	0	0	0	0	0	0	0	0	0	0
YNL095C	YNL095C					0	0	0	0	0	0	0	0	0	0	0	0	0	0	0	0	0	0	0	FS	0	0	0	0	0	0	0	0	0	0	0	0	0	0	0	0	0	0	0	0	0	0	0	0
YNL097C-B	YNL097C-B					0	0	0	FS	0	FS	FS	0	0	0	0	0	0	0	0	0	0	0	0	0	0	0	0	0	0	0	0	0	0	0	Stop	Stop	FS	0	Stop	0	0	0	0	0	0	0	0	0
YNL100W	AIM37					0	0	0	0	0	0	0	0	0	0	0	0	0	0	0	0	0	0	0	0	0	0	0	0	0	0	0	0	0	0	0	0	0	0	0	0	0	0	0	0	0	0	0	0
YNL103W	MET4	systematic mutation set	null	S288C	inviable	0	0	0	0	0	0	0	0	0	0	0	FS	0	0	0	0	0	0	0	0	0	0	0	0	0	0	0	0	0	0	0	0	0	0	0	0	0	0	0	0	0	0	0	0
YNL116W	DMA2					0	0	0	0	0	0	0	Stop	0	0	0	0	0	0	Stop	Stop	0	Stop	0	0	0	0	0	0	0	0	0	0	0	0	0	0	0	0	Stop	0	0	0	0	0	0	0	0	0
YNL118C	DCP2	systematic mutation set	null	S288C	inviable	0	Stop	0	0	0	0	0	0	0	0	0	0	0	0	0	0	0	0	0	0	0	0	0	0	0	0	0	0	0	0	0	0	0	0	0	0	0	0	0	0	0	0	0	0
YNL123W	NMA111					0	0	0	0	0	0	0	0	0	0	0	0	0	0	0	0	0	0	0	0	0	0	0	0	0	0	0	0	0	0	0	0	Stop	0	0	0	0	0	0	0	0	0	0	0
YNL125C	ESBP6					0	0	0	0	0	0	0	0	0	0	0	FS	0	0	0	0	0	0	0	0	0	0	0	0	0	0	FS	0	FS	0	0	0	0	0	0	0	0	0	0	0	0	0	0	0
YNL146C-A	YNL146C-A					0	0	0	0	0	0	0	0	0	0	0	0	0	FS	0	0	0	0	0	0	0	0	0	0	0	FS	FS	FS	0	0	FS	FS	0	0	FS	0	0	0	FS	0	0	FS	0	0
YNL148C	ALF1					0	0	0	0	0	0	0	0	0	0	0	0	0	0	0	0	0	0	0	0	0	0	0	0	0	0	0	0	0	0	0	0	0	0	0	0	0	0	0	0	0	0	0	0
YNL157W	IGO1					0	0	0	0	0	0	0	0	0	0	0	0	0	0	0	0	0	0	0	0	0	0	0	0	0	0	0	0	0	0	0	0	0	0	0	0	0	0	FS	0	0	0	0	0
YNL159C	ASI2					0	0	0	0	0	0	0	0	0	0	0	0	0	0	0	0	0	0	0	0	0	0	0	0	0	0	0	0	0	0	0	0	0	0	0	0	0	0	0	0	0	0	0	0
YNL175C	NOP13					0	0	0	0	0	0	0	0	0	0	0	0	0	0	0	0	0	0	0	0	0	0	0	0	0	0	0	0	0	0	0	0	0	0	0	0	0	0	0	0	0	0	0	0
YNL193W	YNL193W					0	0	0	0	0	0	0	0	0	0	0	0	0	0	0	0	0	0	0	0	0	0	0	0	0	0	0	FS	0	0	0	0	0	0	0	0	0	0	0	0	0	0	0	0
YNL194C	YNL194C					FS	0	0	0	0	0	0	0	0	0	0	0	FS	0	0	0	0	0	0	0	0	0	0	0	0	0	0	0	0	0	Stop	Stop	0	0	0	0	0	0	0	0	0	0	0	0
YNL195C	YNL195C					0	0	0	0	0	0	0	0	0	0	0	0	0	0	0	0	0	0	0	0	0	0	0	0	0	0	0	0	0	0	0	0	0	0	FS	0	0	0	0	0	0	0	0	0
YNL196C	SLZ1					0	0	0	0	0	0	0	0	0	0	0	0	0	0	0	0	0	0	0	0	0	0	0	FS	0	0	0	0	0	0	0	0	0	0	0	0	0	0	0	0	0	0	0	0
YNL239W	LAP3					0	0	0	FS	FS	0	0	0	0	0	0	0	0	0	0	0	0	0	0	0	0	0	0	FS	0	FS	FS	0	0	0	0	0	0	0	FS	0	0	0	0	0	0	0	0	0
YNL249C	MPA43					0	0	0	FS	FS	FS	FS	FS	0	0	FS	FS	0	FS	0	0	0	0	0	0	FS	0	FS	FS	0	FS	FS	0	FS	0	FS	FS	FS	FS	FS	FS	0	0	FS	FS	FS	FS	FS	FS
YNL260C	YNL260C	classical genetics	null	S288C	inviable	FS	0	0	Stop	Stop	Stop	Stop	Stop	FS	0	Stop	Stop	FS	Stop	0	FS	FS	FS	0	0	Stop	FS	Stop	0	FS	0	FS	Stop	Stop	FS	Stop	Stop	Stop	Stop	Stop	Stop	FS	0	Stop	Stop	Stop	Stop	Stop	Stop
YNL269W	BSC4					0	0	0	FS	0	0	0	FS	0	0	FS	0	0	FS	0	FS	FS	0	0	0	FS	0	FS	FS	0	FS	0	0	FS	0	FS	FS	0	Stop	FS	FS	0	0	FS	FS	FS	FS	FS	FS
YNL275W	BOR1					0	0	0	0	0	0	0	0	0	0	0	0	0	0	FS	0	0	0	0	0	0	0	0	0	0	0	0	0	0	0	0	0	0	0	0	0	0	0	0	0	0	0	0	0
YNL277W-A	YNL277W-A					0	0	0	FS	0	0	0	FS	0	0	0	0	0	FS	FS	FS	FS	FS	0	0	FS	0	FS	FS	0	0	0	0	0	0	0	0	0	FS	FS	FS	0	0	FS	FS	0	FS	0	FS
YNL279W	PRM1					0	0	0	0	0	0	0	0	0	0	0	0	0	0	0	0	0	0	0	0	0	0	0	0	0	0	0	0	0	0	0	0	0	0	0	0	0	0	0	0	0	0	0	0
YNL282W	POP3	classical genetics	null	Other	inviable	0	0	0	0	0	0	0	0	0	0	0	0	0	0	0	0	0	0	0	0	0	0	0	0	0	0	0	0	0	0	0	0	0	0	0	0	0	0	0	0	0	0	0	0
YNL283C	WSC2					0	0	0	0	0	0	0	0	0	0	0	0	0	0	0	0	0	0	0	0	0	0	0	0	0	0	0	0	0	0	0	0	0	0	0	0	0	0	0	0	0	0	0	0
YNR017W	TIM23	classical genetics	null	Other	inviable	0	0	0	0	0	0	0	0	0	0	0	0	0	0	0	0	0	0	0	0	0	0	0	0	0	0	0	0	0	0	0	0	0	0	0	0	0	0	0	0	0	0	0	0
YNR020C	ATP23					FS	FS	FS	FS	FS	FS	FS	FS	FS	FS	FS	FS	FS	FS	FS	FS	FS	FS	FS	FS	FS	FS	0	FS	FS	FS	FS	FS	FS	FS	FS	FS	0	0	0	FS	FS	FS	FS	FS	FS	FS	FS	0
YNR022C	MRPL50					0	0	0	0	0	0	0	0	0	0	0	0	0	0	0	0	0	0	0	0	0	0	0	0	0	0	0	0	0	0	0	0	0	0	0	0	FS	0	0	0	0	0	0	0
YNR024W	MPP6					0	0	0	0	0	0	0	0	0	0	0	0	0	0	0	0	0	0	0	0	0	0	0	0	0	0	0	0	0	0	0	0	0	0	0	0	0	0	0	0	0	0	0	0
YNR056C	BIO5					0	0	0	0	FS	0	0	FS	0	0	FS	0	0	FS	0	FS	0	0	0	0	FS	0	FS	0	0	0	0	0	FS	0	FS	FS	FS	FS	FS	FS	0	0	FS	FS	0	FS	FS	FS
YNR057C	BIO4					0	0	0	0	0	0	0	0	0	0	0	0	0	0	0	Stop	0	0	0	0	0	0	0	0	0	0	0	0	Stop	0	0	0	0	0	0	0	0	0	0	0	0	0	0	0
YNR059W	MNT4					Stop	0	0	0	0	0	0	0	0	0	0	0	0	0	0	0	0	0	0	0	0	0	0	0	0	0	0	0	0	0	0	0	0	0	0	0	0	0	0	0	0	0	0	0
YNR060W	FRE4					0	0	0	0	0	0	0	0	0	0	0	0	0	0	FS	0	0	0	0	0	0	0	0	0	0	0	0	0	0	0	0	0	0	0	0	0	0	0	0	0	0	0	0	0
YNR061C	YNR061C					0	0	0	0	0	0	0	0	0	0	0	0	0	0	0	0	0	0	0	0	0	0	0	0	0	0	0	0	0	FS	0	0	0	0	0	0	FS	FS	0	0	0	0	0	0
YNR062C	YNR062C					0	0	0	0	0	0	0	0	0	0	0	0	0	0	0	0	0	0	0	0	0	0	0	0	0	0	0	0	0	0	0	0	0	0	0	0	0	0	0	0	0	0	0	0
YNR064C	YNR064C					Stop	0	0	0	0	0	0	0	0	0	0	0	0	0	0	0	0	0	0	0	0	0	0	0	0	0	0	0	0	0	0	0	0	0	0	0	0	0	0	0	0	0	0	0
YOL004W	SIN3					0	0	FS	0	0	0	0	0	0	0	0	0	0	0	0	0	0	0	0	FS	0	0	0	0	0	FS	0	0	0	0	0	0	0	0	0	0	0	0	0	0	0	0	0	0
YOL012C	HTZ1					0	0	0	0	0	0	0	0	0	0	0	0	FS	0	0	0	0	0	0	0	0	0	0	0	0	0	0	0	0	0	0	0	0	0	0	0	0	0	0	0	0	0	0	0
YOL014W	YOL014W					FS	0	FS	FS	FS	FS	FS	FS	FS	FS	Stop	FS	FS	FS	FS	FS	FS	FS	FS	FS	FS	FS	FS	FS	FS	0	FS	FS	FS	FS	FS	FS	FS	FS	FS	FS	FS	FS	FS	FS	FS	FS	Stop	FS
YOL019W-A	YOL019W-A					FS	0	0	0	0	0	0	0	0	0	0	0	FS	0	0	0	0	0	0	0	0	0	0	0	0	0	0	0	0	0	Stop	Stop	0	0	0	0	0	0	0	0	0	0	0	0
YOL019W	YOL019W					0	0	0	0	0	0	0	0	0	0	0	0	0	0	FS	0	0	0	0	0	0	0	0	0	0	0	0	0	0	0	0	0	0	0	0	0	0	0	0	0	0	0	0	0
YOL020W	TAT2					0	0	0	0	0	0	0	0	0	0	0	0	0	0	0	0	0	0	0	0	0	0	0	0	0	Stop	0	0	0	0	0	0	0	0	0	0	0	0	0	0	0	0	0	0
YOL024W	YOL024W					0	0	0	0	0	0	0	0	0	0	0	0	0	0	0	0	0	0	Stop	0	Stop	0	0	0	0	0	0	0	0	0	0	0	0	0	0	0	0	0	0	0	0	0	0	0
YOL028C	YAP7					0	FS	0	FS	FS	0	FS	FS	0	0	FS	0	0	FS	FS	0	FS	FS	FS	0	FS	0	FS	FS	0	FS	0	FS	FS	0	FS	FS	FS	FS	FS	FS	0	0	FS	FS	0	FS	FS	FS
YOL029C	YOL029C					0	0	0	0	0	0	0	0	0	0	0	0	0	0	0	0	0	0	0	0	0	0	0	0	0	0	0	0	0	0	0	Stop	0	0	Stop	0	0	0	0	0	0	0	0	FS
YOL038C-A	YOL038C-A					0	0	0	0	0	0	0	0	0	0	0	0	0	0	Stop	0	0	0	0	0	0	0	0	Stop	0	0	0	0	Stop	0	Stop	Stop	FS	Stop	0	Stop	0	0	0	Stop	0	0	0	Stop
YOL047C	YOL047C					0	0	0	0	0	0	0	0	0	0	0	0	0	0	0	0	0	0	0	0	0	0	0	0	0	0	0	0	0	0	0	FS	0	0	0	0	0	0	0	0	0	0	0	0
YOL063C	CRT10					Stop	Stop	Stop	Stop	Stop	Stop	Stop	Stop	Stop	Stop	Stop	Stop	Stop	Stop	Stop	Stop	Stop	Stop	Stop	Stop	Stop	Stop	Stop	Stop	Stop	Stop	Stop	Stop	Stop	Stop	Stop	Stop	0	Stop	Stop	Stop	Stop	Stop	Stop	Stop	Stop	Stop	Stop	Stop
YOL068C	HST1					0	0	0	0	FS	0	0	0	0	0	0	0	0	0	0	0	0	0	0	0	0	0	0	0	0	0	0	0	0	0	0	0	0	0	0	0	0	0	0	0	0	0	0	0
YOL075C	YOL075C					0	0	0	0	0	0	0	0	0	0	0	0	0	0	0	0	0	0	0	0	0	0	0	0	0	0	0	0	Stop	0	0	0	0	0	0	0	0	0	0	0	0	0	0	0
YOL081W	IRA2					0	0	0	0	0	0	0	FS	0	0	0	0	0	0	0	0	0	0	0	0	0	0	0	0	Stop	0	0	0	0	0	0	0	0	0	0	0	0	0	0	0	0	0	0	0
YOL083W	ATG34					0	FS	0	0	0	0	0	0	0	0	0	0	0	0	0	0	0	0	0	0	0	0	FS	0	0	0	0	0	0	0	0	0	0	0	0	0	0	0	0	0	0	0	0	0
YOL097W-A	YOL097W-A					FS	FS	FS	0	0	FS	FS	0	FS	FS	0	FS	FS	0	FS	0	FS	0	FS	FS	0	FS	0	FS	FS	0	0	FS	0	FS	0	0	0	0	0	0	FS	FS	0	0	FS	0	0	0
YOL112W	MSB4					0	0	0	0	0	0	0	0	0	0	0	0	0	0	0	0	0	0	0	0	0	0	0	0	0	0	0	0	0	0	0	0	0	0	0	0	0	0	0	0	0	0	0	0
YOL114C	YOL114C					0	0	0	0	0	0	0	0	0	0	0	0	0	0	0	0	0	0	0	0	0	0	0	0	0	0	0	0	0	0	0	0	0	0	0	0	0	0	0	0	0	0	0	0
YOL117W	RRI2					0	0	0	0	0	0	0	0	0	0	0	0	0	0	0	0	0	0	0	0	0	0	0	0	0	0	0	0	0	0	0	0	0	0	0	0	0	0	0	0	0	0	0	0
YOL145C	CTR9					0	0	0	0	0	0	0	0	0	0	0	0	0	0	0	0	0	0	0	0	0	0	0	0	0	0	0	0	0	0	0	0	0	0	0	0	0	0	0	0	0	0	0	0
YOL151W	GRE2					0	0	0	0	0	0	0	0	0	0	0	0	0	0	0	0	0	0	0	0	0	0	0	0	0	0	0	0	0	0	0	0	0	0	FS	0	0	0	0	0	0	0	0	0
YOL152W	FRE7					0	0	0	0	0	0	0	0	0	0	0	0	0	0	0	0	FS	0	0	0	0	0	0	0	0	0	0	0	0	FS	0	0	0	0	0	0	0	0	0	0	0	0	0	0
YOL159C-A	YOL159C-A					0	0	0	0	FS	0	0	0	0	0	0	FS	0	0	0	0	0	0	FS	FS	FS	FS	0	0	0	0	FS	0	0	0	0	0	0	0	0	0	0	0	0	0	FS	0	0	0
YOR007C	SGT2					0	0	0	0	0	0	0	0	0	0	0	0	Stop	0	0	0	0	0	0	0	0	0	0	0	0	0	0	0	0	0	0	0	0	0	0	0	0	0	0	0	0	0	0	0
YOR008C-A	YOR008C-A					0	0	0	0	0	0	0	0	0	0	0	0	0	0	0	0	0	0	0	0	0	0	0	0	0	0	0	0	0	0	0	0	0	0	0	0	0	0	0	0	0	0	0	0
YOR011W-A	YOR011W-A					0	0	0	0	0	0	Stop	0	0	0	0	0	0	0	0	0	Stop	0	0	0	0	0	0	0	0	0	0	0	0	0	0	0	0	0	0	0	0	0	0	FS	0	0	0	0
YOR012W	YOR012W					FS	FS	FS	FS	FS	FS	FS	FS	FS	FS	FS	FS	FS	FS	FS	FS	FS	FS	FS	FS	FS	FS	FS	FS	FS	FS	0	FS	FS	FS	FS	FS	FS	FS	FS	FS	FS	FS	FS	FS	FS	FS	FS	FS
YOR028C	CIN5					0	0	0	0	0	0	0	0	0	0	Stop	0	0	0	0	0	0	0	0	0	0	0	0	0	0	0	0	0	0	0	0	0	0	0	0	0	FS	0	0	0	0	0	Stop	0
YOR030W	DFG16					0	0	0	0	0	0	0	0	0	Stop	0	0	0	0	0	0	0	0	0	0	0	0	0	0	0	0	0	0	0	0	0	0	0	0	0	0	0	0	0	0	0	0	0	0
YOR032C	HMS1					Stop	0	0	0	0	0	0	Stop	0	0	0	0	0	0	0	0	0	0	0	0	0	0	0	0	0	0	0	Stop	0	0	0	0	0	0	0	0	0	0	0	0	0	0	0	0
YOR032W-A	YOR032W-A					0	Stop	0	0	0	0	0	0	0	0	0	0	0	0	0	0	0	0	0	0	0	0	0	0	0	0	0	0	0	0	0	0	0	0	0	0	0	0	0	0	0	0	0	0
YOR034C-A	YOR034C-A					FS	0	FS	FS	FS	FS	FS	0	FS	FS	FS	FS	FS	FS	FS	FS	FS	FS	FS	FS	FS	FS	FS	FS	FS	FS	FS	FS	FS	FS	FS	FS	FS	FS	FS	FS	FS	FS	FS	FS	FS	FS	FS	FS
YOR035C	SHE4					0	0	0	0	0	0	0	0	0	0	0	0	0	0	0	0	0	0	0	0	0	0	0	0	0	0	FS	0	0	0	0	0	0	0	0	0	0	0	0	0	0	0	0	0
YOR043W	WHI2					0	0	0	0	0	0	0	0	Stop	FS	0	0	0	0	0	0	0	0	0	0	0	0	FS	Stop	0	0	0	0	0	0	0	0	0	0	0	0	0	0	0	0	0	0	0	0
YOR051C	ETT1					0	0	0	0	0	0	0	0	0	0	0	0	0	0	0	0	0	0	FS	0	0	0	0	0	0	0	0	0	0	0	0	0	0	0	0	0	0	0	0	0	0	0	0	0
YOR057W	SGT1	classical genetics	null	S288C	inviable	0	0	0	0	0	0	0	0	0	0	0	0	0	0	0	0	0	0	0	0	0	0	0	0	0	0	0	0	0	0	0	0	0	0	0	0	0	0	0	0	0	0	0	FS
YOR062C	YOR062C					0	0	0	0	0	0	0	0	0	0	0	0	0	0	0	0	0	0	0	0	0	0	0	0	0	0	0	0	0	0	Stop	0	0	0	0	0	0	0	0	0	0	0	0	0
YOR064C	YNG1					0	0	0	0	0	0	0	Stop	0	0	0	0	0	0	0	0	0	0	0	0	0	0	0	0	0	0	0	0	0	0	0	0	0	0	0	0	0	0	0	0	0	0	0	0
YOR101W	RAS1					0	0	0	0	0	0	0	0	0	0	0	0	0	0	0	0	0	0	0	0	0	0	0	0	0	0	0	0	0	0	0	0	0	0	0	0	0	0	0	0	0	0	0	0
YOR107W	RGS2					Stop	0	FS	FS	FS	FS	FS	0	FS	FS	FS	FS	Stop	FS	FS	FS	FS	FS	FS	FS	FS	FS	FS	FS	FS	FS	FS	FS	FS	FS	FS	FS	FS	FS	FS	FS	FS	Stop	FS	FS	0	FS	FS	FS
YOR118W	RTC5					0	0	0	0	0	0	0	0	0	0	0	0	0	0	0	0	0	0	0	0	0	0	0	FS	0	0	0	0	0	0	0	0	0	0	0	0	0	0	0	0	0	0	0	0
YOR120W	GCY1					0	0	0	0	0	0	0	0	0	0	0	0	0	0	0	0	0	0	0	0	0	0	0	0	0	0	0	0	0	0	0	0	0	0	0	0	0	0	0	0	0	0	0	0
YOR126C	IAH1					0	0	0	0	0	0	0	0	0	0	0	0	0	0	Stop	0	0	0	0	0	0	0	0	0	0	0	Stop	0	0	0	0	0	0	0	0	0	0	0	0	0	0	0	0	0
YOR129C	AFI1					0	0	0	0	0	0	0	0	0	0	0	Stop	0	0	0	Stop	0	0	0	0	0	0	0	0	0	0	0	0	0	0	0	0	0	0	0	0	0	0	0	0	0	0	0	0
YOR148C	SPP2	systematic mutation set	null	S288C	inviable	FS	FS	FS	FS	FS	FS	FS	FS	FS	FS	0	FS	FS	FS	0	FS	FS	FS	FS	FS	FS	FS	0	FS	FS	FS	FS	FS	FS	FS	FS	FS	FS	0	0	FS	FS	FS	0	0	0	FS	0	0
YOR161C-C	YOR161C-C					0	0	0	0	0	0	Stop	0	0	0	0	0	0	Stop	0	0	0	0	0	0	0	0	Stop	0	0	0	0	0	0	0	0	0	0	0	0	Stop	0	0	0	0	0	Stop	0	0
YOR172W	YRM1					0	0	0	0	0	0	0	0	0	0	0	0	0	0	0	0	0	0	0	0	0	0	0	0	0	0	0	0	0	0	0	0	0	0	0	0	0	0	0	0	0	0	0	0
YOR183W	FYV12					Stop	0	Stop	FS	0	FS	FS	FS	FS	Stop	0	Stop	Stop	0	Stop	0	0	FS	FS	Stop	0	Stop	0	Stop	FS	FS	FS	0	0	0	0	0	FS	0	0	0	FS	FS	FS	0	0	0	0	FS
YOR186W	YOR186W					0	0	0	0	0	0	0	0	0	0	Stop	0	0	0	0	0	0	0	0	0	0	0	0	0	0	0	0	0	0	0	0	0	0	0	0	0	0	0	0	0	0	0	Stop	0
YOR190W	SPR1					0	0	0	0	0	0	0	0	0	0	0	0	0	0	0	0	0	0	0	0	0	0	0	0	0	0	0	0	0	0	0	0	0	0	0	0	0	0	0	0	0	0	0	0
YOR196C	LIP5					0	0	0	0	0	0	0	0	0	0	0	0	0	0	0	0	0	0	0	0	0	0	0	0	0	0	0	0	0	0	0	0	0	0	0	0	0	0	0	0	0	0	0	0
YOR201C	MRM1					0	0	0	0	0	0	0	0	0	0	0	0	0	0	0	0	0	0	0	0	0	0	0	0	0	0	0	0	0	0	0	0	0	Stop	0	0	0	0	0	0	0	0	0	0
YOR220W	RCN2					0	0	0	0	0	FS	0	0	0	0	0	0	0	0	0	0	0	0	0	0	0	0	0	0	0	0	0	0	0	0	0	0	0	0	0	0	0	0	0	FS	0	0	0	0
YOR233W	KIN4					0	0	0	0	0	0	0	0	0	0	0	0	0	0	0	0	0	0	0	0	0	0	0	0	0	0	0	0	0	0	0	0	0	0	0	0	0	0	0	0	0	0	0	0
YOR241W	MET7					0	FS	0	0	0	0	0	FS	0	0	FS	0	0	FS	0	FS	FS	FS	0	0	0	0	FS	0	0	0	0	0	FS	FS	FS	FS	0	FS	FS	FS	0	0	FS	FS	0	FS	FS	FS
YOR262W	YOR262W	systematic mutation set	null	S288C	inviable	0	0	0	0	0	0	0	0	0	0	0	0	0	0	0	0	0	0	0	0	0	0	FS	0	0	0	0	0	0	0	0	0	0	0	0	0	0	0	0	0	0	0	0	0
YOR264W	DSE3					0	0	0	0	0	0	0	0	0	0	0	0	0	0	0	0	0	0	0	0	0	0	0	FS	0	0	0	0	0	0	0	0	0	0	0	0	0	0	0	0	0	0	0	0
YOR268C	YOR268C					0	0	0	0	0	0	0	0	0	0	0	0	0	0	0	0	0	0	0	0	0	0	0	0	0	0	0	0	0	0	0	0	0	0	0	0	0	0	FS	0	0	0	0	0
YOR273C	TPO4					0	0	0	0	0	0	0	0	0	0	0	0	0	0	0	0	0	0	0	0	0	0	0	0	0	0	0	0	0	0	0	0	0	0	0	0	0	0	0	0	0	0	0	0
YOR284W	HUA2					FS	0	0	0	0	0	0	0	0	0	0	0	0	0	0	0	0	0	0	0	0	0	0	0	0	0	Stop	0	Stop	0	0	0	0	0	0	0	0	0	0	0	0	0	0	0
YOR301W	RAX1					0	0	0	0	Stop	0	0	0	0	0	0	0	0	0	0	0	0	0	0	0	0	0	0	0	0	0	0	0	0	0	0	0	0	0	0	0	0	0	0	0	0	0	0	0
YOR307C	SLY41					0	0	0	0	0	0	0	0	0	0	0	0	0	0	0	0	0	0	0	0	0	0	0	0	0	0	0	0	0	0	0	0	0	0	0	0	0	0	0	0	0	0	0	0
YOR316C-A	YOR316C-A					0	FS	0	0	0	FS	FS	0	0	0	FS	0	0	0	0	FS	0	FS	0	0	0	0	0	0	0	0	FS	0	FS	FS	FS	FS	FS	0	0	0	0	0	0	0	0	0	FS	0
YOR316C	COT1					0	0	0	0	0	0	0	0	0	0	0	0	0	0	0	0	0	0	0	0	0	0	0	0	0	0	0	0	0	FS	FS	FS	0	0	0	0	0	0	0	0	0	0	0	0
YOR360C	PDE2					0	0	0	0	0	0	0	0	0	0	0	0	0	0	FS	0	0	0	0	0	0	0	0	FS	0	0	0	0	0	0	0	0	0	0	0	0	0	0	0	0	0	0	0	0
YOR361C	PRT1	systematic mutation set	null	S288C	inviable	0	0	0	0	0	0	0	0	0	0	0	0	0	0	0	0	0	0	0	Stop	0	0	0	0	0	0	0	0	0	0	0	0	0	0	0	0	0	0	0	0	0	0	0	0
YOR365C	YOR365C					0	0	0	0	0	0	0	0	0	0	0	0	0	0	0	0	0	0	0	0	0	0	0	0	Stop	0	0	0	0	0	0	0	0	0	0	0	0	0	0	0	0	0	0	0
YOR376W-A	YOR376W-A					0	0	0	0	0	0	0	0	0	0	0	0	0	0	0	FS	0	0	0	0	0	0	0	0	0	0	0	0	0	0	0	0	0	0	0	FS	0	0	0	0	0	0	0	0
YOR378W	YOR378W					0	0	0	0	0	0	0	0	0	0	0	0	0	0	0	0	0	0	0	0	0	0	0	0	0	0	0	0	0	0	0	0	0	FS	0	0	0	0	0	0	0	0	0	0
YOR380W	RDR1					0	0	0	0	0	0	0	0	Stop	0	0	0	0	0	0	0	0	0	0	Stop	0	0	0	0	0	0	0	0	0	0	0	0	0	0	0	0	Stop	0	0	0	0	0	0	0
YPL014W	YPL014W					0	FS	0	0	0	0	0	FS	0	0	0	0	0	0	0	0	0	0	0	0	0	0	0	0	0	0	0	0	0	0	0	0	0	0	0	0	0	0	0	0	0	0	0	0
YPL015C	HST2					0	0	0	0	0	0	0	0	0	0	0	0	0	0	0	0	0	0	0	0	0	0	0	0	0	0	0	0	0	0	0	0	0	0	0	0	0	0	0	0	0	0	0	0
YPL017C	IRC15					0	0	0	0	0	0	0	0	0	0	0	0	0	0	0	0	0	0	0	0	0	0	0	0	0	0	0	0	0	0	0	0	0	0	0	0	0	0	0	0	0	0	0	FS
YPL021W	ECM23					0	0	0	0	0	0	0	0	0	0	0	0	0	0	0	0	0	0	0	0	0	0	0	0	0	0	0	0	0	0	0	0	0	0	0	0	0	0	0	0	0	0	0	0
YPL027W	SMA1					0	0	0	0	0	0	0	0	0	0	0	0	0	0	0	0	0	0	0	0	0	0	0	0	0	0	0	0	0	0	0	0	0	Stop	0	0	0	0	0	0	0	0	0	0
YPL038W-A	YPL038W-A					Stop	Stop	Stop	Stop	0	Stop	Stop	Stop	Stop	Stop	0	Stop	Stop	FS	Stop	0	0	Stop	Stop	Stop	Stop	Stop	0	Stop	Stop	0	Stop	Stop	Stop	Stop	0	0	FS	0	0	0	Stop	Stop	FS	0	Stop	FS	0	FS
YPL041C	YPL041C					0	0	0	0	0	0	0	0	0	0	0	0	0	0	0	0	0	0	0	0	0	0	0	0	0	0	0	0	0	0	0	0	0	0	0	0	0	0	0	0	0	0	0	0
YPL054W	LEE1					0	0	0	0	0	0	0	0	0	0	0	0	0	0	0	0	0	0	0	0	0	0	0	FS	0	0	0	0	0	0	0	0	0	0	0	0	0	0	0	0	0	0	0	0
YPL056C	LCL1					FS	FS	FS	FS	FS	FS	FS	FS	FS	FS	FS	FS	FS	FS	FS	FS	FS	FS	FS	FS	FS	FS	Stop	FS	FS	FS	FS	0	FS	FS	FS	FS	FS	FS	FS	FS	FS	FS	FS	FS	FS	FS	FS	FS
YPL058C	PDR12					0	0	0	0	0	0	0	0	0	0	0	0	0	0	0	0	0	0	0	0	0	0	0	0	0	0	0	0	0	0	0	0	0	0	0	0	0	0	0	0	0	0	0	0
YPL072W	UBP16					0	FS	0	0	0	0	0	FS	0	0	FS	0	0	0	0	0	0	0	0	0	0	0	FS	FS	0	0	0	0	0	0	0	0	0	FS	FS	0	0	0	0	FS	0	0	FS	0
YPL092W	SSU1					0	0	0	0	0	0	0	0	0	0	0	0	0	0	0	0	0	0	0	0	0	0	0	0	0	0	0	0	0	0	0	0	0	0	0	0	0	0	0	0	0	0	0	0
YPL098C	MGR2					0	0	0	0	0	0	0	0	0	0	0	0	0	0	0	Stop	0	0	0	0	0	0	0	0	0	0	0	0	0	0	0	0	0	0	0	0	0	0	0	0	0	0	0	0
YPL100W	ATG21					0	0	0	0	0	0	0	0	0	0	0	0	0	0	0	0	0	0	0	0	0	0	0	0	0	0	0	0	0	0	0	0	0	0	0	0	0	0	0	0	0	0	0	0
YPL109C	YPL109C					FS	FS	FS	FS	0	0	0	FS	0	FS	0	FS	FS	FS	FS	FS	FS	0	FS	FS	0	FS	0	0	0	0	0	0	0	0	0	0	0	FS	FS	FS	FS	FS	0	0	0	FS	0	0
YPL119C-A	YPL119C-A					0	FS	0	0	0	FS	FS	FS	0	0	FS	Stop	0	FS	0	0	0	0	0	0	FS	0	FS	0	0	0	0	Stop	0	FS	FS	FS	Stop	FS	FS	FS	0	0	FS	FS	0	FS	FS	FS
YPL119C	DBP1					0	0	0	0	0	0	0	0	0	0	0	0	0	0	0	0	0	0	0	0	0	0	FS	0	0	0	0	0	0	0	0	0	0	0	0	0	0	0	0	0	0	0	0	0
YPL120W	VPS30					0	0	0	0	0	0	0	0	0	0	0	0	0	0	0	0	0	0	0	0	0	0	FS	0	0	0	0	0	0	0	0	0	0	0	0	0	0	0	0	0	0	0	0	0
YPL139C	UME1					0	0	0	0	0	0	0	0	0	0	0	0	0	0	0	Stop	0	0	0	0	0	0	0	0	0	0	0	0	0	0	0	0	0	0	0	0	0	0	0	0	0	0	0	0
YPL147W	PXA1					0	0	0	0	0	0	0	0	0	0	0	0	0	0	0	0	0	0	0	0	0	0	0	0	0	0	0	0	0	0	0	0	0	0	0	0	0	0	0	0	0	0	0	0
YPL156C	PRM4					0	0	0	0	0	0	0	0	0	0	0	0	0	0	0	0	0	0	0	0	0	0	0	0	0	0	0	0	0	0	0	0	0	0	0	0	0	0	0	0	0	0	0	0
YPL164C	MLH3					0	0	0	0	0	0	0	0	0	0	0	0	0	0	0	0	0	0	0	0	0	0	0	0	0	0	0	0	0	0	0	0	0	0	0	0	0	0	0	0	0	0	0	0
YPL165C	SET6					0	0	0	0	0	0	0	0	0	0	0	0	0	0	0	Stop	0	0	0	0	0	0	0	0	0	0	0	0	0	0	0	0	0	0	0	0	0	0	0	0	0	0	0	0
YPL166W	ATG29					0	Stop	0	Stop	0	0	0	Stop	0	0	0	0	0	0	0	0	Stop	Stop	0	0	0	0	0	0	0	0	0	Stop	0	0	0	0	0	0	0	0	0	0	0	Stop	Stop	0	0	0
YPL177C	CUP9					0	0	0	0	0	0	0	0	0	0	0	0	0	0	0	0	0	0	0	0	0	0	0	0	0	0	Stop	0	0	0	0	0	0	0	0	0	0	0	0	0	0	0	0	0
YPL179W	PPQ1					0	0	0	0	0	0	0	0	0	0	0	0	0	0	0	0	0	0	0	0	0	0	0	0	0	0	0	0	0	0	0	0	0	0	0	0	0	0	0	0	0	0	0	0
YPL189W	GUP2					0	0	0	0	0	FS	0	0	0	0	0	0	0	0	0	0	0	0	0	0	0	0	0	0	0	0	0	0	0	0	0	0	0	0	0	0	0	0	0	0	0	0	0	0
YPL191C	YPL191C					0	0	0	0	0	0	0	0	0	0	0	0	0	0	0	0	0	0	0	0	0	0	0	0	0	0	0	0	0	0	0	0	0	0	0	0	0	0	0	0	0	0	0	0
YPL216W	YPL216W					0	Stop	0	0	0	0	0	0	0	0	0	FS	0	0	0	0	0	0	0	0	FS	0	0	0	0	0	0	Stop	0	0	0	0	0	0	0	0	0	0	0	0	0	0	0	0
YPL223C	GRE1					0	Stop	0	0	0	0	0	0	0	0	0	0	0	0	0	0	0	0	0	0	0	0	0	0	0	0	0	0	0	0	0	0	0	0	0	0	0	0	0	0	0	0	0	0
YPL224C	MMT2					0	0	0	0	0	0	0	0	0	0	Stop	0	0	0	0	0	0	0	0	0	0	0	0	0	0	0	0	0	0	0	0	0	0	0	0	0	0	0	0	0	0	0	Stop	0
YPL247C	YPL247C					0	0	0	0	0	0	0	0	0	0	0	0	0	0	0	0	0	0	0	0	0	0	0	0	0	0	0	0	0	0	0	0	0	0	0	0	0	0	0	0	0	0	0	0
YPL248C	GAL4					0	0	0	0	0	0	0	0	0	0	0	0	0	0	0	0	0	0	0	0	0	0	0	0	0	0	0	0	0	0	FS	FS	0	0	0	0	0	0	0	0	0	0	0	0
YPL267W	ACM1					0	0	0	0	0	0	0	0	0	0	0	0	0	0	0	0	0	0	0	0	0	0	0	0	0	0	0	0	0	0	FS	0	0	0	0	0	0	0	0	0	0	0	0	0
YPR004C	AIM45					0	0	0	0	FS	FS	0	FS	0	0	FS	0	0	FS	0	FS	FS	0	0	0	FS	0	FS	0	0	0	FS	FS	0	0	FS	FS	FS	FS	FS	FS	0	0	FS	FS	0	FS	FS	FS
YPR011C	YPR011C					0	0	0	0	0	0	0	0	0	0	0	0	0	0	0	0	0	0	0	0	0	0	0	0	0	0	0	0	0	0	0	0	0	0	0	0	0	0	0	0	0	0	0	0
YPR041W	TIF5	systematic mutation set	null	S288C	inviable	0	0	0	0	0	0	0	0	0	0	Stop	0	0	0	0	0	0	0	0	0	0	0	0	0	0	0	0	0	0	0	0	0	0	0	0	0	0	0	0	0	0	0	Stop	0
YPR065W	ROX1					0	0	0	0	0	0	0	0	0	0	Stop	0	0	0	0	0	0	0	0	0	0	0	0	0	0	0	0	0	0	0	0	0	0	0	0	0	0	0	0	0	0	0	Stop	0
YPR071W	YPR071W					0	0	0	0	0	0	0	0	0	0	0	0	0	0	0	0	0	0	0	0	0	0	0	0	0	0	0	0	0	0	0	0	0	0	0	0	0	0	0	0	0	0	0	0
YPR073C	LTP1					0	0	0	0	0	0	0	0	0	0	0	0	0	0	0	0	0	0	0	0	0	0	0	0	0	0	0	0	0	0	0	0	0	0	0	0	0	0	0	0	0	0	0	0
YPR078C	YPR078C					0	0	0	0	0	0	0	0	0	0	0	0	0	0	0	0	0	0	0	0	0	0	0	0	0	0	0	0	0	0	0	0	Stop	0	0	0	0	0	0	0	0	0	0	0
YPR091C	YPR091C					0	0	0	0	0	0	0	0	0	0	0	0	0	0	0	0	0	0	0	0	0	0	0	0	0	Stop	0	0	0	0	Stop	Stop	0	0	0	0	0	0	0	0	0	0	0	0
YPR096C	YPR096C					0	0	0	0	0	0	0	0	0	0	0	0	0	FS	FS	0	FS	0	0	0	FS	0	0	0	0	FS	0	0	0	0	FS	FS	0	FS	FS	FS	0	0	FS	FS	0	FS	0	FS
YPR114W	YPR114W					0	0	0	0	0	0	0	0	0	0	0	0	0	0	0	0	0	0	0	0	0	0	0	0	0	0	0	0	0	0	0	0	0	0	0	0	0	0	0	0	0	0	0	0
YPR117W	YPR117W					0	0	0	0	0	0	0	0	0	0	0	0	0	0	0	0	0	0	0	0	0	0	0	0	0	0	0	0	0	0	0	0	0	0	0	0	0	0	0	0	0	0	0	0
YPR164W	MMS1					0	0	0	0	0	0	0	0	0	0	FS	0	0	0	0	0	0	0	0	0	0	0	0	0	0	0	0	0	0	0	0	0	0	0	0	0	0	0	0	0	0	0	FS	0
YPR179C	HDA3					0	0	0	0	0	0	0	0	0	0	0	0	0	0	0	0	0	0	0	0	0	0	0	0	0	0	FS	FS	0	0	0	0	0	0	0	0	0	0	0	0	0	0	0	0
YOR031W	CRS5	see note				Stop -> Glu	Stop -> Glu	Stop -> Glu	Stop -> Glu	Stop -> Glu	Stop -> Glu	Stop -> Glu	Stop -> Glu	Stop -> Glu	Stop -> Glu	Stop -> Glu	Stop -> Glu	Stop -> Glu	Stop -> Glu	Stop -> Glu	Stop -> Glu	Stop -> Glu	Stop -> Glu	Stop -> Glu	Stop -> Glu	Stop -> Glu	Stop -> Glu	Stop -> Glu	Stop -> Glu	Stop -> Glu	Stop -> Glu	Stop -> Glu	Stop -> Glu	Stop -> Glu	Stop -> Glu	Stop -> Glu	Stop -> Glu	Stop -> Glu	Stop -> Glu	Stop -> Glu	Stop -> Glu	Stop -> Glu	Stop -> Glu	Stop -> Glu	Stop -> Glu	Stop -> Glu	Stop -> Glu	Stop -> Glu	Stop -> Glu
KHR (D00905)	KHR (D00905)					-	0	0	-	0	-	-	-	0	-	FS	-	-	FS	FS	0	-	Stop	0	0	0	0	FS	-	0	-	-	0	FS	0	-	-	-	FS	0	FS	0	0	FS	FS	-	FS	FS	FS
KHS(AAFW02000048.1)	KHS(AAFW02000048.1)					Stop	Stop	0	0	0	0	0	Stop	0	0	0	0	Stop	Stop	0	Stop	0	0	0	0	Stop	0	0	Stop	0	0	Stop	0	0	0	Stop	Stop	Stop	0	Stop	Stop	0	0	Stop	Stop	0	Stop	0	Stop
note: Re-sequencing in S288c strain background by SGD has confirmed that there is a nonsense mutation in codon 9 of CRS5, which should encode Glu.
[truncated: 49 more columns]

## Sheet: FS_Stop positions
systematic name	standard name	orf length	YJM1078	YJM1083	YJM1129	YJM1133	YJM1190	YJM1199	YJM1202	YJM1208	YJM1242	YJM1244	YJM1248	YJM1250	YJM1252	YJM1273	YJM1304	YJM1307	YJM1311	YJM1326	YJM1332	YJM1336	YJM1338	YJM1341	YJM1342	YJM1355	YJM1356	YJM1381	YJM1383	YJM1385	YJM1386	YJM1387	YJM1388	YJM1389	YJM1399	YJM1400	YJM1401	YJM1402	YJM1415	YJM1417	YJM1418	YJM1419	YJM1433	YJM1434	YJM1439	YJM1443	YJM1444	YJM1447	YJM1450
YAL002W	VPS8	3825	0	0	0	0	0	0	0	0	0	0	0	0	0	0	0	0	0	0	0	0	0	0	0	0	0	0	0	0	0	0	0	0	0	0	0	0	0	0	0	0	0	0	0	0	0	0	0
YAL037W	YAL037W	804	530 FrSh 4 T->-	0	0	0	0	0	0	0	0	0	0	0	530 FrSh 4 T->-	0	0	0	0	0	0	0	0	0	0	0	0	0	0	0	0	0	0	0	0	0	0	0	0	0	0	0	0	0	0	0	0	0	0
YAL039C	CYC3	810	0	0	0	0	0	0	0	0	0	0	0	0	0	0	0	0	0	0	0	0	0	0	0	0	0	0	0	0	0	0	0	0	0	0	806 FrSh 1 C->-	0	0	0	0	0	0	0	0	0	0	0	0
YAL059W	ECM1	639	16 Stop 1 C->T	16 Stop 1 C->T	16 Stop 1 C->T	16 Stop 1 C->T	16 Stop 1 C->T	16 Stop 1 C->T	16 Stop 1 C->T	16 Stop 1 C->T	16 Stop 1 C->T	16 Stop 1 C->T	16 Stop 1 C->T	16 Stop 1 C->T	16 Stop 1 C->T	16 Stop 1 C->T	16 Stop 1 C->T	16 Stop 1 C->T	16 Stop 1 C->T	16 Stop 1 C->T	16 Stop 1 C->T	16 Stop 1 C->T	16 Stop 1 C->T	16 Stop 1 C->T	16 Stop 1 C->T	16 Stop 1 C->T	16 Stop 1 C->T	16 Stop 1 C->T	16 Stop 1 C->T	16 Stop 1 C->T	16 Stop 1 C->T	16 Stop 1 C->T	16 Stop 1 C->T	16 Stop 1 C->T	16 Stop 1 C->T	16 Stop 1 C->T	16 Stop 1 C->T	16 Stop 1 C->T	16 Stop 1 C->T	16 Stop 1 C->T	16 Stop 1 C->T	16 Stop 1 C->T	16 Stop 1 C->T	16 Stop 1 C->T	16 Stop 1 C->T	16 Stop 1 C->T	16 Stop 1 C->T	16 Stop 1 C->T	16 Stop 1 C->T
YAR023C	YAR023C	540	0	0	0	121 FrSh 1 C->-	0	121 FrSh 1 C->-	121 FrSh 1 C->-	0	0	0	0	0	0	0	0	0	121 FrSh 1 C->-	121 FrSh 1 C->-	0	0	0	0	0	0	121 FrSh 1 C->-	0	121 FrSh 1 C->-	0	121 FrSh 1 C->-	0	0	0	121 FrSh 1 C->-	0	0	0	0	121 FrSh 1 C->-	0	0	0	0	0	0	121 FrSh 1 C->-	0	0
YBL005W	PDR3	2931	0	0	0	0	0	0	0	0	0	1717 FrSh 7 -->T	0	0	0	0	0	0	0	0	0	0	0	0	0	0	0	0	0	0	0	0	0	0	0	0	0	0	0	0	0	0	0	0	0	0	0	0	0
YBL008W-A	YBL008W-A	240	0	0	0	0	0	0	0	0	0	0	199 Stop 1 C->T	0	0	0	0	0	0	0	0	0	0	0	0	0	0	0	0	0	0	0	0	0	0	0	0	0	0	0	0	0	0	0	199 Stop 1 C->T	0	0	0	0
YBL033C	RIB1	1038	0	0	0	0	0	0	0	0	0	0	0	0	0	0	0	0	0	0	0	0	0	0	0	0	0	0	0	0	0	0	0	0	0	0	0	0	0	0	0	0	0	0	0	0	0	988 Stop 1 C->T	0
YBL039W-B	YBL039W-B	180	0	0	0	0	0	0	0	0	0	0	0	0	0	0	0	0	170 FrSh 1 -->A	0	0	0	0	0	0	0	0	0	0	0	0	0	0	0	0	0	0	0	0	0	0	0	0	0	0	0	0	0	0
YBL044W	YBL044W	369	45 FrSh 1 -->A	45 FrSh 1 -->A	45 FrSh 1 -->A	45 FrSh 1 -->A	6 FrSh 1 T->-	31 FrSh 1 A->-	45 FrSh 1 -->A	45 FrSh 1 -->A	6 FrSh 1 T->-	45 FrSh 1 -->A	45 FrSh 1 -->A	6 FrSh 1 T->-	45 FrSh 1 -->A	45 FrSh 1 -->A	45 FrSh 1 -->A	45 FrSh 1 -->A	45 FrSh 1 -->A	45 FrSh 1 -->A	45 FrSh 1 -->A	45 FrSh 1 -->A	31 FrSh 1 A->-	45 FrSh 1 -->A	45 FrSh 1 -->A	31 FrSh 1 A->-	6 FrSh 1 T->-	45 FrSh 1 -->A	31 FrSh 1 A->-	45 FrSh 1 -->A	31 FrSh 1 A->-	45 FrSh 1 -->A	45 FrSh 1 -->A	45 FrSh 1 -->A	45 FrSh 1 -->A	124 FrSh 1 C->-	45 FrSh 1 -->A	45 FrSh 1 -->A	6 FrSh 1 T->-	6 FrSh 1 T->-	351 Stop 1 G->A	45 FrSh 1 -->A	45 FrSh 1 -->A	45 FrSh 1 -->A	45 FrSh 1 -->A	31 FrSh 1 A->-	31 FrSh 1 A->-	31 FrSh 1 A->-	45 FrSh 1 -->A
YBL086C	YBL086C	1401	0	0	0	0	0	0	0	0	0	0	0	0	0	0	0	0	0	0	0	0	0	0	0	1335 FrSh 1 C->-	0	0	0	0	0	0	0	0	0	0	0	0	0	0	0	0	0	0	0	0	0	0	0
YBL106C	SRO77	3033	0	0	2434 Stop 1 A->T	0	0	0	0	0	0	0	0	0	0	0	0	1325 FrSh 2 -->A	0	0	0	0	0	0	0	0	0	0	0	0	0	0	0	0	0	0	0	0	0	0	0	0	0	0	0	0	0	0	0
YBR029C	CDS1	1374	0	0	0	0	0	0	0	0	0	0	0	0	0	0	0	0	0	0	0	0	0	0	1358 FrSh 2 -->T	0	0	0	0	0	0	0	0	0	0	0	0	0	0	0	0	0	0	0	0	0	0	0	0
YBR063C	YBR063C	1215	0	0	0	0	0	0	0	0	0	0	0	0	0	0	0	0	0	263 FrSh 1 -->A	0	0	0	0	0	0	0	0	0	0	0	0	0	0	0	0	0	0	0	0	0	0	0	0	0	0	0	0	0
YBR069C	TAT1	1860	0	0	0	0	0	0	0	0	0	0	0	0	0	0	0	0	0	0	0	0	0	0	0	0	0	0	0	0	0	0	0	0	0	0	0	0	0	0	0	0	0	0	0	0	0	0	0
YBR073W	RDH54	2877	49 Stop 1 G->T	67 FrSh 1 -->G	67 FrSh 1 -->G	67 FrSh 1 -->G	67 FrSh 1 -->G	67 FrSh 1 -->G	67 FrSh 1 -->G	67 FrSh 1 -->G	67 FrSh 1 -->G	67 FrSh 1 -->G	67 FrSh 1 -->G	67 FrSh 1 -->G	67 FrSh 1 -->G	67 FrSh 1 -->G	67 FrSh 1 -->G	67 FrSh 1 -->G	67 FrSh 1 -->G	67 FrSh 1 -->G	67 FrSh 1 -->G	67 FrSh 1 -->G	67 FrSh 1 -->G	67 FrSh 1 -->G	66 FrSh 1 -->C	67 FrSh 1 -->G	67 FrSh 1 -->G	67 FrSh 1 -->G	67 FrSh 1 -->G	67 FrSh 1 -->G	67 FrSh 1 -->G	67 FrSh 1 -->G	67 FrSh 1 -->G	67 FrSh 1 -->G	67 FrSh 1 -->G	67 FrSh 1 -->G	67 FrSh 1 -->G	67 FrSh 1 -->G	67 FrSh 1 -->G	67 FrSh 1 -->G	67 FrSh 1 -->G	67 FrSh 1 -->G	67 FrSh 1 -->G	67 FrSh 1 -->G	67 FrSh 1 -->G	67 FrSh 1 -->G	67 FrSh 1 -->G	67 FrSh 1 -->G	67 FrSh 1 -->G
YBR081C	SPT7	3999	3964 FrSh 1 T->-	0	0	0	0	0	0	0	0	0	0	0	0	0	0	0	0	0	0	0	0	0	0	0	0	0	0	0	0	0	0	0	0	0	0	0	0	0	0	0	0	0	0	0	0	0	0
YBR083W	TEC1	1461	0	0	0	0	0	0	0	0	0	0	0	0	0	0	0	0	0	0	0	0	0	0	0	0	0	0	0	0	0	0	0	0	0	0	0	0	0	0	0	0	0	0	0	0	0	0	0
YBR096W	YBR096W	693	0	0	0	0	0	0	0	0	0	0	0	0	0	0	0	0	0	0	0	0	0	0	0	0	0	0	0	0	0	0	0	0	0	0	0	0	0	0	0	0	0	0	0	0	0	0	0
YBR103W	SIF2	1608	0	0	0	0	0	0	0	0	0	0	0	0	0	0	0	0	0	0	0	0	0	0	0	0	0	0	0	0	0	0	0	0	0	0	0	0	0	0	0	0	0	0	0	0	0	0	0
YBR117C	TKL2	2046	0	0	0	0	0	0	0	0	0	0	0	0	0	0	0	0	0	0	0	0	0	0	0	0	0	0	0	0	0	0	0	0	0	0	0	0	0	0	0	0	0	0	0	0	0	0	0
YBR123C	TFC1	1950	0	0	0	0	0	0	0	0	0	0	0	0	0	0	0	0	0	0	0	0	0	0	0	0	0	0	0	0	0	0	0	0	0	0	0	0	0	0	0	0	0	0	0	0	0	0	0
YBR138C	YBR138C	1575	0	0	0	0	0	0	0	0	0	0	0	0	0	0	0	0	0	0	0	0	0	0	0	0	0	0	0	0	0	0	0	0	0	0	0	0	0	0	0	0	0	0	0	0	0	0	0
YBR152W	SPP381	876	0	0	0	0	667 Stop 1 C->T	0	667 Stop 1 C->T	0	0	0	0	0	0	0	0	0	0	0	0	0	0	0	0	0	0	0	0	0	0	0	0	0	0	0	0	0	0	0	0	0	0	0	0	0	667 Stop 1 C->T	0	0
YBR161W	CSH1	1131	0	0	0	0	0	0	0	0	0	0	0	0	0	0	0	0	0	0	141 FrSh 1 -->C	0	0	0	0	0	0	0	0	0	0	0	0	0	0	0	0	0	0	0	0	0	0	0	0	0	0	0	0
YBR182C-A	YBR182C-A	195	37 FrSh 1 -->T	0	37 FrSh 1 -->T	37 FrSh 1 -->T	37 FrSh 1 -->T	37 FrSh 1 -->T	37 FrSh 1 -->T	0	37 FrSh 1 -->T	37 FrSh 1 -->T	37 FrSh 1 -->T	37 FrSh 1 -->T	37 FrSh 1 -->T	37 FrSh 1 -->T	37 FrSh 1 -->T	37 FrSh 1 -->T	37 FrSh 1 -->T	37 FrSh 1 -->T	37 FrSh 1 -->T	37 FrSh 1 -->T	37 FrSh 1 -->T	37 FrSh 1 -->T	122 Stop 1 C->G	37 FrSh 1 -->T	37 FrSh 1 -->T	37 FrSh 1 -->T	37 FrSh 1 -->T	37 FrSh 1 -->T	37 FrSh 1 -->T	37 FrSh 1 -->T	37 FrSh 1 -->T	37 FrSh 1 -->T	37 FrSh 1 -->T	37 FrSh 1 -->T	37 FrSh 1 -->T	37 FrSh 1 -->T	37 FrSh 1 -->T	37 FrSh 1 -->T	37 FrSh 1 -->T	37 FrSh 1 -->T	0	37 FrSh 1 -->T	37 FrSh 1 -->T	37 FrSh 1 -->T	37 FrSh 1 -->T	0	37 FrSh 1 -->T
YBR184W	YBR184W	1572	0	0	0	0	0	0	0	0	0	0	398 FrSh 1 A->-	0	0	0	0	0	0	0	0	0	0	0	0	0	0	0	0	0	0	0	0	0	0	398 FrSh 1 A->-	0	0	0	0	0	0	0	0	398 FrSh 1 A->-	0	0	0	0
YBR196C-A	YBR196C-A	150	0	0	0	0	0	0	0	0	0	0	0	0	0	0	0	0	0	0	0	0	0	0	0	0	0	0	0	0	0	0	0	0	0	0	0	0	0	0	0	0	0	0	0	0	0	0	0
YBR196C-B	YBR196C-B	105	0	0	0	28 FrSh 1 -->A	28 FrSh 1 -->A	0	0	0	0	0	28 FrSh 1 -->A	28 FrSh 1 -->A	0	0	0	0	0	0	0	0	0	0	28 FrSh 1 -->A	0	0	0	0	0	0	0	0	0	0	28 FrSh 1 -->A	0	0	0	0	0	0	0	0	28 FrSh 1 -->A	28 FrSh 1 -->A	28 FrSh 1 -->A	28 FrSh 1 -->A	0
YBR200W-A	YBR200W-A	165	0	0	0	122 FrSh 1 C->-	122 FrSh 1 C->-	0	0	0	0	0	0	0	0	0	0	0	0	0	0	0	39 Stop 1 G->A	0	0	0	0	0	0	0	0	0	0	0	0	0	0	39 Stop 1 G->A	0	0	0	0	0	0	0	122 FrSh 1 C->-	122 FrSh 1 C->-	0	0
YBR278W	DPB3	606	0	0	0	0	0	0	0	0	0	0	0	0	0	0	0	0	0	0	0	0	0	0	0	0	0	0	0	0	0	0	0	0	0	0	0	0	0	0	0	0	0	0	0	0	0	0	529 FrSh 2 -->A
YBR284W	YBR284W	2394	0	0	0	0	385 Stop 1 C->T	0	0	0	0	0	0	0	0	0	0	0	0	385 Stop 1 C->T	0	0	0	0	0	0	0	0	0	0	0	0	0	385 Stop 1 C->T	0	0	0	0	0	0	0	0	0	0	0	0	0	0	0
YBR293W	VBA2	1425	0	0	0	0	0	0	0	0	0	0	0	0	0	0	0	0	0	0	0	0	0	0	0	0	0	0	0	0	0	0	0	0	0	0	0	0	0	0	0	0	1154 Stop 1 C->A	0	0	0	0	0	0
YBR294W	SUL1	2580	0	0	0	0	0	0	0	0	0	0	0	0	0	0	0	0	0	0	0	0	0	0	0	0	0	0	0	0	0	2011 Stop 1 C->T	0	0	0	1059 Stop 1 G->A	0	0	0	0	0	0	0	0	0	0	0	0	0
YBR296C	PHO89	1725	0	0	0	0	0	0	0	0	0	0	0	0	0	0	0	0	0	0	0	0	0	0	0	0	0	0	0	0	0	0	0	0	0	0	0	0	0	0	0	0	0	0	0	0	0	0	0
YCL001W-B	YCL001W-B	255	0	223 FrSh 7 A->-	0	0	0	0	0	0	0	0	0	0	0	0	216 FrSh 1 -->C	0	0	0	0	0	0	0	0	0	0	0	0	0	0	0	0	0	0	0	0	0	0	0	0	0	0	0	0	0	0	0	0
YCL033C	MXR2	507	0	0	0	0	0	0	0	0	0	0	55 Stop 1 A->T	0	0	0	0	0	0	0	0	0	0	0	0	0	0	0	0	0	0	0	0	0	0	0	0	0	0	0	0	0	0	0	55 Stop 1 A->T	0	0	0	0
YCL042W	YCL042W	360	16 FrSh 1 -->A	121 Stop 1 A->T	16 FrSh 1 -->A	16 FrSh 1 -->A	16 FrSh 1 -->A	16 FrSh 1 -->A	16 FrSh 1 -->A	17 FrSh 1 T->-	16 FrSh 1 -->A	16 FrSh 1 -->A	17 FrSh 1 T->-	92 FrSh 1 -->C	16 FrSh 1 -->A	86 FrSh 1 -->G	92 FrSh 1 -->C	0	16 FrSh 1 -->A	16 FrSh 1 -->A	16 FrSh 1 -->A	16 FrSh 1 -->A	86 FrSh 1 -->G	16 FrSh 1 -->A	16 FrSh 1 -->A	16 FrSh 1 -->A	16 FrSh 1 -->A	16 FrSh 1 -->A	16 FrSh 1 -->A	16 FrSh 1 -->A	92 FrSh 1 -->C	16 FrSh 1 -->A	0	0	21 FrSh 2 -->A	16 FrSh 1 -->A	16 FrSh 1 -->A	16 FrSh 1 -->A	16 FrSh 1 -->A	16 FrSh 1 -->A	17 FrSh 1 T->-	17 FrSh 1 T->-	86 FrSh 1 -->G	86 FrSh 1 -->G	17 FrSh 1 T->-	86 FrSh 1 -->G	16 FrSh 1 -->A	86 FrSh 4 -->G	16 FrSh 1 -->A
YCL049C	YCL049C	939	0	0	410 Stop 1 C->A	0	410 Stop 1 C->A	0	0	0	410 Stop 1 C->A	532 FrSh 1 -->A	0	0	0	0	0	0	410 Stop 1 C->A	410 Stop 1 C->A	0	410 Stop 1 C->A	0	648 Stop 1 T->A	0	0	410 Stop 1 C->A	0	410 Stop 1 C->A	0	0	410 Stop 1 C->A	0	0	0	0	0	0	0	0	0	0	0	0	0	0	0	0	410 Stop 1 C->A
YCR018C	SRD1	666	0	0	0	0	0	0	0	0	0	0	0	0	0	0	0	0	0	0	0	0	0	0	0	0	0	0	0	0	0	0	0	220 FrSh 1 -->A	625 FrSh 1 -->A	0	0	0	0	0	0	0	0	0	0	0	0	0	0
YCR020C	PET18	648	0	0	0	0	0	0	0	0	0	0	0	0	0	0	0	0	0	0	0	0	0	0	0	0	0	0	0	0	0	0	0	0	0	0	0	0	0	0	0	0	0	0	0	0	0	0	0
YCR024C-B	YCR024C-B	267	153 FrSh 1 T->-	153 FrSh 1 T->-	153 FrSh 1 T->-	153 FrSh 1 T->-	153 FrSh 1 T->-	153 FrSh 1 T->-	153 FrSh 1 T->-	153 FrSh 1 T->-	153 FrSh 1 T->-	153 FrSh 1 T->-	153 FrSh 1 T->-	153 FrSh 1 T->-	153 FrSh 1 T->-	153 FrSh 1 T->-	153 FrSh 1 T->-	153 FrSh 1 T->-	153 FrSh 1 T->-	153 FrSh 1 T->-	153 FrSh 1 T->-	153 FrSh 1 T->-	153 FrSh 1 T->-	153 FrSh 1 T->-	153 FrSh 1 T->-	153 FrSh 1 T->-	153 FrSh 1 T->-	153 FrSh 1 T->-	153 FrSh 1 T->-	153 FrSh 1 T->-	153 FrSh 1 T->-	153 FrSh 1 T->-	153 FrSh 1 T->-	153 FrSh 1 T->-	153 FrSh 1 T->-	153 FrSh 1 T->-	153 FrSh 1 T->-	153 FrSh 1 T->-	153 FrSh 1 T->-	153 FrSh 1 T->-	153 FrSh 1 T->-	153 FrSh 1 T->-	153 FrSh 1 T->-	153 FrSh 1 T->-	153 FrSh 1 T->-	153 FrSh 1 T->-	153 FrSh 1 T->-	0	153 FrSh 1 T->-
YCR050C	YCR050C	309	282 Stop 1 G->A	0	0	0	0	0	0	0	0	0	0	0	0	0	0	0	0	0	0	0	0	0	0	0	0	0	0	0	0	0	0	0	0	0	0	0	0	0	0	0	0	0	0	0	0	0	0
YCR059C	YIH1	777	0	0	0	0	0	0	0	0	0	0	0	0	0	0	0	0	0	0	0	0	0	0	0	0	0	0	0	0	0	0	0	0	0	0	0	0	0	0	0	0	0	0	0	0	0	0	0
YCR073C	SSK22	3996	0	0	0	0	1057 FrSh 1 -->A	0	0	0	0	0	0	0	0	0	0	0	0	0	0	0	0	0	0	0	0	1057 FrSh 1 -->A	0	0	0	0	0	0	0	0	0	0	0	0	0	0	0	0	0	0	0	0	0
YCR075C	ERS1	783	0	0	0	0	0	0	0	0	0	0	0	0	0	0	0	0	0	0	0	0	0	0	0	0	0	0	0	0	0	0	0	0	0	0	186 Stop 1 G->A	0	0	0	0	0	0	0	0	0	0	0	0
YCR092C	MSH3	3057	0	0	0	0	0	0	0	0	0	0	0	3049 FrSh 1 A->-	0	0	0	0	0	0	0	0	0	0	0	0	0	0	0	0	3049 FrSh 1 A->-	0	0	0	3049 FrSh 1 A->-	0	0	0	0	0	0	0	0	0	0	0	0	0	0
YCR093W	CDC39	6327	0	0	0	0	0	0	0	0	0	0	0	0	0	0	0	0	0	0	0	0	0	0	0	0	0	0	0	0	0	0	0	0	0	0	0	0	0	0	0	0	0	0	0	0	0	0	0
YCR095W-A	YCR095W-A	159	0	0	0	0	88 FrSh 1 -->T	0	0	0	0	0	0	0	0	0	88 FrSh 1 -->T	0	0	88 FrSh 1 T->-	0	0	0	0	88 FrSh 1 -->T	0	0	0	0	0	0	0	0	0	88 FrSh 1 T->-	88 FrSh 1 T->-	0	0	0	0	0	0	0	0	0	0	88 FrSh 1 -->T	88 FrSh 1 T->-	0
YDL059C	RAD59	717	0	0	0	0	0	0	0	0	616 FrSh 1 -->A	616 FrSh 1 -->A	0	0	0	0	0	0	0	0	0	0	0	0	0	616 FrSh 1 -->A	0	0	616 FrSh 1 -->A	0	0	616 FrSh 1 -->A	0	0	0	0	0	0	616 FrSh 1 -->A	0	0	0	0	0	0	0	0	0	0
YDL080C	THI3	1830	1814 FrSh 1 A->-	1814 FrSh 1 A->-	1814 FrSh 1 A->-	1814 FrSh 1 A->-	1814 FrSh 1 A->-	1814 FrSh 1 A->-	0	1814 FrSh 1 A->-	1814 FrSh 1 A->-	1814 FrSh 1 A->-	1814 FrSh 1 A->-	1814 FrSh 1 A->-	1814 FrSh 1 A->-	1814 FrSh 1 A->-	1814 FrSh 1 A->-	1814 FrSh 1 A->-	1814 FrSh 1 A->-	1814 FrSh 1 A->-	1814 FrSh 1 A->-	1814 FrSh 1 A->-	1814 FrSh 1 A->-	1814 FrSh 1 A->-	1814 FrSh 1 A->-	1814 FrSh 1 A->-	1814 FrSh 1 A->-	1814 FrSh 1 A->-	1814 FrSh 1 A->-	1814 FrSh 1 A->-	1814 FrSh 1 A->-	1814 FrSh 1 A->-	1814 FrSh 1 A->-	1814 FrSh 1 A->-	1814 FrSh 1 A->-	1814 FrSh 1 A->-	1814 FrSh 1 A->-	1814 FrSh 1 A->-	1814 FrSh 1 A->-	1814 FrSh 1 A->-	1814 FrSh 1 A->-	1814 FrSh 1 A->-	0	1814 FrSh 1 A->-	1814 FrSh 1 A->-	1814 FrSh 1 A->-	1814 FrSh 1 A->-	1814 FrSh 1 A->-	1814 FrSh 1 A->-
YDL112W	TRM3	4311	0	0	0	0	0	0	0	0	0	0	0	0	0	0	0	550 FrSh 1 A->-	0	0	0	0	0	0	0	0	0	0	0	0	0	0	0	0	0	0	0	0	0	0	0	0	0	0	0	0	0	0	0
YDL118W	YDL118W	381	0	0	0	369 FrSh 1 T->-	0	0	0	369 FrSh 1 T->-	0	0	369 FrSh 1 T->-	0	0	0	369 FrSh 1 T->-	369 FrSh 1 T->-	369 FrSh 1 T->-	0	0	0	0	0	369 FrSh 1 T->-	0	0	0	0	0	369 FrSh 1 T->-	0	0	0	0	0	0	0	0	0	0	0	369 FrSh 1 T->-	0	369 FrSh 1 T->-	0	369 FrSh 1 T->-	0	0
YDL121C	YDL121C	450	0	0	0	0	0	0	0	0	0	0	0	0	0	0	0	0	0	0	0	0	0	0	0	0	0	0	0	0	0	0	0	0	0	0	0	0	0	0	0	0	0	0	0	0	0	0	99 FrSh 1 A->-
YDL122W	UBP1	2430	0	0	0	0	0	0	0	0	0	0	0	0	0	0	0	0	0	0	0	0	0	0	0	0	0	0	0	0	0	0	0	0	0	0	0	0	0	0	0	0	0	0	0	0	0	2311 Stop 1 C->T	0
YDL124W	YDL124W	939	0	0	0	0	0	0	0	0	0	0	0	0	0	0	0	0	0	0	0	0	0	0	0	0	0	0	0	0	0	0	0	0	0	0	0	0	0	0	0	226 FrSh 1 -->C	0	0	0	0	0	0	0
YDL138W	RGT2	2292	0	0	0	0	0	0	0	0	0	0	0	0	0	0	0	0	0	0	0	0	0	0	0	0	0	0	0	0	0	0	0	0	2244 Stop 1 G->A	0	0	0	0	0	0	0	0	0	0	0	0	0	0
YDL170W	UGA3	1587	0	0	0	0	0	0	0	0	0	0	0	0	0	0	0	0	0	0	0	0	0	0	0	0	0	0	0	0	0	0	0	0	0	0	0	0	0	0	0	0	0	0	0	0	0	0	0
YDL197C	ASF2	1578	0	1517 Stop 1 C->A	0	0	0	0	0	0	0	0	0	0	0	0	0	0	0	0	0	0	0	0	0	0	0	0	0	0	0	0	0	0	0	0	0	0	0	0	0	0	0	0	0	0	0	0	0
YDL199C	YDL199C	2064	0	0	0	0	0	0	0	2032 Stop 1 C->T	0	0	0	0	0	0	0	0	0	0	0	0	0	0	0	0	0	0	0	0	0	0	0	0	0	0	0	0	0	0	0	2032 Stop 1 C->T	0	0	0	0	0	0	0
YDR003W-A	YDR003W-A	123	0	0	0	0	0	0	0	0	0	0	0	0	0	0	0	0	0	0	0	0	0	47 FrSh 1 A->-	0	0	0	0	0	0	0	0	0	0	0	47 FrSh 1 A->-	47 FrSh 1 A->-	0	0	0	0	0	0	0	0	0	0	0	0
YDR009W	GAL3	1563	0	0	0	0	0	0	0	0	0	0	456 Stop 1 C->A	0	0	0	0	0	0	0	0	0	0	0	0	0	0	0	0	0	0	0	0	0	0	0	0	0	0	0	0	0	0	0	456 Stop 1 C->A	0	0	0	0
YDR018C	YDR018C	1191	1184 FrSh 1 A->-	1184 FrSh 1 A->-	1184 FrSh 1 A->-	1184 FrSh 1 A->-	1184 FrSh 1 A->-	1184 FrSh 1 A->-	1184 FrSh 1 A->-	1184 FrSh 1 A->-	1184 FrSh 1 A->-	1184 FrSh 1 A->-	1184 FrSh 2 A->-	1184 FrSh 1 A->-	1184 FrSh 1 A->-	1184 FrSh 1 A->-	1184 FrSh 1 A->-	1184 FrSh 1 A->-	1184 FrSh 1 A->-	1184 FrSh 1 A->-	1184 FrSh 1 A->-	1184 FrSh 1 A->-	1184 FrSh 1 A->-	1184 FrSh 1 A->-	1184 FrSh 1 A->-	1184 FrSh 1 A->-	1184 FrSh 1 A->-	1184 FrSh 1 A->-	1184 FrSh 1 A->-	1184 FrSh 1 A->-	1184 FrSh 1 A->-	1184 FrSh 1 A->-	1184 FrSh 1 A->-	1184 FrSh 1 A->-	1184 FrSh 1 A->-	1184 FrSh 1 A->-	1184 FrSh 1 A->-	1184 FrSh 1 A->-	1184 FrSh 1 A->-	1184 FrSh 1 A->-	1184 FrSh 1 A->-	1184 FrSh 1 A->-	1184 FrSh 1 A->-	1184 FrSh 1 A->-	1184 FrSh 2 A->-	1184 FrSh 1 A->-	1184 FrSh 1 A->-	1184 FrSh 1 A->-	1184 FrSh 1 A->-
YDR030C	RAD28	1521	0	0	0	0	0	0	0	0	0	0	0	0	0	0	0	0	0	0	0	0	0	0	0	0	0	0	0	0	0	0	0	0	0	0	0	0	0	0	0	0	0	0	0	0	0	0	0
YDR055W	PST1	1335	1278 FrSh 1 T->-	0	0	0	0	0	0	0	0	0	0	0	1278 FrSh 1 T->-	0	0	0	0	0	0	0	0	0	1156 FrSh 1 G->-	0	0	0	0	0	0	0	0	0	0	0	0	0	0	0	0	0	0	0	0	0	0	0	0
YDR066C	RTR2	591	0	0	0	0	0	0	0	0	0	0	0	0	0	0	0	0	0	0	0	0	0	0	0	0	0	0	0	0	0	0	0	0	0	0	0	0	0	0	0	0	0	0	0	0	0	0	0
YDR072C	IPT1	1584	0	0	0	0	0	0	0	0	0	0	0	0	0	0	0	0	0	0	0	0	0	0	0	0	0	0	0	0	0	0	0	0	0	0	0	0	0	0	0	0	0	0	0	0	0	0	0
YDR093W	DNF2	4839	0	0	0	0	0	0	0	0	0	0	0	0	0	0	0	0	0	0	0	0	0	0	0	0	0	0	0	0	0	0	0	0	0	0	0	0	0	0	0	0	0	0	0	0	0	0	0
YDR107C	TMN2	2019	0	0	0	0	0	0	0	0	0	0	0	0	0	0	0	0	0	0	0	0	0	0	0	0	0	0	0	0	0	0	0	0	0	0	0	0	1689 Stop 1 T->A	0	0	0	0	0	0	0	0	0	0
YDR109C	YDR109C	2148	0	0	0	0	0	0	0	0	0	0	0	0	806 FrSh 1 -->A	0	0	0	0	0	0	0	0	0	0	0	0	0	0	0	0	0	0	0	0	0	0	0	0	0	0	0	0	0	0	0	0	0	0
YDR111C	ALT2	1524	0	0	0	0	0	0	0	0	0	0	0	0	0	0	0	0	0	0	0	0	0	0	0	0	0	0	0	0	0	0	0	0	0	0	0	0	0	0	0	0	0	0	0	0	0	0	0
YDR114C	YDR114C	303	254 FrSh 2 -->T	288 Stop 1 C->A	0	0	288 Stop 1 C->A	0	0	0	0	254 FrSh 2 -->T	133 Stop 1 C->T	0	254 FrSh 2 -->T	0	0	0	254 FrSh 2 -->T	254 FrSh 2 -->T	254 FrSh 2 -->T	254 FrSh 2 -->T	0	0	0	254 FrSh 8 -->T	254 FrSh 2 -->T	254 FrSh 2 -->T	0	254 FrSh 2 -->T	0	0	288 Stop 1 C->A	288 Stop 1 C->A	0	0	254 FrSh 8 -->T	0	254 FrSh 2 -->T	254 FrSh 2 -->T	109 FrSh 1 A->-	0	254 FrSh 2 T->-	0	133 Stop 1 C->T	0	0	0	0
YDR119W	VBA4	2307	0	2277 Stop 1 T->A	0	0	2277 Stop 1 T->A	2277 Stop 1 T->A	2277 Stop 1 T->A	0	0	0	2277 Stop 1 T->A	0	0	2277 Stop 1 T->A	0	0	0	2277 Stop 1 T->A	0	0	2277 Stop 1 T->A	0	2277 Stop 1 T->A	2277 Stop 1 T->A	0	0	0	0	0	0	2277 Stop 1 T->A	2277 Stop 1 T->A	2277 Stop 1 T->A	2277 Stop 1 T->A	2277 Stop 1 T->A	2277 Stop 1 T->A	0	0	2277 Stop 1 T->A	2277 Stop 1 T->A	0	2277 Stop 1 T->A	2277 Stop 1 T->A	2277 Stop 1 T->A	2277 Stop 1 T->A	2277 Stop 1 T->A	0
YDR121W	DPB4	591	0	0	0	0	0	0	0	0	0	0	0	0	0	0	0	0	0	0	0	0	0	0	0	0	0	0	0	0	0	0	0	0	0	0	0	0	0	0	0	0	0	0	0	0	0	0	0
YDR125C	ECM18	1362	0	0	0	0	0	0	0	0	0	0	0	0	0	0	0	0	0	0	0	0	0	0	67 FrSh 2 A->-	0	0	0	0	0	0	0	0	0	0	52 FrSh 1 A->-	0	0	0	0	0	0	0	0	0	0	0	0	0
YDR144C	MKC7	1791	818 Stop 1 C->A	0	0	0	0	0	0	1497 Stop 1 G->A	0	0	0	0	818 Stop 1 C->A	0	0	0	0	0	0	0	0	0	0	0	0	0	0	0	0	0	0	0	0	0	0	0	0	0	0	0	0	0	0	0	0	0	0
YDR152W	GIR2	798	0	0	0	0	0	0	0	0	0	0	0	0	0	0	0	0	0	0	0	0	0	0	0	0	0	0	0	0	0	0	0	0	793 Stop 1 C->T	0	0	0	0	0	0	793 Stop 1 C->T	0	0	0	0	0	0	0
YDR168W	CDC37	1521	0	0	0	0	0	0	0	0	0	1450 FrSh 1 T->-	0	0	0	0	0	0	0	0	0	0	0	0	0	0	0	0	0	0	0	0	0	0	0	0	0	0	0	0	0	0	0	0	0	0	0	0	0
YDR169C-A	YDR169C-A	150	120 FrSh 1 -->C	120 FrSh 1 -->C	120 FrSh 1 -->C	120 FrSh 1 -->C	120 FrSh 1 -->C	120 FrSh 1 -->C	120 FrSh 1 -->C	120 FrSh 1 -->C	120 FrSh 1 -->C	120 FrSh 1 -->C	120 FrSh 1 -->C	120 FrSh 1 -->C	120 FrSh 1 -->C	120 FrSh 1 -->C	120 FrSh 1 -->C	120 FrSh 1 -->C	0	120 FrSh 1 -->C	120 FrSh 1 -->C	120 FrSh 1 -->C	120 FrSh 1 -->C	120 FrSh 1 -->C	120 FrSh 1 -->C	120 FrSh 1 -->C	120 FrSh 1 -->C	120 FrSh 1 -->C	120 FrSh 1 -->C	120 FrSh 1 -->C	120 FrSh 1 -->C	120 FrSh 1 -->C	120 FrSh 1 -->C	120 FrSh 1 -->C	120 FrSh 1 -->C	120 FrSh 1 -->C	120 FrSh 1 -->C	120 FrSh 1 -->C	120 FrSh 1 -->C	120 FrSh 1 -->C	120 FrSh 1 -->C	120 FrSh 1 -->C	120 FrSh 1 -->C	120 FrSh 1 -->C	120 FrSh 1 -->C	120 FrSh 1 -->C	120 FrSh 1 -->C	120 FrSh 1 -->C	120 FrSh 1 -->C
YDR181C	SAS4	1446	0	0	0	0	0	0	0	1337 Stop 1 T->G	0	0	0	1439 FrSh 1 -->A	0	0	0	0	0	0	0	0	0	0	0	0	0	0	0	0	0	0	0	0	0	0	0	0	0	0	0	0	0	0	0	0	0	0	0
YDR182W-A	YDR182W-A	204	0	0	0	0	0	0	0	0	0	0	0	0	0	0	0	0	0	0	0	0	0	0	0	0	0	0	157 Stop 1 G->T	0	0	0	0	0	0	0	0	0	0	0	0	160 FrSh 1 C->-	0	0	0	0	0	0	0
YDR194W-A	YDR194W-A	153	0	0	0	0	76 Stop 1 C->T	76 Stop 1 C->T	76 Stop 1 C->T	112 Stop 1 C->T	0	0	0	0	0	0	0	0	0	0	0	0	0	0	76 Stop 1 C->T	0	0	0	0	0	0	0	0	0	112 Stop 1 C->T	0	0	0	0	0	0	0	0	0	0	76 Stop 1 C->T	76 Stop 1 C->T	0	0
YDR198C	RKM2	1440	0	0	0	0	0	1436 Stop 1 C->A	1436 Stop 1 C->A	0	0	0	0	0	0	0	0	350 Stop 1 T->A	0	0	0	0	0	0	0	0	0	1436 Stop 1 C->A	0	0	0	0	0	0	0	0	0	0	0	0	0	0	0	0	0	0	1436 Stop 1 C->A	1436 Stop 1 C->A	0
YDR204W	COQ4	1008	0	0	0	0	0	0	0	0	0	0	0	0	0	0	0	0	0	0	0	0	0	0	0	0	0	0	0	0	0	0	0	0	0	988 Stop 1 C->T	0	0	0	0	0	0	0	0	0	0	0	0	0
YDR218C	SPR28	1272	0	0	0	0	0	0	0	0	0	0	0	0	0	0	0	1171 FrSh 11 C->-	0	0	0	0	0	0	0	0	0	0	1193 FrSh 1 -->A	0	0	0	0	0	0	0	0	0	0	0	0	0	0	0	0	0	0	0	0
YDR223W	CRF1	1404	0	0	0	0	477 Stop 1 C->G	0	0	0	0	0	0	469 Stop 1 C->T	254 FrSh 1 A->-	0	256 FrSh 1 T->-	0	0	0	0	0	0	0	0	267 Stop 1 T->A	477 Stop 1 C->G	469 Stop 1 C->T	0	0	0	0	0	0	0	0	267 Stop 1 T->A	0	0	0	0	0	0	0	0	0	0	0	0
YDR229W	IVY1	1362	0	0	0	0	0	0	0	0	0	0	0	0	0	0	0	0	0	0	0	0	0	0	0	0	0	0	0	0	0	0	0	0	0	0	0	0	0	0	0	0	0	0	0	0	0	0	0
YDR246W-A	YDR246W-A	201	0	0	0	0	0	0	0	0	0	0	183 FrSh 1 T->-	0	0	0	0	0	0	0	0	0	0	0	0	0	0	0	0	0	0	0	0	0	0	0	0	0	0	0	0	0	0	0	183 FrSh 1 T->-	0	0	0	0
YDR246W	TRS23	660	0	0	0	0	0	0	0	0	0	0	0	0	0	0	0	0	0	0	0	0	0	0	0	0	0	0	0	0	0	0	0	0	0	0	0	0	0	0	0	0	0	0	0	0	0	0	640 FrSh 1 -->A
YDR247W	VHS1	1386	0	0	0	0	0	0	0	0	0	0	0	0	0	0	0	0	0	0	0	0	0	0	0	0	0	0	0	0	0	0	0	0	0	0	0	0	0	0	0	0	0	0	0	0	0	0	0
YDR248C	YDR248C	582	0	0	0	0	0	0	0	0	0	0	0	0	0	0	0	0	0	0	0	0	0	0	0	0	0	0	0	0	0	0	0	0	0	0	0	0	0	0	0	0	0	0	0	0	0	0	0
YDR258C	HSP78	2436	0	0	0	0	0	0	0	0	0	0	0	0	0	0	0	0	0	0	0	0	0	0	0	0	0	0	1961 Stop 1 C->G	0	0	0	0	0	0	0	0	0	0	0	0	0	0	0	0	0	0	0	0
YDR261C	EXG2	1689	375 FrSh 2 T->-	0	0	0	0	0	0	0	0	0	0	0	375 FrSh 2 T->-	0	0	0	0	0	0	0	0	0	0	0	0	0	0	0	0	0	0	0	0	0	0	0	0	0	0	0	0	0	0	0	0	0	0
YDR270W	CCC2	3015	0	0	0	0	0	0	0	0	0	0	3011 Stop 1 T->A	0	0	0	0	0	0	0	0	0	0	0	0	0	0	0	0	0	0	0	0	0	0	0	0	0	0	0	0	0	0	0	3011 Stop 1 T->A	0	0	0	0
YDR279W	RNH202	1053	0	0	0	0	0	0	0	0	0	0	0	0	0	0	982 FrSh 1 -->A	0	0	0	0	0	0	0	0	0	0	0	0	0	0	0	0	0	0	0	0	0	0	0	0	0	0	0	0	0	0	0	0
YDR325W	YCG1	3108	0	0	0	0	0	0	0	0	0	0	0	0	0	0	0	0	0	0	0	0	0	0	0	0	0	0	0	0	0	0	0	0	0	0	0	0	0	0	0	0	0	0	0	0	0	0	0
YDR330W	UBX5	1503	0	0	0	0	0	0	0	0	0	0	0	0	0	0	0	0	0	0	0	0	0	0	0	0	0	0	0	0	0	0	0	0	0	0	0	0	0	0	0	0	0	0	0	0	0	0	0
YDR336W	YDR336W	945	367 FrSh 5 G->-	0	0	0	0	0	0	0	0	0	0	0	0	0	0	0	0	0	0	0	0	0	0	0	0	0	0	0	0	0	0	0	0	0	0	0	0	0	0	0	0	0	0	0	0	0	0
YDR338C	YDR338C	2088	0	0	0	1092 FrSh 1 -->T	0	0	0	0	0	0	0	0	0	0	0	0	0	0	0	0	0	0	0	0	0	0	0	0	0	0	0	0	0	0	0	0	0	0	0	0	0	0	0	0	0	0	0
YDR348C	YDR348C	1500	1495 Stop 1 C->T	0	0	0	0	0	0	0	0	0	0	0	1495 Stop 1 C->T	0	0	0	0	0	0	0	0	0	0	0	0	0	0	0	0	0	0	0	0	0	0	0	0	0	0	0	0	0	0	0	0	0	0
YDR374C	YDR374C	921	0	0	0	0	0	0	0	0	0	0	0	0	0	0	0	0	0	0	0	0	0	0	0	0	0	0	0	0	0	0	0	0	0	0	0	0	0	0	0	0	0	0	0	0	0	0	0
YDR379W	RGA2	3030	0	0	0	0	0	0	0	0	0	0	3022 FrSh 1 C->-	0	0	0	0	0	0	0	0	0	0	0	0	0	0	0	0	0	0	0	0	0	0	0	0	0	0	0	0	0	0	0	3022 FrSh 1 C->-	0	0	0	0
YDR387C	YDR387C	1668	0	0	0	0	0	0	0	0	0	0	0	0	0	0	0	0	0	0	0	0	0	0	0	0	0	0	0	0	0	0	1151 FrSh 1 -->A	0	0	0	0	0	0	0	0	0	0	0	0	0	0	0	0
YDR423C	CAD1	1230	0	0	0	0	0	0	0	0	0	0	0	0	0	0	0	0	0	0	0	0	0	0	0	0	0	0	0	0	0	0	0	0	0	0	0	0	0	0	0	0	0	0	0	0	0	558 FrSh 10 C->-	0
YDR441C	APT2	546	0	0	0	0	95 FrSh 1 -->T	0	0	0	0	0	0	0	0	0	0	0	0	0	0	0	0	0	0	0	0	0	0	0	0	0	0	0	0	0	0	0	0	0	0	0	0	0	0	0	0	0	0
YDR453C	TSA2	591	0	0	0	0	0	0	0	0	0	0	0	0	0	0	0	0	0	0	0	0	0	0	0	0	0	125 Stop 1 T->A	0	0	0	0	0	0	0	0	0	0	0	0	0	0	0	0	0	0	0	0	0
YDR456W	NHX1	1902	0	0	0	0	0	0	0	0	0	0	0	0	0	0	0	0	0	0	0	0	0	0	0	0	0	0	0	0	0	0	0	0	0	0	0	0	0	0	0	0	0	0	0	0	0	0	0
YDR490C	PKH1	2301	0	2099 FrSh 1 -->A	0	0	0	0	0	0	0	0	0	0	0	0	0	0	0	0	0	0	0	0	0	0	0	0	0	0	0	0	0	0	0	0	0	0	0	0	0	0	0	0	0	0	0	0	0
YDR501W	PLM2	1566	0	0	0	0	0	0	0	0	0	0	0	0	0	0	0	0	0	0	0	0	0	0	0	0	0	0	0	0	0	0	0	0	0	0	0	0	0	0	0	0	0	0	0	0	0	0	0
YDR504C	SPG3	384	0	0	0	0	0	0	0	139 FrSh 1 -->T	0	0	246 FrSh 1 T->-	112 FrSh 10 T->-	69 FrSh 1 -->T	0	0	0	0	0	0	0	0	0	139 FrSh 1 T->-	0	0	0	0	0	139 FrSh 1 -->T	0	0	0	112 FrSh 10 T->-	0	0	0	0	0	200 Stop 1 G->A	0	0	0	246 FrSh 1 T->-	0	0	139 FrSh 1 -->T	0
YDR512C	EMI1	564	280 Stop 1 C->T	280 Stop 1 C->T	280 Stop 1 C->T	280 Stop 1 C->T	280 Stop 1 C->T	280 Stop 1 C->T	280 Stop 1 C->T	0	280 Stop 1 C->T	280 Stop 1 C->T	280 Stop 1 C->T	280 Stop 1 C->T	280 Stop 1 C->T	280 Stop 1 C->T	280 Stop 1 C->T	280 Stop 1 C->T	0	280 Stop 1 C->T	280 Stop 1 C->T	280 Stop 1 C->T	280 Stop 1 C->T	280 Stop 1 C->T	280 Stop 1 C->T	280 Stop 1 C->T	280 Stop 1 C->T	0	280 Stop 1 C->T	280 Stop 1 C->T	0	280 Stop 1 C->T	0	0	280 Stop 1 C->T	280 Stop 1 C->T	280 Stop 1 C->T	280 Stop 1 C->T	280 Stop 1 C->T	280 Stop 1 C->T	280 Stop 1 C->T	0	0	280 Stop 1 C->T	280 Stop 1 C->T	280 Stop 1 C->T	280 Stop 1 C->T	280 Stop 1 C->T	280 Stop 1 C->T
YDR520C	URC2	2319	0	0	0	0	0	0	0	0	0	0	0	0	0	0	0	0	0	0	0	0	0	0	0	0	0	2305 Stop 1 G->T	0	0	0	0	0	0	0	0	0	0	0	0	0	0	0	0	0	0	0	0	0
YDR522C	SPS2	1509	11 Stop 1 G->A	0	0	87 FrSh 1 A->-	0	0	0	0	0	0	0	0	11 Stop 1 G->A	0	0	40 FrSh 1 T->-	0	0	0	0	87 FrSh 1 A->-	0	0	0	0	0	0	0	0	0	0	0	0	0	0	0	0	0	0	0	0	0	0	87 FrSh 1 A->-	0	0	0
YDR538W	PAD1	729	0	0	0	0	0	0	0	0	0	0	294 Stop 1 T->G	0	0	0	0	0	0	0	0	0	0	0	0	0	0	0	0	0	0	0	0	0	0	0	0	0	0	0	0	0	0	0	294 Stop 1 T->G	0	0	0	0
YDR539W	FDC1	1512	0	0	0	0	0	0	0	0	0	0	864 FrSh 1 A->-	0	0	0	0	0	0	0	0	0	0	0	0	0	0	341 FrSh 1 C->-	0	0	0	0	0	0	0	0	0	0	0	0	0	0	0	0	864 FrSh 1 A->-	0	0	0	0
YDR541C	YDR541C	1035	323 FrSh 1 -->A	0	0	0	0	0	0	0	0	0	0	0	323 FrSh 1 -->A	0	0	0	0	0	0	0	0	0	0	0	0	0	0	0	0	0	0	0	0	0	0	0	0	0	0	0	0	0	0	0	0	0	0
YEL020W-A	TIM9	264	0	0	0	0	0	0	0	0	0	0	0	0	247 Stop 1 C->T	0	0	0	0	0	0	0	0	0	0	0	0	0	0	0	0	0	0	0	0	0	0	0	0	0	0	0	0	0	0	0	0	0	0
YEL023C	YEL023C	2049	0	0	0	0	0	0	0	0	0	0	0	0	0	0	0	0	41 FrSh 1 -->A	0	0	0	0	0	0	0	0	0	0	0	0	0	0	0	0	0	0	0	0	0	0	0	0	0	0	0	0	0	0
YEL025C	YEL025C	3567	0	0	0	0	0	0	0	0	0	0	0	0	0	0	0	0	0	0	0	0	0	0	0	0	0	0	0	2131 Stop 1 C->T	0	0	0	0	0	0	0	0	0	0	0	0	0	0	0	0	0	0	0
YEL030W	ECM10	1935	0	0	0	0	0	0	0	0	0	0	0	0	0	0	0	0	0	0	0	0	0	0	0	0	0	0	0	0	0	0	0	0	1400 Stop 1 T->A	0	0	0	0	0	0	0	0	0	0	0	0	0	0
YEL040W	UTR2	1404	0	0	0	0	0	0	0	0	0	0	0	0	0	0	0	0	0	0	0	0	0	0	0	0	0	0	0	0	0	0	0	0	0	0	0	0	0	0	0	0	0	0	0	0	0	0	0
YEL055C	POL5	3069	0	0	0	0	0	0	0	0	0	0	0	0	0	0	0	0	0	0	0	0	0	0	0	0	0	0	0	0	0	0	0	0	0	0	0	0	0	0	0	0	0	0	0	0	0	0	0
YEL066W	HPA3	540	28 FrSh 1 C->-	0	0	0	0	0	0	0	0	0	0	0	28 FrSh 1 C->-	0	0	0	0	0	0	0	0	0	0	0	0	0	0	0	0	0	0	0	0	0	0	0	0	0	0	0	0	0	0	0	0	0	0
YEL067C	YEL067C	588	325 Stop 1 G->T	0	464 Stop 1 C->A	464 Stop 1 C->A	0	464 Stop 1 C->A	464 Stop 1 C->A	0	464 Stop 1 C->A	464 Stop 1 C->A	464 Stop 1 C->A	464 Stop 1 C->A	325 Stop 1 G->T	464 Stop 1 C->A	464 Stop 1 C->A	0	0	464 Stop 1 C->A	464 Stop 1 C->A	464 Stop 1 C->A	464 Stop 1 C->A	464 Stop 1 C->A	464 Stop 1 C->A	0	464 Stop 1 C->A	0	0	464 Stop 1 C->A	464 Stop 1 C->A	464 Stop 1 C->A	0	0	464 Stop 1 C->A	464 Stop 1 C->A	464 Stop 1 C->A	464 Stop 1 C->A	464 Stop 1 C->A	464 Stop 1 C->A	464 Stop 1 C->A	0	0	464 Stop 1 C->A	464 Stop 1 C->A	464 Stop 1 C->A	464 Stop 1 C->A	464 Stop 1 C->A	464 Stop 1 C->A
YER001W	MNN1	2289	484 Stop 1 G->T	0	0	0	0	0	0	0	0	0	0	0	484 Stop 1 G->T	0	0	0	0	0	0	0	0	0	0	0	0	0	0	0	0	0	0	0	0	0	0	0	0	0	0	0	0	0	0	0	0	0	0
YER028C	MIG3	1185	0	0	0	0	0	107 FrSh 1 G->-	107 FrSh 1 G->-	0	0	0	0	0	0	0	0	0	0	0	0	0	0	0	0	0	0	0	0	0	0	0	148 Stop 1 C->T	148 Stop 1 C->T	0	0	0	0	0	0	0	100 FrSh 1 -->A	0	0	0	0	0	0	0
YER039C	HVG1	750	0	0	0	0	0	179 Stop 1 G->A	179 Stop 1 G->A	179 Stop 1 G->A	0	0	263 Stop 1 T->A	0	0	0	0	0	0	179 Stop 1 G->A	0	0	0	0	0	179 Stop 1 G->A	0	0	0	0	0	0	0	0	0	0	0	0	0	0	0	0	0	0	263 Stop 1 T->A	0	0	0	0
YER041W	YEN1	2280	0	0	0	0	0	0	0	0	0	0	0	0	0	0	0	0	0	0	0	0	0	0	0	0	0	0	0	0	0	0	0	0	0	0	0	0	0	0	2081 FrSh 1 C->-	0	0	0	0	0	0	0	0
YER049W	TPA1	1935	0	0	0	0	0	0	0	0	0	0	0	0	0	0	0	0	0	0	0	0	0	0	0	0	0	0	0	0	0	0	0	0	0	0	0	0	0	0	0	0	285 FrSh 1 C->-	0	0	0	0	0	0
YER075C	PTP3	2787	0	0	0	0	0	0	0	0	0	0	0	0	0	0	0	0	0	0	0	0	0	0	0	0	0	0	0	0	0	0	0	0	0	0	0	0	0	0	0	0	0	0	0	1315 Stop 1 A->T	0	0	0
YER076C	YER076C	909	0	0	0	0	0	0	0	0	0	0	0	0	0	0	0	0	0	0	34 FrSh 1 T->-	0	0	0	0	0	0	0	0	0	0	0	0	0	34 FrSh 1 T->-	0	185 Stop 1 T->A	0	0	0	0	0	0	0	0	0	0	0	0
YER089C	PTC2	1395	1283 FrSh 4 -->C	0	0	0	0	0	0	0	0	0	0	0	1283 FrSh 4 -->C	0	0	0	0	0	1283 FrSh 4 -->C	0	0	0	0	0	0	0	0	0	0	1283 FrSh 4 -->C	0	0	0	0	0	0	0	0	0	0	0	0	0	0	0	0	0
YER098W	UBP9	2265	0	0	0	0	0	0	0	0	0	0	0	0	0	0	0	0	0	0	0	0	0	0	0	0	0	0	0	0	0	0	0	0	0	0	0	0	0	0	0	0	0	0	0	0	0	0	0
YER101C	AST2	1293	0	0	0	838 FrSh 1 G->-	0	0	0	0	0	0	0	0	0	0	838 FrSh 1 G->-	0	0	0	0	0	0	0	0	0	0	0	0	0	0	0	0	0	0	0	0	0	0	0	0	0	0	0	0	0	0	0	0
YER114C	BOI2	3123	0	0	0	0	0	3111 FrSh 1 C->-	3111 FrSh 1 C->-	0	0	0	0	0	0	0	0	0	3111 FrSh 1 C->-	0	0	0	0	0	0	3111 FrSh 1 C->-	0	0	0	3111 FrSh 1 C->-	0	0	0	0	3102 FrSh 1 A->-	0	0	0	0	0	0	0	0	0	0	0	3056 FrSh 1 A->-	0	0
YER129W	SAK1	3429	0	0	0	0	0	0	0	0	0	0	0	0	0	0	0	0	0	0	0	0	0	0	0	0	0	0	0	0	0	0	0	0	0	0	0	0	0	0	0	0	0	0	0	0	0	0	0
YER132C	PMD1	5262	0	0	0	0	0	0	0	0	0	0	0	0	0	0	0	0	0	0	0	0	0	0	0	0	0	0	0	0	0	0	4666 Stop 1 A->T	0	0	0	0	0	0	0	0	0	0	0	0	0	0	0	0
YER141W	COX15	1461	0	0	0	0	0	0	0	0	0	0	0	0	0	0	0	0	0	0	0	0	0	0	0	0	0	0	0	0	0	0	0	0	0	0	0	0	0	0	0	0	0	0	0	0	0	0	0
YER170W	ADK2	678	667 FrSh 1 -->C	667 FrSh 1 -->C	667 FrSh 1 -->C	667 FrSh 1 -->C	667 FrSh 1 -->C	667 FrSh 1 -->C	667 FrSh 1 -->C	667 FrSh 1 -->C	667 FrSh 1 -->C	667 FrSh 1 -->C	667 FrSh 1 -->C	667 FrSh 1 -->C	665 FrSh 1 -->T	667 FrSh 1 -->C	667 FrSh 1 -->C	667 FrSh 1 -->C	667 FrSh 1 -->C	667 FrSh 1 -->C	667 FrSh 1 -->C	667 FrSh 1 -->C	667 FrSh 1 -->C	667 FrSh 1 -->C	667 FrSh 1 -->C	667 FrSh 1 -->C	667 FrSh 1 -->C	667 FrSh 1 -->C	667 FrSh 1 -->C	667 FrSh 1 -->C	667 FrSh 1 -->C	667 FrSh 1 -->C	667 FrSh 1 -->C	667 FrSh 1 -->C	665 FrSh 1 -->T	667 FrSh 1 -->C	667 FrSh 1 -->C	667 FrSh 1 -->C	667 FrSh 1 -->C	667 FrSh 1 -->C	665 FrSh 1 -->T	667 FrSh 1 -->C	667 FrSh 1 -->C	667 FrSh 1 -->C	667 FrSh 1 -->C	667 FrSh 1 -->C	667 FrSh 1 -->C	667 FrSh 1 -->C	667 FrSh 1 -->C
YER184C	YER184C	2385	0	0	0	0	0	0	0	0	0	0	0	0	0	0	0	0	0	0	0	0	0	0	0	0	0	0	0	0	0	0	0	0	0	0	0	0	0	0	0	0	0	0	0	0	0	0	0
YER185W	PUG1	912	0	0	0	0	0	0	0	0	0	0	0	0	0	0	0	0	0	0	0	0	0	0	0	0	0	0	0	0	0	0	0	0	0	0	0	0	0	0	0	0	0	0	0	0	0	0	0
YER186C	YER186C	921	65 FrSh 1 A->-	0	174 FrSh 1 A->-	174 FrSh 1 A->-	174 FrSh 1 A->-	174 FrSh 1 A->-	174 FrSh 1 A->-	0	174 FrSh 1 A->-	174 FrSh 1 A->-	906 Stop 1 G->A	174 FrSh 1 A->-	65 FrSh 1 A->-	0	174 FrSh 1 A->-	0	174 FrSh 1 A->-	174 FrSh 1 A->-	174 FrSh 1 A->-	174 FrSh 1 A->-	0	174 FrSh 1 A->-	25 Stop 1 G->T	0	174 FrSh 1 A->-	65 FrSh 1 A->-	65 FrSh 1 A->-	25 Stop 1 G->T	25 Stop 1 G->T	174 FrSh 1 A->-	0	0	0	0	0	0	174 FrSh 1 A->-	174 FrSh 1 A->-	0	0	174 FrSh 1 A->-	0	906 Stop 1 G->A	0	174 FrSh 1 A->-	0	65 FrSh 1 A->-
YFL026W	STE2	1296	0	0	0	0	0	0	0	0	0	0	0	0	0	0	0	0	0	0	1163 FrSh 1 A->-	0	0	0	0	0	0	0	0	0	0	0	0	0	0	0	0	0	0	0	0	0	0	0	0	0	0	0	0
YFL027C	GYP8	1494	0	0	0	0	0	0	0	0	0	0	0	0	0	0	0	0	0	0	0	0	0	0	0	0	0	0	0	0	0	0	0	0	0	0	0	0	0	0	0	0	0	0	0	0	0	0	0
YFL041W-A	YFL041W-A	192	0	0	0	0	0	0	0	0	0	0	0	0	0	0	0	0	0	0	0	0	0	0	0	0	0	134 Stop 1 T->A	0	0	0	0	0	0	0	134 Stop 1 T->A	0	0	0	0	77 FrSh 1 G->-	0	0	0	0	0	134 Stop 1 T->A	0	0
YFR018C	YFR018C	1092	0	0	0	0	0	0	0	0	0	0	0	0	0	0	0	0	867 FrSh 1 C->-	0	0	0	0	0	0	0	0	0	0	0	0	0	0	0	0	0	0	0	0	0	0	0	0	0	0	0	0	0	0
YFR022W	ROG3	2202	0	0	0	0	0	0	0	0	0	0	0	0	0	0	0	0	0	0	0	0	0	0	0	0	0	0	0	0	0	0	0	0	0	0	0	0	0	0	0	0	0	0	0	0	0	0	0
YFR025C	HIS2	1008	0	0	0	0	0	0	0	0	0	0	0	0	0	0	0	0	0	432 Stop 1 G->A	0	0	0	0	0	0	0	0	0	0	0	0	0	0	0	0	0	0	0	0	0	0	0	0	0	0	0	0	0
YFR026C	ULI1	510	312 FrSh 1 -->G	312 FrSh 2 -->G	312 FrSh 1 -->G	0	312 FrSh 1 -->G	312 FrSh 1 -->G	312 FrSh 1 -->G	0	312 FrSh 1 -->G	312 FrSh 2 -->G	0	312 FrSh 1 -->G	312 FrSh 1 -->G	0	0	0	312 FrSh 2 -->G	0	312 FrSh 1 -->G	312 FrSh 2 -->G	0	312 FrSh 1 -->G	0	312 FrSh 2 -->G	312 FrSh 1 -->G	312 FrSh 1 -->G	312 FrSh 2 -->G	312 FrSh 2 -->G	312 FrSh 1 -->G	312 FrSh 2 -->G	0	0	0	395 FrSh 1 A->-	0	0	312 FrSh 2 -->G	0	0	0	312 FrSh 1 -->G	0	0	0	0	0	312 FrSh 1 -->G
YFR045W	YFR045W	1002	41 FrSh 1 -->C	0	41 FrSh 1 -->C	41 FrSh 1 -->C	0	41 FrSh 1 -->C	41 FrSh 1 -->C	0	41 FrSh 1 -->C	41 FrSh 1 -->C	41 FrSh 1 -->C	41 FrSh 1 -->C	41 FrSh 1 -->C	0	0	0	0	0	41 FrSh 1 -->C	41 FrSh 1 -->C	0	41 FrSh 1 -->C	0	41 FrSh 1 -->C	41 FrSh 1 -->C	41 FrSh 1 -->C	41 FrSh 1 -->C	0	41 FrSh 1 -->C	41 FrSh 1 -->C	0	0	0	0	0	0	41 FrSh 1 -->C	41 FrSh 1 -->C	41 FrSh 1 -->C	41 FrSh 1 -->C	0	0	41 FrSh 1 -->C	0	0	0	41 FrSh 1 -->C
YGL004C	RPN14	1254	0	0	0	0	0	0	0	0	0	0	0	0	0	0	0	0	0	0	0	0	0	0	0	0	0	0	0	0	435 FrSh 1 -->T	0	0	0	0	0	0	0	0	0	0	0	0	0	0	0	0	0	0
YGL021W	ALK1	2283	0	0	0	0	0	0	0	0	0	0	0	0	75 FrSh 1 C->-	0	0	0	0	0	0	0	0	0	0	0	0	0	0	0	1680 FrSh 1 -->G	0	0	0	0	0	0	0	0	0	17 FrSh 1 A->-	0	16 FrSh 1 G->-	0	0	0	0	0	0
YGL067W	NPY1	1155	0	0	0	0	0	0	0	0	0	0	0	0	0	0	0	0	0	0	0	0	0	0	0	0	0	0	0	0	0	0	733 FrSh 1 A->-	0	0	0	0	0	0	0	0	0	0	0	0	0	0	0	0
YGL071W	AFT1	2073	0	0	0	0	0	0	0	0	0	0	0	0	0	0	0	0	0	0	0	0	0	0	0	0	0	0	0	0	2059 Stop 1 A->T	0	0	0	0	0	0	0	0	0	0	0	0	0	0	0	0	0	0
YGL080W	FMP37	393	0	0	0	0	0	0	0	379 FrSh 1 -->A	0	0	0	0	0	0	0	0	0	0	0	0	0	0	0	0	0	0	0	0	0	0	0	0	0	0	0	0	0	0	0	0	0	0	0	0	0	0	0
YGL086W	MAD1	2250	0	979 FrSh 1 G->-	979 FrSh 1 G->-	979 FrSh 1 G->-	0	979 FrSh 1 G->-	979 FrSh 1 G->-	0	0	979 FrSh 1 G->-	0	0	0	0	0	0	979 FrSh 1 G->-	0	979 FrSh 1 G->-	979 FrSh 1 G->-	22 Stop 1 C->T	979 FrSh 1 G->-	0	0	979 FrSh 1 G->-	0	979 FrSh 1 G->-	0	979 FrSh 1 G->-	979 FrSh 1 G->-	0	0	0	0	0	0	0	0	0	0	0	0	0	979 FrSh 1 G->-	0	0	0
YGL089C	MF(ALPHA)2	363	0	0	0	0	0	0	0	0	0	0	0	0	0	0	0	0	0	0	0	0	0	0	0	0	0	0	0	0	0	0	0	0	0	0	0	0	0	0	0	0	0	0	0	0	0	0	0
YGL096W	TOS8	831	0	310 FrSh 2 T->-	0	0	0	0	0	0	0	0	0	0	0	0	0	0	0	0	0	0	0	0	0	0	0	0	0	310 FrSh 2 T->-	0	0	0	0	0	0	0	0	0	0	0	0	310 FrSh 2 T->-	0	0	0	0	0	0
YGL120C	PRP43	2304	0	0	0	0	0	0	0	0	0	0	0	0	0	0	0	0	0	0	0	0	0	0	0	0	0	0	2245 Stop 1 A->T	0	0	0	0	0	0	0	0	0	0	0	0	0	0	0	0	0	0	0	0
YGL134W	PCL10	1302	0	0	0	0	0	0	0	0	0	0	0	0	0	0	0	0	0	0	0	0	0	0	0	0	0	0	0	0	0	0	0	363 FrSh 1 -->A	0	0	0	0	0	0	0	0	0	0	0	0	0	0	0
YGL157W	ARI1	1044	0	0	0	0	0	507 Stop 1 T->A	507 Stop 1 T->A	0	0	0	0	0	0	0	0	0	0	0	0	0	0	0	0	0	0	0	0	0	0	0	0	0	0	0	0	0	0	0	0	0	0	0	0	0	0	0	0
YGL158W	RCK1	1539	0	0	0	384 FrSh 1 T->-	384 FrSh 1 T->-	0	0	0	0	0	0	0	0	0	0	384 FrSh 1 T->-	0	384 FrSh 1 T->-	0	0	0	0	0	0	0	384 FrSh 1 T->-	384 FrSh 1 T->-	0	384 FrSh 1 T->-	0	0	0	0	0	0	0	0	0	0	0	0	0	0	0	0	0	0
YGL168W	HUR1	333	0	0	0	0	166 Stop 1 A->T	0	0	0	0	0	166 Stop 1 A->T	0	0	0	0	0	0	0	0	0	0	0	0	0	0	0	166 Stop 1 A->T	0	0	0	0	0	0	0	0	0	0	0	166 Stop 1 A->T	0	0	0	166 Stop 1 A->T	0	0	166 Stop 1 A->T	0
YGL179C	TOS3	1683	0	0	0	0	0	0	0	0	0	0	0	0	0	0	0	0	0	0	0	0	0	0	0	0	0	0	0	0	0	0	0	0	0	0	0	0	0	0	1079 FrSh 1 A->-	0	0	0	0	0	0	0	0
YGL192W	IME4	1803	0	0	0	0	0	0	0	0	0	0	0	0	0	0	0	1798 Stop 1 C->T	0	0	0	0	0	0	0	0	0	0	0	0	0	0	0	0	0	0	0	0	0	0	0	0	0	0	0	0	0	0	0
YGL193C	YGL193C	312	190 FrSh 2 A->-	0	190 FrSh 2 A->-	190 FrSh 2 A->-	0	190 FrSh 2 A->-	190 FrSh 2 A->-	0	190 FrSh 2 A->-	190 FrSh 2 A->-	0	190 FrSh 2 A->-	190 FrSh 2 A->-	0	0	0	0	190 FrSh 2 A->-	190 FrSh 2 A->-	190 FrSh 2 A->-	190 FrSh 2 A->-	190 FrSh 2 A->-	0	190 FrSh 2 A->-	190 FrSh 2 A->-	190 FrSh 2 A->-	190 FrSh 2 A->-	190 FrSh 2 A->-	190 FrSh 2 A->-	190 FrSh 2 A->-	0	0	0	0	0	0	190 FrSh 2 A->-	190 FrSh 2 A->-	0	0	190 FrSh 2 A->-	0	0	0	190 FrSh 2 A->-	0	190 FrSh 2 A->-
YGL196W	DSD1	1287	751 FrSh 1 T->-	0	0	0	0	0	0	0	0	0	0	0	0	0	0	0	0	0	0	0	0	0	0	0	0	0	0	0	0	0	0	0	0	0	0	0	0	0	0	0	0	0	0	0	0	0	0
YGL202W	ARO8	1503	0	0	0	0	0	0	0	0	0	0	0	0	0	0	0	0	0	0	0	0	0	0	0	0	0	0	0	0	0	0	0	0	0	0	0	0	0	0	0	0	0	0	0	0	0	0	0
YGL208W	SIP2	1248	0	0	0	0	0	0	0	0	0	0	0	509 Stop 1 G->A	753 FrSh 1 -->A	0	0	0	0	0	0	0	0	0	0	0	0	0	0	0	0	0	0	0	0	0	0	0	0	0	0	0	0	0	0	0	0	0	0
YGL212W	VAM7	951	0	0	0	0	0	0	0	0	21 FrSh 1 -->G	0	0	21 FrSh 1 -->G	0	0	0	0	0	0	21 FrSh 1 -->G	0	0	0	0	0	0	0	0	0	0	0	0	0	0	0	0	0	0	0	0	0	0	0	0	0	0	0	0
YGL220W	FRA2	363	0	0	0	0	0	0	0	0	0	0	0	0	0	0	0	0	75 Stop 1 G->A	0	0	0	0	0	0	0	0	0	0	0	0	0	0	0	0	0	0	0	0	0	0	0	0	0	0	0	0	0	0
YGL228W	SHE10	1734	0	0	0	0	0	0	0	0	0	0	0	0	0	0	0	0	0	0	0	0	0	0	0	0	0	0	0	0	0	0	0	0	0	0	0	0	0	0	0	0	0	0	0	0	0	0	0
YGL229C	SAP4	2457	0	0	0	0	0	0	0	0	0	0	0	0	0	0	0	0	0	0	0	0	0	0	0	0	0	0	0	0	0	0	0	0	0	0	0	0	0	0	0	0	0	0	0	0	0	0	0
YGL235W	YGL235W	537	0	0	0	0	0	0	0	532 FrSh 1 -->G	0	0	0	0	0	0	0	0	0	0	0	0	0	0	0	0	0	0	0	0	0	0	0	0	0	0	0	0	0	0	0	0	0	0	0	0	0	0	0
YGL243W	TAD1	1203	0	0	0	0	0	30 Stop 1 C->A	30 Stop 1 C->A	0	0	0	0	0	0	30 Stop 1 C->A	30 Stop 1 C->A	0	30 Stop 1 C->A	0	0	0	30 Stop 1 C->A	0	0	0	0	0	0	0	30 Stop 1 C->A	0	0	0	0	0	30 Stop 1 C->A	0	0	0	30 Stop 1 C->A	0	0	30 Stop 1 C->A	0	30 Stop 1 C->A	0	0	0
YGL257C	MNT2	1677	0	0	0	0	0	0	0	0	0	0	0	0	0	0	0	0	0	0	0	0	0	0	1209 FrSh 1 G->-	0	0	0	0	0	0	0	0	0	0	0	0	0	0	0	0	0	0	0	0	0	0	0	0
YGR035W-A	YGR035W-A	222	200 FrSh 1 A->-	200 FrSh 1 A->-	200 FrSh 1 A->-	200 FrSh 1 A->-	200 FrSh 1 A->-	0	200 FrSh 1 A->-	200 FrSh 1 A->-	200 FrSh 1 A->-	200 FrSh 1 A->-	0	200 FrSh 1 A->-	200 FrSh 1 A->-	0	200 FrSh 1 A->-	0	200 FrSh 1 A->-	200 FrSh 1 A->-	200 FrSh 1 A->-	200 FrSh 1 A->-	0	200 FrSh 1 A->-	0	200 FrSh 1 A->-	200 FrSh 1 A->-	0	200 FrSh 1 A->-	200 FrSh 1 A->-	0	200 FrSh 1 A->-	0	0	200 FrSh 1 A->-	0	0	0	200 FrSh 1 A->-	200 FrSh 1 A->-	0	23 FrSh 1 T->-	200 FrSh 1 A->-	0	0	0	0	128 FrSh 2 T->-	200 FrSh 1 A->-
YGR044C	RME1	903	0	0	0	0	0	0	0	0	0	0	0	0	407 FrSh 22 -->A	0	0	0	0	0	0	0	0	0	283 Stop 1 C->T	0	0	0	0	0	0	0	0	0	0	0	0	0	0	0	0	0	0	0	0	0	0	0	0
YGR052W	FMP48	1110	0	0	0	0	0	0	0	0	0	0	0	0	0	0	0	997 Stop 1 C->T	0	0	0	0	0	0	0	0	0	0	0	0	0	0	0	0	0	0	997 Stop 1 C->T	0	0	0	0	0	0	0	0	0	0	0	0
YGR066C	YGR066C	879	0	0	0	0	0	0	0	0	0	0	0	0	0	0	0	0	0	0	0	0	0	0	0	0	0	0	0	0	0	0	0	0	0	0	0	0	0	0	0	0	0	0	0	0	0	0	0
YGR067C	YGR067C	2415	0	0	0	0	0	0	0	0	0	0	0	0	0	0	0	0	0	0	0	0	0	0	0	0	0	2303 FrSh 1 T->-	0	0	0	0	0	0	0	0	0	0	0	0	0	0	0	0	0	0	0	0	0
YGR079W	YGR079W	1113	0	952 FrSh 1 A->-	0	0	0	0	0	95 FrSh 4 T->-	0	0	0	95 FrSh 4 T->-	0	0	0	0	0	0	0	0	0	0	0	0	0	0	95 FrSh 4 T->-	0	95 FrSh 4 T->-	0	95 FrSh 4 T->-	95 FrSh 4 T->-	0	0	95 FrSh 4 T->-	0	0	0	0	95 FrSh 4 T->-	0	0	0	0	0	0	0
YGR100W	MDR1	2853	0	0	0	0	0	0	0	0	0	0	0	0	0	0	0	0	0	0	0	0	0	0	0	0	0	0	0	0	0	0	0	0	0	0	0	0	0	0	0	0	0	0	0	0	0	0	0
YGR121W-A	YGR121W-A	216	0	0	0	158 FrSh 1 A->-	158 FrSh 1 A->-	49 FrSh 1 A->-	53 FrSh 10 G->-	158 FrSh 1 A->-	0	0	158 FrSh 1 A->-	0	0	158 FrSh 1 A->-	158 FrSh 1 A->-	0	53 FrSh 10 G->-	0	0	0	0	0	158 FrSh 1 A->-	0	0	0	0	158 FrSh 1 A->-	158 FrSh 1 A->-	0	158 FrSh 1 A->-	158 FrSh 1 A->-	0	158 FrSh 1 A->-	158 FrSh 1 A->-	49 FrSh 1 A->-	0	0	158 FrSh 1 A->-	0	0	158 FrSh 1 A->-	158 FrSh 1 A->-	158 FrSh 1 A->-	158 FrSh 1 A->-	158 FrSh 1 A->-	0
YGR136W	LSB1	726	0	0	0	0	0	0	0	0	0	0	0	0	0	0	0	0	0	0	0	0	0	0	0	0	0	0	0	0	0	0	0	0	0	0	0	0	0	0	0	0	0	0	0	0	0	0	0
YGR140W	CBF2	2871	0	21 FrSh 1 -->T	0	0	0	0	21 FrSh 1 -->T	21 FrSh 1 -->T	0	0	21 FrSh 1 -->T	0	0	21 FrSh 1 -->T	21 FrSh 1 -->T	0	21 FrSh 1 -->T	0	0	0	21 FrSh 1 -->T	0	21 FrSh 1 -->T	21 FrSh 1 -->T	0	0	0	0	21 FrSh 1 -->T	0	21 FrSh 1 -->T	21 FrSh 1 -->T	0	21 FrSh 1 -->T	19 FrSh 1 -->C	21 FrSh 1 -->T	0	0	21 FrSh 1 -->T	21 FrSh 1 -->T	0	21 FrSh 1 -->T	21 FrSh 1 -->T	21 FrSh 1 -->T	21 FrSh 1 -->T	21 FrSh 1 -->T	0
YGR146C-A	YGR146C-A	162	0	104 FrSh 1 -->T	0	104 FrSh 1 -->T	104 FrSh 1 -->T	0	104 FrSh 1 -->T	104 FrSh 1 -->T	104 FrSh 1 -->T	104 FrSh 1 -->T	104 FrSh 1 -->T	0	0	104 FrSh 1 -->T	104 FrSh 1 -->T	104 FrSh 1 -->T	104 FrSh 1 -->T	104 FrSh 1 -->T	104 FrSh 1 -->T	104 FrSh 1 -->T	104 FrSh 1 -->T	0	105 FrSh 1 -->G	0	104 FrSh 1 -->T	0	0	104 FrSh 1 -->T	104 FrSh 1 -->T	104 FrSh 1 -->T	104 FrSh 1 -->T	90 Stop 1 G->A	104 FrSh 1 -->T	104 FrSh 1 -->T	104 FrSh 1 -->T	104 FrSh 1 -->T	104 FrSh 1 -->T	104 FrSh 1 -->T	104 FrSh 1 -->T	104 FrSh 1 -->T	104 FrSh 1 -->T	104 FrSh 1 -->T	104 FrSh 1 -->T	104 FrSh 1 -->T	104 FrSh 1 -->T	104 FrSh 1 -->T	0
YGR154C	GTO1	1071	0	0	0	0	0	0	0	0	0	0	0	0	0	0	0	0	0	0	0	0	123 FrSh 1 G->-	0	0	0	0	0	0	0	0	0	0	0	0	0	0	0	0	0	0	0	0	0	0	123 FrSh 1 G->-	0	0	0
YGR171C	MSM1	1728	0	0	0	0	0	0	0	0	0	0	0	0	0	0	0	0	0	0	0	0	0	0	0	0	0	0	0	0	0	0	0	0	0	0	0	0	0	0	0	0	0	0	0	0	0	1684 FrSh 1 A->-	0
YGR174C	CBP4	513	43 Stop 1 C->T	0	0	0	0	0	0	0	0	0	0	0	43 Stop 1 C->T	0	0	0	0	0	0	0	0	0	0	0	0	0	0	0	0	0	0	0	0	0	0	0	0	0	0	0	0	0	0	0	0	0	0
YGR184C	UBR1	5853	0	0	0	0	0	0	0	0	0	0	0	0	0	0	0	0	0	0	0	0	0	0	0	0	0	0	0	0	0	0	0	0	0	0	0	0	0	0	0	0	0	0	0	0	0	0	0
YGR197C	SNG1	1644	0	720 FrSh 1 -->T	0	0	0	0	0	0	0	0	0	0	0	0	0	0	0	0	0	0	0	1208 FrSh 1 C->-	0	0	0	0	0	0	720 FrSh 1 -->T	0	0	0	0	0	0	0	0	0	0	0	0	0	0	0	0	0	0
YGR212W	SLI1	1407	0	0	0	0	0	0	0	0	0	0	0	0	0	0	0	0	0	0	0	0	0	0	0	0	0	0	0	0	0	0	0	0	0	0	0	0	0	0	0	0	0	0	0	0	0	557 Stop 1 G->A	0
YGR213C	RTA1	954	0	0	0	0	0	0	0	0	0	0	27 Stop 1 T->A	0	0	0	0	0	0	0	0	0	0	0	0	0	0	0	0	0	0	0	0	0	0	0	0	0	0	0	0	0	0	0	27 Stop 1 T->A	0	0	0	0
YGR221C	TOS2	1869	0	0	0	0	0	0	0	0	0	0	0	0	0	0	0	0	0	0	0	0	0	0	0	0	0	0	0	0	0	0	0	0	0	0	0	0	0	0	0	0	0	0	0	0	0	1851 Stop 1 C->G	0
YGR224W	AZR1	1842	0	0	707 FrSh 1 T->-	0	0	0	0	0	707 FrSh 1 T->-	0	0	0	0	0	0	0	0	0	0	0	0	707 FrSh 1 T->-	0	0	0	0	0	0	0	0	0	0	0	0	0	0	0	0	0	0	0	0	0	0	0	0	707 FrSh 1 T->-
YGR235C	YGR235C	702	0	0	0	0	0	0	0	0	0	0	0	0	0	0	0	0	0	0	0	0	0	0	0	0	0	0	0	0	0	0	0	0	0	0	0	0	0	0	0	0	0	0	0	0	0	0	0
YGR238C	KEL2	2649	0	0	0	0	0	0	0	0	0	0	0	0	0	0	0	0	0	0	0	0	0	0	0	0	0	0	0	1871 FrSh 1 A->-	0	0	0	0	0	0	0	0	0	0	0	0	0	0	0	0	0	0	0
YGR248W	SOL4	768	0	0	0	0	0	0	0	0	0	0	0	0	0	0	0	0	0	0	0	0	0	0	0	0	0	0	0	0	0	0	0	0	0	0	0	0	0	0	0	280 FrSh 1 -->A	0	0	0	0	0	0	0
YGR249W	MGA1	1371	0	1228 Stop 1 C->T	0	0	0	0	0	0	0	0	0	0	0	0	0	0	0	0	0	0	0	0	0	0	0	0	0	1274 FrSh 1 C->-	0	0	1228 Stop 1 C->T	1228 Stop 1 C->T	0	0	0	0	0	0	0	104 FrSh 1 T->-	0	0	0	0	0	0	0
YGR256W	GND2	1479	0	0	0	0	0	0	0	0	0	0	0	0	0	0	0	0	0	0	0	0	0	0	0	0	0	0	0	0	0	0	0	0	0	0	0	0	0	0	0	0	0	0	0	0	0	0	0
YGR271W	SLH1	5904	0	4985 Stop 1 G->A	0	0	0	0	0	0	0	0	0	0	0	0	0	0	0	0	0	0	0	0	0	0	0	0	0	0	0	0	0	0	0	0	0	0	0	0	0	0	0	0	0	0	0	0	0
YGR273C	YGR273C	525	0	0	0	0	0	0	0	0	0	0	0	0	0	0	0	0	0	0	0	0	0	0	0	0	0	0	0	0	0	0	0	0	0	0	0	0	0	0	0	0	0	0	0	0	0	0	0
YHL008C	YHL008C	1884	0	0	0	0	0	0	0	0	0	0	0	0	0	0	0	0	0	0	0	0	0	0	0	0	0	0	0	0	0	0	0	0	1876 Stop 1 C->T	0	0	0	0	0	0	0	0	0	0	0	0	0	0
YHL012W	YHL012W	1482	0	1071 Stop 1 T->A	0	0	0	0	0	0	0	0	0	0	0	0	0	0	0	0	0	0	0	0	781 FrSh 1 -->A	0	0	0	0	0	1071 Stop 1 T->A	0	0	0	0	0	0	0	0	0	0	0	0	0	0	1071 Stop 1 T->A	0	0	0
YHL016C	DUR3	2208	0	0	0	0	0	0	0	0	0	0	0	0	0	0	0	0	0	0	0	0	0	0	0	0	0	0	0	0	0	0	0	0	0	0	0	0	0	0	0	0	0	0	0	0	0	0	0
YHL018W	YHL018W	363	0	0	0	0	0	0	0	0	0	0	0	0	0	0	0	0	0	0	0	166 FrSh 1 -->G	0	0	0	0	0	0	0	0	0	0	0	0	0	0	0	0	0	0	0	0	0	0	0	0	0	0	0
YHL026C	YHL026C	948	0	0	0	0	0	0	0	0	0	0	0	0	0	0	0	0	0	0	0	0	0	0	0	0	0	0	0	0	0	0	0	0	0	0	0	0	0	0	0	0	0	0	0	0	0	0	0
YHL035C	VMR1	4779	0	0	0	0	0	3135 Stop 1 T->G	3135 Stop 1 T->G	0	0	0	1496 Stop 1 T->G	0	0	0	3135 Stop 1 T->G	0	0	0	0	0	0	0	0	0	0	0	0	0	0	0	0	0	0	0	0	0	0	0	0	0	0	0	1496 Stop 1 T->G	0	0	0	0
YHL039W	EFM1	1758	0	0	0	0	0	0	0	0	0	0	0	0	0	0	0	0	0	0	0	0	0	0	0	0	0	0	0	0	0	0	0	0	0	0	0	0	0	0	0	0	0	0	0	0	0	0	0
YHR007C-A	YHR007C-A	216	132 FrSh 2 -->T	132 FrSh 2 -->T	0	75 FrSh 1 T->-	75 FrSh 1 T->-	131 FrSh 2 -->T	132 FrSh 2 -->T	132 FrSh 2 -->T	0	0	132 FrSh 2 -->T	0	132 FrSh 2 -->T	132 FrSh 2 -->T	75 FrSh 1 T->-	131 FrSh 2 -->T	75 FrSh 1 T->-	132 FrSh 2 -->T	132 FrSh 2 -->T	0	0	0	132 FrSh 2 -->T	132 FrSh 2 -->T	0	132 FrSh 2 -->T	132 FrSh 2 -->T	132 FrSh 2 -->T	0	0	131 FrSh 2 -->T	131 FrSh 2 -->T	95 Stop 1 C->A	132 FrSh 2 -->T	132 FrSh 2 -->T	132 FrSh 2 -->T	0	0	132 FrSh 2 -->T	132 FrSh 2 -->T	0	132 FrSh 2 -->T	132 FrSh 2 -->T	132 FrSh 2 -->T	132 FrSh 2 -->T	132 FrSh 2 -->T	132 FrSh 2 -->T
YHR021W-A	ECM12	456	99 FrSh 1 -->T	25 Stop 1 A->T	0	0	25 Stop 1 A->T	0	0	25 Stop 1 A->T	0	0	242 Stop 1 G->A	0	99 FrSh 1 -->T	25 Stop 1 A->T	0	0	0	25 Stop 1 A->T	0	0	0	0	213 FrSh 1 T->-	0	0	25 Stop 1 A->T	0	25 Stop 1 A->T	25 Stop 1 A->T	0	25 Stop 1 A->T	25 Stop 1 A->T	63 Stop 1 T->G	42 FrSh 2 -->A	42 FrSh 2 -->A	25 Stop 1 A->T	0	0	42 FrSh 2 -->A	0	0	25 Stop 1 A->T	242 Stop 1 G->A	0	0	42 FrSh 2 -->A	25 Stop 1 A->T
YHR022C-A	YHR022C-A	90	0	0	0	0	0	0	0	0	0	0	0	0	0	0	0	0	0	0	0	0	0	0	0	0	0	0	0	0	0	0	0	0	0	0	0	0	0	0	35 Stop 1 C->A	0	0	0	0	0	0	0	0
YHR029C	YHI9	885	0	0	0	0	0	0	0	0	0	0	0	540 FrSh 1 T->-	0	0	0	0	0	0	0	0	0	0	0	0	0	0	0	0	0	0	0	0	0	0	0	0	0	0	0	0	0	0	0	0	0	0	0
YHR032W	ERC1	1746	1634 FrSh 1 A->-	1634 FrSh 1 A->-	1634 FrSh 1 A->-	1634 FrSh 1 A->-	1634 FrSh 1 A->-	1634 FrSh 1 A->-	1634 FrSh 1 A->-	1634 FrSh 1 A->-	1634 FrSh 1 A->-	1634 FrSh 1 A->-	1634 FrSh 1 A->-	1634 FrSh 1 A->-	1634 FrSh 1 A->-	1634 FrSh 1 A->-	1634 FrSh 1 A->-	1634 FrSh 1 A->-	1634 FrSh 1 A->-	1634 FrSh 1 A->-	1634 FrSh 1 A->-	1634 FrSh 1 A->-	1634 FrSh 1 A->-	1634 FrSh 1 A->-	1634 FrSh 1 A->-	1634 FrSh 1 A->-	1634 FrSh 1 A->-	1634 FrSh 1 A->-	1634 FrSh 1 A->-	1634 FrSh 1 A->-	1634 FrSh 1 A->-	1634 FrSh 1 A->-	1634 FrSh 1 A->-	1634 FrSh 1 A->-	1634 FrSh 1 A->-	1634 FrSh 1 A->-	1634 FrSh 1 A->-	1634 FrSh 1 A->-	1634 FrSh 1 A->-	1634 FrSh 1 A->-	1634 FrSh 1 A->-	1634 FrSh 1 A->-	1634 FrSh 1 A->-	1634 FrSh 1 A->-	1634 FrSh 1 A->-	1634 FrSh 1 A->-	1634 FrSh 1 A->-	1634 FrSh 1 A->-	1634 FrSh 1 A->-
YHR035W	YHR035W	1893	0	0	0	0	0	0	0	0	0	0	0	0	0	0	0	0	0	0	0	0	0	0	0	0	0	0	0	0	0	0	0	0	0	0	0	0	0	0	0	0	0	0	0	0	0	0	0
YHR048W	YHK8	1545	0	0	0	0	0	0	0	0	412 Stop 1 C->T	0	0	0	0	0	0	0	0	0	0	0	0	0	0	0	0	0	0	0	0	0	0	0	0	0	0	0	0	0	0	0	0	0	0	0	0	0	0
YHR084W	STE12	2067	0	0	0	0	0	0	0	0	0	0	0	0	0	0	0	2056 FrSh 4 G->-	0	0	0	0	0	0	0	0	0	0	0	0	0	0	0	0	0	2012 Stop 1 C->A	0	0	0	0	0	0	0	0	0	0	0	0	0
YHR104W	GRE3	984	0	0	0	0	0	0	0	0	0	0	0	0	0	0	0	0	0	0	0	0	0	0	0	0	0	0	0	0	0	0	0	0	0	0	0	0	0	0	0	0	0	0	0	0	0	0	0
YHR132C	ECM14	1293	0	0	0	0	0	0	0	0	0	0	0	0	0	0	0	0	0	0	0	0	0	0	0	0	0	0	0	0	0	0	0	0	0	0	0	0	0	0	0	0	0	0	0	0	0	0	0
YHR133C	NSG1	876	0	0	0	0	0	0	0	0	0	0	0	0	0	0	0	0	0	0	0	0	0	0	0	0	0	0	0	0	0	0	0	0	0	0	0	0	0	0	0	0	0	0	0	0	0	0	0
YHR136C	SPL2	447	340 Stop 1 C->T	0	0	0	0	0	0	0	0	0	0	0	0	0	0	0	0	0	0	0	0	0	0	0	0	0	0	0	0	0	0	0	0	0	0	0	0	0	0	0	0	0	0	0	0	0	0
YHR170W	NMD3	1557	0	0	0	0	0	0	0	0	0	0	0	0	0	0	0	0	0	0	0	0	0	0	0	0	0	0	0	0	0	0	0	0	1549 Stop 1 C->T	0	0	0	0	0	0	0	0	0	0	0	0	0	0
YHR175W	CTR2	570	20 Stop 1 G->A	0	0	0	0	0	0	0	0	0	0	0	0	0	0	0	0	0	0	0	0	0	0	0	0	0	0	0	0	0	0	0	0	0	0	0	0	0	0	0	0	0	0	0	0	0	0
YIL005W	EPS1	2106	0	0	0	0	0	0	0	0	0	0	0	0	0	0	0	0	0	0	0	0	0	0	0	0	0	0	0	0	0	0	0	0	0	0	0	0	0	0	0	0	0	0	0	0	0	0	2096 FrSh 1 A->-
YIL013C	PDR11	4236	0	0	0	0	0	0	0	0	0	0	0	0	0	0	0	0	0	0	0	0	0	0	0	818 FrSh 1 A->-	0	0	0	0	0	0	0	0	0	0	0	0	0	0	0	0	0	0	0	0	0	0	0
YIL050W	PCL7	858	0	0	0	0	0	0	0	0	0	0	0	0	0	0	0	0	0	0	0	0	0	0	0	0	0	0	0	0	0	0	0	0	853 Stop 1 C->T	0	0	0	0	0	0	0	0	0	0	0	0	0	0
YIL064W	SEE1	774	0	0	0	0	0	0	0	21 FrSh 1 -->A	0	0	0	0	0	0	0	0	0	0	0	0	0	0	0	0	0	0	0	0	0	0	0	0	0	0	0	0	0	0	0	0	0	0	0	0	0	0	0
YIL077C	YIL077C	963	0	0	0	0	0	0	0	0	0	0	0	0	0	0	0	0	0	0	0	0	0	0	0	0	0	0	0	0	0	0	0	0	0	0	0	0	0	0	0	0	0	0	0	0	0	919 Stop 1 C->T	0
YIL096C	YIL096C	1011	0	0	0	0	0	0	0	0	0	0	0	0	0	0	0	0	0	0	0	809 FrSh 1 -->A	0	0	0	0	0	0	0	0	0	0	0	0	0	0	0	0	0	0	0	0	0	0	0	0	0	0	0
YIL099W	SGA1	1650	0	0	0	0	0	0	0	0	0	0	0	0	0	0	0	0	0	0	0	0	0	0	0	0	0	0	0	0	0	0	0	0	0	0	0	0	0	0	0	0	0	0	0	0	0	0	0
YIL101C	XBP1	1944	0	0	0	0	0	0	0	0	0	0	0	0	0	0	0	0	0	0	0	0	0	0	0	0	0	0	0	0	0	0	0	0	0	0	0	0	0	0	0	0	0	0	0	0	0	0	0
YIL114C	POR2	846	0	0	0	0	0	0	0	0	0	0	0	0	0	0	0	0	0	0	0	0	0	0	0	0	0	0	0	0	0	0	0	0	0	0	0	0	0	0	0	0	0	0	0	0	0	0	0
YIL120W	QDR1	1692	0	95 Stop 1 C->G	0	0	0	0	0	0	0	0	0	0	0	0	0	0	0	0	0	0	0	0	0	0	0	0	0	0	0	0	0	0	0	0	0	0	0	0	0	0	0	0	0	0	0	0	0
YIL125W	KGD1	3045	0	0	0	0	0	0	0	0	0	0	0	0	0	0	0	0	0	0	0	0	0	0	0	0	0	0	0	0	0	0	0	0	0	0	0	0	0	0	0	0	0	0	0	0	0	0	0
YIL131C	FKH1	1455	0	0	0	0	0	0	0	0	0	0	0	0	0	0	0	0	1366 Stop 1 C->T	0	0	0	0	0	0	0	0	0	0	0	0	0	0	0	0	0	0	0	0	0	0	0	0	0	0	0	0	0	0
YIL134C-A	YIL134C-A	204	0	161 Stop 1 T->G	0	0	0	0	0	0	0	0	0	0	0	0	0	193 FrSh 2 G->-	0	0	0	0	0	0	0	0	0	0	0	130 FrSh 16 -->A	0	0	141 FrSh 2 T->-	0	57 FrSh 2 T->-	0	0	0	0	0	0	0	0	0	0	0	0	141 FrSh 2 T->-	0
YIL145C	PAN6	930	0	0	0	0	0	0	0	801 FrSh 11 -->T	0	0	0	0	0	0	0	0	0	0	0	0	0	0	0	0	0	0	0	0	0	0	0	0	0	0	0	0	0	0	0	0	0	0	0	0	0	0	0
YIL149C	MLP2	5040	0	0	0	0	0	0	0	0	0	0	0	0	0	0	0	0	0	0	0	0	0	0	0	0	0	0	0	0	0	0	0	0	0	4275 Stop 1 C->G	0	0	0	0	0	0	0	0	0	0	0	0	0
YIL156W-B	YIL156W-B	284	0	0	0	0	0	0	0	0	0	0	0	0	0	0	0	0	0	0	0	0	0	0	0	245 Stop 1 T->A	0	0	0	0	0	0	0	0	0	0	0	0	0	0	0	0	0	0	0	0	0	0	0
YIL158W	AIM20	615	0	0	0	0	0	0	0	0	0	0	0	0	0	0	0	0	0	0	0	0	0	0	0	0	0	0	0	0	0	0	0	0	0	0	0	0	0	0	0	0	0	0	0	0	0	0	0
YIL161W	YIL161W	708	0	0	0	0	0	0	0	0	0	0	0	0	0	0	0	0	0	0	0	0	108 FrSh 79 T->-	0	0	0	0	0	0	0	0	0	0	0	0	0	0	0	0	0	0	0	108 FrSh 79 T->-	0	0	0	0	0	0
YIR010W	DSN1	1731	0	0	0	0	0	0	0	0	0	0	0	0	0	0	0	0	0	0	0	0	0	0	0	0	0	0	0	0	0	0	0	0	0	0	0	0	0	0	0	0	0	0	0	0	0	0	0
YIR018C-A	YIR018C-A	138	61 FrSh 1 -->A	61 FrSh 4 A->-	61 FrSh 1 A->-	0	61 FrSh 5 -->A	61 FrSh 2 A->-	61 FrSh 1 A->-	61 FrSh 4 A->-	61 FrSh 1 -->A	61 FrSh 1 -->A	61 FrSh 5 A->-	0	0	0	0	0	61 FrSh 4 -->A	61 FrSh 2 A->-	61 FrSh 8 A->-	61 FrSh 1 -->A	61 FrSh 2 A->-	61 FrSh 1 A->-	0	0	61 FrSh 1 -->A	61 FrSh 4 A->-	0	61 FrSh 1 -->A	61 FrSh 5 A->-	61 FrSh 2 A->-	61 FrSh 4 A->-	61 FrSh 7 -->A	63 FrSh 2 -->A	61 FrSh 4 -->A	0	61 FrSh 4 A->-	61 FrSh 2 -->A	61 FrSh 1 -->A	61 FrSh 2 -->A	61 FrSh 4 -->A	61 FrSh 8 A->-	61 FrSh 2 -->A	61 FrSh 8 A->-	0	63 FrSh 2 T->-	63 FrSh 1 T->-	61 FrSh 4 -->A
YIR024C	YIR024C	651	0	0	0	0	0	0	0	0	0	0	0	0	0	0	0	0	0	0	0	0	0	0	0	0	0	0	0	0	0	0	0	0	0	0	0	463 FrSh 2 A->-	0	0	0	0	0	0	0	0	0	0	0
YIR028W	DAL4	1908	0	0	0	0	0	0	0	0	0	0	1201 FrSh 1 A->-	0	0	0	0	0	0	0	0	0	0	396 Stop 1 G->A	0	0	0	0	0	0	0	0	0	0	0	0	0	0	397 Stop 1 C->T	0	0	0	0	0	1201 FrSh 1 A->-	0	0	0	0
YJL027C	YJL027C	417	0	0	0	0	0	0	0	0	0	0	0	0	0	0	0	0	0	0	0	0	0	0	0	0	0	0	0	0	0	0	0	0	257 Stop 1 G->A	0	0	0	0	0	0	0	0	0	0	0	0	0	0
YJL028W	YJL028W	336	134 FrSh 1 T->-	134 FrSh 1 T->-	134 FrSh 1 T->-	134 FrSh 1 T->-	134 FrSh 1 T->-	134 FrSh 1 T->-	134 FrSh 1 T->-	134 FrSh 1 T->-	134 FrSh 1 T->-	134 FrSh 1 T->-	148 FrSh 23 C->-	134 FrSh 1 T->-	134 FrSh 1 T->-	134 FrSh 1 T->-	134 FrSh 1 T->-	134 FrSh 1 T->-	134 FrSh 1 T->-	134 FrSh 1 T->-	134 FrSh 1 T->-	134 FrSh 1 T->-	134 FrSh 1 T->-	134 FrSh 1 T->-	134 FrSh 1 T->-	326 FrSh 1 A->-	134 FrSh 1 T->-	134 FrSh 1 T->-	134 FrSh 1 T->-	134 FrSh 1 T->-	0	134 FrSh 1 T->-	0	0	134 FrSh 1 T->-	134 FrSh 1 T->-	326 FrSh 1 A->-	134 FrSh 1 T->-	134 FrSh 1 T->-	134 FrSh 1 T->-	134 FrSh 1 T->-	134 FrSh 1 T->-	134 FrSh 1 T->-	134 FrSh 1 T->-	148 FrSh 23 C->-	134 FrSh 1 T->-	134 FrSh 1 T->-	134 FrSh 1 T->-	134 FrSh 1 T->-
YJL045W	YJL045W	1905	0	479 FrSh 2 G->-	0	0	0	0	0	479 FrSh 2 G->-	0	0	0	0	0	0	0	0	0	0	0	0	0	0	0	0	0	0	0	0	0	0	0	0	0	0	0	0	0	0	0	0	0	0	0	0	0	0	0
YJL073W	JEM1	1938	0	0	0	0	0	0	0	0	0	0	0	0	0	0	0	0	0	0	0	0	0	0	0	0	0	0	0	0	0	0	0	0	0	0	0	0	0	0	0	0	0	0	0	0	0	0	0
YJL083W	TAX4	1815	0	0	0	0	0	0	0	0	0	0	0	0	0	0	0	0	0	0	0	0	0	0	0	0	0	0	0	0	0	0	0	0	0	0	0	0	0	0	0	0	0	0	0	0	0	0	0
YJL084C	ALY2	3141	0	0	0	0	0	0	0	0	0	0	0	0	0	0	0	0	0	0	0	0	0	0	0	0	0	0	0	0	0	0	0	0	0	0	0	0	0	0	0	0	0	0	0	0	0	0	2303 FrSh 19 A->-
YJL089W	SIP4	2490	0	0	0	0	0	0	0	0	0	0	0	0	0	0	0	0	0	0	0	0	0	0	0	0	0	0	0	0	0	0	0	0	0	0	0	0	0	0	0	0	0	0	0	0	0	0	0
YJL100W	LSB6	1824	0	0	0	1385 Stop 1 G->A	0	0	0	0	0	0	0	0	0	0	0	0	0	0	0	0	0	0	0	0	0	0	0	0	0	0	0	0	0	0	0	0	0	0	0	0	0	0	0	0	0	0	0
YJL103C	GSM1	1857	0	0	0	0	0	0	0	0	0	0	0	0	0	0	0	0	0	0	0	0	0	0	0	0	0	0	0	0	0	0	0	0	0	0	0	0	0	0	0	0	0	0	0	0	0	0	0
YJL104W	PAM16	450	0	0	0	0	0	0	0	0	0	0	0	0	0	0	0	0	0	0	0	0	0	0	0	0	0	0	0	0	0	0	0	0	0	0	0	0	0	0	0	0	0	0	0	0	0	0	404 Stop 1 C->G
YJL107C	YJL107C	1164	1144 FrSh 1 -->T	1144 FrSh 1 -->T	1144 FrSh 1 -->T	1144 FrSh 1 -->T	1144 FrSh 1 -->T	1144 FrSh 1 -->T	1144 FrSh 1 -->T	1144 FrSh 1 -->T	1144 FrSh 1 -->T	1144 FrSh 1 -->T	1144 FrSh 1 -->T	1144 FrSh 1 -->T	1144 FrSh 1 -->T	1144 FrSh 1 -->T	1144 FrSh 1 -->T	1144 FrSh 1 -->T	1144 FrSh 1 -->T	1144 FrSh 1 -->T	1144 FrSh 1 -->T	1144 FrSh 1 -->T	1144 FrSh 1 -->T	1144 FrSh 1 -->T	1144 FrSh 1 -->T	1144 FrSh 1 -->T	1144 FrSh 1 -->T	1144 FrSh 1 -->T	1144 FrSh 1 -->T	1144 FrSh 1 -->T	1144 FrSh 1 -->T	1144 FrSh 1 -->T	1144 FrSh 1 -->T	1144 FrSh 1 -->T	1144 FrSh 1 -->T	1144 FrSh 1 -->T	1144 FrSh 1 -->T	1144 FrSh 1 -->T	1144 FrSh 1 -->T	1144 FrSh 1 -->T	1144 FrSh 1 -->T	1144 FrSh 1 -->T	1144 FrSh 1 -->T	1144 FrSh 1 -->T	1144 FrSh 1 -->T	1144 FrSh 1 -->T	1144 FrSh 1 -->T	1144 FrSh 1 -->T	1144 FrSh 1 -->T
YJL110C	GZF3	1656	0	0	0	0	0	0	0	0	0	0	0	0	0	0	0	0	0	0	0	0	0	0	0	0	0	0	0	0	0	0	1630 Stop 1 A->T	0	1633 Stop 1 C->T	0	1630 Stop 1 A->T	0	0	0	0	0	0	0	0	0	0	0	0
YJL129C	TRK1	3708	0	0	0	0	0	0	0	0	0	0	0	0	0	0	0	3676 Stop 1 C->T	0	0	0	0	0	0	0	0	0	0	3676 Stop 1 C->T	0	0	0	1395 FrSh 1 A->-	0	0	0	0	0	0	0	0	0	0	0	0	0	0	0	0
YJL136W-A	YJL136W-A	84	0	0	0	0	0	0	0	0	0	0	0	0	0	0	0	0	0	0	0	0	0	0	81 FrSh 1 -->C	0	0	0	0	0	0	0	0	0	0	0	0	0	0	0	0	0	0	0	0	0	0	0	0
YJL137C	GLG2	1143	0	0	0	0	0	0	0	0	0	0	0	201 FrSh 2 T->-	0	0	0	393 FrSh 1 -->T	0	0	0	0	0	0	0	0	0	0	0	0	727 Stop 1 C->T	0	0	0	0	0	0	0	0	0	0	0	0	0	0	0	0	0	0
YJL144W	YJL144W	315	0	0	0	46 FrSh 1 -->A	0	0	0	0	0	0	0	0	0	0	0	0	0	0	0	0	0	0	0	0	0	0	0	0	0	0	0	0	0	0	0	0	0	0	0	0	0	0	0	0	0	0	0
YJL146W	IDS2	1410	0	0	0	0	0	0	0	0	0	0	0	0	1384 Stop 1 C->T	0	0	0	0	0	0	0	0	0	0	0	0	0	0	0	0	0	0	0	0	0	0	0	0	0	0	0	0	0	0	0	0	0	0
YJL165C	HAL5	2568	0	0	0	0	0	0	0	0	0	0	0	0	0	0	0	0	0	0	0	0	0	0	0	1218 FrSh 1 -->A	0	0	0	0	0	0	0	0	0	0	0	0	0	0	0	0	0	0	0	0	0	0	0
YJL181W	YJL181W	1836	0	0	0	0	0	0	0	0	0	0	0	0	0	0	0	0	0	0	0	0	0	0	0	0	0	0	0	0	0	0	0	0	0	0	0	0	0	0	0	0	0	0	0	0	0	0	0
YJL186W	MNN5	1761	0	0	0	0	0	0	0	0	0	0	1757 FrSh 1 A->-	0	0	0	0	0	0	0	0	0	0	0	0	0	0	0	0	0	0	0	0	0	0	0	0	0	0	0	0	0	0	0	1757 FrSh 1 A->-	0	0	0	0
YJL207C	LAA1	6045	0	0	0	0	0	0	0	0	0	0	0	2913 FrSh 1 A->-	0	0	0	0	0	0	0	0	0	0	0	0	0	0	0	0	0	0	0	0	0	0	0	0	0	0	0	0	0	0	0	0	0	0	0
YJL213W	YJL213W	996	0	0	0	0	0	0	0	0	0	0	0	0	0	0	0	684 FrSh 1 -->T	0	0	0	0	0	0	0	0	0	0	0	0	0	0	0	0	0	0	0	0	0	0	0	0	0	0	0	0	0	0	0
YJR031C	GEA1	4227	0	0	0	0	0	0	0	0	0	0	0	0	0	0	0	0	0	0	0	0	0	0	0	0	0	0	0	0	0	0	0	0	0	0	0	0	0	2280 Stop 1 G->A	0	0	0	0	0	0	0	0	0
YJR062C	NTA1	1374	0	0	0	0	0	0	0	0	0	0	0	0	0	0	0	387 FrSh 1 -->G	0	0	0	0	0	0	0	0	0	0	0	0	0	0	0	0	0	0	0	0	0	0	0	0	0	0	0	0	0	0	0
YJR092W	BUD4	4344	0	4325 FrSh 1 T->-	0	0	0	0	0	0	0	0	0	0	0	0	0	0	0	0	0	0	0	0	4325 FrSh 1 T->-	0	0	0	0	0	4325 FrSh 1 T->-	0	0	0	0	0	0	0	0	0	0	0	0	0	0	0	0	0	0
YJR096W	YJR096W	849	0	0	0	0	0	0	0	0	0	0	0	0	0	0	0	0	0	0	0	0	0	0	0	0	0	0	0	0	0	0	0	0	0	0	0	0	0	0	0	0	0	0	0	0	0	0	0
YJR098C	YJR098C	1971	0	0	0	0	0	0	0	0	0	0	0	0	0	0	0	0	0	0	0	0	0	0	0	0	871 Stop 1 G->T	0	0	0	0	0	0	0	0	0	0	0	0	0	0	0	0	0	0	0	0	0	0
YJR105W	ADO1	1023	0	0	0	0	0	0	0	0	0	1006 FrSh 1 -->A	0	0	0	0	0	0	0	0	0	0	0	0	0	0	0	0	0	0	0	0	0	0	0	0	0	0	0	0	0	0	0	0	0	0	0	0	0
YJR112W-A	YJR112W-A	379	0	0	0	0	0	0	0	0	0	0	0	0	0	0	0	211 Stop 1 C->T	0	0	0	0	0	0	0	0	0	0	0	0	0	0	0	0	0	0	0	0	0	0	208 Stop 1 C->T	0	0	0	0	0	0	0	0
YJR120W	YJR120W	351	0	0	0	282 Stop 1 T->A	0	0	0	0	282 Stop 1 T->A	0	0	0	0	0	282 Stop 1 T->A	0	0	0	0	0	0	0	0	282 Stop 1 T->A	0	0	0	0	0	0	0	0	0	0	245 FrSh 1 C->-	0	0	0	0	0	0	0	0	0	0	0	0
YJR126C	VPS70	2436	0	0	34 FrSh 2 -->A	34 FrSh 2 -->A	0	0	0	0	0	34 FrSh 2 -->A	0	34 FrSh 2 -->A	0	28 FrSh 4 A->-	34 FrSh 2 -->A	0	34 FrSh 2 -->A	34 FrSh 2 -->A	34 FrSh 2 -->A	34 FrSh 2 -->A	28 FrSh 4 A->-	0	0	20 FrSh 2 -->A	34 FrSh 2 -->A	0	0	0	0	34 FrSh 2 -->A	0	0	0	0	26 FrSh 2 A->-	28 FrSh 4 A->-	34 FrSh 2 -->A	34 FrSh 2 -->A	28 FrSh 4 A->-	0	0	28 FrSh 4 A->-	0	28 FrSh 4 A->-	0	28 FrSh 4 A->-	0
YJR127C	RSF2	4143	250 Stop 1 C->T	0	0	0	0	0	0	0	0	0	0	0	250 Stop 1 C->T	197 FrSh 1 T->-	0	0	0	0	0	0	0	0	197 FrSh 1 T->-	0	0	0	0	0	0	0	0	0	220 Stop 1 C->T	0	0	197 FrSh 1 -->T	0	0	197 FrSh 1 T->-	0	0	197 FrSh 1 T->-	0	0	0	0	0
YJR147W	HMS2	1077	0	0	0	0	0	0	0	0	0	0	0	0	0	0	0	0	0	0	0	0	0	0	0	0	0	0	0	0	0	0	0	0	0	0	0	0	0	0	0	0	0	0	0	0	0	0	0
YJR152W	DAL5	1632	0	0	0	50 FrSh 1 A->-	50 FrSh 1 A->-	50 FrSh 1 A->-	50 FrSh 1 A->-	0	50 FrSh 1 A->-	50 FrSh 1 A->-	0	0	0	0	0	0	50 FrSh 1 A->-	50 FrSh 1 A->-	0	50 FrSh 1 A->-	0	0	0	0	50 FrSh 1 A->-	0	0	0	0	50 FrSh 1 A->-	0	0	0	0	0	0	50 FrSh 1 A->-	50 FrSh 1 A->-	0	0	50 FrSh 1 A->-	0	0	0	0	0	0
YJR154W	YJR154W	1041	0	0	0	0	0	0	0	0	0	0	0	0	607 Stop 1 A->T	0	0	0	0	0	0	0	0	0	0	0	0	0	0	0	0	0	0	0	0	0	0	0	0	0	0	0	0	0	0	0	0	0	0
YKL021C	MAK11	1407	0	0	0	0	0	0	0	0	41 FrSh 1 T->-	0	0	0	0	0	0	0	0	0	0	0	0	0	0	0	0	0	0	0	0	0	0	0	41 FrSh 1 -->T	0	41 FrSh 1 -->T	0	0	0	0	0	0	0	0	0	0	0	0
YKL022C	CDC16	2523	0	0	0	0	0	0	0	0	0	0	0	0	0	0	0	0	0	0	0	0	0	0	0	0	0	0	0	0	0	0	0	0	0	0	0	0	0	0	0	0	0	0	0	0	0	0	0
YKL023C-A	YKL023C-A	228	0	0	0	0	0	0	0	0	0	0	0	0	0	0	0	0	0	0	0	0	0	0	0	0	0	0	0	0	0	0	0	0	0	0	0	0	0	0	0	0	0	0	0	0	30 FrSh 2 A->-	0	0
YKL028W	TFA1	1449	0	0	0	0	0	0	0	0	0	0	0	1421 FrSh 1 -->T	1421 FrSh 1 -->T	0	1421 FrSh 1 -->T	0	0	0	0	0	0	0	0	0	0	0	0	0	0	0	0	0	0	0	0	0	0	0	0	0	0	0	0	1421 FrSh 1 -->T	0	0	0
YKL037W	AIM26	357	0	0	0	0	0	0	0	0	0	0	0	0	0	0	0	0	0	0	0	0	0	0	68 Stop 1 T->A	0	0	0	0	0	0	0	0	0	0	0	0	0	0	0	0	0	0	0	0	0	0	0	0
YKL043W	PHD1	1101	0	0	0	0	0	0	0	0	0	0	0	0	0	0	0	0	0	0	0	0	0	0	0	0	0	0	0	0	0	0	0	0	0	1097 Stop 1 C->G	0	0	0	0	0	0	0	0	0	0	0	0	0
YKL050C	YKL050C	2769	0	0	0	0	0	0	0	0	0	0	0	0	0	0	0	0	0	0	0	0	0	0	0	0	0	0	0	0	0	0	0	0	0	0	0	0	0	0	0	0	0	0	0	0	0	0	0
YKL068W-A	YKL068W-A	237	0	0	0	0	0	0	0	0	0	0	0	0	0	0	0	0	0	0	0	0	0	0	0	0	0	0	0	0	0	0	0	0	0	0	0	0	0	0	0	0	0	0	0	107 Stop 1 T->G	0	0	0
YKL070W	YKL070W	510	0	482 FrSh 1 A->-	0	0	0	0	482 FrSh 1 A->-	482 FrSh 1 A->-	0	0	0	0	0	164 Stop 1 C->A	0	482 FrSh 1 A->-	482 FrSh 1 A->-	482 FrSh 1 A->-	0	0	0	0	0	0	0	0	0	187 Stop 1 G->T	482 FrSh 1 A->-	0	482 FrSh 1 A->-	482 FrSh 1 A->-	45 Stop 1 C->G	0	318 Stop 1 G->A	482 FrSh 1 A->-	0	0	434 FrSh 1 -->T	482 FrSh 1 A->-	482 FrSh 1 A->-	164 Stop 1 C->A	0	0	0	0	0
YKL071W	YKL071W	771	0	0	0	0	0	0	0	0	0	0	0	0	0	0	0	0	0	0	0	0	0	0	0	0	0	0	0	0	0	0	0	0	0	0	0	0	0	0	0	0	0	0	0	0	0	0	0
YKL084W	HOT13	351	0	0	0	0	0	0	0	0	0	0	0	0	0	0	0	0	0	0	0	0	0	0	0	0	0	0	0	0	0	0	0	0	0	0	0	0	0	0	0	0	0	0	0	0	0	0	0
YKL089W	MIF2	1650	0	0	0	0	0	0	0	0	0	0	0	0	0	0	0	0	0	0	0	0	0	0	0	0	0	0	0	0	0	0	0	0	0	0	0	0	0	0	0	0	0	0	0	1029 FrSh 1 A->-	0	0	0
YKL093W	MBR1	1020	0	0	0	0	0	0	0	0	0	0	0	0	0	0	0	0	0	0	0	0	940 Stop 1 C->T	0	0	0	0	0	0	0	0	0	0	0	0	0	0	0	0	0	0	0	0	0	0	0	0	0	0
YKL101W	HSL1	4557	0	0	0	0	0	0	0	0	0	0	0	0	0	0	0	0	0	0	0	0	0	0	0	0	0	0	0	0	0	0	0	0	0	0	0	0	0	0	0	0	0	0	0	0	0	0	0
YKL114C	APN1	1104	0	0	0	0	0	0	0	0	0	0	0	0	0	0	0	0	0	0	0	0	0	0	1099 Stop 1 G->T	0	0	0	0	0	0	0	0	0	0	0	0	0	0	0	0	0	0	0	0	0	0	0	0
YKL132C	RMA1	1293	0	0	0	0	0	0	0	0	0	0	0	0	0	0	0	0	0	0	0	0	0	0	0	0	0	0	0	0	0	0	0	0	1282 FrSh 2 -->T	0	0	0	0	0	0	0	0	0	0	0	0	0	0
YKL162C	YKL162C	1209	0	0	0	0	0	0	0	0	0	0	0	0	0	0	0	0	0	0	0	0	0	0	0	0	0	0	0	0	0	0	0	0	0	0	0	0	0	0	955 Stop 1 C->T	0	0	0	0	0	0	0	0
YKL189W	HYM1	1200	0	0	0	0	0	0	0	0	0	0	0	0	0	0	0	0	0	0	0	0	0	0	0	0	0	0	0	0	0	0	0	0	0	0	0	0	0	0	0	0	0	0	0	1193 Stop 1 C->A	0	0	0
YKL198C	PTK1	1989	1752 FrSh 1 -->C	1752 FrSh 1 -->C	1752 FrSh 1 -->C	1752 FrSh 1 -->C	1752 FrSh 1 -->C	1752 FrSh 1 -->C	1752 FrSh 1 -->C	1752 FrSh 1 -->C	1752 FrSh 1 -->C	1752 FrSh 1 -->C	1752 FrSh 1 -->C	1752 FrSh 1 -->C	1752 FrSh 1 -->C	1752 FrSh 1 -->C	1752 FrSh 1 -->C	1752 FrSh 1 -->C	1752 FrSh 1 -->C	1752 FrSh 1 -->C	1752 FrSh 1 -->C	1752 FrSh 1 -->C	1752 FrSh 1 -->C	1752 FrSh 1 -->C	1752 FrSh 1 -->C	1752 FrSh 1 -->C	1752 FrSh 1 -->C	1752 FrSh 1 -->C	1752 FrSh 1 -->C	1752 FrSh 1 -->C	1752 FrSh 1 -->C	1752 FrSh 1 -->C	1752 FrSh 1 -->C	1752 FrSh 1 -->C	1752 FrSh 1 -->C	1752 FrSh 1 -->C	1752 FrSh 1 -->C	1752 FrSh 1 -->C	1752 FrSh 1 -->C	1752 FrSh 1 -->C	1752 FrSh 1 -->C	1752 FrSh 1 -->C	1752 FrSh 1 -->C	1752 FrSh 1 -->C	1752 FrSh 1 -->C	1752 FrSh 1 -->C	1752 FrSh 1 -->C	1752 FrSh 1 -->C	1752 FrSh 1 -->C
YKL209C	STE6	3873	0	0	0	0	0	0	0	0	0	0	0	0	0	0	0	0	0	0	0	0	0	0	0	0	0	0	0	0	0	0	0	0	3862 Stop 1 C->T	0	0	0	0	0	0	0	0	0	0	0	0	0	0
YKR005C	YKR005C	1647	0	0	0	0	0	0	0	0	0	0	0	0	0	0	0	0	0	0	0	0	0	0	0	0	180 Stop 1 T->A	0	0	0	0	0	0	0	0	0	0	0	0	0	0	0	0	0	0	0	0	0	0
YKR015C	YKR015C	1707	0	0	0	0	0	0	0	0	0	0	0	0	0	0	0	0	0	0	0	0	0	0	0	0	0	0	0	0	1201 Stop 1 A->T	0	0	0	0	0	0	0	0	0	0	0	0	0	0	0	0	0	0
YKR041W	YKR041W	753	122 FrSh 4 -->T	0	0	0	0	0	0	0	0	0	0	0	122 FrSh 4 -->T	0	0	0	0	0	0	0	0	0	0	0	0	0	0	0	0	0	0	0	0	0	0	0	0	0	0	0	0	0	0	0	0	0	0
YKR061W	KTR2	1278	0	0	0	0	0	0	0	0	0	0	0	0	0	0	0	0	128 Stop 1 C->A	0	0	0	0	0	0	0	0	0	0	0	0	0	0	0	0	0	0	0	0	0	0	0	0	0	0	0	0	0	0
YKR064W	OAF3	2592	0	0	0	0	0	0	0	0	0	0	0	0	0	0	0	0	0	0	0	0	0	0	0	0	0	0	0	0	0	0	0	0	0	0	0	0	0	0	0	0	0	0	0	0	0	0	0
YKR076W	ECM4	1113	0	0	0	0	0	0	0	0	0	0	0	0	0	0	0	0	0	0	0	0	0	0	0	0	0	0	0	0	0	0	0	0	0	0	0	0	0	0	0	0	0	0	0	0	0	0	0
YKR093W	PTR2	1806	0	0	0	0	0	0	0	0	803 FrSh 1 -->T	0	0	0	0	0	0	0	0	185 FrSh 1 G->-	185 FrSh 1 G->-	0	0	0	0	0	0	0	0	0	0	0	0	0	0	0	0	0	823 FrSh 5 -->C	0	0	0	189 FrSh 1 -->C	0	0	0	0	0	0
YKR096W	YKR096W	3588	0	0	0	0	0	0	0	0	0	0	0	0	0	0	0	0	0	0	0	0	0	0	0	0	0	0	0	0	0	0	0	0	0	0	0	0	0	0	0	0	0	0	0	0	0	0	0
YKR098C	UBP11	2154	0	0	0	0	0	0	0	0	0	0	0	0	1832 FrSh 1 -->A	0	0	0	0	0	0	0	0	0	0	0	0	0	0	0	0	0	0	0	0	0	0	0	0	0	0	0	0	0	0	0	0	0	0
YLL006W-A	YLL006W-A	177	95 FrSh 1 T->-	95 FrSh 1 T->-	95 FrSh 1 T->-	95 FrSh 1 T->-	95 FrSh 1 T->-	95 FrSh 1 T->-	95 FrSh 1 T->-	95 FrSh 1 T->-	95 FrSh 1 T->-	95 FrSh 1 T->-	95 FrSh 1 T->-	95 FrSh 1 T->-	95 FrSh 1 T->-	95 FrSh 1 T->-	95 FrSh 1 T->-	95 FrSh 1 T->-	95 FrSh 1 T->-	95 FrSh 1 T->-	95 FrSh 1 T->-	95 FrSh 1 T->-	95 FrSh 1 T->-	95 FrSh 1 T->-	95 FrSh 1 T->-	95 FrSh 1 T->-	95 FrSh 1 T->-	95 FrSh 1 T->-	95 FrSh 1 T->-	95 FrSh 1 T->-	95 FrSh 1 T->-	95 FrSh 1 T->-	95 FrSh 1 T->-	95 FrSh 1 T->-	95 FrSh 1 T->-	95 FrSh 1 T->-	95 FrSh 1 T->-	95 FrSh 1 T->-	95 FrSh 1 T->-	95 FrSh 1 T->-	95 FrSh 1 T->-	95 FrSh 1 T->-	95 FrSh 1 T->-	95 FrSh 1 T->-	95 FrSh 1 T->-	95 FrSh 1 T->-	95 FrSh 1 T->-	95 FrSh 1 T->-	95 FrSh 1 T->-
YLL014W	EMC6	327	0	0	0	0	0	0	0	0	0	0	0	0	0	0	0	0	0	0	0	0	0	0	0	0	0	0	0	0	0	0	0	0	0	0	0	0	0	0	0	0	0	0	0	0	0	0	0
YLL018C-A	COX19	297	0	0	0	0	0	0	0	0	0	0	0	0	0	0	0	0	0	0	0	0	0	0	0	0	0	0	0	0	0	0	0	0	0	0	0	0	0	0	0	0	0	0	0	0	0	292 Stop 1 A->T	0
YLL046C	RNP1	750	0	0	0	0	0	0	0	0	0	0	0	0	0	0	0	0	0	0	0	0	0	0	0	0	0	0	0	0	0	0	437 FrSh 1 -->A	0	0	0	0	0	0	0	0	0	0	0	0	0	0	0	0
YLL051C	FRE6	2139	0	1610 FrSh 1 A->-	0	0	0	0	0	0	0	0	0	0	0	0	0	0	0	0	0	0	0	0	0	0	0	0	0	1894 Stop 1 C->T	0	0	0	0	0	0	0	0	0	0	0	0	0	0	0	0	0	0	0
YLL052C	AQY2	450	0	0	0	323 FrSh 11 -->T	0	323 FrSh 11 -->T	323 FrSh 11 -->T	323 FrSh 11 -->T	0	0	323 FrSh 11 -->T	0	0	323 FrSh 11 -->T	0	323 FrSh 11 -->T	0	323 FrSh 11 -->T	0	0	323 FrSh 11 -->T	0	188 Stop 1 G->A	323 FrSh 11 -->T	0	323 FrSh 11 -->T	323 FrSh 11 -->T	323 FrSh 11 -->T	323 FrSh 11 -->T	0	323 FrSh 11 -->T	323 FrSh 11 -->T	323 FrSh 11 -->T	323 FrSh 11 -->T	323 FrSh 11 -->T	323 FrSh 11 -->T	0	0	323 FrSh 11 -->T	323 FrSh 11 -->T	323 FrSh 11 -->T	323 FrSh 11 -->T	323 FrSh 11 -->T	323 FrSh 11 -->T	323 FrSh 11 -->T	323 FrSh 11 -->T	0
YLL053C	YLL053C	459	0	0	0	0	0	0	0	0	0	0	0	0	0	0	0	0	0	0	0	0	0	0	0	0	0	0	0	0	0	0	0	0	0	0	0	0	0	0	0	0	0	0	0	0	0	117 FrSh 1 G->-	0
YLL055W	YCT1	1596	0	0	0	0	0	0	0	0	0	0	0	0	150 FrSh 1 A->-	0	0	0	0	0	0	0	0	0	0	0	0	0	0	0	0	0	0	0	0	0	0	0	0	0	0	0	0	0	0	0	0	0	0
YLL057C	JLP1	1239	0	0	0	0	0	0	0	0	0	0	651 Stop 1 G->A	0	0	0	0	0	0	0	0	0	0	0	0	0	0	0	0	0	0	0	0	0	0	0	0	0	0	0	0	0	0	0	651 Stop 1 G->A	0	0	0	0
YLL061W	MMP1	1752	0	0	536 Stop 1 G->A	0	0	0	0	0	0	0	0	0	0	0	536 Stop 1 G->A	0	0	0	0	0	0	0	0	992 FrSh 1 -->T	0	0	536 Stop 1 G->A	0	0	0	563 Stop 1 G->A	536 Stop 1 G->A	0	0	289 FrSh 1 G->-	0	0	0	0	0	563 Stop 1 G->A	0	0	0	0	0	536 Stop 1 G->A
YLR001C	YLR001C	2589	0	0	0	0	0	0	0	0	0	0	0	0	0	0	0	0	0	0	0	0	0	0	0	0	0	0	0	0	0	0	0	0	0	0	0	0	0	0	0	0	0	0	0	0	0	0	0
YLR011W	LOT6	576	0	0	0	0	0	0	0	0	0	0	0	0	0	0	0	0	0	0	0	0	0	0	0	0	0	0	0	0	314 FrSh 1 A->-	0	0	0	0	0	0	0	0	0	0	0	0	0	0	0	0	0	0
YLR013W	GAT3	426	0	0	0	0	0	0	0	0	0	0	0	0	0	0	0	0	0	0	0	0	0	0	0	0	0	0	0	0	0	405 Stop 1 T->A	0	0	0	0	0	0	0	0	0	0	0	0	0	0	0	0	0
YLR030W	YLR030W	792	767 FrSh 1 -->T	767 FrSh 1 -->T	767 FrSh 1 -->T	0	767 FrSh 1 -->T	767 FrSh 1 -->T	767 FrSh 1 -->T	767 FrSh 1 -->T	767 FrSh 1 -->T	767 FrSh 1 -->T	767 FrSh 1 -->T	767 FrSh 1 -->T	767 FrSh 1 -->T	767 FrSh 1 -->T	767 FrSh 1 -->T	767 FrSh 1 -->T	767 FrSh 1 -->T	767 FrSh 1 -->T	767 FrSh 1 -->T	767 FrSh 1 -->T	767 FrSh 1 -->T	767 FrSh 1 -->T	767 FrSh 1 -->T	767 FrSh 1 -->T	767 FrSh 1 -->T	767 FrSh 1 -->T	767 FrSh 1 -->T	767 FrSh 1 -->T	767 FrSh 1 -->T	767 FrSh 1 -->T	767 FrSh 1 -->T	767 FrSh 1 -->T	767 FrSh 1 -->T	767 FrSh 1 -->T	767 FrSh 1 -->T	767 FrSh 1 -->T	767 FrSh 1 -->T	767 FrSh 1 -->T	767 FrSh 1 -->T	767 FrSh 1 -->T	767 FrSh 1 -->T	767 FrSh 1 -->T	767 FrSh 1 -->T	767 FrSh 1 -->T	767 FrSh 1 -->T	694 Stop 1 C->T	767 FrSh 1 -->T
YLR036C	YLR036C	612	0	608 FrSh 1 A->-	0	0	608 FrSh 1 A->-	0	0	608 FrSh 1 A->-	0	0	608 FrSh 1 A->-	608 FrSh 1 A->-	0	608 FrSh 1 A->-	0	608 FrSh 1 A->-	0	0	0	0	0	0	152 FrSh 1 -->A	0	0	0	608 FrSh 1 A->-	608 FrSh 1 A->-	608 FrSh 1 A->-	0	608 FrSh 1 A->-	420 FrSh 1 T->-	608 FrSh 1 A->-	608 FrSh 1 A->-	608 FrSh 1 A->-	608 FrSh 1 A->-	0	0	608 FrSh 1 A->-	608 FrSh 1 A->-	608 FrSh 1 A->-	608 FrSh 1 A->-	608 FrSh 1 A->-	608 FrSh 1 A->-	608 FrSh 1 A->-	608 FrSh 1 A->-	0
YLR039C	RIC1	3171	0	0	0	0	0	0	0	0	0	0	0	0	0	0	0	0	0	0	0	0	0	0	0	0	0	0	0	0	0	0	0	0	0	0	0	0	0	0	0	0	0	0	0	0	0	0	0
YLR049C	YLR049C	1287	0	0	0	0	0	0	0	0	0	0	0	0	0	0	0	0	0	0	0	0	0	0	0	0	0	0	0	0	0	0	0	0	0	0	0	0	0	0	0	0	0	0	0	0	0	0	0
YLR053C	YLR053C	327	0	0	0	0	0	0	0	0	0	0	0	0	0	0	0	0	0	0	0	0	0	191 FrSh 1 T->-	0	0	0	0	0	0	0	0	0	0	0	0	0	0	0	0	0	0	0	0	0	0	0	0	0
YLR057W	YLR057W	2550	0	0	0	0	0	0	0	0	0	0	0	0	0	0	0	0	0	0	0	0	0	0	0	0	0	0	0	0	0	0	0	0	0	0	0	0	0	0	0	0	0	0	1261 FrSh 1 A->-	0	0	0	0
YLR059C	REX2	810	0	0	0	0	0	0	0	0	0	0	0	0	0	0	0	0	0	0	0	0	0	0	0	0	0	0	0	0	0	0	0	0	769 FrSh 1 T->-	0	0	0	0	0	0	0	0	0	0	0	0	0	0
YLR066W	SPC3	555	0	0	0	0	0	0	0	0	0	0	0	0	0	0	0	0	0	0	0	0	0	0	0	0	0	0	0	0	0	0	0	545 FrSh 1 -->A	0	0	0	0	0	0	0	0	0	0	0	0	0	0	0
YLR070C	XYL2	1071	5 FrSh 1 C->-	0	0	0	0	0	0	0	0	0	0	0	0	0	0	0	0	0	0	0	0	0	0	0	0	0	0	0	0	0	0	0	0	0	0	0	0	0	0	0	0	0	0	0	0	0	0
YLR088W	GAA1	1845	0	0	0	0	0	0	0	0	1810 FrSh 1 T->-	0	0	0	0	0	0	0	0	0	0	0	0	0	0	0	1810 FrSh 1 T->-	0	0	0	0	0	0	0	0	0	0	0	0	0	0	0	0	0	0	0	0	0	0
YLR099C	ICT1	1185	0	0	0	0	0	0	0	0	0	0	0	0	0	0	0	0	0	0	0	0	0	0	0	0	0	0	0	0	0	0	0	0	0	0	0	0	0	0	0	0	0	0	0	0	0	0	0
YLR102C	APC9	798	0	717 FrSh 1 -->A	0	0	0	0	0	0	0	0	0	0	0	0	0	0	0	0	0	0	0	0	0	717 FrSh 1 -->A	0	0	0	0	0	0	0	0	0	0	0	0	0	0	0	0	0	0	0	0	0	0	0
YLR119W	SRN2	642	37 Stop 1 C->T	47 FrSh 2 A->-	47 FrSh 2 A->-	6 FrSh 1 -->A	47 FrSh 2 A->-	6 FrSh 1 -->A	6 FrSh 1 -->A	6 FrSh 1 -->A	47 FrSh 2 A->-	47 FrSh 2 A->-	6 FrSh 1 -->A	47 FrSh 2 A->-	37 Stop 1 C->T	6 FrSh 1 -->A	6 FrSh 1 -->A	6 FrSh 1 -->A	6 FrSh 1 -->A	47 FrSh 2 A->-	47 FrSh 2 A->-	47 FrSh 2 A->-	47 FrSh 2 A->-	47 FrSh 2 A->-	6 FrSh 1 -->A	47 FrSh 2 A->-	47 FrSh 2 A->-	6 FrSh 1 -->A	47 FrSh 2 A->-	47 FrSh 2 A->-	6 FrSh 1 -->A	6 FrSh 1 -->A	6 FrSh 1 -->A	6 FrSh 1 -->A	47 FrSh 2 A->-	6 FrSh 1 -->A	6 FrSh 1 -->A	6 FrSh 1 -->A	47 FrSh 2 A->-	47 FrSh 2 A->-	6 FrSh 1 -->A	6 FrSh 1 -->A	6 FrSh 1 -->A	6 FrSh 1 -->A	6 FrSh 1 -->A	6 FrSh 1 -->A	6 FrSh 1 -->A	6 FrSh 1 -->A	6 FrSh 1 -->A
YLR121C	YPS3	1527	110 FrSh 1 A->-	0	0	0	0	0	0	0	0	0	0	0	110 FrSh 1 A->-	0	0	0	0	0	0	0	0	0	0	0	0	0	0	0	0	0	0	0	0	0	0	0	0	0	0	0	0	0	0	0	0	0	0
YLR127C	APC2	2562	0	2556 FrSh 1 C->-	0	0	0	2556 FrSh 1 C->-	2556 FrSh 1 C->-	0	0	0	0	0	0	0	0	0	2556 FrSh 1 C->-	2556 FrSh 1 C->-	0	0	0	0	0	0	0	0	0	0	2556 FrSh 1 C->-	0	0	0	2556 FrSh 1 C->-	0	2556 FrSh 1 C->-	0	0	0	2556 FrSh 1 C->-	0	0	0	0	0	2556 FrSh 1 C->-	0	0
YLR130C	ZRT2	1269	0	0	0	0	0	0	0	0	0	0	0	1201 FrSh 1 -->A	0	0	0	0	0	0	0	0	0	0	0	0	0	0	0	0	0	0	0	0	0	0	0	0	0	0	0	0	0	0	0	0	0	0	0
YLR136C	TIS11	858	370 Stop 1 C->T	0	0	0	0	0	0	0	0	0	0	0	0	0	0	0	0	0	0	0	0	0	0	0	0	0	0	0	0	0	0	0	0	0	0	0	0	0	0	0	0	0	0	0	0	0	0
YLR138W	NHA1	2958	0	0	0	0	0	0	0	0	0	0	0	0	0	0	0	0	2920 Stop 1 A->T	0	0	0	0	0	0	0	0	0	0	0	0	0	0	0	0	0	0	0	0	0	0	0	0	0	0	0	0	0	0
YLR142W	PUT1	1431	0	0	0	0	0	0	0	1417 FrSh 1 -->A	0	0	0	0	0	0	0	0	0	0	0	0	0	0	0	0	0	0	0	0	1417 FrSh 1 -->A	0	0	0	0	0	0	0	0	0	0	0	0	0	0	0	0	0	0
YLR152C	YLR152C	1731	0	1489 FrSh 1 -->G	0	0	0	0	0	0	0	0	0	0	0	0	0	42 FrSh 1 -->A	0	0	0	0	0	0	0	0	0	0	0	42 FrSh 1 -->A	0	42 FrSh 1 -->A	42 FrSh 1 -->A	42 FrSh 1 -->A	0	0	0	0	0	0	0	42 FrSh 1 -->A	42 FrSh 1 -->A	0	0	0	0	0	42 FrSh 1 -->A
YLR164W	YLR164W	507	497 FrSh 1 -->A	0	497 FrSh 1 -->A	0	497 FrSh 1 -->A	0	0	0	497 FrSh 1 -->A	0	0	497 FrSh 1 -->A	497 FrSh 1 -->A	0	0	497 FrSh 1 -->A	497 FrSh 1 -->A	0	0	497 FrSh 1 -->A	497 FrSh 1 -->A	497 FrSh 1 -->A	0	497 FrSh 1 -->A	0	497 FrSh 1 -->A	497 FrSh 1 -->A	497 FrSh 1 -->A	497 FrSh 1 -->A	0	0	0	0	0	0	0	497 FrSh 1 -->A	497 FrSh 1 -->A	0	497 FrSh 1 -->A	497 FrSh 1 -->A	0	0	0	0	0	497 FrSh 1 -->A
YLR165C	PUS5	765	0	0	0	0	0	0	0	475 FrSh 1 G->-	0	0	0	0	0	0	0	0	0	0	0	0	0	0	0	0	0	0	0	0	0	0	0	0	0	0	0	0	0	0	0	0	0	0	0	0	0	0	0
YLR176C	RFX1	2436	24 FrSh 1 A->-	0	24 FrSh 1 A->-	24 FrSh 1 A->-	24 FrSh 1 A->-	24 FrSh 1 A->-	24 FrSh 1 A->-	24 FrSh 1 A->-	24 FrSh 1 A->-	24 FrSh 1 A->-	24 FrSh 1 A->-	24 FrSh 1 A->-	24 FrSh 1 A->-	24 FrSh 1 A->-	0	24 FrSh 1 A->-	24 FrSh 1 A->-	0	24 FrSh 1 A->-	24 FrSh 1 A->-	24 FrSh 1 A->-	24 FrSh 1 A->-	24 FrSh 1 A->-	24 FrSh 1 A->-	24 FrSh 1 A->-	24 FrSh 1 A->-	24 FrSh 1 A->-	24 FrSh 1 A->-	24 FrSh 1 A->-	24 FrSh 1 A->-	0	0	24 FrSh 1 A->-	24 FrSh 1 A->-	0	24 FrSh 1 A->-	24 FrSh 1 A->-	24 FrSh 1 A->-	24 FrSh 1 A->-	24 FrSh 1 A->-	24 FrSh 1 A->-	24 FrSh 1 A->-	24 FrSh 1 A->-	24 FrSh 1 A->-	24 FrSh 1 A->-	0	24 FrSh 1 A->-
YLR187W	SKG3	3081	0	2875 Stop 1 C->T	0	0	0	0	0	0	0	0	0	0	0	0	0	0	0	0	0	0	0	0	0	0	0	0	0	0	0	0	0	0	0	0	0	0	0	0	0	2875 Stop 1 C->T	0	0	0	0	0	0	0
YLR194C	YLR194C	765	0	0	0	0	0	0	0	0	0	0	0	0	0	0	0	0	0	0	0	0	0	0	0	0	0	0	0	0	0	0	0	0	0	0	0	0	0	0	0	0	0	0	0	0	0	0	0
YLR218C	COA4	453	0	0	0	0	0	0	0	0	0	0	0	0	0	0	0	83 FrSh 1 G->-	0	0	0	0	0	0	0	0	0	0	25 FrSh 1 -->T	0	0	0	25 FrSh 1 -->T	0	25 FrSh 1 -->T	0	0	0	0	0	0	0	0	0	0	0	0	0	0
YLR264C-A	YLR264C-A	117	0	0	0	0	50 FrSh 1 A->-	0	50 FrSh 1 A->-	0	0	0	55 FrSh 4 G->-	0	0	0	0	0	0	0	0	0	0	0	0	0	0	0	0	0	50 FrSh 1 -->A	0	0	0	50 FrSh 1 -->A	50 FrSh 1 A->-	0	0	0	0	0	0	0	0	55 FrSh 4 G->-	0	0	0	0
YLR266C	PDR8	2106	0	0	0	0	0	0	0	0	0	0	0	0	0	0	0	0	0	0	0	0	0	0	0	0	0	0	0	0	0	0	0	0	0	0	0	0	0	0	0	0	0	0	0	0	0	1528 Stop 1 C->T	0
YLR273C	PIG1	1947	0	0	0	0	0	0	0	0	0	0	0	0	0	0	0	0	0	0	0	0	0	0	0	0	0	0	0	0	0	0	1940 Stop 1 C->A	0	0	0	0	0	0	0	0	0	0	0	0	0	0	1673 FrSh 1 G->-	0
YLR285C-A	YLR285C-A	171	0	0	0	0	0	0	0	0	0	0	0	0	0	158 FrSh 5 -->A	0	0	0	0	0	0	0	0	0	0	0	0	0	0	0	0	0	0	0	0	0	0	0	0	0	0	0	158 FrSh 5 -->A	0	0	0	0	0
YLR286C	CTS1	1689	0	0	0	0	0	0	0	0	0	0	0	0	0	0	0	0	0	0	0	0	0	0	0	0	0	0	0	0	0	0	0	0	0	0	0	0	0	0	0	0	0	0	0	0	0	0	0
YLR300W	EXG1	1347	0	0	0	0	0	0	0	0	0	0	0	0	0	0	0	0	0	0	0	0	0	0	0	0	0	0	0	0	0	0	0	0	0	0	0	0	0	0	0	0	0	0	0	503 FrSh 1 T->-	0	0	0
YLR303W	MET17	1335	0	0	0	0	0	0	0	0	0	0	0	0	0	0	0	0	0	0	0	0	0	0	0	0	0	0	0	0	0	0	0	0	0	0	0	0	0	0	0	0	0	0	0	0	0	0	0
YLR312C	YLR312C	1197	0	0	0	0	0	0	0	0	0	0	0	0	0	0	0	0	0	0	0	0	0	0	0	0	0	0	0	0	0	0	0	0	0	1127 Stop 1 T->G	0	0	0	0	0	0	0	0	0	0	0	0	0
YLR313C	SPH1	1593	1580 FrSh 2 G->-	1580 FrSh 2 G->-	1580 FrSh 2 G->-	1580 FrSh 2 G->-	1580 FrSh 2 G->-	1580 FrSh 2 G->-	1580 FrSh 2 G->-	0	1580 FrSh 2 G->-	1580 FrSh 2 G->-	1580 FrSh 2 G->-	1580 FrSh 2 G->-	1580 FrSh 2 G->-	1580 FrSh 2 G->-	0	1580 FrSh 2 G->-	1580 FrSh 2 G->-	1580 FrSh 2 G->-	1580 FrSh 2 G->-	1580 FrSh 2 G->-	1580 FrSh 2 G->-	1580 FrSh 2 G->-	1580 FrSh 2 G->-	1580 FrSh 2 G->-	1580 FrSh 2 G->-	1580 FrSh 2 G->-	1580 FrSh 2 G->-	1580 FrSh 2 G->-	1580 FrSh 2 G->-	1580 FrSh 2 G->-	1580 FrSh 2 G->-	1580 FrSh 2 G->-	1580 FrSh 2 G->-	1580 FrSh 2 G->-	1580 FrSh 2 G->-	1580 FrSh 2 G->-	1580 FrSh 2 G->-	1580 FrSh 2 G->-	1580 FrSh 2 G->-	1580 FrSh 2 G->-	1580 FrSh 2 G->-	1580 FrSh 2 G->-	1580 FrSh 2 G->-	1580 FrSh 2 G->-	1580 FrSh 2 G->-	1580 FrSh 2 G->-	1580 FrSh 2 G->-
YLR318W	EST2	2655	2640 FrSh 4 A->-	2640 FrSh 2 A->-	2640 FrSh 2 A->-	0	2640 FrSh 2 A->-	2640 FrSh 2 A->-	2640 FrSh 2 A->-	0	2640 FrSh 4 A->-	2640 FrSh 4 A->-	0	2640 FrSh 4 A->-	2640 FrSh 2 A->-	2640 FrSh 2 A->-	0	2640 FrSh 4 A->-	2640 FrSh 4 A->-	2640 FrSh 4 A->-	2640 FrSh 4 A->-	2640 FrSh 4 A->-	2640 FrSh 4 A->-	2640 FrSh 4 A->-	0	2640 FrSh 2 A->-	2640 FrSh 2 A->-	2640 FrSh 2 A->-	2640 FrSh 4 A->-	2640 FrSh 2 A->-	2640 FrSh 2 A->-	2640 FrSh 2 A->-	2640 FrSh 4 -->A	0	2640 FrSh 4 A->-	2640 FrSh 2 A->-	2640 FrSh 2 A->-	0	2640 FrSh 2 A->-	2640 FrSh 4 A->-	2640 FrSh 2 A->-	2640 FrSh 4 A->-	2640 FrSh 4 A->-	2640 FrSh 2 A->-	0	0	2640 FrSh 2 -->A	2640 FrSh 2 -->A	2640 FrSh 4 A->-
YLR342W-A	YLR342W-A	174	105 FrSh 2 -->A	105 FrSh 2 -->A	105 FrSh 2 -->A	0	0	0	105 FrSh 2 -->A	0	105 FrSh 2 -->A	105 FrSh 2 -->A	105 FrSh 1 -->A	105 FrSh 1 -->A	105 FrSh 2 -->A	92 FrSh 2 -->T	0	0	105 FrSh 2 -->A	105 FrSh 2 -->A	105 FrSh 2 -->A	105 FrSh 2 -->A	105 FrSh 2 -->A	105 FrSh 2 -->A	105 FrSh 1 -->A	0	105 FrSh 2 -->A	0	0	105 FrSh 1 -->A	105 FrSh 2 -->A	0	0	0	105 FrSh 2 -->A	0	0	92 FrSh 2 -->T	105 FrSh 2 -->A	105 FrSh 2 -->A	105 FrSh 2 -->A	0	105 FrSh 2 -->A	92 FrSh 2 -->T	105 FrSh 1 -->A	105 FrSh 2 -->A	0	0	105 FrSh 2 -->A
YLR345W	YLR345W	1530	0	0	0	0	0	0	0	0	0	0	1520 Stop 1 T->G	0	0	0	0	0	0	0	0	0	0	0	0	0	0	0	0	0	0	0	0	0	0	0	0	0	0	0	0	0	0	0	1520 Stop 1 T->G	0	0	0	0
YLR346C	YLR346C	306	0	0	0	0	0	0	0	0	0	0	0	0	0	0	0	0	0	0	0	0	0	0	0	0	0	0	0	8 Stop 1 C->A	0	0	0	0	0	0	0	0	0	0	0	0	0	0	0	0	0	0	0
YLR369W	SSQ1	1974	0	0	1952 FrSh 1 -->A	0	0	0	0	0	0	0	0	1952 FrSh 1 -->A	1952 FrSh 1 -->A	0	0	0	0	0	0	1952 FrSh 1 -->A	0	1952 FrSh 1 -->A	0	0	0	0	0	0	0	0	0	0	0	0	0	0	0	0	0	0	0	0	0	0	0	0	0
YLR406C-A	YLR406C-A	150	112 FrSh 1 -->A	104 FrSh 7 C->-	112 FrSh 1 -->A	82 Stop 1 C->T	82 Stop 1 C->T	82 Stop 1 C->T	82 Stop 1 C->T	82 Stop 1 C->T	112 FrSh 1 -->A	112 FrSh 1 -->A	82 Stop 1 C->T	112 FrSh 1 -->A	97 FrSh 8 C->-	82 Stop 1 C->T	82 Stop 1 C->T	0	112 FrSh 1 -->A	82 Stop 1 C->T	112 FrSh 1 -->A	112 FrSh 1 -->A	82 Stop 1 C->T	112 FrSh 1 -->A	0	112 FrSh 1 -->A	112 FrSh 1 -->A	112 FrSh 1 -->A	82 Stop 1 C->T	82 Stop 1 C->T	82 Stop 1 C->T	82 Stop 1 C->T	82 Stop 1 C->T	82 Stop 1 C->T	111 FrSh 1 -->T	82 Stop 1 C->T	82 Stop 1 C->T	82 Stop 1 C->T	112 FrSh 1 -->A	112 FrSh 1 -->A	82 Stop 1 C->T	82 Stop 1 C->T	112 FrSh 1 -->A	82 Stop 1 C->T	82 Stop 1 C->T	82 Stop 1 C->T	112 FrSh 1 -->A	0	112 FrSh 1 -->A
YLR408C	BLS1	369	0	33 Stop 1 G->A	0	33 Stop 1 G->A	33 Stop 1 G->A	33 Stop 1 G->A	33 Stop 1 G->A	33 Stop 1 G->A	0	0	33 Stop 1 G->A	0	0	33 Stop 1 G->A	33 Stop 1 G->A	0	0	33 Stop 1 G->A	0	0	33 Stop 1 G->A	0	33 Stop 1 G->A	0	0	0	33 Stop 1 G->A	33 Stop 1 G->A	33 Stop 1 G->A	33 Stop 1 G->A	33 Stop 1 G->A	33 Stop 1 G->A	33 Stop 1 G->A	33 Stop 1 G->A	33 Stop 1 G->A	33 Stop 1 G->A	0	0	33 Stop 1 G->A	33 Stop 1 G->A	0	33 Stop 1 G->A	33 Stop 1 G->A	33 Stop 1 G->A	0	33 Stop 1 G->A	0
YLR414C	PUN1	792	0	0	0	0	0	0	0	0	0	0	0	0	541 FrSh 1 -->T	0	0	0	0	0	0	0	0	0	0	0	0	0	0	0	0	0	0	0	0	0	0	0	0	0	0	0	0	0	0	0	0	0	0
YLR415C	YLR415C	339	0	0	0	76 FrSh 2 -->C	76 FrSh 2 -->C	76 FrSh 1 -->C	76 FrSh 1 -->C	76 FrSh 1 -->C	0	0	76 FrSh 1 -->C	0	0	0	0	0	0	76 FrSh 1 -->C	0	0	0	0	0	0	0	0	76 FrSh 1 -->C	0	0	0	0	0	0	0	76 FrSh 1 -->C	0	0	0	76 FrSh 1 -->C	0	0	0	76 FrSh 1 -->C	0	76 FrSh 1 -->C	0	0
YLR424W	SPP382	2127	0	0	0	0	0	0	0	0	0	0	0	0	0	0	0	0	0	0	0	0	0	0	0	0	0	0	0	0	0	0	0	0	0	0	0	0	0	0	0	0	0	0	0	0	0	0	0
YLR446W	YLR446W	1302	0	0	0	0	0	0	0	0	0	0	0	0	0	0	0	0	0	0	0	0	0	0	0	1180 FrSh 8 -->T	0	0	0	0	0	804 FrSh 1 -->T	0	0	0	0	0	0	0	0	0	0	0	0	0	0	0	0	0
YLR450W	HMG2	3138	3115 FrSh 1 -->C	0	0	0	0	0	0	0	0	0	0	3125 Stop 1 C->G	3115 FrSh 1 -->C	0	0	0	0	0	0	0	0	0	0	0	0	0	0	3125 Stop 1 C->G	0	0	0	0	0	0	0	0	0	0	0	0	0	0	0	0	0	0	0
YML003W	YML003W	873	855 FrSh 1 -->T	855 FrSh 1 -->T	855 FrSh 1 -->T	855 FrSh 1 -->T	855 FrSh 1 -->T	855 FrSh 1 -->T	855 FrSh 1 -->T	855 FrSh 1 -->T	855 FrSh 1 -->T	855 FrSh 1 -->T	855 FrSh 1 -->T	855 FrSh 1 -->T	855 FrSh 1 -->T	855 FrSh 1 -->T	855 FrSh 1 -->T	855 FrSh 1 -->T	855 FrSh 1 -->T	855 FrSh 1 -->T	855 FrSh 1 -->T	855 FrSh 1 -->T	855 FrSh 1 -->T	855 FrSh 1 -->T	855 FrSh 1 -->T	855 FrSh 1 -->T	855 FrSh 1 -->T	855 FrSh 1 -->T	855 FrSh 1 -->T	855 FrSh 1 -->T	855 FrSh 1 -->T	855 FrSh 1 -->T	855 FrSh 1 -->T	855 FrSh 1 -->T	855 FrSh 1 -->T	855 FrSh 1 -->T	855 FrSh 1 -->T	855 FrSh 1 -->T	855 FrSh 1 -->T	855 FrSh 1 -->T	855 FrSh 1 -->T	855 FrSh 1 -->T	855 FrSh 1 -->T	855 FrSh 1 -->T	855 FrSh 1 -->T	855 FrSh 1 -->T	855 FrSh 1 -->T	855 FrSh 1 -->T	855 FrSh 1 -->T
YML006C	GIS4	2325	0	0	0	0	0	0	0	0	0	0	0	0	0	0	0	0	0	0	0	0	0	0	0	0	0	0	0	0	0	0	0	0	0	0	0	0	0	0	0	0	0	0	0	0	0	0	0
YML018C	YML018C	1182	0	0	0	0	0	0	1124 FrSh 1 A->-	0	0	0	0	0	0	0	0	0	0	0	0	0	0	0	0	0	0	0	0	0	0	0	0	0	0	0	0	0	0	0	0	0	0	0	0	0	0	0	0
YML052W	SUR7	909	0	0	0	0	0	0	0	0	0	0	0	0	0	0	0	874 Stop 1 A->T	0	0	0	0	0	0	0	0	0	0	0	0	0	0	0	0	0	0	0	0	0	0	0	0	0	0	0	0	0	0	0
YML054C-A	YML054C-A	159	0	0	0	0	0	0	0	0	0	0	0	0	0	0	0	0	0	0	0	0	0	0	0	0	0	0	0	0	0	0	0	0	0	61 FrSh 1 -->C	0	0	0	0	0	0	0	0	0	0	0	0	0
YML074C	FPR3	1236	0	0	0	0	0	0	0	0	0	0	0	0	0	0	0	0	572 FrSh 1 -->A	0	0	0	0	0	0	0	0	0	0	0	0	0	0	0	0	0	0	0	0	0	0	0	0	0	0	0	0	0	0
YML088W	UFO1	2007	0	0	0	0	0	0	0	0	0	0	0	0	0	0	0	1837 Stop 1 C->T	0	0	0	0	0	0	0	0	0	0	0	0	0	0	0	0	0	0	0	0	0	0	0	0	0	0	0	0	0	0	0
YML100W-A	YML100W-A	174	159 FrSh 1 -->C	159 FrSh 1 -->C	159 FrSh 1 -->C	159 FrSh 1 -->C	159 FrSh 1 -->C	159 FrSh 1 -->C	159 FrSh 1 -->C	159 FrSh 1 -->C	159 FrSh 1 -->C	159 FrSh 1 -->C	159 FrSh 1 -->C	159 FrSh 1 -->C	159 FrSh 1 -->C	159 FrSh 1 -->C	159 FrSh 1 -->C	159 FrSh 1 -->C	159 FrSh 1 -->C	159 FrSh 1 -->C	159 FrSh 1 -->C	159 FrSh 1 -->C	159 FrSh 1 -->C	159 FrSh 1 -->C	159 FrSh 1 -->C	159 FrSh 1 -->C	159 FrSh 1 -->C	159 FrSh 1 -->C	159 FrSh 1 -->C	159 FrSh 1 -->C	26 Stop 1 A->G	159 FrSh 1 -->C	159 FrSh 1 -->C	159 FrSh 1 -->C	159 FrSh 1 -->C	159 FrSh 1 -->C	159 FrSh 1 -->C	159 FrSh 1 -->C	159 FrSh 1 -->C	159 FrSh 1 -->C	159 FrSh 1 -->C	159 FrSh 1 -->C	159 FrSh 1 -->C	159 FrSh 1 -->C	159 FrSh 1 -->C	159 FrSh 1 -->C	159 FrSh 1 -->C	159 FrSh 1 -->C	159 FrSh 1 -->C
YML104C	MDM1	3384	0	0	894 FrSh 1 -->A	0	0	0	0	0	0	0	0	0	0	0	0	0	0	0	0	0	0	0	0	0	0	0	0	0	0	0	0	0	0	0	0	0	0	0	0	0	0	0	0	0	0	0	0
YML118W	NGL3	1518	0	0	0	1497 FrSh 2 -->A	0	0	0	1488 FrSh 1 T->-	1497 FrSh 2 -->A	1497 FrSh 5 -->A	0	1497 FrSh 4 -->A	0	0	0	0	0	1497 FrSh 4 -->A	1497 FrSh 4 -->A	1497 FrSh 4 -->A	1495 FrSh 2 -->G	1497 FrSh 5 -->A	0	0	1488 FrSh 2 -->G	1497 FrSh 4 -->A	0	0	0	0	1488 FrSh 1 T->-	0	1495 FrSh 1 -->G	1488 FrSh 1 T->-	0	1495 FrSh 1 -->G	0	0	0	0	1497 FrSh 2 -->A	0	0	1488 FrSh 2 -->G	0	0	0
YMR001C-A	YMR001C-A	231	0	0	0	0	0	0	0	0	0	0	0	0	0	0	0	0	0	0	0	0	0	0	0	0	0	0	0	0	0	0	0	0	0	0	0	0	0	0	0	0	0	0	0	0	0	0	0
YMR019W	STB4	2850	19 FrSh 1 -->A	19 FrSh 1 -->A	19 FrSh 1 -->A	19 FrSh 1 -->A	19 FrSh 1 -->A	19 FrSh 1 -->A	19 FrSh 1 -->A	19 FrSh 1 -->A	19 FrSh 1 -->A	19 FrSh 1 -->A	19 FrSh 1 -->A	19 FrSh 1 -->A	19 FrSh 1 -->A	19 FrSh 1 -->A	19 FrSh 1 -->A	19 FrSh 1 -->A	19 FrSh 1 -->A	0	19 FrSh 1 -->A	19 FrSh 1 -->A	19 FrSh 1 -->A	19 FrSh 1 -->A	19 FrSh 1 -->A	19 FrSh 1 -->A	0	19 FrSh 1 -->A	19 FrSh 1 -->A	19 FrSh 1 -->A	0	19 FrSh 1 -->A	19 FrSh 1 -->A	19 FrSh 1 -->A	19 FrSh 1 -->A	19 FrSh 1 -->A	19 FrSh 1 -->A	19 FrSh 1 -->A	19 FrSh 1 -->A	19 FrSh 1 -->A	19 FrSh 1 -->A	19 FrSh 1 -->A	19 FrSh 1 -->A	19 FrSh 1 -->A	19 FrSh 1 -->A	19 FrSh 1 -->A	19 FrSh 1 -->A	19 FrSh 1 -->A	19 FrSh 1 -->A
YMR030W-A	YMR030W-A	291	22 FrSh 1 -->C	174 FrSh 2 -->A	0	175 FrSh 1 G->-	174 FrSh 1 A->-	175 FrSh 1 G->-	175 FrSh 1 G->-	179 FrSh 1 T->-	0	0	175 FrSh 1 G->-	0	22 FrSh 1 -->C	175 FrSh 1 G->-	174 FrSh 2 -->A	0	175 FrSh 1 G->-	0	0	0	175 FrSh 1 G->-	0	0	0	0	0	0	179 FrSh 1 T->-	0	0	175 FrSh 1 G->-	175 FrSh 1 G->-	0	175 FrSh 2 G->-	175 FrSh 1 G->-	175 FrSh 1 G->-	0	0	175 FrSh 1 G->-	175 FrSh 1 G->-	0	175 FrSh 1 G->-	175 FrSh 1 G->-	175 FrSh 1 G->-	174 FrSh 1 A->-	175 FrSh 2 G->-	0
YMR030W	RSF1	1131	0	0	0	0	0	0	0	0	0	0	0	0	0	0	0	0	0	0	0	0	0	0	0	0	0	0	0	0	0	0	0	0	0	0	0	0	0	0	0	207 FrSh 1 -->A	0	0	0	0	0	0	207 FrSh 1 -->A
YMR084W	YMR084W	789	771 FrSh 2 -->C	771 FrSh 1 -->C	771 FrSh 1 -->C	771 FrSh 1 -->C	771 FrSh 1 -->C	771 FrSh 1 -->C	771 FrSh 1 -->C	771 FrSh 1 -->C	771 FrSh 1 -->C	771 FrSh 1 -->C	771 FrSh 1 -->C	771 FrSh 1 -->C	771 FrSh 2 -->C	770 FrSh 1 -->A	771 FrSh 1 -->C	771 FrSh 1 -->C	771 FrSh 1 -->C	771 FrSh 1 -->C	771 FrSh 1 -->C	771 FrSh 1 -->C	771 FrSh 1 -->C	771 FrSh 1 -->C	771 FrSh 1 -->C	771 FrSh 1 -->C	771 FrSh 1 -->C	771 FrSh 1 -->C	771 FrSh 1 -->C	771 FrSh 1 -->C	771 FrSh 1 -->C	771 FrSh 1 -->C	0	0	771 FrSh 1 -->C	771 FrSh 1 -->C	771 FrSh 1 -->C	771 FrSh 1 -->C	771 FrSh 1 -->C	771 FrSh 1 -->C	771 FrSh 1 -->C	770 FrSh 1 -->A	771 FrSh 1 -->C	770 FrSh 1 -->A	771 FrSh 1 -->C	771 FrSh 1 -->C	771 FrSh 1 -->C	771 FrSh 1 -->C	771 FrSh 1 -->C
YMR095C	SNO1	675	0	0	0	0	0	0	0	0	0	0	0	0	0	0	0	0	0	0	0	0	0	0	0	0	0	0	0	0	0	0	639 FrSh 1 T->-	0	0	0	0	0	0	0	0	0	0	0	0	0	0	0	0
YMR096W	SNZ1	894	0	0	0	0	0	0	0	0	0	0	0	0	0	0	0	0	0	0	0	0	0	0	0	0	0	0	0	0	0	0	0	0	0	0	0	0	0	0	0	0	0	0	0	0	0	0	0
YMR097C	MTG1	1104	0	0	0	0	0	0	0	0	0	0	1071 FrSh 1 C->-	0	0	0	0	0	0	0	0	0	0	0	0	0	0	0	0	0	0	0	0	0	0	0	0	0	0	0	0	0	0	0	1071 FrSh 1 C->-	0	0	0	0
YMR105W-A	YMR105W-A	195	0	187 FrSh 1 T->-	0	0	0	0	0	0	0	0	0	0	0	0	0	0	0	0	0	0	0	0	0	0	0	187 FrSh 1 T->-	0	187 FrSh 1 T->-	0	0	0	0	0	187 FrSh 1 -->T	187 FrSh 1 T->-	0	0	0	0	187 FrSh 1 T->-	187 FrSh 1 T->-	0	0	0	187 FrSh 1 T->-	187 FrSh 1 T->-	0
YMR110C	HFD1	1599	0	0	0	0	0	0	0	0	0	0	0	0	0	0	0	0	0	0	0	0	0	0	0	0	0	0	0	0	0	0	0	0	0	0	0	0	0	0	0	0	0	0	0	0	0	0	0
YMR128W	ECM16	3804	0	0	0	0	0	0	0	0	0	0	0	0	0	0	0	0	0	0	0	0	0	0	0	0	0	0	0	0	0	0	0	0	0	0	0	0	0	0	0	0	0	0	0	0	0	0	0
YMR136W	GAT2	1683	259 FrSh 1 -->A	0	0	0	259 FrSh 1 -->A	0	0	0	0	0	0	0	259 FrSh 1 -->A	0	0	0	0	0	0	0	0	0	0	1454 FrSh 1 -->A	0	0	0	0	0	0	0	0	0	0	0	0	0	0	0	0	0	0	0	0	0	0	0
YMR140W	SIP5	1470	0	1437 FrSh 1 -->G	0	0	0	1437 FrSh 1 -->G	0	0	0	0	0	0	0	0	0	0	0	0	0	0	0	0	0	0	0	0	0	0	0	0	0	0	0	0	0	0	0	0	0	0	0	0	0	0	0	0	0
YMR152W	YIM1	1098	993 Stop 1 T->A	0	0	0	0	0	0	0	0	0	0	0	993 Stop 1 T->A	0	0	0	0	0	0	0	0	0	0	0	0	0	0	0	0	0	0	0	0	0	0	0	0	0	0	0	0	0	0	0	0	0	0
YMR159C	ATG16	453	0	0	0	0	0	0	0	0	0	0	0	0	0	0	0	0	0	0	0	0	0	0	0	0	0	0	0	0	0	0	0	0	0	0	0	0	0	0	0	33 FrSh 1 -->A	0	0	0	0	0	0	0
YMR160W	YMR160W	2451	0	0	0	0	0	0	0	0	0	0	0	0	0	0	0	0	0	0	0	0	0	0	0	0	0	0	0	0	0	0	0	0	0	0	0	0	0	0	0	0	0	0	0	0	0	0	0
YMR175W-A	YMR175W-A	195	22 FrSh 4 -->T	22 FrSh 4 -->T	0	0	22 FrSh 4 -->T	0	22 FrSh 4 -->T	22 FrSh 4 -->T	0	22 FrSh 4 -->T	22 FrSh 4 -->T	22 FrSh 4 -->T	22 FrSh 4 -->T	22 FrSh 4 -->T	0	22 FrSh 4 -->T	0	0	0	22 FrSh 4 -->T	22 FrSh 4 -->T	0	169 Stop 1 C->T	22 FrSh 4 -->T	0	22 FrSh 4 -->T	0	22 FrSh 4 -->T	0	0	22 FrSh 4 -->T	23 FrSh 1 -->G	22 FrSh 4 -->T	22 FrSh 4 -->T	22 FrSh 4 -->T	22 FrSh 4 -->T	0	0	22 FrSh 4 -->T	22 FrSh 4 -->T	22 FrSh 4 -->T	22 FrSh 4 -->T	22 FrSh 4 -->T	22 FrSh 4 -->T	22 FrSh 4 -->T	22 FrSh 4 -->T	0
YMR176W	ECM5	4236	0	0	0	0	0	0	0	0	0	0	0	0	0	0	0	0	0	0	0	0	0	0	0	0	0	0	0	0	0	0	0	692 FrSh 1 G->-	0	0	0	0	0	0	0	0	0	0	0	0	0	0	0
YMR180C	CTL1	963	0	0	0	670 Stop 1 G->T	0	0	0	0	0	670 Stop 1 G->T	0	0	670 Stop 1 G->T	0	0	0	670 Stop 1 G->T	670 Stop 1 G->T	0	0	0	0	0	0	0	670 Stop 1 G->T	0	0	0	0	0	0	0	0	0	0	0	0	0	0	0	0	0	0	0	0	0
YMR192W	GYL1	2163	0	0	0	0	655 Stop 1 C->T	0	655 Stop 1 C->T	0	0	0	0	0	0	0	0	0	0	0	0	0	0	0	0	0	0	0	0	0	0	0	0	0	0	0	0	0	0	0	0	0	0	0	0	0	0	0	0
YMR199W	CLN1	1641	0	0	0	0	0	0	0	0	0	0	0	0	0	0	0	0	0	0	0	0	0	0	0	0	0	0	0	0	0	0	0	0	0	0	0	0	0	0	0	0	0	0	0	0	0	0	0
YMR204C	INP1	1263	0	0	0	0	0	0	0	0	0	0	0	0	0	0	0	0	0	0	0	574 Stop 1 C->T	0	0	0	0	0	0	0	0	0	0	0	0	0	0	0	0	0	0	0	0	0	0	0	0	0	0	0
YMR209C	YMR209C	1374	0	0	0	0	0	0	0	0	0	0	0	0	0	0	0	0	0	0	0	0	0	0	0	0	0	0	0	0	0	0	0	0	0	0	0	0	0	0	0	0	0	0	0	0	0	0	0
YMR215W	GAS3	1575	147 FrSh 1 -->T	0	0	0	0	0	0	0	0	0	0	0	147 FrSh 1 -->T	0	0	0	0	0	0	0	0	0	0	0	0	0	0	0	0	0	0	0	0	0	0	0	0	0	0	0	0	0	0	0	0	0	147 FrSh 1 T->-
YMR216C	SKY1	2229	0	0	0	0	2218 Stop 1 A->T	0	0	0	0	0	0	0	0	0	0	0	0	0	0	0	0	0	0	0	0	0	0	0	0	0	0	0	0	0	0	0	0	0	0	0	0	0	0	0	0	0	0
YMR230W-A	YMR230W-A	189	0	0	0	0	0	0	0	0	0	0	0	0	0	0	0	0	0	0	0	0	0	0	0	0	0	0	0	0	162 Stop 1 T->A	0	0	0	0	0	0	0	0	0	0	0	0	0	0	0	0	0	0
YMR233W	TRI1	681	0	0	0	0	0	0	0	0	0	0	0	0	0	663 FrSh 1 T->-	0	0	0	663 FrSh 1 T->-	0	0	0	0	0	0	0	0	0	0	0	0	663 FrSh 1 T->-	663 FrSh 1 T->-	0	0	663 FrSh 1 T->-	663 FrSh 1 T->-	0	0	0	663 FrSh 1 T->-	663 FrSh 1 T->-	663 FrSh 1 T->-	0	663 FrSh 1 T->-	0	0	0
YMR251W	GTO3	1101	0	0	0	0	0	0	0	0	0	0	0	0	0	0	0	0	0	0	0	0	0	0	0	0	0	0	0	0	0	0	0	0	0	0	0	0	0	0	0	0	0	0	0	0	0	0	0
YMR265C	YMR265C	1386	0	0	0	0	0	0	0	0	0	0	0	0	0	0	0	0	0	0	0	0	0	0	0	0	0	0	0	0	0	0	0	0	0	0	0	0	0	0	0	0	0	0	0	0	0	0	0
YMR271C	URA10	684	0	0	0	0	0	0	0	0	0	0	0	0	0	0	0	0	0	0	0	0	0	0	0	0	0	0	0	0	0	0	0	0	0	0	0	0	0	0	0	0	0	0	0	0	0	0	0
YMR279C	YMR279C	1623	0	0	0	0	0	0	0	0	0	0	0	0	0	0	0	0	0	0	0	0	0	0	0	0	0	0	0	0	0	0	0	0	0	0	0	0	0	0	0	0	0	0	0	0	0	1593 FrSh 2 A->-	0
YMR316W	DIA1	1011	0	0	0	0	0	0	0	0	0	0	0	0	0	0	0	0	0	0	0	0	0	0	0	0	0	0	0	0	0	0	0	0	0	0	0	0	0	0	0	0	0	0	0	0	0	0	0
YNL020C	ARK1	1917	0	0	0	0	0	0	0	0	0	0	0	0	0	0	0	0	0	0	0	0	0	0	0	0	0	0	0	0	0	0	0	0	0	0	0	0	0	0	0	0	0	0	0	0	0	0	0
YNL040W	YNL040W	1371	0	0	0	0	0	0	0	0	0	0	0	0	0	0	0	0	0	0	0	0	0	0	0	0	0	0	0	0	0	0	0	0	0	0	0	0	0	0	0	0	0	0	0	0	0	0	0
YNL045W	LAP2	2016	0	0	0	0	0	0	0	0	0	0	0	0	0	0	0	0	0	0	0	0	0	0	0	0	0	0	0	110 FrSh 1 -->C	0	0	0	0	0	0	0	0	0	0	0	0	0	0	0	0	0	0	0
YNL067W-B	YNL067W-B	141	0	90 FrSh 1 -->T	0	90 FrSh 1 -->T	90 FrSh 1 -->T	90 FrSh 1 -->T	90 FrSh 1 -->T	90 FrSh 1 -->T	0	0	82 FrSh 1 -->A	0	0	90 FrSh 1 -->T	0	0	0	90 FrSh 1 -->T	0	0	0	0	90 FrSh 1 -->T	0	0	0	90 FrSh 2 -->T	90 FrSh 1 -->T	90 FrSh 2 -->T	0	85 FrSh 4 -->T	85 FrSh 4 -->T	90 FrSh 1 -->T	90 FrSh 1 -->T	0	90 FrSh 1 -->T	0	0	83 FrSh 4 -->T	0	0	90 FrSh 1 -->T	82 FrSh 1 -->A	90 FrSh 1 -->T	0	0	0
YNL074C	MLF3	1359	0	0	6 Stop 1 C->A	0	0	0	0	0	0	0	0	0	0	0	0	0	0	0	0	0	0	0	0	0	0	0	0	0	0	0	0	0	0	0	0	0	0	0	0	0	0	0	0	0	0	0	0
YNL083W	SAL1	1485	1208 FrSh 1 G->-	1208 FrSh 1 G->-	1208 FrSh 1 G->-	1208 FrSh 1 G->-	1208 FrSh 1 G->-	1208 FrSh 1 G->-	1208 FrSh 1 G->-	1208 FrSh 1 G->-	1208 FrSh 1 G->-	1208 FrSh 1 G->-	1208 FrSh 1 G->-	1208 FrSh 1 G->-	1208 FrSh 1 G->-	1208 FrSh 1 G->-	1208 FrSh 1 G->-	1208 FrSh 1 G->-	1208 FrSh 1 G->-	1208 FrSh 1 G->-	1208 FrSh 1 G->-	1208 FrSh 1 G->-	1208 FrSh 1 G->-	1208 FrSh 1 G->-	1208 FrSh 1 G->-	1208 FrSh 1 G->-	1208 FrSh 1 G->-	1208 FrSh 1 G->-	1208 FrSh 1 G->-	1208 FrSh 1 G->-	1208 FrSh 1 G->-	1208 FrSh 1 G->-	1208 FrSh 1 G->-	1208 FrSh 1 G->-	1208 FrSh 1 G->-	1208 FrSh 1 G->-	1208 FrSh 1 G->-	1208 FrSh 1 G->-	1208 FrSh 1 G->-	1208 FrSh 1 G->-	1208 FrSh 1 G->-	1208 FrSh 1 G->-	1208 FrSh 1 G->-	1208 FrSh 1 G->-	1208 FrSh 1 G->-	1208 FrSh 1 G->-	1208 FrSh 1 G->-	1208 FrSh 1 G->-	1208 FrSh 1 G->-
YNL087W	TCB2	3537	0	0	0	0	2785 FrSh 1 T->-	2785 FrSh 1 T->-	2785 FrSh 1 T->-	2496 FrSh 1 A->-	0	0	0	0	0	0	1297 FrSh 1 -->T	0	0	0	0	0	0	0	0	0	0	0	0	0	0	0	0	0	0	0	0	0	0	0	0	0	0	0	0	0	0	0	0
YNL092W	YNL092W	1203	0	0	0	0	0	0	0	0	0	0	0	0	0	0	0	0	0	0	0	0	0	0	0	0	0	0	0	0	0	0	0	0	0	0	0	0	0	0	0	0	0	0	0	0	0	0	0
YNL095C	YNL095C	1929	0	0	0	0	0	0	0	0	0	0	0	0	0	0	0	0	0	0	0	486 FrSh 1 -->G	0	0	0	0	0	0	0	0	0	0	0	0	0	0	0	0	0	0	0	0	0	0	0	0	0	0	0
YNL097C-B	YNL097C-B	123	0	0	0	76 FrSh 10 T->-	0	76 FrSh 10 T->-	76 FrSh 10 T->-	0	0	0	0	0	0	0	0	0	0	0	0	0	0	0	0	0	0	0	0	0	0	0	55 Stop 1 C->T	55 Stop 1 C->T	76 FrSh 10 T->-	0	55 Stop 1 C->T	0	0	0	0	0	0	0	0	0	0	0	0
YNL100W	AIM37	705	0	0	0	0	0	0	0	0	0	0	0	0	0	0	0	0	0	0	0	0	0	0	0	0	0	0	0	0	0	0	0	0	0	0	0	0	0	0	0	0	0	0	0	0	0	0	0
YNL103W	MET4	2019	0	0	0	0	0	0	0	0	0	0	0	1971 FrSh 1 -->A	0	0	0	0	0	0	0	0	0	0	0	0	0	0	0	0	0	0	0	0	0	0	0	0	0	0	0	0	0	0	0	0	0	0	0
YNL116W	DMA2	1569	0	0	0	0	0	0	0	1532 Stop 1 T->G	0	0	0	0	0	0	1532 Stop 1 T->G	1532 Stop 1 T->G	0	1532 Stop 1 T->G	0	0	0	0	0	0	0	0	0	0	0	0	0	0	0	0	1532 Stop 1 T->G	0	0	0	0	0	0	0	0	0	0	0	0
YNL118C	DCP2	2913	0	2873 Stop 1 C->A	0	0	0	0	0	0	0	0	0	0	0	0	0	0	0	0	0	0	0	0	0	0	0	0	0	0	0	0	0	0	0	0	0	0	0	0	0	0	0	0	0	0	0	0	0
YNL123W	NMA111	2994	0	0	0	0	0	0	0	0	0	0	0	0	0	0	0	0	0	0	0	0	0	0	0	0	0	0	0	0	0	0	0	0	2980 Stop 1 C->T	0	0	0	0	0	0	0	0	0	0	0	0	0	0
YNL125C	ESBP6	2022	0	0	0	0	0	0	0	0	0	0	0	621 FrSh 1 -->C	0	0	0	0	0	0	0	0	0	0	0	0	0	0	621 FrSh 1 -->C	0	621 FrSh 1 -->C	0	0	0	0	0	0	0	0	0	0	0	0	0	0	0	0	0	0
YNL146C-A	YNL146C-A	195	0	0	0	0	0	0	0	0	0	0	0	0	0	10 FrSh 1 G->-	0	0	0	0	0	0	0	0	0	0	0	68 FrSh 1 -->A	61 FrSh 1 -->C	61 FrSh 1 -->C	0	0	68 FrSh 1 -->A	68 FrSh 1 -->A	0	0	68 FrSh 1 A->-	0	0	0	68 FrSh 2 -->A	0	0	10 FrSh 1 G->-	0	0	0	0	0
YNL148C	ALF1	765	0	0	0	0	0	0	0	0	0	0	0	0	0	0	0	0	0	0	0	0	0	0	0	0	0	0	0	0	0	0	0	0	0	0	0	0	0	0	0	0	0	0	0	0	0	0	0
YNL157W	IGO1	507	0	0	0	0	0	0	0	0	0	0	0	0	0	0	0	0	0	0	0	0	0	0	0	0	0	0	0	0	0	0	0	0	0	0	0	0	0	0	498 FrSh 1 -->C	0	0	0	0	0	0	0	0
YNL159C	ASI2	870	0	0	0	0	0	0	0	0	0	0	0	0	0	0	0	0	0	0	0	0	0	0	0	0	0	0	0	0	0	0	0	0	0	0	0	0	0	0	0	0	0	0	0	0	0	0	0
YNL175C	NOP13	1212	0	0	0	0	0	0	0	0	0	0	0	0	0	0	0	0	0	0	0	0	0	0	0	0	0	0	0	0	0	0	0	0	0	0	0	0	0	0	0	0	0	0	0	0	0	0	0
YNL193W	YNL193W	1677	0	0	0	0	0	0	0	0	0	0	0	0	0	0	0	0	0	0	0	0	0	0	0	0	0	0	0	263 FrSh 1 -->T	0	0	0	0	0	0	0	0	0	0	0	0	0	0	0	0	0	0	0
YNL194C	YNL194C	906	283 FrSh 1 -->C	0	0	0	0	0	0	0	0	0	0	0	283 FrSh 1 -->C	0	0	0	0	0	0	0	0	0	0	0	0	0	0	0	0	0	876 Stop 1 T->A	876 Stop 1 T->A	0	0	0	0	0	0	0	0	0	0	0	0	0	0	0
YNL195C	YNL195C	786	0	0	0	0	0	0	0	0	0	0	0	0	0	0	0	0	0	0	0	0	0	0	0	0	0	0	0	0	0	0	0	0	0	0	248 FrSh 1 A->-	0	0	0	0	0	0	0	0	0	0	0	0
YNL196C	SLZ1	897	0	0	0	0	0	0	0	0	0	0	0	0	0	0	0	0	0	0	0	0	0	0	0	200 FrSh 1 -->A	0	0	0	0	0	0	0	0	0	0	0	0	0	0	0	0	0	0	0	0	0	0	0
YNL239W	LAP3	1365	0	0	0	1094 FrSh 4 -->G	1094 FrSh 4 -->G	0	0	0	0	0	0	0	0	0	0	0	0	0	0	0	0	0	0	1094 FrSh 4 -->G	0	1094 FrSh 4 -->G	1094 FrSh 4 -->G	0	0	0	0	0	0	0	1094 FrSh 4 -->G	0	0	0	0	0	0	0	0	0	0	0	0
YNL249C	MPA43	1629	0	0	0	1617 FrSh 1 T->-	1617 FrSh 1 T->-	1617 FrSh 1 T->-	1617 FrSh 1 T->-	1617 FrSh 1 T->-	0	0	1617 FrSh 1 T->-	1617 FrSh 1 T->-	0	1617 FrSh 1 T->-	0	0	0	0	0	0	1617 FrSh 1 T->-	0	1617 FrSh 1 T->-	1617 FrSh 1 T->-	0	1617 FrSh 1 T->-	1617 FrSh 1 T->-	0	1617 FrSh 1 T->-	0	1617 FrSh 1 T->-	1617 FrSh 1 T->-	1617 FrSh 1 T->-	1617 FrSh 1 T->-	1617 FrSh 1 T->-	1617 FrSh 1 T->-	0	0	1617 FrSh 1 T->-	1617 FrSh 1 T->-	1617 FrSh 1 T->-	1617 FrSh 1 T->-	1617 FrSh 1 T->-	1617 FrSh 1 T->-	1617 FrSh 1 T->-	1617 FrSh 1 T->-	1617 FrSh 1 T->-
YNL260C	YNL260C	597	38 FrSh 1 A->-	0	0	34 Stop 1 A->T	34 Stop 1 A->T	34 Stop 1 A->T	34 Stop 1 A->T	34 Stop 1 A->T	38 FrSh 1 A->-	0	34 Stop 1 A->T	34 Stop 1 A->T	38 FrSh 1 A->-	34 Stop 1 A->T	0	38 FrSh 1 A->-	38 FrSh 1 A->-	38 FrSh 1 A->-	0	0	34 Stop 1 A->T	38 FrSh 1 A->-	34 Stop 1 A->T	0	38 FrSh 1 A->-	0	38 FrSh 1 A->-	34 Stop 1 A->T	34 Stop 1 A->T	38 FrSh 1 A->-	34 Stop 1 A->T	34 Stop 1 A->T	34 Stop 1 A->T	34 Stop 1 A->T	34 Stop 1 A->T	34 Stop 1 A->T	38 FrSh 1 A->-	0	34 Stop 1 A->T	34 Stop 1 A->T	34 Stop 1 A->T	34 Stop 1 A->T	34 Stop 1 A->T	34 Stop 1 A->T	34 Stop 1 A->T	34 Stop 1 A->T	38 FrSh 1 A->-
YNL269W	BSC4	396	0	0	0	364 FrSh 1 A->-	0	0	0	364 FrSh 1 A->-	0	0	35 FrSh 1 -->A	0	0	35 FrSh 1 -->A	0	364 FrSh 1 A->-	364 FrSh 1 A->-	0	0	0	35 FrSh 1 -->A	0	35 FrSh 1 -->A	35 FrSh 1 -->A	0	364 FrSh 1 A->-	0	0	364 FrSh 1 A->-	0	364 FrSh 1 A->-	364 FrSh 1 A->-	0	166 Stop 1 A->T	364 FrSh 1 A->-	35 FrSh 1 -->A	0	0	364 FrSh 1 A->-	35 FrSh 1 -->A	35 FrSh 1 -->A	35 FrSh 1 -->A	35 FrSh 1 -->A	364 FrSh 1 A->-	364 FrSh 1 A->-	35 FrSh 1 -->A	365 FrSh 1 T->-
YNL275W	BOR1	1731	0	0	0	0	0	0	0	0	0	0	0	0	0	0	1311 FrSh 1 -->G	0	0	0	0	0	0	0	0	0	0	0	0	0	0	0	0	0	0	0	0	0	0	0	0	0	0	0	0	0	0	0	0
YNL277W-A	YNL277W-A	189	0	0	0	80 FrSh 1 G->-	0	0	0	105 FrSh 1 -->A	0	0	0	0	0	105 FrSh 1 -->A	105 FrSh 1 -->A	105 FrSh 1 -->A	105 FrSh 1 -->A	105 FrSh 1 A->-	0	0	105 FrSh 2 -->A	0	80 FrSh 1 G->-	105 FrSh 1 -->A	0	0	0	0	0	0	0	0	0	90 FrSh 1 -->A	105 FrSh 1 -->A	80 FrSh 1 G->-	0	0	101 FrSh 1 -->T	105 FrSh 1 -->A	0	105 FrSh 1 -->A	0	80 FrSh 1 G->-	105 FrSh 1 -->A	80 FrSh 1 G->-	105 FrSh 1 A->-
YNL279W	PRM1	1986	0	0	0	0	0	0	0	0	0	0	0	0	0	0	0	0	0	0	0	0	0	0	0	0	0	0	0	0	0	0	0	0	0	0	0	0	0	0	0	0	0	0	0	0	0	0	0
YNL282W	POP3	588	0	0	0	0	0	0	0	0	0	0	0	0	0	0	0	0	0	0	0	0	0	0	0	0	0	0	0	0	0	0	0	0	0	0	0	0	0	0	0	0	0	0	0	0	0	0	584 FrSh 1 A->-
YNL283C	WSC2	1512	0	0	0	0	0	0	0	0	0	0	0	0	0	0	0	0	0	0	0	0	0	0	0	0	0	0	0	0	0	0	0	0	0	0	0	0	0	0	0	0	0	0	0	0	0	0	0
YNR017W	TIM23	669	0	0	0	0	0	0	0	0	0	0	0	0	0	0	0	0	0	0	0	0	0	0	0	0	0	0	0	0	0	0	0	0	0	0	0	0	0	0	0	0	0	0	0	0	0	661 Stop 1 G->T	0
YNR020C	ATP23	813	121 FrSh 1 T->-	121 FrSh 1 T->-	121 FrSh 1 T->-	121 FrSh 1 T->-	121 FrSh 1 T->-	121 FrSh 1 T->-	121 FrSh 1 T->-	108 FrSh 2 T->-	121 FrSh 1 T->-	121 FrSh 1 T->-	108 FrSh 2 T->-	121 FrSh 1 T->-	121 FrSh 1 T->-	110 FrSh 4 T->-	121 FrSh 1 T->-	108 FrSh 2 T->-	121 FrSh 1 T->-	121 FrSh 2 -->T	121 FrSh 1 T->-	121 FrSh 1 T->-	108 FrSh 2 T->-	121 FrSh 1 T->-	0	121 FrSh 1 T->-	121 FrSh 1 T->-	121 FrSh 1 T->-	121 FrSh 1 T->-	121 FrSh 1 T->-	121 FrSh 1 T->-	121 FrSh 1 T->-	108 FrSh 2 T->-	108 FrSh 2 T->-	0	0	0	110 FrSh 4 T->-	121 FrSh 1 T->-	121 FrSh 1 T->-	108 FrSh 2 T->-	121 FrSh 1 T->-	121 FrSh 1 T->-	110 FrSh 4 T->-	108 FrSh 2 T->-	0	121 FrSh 2 -->T	0	121 FrSh 1 T->-
YNR022C	MRPL50	420	0	0	0	0	0	0	0	0	0	0	0	0	0	0	0	0	0	0	0	0	0	0	0	0	0	0	0	0	0	0	0	0	0	0	0	0	336 FrSh 2 A->-	0	0	0	0	0	0	0	0	0	0
YNR024W	MPP6	561	0	0	0	0	0	0	0	0	0	0	0	0	0	0	0	0	0	0	0	0	0	0	0	0	0	0	0	0	0	0	0	0	0	0	0	0	0	0	0	0	0	0	0	0	0	0	0
YNR056C	BIO5	1686	0	0	0	0	53 FrSh 1 T->-	0	0	53 FrSh 1 T->-	0	0	53 FrSh 1 T->-	0	0	53 FrSh 1 T->-	0	53 FrSh 1 T->-	0	0	0	0	53 FrSh 1 T->-	0	53 FrSh 1 T->-	0	0	0	0	0	53 FrSh 1 T->-	0	53 FrSh 1 T->-	53 FrSh 1 T->-	53 FrSh 1 T->-	53 FrSh 1 T->-	53 FrSh 1 T->-	53 FrSh 1 T->-	0	0	53 FrSh 1 T->-	53 FrSh 1 T->-	0	53 FrSh 1 T->-	53 FrSh 1 T->-	53 FrSh 1 T->-	53 FrSh 1 T->-	53 FrSh 1 T->-	0
YNR057C	BIO4	714	0	0	0	0	0	0	0	0	0	0	0	0	0	0	0	504 Stop 1 G->A	0	0	0	0	0	0	0	0	0	0	0	0	504 Stop 1 G->A	0	0	0	0	0	0	0	0	0	0	0	0	0	0	0	0	0	0
YNR059W	MNT4	1743	231 Stop 1 G->A	0	0	0	0	0	0	0	0	0	0	0	0	0	0	0	0	0	0	0	0	0	0	0	0	0	0	0	0	0	0	0	0	0	0	0	0	0	0	0	0	0	0	0	0	0	0
YNR060W	FRE4	2160	0	0	0	0	0	0	0	0	0	0	0	0	0	0	1822 FrSh 1 -->A	0	0	0	0	0	0	0	0	0	0	0	0	0	0	0	0	0	0	0	0	0	0	0	0	0	0	0	0	0	0	0	0
YNR061C	YNR061C	660	0	0	0	0	0	0	0	0	0	0	0	0	0	0	0	0	0	0	0	0	0	0	0	0	0	0	0	0	0	353 FrSh 1 -->T	0	0	0	0	0	0	353 FrSh 1 -->T	353 FrSh 1 -->T	0	0	0	0	0	0	0	0	0
YNR062C	YNR062C	984	0	0	0	0	0	0	0	0	0	0	0	0	0	0	0	0	0	0	0	0	0	0	0	0	0	0	0	0	0	0	0	0	0	0	0	0	0	0	0	0	0	0	0	0	0	0	0
YNR064C	YNR064C	873	40 Stop 1 C->T	0	0	0	0	0	0	0	0	0	0	0	0	0	0	0	0	0	0	0	0	0	0	0	0	0	0	0	0	0	0	0	0	0	0	0	0	0	0	0	0	0	0	0	0	0	0
YOL004W	SIN3	4611	0	0	4597 FrSh 1 -->G	0	0	0	0	0	0	0	0	0	0	0	0	0	0	0	0	4597 FrSh 1 -->G	0	0	0	0	0	4447 FrSh 1 -->T	0	0	0	0	0	0	0	0	0	0	0	0	0	0	0	0	0	0	0	0	0
YOL012C	HTZ1	405	0	0	0	0	0	0	0	0	0	0	0	0	389 FrSh 1 -->A	0	0	0	0	0	0	0	0	0	0	0	0	0	0	0	0	0	0	0	0	0	0	0	0	0	0	0	0	0	0	0	0	0	0
YOL014W	YOL014W	375	22 FrSh 1 T->-	0	22 FrSh 1 T->-	22 FrSh 1 T->-	22 FrSh 1 T->-	22 FrSh 1 T->-	22 FrSh 1 T->-	22 FrSh 1 T->-	22 FrSh 1 T->-	22 FrSh 1 T->-	90 Stop 1 G->A	22 FrSh 1 T->-	287 FrSh 2 -->A	22 FrSh 1 T->-	22 FrSh 1 T->-	22 FrSh 1 T->-	22 FrSh 1 T->-	22 FrSh 1 T->-	22 FrSh 1 T->-	22 FrSh 1 T->-	22 FrSh 1 T->-	22 FrSh 1 T->-	22 FrSh 1 T->-	22 FrSh 1 T->-	22 FrSh 1 T->-	0	22 FrSh 1 T->-	22 FrSh 1 T->-	22 FrSh 1 T->-	22 FrSh 1 T->-	22 FrSh 1 T->-	22 FrSh 1 T->-	22 FrSh 1 T->-	22 FrSh 1 T->-	22 FrSh 1 T->-	22 FrSh 1 T->-	22 FrSh 1 T->-	22 FrSh 1 T->-	22 FrSh 1 T->-	22 FrSh 1 T->-	22 FrSh 1 T->-	22 FrSh 1 T->-	90 Stop 1 G->A	22 FrSh 1 T->-	22 FrSh 1 T->-	183 Stop 1 G->A	0
YOL019W-A	YOL019W-A	153	27 FrSh 2 -->A	0	0	0	0	0	0	0	0	0	0	0	27 FrSh 2 -->A	0	0	0	0	0	0	0	0	0	0	0	0	0	0	0	0	0	36 Stop 1 G->A	36 Stop 1 G->A	0	0	0	0	0	0	0	0	0	0	0	0	0	0	0
YOL019W	YOL019W	1656	0	0	0	0	0	0	0	0	0	0	0	0	0	0	1577 FrSh 1 C->-	0	0	0	0	0	0	0	0	0	0	0	0	0	0	0	0	0	0	0	0	0	0	0	0	0	0	0	0	0	0	0	0
YOL020W	TAT2	1779	0	0	0	0	0	0	0	0	0	0	0	0	0	0	0	0	0	0	0	0	0	0	0	0	0	178 Stop 1 C->T	0	0	0	0	0	0	0	0	0	0	0	0	0	0	0	0	0	0	0	0	0
YOL024W	YOL024W	519	0	0	0	0	0	0	0	0	0	0	0	0	0	0	0	0	0	0	5 Stop 1 C->G	0	5 Stop 1 C->G	0	0	0	0	0	0	0	0	0	0	0	0	0	0	0	0	0	0	0	0	0	0	0	0	0	0
YOL028C	YAP7	738	0	714 FrSh 1 -->A	0	714 FrSh 1 -->A	714 FrSh 1 -->A	0	714 FrSh 1 -->A	714 FrSh 1 -->A	0	0	714 FrSh 1 -->A	0	0	714 FrSh 1 -->A	714 FrSh 1 -->A	0	714 FrSh 1 -->A	714 FrSh 1 -->A	714 FrSh 1 -->A	0	714 FrSh 1 -->A	0	714 FrSh 1 -->A	714 FrSh 1 -->A	0	714 FrSh 1 -->A	0	714 FrSh 1 -->A	714 FrSh 1 -->A	0	714 FrSh 1 -->A	714 FrSh 1 -->A	719 FrSh 1 -->A	714 FrSh 1 -->A	714 FrSh 1 -->A	714 FrSh 1 -->A	0	0	714 FrSh 1 -->A	714 FrSh 1 -->A	0	714 FrSh 1 -->A	714 FrSh 1 -->A	714 FrSh 1 -->A	714 FrSh 1 -->A	714 FrSh 1 -->A	714 FrSh 1 -->A
YOL029C	YOL029C	606	0	0	0	0	0	0	0	0	0	0	0	0	0	0	0	0	0	0	0	0	0	0	0	0	0	0	0	0	0	0	0	367 Stop 1 C->T	0	0	367 Stop 1 C->T	0	0	0	0	0	0	0	0	420 FrSh 2 T->-	0	0	0
YOL038C-A	YOL038C-A	96	0	0	0	0	0	0	0	0	0	0	0	0	0	0	47 Stop 1 T->A	0	0	0	0	0	0	0	0	47 Stop 1 T->A	0	0	0	0	47 Stop 1 T->A	0	47 Stop 1 T->A	47 Stop 1 T->A	40 FrSh 1 A->-	47 Stop 1 T->A	0	47 Stop 1 T->A	0	0	0	47 Stop 1 T->A	0	0	0	47 Stop 1 T->A	47 Stop 1 T->A	0	0
YOL047C	YOL047C	1134	0	0	0	0	0	0	0	0	0	0	0	0	0	0	0	0	0	0	0	0	0	0	0	0	0	0	0	0	0	0	0	716 FrSh 1 -->T	0	0	0	0	0	0	0	0	0	0	0	0	0	0	0
YOL063C	CRT10	2874	2869 Stop 1 C->T	2869 Stop 1 C->T	2869 Stop 1 C->T	2869 Stop 1 C->T	2869 Stop 1 C->T	2869 Stop 1 C->T	2869 Stop 1 C->T	2869 Stop 1 C->T	2869 Stop 1 C->T	2869 Stop 1 C->T	2869 Stop 1 C->T	2869 Stop 1 C->T	2869 Stop 1 C->T	2869 Stop 1 C->T	2869 Stop 1 C->T	2869 Stop 1 C->T	2869 Stop 1 C->T	2869 Stop 1 C->T	2869 Stop 1 C->T	2869 Stop 1 C->T	2869 Stop 1 C->T	2869 Stop 1 C->T	2869 Stop 1 C->T	2869 Stop 1 C->T	2869 Stop 1 C->T	2869 Stop 1 C->T	2869 Stop 1 C->T	2869 Stop 1 C->T	2869 Stop 1 C->T	2869 Stop 1 C->T	2869 Stop 1 C->T	2869 Stop 1 C->T	0	2869 Stop 1 C->T	2869 Stop 1 C->T	2869 Stop 1 C->T	2869 Stop 1 C->T	2869 Stop 1 C->T	2869 Stop 1 C->T	2869 Stop 1 C->T	2869 Stop 1 C->T	2869 Stop 1 C->T	2869 Stop 1 C->T	2869 Stop 1 C->T	2869 Stop 1 C->T	2869 Stop 1 C->T	2869 Stop 1 C->T
YOL068C	HST1	1512	0	0	0	0	41 FrSh 1 -->T	0	0	0	0	0	0	0	0	0	0	0	0	0	0	0	0	0	0	0	0	0	0	0	0	0	0	0	0	0	0	0	0	0	0	0	0	0	0	0	0	0	0
YOL075C	YOL075C	3885	0	0	0	0	0	0	0	0	0	0	0	0	0	0	0	0	0	0	0	0	0	0	0	0	0	0	0	0	787 Stop 1 G->T	0	0	0	0	0	0	0	0	0	0	0	0	0	0	0	0	0	0
YOL081W	IRA2	9240	0	0	0	0	0	0	0	7009 FrSh 1 A->-	0	0	0	0	0	0	0	0	0	0	0	0	0	0	0	0	7306 Stop 1 G->T	0	0	0	0	0	0	0	0	0	0	0	0	0	0	0	0	0	0	0	0	0	0
YOL083W	ATG34	1239	0	625 FrSh 2 -->A	0	0	0	0	0	0	0	0	0	0	0	0	0	0	0	0	0	0	0	0	296 FrSh 1 -->C	0	0	0	0	0	0	0	0	0	0	0	0	0	0	0	0	0	0	0	0	0	0	0	0
YOL097W-A	YOL097W-A	186	166 FrSh 1 A->-	166 FrSh 1 A->-	166 FrSh 1 A->-	0	0	166 FrSh 1 A->-	166 FrSh 1 A->-	0	166 FrSh 1 A->-	166 FrSh 1 A->-	0	166 FrSh 1 A->-	166 FrSh 1 A->-	0	166 FrSh 1 A->-	0	166 FrSh 1 A->-	0	166 FrSh 1 A->-	166 FrSh 1 A->-	0	166 FrSh 1 A->-	0	166 FrSh 1 A->-	166 FrSh 1 A->-	0	0	166 FrSh 1 A->-	0	166 FrSh 1 A->-	0	0	0	0	0	0	166 FrSh 1 A->-	166 FrSh 1 A->-	0	0	166 FrSh 1 A->-	0	0	0	0	0	0
YOL112W	MSB4	1479	0	0	0	0	0	0	0	0	0	0	0	0	0	0	0	0	0	0	0	0	0	0	0	0	0	0	0	0	0	0	0	0	0	0	0	0	0	0	0	0	0	0	0	0	0	0	0
YOL114C	YOL114C	609	0	0	0	0	0	0	0	0	0	0	0	0	0	0	0	0	0	0	0	0	0	0	0	0	0	0	0	0	0	0	0	0	0	0	0	0	0	0	0	0	0	0	0	0	0	606 Stop 1 T->G	0
YOL117W	RRI2	1938	0	0	0	0	0	0	0	0	0	0	0	0	0	0	0	0	0	0	0	0	0	0	0	0	0	0	0	0	0	0	0	0	0	0	0	0	0	0	0	0	0	0	0	0	0	0	1879 FrSh 1 -->A
YOL145C	CTR9	3234	0	0	0	0	0	0	0	0	0	0	0	0	0	0	0	0	0	0	0	0	0	0	0	0	0	0	0	0	0	0	0	0	0	0	0	0	0	0	0	0	0	0	0	0	0	0	0
YOL151W	GRE2	1029	0	0	0	0	0	0	0	0	0	0	0	0	0	0	0	0	0	0	0	0	0	0	0	0	0	0	0	0	0	0	0	0	0	0	633 FrSh 1 A->-	0	0	0	0	0	0	0	0	0	0	0	0
YOL152W	FRE7	1863	0	0	0	0	0	0	0	0	0	0	0	0	0	0	0	0	711 FrSh 47 G->-	0	0	0	0	0	0	0	0	0	0	0	0	1341 FrSh 1 C->-	0	0	0	0	0	0	0	0	0	0	0	0	0	0	0	0	0
YOL159C-A	YOL159C-A	273	0	0	0	0	201 FrSh 1 -->A	0	0	0	0	0	0	166 FrSh 1 A->-	0	0	0	0	0	0	166 FrSh 1 A->-	166 FrSh 1 A->-	166 FrSh 1 A->-	166 FrSh 1 A->-	0	0	0	0	201 FrSh 1 -->A	0	0	0	0	0	0	0	0	0	0	0	0	0	166 FrSh 1 A->-	0	0	0	0	0	0
YOR007C	SGT2	1041	0	0	0	0	0	0	0	0	0	0	0	0	1036 Stop 1 C->T	0	0	0	0	0	0	0	0	0	0	0	0	0	0	0	0	0	0	0	0	0	0	0	0	0	0	0	0	0	0	0	0	0	0
YOR008C-A	YOR008C-A	225	0	0	0	0	0	0	0	0	0	0	0	0	0	0	0	0	0	0	0	0	0	0	0	0	0	0	0	0	0	0	0	0	0	0	0	0	0	0	0	0	0	0	0	0	0	0	0
YOR011W-A	YOR011W-A	207	0	0	0	0	0	0	131 Stop 1 G->A	0	0	0	0	0	0	0	0	0	131 Stop 1 G->A	0	0	0	0	0	0	0	0	0	0	0	0	0	0	0	0	0	0	0	0	0	0	185 FrSh 1 -->A	0	0	0	0	0	0	0
YOR012W	YOR012W	414	331 FrSh 1 T->-	331 FrSh 1 T->-	331 FrSh 1 T->-	331 FrSh 1 T->-	331 FrSh 1 T->-	331 FrSh 1 T->-	331 FrSh 1 T->-	331 FrSh 1 T->-	331 FrSh 1 T->-	331 FrSh 1 T->-	331 FrSh 1 T->-	331 FrSh 1 T->-	331 FrSh 1 T->-	331 FrSh 1 T->-	331 FrSh 1 T->-	331 FrSh 1 T->-	331 FrSh 1 T->-	331 FrSh 1 T->-	331 FrSh 1 T->-	331 FrSh 1 T->-	331 FrSh 1 T->-	331 FrSh 1 T->-	331 FrSh 1 T->-	331 FrSh 1 T->-	331 FrSh 1 T->-	331 FrSh 1 T->-	0	331 FrSh 1 T->-	331 FrSh 1 T->-	331 FrSh 1 T->-	331 FrSh 1 T->-	331 FrSh 1 T->-	331 FrSh 1 T->-	331 FrSh 1 T->-	282 FrSh 1 C->-	331 FrSh 1 T->-	331 FrSh 1 T->-	331 FrSh 1 T->-	331 FrSh 1 T->-	331 FrSh 1 T->-	331 FrSh 1 T->-	331 FrSh 1 T->-	331 FrSh 1 T->-	331 FrSh 1 T->-	331 FrSh 1 T->-	331 FrSh 1 T->-	331 FrSh 1 T->-
YOR028C	CIN5	888	0	0	0	0	0	0	0	0	0	0	883 Stop 1 G->T	0	0	0	0	0	0	0	0	0	0	0	0	0	0	0	0	0	0	0	0	0	0	0	0	0	97 FrSh 1 -->A	0	0	0	0	0	883 Stop 1 G->T	0	0	0	0
YOR030W	DFG16	1860	0	0	0	0	0	0	0	0	0	1540 Stop 1 A->T	0	0	0	0	0	0	0	0	0	0	0	0	0	0	0	0	0	0	0	0	0	0	0	0	0	0	0	0	0	0	0	0	0	0	0	0	0
YOR032C	HMS1	1305	1153 Stop 1 C->T	0	0	0	0	0	0	1153 Stop 1 C->T	0	0	0	0	0	0	0	0	0	0	0	0	0	0	0	0	0	0	0	1153 Stop 1 C->T	0	0	0	0	0	0	0	0	0	0	0	0	0	0	0	0	1153 Stop 1 C->T	0	0
YOR032W-A	YOR032W-A	201	0	77 Stop 1 G->A	0	0	0	0	0	0	0	0	0	0	0	0	0	0	0	0	0	0	0	0	0	0	0	0	0	0	0	0	0	0	0	0	0	0	0	0	0	0	0	0	0	0	0	0	0
YOR034C-A	YOR034C-A	243	190 FrSh 1 T->-	0	190 FrSh 1 T->-	190 FrSh 1 T->-	190 FrSh 1 T->-	190 FrSh 1 T->-	190 FrSh 1 T->-	0	190 FrSh 2 T->-	190 FrSh 1 T->-	190 FrSh 1 T->-	190 FrSh 1 T->-	190 FrSh 1 T->-	190 FrSh 1 T->-	190 FrSh 1 T->-	190 FrSh 1 T->-	190 FrSh 1 T->-	190 FrSh 1 T->-	190 FrSh 1 T->-	190 FrSh 1 T->-	190 FrSh 1 T->-	190 FrSh 1 T->-	190 FrSh 1 T->-	190 FrSh 1 T->-	190 FrSh 1 T->-	190 FrSh 1 T->-	190 FrSh 1 T->-	190 FrSh 2 T->-	190 FrSh 1 T->-	190 FrSh 1 T->-	190 FrSh 2 T->-	190 FrSh 2 T->-	190 FrSh 1 T->-	190 FrSh 1 T->-	190 FrSh 2 T->-	190 FrSh 1 T->-	190 FrSh 1 T->-	190 FrSh 1 T->-	190 FrSh 2 T->-	190 FrSh 1 T->-	190 FrSh 1 T->-	190 FrSh 1 T->-	190 FrSh 1 T->-	190 FrSh 1 T->-	190 FrSh 1 T->-	0	0
YOR035C	SHE4	2370	0	0	0	0	0	0	0	0	0	0	0	0	0	0	0	0	0	0	0	0	0	0	0	0	0	0	147 FrSh 1 A->-	0	0	0	0	0	0	0	0	0	0	0	0	0	0	0	0	0	0	0	0
YOR043W	WHI2	1461	0	0	0	0	0	0	0	0	559 Stop 1 G->T	0	0	0	0	0	0	0	0	0	0	0	0	0	707 FrSh 7 -->A	169 Stop 1 C->T	0	0	0	0	0	0	0	0	0	0	0	0	0	0	0	0	0	0	0	0	0	0	0
YOR051C	ETT1	1239	0	0	0	0	0	0	0	0	0	0	0	0	0	0	0	0	0	0	1000 FrSh 19 -->G	0	0	0	0	0	0	0	0	0	0	0	0	0	0	0	0	0	0	0	0	0	0	0	0	0	0	0	0
YOR057W	SGT1	1188	0	0	0	0	0	0	0	0	0	0	0	0	0	0	0	0	0	0	0	0	0	0	0	0	0	0	0	0	0	0	0	0	0	0	0	0	0	0	0	0	0	0	0	961 FrSh 1 A->-	0	0	0
YOR062C	YOR062C	807	0	0	0	0	0	0	0	0	0	0	0	0	0	0	0	0	0	0	0	0	0	0	0	0	0	0	0	0	0	0	792 Stop 1 T->A	0	0	0	0	0	0	0	0	0	0	0	0	0	0	0	0
YOR064C	YNG1	660	0	0	0	0	0	0	0	631 Stop 1 A->T	0	0	0	0	0	0	0	0	0	0	0	0	0	0	0	0	0	0	0	0	0	0	0	0	0	0	0	0	0	0	0	0	0	0	0	0	0	0	0
YOR101W	RAS1	930	0	0	0	0	0	0	0	0	0	0	0	0	0	0	0	0	0	0	0	0	0	0	0	0	0	0	0	0	0	0	0	0	0	0	0	0	0	0	0	0	0	0	0	0	0	0	0
YOR107W	RGS2	930	847 Stop 1 C->T	0	903 FrSh 1 -->A	903 FrSh 1 -->A	903 FrSh 1 -->A	903 FrSh 1 -->A	903 FrSh 1 -->A	0	903 FrSh 1 -->A	903 FrSh 1 -->A	903 FrSh 1 -->A	903 FrSh 1 -->A	847 Stop 1 C->T	903 FrSh 1 -->A	903 FrSh 1 -->A	903 FrSh 1 -->A	903 FrSh 1 -->A	903 FrSh 1 -->A	903 FrSh 1 -->A	903 FrSh 1 -->A	903 FrSh 1 -->A	903 FrSh 1 -->A	903 FrSh 1 -->A	903 FrSh 1 -->A	903 FrSh 1 -->A	903 FrSh 1 -->A	903 FrSh 1 -->A	903 FrSh 1 -->A	903 FrSh 1 -->A	903 FrSh 1 -->A	903 FrSh 1 -->A	903 FrSh 1 -->A	903 FrSh 1 -->A	903 FrSh 1 -->A	903 FrSh 1 -->A	903 FrSh 1 -->A	903 FrSh 1 -->A	847 Stop 1 C->T	903 FrSh 1 -->A	903 FrSh 1 -->A	0	903 FrSh 1 -->A	903 FrSh 1 -->A	903 FrSh 1 -->A	903 FrSh 1 -->A	903 FrSh 1 -->A	0
YOR118W	RTC5	1704	0	0	0	0	0	0	0	0	0	0	0	0	0	0	0	0	0	0	0	0	0	0	0	808 FrSh 1 -->T	0	0	0	0	0	0	0	0	0	0	0	0	0	0	0	0	0	0	0	0	0	0	0
YOR120W	GCY1	939	0	0	0	0	0	0	0	0	0	0	0	0	0	0	0	0	0	0	0	0	0	0	0	0	0	0	0	0	0	0	0	0	0	0	0	0	0	0	0	0	0	0	0	0	0	0	0
YOR126C	IAH1	717	0	0	0	0	0	0	0	0	0	0	0	0	0	0	542 Stop 1 G->A	0	0	0	0	0	0	0	0	0	0	0	677 Stop 1 G->A	0	0	0	0	0	0	0	0	0	0	0	0	0	0	0	0	0	0	0	0
YOR129C	AFI1	2682	0	0	0	0	0	0	0	0	0	0	0	2659 Stop 1 G->T	0	0	0	2659 Stop 1 G->T	0	0	0	0	0	0	0	0	0	0	0	0	0	0	0	0	0	0	0	0	0	0	0	0	0	0	0	0	0	0	0
YOR148C	SPP2	558	548 FrSh 1 -->A	548 FrSh 1 -->A	548 FrSh 1 -->A	548 FrSh 2 -->A	548 FrSh 2 -->A	548 FrSh 2 -->A	548 FrSh 1 -->A	548 FrSh 1 -->A	548 FrSh 1 -->A	548 FrSh 1 -->A	0	548 FrSh 1 -->A	548 FrSh 1 -->A	548 FrSh 1 -->A	0	548 FrSh 1 -->A	548 FrSh 1 -->A	548 FrSh 2 -->A	548 FrSh 1 -->A	548 FrSh 1 -->A	548 FrSh 1 -->A	548 FrSh 1 -->A	0	548 FrSh 1 -->A	548 FrSh 1 -->A	548 FrSh 1 -->A	548 FrSh 1 -->A	548 FrSh 1 -->A	548 FrSh 1 -->A	548 FrSh 1 -->A	548 FrSh 1 -->A	548 FrSh 1 -->A	548 FrSh 1 -->A	0	0	548 FrSh 1 -->A	548 FrSh 1 -->A	548 FrSh 1 -->A	0	0	0	548 FrSh 1 -->A	0	0	548 FrSh 1 -->A	548 FrSh 1 -->A	0
YOR161C-C	YOR161C-C	147	0	0	0	0	0	0	114 Stop 1 C->A	0	0	0	0	0	0	114 Stop 1 C->A	0	0	0	0	0	0	0	0	114 Stop 1 C->A	0	0	0	0	0	0	0	0	0	0	0	0	114 Stop 1 C->A	0	0	0	0	0	114 Stop 1 C->A	0	0	114 Stop 1 C->A	0	0
YOR172W	YRM1	2361	0	0	0	0	0	0	0	0	0	0	0	0	0	0	0	0	0	0	0	0	0	0	0	0	0	0	0	0	0	0	0	0	0	0	0	0	0	0	0	0	0	0	0	0	0	0	0
YOR183W	FYV12	390	124 Stop 1 G->T	0	124 Stop 1 G->T	88 FrSh 2 C->-	0	88 FrSh 2 C->-	88 FrSh 2 C->-	88 FrSh 2 C->-	88 FrSh 2 C->-	124 Stop 1 G->T	0	124 Stop 1 G->T	124 Stop 1 G->T	0	124 Stop 1 G->T	0	0	88 FrSh 2 C->-	88 FrSh 2 C->-	124 Stop 1 G->T	0	124 Stop 1 G->T	0	124 Stop 1 G->T	88 FrSh 2 C->-	88 FrSh 2 C->-	88 FrSh 2 C->-	0	0	0	0	0	378 FrSh 1 C->-	0	0	0	88 FrSh 2 C->-	88 FrSh 2 C->-	123 FrSh 1 A->-	0	0	0	0	123 FrSh 1 A->-	0	123 FrSh 1 A->-	124 Stop 1 G->T
YOR186W	YOR186W	435	0	0	0	0	0	0	0	0	0	0	130 Stop 1 C->T	0	0	0	0	0	0	0	0	0	0	0	0	0	0	0	0	0	0	0	0	0	0	0	0	0	0	0	0	0	0	0	130 Stop 1 C->T	0	0	0	0
YOR190W	SPR1	1338	0	0	0	0	0	0	0	0	0	0	0	0	0	0	0	0	0	0	0	0	0	0	0	0	0	0	0	0	0	0	0	0	0	0	0	0	0	0	0	0	0	0	0	0	0	0	0
YOR196C	LIP5	1245	0	0	0	0	0	0	0	0	0	0	0	0	0	0	0	0	0	0	0	0	0	0	0	0	0	0	0	0	0	0	0	0	0	0	0	0	0	0	0	0	0	0	0	0	0	0	0
YOR201C	MRM1	1239	0	0	0	0	0	0	0	0	0	0	0	0	0	0	0	0	0	0	0	0	0	0	0	0	0	0	0	0	0	0	0	0	0	1233 Stop 1 T->A	0	0	0	0	0	0	0	0	0	0	0	0	0
YOR220W	RCN2	798	0	0	0	0	0	791 FrSh 1 -->T	0	0	0	0	0	0	0	0	0	0	0	0	0	0	0	0	0	0	0	0	0	0	0	0	0	0	0	0	0	0	0	0	0	88 FrSh 1 G->-	0	0	0	0	0	0	0
YOR233W	KIN4	2403	0	0	0	0	0	0	0	0	0	0	0	0	0	0	0	0	0	0	0	0	0	0	0	0	0	0	0	0	0	0	0	0	0	0	0	0	0	0	0	0	0	0	0	0	0	0	0
YOR241W	MET7	1647	0	20 FrSh 1 A->-	0	0	0	0	0	20 FrSh 1 A->-	0	0	20 FrSh 1 A->-	0	0	20 FrSh 1 A->-	0	20 FrSh 1 A->-	20 FrSh 1 A->-	20 FrSh 1 A->-	0	0	0	0	20 FrSh 1 A->-	0	0	0	0	0	20 FrSh 1 A->-	20 FrSh 1 A->-	20 FrSh 1 A->-	20 FrSh 1 A->-	0	20 FrSh 1 A->-	20 FrSh 1 A->-	20 FrSh 1 A->-	0	0	20 FrSh 1 A->-	20 FrSh 1 A->-	0	20 FrSh 1 A->-	20 FrSh 1 A->-	20 FrSh 1 A->-	20 FrSh 1 A->-	20 FrSh 2 A->-	0
YOR262W	YOR262W	1044	0	0	0	0	0	0	0	0	0	0	0	0	0	0	0	0	0	0	0	0	0	0	1026 FrSh 1 -->C	0	0	0	0	0	0	0	0	0	0	0	0	0	0	0	0	0	0	0	0	0	0	0	0
YOR264W	DSE3	1293	0	0	0	0	0	0	0	0	0	0	0	0	0	0	0	0	0	0	0	0	0	0	0	728 FrSh 1 -->A	0	0	0	0	0	0	0	0	0	0	0	0	0	0	0	0	0	0	0	0	0	0	0
YOR268C	YOR268C	399	0	0	0	0	0	0	0	0	0	0	0	0	0	0	0	0	0	0	0	0	0	0	0	0	0	0	0	0	0	0	0	0	0	0	0	0	0	0	320 FrSh 1 -->T	0	0	0	0	0	0	0	0
YOR273C	TPO4	1980	0	0	0	0	0	0	0	0	0	0	0	0	0	0	0	0	0	0	0	0	0	0	0	0	0	0	0	0	0	0	0	0	0	0	0	0	0	0	0	0	0	0	0	0	0	0	0
YOR284W	HUA2	732	458 FrSh 1 A->-	0	0	0	0	0	0	0	0	0	0	0	0	0	0	0	0	0	0	0	0	0	0	0	0	0	421 Stop 1 G->T	0	421 Stop 1 G->T	0	0	0	0	0	0	0	0	0	0	0	0	0	0	0	0	0	0
YOR301W	RAX1	1308	0	0	0	0	708 Stop 1 C->G	0	0	0	0	0	0	0	0	0	0	0	0	0	0	0	0	0	0	0	0	0	0	0	0	0	0	0	0	0	0	0	0	0	0	0	0	0	0	0	0	0	0
YOR307C	SLY41	1362	0	0	0	0	0	0	0	0	0	0	0	0	0	0	0	0	0	0	0	0	0	0	0	0	0	0	0	0	0	0	0	0	0	0	0	0	0	0	0	0	0	0	0	0	0	0	0
YOR316C-A	YOR316C-A	210	0	92 FrSh 1 A->-	0	0	0	92 FrSh 1 A->-	92 FrSh 1 A->-	0	0	0	92 FrSh 2 A->-	0	0	0	0	92 FrSh 1 A->-	0	92 FrSh 1 A->-	0	0	0	0	0	0	0	0	92 FrSh 1 A->-	0	92 FrSh 1 A->-	92 FrSh 1 A->-	92 FrSh 1 A->-	92 FrSh 1 A->-	92 FrSh 1 A->-	0	0	0	0	0	0	0	0	0	92 FrSh 2 A->-	0	0	92 FrSh 1 -->A	92 FrSh 1 A->-
YOR316C	COT1	1320	0	0	0	0	0	0	0	0	0	0	0	0	0	0	0	0	0	0	0	0	0	0	0	0	0	0	0	0	0	321 FrSh 1 C->-	321 FrSh 1 C->-	321 FrSh 1 C->-	0	0	0	0	0	0	0	0	0	0	0	0	0	19 Stop 1 C->T	321 FrSh 1 C->-
YOR360C	PDE2	1581	0	0	0	0	0	0	0	0	0	0	0	0	0	0	443 FrSh 1 T->-	0	0	0	0	0	0	0	0	1071 FrSh 1 A->-	0	0	0	0	0	0	0	0	0	0	0	0	0	0	0	0	0	0	0	0	0	0	0
YOR361C	PRT1	2292	0	0	0	0	0	0	0	0	0	0	0	0	0	0	0	0	0	0	0	48 Stop 1 T->G	0	0	0	0	0	0	0	0	0	0	0	0	0	0	0	0	0	0	0	0	0	0	0	0	0	0	0
YOR365C	YOR365C	2112	0	0	0	0	0	0	0	0	0	0	0	0	0	0	0	0	0	0	0	0	0	0	0	0	1942 Stop 1 A->T	0	0	0	0	0	0	0	0	0	0	0	0	0	0	0	0	0	0	0	0	0	0
YOR376W-A	YOR376W-A	156	0	0	0	0	0	0	0	0	0	0	0	0	0	0	0	58 FrSh 2 -->T	0	0	0	0	0	0	0	0	0	0	0	0	0	0	0	0	0	0	0	58 FrSh 2 -->T	0	0	0	0	0	0	0	0	0	0	0
YOR378W	YOR378W	1548	0	0	0	0	0	0	0	0	0	0	0	0	0	0	0	0	0	0	0	0	0	0	0	0	0	0	0	0	0	0	0	0	0	414 FrSh 1 T->-	0	0	0	0	0	0	0	0	0	0	0	0	0
YOR380W	RDR1	1641	0	0	0	0	0	0	0	0	874 Stop 1 G->T	0	0	0	0	0	0	0	0	0	0	874 Stop 1 G->T	0	0	0	0	0	0	0	0	0	0	0	0	0	0	0	0	874 Stop 1 G->T	0	0	0	0	0	0	0	0	0	0
YPL014W	YPL014W	1146	0	572 FrSh 1 A->-	0	0	0	0	0	572 FrSh 1 A->-	0	0	0	0	0	0	0	0	0	0	0	0	0	0	0	0	0	0	0	0	0	0	0	0	0	0	0	0	0	0	0	0	0	0	0	0	0	0	0
YPL015C	HST2	1074	0	0	0	0	0	0	0	0	0	0	0	0	0	0	0	0	0	0	0	0	0	0	0	0	0	0	0	0	0	0	0	0	0	0	0	0	0	0	0	0	0	0	0	0	0	0	0
YPL017C	IRC15	1500	0	0	0	0	0	0	0	0	0	0	0	0	0	0	0	0	0	0	0	0	0	0	0	0	0	0	0	0	0	0	0	0	0	0	0	0	0	0	0	0	0	0	0	39 FrSh 1 -->A	0	0	0
YPL021W	ECM23	564	0	0	0	0	0	0	0	0	0	0	0	0	0	0	0	0	0	0	0	0	0	0	0	0	0	0	0	0	0	0	0	0	0	0	0	0	0	0	0	0	0	0	0	0	0	0	0
YPL027W	SMA1	738	0	0	0	0	0	0	0	0	0	0	0	0	0	0	0	0	0	0	0	0	0	0	0	0	0	0	0	0	0	0	0	0	0	716 Stop 1 C->G	0	0	0	0	0	0	0	0	0	0	0	0	0
YPL038W-A	YPL038W-A	192	73 Stop 1 A->T	73 Stop 1 A->T	73 Stop 1 A->T	73 Stop 1 A->T	0	73 Stop 1 A->T	73 Stop 1 A->T	97 Stop 1 C->T	73 Stop 1 A->T	73 Stop 1 A->T	0	73 Stop 1 A->T	73 Stop 1 A->T	7 FrSh 1 T->-	73 Stop 1 A->T	0	0	73 Stop 1 A->T	73 Stop 1 A->T	73 Stop 1 A->T	115 Stop 1 C->T	73 Stop 1 A->T	0	73 Stop 1 A->T	73 Stop 1 A->T	0	73 Stop 1 A->T	73 Stop 1 A->T	73 Stop 1 A->T	73 Stop 1 A->T	0	0	80 FrSh 1 A->-	0	0	0	73 Stop 1 A->T	73 Stop 1 A->T	114 FrSh 2 -->A	0	73 Stop 1 A->T	7 FrSh 1 T->-	0	80 FrSh 1 A->-	0	80 FrSh 1 A->-	73 Stop 1 A->T
YPL041C	YPL041C	624	0	0	0	0	0	0	0	0	0	0	0	0	0	0	0	0	0	0	0	0	0	0	0	0	0	0	0	0	0	0	0	0	0	0	0	0	0	0	0	0	0	0	0	0	0	0	0
YPL054W	LEE1	906	0	0	0	0	0	0	0	0	0	0	0	0	0	0	0	0	0	0	0	0	0	0	0	297 FrSh 1 C->-	0	0	0	0	0	0	0	0	0	0	0	0	0	0	0	0	0	0	0	0	0	0	0
YPL056C	LCL1	306	158 FrSh 5 G->-	92 FrSh 7 -->C	272 FrSh 1 T->-	272 FrSh 1 T->-	272 FrSh 1 T->-	272 FrSh 1 T->-	272 FrSh 1 T->-	272 FrSh 1 -->T	272 FrSh 1 T->-	272 FrSh 1 T->-	158 FrSh 5 G->-	272 FrSh 1 T->-	158 FrSh 5 G->-	158 FrSh 5 G->-	272 FrSh 1 T->-	92 FrSh 8 -->C	92 FrSh 5 -->C	272 FrSh 1 T->-	272 FrSh 1 T->-	272 FrSh 1 T->-	92 FrSh 7 -->C	272 FrSh 1 T->-	140 Stop 1 C->A	272 FrSh 1 T->-	272 FrSh 1 T->-	272 FrSh 1 T->-	272 FrSh 1 T->-	0	272 FrSh 1 T->-	272 FrSh 1 T->-	272 FrSh 1 -->T	92 FrSh 5 -->C	92 FrSh 5 -->C	92 FrSh 4 -->C	158 FrSh 5 G->-	158 FrSh 5 G->-	272 FrSh 1 T->-	272 FrSh 1 T->-	92 FrSh 4 -->C	92 FrSh 5 -->C	272 FrSh 1 T->-	92 FrSh 8 -->C	158 FrSh 5 G->-	123 FrSh 1 -->A	92 FrSh 4 -->C	92 FrSh 8 -->C	272 FrSh 1 T->-
YPL058C	PDR12	4536	0	0	0	0	0	0	0	0	0	0	0	0	0	0	0	0	0	0	0	0	0	0	0	0	0	0	0	0	0	0	0	0	0	0	0	0	0	0	0	0	0	0	0	0	0	0	0
YPL072W	UBP16	1500	0	1493 FrSh 1 -->A	0	0	0	0	0	1493 FrSh 1 -->A	0	0	1493 FrSh 1 -->A	0	0	0	0	0	0	0	0	0	0	0	1493 FrSh 1 -->A	1493 FrSh 1 -->A	0	0	0	0	0	0	0	0	0	1493 FrSh 1 -->A	1493 FrSh 1 -->A	0	0	0	0	1493 FrSh 1 -->A	0	0	1493 FrSh 1 -->A	0	1493 FrSh 1 -->A	1493 FrSh 1 -->A	0
YPL092W	SSU1	1377	0	0	0	0	0	0	0	0	0	0	0	0	0	0	0	0	0	0	0	0	0	0	0	0	0	0	0	0	0	0	0	0	0	0	0	0	0	0	0	0	0	0	0	0	0	0	0
YPL098C	MGR2	342	0	0	0	0	0	0	0	0	0	0	0	0	0	0	0	160 Stop 1 A->T	0	0	0	0	0	0	0	0	0	0	0	0	0	0	0	0	0	0	0	0	0	0	0	0	0	0	0	0	0	0	0
YPL100W	ATG21	1491	0	0	0	0	0	0	0	0	0	0	0	0	0	0	0	0	0	0	0	0	0	0	0	0	0	0	0	0	0	0	0	0	0	0	0	0	0	0	0	0	0	0	0	0	0	0	0
YPL109C	YPL109C	2126	1871 FrSh 1 -->T	1878 FrSh 10 -->T	1871 FrSh 1 -->T	1871 FrSh 1 -->T	0	0	0	1878 FrSh 10 -->T	0	1871 FrSh 1 -->T	0	1871 FrSh 1 -->T	1871 FrSh 1 -->T	1871 FrSh 1 -->T	1871 FrSh 1 -->T	1871 FrSh 1 -->T	1878 FrSh 10 -->T	0	1871 FrSh 1 -->T	1871 FrSh 1 -->T	0	1871 FrSh 1 -->T	0	0	0	0	0	0	0	0	0	0	0	1871 FrSh 1 -->T	1871 FrSh 1 -->T	1871 FrSh 1 -->T	1871 FrSh 1 -->T	1871 FrSh 1 -->T	0	0	0	1871 FrSh 1 -->T	0	0	1871 FrSh 1 -->T	0	0
YPL119C-A	YPL119C-A	264	0	105 FrSh 2 -->C	0	0	0	124 FrSh 2 T->-	124 FrSh 2 T->-	105 FrSh 2 -->C	0	0	124 FrSh 2 T->-	166 Stop 1 G->T	0	124 FrSh 2 T->-	0	0	0	0	0	0	124 FrSh 2 T->-	0	124 FrSh 2 T->-	0	0	0	0	126 Stop 1 C->A	0	124 FrSh 2 T->-	124 FrSh 2 T->-	124 FrSh 2 T->-	166 Stop 1 G->T	124 FrSh 2 T->-	124 FrSh 2 T->-	105 FrSh 2 T->-	0	0	124 FrSh 2 T->-	124 FrSh 2 T->-	0	124 FrSh 2 T->-	124 FrSh 2 T->-	124 FrSh 2 T->-	124 FrSh 2 T->-	124 FrSh 2 T->-	105 FrSh 2 -->C
YPL119C	DBP1	1854	0	0	0	0	0	0	0	0	0	0	0	0	0	0	0	0	0	0	0	0	0	0	1235 FrSh 1 G->-	0	0	0	0	0	0	0	0	0	0	0	0	0	0	0	0	0	0	0	0	0	0	0	0
YPL120W	VPS30	1674	0	0	0	0	0	0	0	0	0	0	0	0	0	0	0	0	0	0	0	0	0	0	1598 FrSh 1 C->-	0	0	0	0	0	0	0	0	0	0	0	0	0	0	0	0	0	0	0	0	0	0	0	0
YPL139C	UME1	1383	0	0	0	0	0	0	0	0	0	0	0	0	0	0	0	1360 Stop 1 G->T	0	0	0	0	0	0	0	0	0	0	0	0	0	0	0	0	0	0	0	0	0	0	0	0	0	0	0	0	0	0	0
YPL147W	PXA1	2613	0	0	0	0	0	0	0	0	0	0	0	0	0	0	0	0	0	0	0	0	0	0	0	0	0	0	0	0	0	0	0	0	0	0	0	0	0	0	0	0	0	0	0	0	0	0	0
YPL156C	PRM4	855	0	0	0	0	0	0	0	0	0	0	0	0	0	0	0	0	0	0	0	0	0	0	0	0	0	0	0	0	0	0	0	0	0	0	0	0	0	0	0	0	0	0	0	0	0	0	0
YPL164C	MLH3	2148	0	0	0	0	0	0	0	0	0	0	0	0	0	0	0	0	0	0	0	0	0	0	0	0	0	0	0	0	0	0	0	0	0	0	0	0	0	0	0	0	0	0	0	0	0	0	0
YPL165C	SET6	1122	0	0	0	0	0	0	0	0	0	0	0	0	0	0	0	420 Stop 1 T->A	0	0	0	0	0	0	0	0	0	0	0	0	0	0	0	0	0	0	0	0	0	0	0	0	0	0	0	0	0	0	0
YPL166W	ATG29	642	0	634 Stop 1 C->T	0	634 Stop 1 C->T	0	0	0	634 Stop 1 C->T	0	0	0	0	0	0	0	0	634 Stop 1 C->T	634 Stop 1 C->T	0	0	0	0	0	0	0	0	0	634 Stop 1 C->T	0	0	0	0	0	0	0	0	0	0	0	634 Stop 1 C->T	634 Stop 1 C->T	0	0	0	634 Stop 1 C->T	0	634 Stop 1 C->T
YPL177C	CUP9	921	0	0	0	0	0	0	0	0	0	0	0	0	0	0	0	0	0	0	0	0	0	0	0	0	0	0	180 Stop 1 T->A	0	0	0	0	0	0	0	0	0	0	0	0	0	0	0	0	0	0	0	0
YPL179W	PPQ1	1650	0	0	0	0	0	0	0	0	0	0	0	0	0	0	0	0	0	0	0	0	0	0	0	0	0	0	0	0	0	0	0	0	0	0	0	0	0	0	0	0	0	0	0	0	0	0	0
YPL189W	GUP2	1830	0	0	0	0	0	1091 FrSh 1 -->A	0	0	0	0	0	0	0	0	0	0	0	0	0	0	0	0	0	0	0	0	0	0	0	0	0	0	0	0	0	0	0	0	0	0	0	0	0	0	0	0	0
YPL191C	YPL191C	1083	0	0	0	0	0	0	0	0	0	0	0	0	0	0	0	0	0	0	0	0	0	0	0	0	0	0	0	0	0	0	0	0	0	0	0	0	0	0	0	0	0	0	0	0	0	0	0
YPL216W	YPL216W	3309	0	1330 Stop 1 G->T	0	0	0	0	0	0	0	0	0	1849 FrSh 1 -->A	0	0	0	0	0	0	0	0	3124 FrSh 1 -->A	0	0	0	0	0	0	1040 Stop 1 C->A	0	0	0	0	0	0	0	0	0	0	0	0	0	0	0	0	0	0	0
YPL223C	GRE1	507	0	400 Stop 1 C->T	0	0	0	0	0	0	0	0	0	0	0	0	0	0	0	0	0	0	0	0	0	0	0	0	0	0	0	0	0	0	0	0	0	0	0	0	0	0	0	0	0	0	0	0	0
YPL224C	MMT2	1455	0	0	0	0	0	0	0	0	0	0	1363 Stop 1 A->T	0	0	0	0	0	0	0	0	0	0	0	0	0	0	0	0	0	0	0	0	0	0	0	0	0	0	0	0	0	0	0	1363 Stop 1 A->T	0	0	0	0
YPL247C	YPL247C	1572	0	0	0	0	0	0	0	0	0	0	0	0	0	0	0	0	0	0	0	0	0	0	0	0	0	0	0	0	0	0	0	0	0	0	0	0	0	0	0	0	0	0	0	0	0	0	0
YPL248C	GAL4	2646	0	0	0	0	0	0	0	0	0	0	0	0	0	0	0	0	0	0	0	0	0	0	0	0	0	0	0	0	0	0	2633 FrSh 1 -->C	2633 FrSh 1 -->C	0	0	0	0	0	0	0	0	0	0	0	0	0	0	0
YPL267W	ACM1	630	0	0	0	0	0	0	0	0	0	0	0	0	0	0	0	0	0	0	0	0	0	0	0	0	0	0	0	0	0	0	588 FrSh 1 A->-	0	0	0	0	0	0	0	0	0	0	0	0	0	0	0	0
YPR004C	AIM45	1035	0	0	0	0	1026 FrSh 1 A->-	1026 FrSh 1 A->-	0	1026 FrSh 1 A->-	0	0	1026 FrSh 1 A->-	0	0	1026 FrSh 1 A->-	0	1026 FrSh 1 A->-	1026 FrSh 1 A->-	0	0	0	1026 FrSh 1 A->-	0	1026 FrSh 1 A->-	0	0	0	1026 FrSh 1 A->-	1026 FrSh 1 A->-	0	0	1026 FrSh 1 A->-	1026 FrSh 1 A->-	1026 FrSh 1 A->-	1026 FrSh 1 A->-	1026 FrSh 1 A->-	1026 FrSh 1 A->-	0	0	1026 FrSh 1 A->-	1026 FrSh 1 A->-	0	1026 FrSh 1 A->-	1026 FrSh 1 A->-	1026 FrSh 1 A->-	1026 FrSh 1 A->-	1026 FrSh 1 A->-	1026 FrSh 1 A->-
YPR011C	YPR011C	981	0	0	0	0	0	0	0	0	0	0	0	0	0	0	0	0	0	0	0	0	0	0	0	0	0	0	0	0	0	0	0	0	0	0	0	0	0	0	0	0	0	0	0	0	0	303 Stop 1 C->A	0
YPR041W	TIF5	1218	0	0	0	0	0	0	0	0	0	0	1213 Stop 1 G->T	0	0	0	0	0	0	0	0	0	0	0	0	0	0	0	0	0	0	0	0	0	0	0	0	0	0	0	0	0	0	0	1213 Stop 1 G->T	0	0	0	0
YPR065W	ROX1	1107	0	0	0	0	0	0	0	0	0	0	1058 Stop 1 C->G	0	0	0	0	0	0	0	0	0	0	0	0	0	0	0	0	0	0	0	0	0	0	0	0	0	0	0	0	0	0	0	1058 Stop 1 C->G	0	0	0	0
YPR071W	YPR071W	636	0	0	0	0	0	0	0	0	0	0	0	0	0	0	0	0	0	0	0	0	0	0	0	0	0	0	0	0	0	0	0	0	0	0	0	0	0	0	0	0	0	0	0	0	0	256 Stop 1 A->T	0
YPR073C	LTP1	486	0	0	0	0	0	0	0	0	0	0	0	0	0	0	0	0	0	0	0	0	0	0	0	0	0	0	0	0	0	0	0	0	0	0	0	0	0	0	0	0	0	0	0	0	0	0	0
YPR078C	YPR078C	1119	0	0	0	0	0	0	0	0	0	0	0	0	0	0	0	0	0	0	0	0	0	0	0	0	0	0	0	0	0	0	0	0	1111 Stop 1 C->T	0	0	0	0	0	0	0	0	0	0	0	0	0	0
YPR091C	YPR091C	2313	0	0	0	0	0	0	0	0	0	0	0	0	0	0	0	0	0	0	0	0	0	0	0	0	0	2296 Stop 1 C->T	0	0	0	0	2296 Stop 1 C->T	2296 Stop 1 C->T	0	0	0	0	0	0	0	0	0	0	0	0	0	0	0
YPR096C	YPR096C	303	0	0	0	0	0	0	0	0	0	0	0	0	0	279 FrSh 2 A->-	279 FrSh 2 A->-	0	279 FrSh 2 A->-	0	0	0	279 FrSh 2 A->-	0	0	0	0	279 FrSh 2 A->-	0	0	0	0	279 FrSh 2 A->-	279 FrSh 2 A->-	0	279 FrSh 2 A->-	279 FrSh 2 A->-	279 FrSh 2 A->-	0	0	279 FrSh 2 A->-	279 FrSh 2 A->-	0	279 FrSh 2 A->-	0	279 FrSh 2 A->-	0	0	279 FrSh 2 A->-
YPR114W	YPR114W	948	0	0	0	0	0	0	0	0	0	0	0	0	0	0	0	0	0	0	0	0	0	0	0	0	0	0	0	0	0	0	0	0	0	0	0	0	0	0	0	0	0	0	0	0	0	0	0
YPR117W	YPR117W	7470	0	0	0	0	0	0	0	0	0	0	0	0	0	0	0	0	0	0	0	0	0	0	0	0	0	0	0	0	0	0	0	0	0	0	0	0	0	0	0	0	0	0	0	0	0	0	0
YPR164W	MMS1	4224	0	0	0	0	0	0	0	0	0	0	4197 FrSh 1 T->-	0	0	0	0	0	0	0	0	0	0	0	0	0	0	0	0	0	0	0	0	0	0	0	0	0	0	0	0	0	0	0	4197 FrSh 1 T->-	0	0	0	0
YPR179C	HDA3	1968	0	0	0	0	0	0	0	0	0	0	0	0	0	0	0	0	0	0	0	0	0	0	0	0	0	0	1938 FrSh 1 -->A	1938 FrSh 2 -->A	0	0	0	0	0	0	0	0	0	0	0	0	0	0	0	0	0	0	1938 FrSh 1 -->A
YOR031W	CRS5	210	25 Stop 1 T->G	25 Stop 1 T->G	25 Stop 1 T->G	25 Stop 1 T->G	25 Stop 1 T->G	25 Stop 1 T->G	25 Stop 1 T->G	25 Stop 1 T->G	25 Stop 1 T->G	25 Stop 1 T->G	25 Stop 1 T->G	25 Stop 1 T->G	25 Stop 1 T->G	25 Stop 1 T->G	25 Stop 1 T->G	25 Stop 1 T->G	25 Stop 1 T->G	25 Stop 1 T->G	25 Stop 1 T->G	25 Stop 1 T->G	25 Stop 1 T->G	25 Stop 1 T->G	25 Stop 1 T->G	25 Stop 1 T->G	25 Stop 1 T->G	25 Stop 1 T->G	25 Stop 1 T->G	25 Stop 1 T->G	25 Stop 1 T->G	25 Stop 1 T->G	25 Stop 1 T->G	25 Stop 1 T->G	25 Stop 1 T->G	25 Stop 1 T->G	25 Stop 1 T->G	25 Stop 1 T->G	25 Stop 1 T->G	25 Stop 1 T->G	25 Stop 1 T->G	25 Stop 1 T->G	25 Stop 1 T->G	25 Stop 1 T->G	25 Stop 1 T->G	25 Stop 1 T->G	25 Stop 1 T->G	25 Stop 1 T->G	25 Stop 1 T->G
KHR (D00905)	KHR (D00905)	891	-	0	0	-	0	-	-	-	0	-	14 FrSh 2-->G	-	-	14 FrSh 2-->G	14 FrSh 2-->G	0	-	1326 Stop 1 C->A	0	0	0	0	14 FrSh 2-->G	-	0	-	-	0	14 FrSh 2-->G	0	-	-	-	14 FrSh 2-->G	0	14 FrSh 2-->G	0	0	14 FrSh 2-->G	14 FrSh 2-->G	-	14 FrSh 2-->G	14 FrSh 2-->G	14 FrSh 2-->G	0	-	0
KHS(AAFW02000048.1)	KHS(AAFW02000048.1)	1053	198 Stop 1 G->A	198 Stop 1 G->A	0	0	0	0	0	198 Stop 1 G->A	0	0	0	0	198 Stop 1 G->A	198 Stop 1 G->A	0	198 Stop 1 G->A	0	0	0	0	198 Stop 1 G->A	0	0	198 Stop 1 G->A	0	0	198 Stop 1 G->A	0	0	0	198 Stop 1 G->A	198 Stop 1 G->A	198 Stop 1 G->A	0	198 Stop 1 G->A	198 Stop 1 G->A	0	0	198 Stop 1 G->A	198 Stop 1 G->A	0	198 Stop 1 G->A	0	198 Stop 1 G->A	0	198 Stop 1 G->A	198 Stop 1 G->A
[truncated: 46 more columns]
