# Supplementary material for: The 100-genomes strains, an S. cerevisiae resource that illuminates its natural phenotypic and genotypic variation and emergence as an opportunistic pathogen
Source: HighWire-hosted journal article supplement (doi:10.1101/gr.185538.114), 2015-04-03
Supplement: Table_S13.xlsx [file Table_S13.xlsx]

## Sheet: Sheet1
The presence/absence in the 93 strains of polymorphisms previously described to be phenotypically relevant.
		AQY1 (YPS163)	AQY1 (YPS163)	AQY1 (YPS163)	AQY2 (YPS163)	AQY2 (YPS163)	AQY2 (YPS163)	AQY2 (YPS163)		MKT1 (s288c)	END3 (s288c)	NCS2 (s288c)	NCS2 (s288c)	MIP1 (s288c)	RAD5 (s288c)	RAD5(s288c)	RAD5(s288c)	AMN1 (RM11)	FLO8(Sigma)		CYS4 (s288c)	BUL2 (RM11)	RDS2 (s288c)	IME1 (s288c)	IME1 (s288c)	RSF1 (s288c)	RSF1 (s288c)	RME1 (s288c)		RME1 (s288c)	TAO3 (s288c)	TAO3 (s288c)	RAS2 (s288c)	TRM10(RM11)	SSY1 (s288c)	SSY1 (s288c)	CDC28 (s288c)	GPA1 (s288c)	SAL1 (RM11)	GAL3 (s288c)	CAT5 (RM11)		SSD1 (s288c)	HO (s288c)	HO (s288c)	HO (s288c)	HO (s288c)	HO (s288c)	PMS1 (s288c)
Strains	Clinical (C) or non Clinical (N)	V121M	A879 deletion	1-33 AA deletion	11-bp deletion	G25 deletion	G528 deletion	non sense/ frameshift	Strains	A89G	S258N	A212T	others (frameshifts)	G1981A	I791S	G535R	others	D368V	G425A nonsense	Strains	I123N	F883L	H251D	L325M	5’UTR A-548G	D181G	others	5’UTR indel-308A	Strains	others	G4477C	others	5’UTR polyA	S139P	T8 vs T9	others	S79F	T1406G	1209 insG	TGC to TGA	M91I	Strains	TAC 698 TAG		189 A	223S	405S	475L	R818K
s288c	N	V to M			Deletion				S288C									D to V	G to A	S288C		F to L							S288C					S to P					insertion 1209 G		M to I	S288C
w303	N	V to M			Deletion				w303	A to G						G to R		D to V	G to A	w303									w303			291G del		S to P		A540 deletion						w303	TAC 698 TAG	seq incomplete
YPS163	N								YPS163	A to G		A to T		G to A						YPS163			H to D					Insertion	YPS163			4478A del	insertion A	S to P	NONE			T to G				YPS163				G	L
YJM789	C	V to M			Deletion				YJM789	A to G	S to N	A to T		G to A			K434 stop (AAG to TAG)			YJM789			H to D						YJM789				insertion A	S to P				T to G			M to I	YJM789		insertion-deletion constructed in vitro
SK1	N		Deletion			Deletion			SK1	A to G		A to T	G439 deletion	G to A						SK1			H to D					Insertion	SK1		G to C	650T del	? see note	S to P				T to G		TGC to TGA		SK1				G	L		R to K
Sigma1278b	N		Deletion						Sigma1278b	A to G			1193 insertion of A	G to A						Sigma1278b						D to G			Sigma1278b					S to P				T to G				Sigma1278b
JAY291	N		Deletion		Deletion				JAY291	A to G		A to T		G to A						JAY291									JAY291				insertion AA					T to G				JAY291		108 bp deletion at 1572		G	L
M22	N		Deletion		Deletion				M22	A to G	S to N	A to T		G to A						M22	I to N					D to G			M22									T to G				M22			T	G	L	H
RM11	N		Deletion		Deletion				RM11	A to G	S to N	A to T		G to A	I to S					RM11						D to G	Deletion T 635		RM11									T to G				RM11
YJM1078	C		Deletion		Deletion				YJM1078	A to G		A to T		G to A						YJM1078				L to M					YJM1078									T to G				YJM1078			T	G	L
YJM1083	C	V to M			Deletion				YJM1083	A to G		A to T		G to A						YJM1083			H to D						YJM1083					S to P				T to G				YJM1083		1371 T insertion	T	G	L
YJM1129	N		Deletion		Deletion				YJM1129	A to G	S to N	A to T		G to A						YJM1129									YJM1129	12 bp deletion 157								T to G				YJM1129			T	G	L	H
YJM1133	C	V to M				Deletion			YJM1133	A to G	S to N	A to T		G to A						YJM1133									YJM1133	12 bp deletion 157				S to P				T to G				YJM1133				G	L		R to K
YJM1190	C	V to M			Deletion				YJM1190	A to G	S to N	A to T		G to A						YJM1190								Insertion	YJM1190				insertion A	S to P				T to G				YJM1190				G	L
YJM1199	C	V to M				Deletion			YJM1199	A to G	S to N	A to T		G to A						YJM1199								Insertion	YJM1199				insertion A									YJM1199			T	G	L
YJM1202	C	V to M				Deletion			YJM1202	A to G	S to N	A to T		G to A						YJM1202								Insertion	YJM1202				insertion A					T to G				YJM1202			T	G	L
YJM1208	C		Deletion			Deletion			YJM1208	A to G		A to T		G to A						YJM1208									YJM1208				insertion A	S to P				T to G			M to I	YJM1208			T	G	L
YJM1242	N		Deletion		Deletion				YJM1242	A to G	S to N	A to T		G to A						YJM1242						D to G			YJM1242									T to G				YJM1242			T	G	L	H
YJM1244	N		Deletion		Deletion				YJM1244	A to G	S to N	A to T		G to A						YJM1244									YJM1244									T to G				YJM1244			T	G	L	H
YJM1248	N		Deletion						YJM1248	A to G		A to T		G to A						YJM1248			H to D					Insertion	YJM1248					S to P				T to G		TGC to TGA		YJM1248				G	L
YJM1250	N		Deletion		Deletion				YJM1250	A to G		A to T		G to A						YJM1250								Insertion	YJM1250									T to G				YJM1250			T	G	L	H
YJM1252	N		Deletion		Deletion				YJM1252	A to G		A to T		G to A						YJM1252			H to D	L to M					YJM1252	22 bp insertion at 407								T to G				YJM1252			T	G	L
YJM1273	N								YJM1273	A to G		A to T		G to A						YJM1273			H to D					Insertion	YJM1273				insertion A	S to P				T to G				YJM1273				G	L
YJM1304	C	V to M			Deletion				YJM1304	A to G		A to T		G to A						YJM1304									YJM1304				insertion A	S to P				T to G				YJM1304		108 bp deletion at 1572		G	L
YJM1307	C	V to M				Deletion			YJM1307	A to G		A to T		G to A						YJM1307			H to D				A 1 T (M to L )	Insertion	YJM1307				insertion A	S to P								YJM1307			T	G	L		R to K
YJM1311	C	V to M			Deletion				YJM1311	A to G	S to N	A to T		G to A						YJM1311									YJM1311									T to G				YJM1311		108 bp deletion at 1572	T	G	L
YJM1326	C	V to M				Deletion			YJM1326	A to G	S to N	A to T		G to A						YJM1326			H to D						YJM1326	12 bp deletion 157				S to P				T to G				YJM1326
YJM1332	N		Deletion		Deletion				YJM1332	A to G		A to T		G to A						YJM1332									YJM1332				insertion A					T to G				YJM1332			T	G	L	H
YJM1336	N		Deletion		Deletion				YJM1336	A to G	S to N	A to T		G to A						YJM1336						D to G			YJM1336	12 bp deletion 157								T to G				YJM1336			T	G	L	H
YJM1338	N								YJM1338	A to G		A to T		G to A						YJM1338			H to D					Insertion	YJM1338					S to P				T to G				YJM1338			T	G	L	H
YJM1341	N		Deletion		Deletion				YJM1341	A to G		A to T		G to A						YJM1341									YJM1341									T to G				YJM1341			T	G	L	H
YJM1342	N							188, 189 G to A both (TGG to TAA)	YJM1342	A to G		A to T		G to A						YJM1342			H to D					Insertion	YJM1342					S to P				T to G				YJM1342				G	L
YJM1355	N		Deletion					107G deletion	YJM1355	A to G	S to N	A to T		G to A						YJM1355								Insertion	YJM1355	12 bp deletion 157								T to G				YJM1355			T	G	L	H
YJM1356	N		Deletion		Deletion				YJM1356	A to G	S to N	A to T		G to A						YJM1356									YJM1356									T to G				YJM1356			T	G	L	H
YJM1381	N		Deletion			Deletion			YJM1381	A to G	S to N	A to T		G to A						YJM1381									YJM1381					S to P				T to G				YJM1381				G	L		R to K
YJM1383	N		Deletion			Deletion			YJM1383	A to G		A to T		G to A						YJM1383								Insertion	YJM1383									T to G				YJM1383			T	G	L	H
YJM1385	N	V to M				Deletion			YJM1385	A to G		A to T		G to A						YJM1385									YJM1385				insertion A	S to P				T to G				YJM1385				G	L	H	R to K
YJM1386	N		Deletion						YJM1386	A to G		A to T		G to A						YJM1386								Insertion	YJM1386					S to P				T to G				YJM1386			T	G	L	H
YJM1387	N		Deletion		Deletion				YJM1387	A to G	S to N	A to T		G to A						YJM1387			H to D						YJM1387									T to G				YJM1387			T	G	L	H
YJM1388	N	V to M				Deletion			YJM1388	A to G		A to T		G to A						YJM1388			H to D					Insertion	YJM1388				insertion A	S to P				T to G				YJM1388			T	G	L
YJM1389	N	V to M	Insertion A			Deletion			YJM1389	A to G		A to T		G to A						YJM1389			H to D					Insertion	YJM1389				insertion AA	S to P				T to G				YJM1389				G	L
YJM1399	N								YJM1399	A to G		A to T		G to A						YJM1399			H to D					Insertion	YJM1399					S to P				T to G				YJM1399				G	L
YJM1400	N	V to M				Deletion			YJM1400	A to G		A to T		G to A						YJM1400			H to D					Insertion	YJM1400				insertion A	S to P				T to G				YJM1400			T	G	L
YJM1401	N	V to M	Insertion AA						YJM1401	A to G		A to T		G to A						YJM1401			H to D					Insertion	YJM1401				insertion A	S to P				T to G				YJM1401				G	L
YJM1402	N								YJM1402	A to G		A to T		G to A						YJM1402			H to D					Insertion	YJM1402				insertion A	S to P				T to G				YJM1402				G	L
YJM1415	N		Deletion		Deletion				YJM1415	A to G	S to N	A to T		G to A						YJM1415									YJM1415									T to G				YJM1415			T	G	L	H
YJM1417	N		Deletion		Deletion				YJM1417	A to G		A to T		G to A						YJM1417						D to G			YJM1417									T to G				YJM1417			T	G	L	H
YJM1418	N								YJM1418	A to G		A to T		G to A						YJM1418			H to D					Insertion	YJM1418				insertion A	S to P				T to G				YJM1418				G	L
YJM1419	N	V to M				Deletion			YJM1419	A to G		A to T		G to A						YJM1419			H to D				Insertion of A at 207	Insertion	YJM1419				insertion A	S to P				T to G				YJM1419		108 bp deletion at 1572	T	G	L		R to K
YJM1433	N		Deletion			Deletion			YJM1433	A to G		A to T		G to A						YJM1433			H to D						YJM1433				insertion A					T to G				YJM1433			T	G	L	H
YJM1434	N								YJM1434	A to G		A to T		G to A						YJM1434			H to D					Insertion	YJM1434				insertion A	S to P				T to G				YJM1434				G	L
YJM1439	N		Deletion						YJM1439	A to G		A to T		G to A						YJM1439			H to D					Insertion	YJM1439					S to P			S to F	T to G		TGC to TGA		YJM1439				G	L
YJM1443	N								YJM1443	A to G		A to T		G to A						YJM1443			H to D					Insertion	YJM1443				insertion A	S to P				T to G				YJM1443				G	L
YJM1444	N								YJM1444	A to G		A to T		G to A						YJM1444			H to D					Insertion	YJM1444				insertion A	S to P				T to G				YJM1444				G	L
YJM1447	N			Deletion			Deletion		YJM1447	A to G		A to T		G to A						YJM1447			H to D					Insertion	YJM1447					S to P				T to G				YJM1447				G	L
YJM1450	C	V to M			Deletion				YJM1450	A to G		A to T		G to A						YJM1450			H to D				Insertion of A at 207		YJM1450									T to G				YJM1450			T	G	L	H
YJM1460	N	V to M				Deletion			YJM1460	A to G		A to T		G to A						YJM1460			H to D				Deletion 196 T	Insertion	YJM1460				insertion A	S to P				T to G				YJM1460			T	G	L
YJM1463	N				Deletion				YJM1463	A to G		A to T		G to A						YJM1463								Insertion	YJM1463					S to P				T to G				YJM1463				G	L
YJM1477	N		Deletion		Deletion				YJM1477	A to G	S to N	A to T		G to A						YJM1477						D to G	G 581 A (nonsense)		YJM1477									T to G				YJM1477			T	G	L	H
YJM1478	N	V to M							YJM1478	A to G		A to T		G to A						YJM1478			H to D					Insertion	YJM1478									T to G				YJM1478				G	L		R to K
YJM1479	N	V to M				Deletion			YJM1479	A to G		A to T		G to A						YJM1479			H to D					Insertion	YJM1479				insertion A	S to P				T to G				YJM1479			T	G	L
YJM1526	C		Deletion		Deletion				YJM1526	A to G	S to N	A to T		G to A						YJM1526						D to G			YJM1526									T to G				YJM1526			T	G	L	H
YJM1527	N								YJM1527	A to G		A to T		G to A						YJM1527			H to D					Insertion	YJM1527									T to G				YJM1527			T	G	L	H
YJM1549	N	V to M			Deletion				YJM1549	A to G		A to T		G to A						YJM1549			H to D					Insertion	YJM1549				insertion A					T to G				YJM1549			T	G	L
YJM1573	N								YJM1573	A to G		A to T		G to A						YJM1573			H to D					Insertion	YJM1573				insertion A	S to P				T to G				YJM1573				G	L
YJM1574	N		Deletion		Deletion				YJM1574	A to G	S to N	A to T		G to A						YJM1574									YJM1574			3 bp del 3282	insertion A					T to G				YJM1574			T	G	L	H
YJM1592	N	V to M				Deletion			YJM1592	A to G		A to T		G to A						YJM1592			H to D				Deletion 196 T	Insertion	YJM1592				insertion AA	S to P				T to G				YJM1592				G	L
YJM1615	C	V to M				Deletion			YJM1615	A to G		A to T		G to A						YJM1615									YJM1615					S to P				T to G				YJM1615			T	G	L
YJM189	N		Deletion		Deletion				YJM189	A to G	S to N	A to T		G to A						YJM189						D to G			YJM189									T to G				YJM189			T	G	L	H
YJM193	N		Deletion						YJM193	A to G	S to N	A to T		G to A						YJM193			H to D				Deletion 936 G		YJM193									T to G				YJM193				G	L
YJM195	N		Deletion						YJM195	A to G		A to T		G to A						YJM195			H to D					Insertion	YJM195				insertion A	S to P				T to G				YJM195				G	L
YJM244	C		Deletion		Deletion				YJM244	A to G	S to N	A to T		G to A						YJM244						D to G			YJM244	12 bp deletion 157								T to G				YJM244			T	G	L	H
YJM248	C		Deletion		Deletion				YJM248	A to G		A to T		G to A						YJM248			H to D	L to M					YJM248									T to G				YJM248			T	G	L
YJM270	N		Deletion						YJM270	A to G		A to T		G to A						YJM270			H to D						YJM270			3 bp del 3282						T to G				YJM270			T	G	L	H
YJM271	N		Deletion						YJM271	A to G	S to N	A to T		G to A						YJM271			H to D						YJM271			18 bp insertion 4452						T to G				YJM271				G	L
YJM320	C	V to M				Deletion			YJM320	A to G	S to N	A to T		G to A						YJM320			H to D						YJM320				insertion A					T to G				YJM320			T	G	L	H	R to K
YJM326	C	V to M				Deletion			YJM326	A to G	S to N	A to T		G to A						YJM326			H to D						YJM326					S to P								YJM326			T	G	L
YJM428	C	V to M			Deletion				YJM428	A to G	S to N	A to T		G to A						YJM428									YJM428									T to G				YJM428			T	G	L	H
YJM450	C	V to M			Deletion				YJM450	A to G	S to N	A to T		G to A						YJM450									YJM450									T to G				YJM450			T	G	L	H
YJM451	C	V to M			Deletion				YJM451	A to G		A to T		G to A						YJM451			H to D						YJM451				insertion A					T to G				YJM451			T	G	L
YJM453	C		Deletion		Deletion				YJM453	A to G	S to N	A to T		G to A						YJM453						D to G			YJM453				insertion A					T to G				YJM453			T	G	L	H
YJM456	C								YJM456	A to G		A to T		G to A						YJM456								Insertion	YJM456					S to P								YJM456			T	G	L	H
YJM470	C	V to M				Deletion			YJM470	A to G		A to T		G to A						YJM470			H to D					Insertion	YJM470				insertion A	S to P				T to G				YJM470				G	L	H
YJM541	C	V to M				Deletion			YJM541	A to G	S to N	A to T		G to A						YJM541									YJM541				insertion A	S to P				T to G				YJM541			T	G	L	H	R to K
YJM554	C	V to M				Deletion			YJM554	A to G	S to N	A to T		G to A						YJM554			H to D						YJM554				insertion A	S to P				T to G				YJM554			T	G	L	H	R to K
YJM555	C				Deletion				YJM555	A to G	S to N	A to T		G to A						YJM555									YJM555				insertion A					T to G				YJM555				G	L		R to K
YJM627	N		Deletion						YJM627	A to G	S to N	A to T		G to A						YJM627									YJM627					S to P				T to G		TGC to TGA		YJM627			T	G	L	H
YJM681	C		Deletion			Deletion			YJM681	A to G	S to N	A to T		G to A						YJM681									YJM681				insertion A					T to G				YJM681				G	L		R to K
YJM682	C	V to M				Deletion			YJM682	A to G	S to N	A to T		G to A						YJM682			H to D					Insertion	YJM682					S to P								YJM682			T	G	L	H
YJM683	C	V to M				Deletion			YJM683	A to G		A to T		G to A						YJM683									YJM683									T to G				YJM683			T	G	L	H
YJM689	C	V to M			Deletion				YJM689	A to G	S to N	A to T		G to A						YJM689			H to D						YJM689				insertion A					T to G				YJM689				G	L
YJM693	C		Deletion		Deletion				YJM693	A to G		A to T		G to A						YJM693									YJM693					S to P				T to G				YJM693			T	G	L
YJM969	C		Deletion		Deletion				YJM969	A to G	S to N	A to T		G to A						YJM969							Deletion 936 G		YJM969									T to G				YJM969			T	G	L
YJM972	C		Deletion		Deletion				YJM972	A to G	S to N	A to T		G to A						YJM972							Deletion 936 G		YJM972									T to G				YJM972			T	G	L	H
YJM975	C		Deletion		Deletion				YJM975	A to G	S to N	A to T		G to A						YJM975									YJM975									T to G				YJM975			T	G	L
YJM978	C		Deletion		Deletion				YJM978	A to G	S to N	A to T		G to A						YJM978									YJM978									T to G				YJM978			T	G	L
YJM981	C		Deletion		Deletion				YJM981	A to G	S to N	A to T		G to A						YJM981									YJM981									T to G				YJM981			T	G	L	H
YJM984	C		Deletion		Deletion				YJM984	A to G	S to N	A to T		G to A						YJM984									YJM984									T to G				YJM984			T	G	L	H
YJM987	C		Deletion		Deletion				YJM987	A to G	S to N	A to T		G to A						YJM987							Deletion 936 G		YJM987									T to G				YJM987			T	G	L	H
YJM990	C		Deletion		Deletion				YJM990	A to G	S to N	A to T		G to A						YJM990									YJM990									T to G				YJM990			T	G	L	H
YJM993	C		Deletion		Deletion				YJM993	A to G	S to N	A to T		G to A						YJM993									YJM993									T to G				YJM993			T	G	L
YJM996	C		Deletion		Deletion				YJM996	A to G	S to N	A to T		G to A						YJM996									YJM996									T to G				YJM996			T	G	L
Note: RAD5 yjm1400_Chr12_1 MSHIEQEERKRFFNDDLDTSETSLNFKSENKESFLFANSHN-DDDD-VVVSVSDTTEGEG Towards the beginning of this protein sequence, the number of D and V varies in different strains (indels). RAS2 5’UTR polyA according to the paper SK1 is supposed to have an insertion of A. But the SK1_v2 sequences that I have did not have that. SK1 from sgrp does not have that insertion either. The SK1 gene …
[truncated: 8 more columns]
