# Supplementary material for: The 100-genomes strains, an S. cerevisiae resource that illuminates its natural phenotypic and genotypic variation and emergence as an opportunistic pathogen
Source: HighWire-hosted journal article supplement (doi:10.1101/gr.185538.114), 2015-04-03
Supplement: Table_S14.xlsx [file Table_S14.xlsx]

## Sheet: Sheet1
	Strain	MRH1	LYS14	ARO3 origin	EHD3 origin	KRS1 origin	ENA	ENA copies
	S288C	s288c-like	s288c-like	recombinant	s288c-like (S par.)	s288c-like (S par.)	recombinant	3 copies			ARO3	recombinant
	yjm1078	s288c-like	s288c-like	recombinant	s288c-like (S par.)	s288c-like (S par.)	recombinant	10 copies				non-s288c-like (S cer. Type 2)
	yjm1083	s288c-like	s288c-like	recombinant	s288c-like (S par.)	s288c-like (S par.)	recombinant	2 copies				introgressed(Spar)
	yjm1129	s288c-like	s288c-like	recombinant	s288c-like (S par.)	s288c-like (S par.)	recombinant	2 copies
	yjm1133	s288c-like	s288c-like	non-s288c-like (S cer. )	non-s288c-like (S cer.)	non-s288c-like (S cer.)	ENA6	1 copy			EHD3	s288c-like (S par.)
	yjm1190	s288c-like	s288c-like	recombinant	s288c-like (S par.)	s288c-like (S par.)	recombinant	2 copies				non-s288c-like (S cer.)
	yjm1199	s288c-like	s288c-like	recombinant	non-s288c-like (S cer.)	non-s288c-like (S cer.)	ENA6	1 copy				recombinant
	yjm1202	s288c-like	s288c-like	non-s288c-like (S cer. )	non-s288c-like (S cer.)	non-s288c-like (S cer.)	ENA6	1 copy
	yjm1208	s288c-like	s288c-like	recombinant	s288c-like (S par.)	s288c-like (S par.)	recombinant	7 copies			KRS1	s288c-like (S par.)
	yjm1242	s288c-like	s288c-like	recombinant	s288c-like (S par.)	s288c-like (S par.)	recombinant	2 copies				non-s288c-like (S cer.)
	yjm1244	s288c-like	s288c-like	recombinant	s288c-like (S par.)	s288c-like (S par.)	recombinant	8 dopies				recombinant
	yjm1248	s288c-like	s288c-like	non-s288c-like (S cer. )	non-s288c-like (S cer.)	non-s288c-like (S cer.)	ENA6	1 copy
	yjm1250	s288c-like	s288c-like	recombinant	s288c-like (S par.)	s288c-like (S par.)	recombinant	2 copies			ENA	ENA6
	yjm1252	introgressed(Spar)	introgressed(Spar)	introgressed(Spar)	s288c-like (S par.)	s288c-like (S par.)	recombinant	1 copy				recombinant
	yjm1273	s288c-like	s288c-like	non-s288c-like (S cer. )	non-s288c-like (S cer.)	non-s288c-like (S cer.)	ENA6	1 copy
	yjm1304	s288c-like	s288c-like	non-s288c-like (S cer. )	non-s288c-like (S cer.)	non-s288c-like (S cer.)	ENA6	1 copy
	yjm1307	s288c-like	s288c-like	recombinant	s288c-like (S par.)	s288c-like (S par.)	recombinant	6 copies
	yjm1311	s288c-like	s288c-like	recombinant	s288c-like (S par.)	s288c-like (S par.)	recombinant	4 copies
	yjm1326	s288c-like	s288c-like	recombinant	s288c-like (S par.)	s288c-like (S par.)	recombinant	2 copies
	yjm1332	s288c-like	s288c-like	recombinant	s288c-like (S par.)	s288c-like (S par.)	recombinant	3 copies
	yjm1336	s288c-like	s288c-like	recombinant	s288c-like (S par.)	s288c-like (S par.)	recombinant	1 copy
	yjm1338	s288c-like	s288c-like	non-s288c-like (S cer. )	non-s288c-like (S cer.)	non-s288c-like (S cer.)	ENA6	1 copy
	yjm1341	s288c-like	s288c-like	recombinant	s288c-like (S par.)	s288c-like (S par.)	recombinant	7 copies
	yjm1342	s288c-like	s288c-like	non-s288c-like (S cer. )	non-s288c-like (S cer.)	non-s288c-like (S cer.)	ENA6	1 copy
	yjm1355	s288c-like	s288c-like	recombinant	s288c-like (S par.)	s288c-like (S par.)	recombinant	6 copies
	yjm1356	s288c-like	s288c-like	recombinant	s288c-like (S par.)	s288c-like (S par.)	recombinant	2 copies
	yjm1381	s288c-like	s288c-like	recombinant	s288c-like (S par.)	s288c-like (S par.)	recombinant	2 copies
	yjm1383	s288c-like	s288c-like	recombinant	s288c-like (S par.)	s288c-like (S par.)	recombinant	1 copy
	yjm1385	s288c-like	s288c-like	recombinant	s288c-like (S par.)	s288c-like (S par.)	recombinant	3 copies
	yjm1386	s288c-like	s288c-like	recombinant	s288c-like (S par.)	recombinant	ENA6	1 copy
	yjm1387	s288c-like	s288c-like	recombinant	s288c-like (S par.)	s288c-like (S par.)	recombinant	6 copies
	yjm1388	s288c-like	s288c-like	non-s288c-like (S cer. )	non-s288c-like (S cer.)	non-s288c-like (S cer.)	ENA6	1 copy
	yjm1389	s288c-like	s288c-like	non-s288c-like (S cer. )	non-s288c-like (S cer.)	non-s288c-like (S cer.)	ENA6	1 copy
	yjm1399	s288c-like	s288c-like	non-s288c-like (S cer. )	non-s288c-like (S cer.)	non-s288c-like (S cer.)	ENA6	1 copy
	yjm1400	s288c-like	s288c-like	non-s288c-like (S cer. )	recombinant	s288c-like (S par.)	recombinant	1 copy
	yjm1401	s288c-like	s288c-like	non-s288c-like (S cer. )	non-s288c-like (S cer.)	non-s288c-like (S cer.)	ENA6	1 copy
	yjm1402	s288c-like	s288c-like	non-s288c-like (S cer. )	non-s288c-like (S cer.)	non-s288c-like (S cer.)	ENA6	1 copy
	yjm1415	s288c-like	s288c-like	recombinant	s288c-like (S par.)	s288c-like (S par.)	recombinant	2 copies
	yjm1417	s288c-like	s288c-like	recombinant	s288c-like (S par.)	s288c-like (S par.)	recombinant	2 copies
	yjm1418	s288c-like	s288c-like	non-s288c-like (S cer. )	non-s288c-like (S cer.)	non-s288c-like (S cer.)	ENA6	1 copy
	yjm1419	s288c-like	s288c-like	non-s288c-like (S cer. )	non-s288c-like (S cer.)	non-s288c-like (S cer.)	ENA6	1 copy
	yjm1433	s288c-like	s288c-like	non-s288c-like (S cer. )	non-s288c-like (S cer.)	non-s288c-like (S cer.)	ENA6	1 copy
	yjm1434	s288c-like	s288c-like	non-s288c-like (S cer. )	non-s288c-like (S cer.)	non-s288c-like (S cer.)	ENA6	1 copy
	yjm1439	s288c-like	s288c-like	non-s288c-like (S cer. )	non-s288c-like (S cer.)	non-s288c-like (S cer.)	ENA6	1 copy
	yjm1443	s288c-like	s288c-like	non-s288c-like (S cer. )	non-s288c-like (S cer.)	non-s288c-like (S cer.)	ENA6	1 copy
	yjm1444	s288c-like	s288c-like	non-s288c-like (S cer. )	non-s288c-like (S cer.)	non-s288c-like (S cer.)	ENA6	1 copy
	yjm1447	s288c-like	s288c-like	non-s288c-like (S cer. )	non-s288c-like (S cer.)	non-s288c-like (S cer.)	ENA6	1 copy
	yjm1450	s288c-like	s288c-like	recombinant	s288c-like (S par.)	s288c-like (S par.)	recombinant	2 copies
	yjm1460	s288c-like	s288c-like	non-s288c-like (S cer. )	non-s288c-like (S cer.)	non-s288c-like (S cer.)	ENA6	1 copy
	yjm1463	s288c-like	s288c-like	recombinant	recombinant	non-s288c-like (S cer.)	ENA6	1 copy
	yjm1477	s288c-like	s288c-like	recombinant	s288c-like (S par.)	s288c-like (S par.)	recombinant	2 copies
	yjm1478	s288c-like	s288c-like	recombinant	s288c-like (S par.)	s288c-like (S par.)	recombinant	2 copies
	yjm1479	s288c-like	s288c-like	non-s288c-like (S cer. )	recombinant	s288c-like (S par.)	recombinant	1 copy
	yjm1526	s288c-like	s288c-like	recombinant	s288c-like (S par.)	s288c-like (S par.)	recombinant	2 copies
	yjm1527	s288c-like	s288c-like	non-s288c-like (S cer. )	non-s288c-like (S cer.)	non-s288c-like (S cer.)	ENA6	1 copy
	yjm1549	s288c-like	s288c-like	recombinant	s288c-like (S par.)	s288c-like (S par.)	recombinant	2 copies
	yjm1573	s288c-like	s288c-like	non-s288c-like (S cer. )	non-s288c-like (S cer.)	non-s288c-like (S cer.)	ENA6	1 copy
	yjm1574	s288c-like	s288c-like	recombinant	s288c-like (S par.)	s288c-like (S par.)	recombinant	2 copies
	yjm1592	s288c-like	s288c-like	non-s288c-like (S cer. )	non-s288c-like (S cer.)	non-s288c-like (S cer.)	ENA6	1 copy
	yjm1615	s288c-like	s288c-like	recombinant	s288c-like (S par.)	s288c-like (S par.)	recombinant	3 copies
	yjm189	s288c-like	s288c-like	recombinant	s288c-like (S par.)	s288c-like (S par.)	recombinant	2 copies
	yjm193	s288c-like	s288c-like	recombinant	s288c-like (S par.)	s288c-like (S par.)	recombinant	2 copies
	yjm195	s288c-like	s288c-like	non-s288c-like (S cer. )	non-s288c-like (S cer.)	non-s288c-like (S cer.)	ENA6	1 copy
	yjm244	s288c-like	s288c-like	recombinant	s288c-like (S par.)	s288c-like (S par.)	recombinant	8 copies
	yjm248	s288c-like	introgressed(S par.)	recombinant	s288c-like (S par.)	s288c-like (S par.)	recombinant	14 copies
	yjm270	s288c-like	s288c-like	recombinant	s288c-like (S par.)	s288c-like (S par.)	recombinant	2 copies
	yjm271	s288c-like	s288c-like	recombinant	s288c-like (S par.)	s288c-like (S par.)	recombinant	4 copies
	yjm320	s288c-like	s288c-like	non-s288c-like (S cer. )	non-s288c-like (S cer.)	non-s288c-like (S cer.)	ENA6	1 copy
	yjm326	s288c-like	s288c-like	recombinant	s288c-like (S par.)	s288c-like (S par.)	recombinant	4 copies
	yjm428	s288c-like	s288c-like	recombinant	s288c-like (S par.)	s288c-like (S par.)	recombinant	2 copies
	yjm450	s288c-like	s288c-like	recombinant	s288c-like (S par.)	s288c-like (S par.)	recombinant	2 copies
	yjm451	s288c-like	s288c-like	non-s288c-like (S cer. )	s288c-like (S par.)	s288c-like (S par.)	recombinant	2 copies
	yjm453	s288c-like	s288c-like	recombinant	s288c-like (S par.)	s288c-like (S par.)	recombinant	1 copy
	yjm456	s288c-like	s288c-like	non-s288c-like (S cer. )	non-s288c-like (S cer.)	non-s288c-like (S cer.)	ENA6	1 copy
	yjm470	s288c-like	s288c-like	non-s288c-like (S cer. )	non-s288c-like (S cer.)	non-s288c-like (S cer.)	ENA6	1 copy
	yjm541	s288c-like	s288c-like	non-s288c-like (S cer. )	non-s288c-like (S cer.)	non-s288c-like (S cer.)	ENA6	1 copy
	yjm554	s288c-like	s288c-like	non-s288c-like (S cer. )	non-s288c-like (S cer.)	non-s288c-like (S cer.)	ENA6	1 copy
	yjm555	s288c-like	s288c-like	non-s288c-like (S cer. )	non-s288c-like (S cer.)	non-s288c-like (S cer.)	ENA6	1 copy
	yjm627	s288c-like	s288c-like	non-s288c-like (S cer. )	non-s288c-like (S cer.)	non-s288c-like (S cer.)	ENA6	1 copy
	yjm681	s288c-like	s288c-like	recombinant	s288c-like (S par.)	s288c-like (S par.)	recombinant	4 copies
	yjm682	s288c-like	s288c-like	non-s288c-like (S cer. )	non-s288c-like (S cer.)	non-s288c-like (S cer.)	ENA6	1 copy
	yjm683	s288c-like	s288c-like	non-s288c-like (S cer. )	non-s288c-like (S cer.)	non-s288c-like (S cer.)	ENA6	1 copy
	yjm689	s288c-like	s288c-like	recombinant	s288c-like (S par.)	s288c-like (S par.)	recombinant	1 copy
	yjm693	s288c-like	s288c-like	recombinant	s288c-like (S par.)	s288c-like (S par.)	recombinant	1 copy
	yjm969	s288c-like	s288c-like	recombinant	s288c-like (S par.)	s288c-like (S par.)	recombinant	2 copies
	yjm972	s288c-like	s288c-like	recombinant	s288c-like (S par.)	s288c-like (S par.)	recombinant	5 copies
	yjm975	s288c-like	s288c-like	recombinant	s288c-like (S par.)	s288c-like (S par.)	recombinant	2 copies
	yjm978	s288c-like	s288c-like	recombinant	s288c-like (S par.)	s288c-like (S par.)	recombinant	2 copies
	yjm981	s288c-like	s288c-like	recombinant	s288c-like (S par.)	s288c-like (S par.)	recombinant	6 copies
	yjm984	s288c-like	s288c-like	recombinant	s288c-like (S par.)	s288c-like (S par.)	recombinant	3 copies
	yjm987	s288c-like	s288c-like	recombinant	s288c-like (S par.)	s288c-like (S par.)	recombinant	6 copies
	yjm990	s288c-like	s288c-like	recombinant	s288c-like (S par.)	s288c-like (S par.)	recombinant	2 copies
	yjm993	s288c-like	s288c-like	recombinant	s288c-like (S par.)	s288c-like (S par.)	recombinant	2 copies
	yjm996	s288c-like	s288c-like	recombinant	s288c-like (S par.)	s288c-like (S par.)	recombinant	2 copies
