# Supplementary material for: The 100-genomes strains, an S. cerevisiae resource that illuminates its natural phenotypic and genotypic variation and emergence as an opportunistic pathogen
Source: HighWire-hosted journal article supplement (doi:10.1101/gr.185538.114), 2015-04-03
Supplement: Table_S15.xlsx [file Table_S15.xlsx]

## Sheet: CUP1 copy # & repeats types
CUP1 copy numbers and the five types of junction sequences of the CUP1 repeats in the 93 strains. The CUP1 copy numbers for the 93 sequenced strains from this work were determined by the CUP1 sequence coverage analysis. For YJM1077 (SK1) and YJM1281 (YPS163), CUP1 copy number was determined by PCR. For S288C, CUP1 copy number was estimated from [63].
strain	CUP1 copies	Junction Sequence types
S288C	10-15	type 1							Types	Junction sequence
YJM1077	1								type1	GTACCATGAATAGCTTTTTTTTTTTTTTTTATTCGAAATCTGGGGATTCT
YJM1078	5		type 2						type2	AATAATTTTCATCAGATCCTTTTCATAGAGTGCGGTGCATATGTATATATCTATA
YJM1083	3			type 3					type3	CGTATAGCGTCCAAATGTCGGTAATGGGATCGGCTTACTAATTATAAATTTGAATTTC
YJM1129	6	type 1		type 3		type 5			type4	AAATTTGTATAAACAATGGTATTGATAAATATGTATATATCTATATA
YJM1133	2		type 2						type5	CTAATTATAAAATGCATCATAGAAATCGTCGTTGAATGTCCATTTGGGTAATTTAG
YJM1190	8			type 3
YJM1199	5			type 3
YJM1202	4			type 3
YJM1208	4	type 1		type 3
YJM1242	1
YJM1244	2					type 5
YJM1248	1
YJM1250	2	type 1
YJM1252	1
YJM1273	1
YJM1281	1
YJM1304	1
YJM1307	4				type 4
YJM1311	2			type 3
YJM1326	15			type 3
YJM1332	2					type 5
YJM1336	5		type 2
YJM1338	5		type 2
YJM1341	3		type 2
YJM1342	1
YJM1355	2					type 5
YJM1356	1
YJM1381	9			type 3
YJM1383	3	type 1
YJM1385	2	type 1
YJM1386	2	type 1
YJM1387	3					type 5
YJM1388	2			type 3
YJM1389	1
YJM1399	1
YJM1400	1
YJM1401	1
YJM1402	1
YJM1415	1
YJM1417	2					type 5
YJM1418	1
YJM1419	4			type 3
YJM1433	4					type 5
YJM1434	1
YJM1439	1
YJM1443	1
YJM1444	1
YJM1447	1
YJM1450	5			type 3
YJM1460	5			type 3
YJM1463	3					type 5
YJM1477	1
YJM1478	3				type 4
YJM1479	1
YJM1526	4	type 1				type 5
YJM1527	5		type 2	type 3
YJM1549	18			type 3
YJM1573	1
YJM1574	12		type 2
YJM1592	1
YJM1615	2	type 1
YJM189	6		type 2
YJM193	8				type 4
YJM195	1
YJM244	3		type 2
YJM248	8					type 5
YJM270	1
YJM271	8				type 4
YJM320	2			type 3
YJM326	1
YJM428	3	type 1
YJM450	4			type 3
YJM451	2			type 3
YJM453	3		type 2
YJM456	5					type 5
YJM470	1
YJM541	5	type 1				type 5
YJM554	1
YJM555	4		type 2	type 3
YJM627	5		type 2
YJM681	6			type 3
YJM682	6	type 1		type 3
YJM683	5	type 1
YJM689	2			type 3
YJM693	15			type 3
YJM969	4			type 3		type 5
YJM972	10		type 2
YJM975	10		type 2
YJM978	2					type 5
YJM981	4					type 5
YJM984	4					type 5
YJM987	4		type 2			type 5
YJM990	8		type 2
YJM993	4					type 5
YJM996	12		type 2
