# Supplementary material for: The 100-genomes strains, an S. cerevisiae resource that illuminates its natural phenotypic and genotypic variation and emergence as an opportunistic pathogen
Source: HighWire-hosted journal article supplement (doi:10.1101/gr.185538.114), 2015-04-03
Supplement: Table_S16.xlsx [file Table_S16.xlsx]

## Sheet: Sheet1
The numbers of SNPs and indels within the 218 kb region of the 93 strains as compared to S288C.
strains	SNP	snprate	SNPCDS	snpcdsrate	SNPNONSYN		SNP-prestop	SNP-readthru	Del	DelCDS	DelFrameShift	Ins	InsCDS	InsFrameShift	total snp indel	%total snp indel			chr	length	start	end	coding region length
yjm1078	1278	0.585063	901	0.514631	309	0.176494	0	0	40	4	1	29	3	0	1347	0.616651			1	17671	51855	69525	14526
yjm1083	949	0.434448	638	0.364411	224	0.127944	1	0	36	2	1	44	2	0	1029	0.471072			2	15852	170623	186474	12915
yjm1129	880	0.40286	615	0.351274	216	0.123374	0	0	32	2	1	28	3	1	940	0.430328			3	8070	96281	104350	7380
yjm1133	904	0.413847	622	0.355272	203	0.115949	0	0	35	3	1	28	2	0	967	0.442689			4	16175	300214	316388	10515
yjm1190	931	0.426208	662	0.378119	219	0.125088	0	0	30	3	1	29	1	0	990	0.453218			5	17512	256375	273886	9087
yjm1199	1154	0.528296	802	0.458084	252	0.143937	0	0	34	3	1	33	0	0	1221	0.558969			6	17894	36803	54696	14487
yjm1202	999	0.457338	700	0.399824	216	0.123374	0	0	34	4	0	28	0	0	1061	0.485721			7	17876	35653	53528	15822
yjm1208	1075	0.49213	750	0.428383	234	0.133655	0	1	37	3	1	34	2	0	1146	0.524634			8	18805	314116	332920	15405
yjm1242	876	0.401029	614	0.350703	225	0.128515	0	0	31	2	1	25	2	0	932	0.426666			9	16870	85366	102235	12867
yjm1244	871	0.39874	602	0.343849	216	0.123374	0	0	33	3	1	25	2	0	929	0.425292			10	19628	295245	314872	17679
yjm1248	1228	0.562173	843	0.481502	266	0.151933	0	0	42	4	1	41	4	1	1311	0.60017			11	7339	246138	253476	6102
yjm1250	950	0.434906	656	0.374692	236	0.134798	0	0	28	2	1	30	3	0	1008	0.461458			12	10515	53131	63645	10236
yjm1252	1162	0.531959	812	0.463796	286	0.163357	0	0	32	3	1	31	4	0	1225	0.5608			13	7530	54793	62322	6210
yjm1273	1129	0.516851	789	0.450659	236	0.134798	0	0	40	3	1	33	2	0	1202	0.550271			14	8822	54122	62943	6141
yjm1304	927	0.424377	677	0.386687	211	0.120518	0	1	38	2	1	28	2	0	993	0.454591			15	8899	56452	65350	8028
yjm1307	1155	0.528754	843	0.481502	280	0.15993	0	0	35	4	1	30	0	0	1220	0.558511			16	8980	150614	159593	7677
yjm1311	1079	0.493962	779	0.444947	242	0.138225	1	0	32	3	1	37	2	0	1148	0.52555			total bases	218438			175077
yjm1326	1031	0.471987	749	0.427812	251	0.143365	0	0	34	3	1	31	2	0	1096	0.501744			total genes	124
yjm1332	888	0.406523	621	0.354701	233	0.133084	0	0	31	2	1	25	2	0	944	0.432159			total bases CDS	175077
yjm1336	871	0.39874	611	0.348989	220	0.125659	0	0	34	2	1	23	2	0	928	0.424835
yjm1338	1028	0.470614	733	0.418673	219	0.125088	0	0	35	3	1	37	3	1	1100	0.503575
yjm1341	895	0.409727	621	0.354701	231	0.131942	0	0	29	2	1	29	2	0	953	0.436279
yjm1342	1289	0.590099	930	0.531195	280	0.15993	0	0	50	4	1	34	3	1	1373	0.628554
yjm1355	933	0.427123	660	0.376977	225	0.128515	0	0	38	2	1	30	3	0	1001	0.458254
yjm1356	866	0.396451	600	0.342706	211	0.120518	0	0	29	2	1	25	2	0	920	0.421172
yjm1381	849	0.388669	563	0.321573	188	0.107381	1	0	37	2	1	24	1	0	910	0.416594
yjm1383	1066	0.48801	736	0.420386	265	0.151362	0	0	34	2	1	40	2	0	1140	0.521887
yjm1385	1040	0.476108	710	0.405536	247	0.141081	0	0	43	4	2	31	3	1	1114	0.509985
yjm1386	1085	0.496708	775	0.442662	255	0.14565	0	0	32	3	1	23	3	0	1140	0.521887
yjm1387	839	0.384091	595	0.33985	223	0.127373	0	0	31	1	3	24	2	0	894	0.409269
yjm1388	1144	0.523718	810	0.462654	258	0.147364	0	0	41	4	1	36	2	1	1221	0.558969
yjm1389	1121	0.513189	785	0.448374	256	0.146221	0	0	38	3	2	37	2	1	1196	0.547524
yjm1399	1475	0.675249	1071	0.611731	343	0.195914	0	0	61	7	1	32	5	0	1568	0.717824
yjm1400	1112	0.509069	774	0.442091	215	0.122803	1	0	45	3	1	29	3	1	1186	0.542946
yjm1401	1117	0.511358	774	0.442091	231	0.131942	0	0	43	3	2	34	5	1	1194	0.546608
yjm1402	1190	0.544777	852	0.486643	228	0.130228	0	0	45	4	1	34	3	0	1269	0.580943
yjm1415	870	0.398282	616	0.351845	230	0.131371	0	0	29	2	0	24	2	0	923	0.422546
yjm1417	882	0.403776	616	0.351845	227	0.129657	0	0	33	2	1	22	2	0	937	0.428955
yjm1418	1335	0.611157	927	0.529481	266	0.151933	0	0	50	5	1	44	7	1	1429	0.65419
yjm1419	1103	0.504949	764	0.436379	217	0.123945	0	0	35	3	1	36	4	1	1174	0.537452
yjm1433	1013	0.463747	727	0.415246	239	0.136511	0	0	35	1	1	31	2	0	1079	0.493962
yjm1434	1130	0.517309	789	0.450659	236	0.134798	0	0	40	3	2	33	2	0	1203	0.550728
yjm1439	1228	0.562173	843	0.481502	266	0.151933	0	0	44	4	1	40	4	1	1312	0.600628
yjm1443	1096	0.501744	791	0.451801	211	0.120518	0	0	47	4	1	28	3	1	1171	0.536079
yjm1444	1122	0.513647	792	0.452372	233	0.133084	1	0	44	3	1	34	2	0	1200	0.549355
yjm1447	1361	0.62306	958	0.547188	270	0.154218	0	0	51	6	1	40	2	0	1452	0.66472
yjm1450	908	0.415679	656	0.374692	222	0.126801	0	0	29	4	0	26	2	0	963	0.440857
yjm1460	1157	0.52967	811	0.463225	265	0.151362	0	0	38	2	1	35	2	1	1230	0.563089
yjm1463	994	0.455049	700	0.399824	270	0.154218	0	0	32	3	1	43	3	0	1069	0.489384
yjm1477	876	0.401029	613	0.350132	224	0.127944	0	0	30	2	1	24	2	0	930	0.42575
yjm1478	983	0.450013	692	0.395255	223	0.127373	0	0	30	3	0	31	2	0	1044	0.477939
yjm1479	1113	0.509527	774	0.442091	215	0.122803	1	0	44	3	1	30	3	1	1187	0.543404
yjm1526	889	0.40698	628	0.358699	224	0.127944	0	0	30	2	1	30	3	1	949	0.434448
yjm1527	1038	0.475192	719	0.410676	228	0.130228	0	0	38	2	1	33	4	1	1109	0.507696
yjm1549	1029	0.471072	726	0.414675	243	0.138796	0	0	35	1	1	31	3	0	1095	0.501286
yjm1573	1188	0.543861	850	0.485501	226	0.129086	0	0	46	4	0	33	3	0	1267	0.580027
yjm1574	896	0.410185	638	0.364411	236	0.134798	0	0	32	2	1	27	2	0	955	0.437195
yjm1592	1117	0.511358	779	0.444947	249	0.142223	0	0	38	3	1	37	2	1	1192	0.545693
yjm1615	1052	0.481601	727	0.415246	211	0.120518	0	1	40	3	1	35	2	0	1127	0.515936
yjm189	883	0.404234	620	0.35413	232	0.132513	0	0	31	2	1	26	2	0	940	0.430328
yjm193	916	0.419341	647	0.369552	223	0.127373	0	0	30	0	0	26	1	0	972	0.444978
yjm195	1307	0.598339	900	0.51406	290	0.165641	1	0	44	5	0	35	3	1	1386	0.634505
yjm244	861	0.394162	595	0.33985	212	0.12109	0	0	31	2	0	26	2	0	918	0.420257
yjm248	1272	0.582316	894	0.510632	305	0.174209	0	0	40	5	1	29	3	0	1341	0.613904
yjm270	948	0.43399	673	0.384402	259	0.147935	0	0	35	3	1	28	2	0	1011	0.462832
yjm271	902	0.412932	629	0.35927	214	0.122232	1	0	30	0	1	19	2	1	951	0.435364
yjm320	1006	0.460543	731	0.417531	231	0.131942	0	0	39	2	1	20	2	0	1065	0.487553
yjm326	1006	0.460543	707	0.403822	224	0.127944	0	0	36	3	1	30	2	0	1072	0.490757
yjm428	1020	0.466952	701	0.400395	218	0.124517	0	0	41	3	1	37	4	0	1098	0.50266
yjm450	1002	0.458711	694	0.396397	207	0.118234	0	0	38	2	1	27	4	1	1067	0.488468
yjm451	1152	0.527381	825	0.471221	258	0.147364	0	0	39	3	1	37	2	0	1228	0.562173
yjm453	864	0.395536	600	0.342706	220	0.125659	0	0	33	2	1	26	2	0	923	0.422546
yjm456	909	0.416136	624	0.356415	204	0.11652	0	0	38	2	1	30	3	1	977	0.447267
yjm470	1106	0.506322	781	0.446089	254	0.145079	0	0	42	4	1	40	2	0	1188	0.543861
yjm541	1030	0.47153	757	0.432381	233	0.133084	0	0	32	3	0	25	2	0	1087	0.497624
yjm554	1128	0.516394	831	0.474648	263	0.15022	0	0	34	3	1	27	2	0	1189	0.544319
yjm555	941	0.430786	677	0.386687	220	0.125659	0	0	32	3	1	34	2	0	1007	0.461
yjm627	1109	0.507696	788	0.450088	256	0.146221	0	0	38	4	1	32	3	1	1179	0.539741
yjm681	1063	0.486637	766	0.437522	236	0.134798	0	0	38	3	1	35	3	0	1136	0.520056
yjm682	999	0.457338	683	0.390114	226	0.129086	0	0	38	3	1	35	2	0	1072	0.490757
yjm683	1015	0.464663	705	0.40268	209	0.119376	0	0	36	3	1	39	1	0	1090	0.498997
yjm689	1065	0.487553	779	0.444947	244	0.139367	0	0	34	1	1	33	4	1	1132	0.518225
yjm693	898	0.411101	619	0.353559	214	0.122232	0	0	27	1	1	26	3	0	951	0.435364
yjm969	882	0.403776	617	0.352416	227	0.129657	0	0	29	2	1	28	2	0	939	0.42987
yjm972	884	0.404691	613	0.350132	227	0.129657	0	0	32	2	1	28	2	0	944	0.432159
yjm975	873	0.399656	602	0.343849	217	0.123945	0	0	30	2	1	30	2	0	933	0.427123
yjm978	875	0.400571	608	0.347276	221	0.12623	0	0	29	2	1	27	2	0	931	0.426208
yjm981	872	0.399198	605	0.345562	220	0.125659	0	0	34	2	1	27	2	0	933	0.427123
yjm984	878	0.401945	613	0.350132	227	0.129657	0	0	31	2	2	27	2	0	936	0.428497
yjm987	878	0.401945	610	0.348418	223	0.127373	0	0	31	2	1	28	2	0	937	0.428955
yjm990	880	0.40286	607	0.346705	216	0.123374	0	0	33	2	1	27	2	0	940	0.430328
yjm993	881	0.403318	610	0.348418	222	0.126801	0	0	32	2	1	28	2	0	941	0.430786
yjm996	871	0.39874	605	0.345562	220	0.125659	0	0	33	2	1	27	2	0	931	0.426208
Average	1020.88	0.467355	717.495	0.409817	236.054	0.134829			36.1183			30.7204			1087.72	0.497954
