# Supplementary material for: The 100-genomes strains, an S. cerevisiae resource that illuminates its natural phenotypic and genotypic variation and emergence as an opportunistic pathogen
Source: HighWire-hosted journal article supplement (doi:10.1101/gr.185538.114), 2015-04-03
Supplement: Table_S17.xlsx [file Table_S17.xlsx]

## Sheet: biofilm
strain	biofilm
S288c	0.09119
SK1	0.18787
RM11	0.08544
Sigma1278b	0.10106
YPS163	0.08812
YJM789	0.087
M22	0.10269
YJM189	0.09144
YJM193	0.11075
YJM195	0.08488
YJM244	0.11956
YJM248	0.08887
YJM270	0.32512
YJM271	0.11875
YJM320	0.22506
YJM326	0.1105
YJM428	0.09069
YJM450	0.09219
YJM451	0.09744
YJM453	0.09494
YJM456	0.09306
YJM470	0.08319
YJM541	0.10325
YJM554	0.11575
YJM555	0.08794
YJM627	0.10287
YJM681	0.09431
YJM682	0.10556
YJM683	0.11431
YJM689	0.09237
YJM693	0.08719
YJM969	0.08894
YJM972	0.08894
YJM975	0.08869
YJM978	0.091
YJM981	0.09275
YJM984	0.08919
YJM987	0.08438
YJM990	0.08819
YJM993	0.09169
YJM996	0.09119
YJM1078	0.08906
YJM1083	0.14819
YJM1129	0.10781
YJM1133	0.158
YJM1190	0.32794
YJM1199	0.12881
YJM1202	0.10525
YJM1208	0.09212
YJM1242	0.15025
YJM1244	0.14275
YJM1248	0.13731
YJM1252	0.08594
YJM1273	0.08894
YJM1304	0.08419
YJM1307	0.13256
YJM1311	0.09469
YJM1326	0.091
YJM1332	0.08612
YJM1336	0.08687
YJM1338	0.11
YJM1341	0.09438
YJM1342	0.10038
YJM1355	0.08937
YJM1356	0.11238
YJM1381	0.09037
YJM1383	0.09081
YJM1385	0.13644
YJM1386	0.0865
YJM1387	0.1115
YJM1389	0.08481
YJM1399	0.08931
YJM1400	0.11356
YJM1401	0.19806
YJM1402	0.08812
YJM1415	0.392
YJM1417	0.08731
YJM1418	0.08569
YJM1434	0.09212
YJM1439	0.11269
YJM1443	0.09137
YJM1444	0.118
YJM1447	0.096
YJM1450	0.17875
YJM1460	0.0825
YJM1463	0.08456
YJM1477	0.11787
YJM1478	0.12119
YJM1479	0.10431
YJM1526	0.09469
YJM1527	0.17744
YJM1549	0.08694
YJM1573	0.08419
YJM1574	0.08381
YJM1592
YJM1628	0.08283
YJM1846	0.09
YJM1847	0.161
YJM1869	0.08733
YJM1870	0.083

## Sheet: copper
strain	0.075mM copper sulfate	0.1mM copper sulfate	0.25mM copper sulfate
S288c	0.99514	1.01657	0.51765
SK1	0	0	0
RM11	1.0583	1.04856	0.253
Sigma1278b	1.14931	1.16556	0.19746
YPS163	0.01253	0.0029	0.01431
YJM789	0.58859	0.51704	0.02412
M22	0	0.00713	0
YJM189	1.13063	1.11597	0.11658
YJM193	0.96819	0.89733	0.06971
YJM195	0.03705	0.03311	0.00018
YJM244	0.45789	0.09975	0.00035
YJM248	0.72965	0.3094	0.01203
YJM270	0.00708	0.00075	0.00074
YJM271	0.7259	0.60533	0.00827
YJM320	0.52832	0.10713	0.00308
YJM326	0.18575	0.15449	0.01182
YJM428	0.89298	0.81835	0.11327
YJM450	0.75942	0.6549	0.00368
YJM451	0.30212	0.25301	0.02972
YJM453	0.65251	0.61371	0.01957
YJM456	1.06246	1.0606	0.07883
YJM470	0.01065	0.00947	0.00717
YJM541	1.04401	1.05336	0.01327
YJM554	0.06328	0.08706	0.02158
YJM555	0.87602	0.83445	0.03943
YJM627	0.67262	0.51941	0
YJM681	0.20989	0.17897	0.00053
YJM682	1.04834	1.02879	0.17934
YJM683	1.03547	1.01425	0.00666
YJM689	0.01485	0.07031	0.00632
YJM693	1.04242	1.01854	0.22986
YJM969	0.78966	0.6161	0.00608
YJM972	1.03941	1.01325	0.43648
YJM975	1.03776	1.02551	0.31087
YJM978	0.23749	0.19705	0.00191
YJM981	1.09114	1.07811	0.0276
YJM984	0.90727	0.71904	0.03871
YJM987	0.89214	0.74506	0.02119
YJM990	1.0279	1.02886	0.35968
YJM993	0.73618	0.52253	0.03148
YJM996	1.02585	1.01593	0.4966
YJM1078	1.09371	1.07449	0.04558
YJM1083	0.42935	0.33956	0.00318
YJM1129	0.34527	0.3584	0.02725
YJM1133	0.6701	0.48817	0.00075
YJM1190	1.07362	1.05835	0.00809
YJM1199	0.86245	0.79733	0
YJM1202	0.55885	0.48729	0.0103
YJM1208	1.13472	1.04217	0.01439
YJM1242	0	0	0.00137
YJM1244	1.02244	0.91895	0.00325
YJM1248	0.02505	0.02889	0.00019
YJM1252	0.36804	0.13559	0.00074
YJM1273	0.07412	0.06222	0.0115
YJM1304	0.01838	0.02595	0.01163
YJM1307	0.99756	0.93709	0.01779
YJM1311	0.00041	0.0015	0.00605
YJM1326	1.03416	1.02654	0.06229
YJM1332	0.39828	0.28536	0.02152
YJM1336	1.03497	0.99805	0.01324
YJM1338	1.0095	0.90635	0.00621
YJM1341	1.00923	0.85473	0.00608
YJM1342	0	0	0.00037
YJM1355	0.01715	0.00207	0
YJM1356	0	0	0.00376
YJM1381	1.03659	1.0265	0.08646
YJM1383	0.2071	0.17019	0.04036
YJM1385	0.37174	0.34097	0.03614
YJM1386	0.03015	0.01836	0.00073
YJM1387	0.04049	0.00545	0
YJM1389	0.09566	0.03698	0.03666
YJM1399	0.05759	0.08864	0.00218
YJM1400	0.04365	0.11672	0.0025
YJM1401	0.00457	0.00072	0.00057
YJM1402	0.05332	0.10016	0.01369
YJM1415	0	0.00157	0.00311
YJM1417	0.27118	0.19729	0.01409
YJM1418	0.05177	0.02357	0.00052
YJM1434	0.06787	0.0393	0.00117
YJM1439	0	0	0
YJM1443	0.08643	0.07274	0.00255
YJM1444	0	0	0.00269
YJM1447	0.00913	0.00305	0.0224
YJM1450	0.72929	0.5719	0.02927
YJM1460	1.05309	0.99448	0.09276
YJM1463	0.91733	0.58027	0.00055
YJM1477	0.07033	0.01386	0.00164
YJM1478	0.17307	0.15487	0.00575
YJM1479	0	0.00108	0.01566
YJM1526	0.48152	0.44781	0.03155
YJM1527	0.45682	0.42977	0.02647
YJM1549	1.12504	1.12694	0.18045
YJM1573	0.15182	0.11844	0.01171
YJM1574	1.00794	0.99833	0.34289
YJM1592	0.11866	0.14988	0.02894
YJM1628	0.68191	0.57918	0.0678
YJM1846		0
YJM1847	0.00021	0	0
YJM1869	0.36837	0.18425	0.00386
YJM1870	0.12388	0.00118	0

## Sheet: drugs
strain	amphotericin B 15mM	cycloheximide 0.25mM	cycloheximide 0.5mM	ketoconazole 10mM	ketoconazole 20mM	natamycin 3mM
S288c	0.31243	0.70274	0.42641	0.68815	0.61196	0.77621
SK1	0.53433	0.73468	0.49667	0.61811	0.52854	0.84095
RM11	0.81975	0.79212	0.57858	0.94541	0.49592	0.84623
Sigma1278b	0.90516	0.64428	0.53286	0.95186	0.72892	1
YPS163	0.93768	0.7556	0.59923	0.80912	0.59099	0.90293
YJM789	0.81094	0.16929	0.20242	0.20031	0.46888	0.87806
M22	1	0.94782	0.56873	0.94793	0.70865	0.94061
YJM189	0.32633	0.47867	0.39352	0.49259	0.47116	0.12627
YJM193	0.77527	0.5222	0.43336	0.82417	0.59994	0.73075
YJM195	0.80718	0.58101	0.38799	0.78817	0.5733	1
YJM244	0.26234	0.62757	0.40344	0.91672	0.64057	0.35264
YJM248	0.45606	0.73037	0.51914	0.97352	0.68324	1
YJM270	0.88084	0.66807	0.60091	0.95019	0.86207	0.75831
YJM271	0.43592	0.14836	0.15671	0.80563	0.49916	0.38214
YJM320	0.72079	0.33845	0.38426	0.46831	0.59326	1
YJM326	0.91337	0.9491	0.84328	0.97563	0.92678	0.88454
YJM428	0.9022	0.18778	0.33326	0.39399	0.53544	0.84474
YJM450	0.5036	0.16912	0.2664	0.12344	0.39951	0.73705
YJM451	0.91447	0.69588	0.49225	0.80235	0.72044	0.94092
YJM453	0.87492	0.78844	0.62003	0.91523	0.74597	1
YJM456	0.92803	0.7493	0.58704	0.79365	0.57472	0.91506
YJM470	0.73206	0.76597	0.6498	0.84119	0.6722	0.99427
YJM541	0.90462	0.09354	0.28772	0.50726	0.49857	0.9902
YJM554	0.81594	0.18549	0.22586	0.6686	0.54131	0.94424
YJM555	0.96317	0.79352	0.60238	0.90121	0.87529	0.98556
YJM627	0.74383	0.80566	0.56447	0.85404	0.7058	0.95478
YJM681	0.93197	0.42843	0.4241	0.39868	0.50027	0.9659
YJM682	0.67635	0.83077	0.60611	0.8298	0.53728	0.99708
YJM683	0.82183	0.19354	0.26137	0.49844	0.51159	0.8726
YJM689	0.55976	0.50536	0.44199	0.32785	0.55082	0.96995
YJM693	0.69017	0.72541	0.51063	0.82707	0.64112	0.20711
YJM969	0.46943	0.81437	0.56505	0.88002	0.52093	0.48064
YJM972	0.45491	0.79632	0.52808	0.86334	0.67654	0.19375
YJM975	0.38367	0.75347	0.47549	0.90716	0.55227	0.37177
YJM978	0.4251	0.7365	0.50079	0.9171	0.65394	0.35962
YJM981	0.4922	0.85112	0.52922	0.75747	0.53761	0.07307
YJM984	0.51758	0.80362	0.56816	0.89666	0.6981	0.40879
YJM987	0.64474	0.84263	0.61999	0.88236	0.67423	0.39636
YJM990	0.38758	0.73845	0.44938	0.87401	0.49753	0.39753
YJM993	0.6399	0.78844	0.59117	0.88826	0.64291	0.76913
YJM996	0.58959	0.79933	0.52158	0.91943	0.62029	0.40908
YJM1078	0.99312	0.69474	0.50025	0.74747	0.57418	0.97092
YJM1083	0.0147	0.22193	0.17214	0.19022	0.48626	0.07701
YJM1129	0.71926	0.70903	0.50478	0.94612	0.75279	0.96723
YJM1133	0.99796	0.14462	0.30377	0.53489	0.56206	0.95293
YJM1190	0.92469	0.26164	0.27236	0.58943	0.50544	0.97754
YJM1199	0.74061	0.0477	0.0415	0.03631	0.36456	0.96302
YJM1202	0.90423	0.546	0.44765	0.67848	0.55831	0.99181
YJM1208	0.18933	0.7182	0.5904	0.73375	0.69041	0.70549
YJM1242	0.21035	0.72874	0.56741	0.91558	0.87024	0.30854
YJM1244	0.40441	0.6096	0.4938	0.86967	0.5841	0.83323
YJM1248	0.4752	0.65694	0.49327	0.93832	0.79682	0.65215
YJM1252	0.92014	0.81659	0.55922	0.91206	0.82609	0.99402
YJM1273	0.90798	0.74691	0.57889	0.80126	0.60009	0.90662
YJM1304	0.80204	0.46682	0.36087	0.22934	0.40011	0.63697
YJM1307	0.44392	0.47364	0.40958	0.54964	0.51895	0.54149
YJM1311	0.6151	0.84951	0.5386	0.85118	0.59665	0.44216
YJM1326	0.9169	0.0434	0.25178	0.53998	0.41023	0.96801
YJM1332	0.77653	0.68464	0.50311	0.86316	0.6414	0.77557
YJM1336	0.47927	0.73362	0.54818	0.88489	0.64941	0.9462
YJM1338	0.85886	0.71919	0.59573	0.90655	0.73489	0.57015
YJM1341	0.45988	0.82786	0.54563	0.76381	0.73938	0.11992
YJM1342	0.86379	0.74089	0.64238	0.8936	0.681	0.92437
YJM1355	0.32138	0.19526	0.25279	0.16218	0.35555	0.85
YJM1356	0.43044	1	0.49124	0.62499	0.7284	0.54788
YJM1381	0.75038	0.48098	0.48748	0.76858	0.7294	0.79367
YJM1383	0.37184	0.64818	0.40801	0.48067	0.46138	0.255
YJM1385	0.45695	0.50696	0.4317	0.59872	0.53369	0.88464
YJM1386	0.5458	0.70036	0.48091	0.73997	0.61636	0.4258
YJM1387	0.21221	0.42159	0.18963	0.21638	0.44865	0.17487
YJM1389	0.857	0.61153	0.5042	0.67392	0.59387	0.99458
YJM1399	0.80137	0.52826	0.47943	0.6944	0.55927	0.90615
YJM1400	0.86742	0.73413	0.49993	0.88389	0.73335	0.7963
YJM1401	0.65317	0.57818	0.46603	0.73636	0.54744	0.86124
YJM1402	0.9262	0.73121	0.57514	0.76538	0.55208	0.88338
YJM1415	0.24979	0.6069	0.44063	0.89523	0.70393	1
YJM1417	0.69515	0.82212	0.52662	0.92115	0.69697	0.95522
YJM1418	0.8713	0.62867	0.49397	0.77828	0.58485	0.88817
YJM1434	0.89599	0.75282	0.57184	0.77771	0.55814	0.89147
YJM1439	0.086	0.48331	0.32805	1	0.73917	0.00676
YJM1443	0.91333	0.69939	0.55803	0.89696	0.73832	0.66181
YJM1444	0.18097	0.18507	0.43522	0.41712	0.4814	0.00195
YJM1447	0.82813	0.66198	0.43835	0.85056	0.64186	0.61044
YJM1450	0.60371	0.80463	0.59924	0.71572	0.49458	0.90915
YJM1460	0.86379	0.61378	0.48005	0.5607	0.49797	0.95144
YJM1463	0.4814	0.74579	0.51857	0.92017	0.46311	1
YJM1477	0.70176	0.80821	0.57706	0.98168	0.82675	0.96892
YJM1478	0.46449	0.73271	0.46409	0.74166	0.48356	0.8813
YJM1479	0.49022	0.35691	0.4327	0.91434	0.73688	0.24811
YJM1526	0.52902	0.71629	0.4175	0.83667	0.52443	0.91236
YJM1527	0.88777	0.69713	0.46919	0.8314	0.46842	0.37937
YJM1549	0.70103	0.57955	0.48761	0.79316	0.6029	0.5574
YJM1573	0.91705	0.73218	0.53439	0.79065	0.52342	0.86591
YJM1574	0.65968	0.86516	0.66817	0.93118	0.76806	0.58281
YJM1592	0.88053	0.63951	0.45723	0.61152	0.55757	0.99346
YJM1628	0.55426	0.60739	0.50189	0.50047	0.48754	0.67175
YJM1846	0.59658	0.63888	0.47732	0.29064	0.5441	0.53751
YJM1847	0.55941	0.37667	0.28392	0.41886	0.63947	0.55668
YJM1869	0.44083	0.59976	0.48679	0.72735	0.68136	0.97227
YJM1870	0.46922	0.91594	0.6105	0.91784	0.66967	0.95871

## Sheet: flocculation
Table S13. 46 phenotypes measured in the 100 genomes strains (see Methods for descriptions of how phenotypes were acquired).
strain	flocculation
S288c	4.80094
SK1	2.27273
RM11	5.31674
Sigma1278b	4.64037
YPS163	6.57895
YJM789	2.04819
M22	4.47942
YJM189	14.0288
YJM193	2.18978
YJM195	0
YJM244	1.6
YJM248	4.10959
YJM270	2.57235
YJM271	2.69231
YJM320	4.88827
YJM326	1.9802
YJM428	9.85915
YJM450	7.21271
YJM451	6.95755
YJM453	8.27586
YJM456	8.37264
YJM470	13.1395
YJM541	2.05656
YJM554	0.5102
YJM555	1.2285
YJM627	0.25126
YJM681	1.71149
YJM682	4.80769
YJM683	3.7594
YJM689	2.44216
YJM693	5.52885
YJM969	0.85366
YJM972	0.37879
YJM975	0
YJM978	1.2285
YJM981	0.25381
YJM984	4.6729
YJM987	0.35211
YJM990	2.22222
YJM993	2.14286
YJM996	1.89573
YJM1078	2.77778
YJM1083	3.05851
YJM1129	3.41463
YJM1133	4.77941
YJM1190	6.30372
YJM1199	2.38693
YJM1202	0.98522
YJM1208	0.23923
YJM1242	1.52355
YJM1244	1.19048
YJM1248	1.67095
YJM1252	16.2291
YJM1273	9.68421
YJM1304	1.3986
YJM1307	2.46114
YJM1311	4.80094
YJM1326	5.16827
YJM1332	8.29384
YJM1336	7.25995
YJM1338	4.18848
YJM1341	7.74818
YJM1342	2.57353
YJM1355	2.0936
YJM1356	6.64894
YJM1381	2.35149
YJM1383	5.01222
YJM1385	2.55754
YJM1386	1.42857
YJM1387	3.75
YJM1389	0
YJM1399	4.86936
YJM1400	10.1415
YJM1401	5.35211
YJM1402	12.297
YJM1415	4.22741
YJM1417	3.57143
YJM1418	3.41981
YJM1434	7.58621
YJM1439	4.71939
YJM1443	17.096
YJM1444	10.0728
YJM1447	8.69565
YJM1450	6.00522
YJM1460	5.35714
YJM1463	4.51306
YJM1477	4.24658
YJM1478	2.10918
YJM1479	0
YJM1526	3.21337
YJM1527	2.41477
YJM1549	5.94595
YJM1573	3.02326
YJM1574	2.68293
YJM1592
YJM1628
YJM1846	1.18483
YJM1847
YJM1869
YJM1870	6.29291

## Sheet: sporulation
strain	%4-spored, KAc plates 25C.txt	%4-spored, KAc plates 30C.txt	%4-spored, diet KAc plates 25C.txt	%4-spored, diet KAc plates 30C.txt	%4-spored, liquid KAc25C.txt	%4-spored, liquid KAc30C.txt	%sporulation, KAc plates 25C.txt	%sporulation, KAc plates 30C.txt	%sporulation, diet KAc plates 25C.txt	%sporulation, diet KAc plates 30C.txt	%sporulation, liquid KAc25C.txt	%sporulation, liquid KAc30C.txt
S288c	23.4	40.6	20.1	0	26.2	14.9	38.3	45.9	34.5	11.8	46.8	32.6
SK1	43.3	42.7	47.2	28.9	26.4	29.7	91.7	96	98.7	98.3	44.8	76.7
RM11	20	27.3	10.7	12	45.5	34.3	92	84.7	83.3	86	70.6	44.7
Sigma1278b	29.4	30.6	23.4	0	7.5	0	58.5	69.4	89	30.4	16.2	1
YPS163	69.7	69.3	26.7	38.3	60.5	55.8	98.7	97.3	92.7	97.7	88	66.8
YJM789	39.7	6.8	0	27.2	10.7	15.9	87.3	45.2	17.4	70.4	65.6	36.2
M22	0.7	0.7	6	21.7	30.7	9.2	93	93	80.3	83.3	58.7	35.6
YJM189			23.9		10	0.9			45.2		25	2
YJM193	11.3	4.7	12	0.7	27.7	0.9	37.3	12.3	51	9	68.5	18
YJM195	41.3	50.7	29	20.7	7.7	7.3	56	88.1	80.9	82.3	71.9	13.9
YJM244	8.7	8	14	4.3	6.3	3.5	92.3	90.7	91.3	87.3	55.3	50.3
YJM248	9	0	20.3	8	0	22.6	11.3	0	33.3	26	0	38.2
YJM270	50	63.7	8	4.3	9.2	12.9	96	95	86.7	80.7	70.5	62.7
YJM271	91.3	53.3	43.3	49	32.6	23	94.7	87.3	92.7	79	57.1	23.8
YJM320	2.7	3.7	4.3	10	2.4	72.2	10.7	53.7	14.3	38.7	14.5	85.1
YJM326	25.7	54	32.7	28.7	30.5	23.3	59.7	94.3	70	82.3	35.7	41.9
YJM428	0	0	0	0	6.7	4.3	0	0	0	0	16.4	5
YJM450	5.7	26	6	7.3	17	0	66.3	87	81	73.3	36	0
YJM451	0.3	0	3.7	4.3	3.3	3.7	7.3	8.3	9.7	15.3	12.9	52.2
YJM453	0	0	14	7.3	10.3	1.7	0	0	46	47.3	27.2	15.8
YJM456					36	26.2					80.5	85.7
YJM470	2	9.6	1	3	2.3	0.7	36.7	55.6	45	46	3.3	1.3
YJM541	0.7	6.7	18	21.3	35.9	9.6	17.3	81.7	32	44.3	39.9	20.8
YJM554	0	15.3	5.7	7.7	23.7	19.4	0	54	16.3	61.7	33	24.3
YJM555					4.7	33					8.3	53.3
YJM627	36	50.7	27	29.3	32.4	25.6	79	91.7	84.7	90.3	55.5	71.1
YJM681	5.9	8.6	1	0	34.9	11.7	40.3	84.4	51	61	42.9	16.3
YJM682	15.7	24.7	0.7	0.7	19.2	15.3	85	96.3	79	92.3	55.6	69
YJM683	0.7	10	4.7	15	45.5	8.9	15	80	43	81.7	70.1	57
YJM689	31	46.3	30.3	36.3	2.3	14.4	40.7	75.7	44.7	65.7	30.9	29.8
YJM693	0	84.7	24	58	7.7	37.4	0	91.3	29	72	22.3	67.4
YJM969	15	12	9.7	12	12.7	0.9	38.3	25	45	38.7	19.3	28.3
YJM972	17.3	8	25.3	29.7	32	18.9	60.7	36.3	45	56.7	40.4	25.2
YJM975	20.3	8	10	11.4	30.9	25.8	72.3	38.2	68.8	41.2	47.8	26.2
YJM978	42.5	22.9	21.2	8	27.7	8	79.1	34.6	83.1	61.9	36	34.6
YJM981	22.3	0	29	18.3	11	9.8	51	0	62	42.3	16	11.7
YJM984	14	27.3	13.3	16	33.1	9	40	36.3	27.3	52.7	36.4	33.9
YJM987	13	5	12	11	21.6	15.2	31.3	15.3	44	37.7	27.2	49
YJM990	23.3	13.3	10.3	9.3	42.7	28.7	60.7	69.3	56	54.7	53.3	54.4
YJM993	16.7	18.2	3.3	1.7	33.2	16.4	68.9	54.3	57.9	60.3	46.1	33.8
YJM996	25.9	8.6	10.2	43.3	24.1	13.4	67.1	40.9	67	69	41.1	32.3
YJM1078	3.7	0	12	3.3	6	43.5	57.3	0	38	25	15	53.7
YJM1083	0	4.7	6	13.7	22.9	5.3	0	30.7	25.3	42	31.9	10.3
YJM1129	24.7	6.3	5.3	6	39.9	16.1	92.7	46	68	76	62.5	48.3
YJM1133	18	12	18	18.7	20.5	8.7	24	19.7	29.3	41	20.5	10.7
YJM1190	23	24.7	26.7	33.3	24.1	10.3	72	86.7	52.7	71.3	37.6	21.9
YJM1199	0	0	0	0	13.2	16.8	0	0	0	0	56.8	62.9
YJM1202	19	8.7	12	4	32	24.2	81.3	90.7	57.3	66.3	48	45.2
YJM1208	0	0.7	0	0.3	22.6	16.9	2.6	44.7	6.3	25.5	29.3	19.3
YJM1242	0.7	0	0	0	42.6	30.9	0.7	0	27.8	29.1	60.6	39.5
YJM1244	0	0	9.9	0	60.7	18.3	0	0	45.5	0	85.6	26.7
YJM1248	0	0	0	0	24.3	14.6	0	0	0	0	36.9	23.1
YJM1252					20.9	9.5					49.3	27.6
YJM1273	74	60.3	18	30.7	64.2	67.8	98.3	99.3	97.3	93.7	89.4	80.9
YJM1304	7	6.7	7	6.7	22	21.2	18.3	66.7	43	60.3	38.3	42.4
YJM1307	11.3	10	8.3	10.7	11.9	0	89.7	86	67	66.3	29.3	0
YJM1311	0	0	0	0.7	18.6	11.3	10.3	8	13.7	16.7	59.5	17.7
YJM1326	2	0.7	13.6	6.7	24.4	29.2	40	78	33.3	49.3	53.5	51.2
YJM1332	0.7	4	3.3	6.7	12	25.6	21	34.7	42.7	36	38.5	49.2
YJM1336	20.3	18.3	9.7	17	10.3	13.9	72.3	75	61.7	82	28.3	18.9
YJM1338	32	38	30.7	18.7	51	49.7	95.7	97.3	98	88	92	82.5
YJM1341	42.3	68	56.6	30	24.7	19.7	81.7	95	81.3	64	25.1	24.3
YJM1342	48.7	48.3	38	43.3	46.7	38	98	98	98	97	57	50.2
YJM1355	7	18	34	13	34.4	42	24	87	78	74.7	67.2	63.7
YJM1356	14.5	14	12.3	7	0	17.9	50.3	32.2	60.1	46.5	0	37.4
YJM1381	55.3	33.7	30	12	16.2	16.3	68.7	85.7	84	91	17.5	16.3
YJM1383	42.5	23	29.6	27.7	33.1	29.4	66.1	60.3	61.5	66	49	41.3
YJM1385	43.3	45.7	35	46.7	13	10.6	49.3	54.3	76	88	16.3	13.6
YJM1386	23.3	17.3	20.3	17	30.5	7.8	58	81	60.7	56	47	16.2
YJM1387	7.3	5.3	0.7	0	12	8.6	49.2	44.7	35.8	19.5	24.6	12.6
YJM1389	15.8	12.3	12.5	14.6	27.3	25.4	21.4	31.6	51.6	40	49.6	38.6
YJM1399	85.3	88	75.3	74.7	71.1	58.8	95.7	98.3	90	87.3	81.1	71.1
YJM1400	35.7	38	16.3	32	32	23.6	97	96.3	95	97	52.3	42.9
YJM1401	0	9.9	0.7	33.2	22.9	24.8	0	34.1	3.6	37.3	33.3	36
YJM1402	80	75.3	46.7	36.7	64.3	69.2	97.3	98.3	98.7	99	83.7	86.4
YJM1415	29.3	26.7	25	28	30.5	20.9	99.3	92.7	96.7	97	42.6	27.1
YJM1417	19.7	18.7	23.3	19.3	30	36.5	47.3	37.3	54.6	57.3	61.7	62.8
YJM1418	67	65	59.3	67	44.1	52	97.3	98.3	97.7	98.3	64.6	73.8
YJM1434	70	69.7	46.7	18	62.5	73.6	98.7	99	97.3	94	84.4	84.8
YJM1439	33.3	21.2	0	52	0	0	41.9	30	0	91.7	0	0
YJM1443	55.3	61.7	45.3	46.7	63.7	60.8	98.7	97.7	97.3	94.7	89.3	79.1
YJM1444	56.7	57.3	33	26.3	63.5	42.3	98.3	99.3	91	93.7	84.7	57
YJM1447	44	44	45.3	39	22.4	33.2	98.7	98.7	96.7	95.7	31	44.2
YJM1450	6.4	11.3	3.6	14.8	17.8	11.8	6.8	25.3	16.1	25.2	20.1	16.4
YJM1460	0	0	0.3	0	14.6	16	0	0	4.7	6.7	24.3	27
YJM1463	0	5	5.3	1	5.1	0	4.63	19.1	37.3	33	8.3	1
YJM1477	0	0	0.7	0	7.6	0	0	1	16.9	29	9.6	0
YJM1478	57	50.3	23.2	18.6	0.7	6.3	97.7	89.7	85.1	83.7	4	8.7
YJM1479	56.2	62.6	76	19.1	27.7	24.1	96.7	97.7	92	86.4	61.3	46.9
YJM1526	2.7	0	15	14.7	38.8	52.7	36.7	51	75	75	69.6	67.7
YJM1527	58.3	58.7	44	45.3	43.2	48.3	98.3	98.3	97.3	98.7	81.7	80.7
YJM1549	0	0	0	0	9	8.5	38.3	38.3	48	53.3	36.3	39.3
YJM1573	72	72	43.3	44.3	59.3	64.3	98	98	97.3	97.7	78.8	80.7
YJM1574	25.2	0.3	27	35.4	21.8	26.4	87.1	9.7	93.7	95.3	51.8	47.2
YJM1592	11.9	30.4	16	14.7	25.1	20.5	17.2	52	47	49	38.3	37.7
YJM1628	0	0	0.7	0.3	10.3	7.3	8.7	8.7	18	7.3	23.3	24.3
YJM1846	1.3	1	0	0	8.2	19.9	7	1.3	0	0	26.1	43.9
YJM1847	19.3	19.5	4.2	0.4	0	0.7	38	39.7	32	33.9	2	1.7
YJM1869	7.9	16.3	3.3	4.7	0	0	35.6	39.1	37.1	32.6	0	0
YJM1870	20	22	7.3	5.3	23.6	29.5	98.7	96.7	85.7	84.7	38.5	75.9

## Sheet: sulfite
strain	3mM	6mM	9mM
S288c	0.91337	0.00213	0.08109
SK1	1.01284	0.7353	0.10495
RM11	0.9146	0.0054	0.00717
Sigma1278b	0.99696	0.00043	0.01843
YPS163	0.98647	0.11832	0.00298
YJM789	0.98954	0	0.00015
M22	0.96976	0.93669	0.37273
YJM189	1.1796	1.46555	1.23594
YJM193	0.88079	0.00099	0.07357
YJM195	0.8673	0	0.00359
YJM244	0.90835	0.00025	0.02228
YJM248	1.0006	0	0.00296
YJM270	1.06355	1.2221	1.01324
YJM271	0.7115	0	0.00137
YJM320	0.94904	0.00188	0.00499
YJM326	0.87611	0	0.01036
YJM428	0.84158	0.00026	0.01999
YJM450	1.01231	0	0.00093
YJM451	1.04815	0.83904	0.08234
YJM453	0.90693	0.00072	0.02666
YJM456	0.95327	0.00146	0.04444
YJM470	0.93577	0.10187	0.08438
YJM541	0.96327	0.11612	0.00716
YJM554	0.91669	0.00091	0.0175
YJM555	0.89866	0.00943	0.1221
YJM627	0.93098	0.01814	0.04917
YJM681	0.91535	0.0008	0.00321
YJM682	0.87161	0	0.00673
YJM683	0.87674	0.00023	0.05817
YJM689	0.91728	0	0.00064
YJM693	0.95215	0.00152	0.07278
YJM969	1.04862	1.12786	0.85502
YJM972	1.04344	1.1048	0.88578
YJM975	0.83298	0.00132	0.02999
YJM978	1.04447	0.93953	0.59357
YJM981	1.0853	1.11052	0.80283
YJM984	0.96613	0.00138	0.03609
YJM987	1.02833	1.05203	0.78995
YJM990	0.89112	0.01629	0.10315
YJM993	0.96846	0	0.01124
YJM996	1.02891	1.02347	0.75421
YJM1078	0.96857	0.00267	0.04671
YJM1083	1.17296	0.0214	0
YJM1129	1.05089	1.13234	0.88373
YJM1133	0.95393	0.00489	0.07944
YJM1190	0.98576	0.00148	0.02426
YJM1199	0.54055	0	0.00033
YJM1202	0.8205	0	0.00091
YJM1208	0.90208	0.00013	0.0095
YJM1242	0.94534	0	0.0009
YJM1244	0.84045	0.00467	0.05966
YJM1248	0.94974	0.00013	0.00922
YJM1252	0.91328	0	0.02495
YJM1273	0.9536	0.35894	0.04655
YJM1304	0.91056	0.00123	0.05702
YJM1307	0.85589	0.00958	0.0664
YJM1311	1.04136	0.27806	0.06566
YJM1326	0.90562	0	0.02136
YJM1332	1.00903	0.00378	0.00545
YJM1336	0.82614	0.00023	0.01648
YJM1338	0.93457	0.01099	0.01683
YJM1341	0.91218	0	0.0007
YJM1342	0.93785	0.02016	0.02632
YJM1355	0.89027	0	0.00082
YJM1356	0.93686	0	0.00014
YJM1381	0.9068	0.00035	0.00141
YJM1383	1.25063	0.01089	0.10796
YJM1385	0.91911	0	0.00126
YJM1386	0.89251	0.00027	0.0012
YJM1387	0.80642	0	0
YJM1389	0.87432	0	0.00464
YJM1399	1.00608	0.37756	0.0667
YJM1400	0.89913	0.00933	0.05492
YJM1401	0.9238	0.00073	0.00374
YJM1402	0.9711	0.19596	0.02494
YJM1415	0.86014	0.00025	0.0214
YJM1417	0.98268	0.00176	0.04958
YJM1418	0.97822	0.37715	0.04096
YJM1434	0.95338	0.121	0.01369
YJM1439	1.08098	0	0.00142
YJM1443	1.0021	0.71015	0.03079
YJM1444	0.87096	0.01733	0.00066
YJM1447	0.97822	0.00303	0.0206
YJM1450	1.00221	0	0.00028
YJM1460	0.96791	0	0.00116
YJM1463	0.87449	0.00395	0.13024
YJM1477	0.9487	0.00038	0.01346
YJM1478	0.87293	0.0021	0.01774
YJM1479	0.94937	0.00044	0.03752
YJM1526	1.00109	0.95584	0.6201
YJM1527	1.05746	0.22622	0.10788
YJM1549	1.05135	1.26255	0.97249
YJM1573	0.9947	0.27707	0.01304
YJM1574	1.08613	0.49162	0.13428
YJM1592	0.85252	0.0046	0.01732
YJM1628	0.98142	0.00058	0.00106
YJM1846	0.25062	0	0.00273
YJM1847	0.30968	0	0.02926
YJM1869	1.08801	0.00027	0.00689
YJM1870	0.94159	0.00087	0.00998

## Sheet: temperature
strain	sd 15C	sd 37C	sd 39C	seg 15C	seg 37C	seg 39C	ypd 15C	ypd 37C	ypd 39C	ypeg 15C	ypeg 37C	ypeg 39C
S288c	0.64959	0.50951	0.73283	0.51067	0.70004	0.20604	0.35115	0.97457	0.34089	0.38776	0.93626	0.15273
SK1	1	0.68796	0.96091	0.73178	0.90939	0.53701	0.47517	0.92646	0.13893	0.67424	1	0.3967
RM11	0.72168	0.8643	0.88571	0.57776	0.88301	0.75302	0.63918	1	0.91669	0.61268	0.86806	0.49774
Sigma1278b	0.89017	0.76558	0.62999	0.83474	0.75181	0.5344	0.18168	0.6813	0.28563	0.61243	0.99371	0.41467
YPS163	0.76653	1	0.96701	0.69715	1	1	0.67245	1	0.98331	0.65164	1	0.8574
YJM789	0.72559	1	0.96361	0.69625	0.91247	0.47339	0.55616	0.96439	0.92105	0.55286	0.89365	0.30223
M22	0.73701	0.97056	0.86627	0.42865	1	0.50861	0.61311	0.87852	0.8615	0.56202	0.88547	0.62294
YJM189	0.80843	1	0.97049	0.80092	0.99709	0.49866	0.42745	0.98449	0.70004	0.60321	0.77801	0.51592
YJM193	0.73954	0.84638	0.85896	0.42596	0.89942	0.39132	0.57636	0.90101	0.85636	0.50762	0.92899	0.31285
YJM195	0.86375	1	0.97026	0.20978	0.41813	0.26631	0.46825	0.95803	0.792	0.38866	0.7943	0.18633
YJM244	1	1	1	0.73026	0.49678	0.24262	0.69829	1	0.51157	0.65307	0.94503	0.47458
YJM248	1	1	1	1	0.73063	0.00186	0.6361	1	0.82153	0.76672	0.91571	0.46706
YJM270	0.98535	1	0.45615	0.67277	0.76104	0.24365	0.6177	0.20432	0.00113	0.72263	1	0.33689
YJM271	0.86471	0.74316	0.76833	0.62622	0.58478	0.06278	0.59613	0.83888	0.04915	0.45235	0.89992	0.16412
YJM320	0.80478	1	0.99027	1	0.97543	0.9981	0.56759	1	0.63009	0.58011	1	0.8072
YJM326	0.7756	1	0.88594	0.6903	0.97493	0.12693	0.59981	0.98547	0.85819	0.32723	0.89839	0.46718
YJM428	0.8052	1	1	0.66458	0.30198	0.25627	0.59545	1	0.62069	0.57758	0.97407	0.20574
YJM450	0.73029	1	0.94662	0.03573	0.94294	0.36137	0.40057	1	0.90726	0.26877	1	0.71483
YJM451	0.78039	1	1	0.37753	0.91903	0.92577	0.38596	1	1	0.57033	0.98094	1
YJM453	0.78011	0.56708	0.5142	0.33396	0.33012	0.72258	0.63826	0.96769	0.70222	0.57585	0.97858	0.60494
YJM456	0.73534	0.81577	0.65767	0.57429	0.42925	0.94995	0.6011	1	0.87889	0.58246	1	0.8672
YJM470	0.57349	1	1	0.30272	0.46712	0.94973	0.1992	1	0.95641	0.13432	0.85203	0.58018
YJM541	0.77112	0.82441	0.98678	1	1	0.62162	0.54848	0.91908	0.75571	0.59723	0.9603	0.68166
YJM554	0.8225	0.872	0.88416	0.8095	0.99271	0.13638	0.61203	0.90158	0.82319	0.50023	0.98991	0.62167
YJM555	0.87399	0.74157	0.91623	1	1	1	0.69891	1	0.96103	1	1	0.96782
YJM627	0.85832	0.85796	0.45654	0.5776	0.77141	0.39702	0.42894	1	0.77297	0.32442	0.93963	0.28415
YJM681	0.77701	1	0.96803	0.97107	1	1	0.63052	1	0.95748	0.76438	1	0.70739
YJM682	0.72885	1	0.92137	0.77448	0.71151	0.58678	0.64187	0.99131	0.90808	0.48369	0.99623	0.34239
YJM683	0.66354	1	0.95537	1	0.84734	0.72811	0.40491	1	0.95951	0.51689	0.87716	0.50783
YJM689	0.9847	1	0.99082	1	0.75842	0.84361	0.57708	1	0.89727	0.66887	1	0.62693
YJM693	0.83233	0.94216	0.83475	0.52686	0.31734	0.32072	0.61331	1	0.35852	0.4142	0.82335	0.13976
YJM969	0.77562	0.86869	0.68413	0.66046	1	0.36169	0.69106	0.82781	0.37301	0.53895	0.82543	0.4239
YJM972	0.79985	0.71842	0.58246	0.50742	0.40039	0.07106	0.65048	0.52491	0.10245	0.53565	0.14977	0.07
YJM975	0.78857	0.81062	0.90934	0.87915	1	0.55865	0.6178	0.9787	0.94099	0.5161	0.62496	0.37655
YJM978	0.79232	0.64841	0.40914	0.79503	1	0.17413	0.56652	1	0.65669	0.58896	1	0.22407
YJM981	0.8461	0.62309	0.68293	0.95679	1	0.35765	0.63643	0.95921	0.12629	0.66862	1	0.4455
YJM984	0.81791	0.63582	0.42533	0.61449	0.3709	0.32811	0.65493	1	0.80268	0.59065	1	0.24802
YJM987	0.76272	0.4729	0.46956	0.48352	0.32415	0.39733	0.6234	0.64178	0.1399	0.58465	0.19383	0.12173
YJM990	0.75327	1	0.81706	0.7858	1	0.79708	0.62143	0.91074	0.24097	0.53202	0.76855	0.35785
YJM993	0.75432	1	0.70494	0.5976	0.59204	0.54887	0.61242	0.99407	0.83516	0.53939	1	0.3928
YJM996	0.73879	0.94182	0.8119	0.81324	1	0.76037	0.68066	0.83232	0.52645	0.67202	0.83841	0.57667
YJM1078	0.83729	0.88282	0.63002	0.85961	0.55175	0.83448	0.69164	1	0.8738	0.69035	0.98037	0.49984
YJM1083	1	0.73449	1	0.42719	0.71828	0.21271	0.12686	0.94705	0.34279	0.64439	0.77824	0.3803
YJM1129	0.82012	1	0.88403	0.80129	0.99707	0.8533	0.69577	1	0.44699	0.5339	0.81511	0.37852
YJM1133	0.78028	0.81465	0.82795	0.57185	0.41935	0.61994	0.56796	1	0.83489	0.53044	0.87284	0.30416
YJM1190	0.78144	0.92482	0.85848	0.82259	0.6936	0.78395	0.55042	0.92533	0.84214	0.77296	1	0.63543
YJM1199	0.74762	0.7545	0.88275	1	0.85422	1	0.2649	1	0.53174	0.56938	0.58342	0.38971
YJM1202	1	1	1	0.74151	1	0.61468	0.4987	1	0.816	0.50205	0.93742	0.54904
YJM1208	1	0.3252	0.6717	0.28743	0.35721	0.08327	0.44664	1	0.26239	0.52516	1	0.05442
YJM1242	0.84779	0.75961	0.50744	1	0.04237	0.25275	0.59668	1	1	0.21234	0.53451	0.36376
YJM1244	0.86517	0.52459	0.64383	1	1	0.84016	0.70799	1	0.85987	0.5135	0.84696	0.24785
YJM1248	0.94989	0.38027	0.24646	0.56152	0.9286	0.15009	0.39608	0.94406	0.70156	0.36907	0.87999	0.13048
YJM1252	1	1	1	1	0.90835	1	0.69622	1	1	0.76742	1	0.61227
YJM1273	0.71519	1	1	0.69245	1	1	0.5753	1	1	0.65161	1	0.87618
YJM1304	0.79579	1	0.99702	0.73378	0.9631	0.385	0.54626	1	0.87065	0.57584	0.98545	0.42407
YJM1307	0.80298	1	1	0.97039	1	0.89658	0.53541	1	0.43012	0.56558	1	0.43383
YJM1311	0.85339	0.95412	1	0.80897	1	0.81001	0.68726	1	1	0.75265	1	0.76995
YJM1326	0.77067	0.95921	0.46241	0.69258	0.99807	0.424	0.62218	0.85416	0.6312	0.58513	0.39254	0.27223
YJM1332	0.72802	0.80206	0.57414	0.52542	0.74643	0.59835	0.68213	1	0.10883	0.61249	0.97027	0.70908
YJM1336	0.7942	0.60658	0.63003	0.21338	0.54058	0.23888	0.55172	0.91029	0.77492	0.41035	0.96749	0.42432
YJM1338	0.68148	1	0.72536	0.43961	0.82501	1	0.5485	1	0.88188	0.61854	1	0.69794
YJM1341	0.78442	0.91798	0.79523	0.54056	0.59536	0.41193	0.41896	0.87942	0.17675	0.36678	0.87243	0.13673
YJM1342	0.73	1	0.9456	0.71166	1	0.00191	0.45803	0.88883	0.78321	0.6091	0.9758	0.2381
YJM1355	1	0.8758	0.68046	1	1	1	0.6145	0.07503	0.04601	0.4977	0.5183	0.23468
YJM1356	0.892	0.49396	0.68436	0.68338	1	0.03529	0.32734	1	0.24094	0.482	1	0.33219
YJM1381	0.87214	1	0.89247	0.88022	1	0.73945	0.52411	0.90687	0.67423	0.36591	0.79927	0.28668
YJM1383	0.75435	0.96878	0.66125	0.98875	0.6294	0.88871	0.65742	0.16898	0.05176	0.4116	0.22271	0.51535
YJM1385	0.83546	1	0.90945	0.58418	0.6923	0.66025	0.64336	1	0.82792	0.52435	1	0.51531
YJM1386	0.77489	0.93233	0.86761	0.71426	0.99884	0.54798	0.56832	1	0.82305	0.43735	0.88567	0.4325
YJM1387	0.6596	0.68627	0.79295	1	1	1	0.35766	1	0.47274	0.53465	0.97689	0.46348
YJM1389	0.7804	1	0.94442	0.76064	0.99331	0.95662	0.42358	1	1	0.57154	1	1
YJM1399	0.77143	0.96582	0.71386	0.65899	0.58099	0.67361	0.49412	0.93769	0.8084	0.62452	0.98759	0.13507
YJM1400	0.73317	1	0.78378	0.70629	1	0.71667	0.57305	1	0.71232	0.58924	0.9319	0.48732
YJM1401	0.76485	1	0.70114	0.83613	0.93891	0.77854	0.53869	0.98368	0.86834	0.55708	0.83286	0.45228
YJM1402	0.72169	1	1	0.68681	1	0.86024	0.47308	1	0.9232	0.55796	1	0.70604
YJM1415	1	0.97432	1	0.78734	1	0.55846	0.5152	1	0.8149	0.68764	1	0.48787
YJM1417	0.83447	0.96807	0.85636	0.52487	0.38834	0.89177	0.64956	0.9716	0.84131	0.57177	1	0.6952
YJM1418	0.73218	1	0.68279	0.51603	0.99317	0.85249	0.52437	1	0.93792	0.65719	1	0.54582
YJM1434	0.7453	1	0.95861	0.69115	1	1	0.6069	1	0.96721	0.64095	1	0.86559
YJM1439	0.78163	0.85751	0.37462	0.7172	0.1056	0.01566	0.24065	1	0.00218	0.61497	0.76212	0.11789
YJM1443	0.6826	1	0.94526	1	1	1	0.62158	1	1	0.64254	1	0.68245
YJM1444	0.68286	0.99242	0.9164	0.00182	0.67712	0.06008	0.19373	1	0.82122	0.09341	0.93555	0.12947
YJM1447	0.78166	0.87678	0.68918	0.46466	0.42144	0.3839	0.5566	0.88552	0.10347	0.44812	0.28331	0.18794
YJM1450	0.99965	1	1	0.80742	0.96505	0.65983	0.64065	1	0.81535	0.73082	0.44024	0.46636
YJM1460	0.82824	1	0.9961	0.76171	0.95629	0.8789	0.62078	1	0.94705	0.55831	0.99245	0.96738
YJM1463	0.79875	0.77077	0.85726	0.45657	0.96187	0.48192	0.43184	0.96217	0.26872	0.48666	0.91439	0.31786
YJM1477	0.79803	0.91956	0.79201	0.72206	0.96846	0.27063	0.67287	0.99837	0.85905	0.54757	0.90204	0.19122
YJM1478	0.8424	0.94883	0.81663	0.8699	0.7517	0.60725	0.61738	0.51149	0.39592	0.59587	0.46921	0.44694
YJM1479	0.74827	0.94452	0.44865	0.8169	0.73451	0.11623	0.57262	0.86435	0.60572	0.53412	0.93379	0.3846
YJM1526	0.77113	0.88925	0.90933	0.85667	0.82147	0.91048	0.6092	1	0.78327	0.54779	0.96753	0.43073
YJM1527	0.70332	0.95823	0.87264	0.56573	1	0.85846	0.5307	1	0.92762	0.61191	1	0.64157
YJM1549	0.87565	0.90496	0.95691	0.86543	0.89129	0.94173	0.56998	0.83684	0.61927	0.58844	0.89658	0.48081
YJM1573	0.71875	1	1	0.69652	1	0.90593	0.57064	1	0.99636	0.59765	1	0.86558
YJM1574	1	0.87961	0.5727	0.49755	0.23917	0.19801	0.53398	0.14081	0.00061	0.54032	0.52234	0.05293
YJM1592	0.77109	1	0.82816	0.73419	1	0.89086	0.54304	1	0.17981	0.52233	0.94528	0.96907
YJM1628	0.82202	1	0.8602	0.62432	1	0.96722	0.62398	1	0.9882	0.63639	1	1
YJM1846	1	0.5607	1	0.95143	0.51048	0.72317	0.32687	1	1	0.50996	0.90187	0.76041
YJM1847	0.74475	0.93203	0.73032	0.42464	0.68285	0.35603	0.22665	0.13926	0.01095	0.36588	1	0.15569
YJM1869	0.81681	0.61956	0.49681	0.22087	0.33005	0.36057	0.57424	0.33289	0.29034	0.70253	0.75566	0.3347
YJM1870	0.83628	0.98562	0.89828	0.76944	0.97494	0.79706	0.59159	1	0.86391	0.59362	0.91624	0.51154

## Sheet: vitamins
strain	-biotin	-inositol	-niacin	-p-aminobenzoic acid, -folic acid	-pantothenate	-pyridoxine	-riboflavin	-thiamine
S288c	0.99965	0.97885	1	0.99745	0.95785	1	1	0.91476
SK1	1	0.80494	1	0.99455	1	0.99577	0.99087	0.9835
RM11	0.7875	1	1	0.9888	0.80148	0.90939	0.97788	1
Sigma1278b	1	0.97365	0.99783	0.99095	1	1	1	0.97888
YPS163	0.884	1	1	1	0.87626	1	0.99054	1
YJM789	0.81209	0.89831	1	0.97451	0.90187	0.99953	1	0.97824
M22	1	1	0.99679	0.98633	1	0.86129	1	0.99881
YJM189	0.90936	0.99781	1	1	1	0.94409	0.90722	0.99109
YJM193	0.88702	1	1	1	0.68902	0.91924	0.98716	0.99371
YJM195	1	0.94916	1	0.98851	1	1	0.99913	1
YJM244	0.78427	0.97581	0.93092	0.95916	0.74458	1	0.96579	0.99147
YJM248	0.99042	1	0.99491	0.91055	0.77942	1	1	0.8333
YJM270	1	1	1	0.92866	1	1	0.99973	1
YJM271	0.86233	1	1	0.99351	0.52857	1	0.97791	0.95226
YJM320	0.89409	0.99516	1	0.99311	0.76894	0.86	0.96352	1
YJM326	0.91375	1	1	1	0.86184	1	0.99523	0.99941
YJM428	0.89895	1	1	1	0.94779	1	0.99798	0.9978
YJM450	0.72003	0.86536	1	0.94802	0.74592	0.94847	0.91088	0.96556
YJM451	0.833	0.95501	1	1	0.76903	1	0.992	1
YJM453	0.86295	1	1	0.99926	0.65334	0.74303	1	0.99678
YJM456	0.85595	1	1	1	0.87516	1	1	1
YJM470	1	1	1	1	1	1	1	1
YJM541	1	1	1	0.98124	1	0.95364	1	1
YJM554	0.86844	0.98517	1	0.99507	0.93555	0.7761	0.96525	1
YJM555	0.90877	1	1	1	0.93923	0.55464	1	0.99241
YJM627	0.93013	0.92408	1	1	0.88257	1	1	1
YJM681	0.82193	1	1	1	0.82939	0.99763	1	0.99332
YJM682	0.82788	0.98873	1	0.99012	0.80545	1	1	0.96145
YJM683	0.78851	1	1	1	0.8044	1	1	0.99905
YJM689	0.81811	1	1	1	0.84589	0.99416	0.99663	0.95117
YJM693	0.97985	0.98598	0.98629	0.96239	0.94491	1	0.97686	1
YJM969	0.84797	1	1	0.97867	0.78513	0.95078	1	0.95651
YJM972	0.87624	0.95083	1	0.99702	0.78734	0.68683	1	0.94505
YJM975	0.77844	0.98365	1	0.98984	0.76614	0.77511	1	0.97958
YJM978	0.83876	1	1	1	0.86885	0.7346	0.96933	0.95266
YJM981	0.91697	1	1	1	0.7467	0.49694	1	0.93306
YJM984	0.89409	0.95801	1	1	0.89218	1	0.99463	0.99968
YJM987	0.91769	1	1	1	0.94885	1	0.99878	1
YJM990	0.76732	0.99985	1	1	0.74499	0.7183	1	1
YJM993	0.86531	1	1	1	0.86302	0.74952	1	0.97506
YJM996	0.74895	0.97163	1	1	0.75245	0.9564	0.97238	0.96175
YJM1078	0.83724	1	1	0.9997	0.84972	1	0.99691	0.59112
YJM1083	1	0.7391	1	0.9441	0.9183	0.95873	0.96677	0.88099
YJM1129	0.78928	0.96972	1	1	0.85403	0.6873	0.98649	0.97242
YJM1133	0.84598	1	1	1	0.9025	0.76696	1	1
YJM1190	0.77033	1	1	1	0.87113	1	1	1
YJM1199	0.86315	1	1	1	0.92191	1	1	1
YJM1202	0.8951	0.89307	1	0.94508	0.86606	0.77083	0.91204	0.92493
YJM1208	1	1	0.9816	1	0.68469	1	0.98379	0.98891
YJM1242	0.64026	1	1	0.80014	0.70246	1	0.99545	0.80708
YJM1244	0.90157	1	0.99222	0.99423	0.89226	1	1	0.99312
YJM1248	1	0.79291	1	0.98999	1	1	1	1
YJM1252	1	1	0.9594	1	0.70221	0.85281	1	1
YJM1273	0.79066	1	1	0.99384	0.81975	0.96816	0.99108	1
YJM1304	0.81603	1	1	1	0.83562	0.76212	0.9937	0.9995
YJM1307	0.96864	0.98081	0.99984	0.96575	1	0.97107	1	1
YJM1311	0.92286	1	1	0.99524	1	1	0.97646	1
YJM1326	0.9514	1	1	0.99969	0.91951	0.78156	1	1
YJM1332	0.79752	1	1	1	0.64174	0.96323	0.96702	0.97767
YJM1336	0.84679	1	1	0.99813	0.8711	0.80067	0.95584	0.97768
YJM1338	0.92161	1	1	0.99938	0.96759	1	1	1
YJM1341	0.87937	0.9676	1	1	0.86722	0.96418	1	0.99884
YJM1342	1	1	1	1	0.94388	1	1	1
YJM1355	0.8673	1	1	0.96017	0.71798	1	1	1
YJM1356	0.86392	0.90796	1	1	0.65194	1	0.99675	0.98524
YJM1381	1	0.97176	1	0.97745	1	1	1	0.94893
YJM1383	0.7556	0.99933	1	0.96936	0.6606	1	0.98098	1
YJM1385	0.80205	0.9129	1	0.99241	0.85361	0.94541	0.92365	0.95465
YJM1386	0.86658	0.96062	1	1	0.95705	1	0.99257	1
YJM1387	0.86135	1	1	1	0.74013	1	0.99933	0.92442
YJM1389	1	1	1	0.99019	1	1	0.98358	0.96927
YJM1399	0.95755	0.99933	1	0.97998	0.83198	1	1	0.98682
YJM1400	0.79153	1	1	0.99279	0.82454	1	1	1
YJM1401	0.82906	1	1	0.9012	0.78495	0.78651	0.99927	0.95662
YJM1402	0.84459	1	1	1	0.89029	1	1	1
YJM1415	0.89057	0.99497	0.99299	1	0.90853	1	0.99174	1
YJM1417	0.8526	1	1	0.99798	0.82796	0.79528	0.99576	1
YJM1418	0.85764	1	1	1	0.88584	1	0.99945	1
YJM1434	0.85349	1	1	1	0.86899	1	1	1
YJM1439	1	0.15267	0.99052	0.94431	0.9786	1	0.98448	0.90423
YJM1443	0.77875	1	1	1	0.70926	1	0.99211	0.97005
YJM1444	0.78152	0.81738	1	0.93046	0.87903	0.9926	0.92895	0.94574
YJM1447	0.77569	0.99237	0.93829	0.99831	0.8338	0.96046	0.97606	1
YJM1450	0.87183	0.84923	0.99116	0.90612	0.82033	0.85442	0.99418	0.91346
YJM1460	1	1	1	1	1	1	1	1
YJM1463	0.91506	1	1	0.99017	0.77429	0.87988	1	1
YJM1477	0.82676	1	1	1	0.81214	1	0.97227	1
YJM1478	0.90624	0.91034	1	0.98785	0.76163	0.98297	0.96495	1
YJM1479	0.78456	1	0.99492	0.8452	0.76855	0.93425	1	0.86993
YJM1526	0.75707	0.95939	1	1	0.57518	0.66683	0.96255	1
YJM1527	0.69621	1	1	0.98239	0.78466	0.97233	0.99432	0.99705
YJM1549	0.89085	1	0.99943	0.98205	0.78165	0.95878	0.99128	0.94936
YJM1573	0.81855	1	1	1	0.87808	1	0.98773	1
YJM1574	1	1	1	1	1	1	0.99881	0.91926
YJM1592	1	1	1	1	1	1	1	1
YJM1628	0.90575	0.97049	1	1	0.92911	0.9624	0.94252	0.98392
YJM1846	1	0.90518	1	1	1	1	0.78027	0.99336
YJM1847	1	1	1	0.9859	1	1	0.99836	0.99366
YJM1869	0.91446	0.99806	1	1	0.96614	0.98127	0.94778	1
YJM1870	0.86056	1	1	1	0.8813	1	1	1

## Sheet: lithium
strain	50mM lithium chloride
S288c	1.167
SK1	1.67403e-05
RM11	0.372642
Sigma1278b	0.00520623
YPS163	0.0332138
YJM789	0.515947
M22	0.940989
YJM189	0.264713
YJM193	0.834455
YJM195	0.12241
YJM244	0.842895
YJM248	1.65993
YJM270	0.303051
YJM271	0.628316
YJM320	0.167207
YJM326	0.29914
YJM428	1.05219
YJM450	0.111831
YJM451	0.0323287
YJM453	0.688997
YJM456	0.125239
YJM470	0.742882
YJM541	0.386757
YJM554	0.385091
YJM555	0.930256
YJM627	0.0853128
YJM681	0.608445
YJM682	0.523825
YJM683	0.224135
YJM689	0.0399012
YJM693	1.40265
YJM969	0.898478
YJM972	1.67233
YJM975	0.695461
YJM978	0.805013
YJM981	1.57663
YJM984	1.12181
YJM987	1.67728
YJM990	0.700223
YJM993	0.827805
YJM996	0.70609
YJM1078	1.84508
YJM1083	0.182396
YJM1129	0.44991
YJM1133	0.180622
YJM1190	0.285286
YJM1199	0
YJM1202	0.00712168
YJM1208	1.65744
YJM1242	0.668316
YJM1244	1.06405
YJM1248	0.0007386
YJM1252	0.224217
YJM1273	0.0617679
YJM1304	0.010964
YJM1307	1.17932
YJM1311	0.672099
YJM1326	0.567094
YJM1332	0.721871
YJM1336	0.532087
YJM1338	0.0950574
YJM1341	0.866244
YJM1342	0.168139
YJM1355	1.00486
YJM1356	0.00259343
YJM1381	0.81005
YJM1383	0.00353319
YJM1385	1.14757
YJM1386	0.0120905
YJM1387	0.240013
YJM1389	0.956731
YJM1399	0.0472364
YJM1400	0.619942
YJM1401	0.204367
YJM1402	0.07605
YJM1415	0.353995
YJM1417	0.424438
YJM1418	0.0467267
YJM1434	0.103173
YJM1439	0
YJM1443	0.180339
YJM1444	7.47806e-05
YJM1447	0.146533
YJM1450	0.914921
YJM1460	0.696625
YJM1463	0.00233123
YJM1477	0.422235
YJM1478	0.409217
YJM1479	0.963282
YJM1526	0.570611
YJM1527	0.0675774
YJM1549	0.467862
YJM1573	0.0248218
YJM1574	0.842998
YJM1592	0.818816
YJM1628	0.6818
YJM1846	0
YJM1847	0
YJM1869	1.08207
YJM1870	0.697935

## Sheet: sodium
strain	1M sodium chloride
S288c	0.741053
SK1	0.628212
RM11	0.577446
Sigma1278b	0.095097
YPS163	0.347913
YJM789	0.659775
M22	0.845052
YJM189	0.290192
YJM193	0.835119
YJM195	0.457816
YJM244	0.789775
YJM248	0.77206
YJM270	0.676665
YJM271	0.729885
YJM320	0.686039
YJM326	0.422855
YJM428	0.734997
YJM450	0.375726
YJM451	0.414277
YJM453	0.735541
YJM456	0.803857
YJM470	0.857653
YJM541	0.747793
YJM554	0.640351
YJM555	0.807623
YJM627	0.2907
YJM681	0.659304
YJM682	0.701648
YJM683	0.642669
YJM689	0.289781
YJM693	0.736786
YJM969	0.79948
YJM972	0.75635
YJM975	0.673908
YJM978	0.771971
YJM981	0.703163
YJM984	0.763541
YJM987	0.68357
YJM990	0.673464
YJM993	0.739159
YJM996	0.726762
YJM1078	0.836769
YJM1083	0.840397
YJM1129	0.566322
YJM1133	0.375035
YJM1190	0.413608
YJM1199	0.000188537
YJM1202	0.223386
YJM1208	0.789029
YJM1242	0.621137
YJM1244	0.841111
YJM1248	0.400374
YJM1252	0.476061
YJM1273	0.303076
YJM1304	0.306955
YJM1307	0.683541
YJM1311	0.623364
YJM1326	0.515965
YJM1332	0.647513
YJM1336	0.486324
YJM1338	0.551983
YJM1341	0.744783
YJM1342	0.548963
YJM1355	0.672678
YJM1356	0.190477
YJM1381	1.00665
YJM1383	0.0804002
YJM1385	0.738592
YJM1386	0.169078
YJM1387	0.433184
YJM1389	0.649754
YJM1399	0.527449
YJM1400	0.683016
YJM1401	0.738477
YJM1402	0.33126
YJM1415	0.473128
YJM1417	0.650874
YJM1418	0.589996
YJM1434	0.462586
YJM1439	0.00726729
YJM1443	0.48452
YJM1444	0
YJM1447	0.214782
YJM1450	0.965768
YJM1460	0.812775
YJM1463	0.379753
YJM1477	0.708096
YJM1478	0.545274
YJM1479	0.767423
YJM1526	0.680072
YJM1527	0.354688
YJM1549	0.598264
YJM1573	0.278172
YJM1574	0.699545
YJM1592	0.690064
YJM1628	0.744718
YJM1846	0
YJM1847	0.000588332
YJM1869	0.816373
YJM1870	0.697933

[truncated: 1 more sheets: pH8.0]
