# Supplementary material for: The 100-genomes strains, an S. cerevisiae resource that illuminates its natural phenotypic and genotypic variation and emergence as an opportunistic pathogen
Source: HighWire-hosted journal article supplement (doi:10.1101/gr.185538.114), 2015-04-03
Supplement: Table_S18.xlsx [file Table_S18.xlsx]

## Sheet: Summary of Sig. Associations
		Summary and complete results of genotype-phenotype association mapping.
phenotype	condition	condition details	p-value for significant associations (approximate Bonferroni threshold of p < 4e-07).	coordinates (number of SNPs)	nearest gene to most significant SNP	notes on significance
biofilm			None	None	-	no associations meet threshold
copper		0.075 mM, 0.1 mM, 0.25 mM	see "copper" sheet	see "copper" sheet	-	discussed in main text; association only present for 0.075 mM and 0.1 mM
drug	amphotericin B	15 mM	3e-07	chrXIII:463261-463264 (2 SNPs)	ATP25	one association below threshold, no clear biological connection
	cycloheximide	0.25 mM, 0.5 mM	see "drugs" sheet	see "drugs" sheet	-	discussed in main text
	ketoconazole	10 mM, 20 mM	see "drugs" sheet	see "drugs" sheet	-	discussed in main text; association only present for 10 mM, not 20 mM
	natamycin	3 mM	3.4e-07 3.8e-07	chrXIII:719364 (1 SNP) chrXV:757677 (1 SNP)	MRE11 MCT1	two associations below threshold, no clear biological connection
flocculation			2.7e-07	chrX:486 (1 SNP)	YJL225C	one association below threshold, no clear biological connection
lithium		50mM	5.0e-10 7.4e-08 3.2e-07	ENA, >2 copies chrIV:537976-538069 (6 SNPs) chrVIII:160969 (1 SNP)	ENA1/2/5 ENA1 VMA16	discussed in main text
sodium		1M	2.0e-07	chrXIV:775521 (1 SNP)	YNR073C	one association below threshold, no clear biological connection
sporulation	KAc plate	25°C, %sporulation	None	None	-	no associations meet threshold
	KAc plate	25°C, %4-spored asci	3.5e-09	chrVII:748804 (1 SNP)	UTP8	one association below threshold, no clear biological connection
	KAc plate	30°C, %sporulation	None	None	-	no associations meet threshold
	KAc plate	30°C, %4-spored asci	5.6e-11 2.7e-08	chrVIII:748804 (1 SNP) chrI:431302 (1 SNP)	UTP8 YPS6	two associations below threshold, no clear biological connection
	diet KAc plate	25°C, %sporulation	4.3e-08 5.1e-08	chrI:224504-224520 (4 SNPs) chrVIII:551141-551207 (6 SNPs)	PHO11 YHR214C-E	two association peaks with multiple SNPs slightly below threshold, no clear biological connection
	diet KAc plate	25°C, %4-spored asci	1.5e-07	chrVIII:303765 (1 SNP)	TRA1	one association below threshold, no clear biological connection
	diet KAc plate	30°C, %sporulation	None	None	-	no associations meet threshold
	diet KAc plate	30°C, %4-spored asci	None	None	-	no associations meet threshold
	liquid Kac	25°C, %sporulation	None	None	-	no associations meet threshold
	liquid Kac	25°C, %4-spored asci	2.1e-07 2.4e-07 2.9e-07 3.5e-07 3.5e-07	chrIV:384397 (1 SNP) chrXIII:86176 (1 SNP) chrXIV:307944 (1 SNP) chrVI:206256 (1 SNP) chrXIII:913395 (1 SNP)	BSC1 PRE8 NOP13 ULI1 FET4	five associations below threshold, no clear biological connection
	liquid Kac	30°C, %sporulation	None	None	-	no associations meet threshold
	liquid Kac	30°C, %4-spored asci	3.6e-07	chrII:171678 (1 SNP)	RRN10	one association below threshold, no clear biological connection
sulfite		3 mM, 6 mM, 9 mM	see "sulfite" sheet	see "sulfite" sheet	-	discussed in main text; ECM34-SSU1 translocation only associated with growth at 6 mM and 9 mM
temperature	SD	15°C	None	None	-	no associations meet threshold
	SD	37°C	None	None	-	no associations meet threshold
	SD	39°C	None	None	-	no associations meet threshold
	SEG	15°C	None	None	-	no associations meet threshold
	SEG	37°C	None	None	-	no associations meet threshold
	SEG	39°C	None	None	-	no associations meet threshold
	YPD	15°C	6.2e-09 1.6e-07	chrII:770543 (1 SNP) chrXIV:116131 (1 SNP)	SSH1 CAF120	two associations below threshold, no clear biological connection
	YPD	37°C	see "temperature" sheet	see "temperature" sheet	-	many associations below threshold, no clear biological connection
	YPD	39°C	None	None	-	no associations meet threshold
	YPEG	15°C	None	None	-	no associations meet threshold
	YPEG	37°C	None	None	-	no associations meet threshold
	YPEG	39°C	None	None	-	no associations meet threshold
vitamin auxotrophy	-biotin		None	None	-	no associations meet threshold
	-inositol		see "vitamins" sheet	see "vitamins" sheet	-	very large number of associations below threshold, very wide peaks encompassing hundreds of kilobases in some cases
	-niacin		3.8e-12 1e-08 1.2e-07 2.1e-07	chrIV:698 (1 SNP) chrVII:1083282 (1 SNP) chrM:12742 (1 SNP) chrX:574139(1 SNP)	COS7 COS6 COX1 HOC1	four associations below threshold, no clear biological connection
	-p-aminobenzoic acid, -folic acid		1.2e-09 4.9e-08	chrXVI:144971 (1 SNP) frameshift/stop in YOR043W	YPL216W YOR043W	two associations below threshold, no clear biological connection
	-pantothenate		None	None	-	no associations meet threshold
	-pyridoxine		see "vitamins" sheet	see "vitamins" sheet	-	discussed in main text
	-riboflavin		see "vitamins" sheet	see "vitamins" sheet	-	three associations below threshold, no clear biological connection
	-thiamine		see "vitamins" sheet	see "vitamins" sheet	-	many associations below threshold although none far below, no clear biological connection

## Sheet: copper
resistance to copper
0.075 mM
chrom	pos	number SNPs	min p-value	closest gene(s)
CUP1, 3 or more copies			1.3e-16	CUP1
0.1 mM
chrom	pos	number SNPs	min p-value	closest gene(s)
CUP1, 3 or more copies			1.9e-17	CUP1
0.25 mM
chrom	pos	number SNPs	min p-value	closest gene(s)
chrXVI	173979-181568	3	2.2e-11	RPL7B,RSA1
chrVIII	223812-244520	6	3.3e-11	HTD2,OSH3,PCL5,RPP1,TRM5
chrVIII	259324-267630	2	3.3e-11	IRE1,LRP1
chrV	96610-98565	2	4.7e-11	BUD16,ECM10
chrVII	42627-70413	6	7.8e-11	HAP2,KAP114,RTF1,TAN1,VID30
chrIX	310436	1	1.8e-10	YKE4
chrVIII	197968-205962	4	1.9e-10	AAP1,INM1,YHK8
chrXV	277467	1	1.1e-09	YOL024W
chrIII	3939	1	1.3e-09	GEX1
chrV	85693	1	1.5e-09	HYP2
chrXIII	468051-468499	3	3e-09	MUB1,SRT1
chrVII	615761	1	1.7e-08	ADE6
chrXV	782167	1	2.5e-08	HES1
chrXVI	754310-757660	2	2.6e-08	RGC1,YPR114W
chrXI	348254-352980	2	2.9e-08	DCW1,ELM1
chrXI	372538-373968	2	2.9e-08	TUL1
chrXI	556779-557098	2	2.9e-08	UTP30
chrXIV	478868	1	2.9e-08	TPM1
chrV	387695	1	3.1e-08	LSM4
chrXI	575805	1	3.2e-08	DRE2
chrXV	111081-112248	2	4e-08	INO4,YOL107W
chrIV	628582	1	5.4e-08	RLI1
chrII	640141	1	5.8e-08	2,DUR1
chrXIII	819989	1	6.6e-08	DSK2
chrXIII	228874	1	6.9e-08	APT1
chrXIV	573515	1	8.4e-08	YNL033W
chrXI	604648-605055	2	1.1e-07	TVP38
chrXIII	899812	1	1.1e-07	TGL3
chrII	716391	1	1.3e-07	HIS7
chrIX	292353	1	2.2e-07	ULP2
chrIV	1292515	1	2.5e-07	STE14
chrXI	641599	1	3.4e-07	SIR1
chrXIV	357746	1	4e-07	MEP2

## Sheet: drugs
cycloheximide, 0.25 mM
chrom	pos	number_snps	min_p_value	closest_genes
PDR5 introgression	NA	1	4.2e-12	PDR5
chrXV	612971-624551	174	1.2e-09	PDR5,RPB2,YOR152C
cycloheximide, 0.5mM
chrom	pos	number_snps	min_p_value	closest_genes
PDR5 introgression	NA	1	1.3e-08	PDR5
chrXV	621555-621657	6	2.1e-07	PDR5
natamycin, 3mM
chrom	pos	number_snps	min_p_value	closest_genes
chrXIII	719364	1	3.4e-07	MRE11
chrXV	757677	1	3.8e-07	MCT1
ketoconazole, 10mM
chrom	pos	number_snps	min_p_value	closest_genes
PDR5 introgression	NA	1	5.3e-09	PDR5
ketoconazole, 20mM
chrom	pos	number_snps	min_p_value	closest_genes
chrXI	115888	1	1e-07	LST4
amphotericin B, 15mM
chrom	pos	number_snps	min_p_value	closest_genes
chrXIII	463261-463264	2	3e-07	ATP25

## Sheet: sporulation
sporulation
liquid sporulation results
phenotype	media	temperature	chrom	pos	number SNPs	p-value	closest gene
% sporulation	Kac	25	chrIII	210436	1	9.7e-08	IMG1
% four-spored	Kac	25	chrIV	384397	1	2.1e-07	BSC1
% four-spored	Kac	25	chrXIII	86176	1	2.4e-07	PRE8
% four-spored	Kac	25	chrXIV	307994	1	2.9e-07	NOP13
% four-spored	Kac	25	chrVI	206256	1	3.5e-07	ULI1
% four-spored	Kac	25	chrXIII	913395	1	3.5e-07	FET4
% four-spored	Kac	30	chrII	171678	1	3.6e-07	RRN10
plate sporulation results
phenotype	media	temperature	chrom	pos	number SNPs	p-value	closest gene
% four-spored	KAc	30	chrVII	748804	1	5.57967e-11	UTP8
% four-spored	KAc	25	chrVII	748804	1	3.52943e-09	UTP8
% four-spored	KAc	30	chrIX	431302	1	2.66481e-08	YPS6
% sporulation	diet KAc	25	chrI	224471-224520	5	4.28303e-08	PHO11
% sporulation	diet KAc	25	chrVIII	551108-551207	7	5.08469e-08	YHR214C-E
% four-spored	diet KAc	25	chrVIII	303765	1	1.49114e-07	TRA1
% four-spored	diet KAc	25	chrVI	139529-139533	2	7.2984e-07	MSH4
% sporulation	KAc	25	chrX	501349	1	7.8236e-07	HUL4
% four-spored	diet KAc	25	chrIV	518027	1	9.24951e-07	YDR034C-A
% four-spored	diet KAc	25	chrIX	136215	1	9.33982e-07	QDR1
% four-spored	diet KAc	25	chrXIV	565893	1	9.47945e-07	YNL035C
% sporulation	KAc	25	chrII	555369	1	9.75132e-07	ICS2

## Sheet: sulfite
resistance to sulfite
3 mM						6 mM						9 mM
chrom	pos	number_snps	min_p_value	closest_genes		chrom	pos	number_snps	min_p_value	closest_genes		chrom	pos	number_snps	min_p_value	closest_genes
chrXVI	538825-540732	2	7.3e-12	CHL1,TAE2		ECM34_SSU1_translocation	NA	1	6.3e-28	NA		ECM34_SSU1_translocation	NA	1	6.2e-28	NA
chrVII	578794	1	1.4e-09	BUD9		chrXVI	365099-374422	6	1.5e-16	EEB1,MSY1,SSU1		chrVIII	11987-16698	8	1.5e-15	ECM34,PAU13,YHL042W
YER028C_FS_stop	NA	1	3.1e-09	NA		chrXVI	395378-410239	6	2e-16	ATP4,BRO1,MOT1,RPS9A,YPL077C		chrIX	8252-8857	2	7.7e-15	PAU14
chrX	28422	1	4.8e-09	HXT8		chrVIII	11987-16698	7	3.9e-15	ECM34,PAU13,YHL042W		chrX	8840	1	8.6e-15	PAU1
chrXIII	664500	1	1.4e-08	CLN1		chrIX	8252-8857	2	1.2e-14	PAU14		chrXVI	395378-410239	5	8.9e-15	BRO1,MOT1,RPS9A,YPL077C
chrXIV	598218	1	1.7e-08	YNL019C		chrX	8840	1	1.5e-14	PAU1		chrVIII	62860-68986	3	1.7e-13	APM2,SPO11
chrXII	407561-409752	2	2.5e-08	CKI1,USB1		chrVIII	62860-68986	3	7.6e-14	APM2,SPO11		chrIX	438766-438892	3	6.6e-13	YIR042C
chrXIV	777746	1	3.8e-08	AIF1		chrVIII	46074-47642	2	6.2e-12	OCA5		chrXVI	365099-374422	6	1.1e-12	EEB1,MSY1,SSU1
chrVIII	20294	1	4.5e-08	ARN1		chrIX	438766-438892	3	5.6e-11	YIR042C		chrVIII	30465-32584	2	9.3e-12	VMR1
chrII	298906	1	4.9e-08	RKM3		chrIV	605775-614061	3	7.5e-11	STN1,TVP23,VPS41		chrVIII	46074-47642	2	1.2e-11	OCA5
chrXVI	363203	1	8.7e-08	ATG21		chrVIII	30465-32584	2	3e-10	VMR1		chrIV	610809	1	1.2e-10	STN1
chrM	59125	1	1.2e-07	SCEI		chrVI	245128	1	8.1e-10	BNA6		chrVI	245128	1	1.6e-10	BNA6
chrIV	1426065-1426086	3	1.5e-07	VPS72		chrIV	631409-637598	2	6.5e-09	DNF2,GIS1		chrVII	417098	1	2e-10	RNA15
chrXIV	459529	1	1.5e-07	TOP2		chrV	262671	1	7e-09	GIP2		chrV	262671	1	2.5e-10	GIP2
chrXVI	303834-304420	2	1.5e-07	RPL5,SPO19		chrXIII	688957	1	1.8e-08	YMR210W		chrIV	859170-859173	2	3.8e-10	COQ4
chrX	73608	1	1.6e-07	RPS14B		chrXV	766858-768292	2	2.6e-08	WTM2,YOR228C		chrXIII	127104	1	2.5e-09	TCB3
chrVII	1006496-1009617	5	1.8e-07	MTM1,RAD2		chrVIII	100135	1	2.7e-08	MRP4		chrXIII	688957	1	3.5e-09	YMR210W
chrXVI	230703	1	1.8e-07	MEX67		chrI	27511	1	2.9e-08	FLO9		chrIV	65329	1	4.2e-09	DTD1
chrII	66122	1	2.4e-07	BOI1		chrIV	859170-859173	2	3.6e-08	COQ4		chrXII	1054544-1063374	3	5.7e-09	PAU4,YLR455W
chrXII	931449	1	3e-07	RPL31B		chrVII	417098	1	3.7e-08	RNA15		chrIV	631409-637598	2	1e-08	DNF2,GIS1
chrXII	858544	1	3.1e-07	MDM30		chrXII	1054776	1	4.5e-08	YLR455W		chrX	713298-713845	4	1e-08	DAN4
chrXIV	155171	1	3.3e-07	ORC5		chrXI	490442	1	4.9e-08	GCN3		chrXIV	733487	1	1e-08	BIO4
chrII	515310-515320	2	3.5e-07	YBR138C		chrX	713298-713845	4	5.3e-08	DAN4		chrIV	675982	1	1.1e-08	FOB1
chrX	367233	1	3.9e-07	NSP1		chrXIII	127104	1	5.5e-08	TCB3		chrXV	766858-768292	2	1.3e-08	WTM2,YOR228C
						chrXII	203926	1	6.1e-08	YLR030W		chrX	489046	1	1.4e-08	GEA1
						chrM	13981	1	6.4e-08	COX1		chrXI	490442	1	1.5e-08	GCN3
						chrIX	121004	1	7.2e-08	STH1		chrI	27511	1	1.6e-08	FLO9
						chrIV	65329	1	1e-07	DTD1		chrXIII	114469	1	1.6e-08	WAR1
						chrV	379541	1	1e-07	KAP123		chrV	623-1544	3	2.3e-08	YEL077C
						chrXIII	114469	1	1e-07	WAR1		chrVII	1082916-1083509	2	2.3e-08	COS6
						chrVIII	396899-402964	2	1.1e-07	RTT107,SKG6		chrXII	203926	1	3.1e-08	YLR030W
						chrXVI	122212	1	1.1e-07	NEW1		chrVIII	100135	1	4e-08	MRP4
						chrIX	74002	1	1.6e-07	ATG32		chrVIII	396899-402964	2	4e-08	RTT107,SKG6
						chrXII	124295-128877	2	1.6e-07	PUF3,SOF1		chrXVI	122212	1	4e-08	NEW1
						chrM	83435	1	1.9e-07	COX3		chrI	1444	1	4.5e-08	PAU8
						chrIV	257828	1	2e-07	ATG20		chrIV	1212170	1	4.5e-08	YDR366C
						chrIV	582370	1	2.3e-07	RTR2		chrXIII	138257	1	4.9e-08	ITT1
						chrV	554104	1	2.3e-07	FAU1		chrVII	555705-557700	2	5.8e-08	RPL26B,YGR035W-A
						chrII	340466	1	2.4e-07	YBR053C		chrM	11710-13981	2	5.9e-08	COX1
						chrIV	1375354	1	2.4e-07	TOM1		chrV	554104	1	6.3e-08	FAU1
						chrVI	220441	1	2.4e-07	RPL2A		chrXII	124295-128877	2	6.9e-08	PUF3,SOF1
						chrXIV	571876	1	2.4e-07	YNL034W		chrIV	1375354	1	7e-08	TOM1
						chrV	336687	1	2.5e-07	PTC2		chrM	83435	1	8.5e-08	COX3
						chrXVI	481127	1	2.7e-07	MET31		chrIV	257828	1	8.7e-08	ATG20
												chrX	210630	1	8.7e-08	GZF3
												chrIX	121004	1	1.1e-07	STH1
												chrXIV	309197	1	1.5e-07	MDG1
												chrIV	514138	1	1.6e-07	LYS14
												chrXIII	393150	1	1.6e-07	RNA14
												chrXVI	61921	1	1.7e-07	YPL257W
												chrXII	379289	1	1.8e-07	CFT2
												chrIII	107000	1	1.9e-07	VMA9
												chrXIV	464233	1	2.6e-07	TCB2
												chrXIV	782638	1	2.7e-07	PAU6
												chrVI	220441	1	2.9e-07	RPL2A
												chrIV	1404217	1	3e-07	TRS31
												chrXV	952849	1	3.3e-07	KRE5
												chrI	137074	1	3.5e-07	FUN14
												chrIV	1442315	1	3.8e-07	PUF6

## Sheet: temperature
temperature
media	temperature	chrom	pos	number SNPs	min p-value	closest gene(s)
YPD	37	chrX	592344	1	4.8e-14	GRR1
YPD	37	chrIX	328581-333735	2	6.1e-13	PDR11,TIR3
YPD	37	chrVII	651197	1	3.2e-11	PDC6
YPD	37	chrXVI	4223-8627	2	2e-10	PAU22,YRF1-7
YPD	37	chrXII	776373-783735	3	2.5e-10	MMS22,TMA10,YLR326W
YPD	37	chrVIII	454605	1	2.6e-10	FMO1
YPD	37	chrXIII	330956-333053	5	2.6e-10	EIS1,RSF1
YPD	37	chrIV	144642-144730	2	5.2e-10	AIR2
YPD	37	chrX	545926	1	7.1e-10	PTK2
YPD	37	chrVIII	262231	1	3.9e-09	SAE3
YPD	15	chrII	770543	1	6.2e-09	SSH1
YPD	37	chrXVI	174252	1	7.6e-09	RPL7B
YPD	37	chrXVI	199717-200253	4	9.8e-09	RTT10
YPD	37	chrXIII	310028	1	6e-08	YMR018W
YPD	37	chrXV	447627	1	6.1e-08	CYT1
YPD	15	chrXIV	116131	1	1.6e-07	CAF120
YPD	37	chrXVI	210317-210648	2	1.9e-07	PPQ1
YPD	37	chrVIII	177078	1	2.1e-07	PIH1
YPD	37	chrIV	154912	1	2.2e-07	GLT1
YPD	37	chrIV	424011	1	2.3e-07	CDC7
YPD	37	chrXV	101304	1	2.4e-07	PAP2
YPD	37	chrII	45152	1	2.5e-07	ROX3
YPD	37	chrI	205208	1	2.6e-07	FLO1
YPD	37	chrXV	386160-386296	3	2.9e-07	DFG16
YPD	37	chrVII	1024097	1	3.4e-07	YGR266W
YPD	37	chrVII	4246	1	3.9e-07	COS12

## Sheet: vitamins
vitamins
-inositol						-niacin						-p-aminobenzoic acid, -folic acid						-pyridoxine						-riboflavin						-thiamine
chrom	pos	number SNPs	min p-value	closest gene(s)		chrom	pos	number SNPs	min p-value	closest gene(s)		chrom	pos	number SNPs	min p-value	closest gene(s)		chrom	pos	number SNPs	min p-value	closest gene(s)		chrom	pos	number SNPs	min p-value	closest gene(s)		chrom	pos	number SNPs	min p-value	closest gene(s)
chrIV	731588-796541	62	3.2e-14	CDC37,CPR1,CTH1,CWC15,DOP1,EKI1,ENT5,HPR1,KGD2,MKC7,NUM1,PEX7,RPA14,SAC3,SAN1,SEC5,SEC7,SSY1,SWI5,TAF12,TRM82,YDR161W,YDR169C-A		chrIV	698	1	3.8e-12	COS7		chrXVI	144971	1	1.2e-09	YPL216W		chrXIII	458460	1	6.8e-14	SNZ1		chrIII	148793-153547	7	2.9e-12	MAK32,SRD1		chrIX	2987-5488	2	3.4e-10	YIL177C
chrV	535145-552107	8	1.4e-12	BMH1,BRR2,ECM32,FMP10,PDA1,SLO1		chrVII	1083282	1	1e-08	COS6		YOR043W_FS_stop	NA	1	4.9e-08	YOR043W		chrVIII	80515-97662	4	1.1e-08	ETP1,STE20,YHL008C,YHL012W		chrII	274316	1	2.2e-08	GAL7		chrVII	541981	1	6.4e-10	MSP1
chrXIII	354798-395049	115	2.9e-12	AAC1,ARG7,BUB2,CSM3,ERB1,FAR3,FET3,IOC4,MCM1,NUP116,RNA14,SAM37,SEN15,STV1		chrM	12742	1	1.2e-07	COX1								chrIII	70569-80341	2	1.2e-08	KCC4,RNQ1		chrVII	199929-200019	2	3.1e-08	YIP5		chrII	384957-387032	2	1e-09	RDH54,YBR074W
chrXVI	739133-802127	45	3.4e-12	AXL1,CLB2,CLB5,COG4,CTF4,CTR1,ISR1,MRI1,MSS18,RGC1,RPC40,RPN7,SPN1,THI22,YLH47,YPR109W,YPR114W,YPR117W,YPR127W,YTH1		chrX	574139	1	2.1e-07	HOC1								chrXIII	483306-492500	5	1.2e-08	HFD1,ILV2,MYO5,SPG4,YMR111C		chrXIII	540486-540505	2	4e-08	GID8		chrXI	94705	1	1.2e-09	ASH1
chrXV	1059960-1066203	5	3.8e-12	FIT2,FIT3,FRE5,YOR385W														chrVII	1022427-1026411	2	3.8e-08	HUA1,YGR266W		chrVII	6899-8987	2	6.1e-08	YGL260W,YPS5		chrXII	1044631-1045548	2	1.2e-09	FMP27
chrXIII	600972-622620	22	1.1e-11	ALD2,ALD3,CTL1,ECM5,MMT1,SPT21,YMR175W-A,YMR178W														chrVII	1037169-1055478	8	3.8e-08	CWC22,RNH70,RTT102,SLH1,TAF1,YOR1		chrII	720512	1	7.6e-08	SPO23		chrVII	230195	1	1.3e-09	TIP20
chrVII	823456-956978	127	1.3e-11	ADE3,AMA1,ATF2,AZR1,BUB1,CBP4,CCH1,CIR1,CRH1,CRM1,DIE2,ELP2,ERG1,FYV8,GPI1,GTR2,HGH1,HIP1,MRPL9,MRPS35,MSM1,MVB12,PBP1,PCT1,PHO81,PMT6,PSD2,QCR9,RBG2,RNR4,RPS0A,RSM27,RTA1,SER2,SKI6,SLI1,SMI1,TDA10,TFG1,TIF4631,TRS65,TYS1,UBR1,XKS1,YGR168C,YGR174W-A,YGR201C,YGR210C,YIP1,YPP1,ZPR1														chrIV	454191	1	4.7e-08	RCR2		chrII	285688	1	9.6e-08	CHS3		chrVII	908510	1	1.9e-09	ADE3
chrIX	102742-105556	2	1.3e-11	ASG1														chrVIII	142368	1	2.1e-07	DED81		chrVII	59505	1	1.8e-07	SEC15		chrXVI	382009	1	1.9e-09	YPL088W
chrXII	65049-65606	2	1.3e-11	ENT4,UBI4														chrXIII	546586	1	3.2e-07	RIM11		chrVII	421846	1	3e-07	HEM2		chrIX	258188	1	4.8e-09	MMF1
chrXV	429624-438954	10	1.3e-11	ASE1,VHS3,YOR059C														chrIV	593321	1	3.7e-07	SNF11		chrVIII	68079	1	3e-07	APM2		chrXV	769008	1	6e-09	WTM2
chrXVI	121592-129148	9	1.3e-11	GRE1,MMT2,NEW1,YPL225W														chrXV	405	1	3.8e-07	YOL166W-A		chrXI	562485	1	3.5e-07	OAF3		YBR072C-A_introgress	NA	1	6.3e-09	NA
chrIV	96674	1	1.4e-11	ACK1																										chrXVI	725291	1	1.1e-08	YPR097W
chrXIII	476647-483557	3	7.6e-11	PGM2,SPG4,YKU80																										chrIX	326249-329671	2	4.1e-08	MNT3,PDR11
chrXII	493890-623512	102	2.4e-10	ADY4,ARV1,ATG26,BNA5,CBF5,CCC1,CDC123,CDC42,COQ9,ECM22,ENT2,FAR10,FRE1,HMX1,HRD3,IFH1,LIP2,MDL1,MMR1,MSC3,NMT1,NOP56,PEX13,PNP1,PWP1,RFX1,RSA3,SAM1,SEC10,SHH4,SKG3,SWI6,THI7,TOP3,TOS4,TUB4,YKE2,YLR173W,YLR179C,YLR211C,YLR224W,YLR225C																										chrXVI	228282	1	4.4e-08	DAP1
chrIV	232216-341786	65	2.7e-10	ASM4,ATG20,BDF2,BRE1,BUG1,CBS1,CDC48,COX9,CYK3,DUN1,IDP1,LUC7,MRK1,NSE4,NUP84,PMT1,PMT5,QRI1,RAM1,RPL13A,RPL31A,RPN6,RPP1A,RPS16B,RPS29B,RXT3,SNA4,THI3,TRM3,TSR1,UBC9,VAM6,YDL063C,YDL086W,YDL109C,YDL114W,YDL129W,YET3																										chrX	296106	1	5e-08	NET1
chrIV	887150-947379	47	5.3e-10	ADR1,AHA1,AMD2,CRF1,FMN1,GTB1,HEM1,HTA1,HTB1,LYS4,MRPL7,RAD9,SIR4,SNU56,SPR28,TCP1,UPC2																										chrII	366347	1	7.1e-08	YBR062C
chrII	54925-178447	103	8.8e-10	AAR2,APL3,ATG8,BOI1,CMC2,COR1,ECM13,EDE1,FUI1,HEK2,ILS1,KIP1,KTI11,LSM2,MRPL16,NUP170,PET112,PIM1,PIN4,POL12,PRE7,PRX1,PSY4,RIB1,RPL19B,RPL23A,SAS3,SEF1,SHP1,SKT5,STU1,TEL1,URA7,YBL029W,YBL055C,YBL059W,YBL081W,YBL086C,YEL1																										chrIV	1139183	1	7.1e-08	SWR1
chrIV	1003597-1125228	117	8.8e-10	ASP1,ATP5,BFR2,BSC2,CCC2,CIA1,DON1,DPL1,DPP1,GIC2,HIM1,HNT2,HRQ1,INM2,IPK1,MCM21,MSW1,MTH1,NSE3,PEP7,PIB1,PMP3,RAD34,RNH202,RSC3,RTT103,SKP1,SRP101,SSD1,SSF2,SUM1,SUR2,TFB1,UTP4,YCG1,YDR282C,YDR307W,YSP2,ZIP1																										chrIV	1513500	1	7.1e-08	FDC1
chrXVI	513853-663321	129	8.8e-10	AGC1,AIM45,APL4,ARP7,ATG11,ATH1,ATP20,CCL1,CHL1,CIT3,CSR2,CTF19,DSS4,EAF3,HAA1,HAT1,HST2,ICL2,LSP1,MCM4,MRPS16,MSF1,NCR1,NTO1,PDH1,REC8,RLF2,RPA135,RPL43A,SNF8,SRO7,SUT2,SWI1,TAE2,TAF3,TAH18,THP3,TIF5,TIP41,ULA1,ULP1,VMA13,YOP1,YPR003C,YPR010C-A,YPR011C,YPR013C,YPR015C,YPR022C,YPR036W-A																										chrIV	1481547-1491441	4	7.1e-08	RBA50,URC2
chrVI	46161-218724	210	9.4e-10	ACT1,AGX1,AIM13,ATG18,AUA1,BLM10,BST1,BUD27,CAF16,CDC4,CMK1,DCV1,DEG1,ECO1,EPL1,FAB1,FRS2,GAT1,GCN20,GNA1,GSY1,GYP8,HAC1,HIS2,HSP12,HXT10,IES1,IGD1,IOC3,LOC1,LPD1,MDJ1,MET10,MSH4,NIC96,PAU5,PES4,PTR3,RIM15,ROG3,RPL22B,RPN11,RPO41,SAD1,SEC4,SMC2,SMX2,SPB4,STE2,TUB2,UBP6,ULI1,WWM1,YFH7,YFL012W,YFL034W,YFL042C,YFR006W,YFR012W-A,YFR016C,YFR018C																										chrV	22215-28571	2	7.1e-08	HXT13,SIT1
chrVII	532147	1	1e-09	THG1																										chrVII	417568-425755	2	7.1e-08	DST1,OCH1
chrXII	105420-110610	4	1e-09	COX19,DPS1,SPA2																										chrXII	403348	1	7.1e-08	ZRT2
chrVII	427807	1	1.1e-09	PNC1																										chrX	106622	1	7.5e-08	QCR8
chrXV	459089	1	1.1e-09	NRT1																										chrX	699622-705905	3	7.6e-08	BAT2,PMT4
chrXV	1037415	1	1.2e-09	NUD1																										chrXI	518221-519275	2	7.6e-08	UTH1,YKR041W
chrXII	228820-314762	81	1.5e-09	ARP6,CSF1,EMP46,EMP70,ERG3,FMP25,FRS1,GAL2,IES3,MNL2,OSW2,PDC1,PER33,RAX2,REX2,RGR1,RPS0B,SHM2,SMC4,SPT8,STU2,TRX1,XYL2,YLR040C,YLR042C,YLR049C,YLR053C,YLR063W,YLR072W																										chrXIV	757426	1	8.6e-08	DSE4
chrVIII	115734-189521	72	1.6e-09	ARD1,ARG4,BCD1,BRL1,DAP2,DIA4,ERG11,MAS2,MIP6,MSC7,MYO1,PUT2,RPN1,RPS27B,RRM3,SLT2,SOD2,SPO13,SRB2,STP2,TDA3,TIM10,YHI9,YHR007C-A,YHR020W,YHR022C,YHR022C-A,YHR033W,YHR035W,YSC83																										chrXIV	588107	1	9.3e-08	FAP1
chrXI	645889-664413	7	1.7e-09	FLO10,GEX2,NFT1																										chrII	4350	1	1e-07	YBL111C
chrXV	414444-418654	2	3.7e-09	DBP5,RAT1																										chrXII	1032561	1	1e-07	HMG2
chrIV	206254-211121	4	5.2e-09	RPO21,SCM3																										chrXVI	558141	1	1.3e-07	PDH1
chrXVI	703890-705963	2	5.2e-09	GRS2,MDM36																										chrIV	1503400	1	1.4e-07	FIT1
chrIX	383441-395522	14	5.9e-09	MET28,MRS1,MUC1,YAP5,YIR016W,YIR018C-A																										chrXIV	172071	1	1.4e-07	MRPL17
chrXII	778976	1	8.1e-09	CWC24																										chrXIV	236209	1	1.4e-07	ALG9
chrXIV	410953-418494	5	8.1e-09	DBP2,NOP15,YNL115C																										chrVII	259969-263078	2	1.6e-07	ITC1,SNT2
chrXII	644869	1	8.6e-09	NDL1																										chrXV	752732	1	1.6e-07	STE13
chrIV	50586	1	1e-08	GCS1																										chrXIV	777813	1	1.7e-07	AIF1
chrXV	387907	1	1.1e-08	DFG16																										chrVI	119659	1	2.1e-07	SMC1
chrXVI	105969	1	1.1e-08	NSL1																										chrXV	34557	1	2.1e-07	ZPS1
chrXVI	370709	1	1.1e-08	SEC62																										chrXIV	16607	1	2.7e-07	AAD14
chrIX	137856-144528	2	1.2e-08	NUP159,RPI1																										chrXIV	264232	1	2.8e-07	YNL200C
chrXIII	633458	1	1.3e-08	HSC82																										chrVII	673392	1	3.2e-07	VAS1
chrVII	485387	1	1.4e-08	YGL006W-A																										chrI	75376	1	3.5e-07	RBG1
chrXVI	316205	1	1.4e-08	KAP120																										chrIV	557605	1	3.5e-07	DET1
chrIII	300520-315783	21	1.7e-08	YCR099C,YCR100C,YCR101C,YCR102C,YCR108C																										chrV	311575	1	3.5e-07	PTP3
chrIV	651460-655090	8	2.3e-08	BMH2,TVP15
chrXIII	172118-343482	183	2.3e-08	ADI1,AIM34,AMD1,APT1,BUD22,CAT2,CDC5,CGI121,CLU1,CSI1,EIS1,ERG5,FAR8,FMS1,GAL80,GIS4,GLO1,GSF2,HOF1,HXT2,IMP2,MAC1,MIH1,MRPL3,MSS1,MVP1,NDC1,NSE5,PEX12,PLB1,PLB2,PPZ1,PRM6,PRP39,PSP2,RAD52,RPS18B,RRN11,RSE1,RSF1,SEC59,SOK2,SPO20,SPT5,SRC1,STB4,TAF11,TRM12,TRM9,UBC7,UBX2,UNG1,USA1,YAP1,YMD8,YML002W,YML003W,YML007C-A,YML018C,YML020W,YMR001C-A,YMR010W,YOX1,YPT7
chrXI	584818-597889	14	2.4e-08	DAD2,HBS1,MSA2,MTD1,NUP133,TRZ1,YKR078W
chrIV	831259-869203	29	2.9e-08	ATC1,CBS2,CCT6,EBS1,HST4,MSC2,MSS116,MSS4,NUP42,RAV2,RKM2,SLY1,SPC19,UME6,YDR186C,YDR194W-A
chrVIII	320071-525043	221	2.9e-08	AIM18,AIM46,ANS1,APE4,ARO9,ARP1,BAT1,BZZ1,CDC12,CHS7,CRP1,CTF8,CTM1,DCD1,DMA1,DNA2,DSE2,ECM14,ERG9,FLO5,FMO1,GGA2,GND1,GRE3,IKI1,KEL1,KIC1,LIN1,MNL1,MRPL6,MSH1,MTC6,MTG2,NDT80,NVJ1,ORC6,OYE2,PEX18,PEX28,PPX1,PRP8,RIX1,RPL42B,RPN10,RTT107,SBE22,SCH9,SET1,SET5,SKG6,SPC97,SPO12,SPO16,SPS100,SSP1,STB5,SVP26,TDA11,TRR2,UTP9,YAP1801,YCK1,YHR112C,YHR127W,YHR131C,YHR140W,YHR162W,YHR177W,YHR182W,YHR192W,Y…
chrXV	222314-252641	28	2.9e-08	AIM39,DDR2,GAL11,GPM3,GSH2,NGL1,NOP12,PEX15,PSH1,PSK2,SPE2,THI20,YOL047C,YOL057W
chrIV	494625-553681	42	3e-08	ARO3,BAP3,EHD3,ENA1,ENA2,HEM12,HEM13,LYS14,MIC14,MRH1,NRG1,RAD28,REG1,RPC11,RSM10,VMS1,VPS54,YDR034C-A
chrVII	271853-333755	77	3e-08	CDC20,COQ8,LSG1,MET13,MLC1,NAB2,NSA1,PAN2,PRP43,RMD9,RPL28,RPS2,SCS3,SEH1,SLD3,SNF4,SRM1,TOS8,USE1,VPS45,YGL101W,YGL108C,YGL114W,YGL117W
chrXIV	188308-298424	75	3e-08	ATG2,BNI4,CHS1,CNM67,CSL4,DUG3,IPI3,JJJ1,KAR1,KEX2,LAP3,NAR1,NPR1,POP1,RIO2,RRG9,SIN4,SLA2,SLZ1,SPS18,SPS19,SQS1,SRP1,SSB2,SSU72,SWT21,UBP10,VID27,WHI3,YNL181W,YNL190W,YNL193W,YNL194C,YNL200C,YNL217W,YNL234W,ZWF1
chrXVI	191750-225876	34	3e-08	COX10,CTI6,CUP9,MF(ALPHA)1,MRN1,MRPL40,NIP100,POS5,PPQ1,RTC6,RTT10,TCO89,TRE1,UIP4
chrXV	609108-609993	4	3.2e-08	SMP3,SPP2
chrII	425770-610829	242	3.5e-08	AGP2,AIM3,ALG1,AMN1,APD1,ARA1,ARL1,CCZ1,CDC28,CMD1,CNS1,CYC8,DTR1,ECM31,EHT1,EXO5,EXO84,FES1,FZO1,GDT1,HSL7,ICS2,IFA38,IML3,IRA1,LYS2,MAK5,MEC1,MMS4,MRPL36,MSI1,NHP6B,NTC20,OPY1,PBY1,PCH2,PEX32,PHO88,POL30,POP7,RAD16,RPL21A,RPS6B,RPS9B,RTC2,SHE3,SIF2,SLI15,SMP1,SMY2,SPP381,SSE2,SUP45,SUS1,TBS1,TEF2,TFC1,TKL2,TPS1,TYR1,UBS1,VID24,VMA2,VPS15,YBR137W,YBR138C,YBR139W,YBR141C,YBR182C-A,YBR184W,YSA1,YS…
chrIV	1216327-1528283	350	3.7e-08	ADE8,AGE1,APA2,APT2,ARO10,ARO80,ATO3,ATP17,BNA7,CYM1,DFM1,DIG2,DIT1,DIT2,DOT1,DYN2,ECM11,EMI1,EMI2,EUG1,FDC1,FIT1,FPR2,GIN4,GMC1,GNP1,GRH1,GRX2,GUK1,HEH2,HLR1,IRC4,ITR1,IZH1,JIP4,KRE2,LCD1,LPP1,LRS4,LSM6,MFA1,MUS81,MZM1,NHX1,NKP1,PAC11,PAU10,PDR15,PFA5,PHO8,PKH1,PKH3,PLM2,PPN1,PPZ2,PRP3,PSP1,PUF6,QCR7,RAD30,RBA50,RGA2,RIB3,RMT2,RPL27B,RPS17B,RPS18A,RSM28,RVS167,SAM2,SDC1,SEC20,SIP1,SIZ1,SLD5,SLF1…
chrX	160491-394810	238	3.7e-08	AIM23,ALY2,ARP4,ASF1,BCK1,BNA3,CHS6,COA3,DPB11,EXO70,GCD14,GSH1,GSM1,GWT1,GYP6,GZF3,HCA4,ICS3,IKS1,IME2,IML2,IRC18,IRC8,KHA1,LAS21,LOH1,LSB6,MAD2,MDV1,MEF2,MHP1,MRPL8,MRS3,NCA3,NET1,NIT2,NSP1,NUP192,NUP82,PAM16,PEP8,PRY1,PRY3,RNR2,RRN7,RTT101,SAP185,SCP160,SET4,SIP4,SMC3,SNX4,SPT10,SRS2,TAD2,TAX4,TDH1,TOK1,TRK1,TRL1,UBX6,URA2,UTP10,UTP18,VPS53,YHC3,YJL028W,YJL043W,YJL045W,YJL068C,YJL070C,YJL107C,…
chrI	537	1	4.3e-08	PAU8
chrXIV	134681	1	4.3e-08	BNI1
chrVIII	252105	1	5.3e-08	PTC7
chrVI	260286-260788	3	6.5e-08	IRC7
chrIV	354127	1	7.7e-08	MBP1
chrXI	608511-625044	6	7.9e-08	MLP1,PTR2,PXL1,RPL40B,TGL4
chrXV	629132-645369	14	8.5e-08	NFI1,PET123,PNS1,SEY1,YOR161C-C,YRR1
chrXVI	860143-924291	89	8.9e-08	ATG13,BSP1,DPB2,DPM1,GDB1,GPH1,HDA3,JIP5,MLC2,MMS1,NUT2,OPT2,ORC4,PRP4,PZF1,QCR2,RPC82,SEC23,SGV1,SKI3,SMX3,VPS4,YPR159C-A,YPR170W-B,YPR174C
chrXV	766673-784086	25	9.2e-08	HER1,HES1,KIN4,MKK1,RPL33B,WTM1,WTM2,YOR228C,YOR238W
chrIX	303350-303489	2	9.6e-08	EMC5
chrIV	21718-22525	3	1e-07	LRG1,YDL241W
chrVII	547656-547958	3	1e-07	GSC2,IMO32
chrX	422921	1	1e-07	CTK2
chrXII	891755-891782	2	1e-07	IKI3
chrXIV	76137	1	1e-07	MON2
chrXIII	512193	1	1.1e-07	YMR122W-A
chrXV	848683-991150	80	1.1e-07	BUD7,CIN1,COT1,CPA1,FAA1,FRT1,GNT1,HSH49,HUA2,KRE5,MIP1,MYO2,PDR10,PMT3,PYK2,RAX1,RDL1,REV1,RPA190,RPA43,RPL20B,SCD5,SFG1,SLY41,SNF2,TEA1,TYE7,YOR289W,YOR296W,YOR316C-A,YOR338W,YOR342C,YPK9
chrII	299698-383960	90	1.2e-07	AKL1,BAP2,CSG2,ECM2,EDS1,FAT1,FIG1,FMP23,GIP1,HSP26,NRG2,ORC2,PDX3,PRP6,QDR3,RDH54,REB1,REG2,RKM3,RPL4A,TAT1,TCM62,TIP1,TRM7,YBR056W,YBR063C,YBR071W,YRO2,ZTA1
chrIV	37597	1	1.2e-07	YDL233W
chrV	3860-77905	60	1.3e-07	AFG1,AVT2,CAN1,CIN8,DLD3,DSF1,GLY1,HAT2,IES6,MAK10,PAU2,PCM1,POL5,RMD6,RML2,SIT1,SOM1,TCA17,UTR2,YEL043W,YEL067C,YEL077C
chrVI	14848-19935	5	1.3e-07	AAD6,YFL054C
chrVIII	240738	1	1.3e-07	ERG7
chrI	219962-226344	9	1.4e-07	PHO11,YAR064W,YAR068W
chrII	2182-2395	2	1.4e-07	YBL113C
chrVI	236557	1	1.6e-07	SAP155
chrXV	31750	1	1.6e-07	HPF1
chrII	627887	1	1.7e-07	MCM7
chrII	189661-244090	44	1.7e-07	ACH1,ALK2,COQ1,ECM15,FUS3,HIR1,PDR3,PEP1,RRN6,SCT1,SLA1,UTP20,YBL008W-A,YBL010C
chrII	265684-265770	2	1.7e-07	YBR013C
chrII	287110-288484	3	1.7e-07	CHS3
chrIV	441305	1	1.7e-07	MED2
chrIV	1137245-1179751	39	1.7e-07	ATP22,FCF1,HXT3,HXT6,HXT7,MRP1,MRPS28,SBE2,SVF1,SWR1,YDR338C,YPS7
chrIV	1197543-1202720	5	1.7e-07	CDC40,SEM1,TFC6
chrIV	367539-418067	58	1.7e-07	BSC1,DIA3,GPD1,GPM2,GPR1,MPS1,MTF2,NAT1,OSH2,PRM7,PUS9,RPN4,RTK1,SIR2,SIT4,SLM3,STP4,YDL027C
chrIV	478105-484051	3	1.7e-07	GCV1,HED1,YDR018C
chrIV	638098-641184	3	1.7e-07	GIS1,MSH6
chrIV	669601-681321	8	1.7e-07	ALT2,FOB1,PDS1,TMN2,TRS85,YDR109C
chrIV	699549-716702	13	1.7e-07	ARO1,FIN1,INO2,MTC5,SAC6
chrIV	807628-810744	3	1.7e-07	ARG82,HSP42
chrIV	959103-966390	3	1.7e-07	CHL4,YDR249C
chrIV	976876-979706	3	1.7e-07	EXG2,SWM1
chrV	106422-131479	15	1.7e-07	EDC3,GEA2,GTT3,MMS21,NPP2,PMP2,UBC8,VAC8,YEL020C,YEL023C,YEL025C
chrV	154013-162340	13	1.7e-07	FMP52,MNN1,NOP16,PMI40,YND1
chrV	173318-192670	17	1.7e-07	AFG3,BIM1,FAA2,PRP22,SPC25,TIR1,YER010C
chrV	216124-349106	135	1.7e-07	ACA1,AIM10,AIM11,AIM9,ALD5,ARB1,DOT6,ERG28,FCY2,FCY21,FCY22,FIR1,GET2,GIP2,GLN3,HOR2,HVG1,ICL1,ICP55,IES5,ISD11,JHD1,MEI4,MOT2,PCL6,PET117,PHM8,PTC2,PTP3,PUP3,RNR1,RRT13,RSM18,SAP1,SER3,TDA2,THO1,TPA1,TRP2,TSC11,VHR2,VTC1,YEN1,YER053C-A,YER076C,YER077C,YER079W,YER085C,YOS1,ZRG8
chrVI	31135-34169	3	1.7e-07	ALR2,YFL051C
chrVII	676025	1	1.7e-07	RRP46
chrVII	1003324-1009812	5	1.7e-07	COQ6,GND2,RAD2
chrVII	1080184-1087166	4	1.7e-07	PAU12,YRF1-3
chrVII	347682-349101	2	1.7e-07	MAD1
chrVII	41497-54723	12	1.7e-07	HAP2,KAP114,MTO1,RTF1
chrVII	625276-664694	81	1.7e-07	ART5,CTT1,ENV11,GCD2,MRP13,MRPL25,NNF2,PAC10,PDC6,PEX8,PIL1,PRP38,ROM1,RPL11B,SMD1,TOM20,UPF3,UTP22
chrVII	693977-756009	33	1.7e-07	ASN2,CLB1,CLB6,CLD1,COG2,FHN1,GTF1,MEP1,NUP57,PCP1,PHB1,PPT1,RPS23A,SPT6,SRB5,UTP8,YGR121W-A,YGR122W,YGR125W,YGR126W,YGR130C
chrVII	766363-811324	56	1.7e-07	BTN2,CBF2,CHO2,CYS4,GTO1,MTR3,NAT2,NSR1,RSR1,RTS3,SKN1,TPO2,VPS62,YGR153W,YGR161W-C
chrVII	7936-21782	18	1.7e-07	ADH4,MNT2,YGL258W-A,YPS5,ZRT1
chrVIII	282877-301804	12	1.7e-07	GAR1,HXT1,HXT4,HXT5,SFB3
chrVIII	553270-554653	5	1.7e-07	IMD2,PHO12
chrVIII	58524-102157	51	1.7e-07	AIM17,DUR3,ETP1,LAG1,NPR3,OPI1,OTU2,PRS3,RIM4,RPS20,SPO11,YAP3,YHL008C,YHL015W-A,YHL017W
chrIX	88821-90521	4	1.7e-07	REV7,TMA108,TPM2
chrX	100496-123761	10	1.7e-07	ASG7,FAR1,HAL5,JJJ2,TPK1,YJL163C,YJL171C
chrX	566943-567353	4	1.7e-07	YAE1
chrX	73732-83981	8	1.7e-07	GON7,MNN11,RPL39,RPS14B,RPS22A
chrXI	250518-280538	43	1.7e-07	BUD2,CAB3,CUE2,CWP1,CWP2,HOT13,HSL1,MBR1,MDH1,MIF2,MTC2,SRX1,YJU2,YJU3,YKL091C,YKL096C-B,YKL100C
chrXI	310828-379888	83	1.7e-07	ASK1,CSE4,DCW1,ELM1,FBA1,IXR1,MDM35,MNR2,MSN4,NUP100,NUP120,OAR1,PHD1,PRI2,PTM1,RGT1,SPC42,TMA19,TOA2,TUL1,UGP1,VPS24,YKL033W-A,YKL047W,YKL063C,YKL065W-A
chrXI	396831-397150	2	1.7e-07	CDC16
chrXI	412188-508406	151	1.7e-07	ALY1,ARC19,AUR1,BCH2,BYE1,CAP1,CCE1,DBP7,DID2,DID4,ECM9,FCJ1,FOX2,GCN3,GMH1,LAC1,MET14,MRP17,MRT4,OSH6,PAP1,PRP40,RPC37,RPL14A,RSC4,SAP190,SET3,SFT1,SPO14,TOF2,UFD4,URB1,VPS1,YKR005C,YKR011C,YKR017C,YKR018C,YKR023W
chrXI	521737-571639	46	1.7e-07	BET3,DYN1,FMP46,GLG1,GPT2,LAS1,MET1,NAP1,OAF3,PET10,RHO4,SHB17,TFA2,TIF1,TRK2,UIP5,YSR3
chrXII	162493-205086	25	1.7e-07	AAT2,ADE16,BRE2,IZH3,LOT6,NSE1,PAM18,POM34,PPR1,PSR2,RAD5,RPL15A,SDO1,SED5,SNF7,SSK1,UBR2,YLR030W
chrXII	335561-344280	13	1.7e-07	APC9,CDC45,CHA4,HRT3,ICT1,KIN2
chrXII	358026-468178	148	1.7e-07	ACE2,ACF2,ACS2,APC2,AVL9,CFT2,CLF1,DCN1,DIP2,HOG1,MDN1,MSL5,NHA1,PDC5,PEP3,PUT1,RKM5,RMP1,RNH203,RRN5,SLS1,SLX4,SPE4,SRN2,STM1,TIS11,USB1,YLR125W,YLR126C,YLR143W,YLR149C,YLR152C,YLR154C-G,YLR154C-H,YPS1,YPS3,ZRT2
chrXII	676573-678116	5	1.7e-07	BOP2,PDR8
chrXIII	702482	1	1.7e-07	GUA1
chrXIII	13505-24625	11	1.7e-07	COX14,ERO1,MSC1,PHO84,RSC9,TUB3
chrXIV	674690	1	1.7e-07	SEC12
chrXIV	731318-772236	25	1.7e-07	BIO3,BIO4,BIO5,BSC5,DSE4,FRE4,HXT17,MNT4,PDR18,YNR061C,YNR062C,YNR063W,YNR065C,YNR071C
chrXV	814706	1	1.7e-07	GCD1
chrXV	108220-140030	34	1.7e-07	COQ3,HMI1,INO4,ITR2,IZH4,MDY2,MSB4,NDJ1,PKH2,TPT1,WRS1,WSC3,YOL097W-A,YOL098C,YOL107W,ZEO1
chrXV	160967-169599	9	1.7e-07	ADH1,ATG19,ATG34
chrXV	488996-495340	12	1.7e-07	ECM3,TMA46,YVC1
chrXV	509642-582149	44	1.7e-07	AFI1,AZF1,BAG7,EFT1,GCY1,IAH1,IDH2,LEO1,LEU9,NUP1,ORT1,PIN2,RGA1,RIO1,RPO31,RTC5,SIA1,TFC7,UBP2,YOR111W,YOR114W
chrXV	56332-94972	30	1.7e-07	ALR1,BSC6,GAS4,HRP1,MCH4,MDH2,MED7,PFK27,RRP40,RTC1,TRM11,VPS68,YGK3,YOL131W
chrXV	796356-801555	6	1.7e-07	CLP1,ENV9,SRL1
chrXV	825148-837673	4	1.7e-07	HRK1,MOD5,VPH1
chrXVI	456445-501668	41	1.7e-07	CAM1,DIG1,ERG10,ISM1,LEE1,NOP4,SKS1,SMA1,SRL4,SUV3,TRM44,VPS16,YPL034W,YPL041C
chrXVI	814215-843720	28	1.7e-07	ASN1,CUR1,KAR3,LOA1,NCA2,NCE102,NOC4,PIN3,RRP15,TAZ1,TDA6,TPO3,URN1,YPR153W
chrI	206387	1	1.8e-07	FLO1
chrIII	47161	1	1.8e-07	MGR1
chrIV	565786-568833	2	1.8e-07	TGL2,YOS9
chrV	571587-575022	3	1.8e-07	YRF1-2
chrXV	1086859-1087435	4	1.8e-07	YRF1-8
chrVIII	6166-6175	2	1.9e-07	COS8
chrIX	1842-2143	2	1.9e-07	YIL177C
chrX	1825	1	1.9e-07	YJL225C
chrXII	2091	1	1.9e-07	YLL067C
chrXII	1065661-1074470	5	1.9e-07	YLR462W,YRF1-5
chrXIV	3796	1	1.9e-07	YRF1-6
chrXV	594739	1	1.9e-07	LSC1
chrXVI	3705	1	1.9e-07	YRF1-7
chrVIII	543127	1	2e-07	YHR214W
chrIV	451799-457815	2	2.3e-07	MAF1,NTH1
chrIX	24790	1	2.3e-07	YIL169C
chrIV	1835	1	2.4e-07	COS7
chrX	136384	1	2.7e-07	SNA3
chrIV	611442-615649	3	2.8e-07	AFR1,STN1
chrIX	414346	1	2.8e-07	DAL7
chrXII	759290-759309	3	2.8e-07	MRPL15
chrXIV	709062	1	2.8e-07	FPK1
chrXII	85096	1	3.8e-07	TPO1
chrXVI	150643	1	3.9e-07	LEA1
