# Supplementary material for: The 100-genomes strains, an S. cerevisiae resource that illuminates its natural phenotypic and genotypic variation and emergence as an opportunistic pathogen
Source: HighWire-hosted journal article supplement (doi:10.1101/gr.185538.114), 2015-04-03
Supplement: Table_S19_AccNo.xlsx [file Table_S19_AccNo.xlsx]

## Sheet: Sheet1
List of the 93 strains sequenced in this study and their accession numbers for each chromosome in GenBank.
Strain	Chr01	Chr02	Chr03	Chr04	Chr05	Chr06	Chr07	Chr08	Chr09	Chr10	Chr11	Chr12	Chr13	Chr14	Chr15	Chr16	Mito	2micron	Strain	SRA_Run
YJM1078	CP004099	CP004100	CP004101	CP004102	CP004103	CP004104	CP004105	CP004106	CP004107	CP004108	CP004109	CP004110	CP004111	CP004112	CP004113	CP004114	CP004115	CP004116	YJM1078	SRR800854
YJM1083	CP004444	CP004603	CP006273	CP004694	CP004788	CP004924	CP005228	CP006061	CP005016	CP005111	CP005325	CP006377	CP005426	CP005528	CP005622	CP006153	CP006508	CP004530	YJM1083	SRR800855
YJM1129	CP004445	CP004604	CP006274	CP004695	CP004789	CP004925	CP005229	CP006062	CP005017	CP005112	CP005326	CP006378	CP005427	CP005529	CP005623	CP006154	CP006509	CP004531	YJM1129	SRR800856
YJM1133	CP004446	CP004605	CP006275	CP004696	CP004790	CP004926	CP005230	CP006063	CP005018	CP005113	CP005327	CP006379	CP005428	CP005530	CP005624	CP006155	CP006510	CP004532	YJM1133	SRR800798
YJM1190	CP004447	CP004606	CP006276	CP004697	CP004791	CP004927	CP005231	CP006064	CP005019	CP005133	CP005328	CP006380	CP005429	CP005531	CP005625	CP006156	CP006511	CP004533	YJM1190	SRR800799
YJM1199	CP004448	CP004607	CP006277	CP004698	CP004792	CP004928	CP005232	CP006065	CP005020	CP005134	CP005329	CP006381	CP005430	CP005532	CP005626	CP006157	CP006512	CP004534	YJM1199	SRR800800
YJM1202	CP004449	CP004608	CP006278	CP004699	CP004793	CP004929	CP005233	CP006066	CP005021	CP005135	CP005330	CP006382	CP005431	CP005533	CP005627	CP006158	CP006513	CP004535	YJM1202	SRR800801
YJM1208	CP004450	CP004609	CP006279	CP004700	CP004794	CP004930	CP005234	CP006067	CP005022	CP005136	CP005331	CP006383	CP005432	CP005534	CP005628	CP006159	CP006514	CP004536	YJM1208	SRR800802
YJM1242	CP004451	CP004610	CP006280	CP004701	CP004795	CP004931	CP005235	CP006068	CP005023	CP005137	CP005332	CP006384	CP005433	CP005535	CP005629	CP006160	CP006515	CP004537	YJM1242	SRR800803
YJM1244	CP004452	CP004611	CP006281	CP004702	CP004796	CP004932	CP005236	CP006069	CP005024	CP005138	CP005333	CP006385	CP005434	CP005536	CP005630	CP006161	CP006516	CP004538	YJM1244	SRR800804
YJM1248	CP004453	CP004612	CP006282	CP004703	CP004797	CP004933	CP005237	CP006070	CP005025	CP005139	CP005334	CP006386	CP005435	CP005537	CP005631	CP006162	CP006517		YJM1248	SRR800805
YJM1250	CP004454	CP004613	CP006283	CP004704	CP004798	CP004934	CP005238	CP006071	CP005026	CP005140	CP005335	CP006387	CP005436	CP005538	CP005632	CP006163	CP006518	CP004539	YJM1250	SRR800806
YJM1252	CP004455	CP004637	CP006284	CP004705	CP004800	CP004935	CP005239	CP006072	CP005028	CP005141	CP005336	CP006388	CP005437	CP005539	CP005633	CP006164	CP006519		YJM1252	SRR800807
YJM1273	CP004456	CP004638	CP006285	CP004706	CP004801	CP004936	CP005240	CP006073	CP005029	CP005142	CP005337	CP006389	CP005438	CP005540	CP005634	CP006165	CP006520		YJM1273	SRR800808
YJM1304	CP004457	CP004639	CP006286	CP004707	CP004802	CP004937	CP005241	CP006074	CP005030	CP005143	CP005338	CP006390	CP005439	CP005541	CP005635	CP006166	CP006521	CP004540	YJM1304	SRR800809
YJM1307	CP004458	CP004640	CP006287	CP004708	CP004803	CP004938	CP005242	CP006075	CP005031	CP005144	CP005339	CP006391	CP005440	CP005542	CP005636	CP006167	CP006522	CP004541	YJM1307	SRR800810
YJM1311	CP004459	CP004641	CP006288	CP004709	CP004804	CP004939	CP005243	CP006076	CP005032	CP005145	CP005340	CP006392	CP005441	CP005543	CP005637	CP006168	CP006523	CP004542	YJM1311	SRR800811
YJM1326	CP004460	CP004642	CP006289	CP004710	CP004805	CP004940	CP005244	CP006077	CP005033	CP005146	CP005341	CP006393	CP005442	CP005544	CP005638	CP006169	CP006524	CP004543	YJM1326	SRR800812
YJM1332	CP004461	CP004643	CP006290	CP004711	CP004806	CP004941	CP005245	CP006078	CP005034	CP005147	CP005342	CP006394	CP005443	CP005545	CP005639	CP006170	CP006525	CP004544	YJM1332	SRR800813
YJM1336	CP004462	CP004644	CP006291	CP004712	CP004807	CP004942	CP005246	CP006079	CP005035	CP005148	CP005343	CP006395	CP005444	CP005546	CP005640	CP006171	CP006526	CP004545	YJM1336	SRR800814
YJM1338	CP004463	CP004645	CP006292	CP004713	CP004808	CP004943	CP005247	CP006080	CP005036	CP005149	CP005344	CP006396	CP005445	CP005547	CP005641	CP006172	CP006527	CP004546	YJM1338	SRR800815
YJM1341	CP004464	CP004646	CP006293	CP004714	CP004809	CP004944	CP005248	CP006081	CP005037	CP005150	CP005345	CP006397	CP005446	CP005548	CP005642	CP006173	CP006528	CP004547	YJM1341	SRR800816
YJM1342	CP004465	CP004647	CP006294	CP004715	CP004810	CP004945	CP005249	CP006082	CP005038	CP005151	CP005346	CP006398	CP005447	CP005549	CP005643	CP006174	CP006529		YJM1342	SRR800817
YJM1355	CP004466	CP004648	CP006295	CP004716	CP004811	CP004946	CP005250	CP006083	CP005039	CP005152	CP005347	CP006399	CP005448	CP005550	CP005644	CP006175	CP006530	CP004548	YJM1355	SRR800818
YJM1356	CP004467	CP004649	CP006296	CP004717	CP004812	CP004947	CP005251	CP006084	CP005040	CP005153	CP005348	CP006400	CP005449	CP005551	CP005645	CP006176	CP006531	CP004549	YJM1356	SRR800819
YJM1381	CP004468	CP004650	CP006297	CP004718	CP004813	CP004948	CP005252	CP006085	CP005041	CP005154	CP005349	CP006401	CP005450	CP005552	CP005646	CP006177	CP006532	CP004550	YJM1381	SRR800820
YJM1383	CP004469	CP004651	CP006298	CP004719	CP004814	CP004949	CP005253	CP006086	CP005042	CP005155	CP005350	CP006402	CP005451	CP005553	CP005647	CP006178	CP006533	CP004551	YJM1383	SRR800821
YJM1385	CP004470	CP004652	CP006299	CP004720	CP004815	CP004950	CP005254	CP006087	CP005043	CP005156	CP005351	CP006403	CP005452	CP005554	CP005648	CP006179	CP006534		YJM1385	SRR800822
YJM1386	CP004471	CP004653	CP006300	CP004721	CP004816	CP004951	CP005255	CP006088	CP005044	CP005157	CP005352	CP006404	CP005453	CP005555	CP005649	CP006180	CP006535	CP004552	YJM1386	SRR800823
YJM1387	CP004472	CP004654	CP006301	CP004722	CP004817	CP004952	CP005256	CP006089	CP005045	CP005158	CP005353	CP006405	CP005454	CP005556	CP005650	CP006181	CP006536		YJM1387	SRR800824
YJM1388	CP004473	CP004655	CP006302	CP004723	CP004818	CP004953	CP005257	CP006090	CP005046	CP005159	CP005354	CP006406	CP005455	CP005557	CP005651	CP006182	CP006537		YJM1388	SRR800825
YJM1389	CP004474	CP004656	CP006303	CP004724	CP004819	CP004954	CP005258	CP006091	CP005047	CP005160	CP005355	CP006407	CP005456	CP005558	CP005652	CP006183	CP006538		YJM1389	SRR800826
YJM1399	CP004475	CP004657	CP006304	CP004725	CP004820	CP004955	CP005259	CP006092	CP005048	CP005161	CP005356	CP006408	CP005457	CP005559	CP005653	CP006184	CP006539		YJM1399	SRR800827
YJM1400	CP004476	CP004658	CP006305	CP004726	CP004821	CP004956	CP005260	CP006093	CP005049	CP005162	CP005357	CP006409	CP005458	CP005560	CP005654	CP006185	CP006540	CP004553	YJM1400	SRR800828
YJM1401	CP004477	CP004659	CP006306	CP004727	CP004822	CP004957	CP005261	CP006094	CP005050	CP005163	CP005358	CP006410	CP005459	CP005561	CP005655	CP006186	CP006541	CP004554	YJM1401	SRR800829
YJM1402	CP004478	CP004568	CP006307	CP004728	CP004823	CP004958	CP005262	CP006095	CP005051	CP005164	CP005359	CP006411	CP005460	CP005562	CP005656	CP006187	CP006542		YJM1402	SRR800830
YJM1415	CP004479	CP004569	CP006308	CP004729	CP004824	CP004959	CP005263	CP006096	CP005052	CP005165	CP005360	CP006412	CP005461	CP005563	CP005657	CP006188	CP006543	CP004555	YJM1415	SRR800831
YJM1417	CP004480	CP004570	CP006309	CP004730	CP004825	CP004960	CP005264	CP006097	CP005053	CP005166	CP005361	CP006413	CP005462	CP005564	CP005658	CP006189	CP006544	CP004556	YJM1417	SRR800832
YJM1418	CP004481	CP004571	CP006310	CP004731	CP004826	CP004961	CP005265	CP006098	CP005054	CP005167	CP005362	CP006414	CP005463	CP005565	CP005659	CP006190	CP006545		YJM1418	SRR800833
YJM1419	CP004482	CP004572	CP006311	CP004732	CP004827	CP004962	CP005266	CP006099	CP005055	CP005168	CP005363	CP006415	CP005464	CP005566	CP005660	CP006191	CP006546	CP004557	YJM1419	SRR800834
YJM1433	CP004483	CP004573	CP006312	CP004733	CP004828	CP004963	CP005267	CP006100	CP005056	CP005169	CP005364	CP006416	CP005465	CP005567	CP005661	CP006192	CP006547	CP004558	YJM1433	SRR800835
YJM1434	CP004484	CP004574	CP006313	CP004734	CP004829	CP004964	CP005268	CP006101	CP005057	CP005170	CP005365	CP006417	CP005466	CP005568	CP005662	CP006193	CP006548		YJM1434	SRR800836
YJM1439	CP004485	CP004575	CP006314	CP004735	CP004830	CP004965	CP005269	CP006102	CP005058	CP005171	CP005366	CP006418	CP005467	CP005569	CP005663	CP006194	CP006549		YJM1439	SRR800837
YJM1443	CP004486	CP004576	CP006315	CP004736	CP004831	CP004966	CP005270	CP006103	CP005059	CP005172	CP005367	CP006419	CP005468	CP005570	CP005664	CP006195	CP006550		YJM1443	SRR800838
YJM1444	CP004487	CP004577	CP006316	CP004737	CP004832	CP004967	CP005271	CP006104	CP005060	CP005173	CP005368	CP006420	CP005469	CP005571	CP005665	CP006196	CP006551		YJM1444	SRR800839
YJM1447	CP004488	CP004578	CP006317	CP004738	CP004833	CP004968	CP005272	CP006105	CP005061	CP005174	CP005369	CP006421	CP005470	CP005572	CP005666	CP006197	CP006552		YJM1447	SRR800840
YJM1450	CP004489	CP004579	CP006318	CP004739	CP004834	CP004969	CP005273	CP006106	CP005062	CP005175	CP005370	CP006422	CP005471	CP005573	CP005667	CP006198	CP006553	CP004559	YJM1450	SRR800841
YJM1460	CP004490	CP004580	CP006319	CP004740	CP004835	CP004970	CP005274	CP006107	CP005063	CP005176	CP005371	CP006423	CP005472	CP005574	CP005668	CP006199	CP006554		YJM1460	SRR800842
YJM1463	CP004491	CP004581	CP006320	CP004741	CP004836	CP004971	CP005275	CP006108	CP005064	CP005177	CP005372	CP006424	CP005473	CP005575	CP005669	CP006200	CP006555	CP004560	YJM1463	SRR800843
YJM1477	CP004492	CP004582	CP006321	CP004742	CP004837	CP004972	CP005276	CP006109	CP005065	CP005178	CP005373	CP006425	CP005474	CP005576	CP005670	CP006201	CP006556	CP004561	YJM1477	SRR800844
YJM1478	CP004493	CP004583	CP006322	CP004743	CP004838	CP004973	CP005277	CP006110	CP005066	CP005179	CP005374	CP006426	CP005475	CP005577	CP005671	CP006202	CP006557	CP004562	YJM1478	SRR800845
YJM1479	CP004494	CP004584	CP006323	CP004744	CP004839	CP004974	CP005278	CP006111	CP005067	CP005180	CP005375	CP006427	CP005476	CP005578	CP005672	CP006203	CP006558	CP004563	YJM1479	SRR800846
YJM1526	CP004495	CP004585	CP006324	CP004745	CP004840	CP004975	CP005279	CP006112	CP005068	CP005181	CP005376	CP006428	CP005477	CP005579	CP005673	CP006204	CP006559	CP004564	YJM1526	SRR800847
YJM1527	CP004496	CP004586	CP006325	CP004746	CP004841	CP004976	CP005280	CP006113	CP005069	CP005182	CP005377	CP006429	CP005478	CP005580	CP005674	CP006205	CP006560	CP004565	YJM1527	SRR800848
YJM1549	CP004497	CP004587	CP006326	CP004747	CP004842	CP004977	CP005281	CP006114	CP005070	CP005183	CP005378	CP006430	CP005479	CP005581	CP005675	CP006206	CP006561		YJM1549	SRR800849
YJM1573	CP004498	CP004588	CP006327	CP004748	CP004843	CP004978	CP005282	CP006115	CP005071	CP005184	CP005379	CP006431	CP005480	CP005582	CP005676	CP006207	CP006562		YJM1573	SRR800850
YJM1574	CP004499	CP004589	CP006328	CP004749	CP004844	CP004979	CP005283	CP006116	CP005072	CP005185	CP005380	CP006432	CP005481	CP005583	CP005677	CP006208	CP006563	CP004566	YJM1574	SRR800851
YJM1592	CP004500	CP004590	CP006329	CP004750	CP004845	CP004980	CP005284	CP006117	CP005073	CP005186	CP005381	CP006433	CP005482	CP005584	CP005678	CP006209	CP006564		YJM1592	SRR800852
YJM1615	CP004501	CP004591	CP006330	CP004751	CP004799	CP004981	CP005285	CP006118	CP005027	CP005187	CP005382	CP006434	CP005483	CP005585	CP005679	CP006210	CP006565	CP004567	YJM1615	SRR800853
YJM189	CP004410	CP004614	CP006331	CP004660	CP004754	CP004890	CP005194	CP006119	CP004982	CP005114	CP005291	CP006435	CP005392	CP005494	CP005588	CP006211	CP006474	CP004502	YJM189	SRR800764
YJM193	CP004411	CP004615	CP006332	CP004661	CP004755	CP004891	CP005195	CP006120	CP004983	CP005115	CP005292	CP006436	CP005393	CP005495	CP005589	CP006212	CP006475	CP004503	YJM193	SRR800765
YJM195	CP004412	CP004616	CP006333	CP004662	CP004756	CP004892	CP005196	CP006121	CP004984	CP005116	CP005293	CP006437	CP005394	CP005496	CP005590	CP006213	CP006476		YJM195	SRR800766
YJM244	CP004413	CP004617	CP006334	CP004663	CP004757	CP004893	CP005197	CP006122	CP004985	CP005117	CP005294	CP006438	CP005395	CP005497	CP005591	CP006214	CP006477	CP004504	YJM244	SRR800767
YJM248	CP004414	CP004618	CP006335	CP004664	CP004758	CP004894	CP005198	CP006123	CP004986	CP005118	CP005295	CP006439	CP005396	CP005498	CP005592	CP006215	CP006478	CP004505	YJM248	SRR800768
YJM270	CP004415	CP004619	CP006336	CP004665	CP004759	CP004895	CP005199	CP006124	CP004987	CP005119	CP005296	CP006440	CP005397	CP005499	CP005593	CP006216	CP006479		YJM270	SRR800769
YJM271	CP004416	CP004620	CP006337	CP004666	CP004760	CP004896	CP005200	CP006125	CP004988	CP005120	CP005297	CP006441	CP005398	CP005500	CP005594	CP006217	CP006480	CP004506	YJM271	SRR800770
YJM320	CP004417	CP004621	CP006338	CP004667	CP004761	CP004897	CP005201	CP006126	CP004989	CP005121	CP005298	CP006442	CP005399	CP005501	CP005595	CP006218	CP006481	CP004507	YJM320	SRR800771
YJM326	CP004418	CP004622	CP006339	CP004668	CP004762	CP004898	CP005202	CP006127	CP004990	CP005122	CP005299	CP006443	CP005400	CP005502	CP005596	CP006219	CP006482	CP004508	YJM326	SRR800772
YJM428	CP004419	CP004623	CP006340	CP004669	CP004763	CP004899	CP005203	CP006128	CP004991	CP005123	CP005300	CP006444	CP005401	CP005503	CP005597	CP006220	CP006483	CP004509	YJM428	SRR800773
YJM450	CP004420	CP004624	CP006341	CP004670	CP004764	CP004900	CP005204	CP006129	CP004992	CP005124	CP005301	CP006445	CP005402	CP005504	CP005598	CP006221	CP006484	CP004510	YJM450	SRR800774
YJM451	CP004421	CP004625	CP006342	CP004671	CP004765	CP004901	CP005205	CP006130	CP004993	CP005125	CP005302	CP006446	CP005403	CP005505	CP005599	CP006222	CP006485	CP004511	YJM451	SRR800775
YJM453	CP004422	CP004626	CP006343	CP004672	CP004766	CP004902	CP005206	CP006131	CP004994	CP005126	CP005303	CP006447	CP005404	CP005506	CP005600	CP006223	CP006486	CP004512	YJM453	SRR800776
YJM456	CP004423	CP004627	CP006344	CP004673	CP004767	CP004903	CP005207	CP006132	CP004995	CP005127	CP005304	CP006448	CP005405	CP005507	CP005601	CP006224	CP006487	CP004513	YJM456	SRR800777
YJM470	CP004424	CP004628	CP006345	CP004674	CP004768	CP004904	CP005208	CP006133	CP004996	CP005128	CP005305	CP006449	CP005406	CP005508	CP005602	CP006225	CP006488		YJM470	SRR800778
YJM541	CP004425	CP004629	CP006346	CP004675	CP004769	CP004905	CP005209	CP006134	CP004997	CP005129	CP005306	CP006450	CP005407	CP005509	CP005603	CP006226	CP006489	CP004514	YJM541	SRR800779
YJM554	CP004426	CP004630	CP006347	CP004676	CP004770	CP004906	CP005210	CP006135	CP004998	CP005130	CP005307	CP006451	CP005408	CP005510	CP005604	CP006227	CP006490	CP004515	YJM554	SRR800780
YJM555	CP004427	CP004631	CP006348	CP004677	CP004771	CP004907	CP005211	CP006136	CP004999	CP005131	CP005308	CP006452	CP005409	CP005511	CP005605	CP006228	CP006491	CP004516	YJM555	SRR800781
YJM627	CP004428	CP004632	CP006349	CP004678	CP004772	CP004908	CP005212	CP006137	CP005000	CP005132	CP005309	CP006453	CP005410	CP005512	CP005606	CP006229	CP006492	CP004517	YJM627	SRR800782
YJM681	CP004429	CP004633	CP006350	CP004679	CP004773	CP004909	CP005213	CP006138	CP005001	CP005096	CP005310	CP006454	CP005411	CP005513	CP005607	CP006230	CP006493	CP004518	YJM681	SRR800783
YJM682	CP004430	CP004634	CP006351	CP004680	CP004774	CP004910	CP005214	CP006139	CP005002	CP005097	CP005311	CP006455	CP005412	CP005514	CP005608	CP006231	CP006494	CP004519	YJM682	SRR800784
YJM683	CP004431	CP004635	CP006352	CP004681	CP004775	CP004911	CP005215	CP006140	CP005003	CP005098	CP005312	CP006456	CP005413	CP005515	CP005609	CP006232	CP006495		YJM683	SRR800785
YJM689	CP004432	CP004636	CP006353	CP004682	CP004776	CP004912	CP005216	CP006141	CP005004	CP005099	CP005313	CP006457	CP005414	CP005516	CP005610	CP006233	CP006496		YJM689	SRR800786
YJM693	CP004433	CP004592	CP006354	CP004683	CP004777	CP004913	CP005217	CP006142	CP005005	CP005100	CP005314	CP006458	CP005415	CP005517	CP005611	CP006234	CP006497		YJM693	SRR800787
YJM969	CP004434	CP004593	CP006355	CP004684	CP004778	CP004914	CP005218	CP006143	CP005006	CP005101	CP005315	CP006459	CP005416	CP005518	CP005612	CP006235	CP006498	CP004520	YJM969	SRR800788
YJM972	CP004435	CP004594	CP006356	CP004685	CP004779	CP004915	CP005219	CP006144	CP005007	CP005102	CP005316	CP006460	CP005417	CP005519	CP005613	CP006236	CP006499	CP004521	YJM972	SRR800789
YJM975	CP004436	CP004595	CP006357	CP004686	CP004780	CP004916	CP005220	CP006145	CP005008	CP005103	CP005317	CP006461	CP005418	CP005520	CP005614	CP006237	CP006500	CP004522	YJM975	SRR800790
YJM978	CP004437	CP004596	CP006358	CP004687	CP004781	CP004917	CP005221	CP006146	CP005009	CP005104	CP005318	CP006462	CP005419	CP005521	CP005615	CP006238	CP006501	CP004523	YJM978	SRR800791
YJM981	CP004438	CP004597	CP006359	CP004688	CP004782	CP004918	CP005222	CP006147	CP005010	CP005105	CP005319	CP006463	CP005420	CP005522	CP005616	CP006239	CP006502	CP004524	YJM981	SRR800792
YJM984	CP004439	CP004598	CP006360	CP004689	CP004783	CP004919	CP005223	CP006148	CP005011	CP005106	CP005320	CP006464	CP005421	CP005523	CP005617	CP006240	CP006503	CP004525	YJM984	SRR800793
YJM987	CP004440	CP004599	CP006361	CP004690	CP004784	CP004920	CP005224	CP006149	CP005012	CP005107	CP005321	CP006465	CP005422	CP005524	CP005618	CP006241	CP006504	CP004526	YJM987	SRR800794
YJM990	CP004441	CP004600	CP006362	CP004691	CP004785	CP004921	CP005225	CP006150	CP005013	CP005108	CP005322	CP006466	CP005423	CP005525	CP005619	CP006242	CP006505	CP004527	YJM990	SRR800795
YJM993	CP004442	CP004601	CP006363	CP004692	CP004786	CP004922	CP005226	CP006151	CP005014	CP005109	CP005323	CP006467	CP005424	CP005526	CP005620	CP006243	CP006506	CP004528	YJM993	SRR800796
YJM996	CP004443	CP004602	CP006364	CP004693	CP004787	CP004923	CP005227	CP006152	CP005015	CP005110	CP005324	CP006468	CP005425	CP005527	CP005621	CP006244	CP006507	CP004529	YJM996	SRR800797
